# Supplementary material for: RNA Sequencing of Whole Blood Defines the Signature of High Intensity Exercise at Altitude in Elite Speed Skaters
Source: Genes (Basel). 2022 Mar 24;13(4):574. doi: 10.3390/genes13040574 (PMC9027771; doi:10.3390/genes13040574)
Supplement: Supplementary file 1 [file genes-13-00574-s001.zip]

Archive with 6 entries (6 files):
- Supplementary Table S2.xlsx
- Supplementary Figures S1-S10.pdf
- Supplementary Table S1.xlsx
- Supplementary Table S3.xlsx
- Supplementary Table S5.xlsx
- Supplementary Table S4.xlsx
