# Supplementary material for: RNA Sequencing of Whole Blood Defines the Signature of High Intensity Exercise at Altitude in Elite Speed Skaters
Source: Genes (Basel). 2022 Mar 24;13(4):574. doi: 10.3390/genes13040574 (PMC9027771; doi:10.3390/genes13040574)
Supplement: Supplementary file 1 [file genes-13-00574-s001.zip › Supplementary Table S3.xlsx]

## Sheet: full 58k diffexp
Ensembl	Symbol	Gene_type	baseMean	log2FoldChange	stat	pvalue	padj
ENSG00000137094	DNAJB5	protein_coding	222.295	1.78638	12.2566	1.54839e-34	2.21002e-30
ENSG00000136867	SLC31A2	protein_coding	2042.06	0.930563	11.2251	3.06945e-29	2.19051e-25
ENSG00000159713	TPPP3	protein_coding	421.008	1.52874	10.554	4.8658e-26	2.31498e-22
ENSG00000179820	MYADM	protein_coding	14156	1.32008	10.3484	4.25674e-25	1.51891e-21
ENSG00000153234	NR4A2	protein_coding	96.8435	2.07912	10.261	1.05643e-24	3.01567e-21
ENSG00000136868	SLC31A1	protein_coding	545.418	0.861734	9.83504	7.95356e-23	1.62173e-19
ENSG00000184557	SOCS3	protein_coding	1363.2	1.2036	9.84148	7.4607e-23	1.62173e-19
ENSG00000183019	MCEMP1	protein_coding	544.368	1.19485	9.64166	5.33185e-22	9.51269e-19
ENSG00000125740	FOSB	protein_coding	213.833	2.18195	9.33832	9.78708e-21	1.55212e-17
ENSG00000107317	PTGDS	protein_coding	365.726	-1.00053	-9.25878	2.06775e-20	2.92144e-17
ENSG00000127951	FGL2	protein_coding	15093.9	0.798712	9.24969	2.25152e-20	2.92144e-17
ENSG00000196352	CD55	protein_coding	6172.82	1.11971	9.08141	1.07177e-19	1.27478e-16
ENSG00000270800	RPS10-NUDT3	protein_coding	241.359	1.2965	9.00658	2.12591e-19	2.33409e-16
ENSG00000140450	ARRDC4	protein_coding	389.078	1.11427	8.98458	2.59713e-19	2.64777e-16
ENSG00000124731	TREM1	protein_coding	6972.55	1.19176	8.96188	3.19178e-19	3.03709e-16
ENSG00000113368	LMNB1	protein_coding	2071.55	1.03318	8.89492	5.84593e-19	5.21493e-16
ENSG00000124882	EREG	protein_coding	38.4295	3.16343	8.80777	1.27661e-18	1.07182e-15
ENSG00000139318	DUSP6	protein_coding	5803.62	0.632889	8.75884	1.97272e-18	1.56426e-15
ENSG00000131873	CHSY1	protein_coding	1438.6	0.936575	8.72681	2.61946e-18	1.96776e-15
ENSG00000198604	BAZ1A	protein_coding	3401.24	0.780305	8.61712	6.86591e-18	4.89986e-15
ENSG00000165801	ARHGEF40	protein_coding	3335.91	0.993337	8.5817	9.3485e-18	6.35387e-15
ENSG00000170345	FOS	protein_coding	5387.16	1.3438	8.50004	1.89522e-17	1.22956e-14
ENSG00000086061	DNAJA1	protein_coding	3591.28	0.62801	8.37306	5.61391e-17	3.4838e-14
ENSG00000188313	PLSCR1	protein_coding	886.216	0.825873	8.30557	9.9339e-17	5.90777e-14
ENSG00000187116	LILRA5	protein_coding	3590.53	1.01728	8.25874	1.47216e-16	8.40483e-14
ENSG00000239961	LILRA4	protein_coding	314.987	-0.990938	-8.22264	1.99069e-16	1.09281e-13
ENSG00000155744	FAM126B	protein_coding	1078.76	0.970183	8.15148	3.59487e-16	1.90035e-13
ENSG00000122862	SRGN	protein_coding	40210.2	0.801351	8.11525	4.84789e-16	2.29198e-13
ENSG00000140379	BCL2A1	protein_coding	2149.39	1.06244	8.1172	4.77049e-16	2.29198e-13
ENSG00000163421	PROK2	protein_coding	3315.86	1.08344	8.12224	4.57646e-16	2.29198e-13
ENSG00000196083	IL1RAP	protein_coding	1622.03	0.887589	8.11203	4.97802e-16	2.29198e-13
ENSG00000170458	CD14	protein_coding	10044.3	0.81121	8.08176	6.38401e-16	2.84747e-13
ENSG00000159674	SPON2	protein_coding	1162.07	-1.23192	-8.05255	8.10887e-16	3.50721e-13
ENSG00000135604	STX11	protein_coding	2815.77	0.94819	7.95632	1.77226e-15	7.43983e-13
ENSG00000135378	PRRG4	protein_coding	565.791	1.1093	7.95216	1.83293e-15	7.47467e-13
ENSG00000155090	KLF10	protein_coding	897.043	0.747584	7.87865	3.30945e-15	1.3121e-12
ENSG00000149798	CDC42EP2	protein_coding	2168.62	1.05118	7.78359	7.04973e-15	2.71948e-12
ENSG00000163823	CCR1	protein_coding	2776.16	0.727353	7.72574	1.11209e-14	4.17706e-12
ENSG00000164823	OSGIN2	protein_coding	996.395	0.708134	7.64243	2.13154e-14	7.80089e-12
ENSG00000144655	CSRNP1	protein_coding	1430.85	0.958062	7.62352	2.4685e-14	8.80821e-12
ENSG00000152061	RABGAP1L	protein_coding	2116.02	0.719105	7.55839	4.08093e-14	1.42066e-11
ENSG00000164691	TAGAP	protein_coding	14599.1	0.702848	7.50992	5.91646e-14	2.01061e-11
ENSG00000123146	ADGRE5	protein_coding	27435.2	0.81264	7.48276	7.27795e-14	2.41577e-11
ENSG00000069974	RAB27A	protein_coding	3109.04	0.705969	7.4615	8.55411e-14	2.77484e-11
ENSG00000021355	SERPINB1	protein_coding	4304.4	0.514121	7.41085	1.25493e-13	3.98035e-11
ENSG00000138772	ANXA3	protein_coding	878.03	1.0761	7.39874	1.37482e-13	4.26582e-11
ENSG00000135046	ANXA1	protein_coding	8010.25	0.804553	7.36009	1.83784e-13	5.58116e-11
ENSG00000121552	CSTA	protein_coding	1701.71	0.817242	7.3215	2.45215e-13	7.29158e-11
ENSG00000158470	B4GALT5	protein_coding	3439.95	0.969328	7.28299	3.2651e-13	9.51078e-11
ENSG00000168229	PTGDR	protein_coding	164.746	-1.29356	-7.26092	3.84465e-13	1.09749e-10
ENSG00000160856	FCRL3	protein_coding	864.458	-0.633294	-7.2541	4.04333e-13	1.13158e-10
ENSG00000146540	C7orf50	protein_coding	639.485	-0.677641	-7.21737	5.30029e-13	1.45483e-10
ENSG00000099985	OSM	protein_coding	235.013	1.35886	7.15808	8.18128e-13	2.20323e-10
ENSG00000183621	ZNF438	protein_coding	521.597	0.798091	7.09766	1.26889e-12	3.35385e-10
ENSG00000166428	PLD4	protein_coding	878.247	-0.715949	-7.09411	1.3019e-12	3.37855e-10
ENSG00000241163	LINC00877	lincRNA	425.521	0.794564	7.06677	1.58576e-12	4.0417e-10
ENSG00000167536	DHRS13	protein_coding	864.463	0.858324	7.06105	1.65248e-12	4.13787e-10
ENSG00000117281	CD160	protein_coding	313.686	-1.35728	-7.04696	1.82863e-12	4.50002e-10
ENSG00000004478	FKBP4	protein_coding	945.574	0.6041	6.99445	2.66303e-12	6.44227e-10
ENSG00000070961	ATP2B1	protein_coding	2161.05	0.560132	6.97717	3.0118e-12	7.16456e-10
ENSG00000139132	FGD4	protein_coding	566.657	0.898146	6.95419	3.54595e-12	8.29695e-10
ENSG00000087074	PPP1R15A	protein_coding	4475.31	0.876883	6.94718	3.72667e-12	8.57915e-10
ENSG00000067082	KLF6	protein_coding	9723.81	0.732213	6.88599	5.73885e-12	1.30017e-09
ENSG00000059804	SLC2A3	protein_coding	9659.06	1.21973	6.88304	5.85888e-12	1.30662e-09
ENSG00000257017	HP	protein_coding	189.423	1.23514	6.82701	8.67019e-12	1.90384e-09
ENSG00000102317	RBM3	protein_coding	2494.6	-0.674987	-6.81293	9.56324e-12	2.06812e-09
ENSG00000166130	IKBIP	protein_coding	1330.02	0.810539	6.80523	1.00891e-11	2.14928e-09
ENSG00000163659	TIPARP	protein_coding	704.381	0.704099	6.79396	1.09098e-11	2.28993e-09
ENSG00000156675	RAB11FIP1	protein_coding	12543.6	0.888388	6.7682	1.30395e-11	2.69729e-09
ENSG00000075426	FOSL2	protein_coding	7012.25	1.05917	6.75644	1.41419e-11	2.88353e-09
ENSG00000160789	LMNA	protein_coding	696.624	0.693461	6.74781	1.50098e-11	3.0174e-09
ENSG00000112303	VNN2	protein_coding	23830.8	1.03239	6.61672	3.67262e-11	7.23833e-09
ENSG00000204131	NHSL2	protein_coding	3819.03	0.905238	6.61554	3.70208e-11	7.23833e-09
ENSG00000158710	TAGLN2	protein_coding	42895.2	0.64175	6.59844	4.15498e-11	8.01406e-09
ENSG00000034053	APBA2	protein_coding	815.504	-0.742934	-6.59051	4.38327e-11	8.34166e-09
ENSG00000134198	TSPAN2	protein_coding	669.41	0.634302	6.58847	4.44385e-11	8.34567e-09
ENSG00000168461	RAB31	protein_coding	4835.24	0.639669	6.58486	4.55304e-11	8.43968e-09
ENSG00000204397	CARD16	protein_coding	2486.3	0.54276	6.57777	4.77554e-11	8.73862e-09
ENSG00000112096	SOD2	protein_coding	44359.7	0.762831	6.56473	5.21261e-11	9.41767e-09
ENSG00000196411	EPHB4	protein_coding	997.269	1.17769	6.55364	5.61513e-11	1.00181e-08
ENSG00000126945	HNRNPH2	protein_coding	3339.2	0.603964	6.52497	6.80137e-11	1.19847e-08
ENSG00000116741	RGS2	protein_coding	27663.3	0.97728	6.5179	7.12989e-11	1.24104e-08
ENSG00000170525	PFKFB3	protein_coding	1829.85	0.957105	6.49866	8.10405e-11	1.3936e-08
ENSG00000105993	DNAJB6	protein_coding	3115.92	0.536646	6.47731	9.33725e-11	1.58655e-08
ENSG00000186469	GNG2	protein_coding	4182.19	0.535843	6.46916	9.85518e-11	1.65486e-08
ENSG00000150045	KLRF1	protein_coding	322.976	-1.21654	-6.42569	1.31272e-10	2.17865e-08
ENSG00000189067	LITAF	protein_coding	33911	0.832808	6.4122	1.4343e-10	2.35308e-08
ENSG00000137801	THBS1	protein_coding	846.895	1.08928	6.40156	1.53797e-10	2.49449e-08
ENSG00000148450	MSRB2	protein_coding	596.669	0.730535	6.36809	1.91394e-10	3.0694e-08
ENSG00000143409	MINDY1	protein_coding	3070.53	0.955014	6.32409	2.54729e-10	4.03971e-08
ENSG00000102265	TIMP1	protein_coding	2922.33	0.642742	6.32142	2.59166e-10	4.06492e-08
ENSG00000163297	ANTXR2	protein_coding	3207.49	0.734016	6.3123	2.74917e-10	4.2651e-08
ENSG00000169583	CLIC3	protein_coding	362.605	-0.811838	-6.30736	2.83832e-10	4.35606e-08
ENSG00000168209	DDIT4	protein_coding	1582.96	-0.770071	-6.30293	2.92062e-10	4.43468e-08
ENSG00000103355	PRSS33	protein_coding	274.1	-1.11172	-6.27658	3.4609e-10	5.19974e-08
ENSG00000159388	BTG2	protein_coding	8659.56	0.632703	6.2718	3.56893e-10	5.30618e-08
ENSG00000243660	ZNF487	protein_coding	229.467	0.865628	6.25537	3.96571e-10	5.83532e-08
ENSG00000069399	BCL3	protein_coding	2991.11	1.02233	6.24635	4.2016e-10	6.11933e-08
ENSG00000115828	QPCT	protein_coding	4031.61	1.07041	6.22705	4.75284e-10	6.85226e-08
ENSG00000081237	PTPRC	protein_coding	40732.4	0.420072	6.20496	5.47109e-10	7.75701e-08
ENSG00000165175	MID1IP1	protein_coding	3716.35	0.712947	6.20325	5.53105e-10	7.75701e-08
ENSG00000171368	TPPP	protein_coding	115.94	1.05651	6.20289	5.54344e-10	7.75701e-08
ENSG00000122884	P4HA1	protein_coding	486.93	0.594058	6.19454	5.84547e-10	8.10023e-08
ENSG00000280832	ST3GAL4-AS1	antisense	211.637	0.894411	6.18901	6.05428e-10	8.30891e-08
ENSG00000108946	PRKAR1A	protein_coding	8908.06	0.60737	6.18234	6.31564e-10	8.58507e-08
ENSG00000089280	FUS	protein_coding	4052.79	-0.48772	-6.17091	6.79001e-10	9.14281e-08
ENSG00000124831	LRRFIP1	protein_coding	7896.14	0.574238	6.16585	7.0105e-10	9.35149e-08
ENSG00000186205	MARC1	protein_coding	1439.6	1.22664	6.1539	7.56e-10	9.9911e-08
ENSG00000143384	MCL1	protein_coding	36550.6	0.689733	6.14998	7.74934e-10	1.01474e-07
ENSG00000146425	DYNLT1	protein_coding	1628.84	0.665112	6.11977	9.37096e-10	1.21593e-07
ENSG00000120696	KBTBD7	protein_coding	587.493	0.68504	6.09926	1.06563e-09	1.37024e-07
ENSG00000163349	HIPK1	protein_coding	3873.14	0.628202	6.09337	1.10561e-09	1.40896e-07
ENSG00000003402	CFLAR	protein_coding	11245.1	0.751836	6.08208	1.1863e-09	1.49842e-07
ENSG00000112195	TREML2	protein_coding	3221.86	0.835114	6.07948	1.20569e-09	1.50955e-07
ENSG00000114346	ECT2	protein_coding	74.1259	1.23148	6.06843	1.29167e-09	1.60313e-07
ENSG00000144802	NFKBIZ	protein_coding	1359.76	0.719887	6.0644	1.32449e-09	1.60495e-07
ENSG00000150054	MPP7	protein_coding	508.219	0.538556	6.06622	1.30957e-09	1.60495e-07
ENSG00000164609	SLU7	protein_coding	2112.18	0.461197	6.06411	1.32687e-09	1.60495e-07
ENSG00000064012	CASP8	protein_coding	4542.19	0.589277	6.05777	1.38017e-09	1.6416e-07
ENSG00000102218	RP2	protein_coding	1620.15	0.593908	6.05819	1.37662e-09	1.6416e-07
ENSG00000072401	UBE2D1	protein_coding	1564.1	0.62409	6.05184	1.43197e-09	1.68914e-07
ENSG00000080824	HSP90AA1	protein_coding	9756.84	0.513164	6.04646	1.48064e-09	1.73223e-07
ENSG00000165030	NFIL3	protein_coding	1913.41	0.889402	6.03157	1.62372e-09	1.88417e-07
ENSG00000170876	TMEM43	protein_coding	3829.29	0.657388	6.02693	1.67103e-09	1.92343e-07
ENSG00000196954	CASP4	protein_coding	6190.38	0.56895	6.02333	1.7086e-09	1.95095e-07
ENSG00000026025	VIM	protein_coding	32710.6	0.454241	6.01076	1.8466e-09	2.09101e-07
ENSG00000136250	AOAH	protein_coding	3271.17	0.537951	6.00826	1.87522e-09	2.09101e-07
ENSG00000213719	CLIC1	protein_coding	14902.8	0.440929	6.00875	1.86965e-09	2.09101e-07
ENSG00000163131	CTSS	protein_coding	51378.9	0.541639	5.98948	2.10517e-09	2.32924e-07
ENSG00000100346	CACNA1I	protein_coding	234.079	-0.829612	-5.96842	2.3956e-09	2.63019e-07
ENSG00000167552	TUBA1A	protein_coding	12862.8	0.645707	5.95356	2.62373e-09	2.85866e-07
ENSG00000125827	TMX4	protein_coding	3787.79	0.551409	5.94662	2.73743e-09	2.95995e-07
ENSG00000110203	FOLR3	protein_coding	2475.07	0.834631	5.9394	2.86061e-09	3.0667e-07
ENSG00000121858	TNFSF10	protein_coding	4699.8	0.521438	5.93835	2.87913e-09	3.0667e-07
ENSG00000087903	RFX2	protein_coding	702.058	0.752141	5.92803	3.06584e-09	3.21755e-07
ENSG00000135114	OASL	protein_coding	1289.88	0.569721	5.92812	3.06429e-09	3.21755e-07
ENSG00000103381	CPPED1	protein_coding	14038	0.717779	5.91805	3.25777e-09	3.39403e-07
ENSG00000120727	PAIP2	protein_coding	3790.78	0.440903	5.90826	3.4574e-09	3.5759e-07
ENSG00000225873	LINC00694	protein_coding	560.663	1.14392	5.90678	3.48849e-09	3.58211e-07
ENSG00000071967	CYBRD1	protein_coding	1055.74	0.594629	5.9039	3.55009e-09	3.60398e-07
ENSG00000185905	C16orf54	protein_coding	7893.59	0.653248	5.90343	3.5603e-09	3.60398e-07
ENSG00000143878	RHOB	protein_coding	4266.27	0.794282	5.89234	3.80769e-09	3.82726e-07
ENSG00000139112	GABARAPL1	protein_coding	2336.28	0.826588	5.86433	4.50959e-09	4.50108e-07
ENSG00000172508	CARNS1	protein_coding	227.989	-0.813961	-5.84762	4.98654e-09	4.90847e-07
ENSG00000184602	SNN	protein_coding	7401.84	0.728796	5.84863	4.95648e-09	4.90847e-07
ENSG00000125538	IL1B	protein_coding	1779.16	0.661943	5.82726	5.63453e-09	5.4993e-07
ENSG00000135365	PHF21A	protein_coding	2856.72	0.683881	5.82639	5.66382e-09	5.4993e-07
ENSG00000158373	HIST1H2BD	protein_coding	229.335	0.948046	5.81851	5.93734e-09	5.72592e-07
ENSG00000110422	HIPK3	protein_coding	2636.78	0.549055	5.81024	6.23845e-09	5.97593e-07
ENSG00000136877	FPGS	protein_coding	585.082	-0.652899	-5.80766	6.33513e-09	5.9988e-07
ENSG00000165271	NOL6	protein_coding	677.892	-0.584842	-5.80736	6.34639e-09	5.9988e-07
ENSG00000090060	PAPOLA	protein_coding	3486.16	0.434388	5.79203	6.95409e-09	6.48373e-07
ENSG00000138678	GPAT3	protein_coding	1279.85	0.996596	5.79103	6.99569e-09	6.48373e-07
ENSG00000149557	FEZ1	protein_coding	78.2156	-1.45493	-5.79187	6.96058e-09	6.48373e-07
ENSG00000123358	NR4A1	protein_coding	256.716	0.728292	5.78897	7.08186e-09	6.52126e-07
ENSG00000176845	METRNL	protein_coding	1621.95	0.707559	5.77852	7.53587e-09	6.89484e-07
ENSG00000130066	SAT1	protein_coding	9211.96	0.612063	5.77561	7.66756e-09	6.97064e-07
ENSG00000167996	FTH1	protein_coding	111068	0.507035	5.77402	7.7403e-09	6.99224e-07
ENSG00000008853	RHOBTB2	protein_coding	336.863	-0.728999	-5.76836	8.00444e-09	7.18537e-07
ENSG00000123689	G0S2	protein_coding	106.557	1.5694	5.76068	8.37752e-09	7.47327e-07
ENSG00000118260	CREB1	protein_coding	1586.45	0.520042	5.7268	1.02344e-08	9.073e-07
ENSG00000141736	ERBB2	protein_coding	262.589	-0.88095	-5.70727	1.14804e-08	1.01148e-06
ENSG00000137312	FLOT1	protein_coding	6942.42	0.671388	5.69113	1.262e-08	1.10368e-06
ENSG00000165029	ABCA1	protein_coding	692.677	0.816143	5.6903	1.26816e-08	1.10368e-06
ENSG00000154734	ADAMTS1	protein_coding	65.7871	-1.26693	-5.68805	1.28499e-08	1.11156e-06
ENSG00000136371	MTHFS	protein_coding	1109.95	0.69462	5.68103	1.33885e-08	1.15117e-06
ENSG00000166166	TRMT61A	protein_coding	273.104	-0.647338	-5.67304	1.40289e-08	1.19901e-06
ENSG00000011198	ABHD5	protein_coding	2018.21	0.916051	5.6697	1.43048e-08	1.20812e-06
ENSG00000065154	OAT	protein_coding	834.45	0.426251	5.67028	1.42566e-08	1.20812e-06
ENSG00000101084	C20orf24	protein_coding	3334.23	0.599587	5.6674	1.44977e-08	1.21721e-06
ENSG00000134539	KLRD1	protein_coding	1478.07	-0.770339	-5.65249	1.58136e-08	1.31992e-06
ENSG00000102524	TNFSF13B	protein_coding	1534.58	0.514557	5.64821	1.62129e-08	1.34539e-06
ENSG00000122694	GLIPR2	protein_coding	6968.79	0.532102	5.64275	1.67351e-08	1.38069e-06
ENSG00000160179	ABCG1	protein_coding	1243.14	0.943329	5.6352	1.74856e-08	1.43432e-06
ENSG00000173083	HPSE	protein_coding	970.437	0.499053	5.63364	1.76443e-08	1.43907e-06
ENSG00000135823	STX6	protein_coding	1083.51	0.491169	5.61894	1.92135e-08	1.55815e-06
ENSG00000257743	MGAM2	protein_coding	103.399	1.6302	5.61487	1.96708e-08	1.58622e-06
ENSG00000026652	AGPAT4	protein_coding	161.658	0.800241	5.6018	2.12133e-08	1.69537e-06
ENSG00000260078	RP11-44F14.1	transcribed_unprocessed_pseudogene	430.249	0.681422	5.60141	2.1262e-08	1.69537e-06
ENSG00000144228	SPOPL	protein_coding	1302.63	0.665444	5.58811	2.29548e-08	1.82019e-06
ENSG00000145491	ROPN1L	protein_coding	297.828	0.951938	5.58404	2.34991e-08	1.85305e-06
ENSG00000215301	DDX3X	protein_coding	9979.44	0.528302	5.58275	2.36751e-08	1.85667e-06
ENSG00000197208	SLC22A4	protein_coding	468.953	0.845685	5.57758	2.43886e-08	1.90218e-06
ENSG00000092841	MYL6	protein_coding	20484.9	0.39724	5.56897	2.56247e-08	1.98773e-06
ENSG00000102445	RUBCNL	protein_coding	2065.91	1.0293	5.56593	2.60754e-08	2.01175e-06
ENSG00000113742	CPEB4	protein_coding	1075.33	0.689001	5.56233	2.66197e-08	2.0427e-06
ENSG00000112299	VNN1	protein_coding	544.73	0.762252	5.5539	2.79365e-08	2.13228e-06
ENSG00000106780	MEGF9	protein_coding	10560.2	0.851837	5.54734	2.90052e-08	2.20208e-06
ENSG00000176386	CDC26	protein_coding	608.165	0.457584	5.54366	2.96216e-08	2.23698e-06
ENSG00000104450	SPAG1	protein_coding	122.2	0.859429	5.5413	3.00239e-08	2.24362e-06
ENSG00000163235	TGFA	protein_coding	759.57	0.965949	5.54155	2.99804e-08	2.24362e-06
ENSG00000111885	MAN1A1	protein_coding	1576.94	0.525814	5.53256	3.15598e-08	2.34611e-06
ENSG00000160588	MPZL3	protein_coding	2625.97	0.854857	5.51865	3.41607e-08	2.51877e-06
ENSG00000198189	HSD17B11	protein_coding	4215.99	0.602246	5.51737	3.44118e-08	2.51877e-06
ENSG00000235750	KIAA0040	protein_coding	5329.78	0.535115	5.51791	3.43053e-08	2.51877e-06
ENSG00000073756	PTGS2	protein_coding	893.415	0.730013	5.51307	3.52632e-08	2.56792e-06
ENSG00000163635	ATXN7	protein_coding	1417.92	0.637106	5.5094	3.60051e-08	2.60863e-06
ENSG00000132965	ALOX5AP	protein_coding	8028.61	1.01023	5.50288	3.73643e-08	2.69344e-06
ENSG00000123609	NMI	protein_coding	1921.76	0.502446	5.49811	3.83878e-08	2.75331e-06
ENSG00000129292	PHF20L1	protein_coding	1632.82	0.541591	5.497	3.86307e-08	2.75688e-06
ENSG00000166046	TCP11L2	protein_coding	1051.5	0.723934	5.49444	3.91955e-08	2.78327e-06
ENSG00000115271	GCA	protein_coding	9489.35	0.667659	5.48419	4.15367e-08	2.92046e-06
ENSG00000123405	NFE2	protein_coding	7530.65	0.950409	5.48469	4.14187e-08	2.92046e-06
ENSG00000100385	IL2RB	protein_coding	4823.62	-0.708196	-5.48043	4.24294e-08	2.9686e-06
ENSG00000113916	BCL6	protein_coding	8818.2	1.03889	5.47603	4.34977e-08	3.0138e-06
ENSG00000175538	KCNE3	protein_coding	3412.74	0.668598	5.47636	4.34158e-08	3.0138e-06
ENSG00000103569	AQP9	protein_coding	21179.9	0.866024	5.47389	4.4026e-08	3.03567e-06
ENSG00000057704	TMCC3	protein_coding	2592.24	0.854562	5.47078	4.48059e-08	3.07459e-06
ENSG00000185338	SOCS1	protein_coding	186.724	-0.643767	-5.46835	4.54246e-08	3.10213e-06
ENSG00000080371	RAB21	protein_coding	1329.22	0.415503	5.46648	4.5906e-08	3.12008e-06
ENSG00000164104	HMGB2	protein_coding	4098.32	0.552097	5.46476	4.63533e-08	3.12146e-06
ENSG00000205336	ADGRG1	protein_coding	2382.37	-0.858309	-5.46472	4.63637e-08	3.12146e-06
ENSG00000163412	EIF4E3	protein_coding	2111.94	0.485911	5.46377	4.66116e-08	3.12342e-06
ENSG00000176788	BASP1	protein_coding	11556.2	0.795208	5.44897	5.06631e-08	3.37583e-06
ENSG00000186431	FCAR	protein_coding	1059.15	1.0326	5.44831	5.08515e-08	3.37583e-06
ENSG00000158869	FCER1G	protein_coding	5998.85	0.446924	5.43779	5.39454e-08	3.56464e-06
ENSG00000211898	IGHD	IG_C_gene	1928.57	-0.656161	-5.43354	5.52461e-08	3.63377e-06
ENSG00000166439	RNF169	protein_coding	1041.15	0.511302	5.43168	5.58248e-08	3.65499e-06
ENSG00000174574	AKIRIN1	protein_coding	2236.87	0.399254	5.42969	5.64509e-08	3.6791e-06
ENSG00000084234	APLP2	protein_coding	13534.2	0.586965	5.42259	5.8742e-08	3.81102e-06
ENSG00000137509	PRCP	protein_coding	3434.12	0.570864	5.41459	6.14298e-08	3.96736e-06
ENSG00000120694	HSPH1	protein_coding	831.111	0.457899	5.40711	6.40487e-08	4.11787e-06
ENSG00000204389	HSPA1A	protein_coding	14022.8	0.889891	5.40597	6.44578e-08	4.12559e-06
ENSG00000140090	SLC24A4	protein_coding	702.044	0.578489	5.39808	6.73579e-08	4.29196e-06
ENSG00000078804	TP53INP2	protein_coding	866.695	0.960442	5.39648	6.79607e-08	4.30357e-06
ENSG00000171596	NMUR1	protein_coding	203.63	-1.0349	-5.396	6.81431e-08	4.30357e-06
ENSG00000136630	HLX	protein_coding	1771.29	0.965398	5.37875	7.50041e-08	4.69532e-06
ENSG00000170837	GPR27	protein_coding	939.235	0.849412	5.37896	7.49187e-08	4.69532e-06
ENSG00000101474	APMAP	protein_coding	6472.24	0.623813	5.36946	7.89744e-08	4.91452e-06
ENSG00000109332	UBE2D3	protein_coding	7787.23	0.483575	5.36895	7.91942e-08	4.91452e-06
ENSG00000127124	HIVEP3	protein_coding	333.5	-0.744548	-5.3619	8.23518e-08	5.08834e-06
ENSG00000091317	CMTM6	protein_coding	7262.01	0.548561	5.35691	8.4658e-08	5.18138e-06
ENSG00000133703	KRAS	protein_coding	1081.84	0.48954	5.35638	8.49082e-08	5.18138e-06
ENSG00000158769	F11R	protein_coding	4624.71	0.7717	5.35629	8.49467e-08	5.18138e-06
ENSG00000168056	LTBP3	protein_coding	1126.36	-0.475574	-5.35323	8.64003e-08	5.24762e-06
ENSG00000120594	PLXDC2	protein_coding	2075.05	0.709779	5.34638	8.97329e-08	5.42694e-06
ENSG00000167193	CRK	protein_coding	1120.95	0.534933	5.34548	9.01783e-08	5.43087e-06
ENSG00000167716	WDR81	protein_coding	1255.76	-0.418811	-5.34446	9.06881e-08	5.43862e-06
ENSG00000163162	RNF149	protein_coding	9683.61	0.57234	5.34244	9.17054e-08	5.47662e-06
ENSG00000108244	KRT23	protein_coding	3481.97	0.718897	5.33671	9.46507e-08	5.62896e-06
ENSG00000101972	STAG2	protein_coding	3496.23	0.487081	5.33587	9.50851e-08	5.63133e-06
ENSG00000116679	IVNS1ABP	protein_coding	4538.03	0.663947	5.33385	9.61521e-08	5.67099e-06
ENSG00000059728	MXD1	protein_coding	18829.4	0.965778	5.33136	9.74777e-08	5.72551e-06
ENSG00000100644	HIF1A	protein_coding	3049.62	0.768224	5.32724	9.97147e-08	5.8329e-06
ENSG00000144848	ATG3	protein_coding	2655.4	0.388564	5.32072	1.0336e-07	6.02144e-06
ENSG00000080815	PSEN1	protein_coding	3480.87	0.500158	5.31753	1.05182e-07	6.10272e-06
ENSG00000092199	HNRNPC	protein_coding	12663.8	0.353198	5.31399	1.07249e-07	6.19743e-06
ENSG00000179833	SERTAD2	protein_coding	1186.14	0.500528	5.30753	1.1112e-07	6.39522e-06
ENSG00000111837	MAK	protein_coding	231.758	0.760919	5.30526	1.12515e-07	6.44949e-06
ENSG00000132581	SDF2	protein_coding	1263.79	0.443284	5.29793	1.17125e-07	6.68691e-06
ENSG00000140575	IQGAP1	protein_coding	16940.6	0.608152	5.29274	1.205e-07	6.85218e-06
ENSG00000119801	YPEL5	protein_coding	3432.59	0.477279	5.28537	1.2545e-07	7.10534e-06
ENSG00000188895	MSL1	protein_coding	10409.2	0.793917	5.28281	1.27216e-07	7.17687e-06
ENSG00000182782	HCAR2	protein_coding	2562.11	0.799083	5.28033	1.28949e-07	7.24601e-06
ENSG00000144118	RALB	protein_coding	5384.97	0.621743	5.27477	1.32924e-07	7.44011e-06
ENSG00000146859	TMEM140	protein_coding	4628.94	0.775616	5.27044	1.36094e-07	7.58776e-06
ENSG00000135821	GLUL	protein_coding	21254.6	0.687653	5.26748	1.38308e-07	7.68122e-06
ENSG00000267174	CTC-510F12.4	3prime_overlapping_ncRNA	531.629	0.675335	5.2597	1.44289e-07	7.98229e-06
ENSG00000108582	CPD	protein_coding	4141.81	0.808025	5.24528	1.56042e-07	8.59919e-06
ENSG00000026508	CD44	protein_coding	10793	0.412985	5.23841	1.61964e-07	8.8912e-06
ENSG00000113580	NR3C1	protein_coding	2966.84	0.452002	5.2366	1.63562e-07	8.94451e-06
ENSG00000173535	TNFRSF10C	protein_coding	14734.7	0.853555	5.23266	1.67085e-07	9.10229e-06
ENSG00000123684	LPGAT1	protein_coding	3245.52	0.537796	5.23118	1.68434e-07	9.1409e-06
ENSG00000072952	MRVI1	protein_coding	1897.8	0.769306	5.22967	1.69815e-07	9.18092e-06
ENSG00000093134	VNN3	protein_coding	1310.71	1.016	5.21971	1.79203e-07	9.61564e-06
ENSG00000185340	GAS2L1	protein_coding	556.821	0.559862	5.21999	1.7893e-07	9.61564e-06
ENSG00000109381	ELF2	protein_coding	1187.85	0.487617	5.21637	1.82461e-07	9.75381e-06
ENSG00000135870	RC3H1	protein_coding	1217.85	0.612537	5.20726	1.91647e-07	1.02066e-05
ENSG00000105374	NKG7	protein_coding	6996.41	-0.732244	-5.20077	1.98468e-07	1.05306e-05
ENSG00000135048	TMEM2	protein_coding	2365.37	0.519735	5.19976	1.9955e-07	1.05488e-05
ENSG00000148572	NRBF2	protein_coding	3252.76	0.716753	5.19727	2.02237e-07	1.06514e-05
ENSG00000140848	CPNE2	protein_coding	959.618	0.62437	5.19473	2.05013e-07	1.07579e-05
ENSG00000079385	CEACAM1	protein_coding	818.066	0.849683	5.17909	2.2297e-07	1.16573e-05
ENSG00000215114	UBXN2B	protein_coding	1907.28	0.73274	5.17805	2.24219e-07	1.16798e-05
ENSG00000116962	NID1	protein_coding	277.296	-0.794443	-5.17359	2.29641e-07	1.19188e-05
ENSG00000131759	RARA	protein_coding	6686.9	0.779124	5.17248	2.31002e-07	1.1946e-05
ENSG00000123505	AMD1	protein_coding	2754.9	0.58719	5.17041	2.33578e-07	1.20109e-05
ENSG00000244165	P2RY11	protein_coding	243.596	-0.750872	-5.17012	2.33941e-07	1.20109e-05
ENSG00000143546	S100A8	protein_coding	66334.3	0.672629	5.16901	2.35331e-07	1.2039e-05
ENSG00000165288	BRWD3	protein_coding	1093.91	0.654178	5.16668	2.38291e-07	1.21469e-05
ENSG00000198624	CCDC69	protein_coding	5097.02	0.321846	5.15497	2.53676e-07	1.28851e-05
ENSG00000173171	MTX1	protein_coding	1173.98	0.598026	5.15046	2.59853e-07	1.31521e-05
ENSG00000044574	HSPA5	protein_coding	7372	0.314638	5.14541	2.66938e-07	1.34629e-05
ENSG00000211829	TRDC	TR_C_gene	878.222	-0.64599	-5.14308	2.70268e-07	1.35829e-05
ENSG00000106714	CNTNAP3	protein_coding	693.736	0.800573	5.14134	2.7278e-07	1.36133e-05
ENSG00000156671	SAMD8	protein_coding	582.584	0.628779	5.14154	2.72495e-07	1.36133e-05
ENSG00000120306	CYSTM1	protein_coding	1210.86	0.608612	5.13863	2.76747e-07	1.37153e-05
ENSG00000171049	FPR2	protein_coding	8748.86	0.868675	5.13918	2.75936e-07	1.37153e-05
ENSG00000067840	PDZD4	protein_coding	679.145	-0.642029	-5.13725	2.78794e-07	1.3769e-05
ENSG00000136026	CKAP4	protein_coding	2783.1	0.701957	5.1363	2.80202e-07	1.37908e-05
ENSG00000172543	CTSW	protein_coding	3709.18	-0.622769	-5.13547	2.81446e-07	1.38044e-05
ENSG00000155629	PIK3AP1	protein_coding	4444.65	0.4311	5.12775	2.93219e-07	1.43174e-05
ENSG00000182117	NOP10	protein_coding	2714.63	0.472605	5.12731	2.93912e-07	1.43174e-05
ENSG00000105835	NAMPT	protein_coding	47883.8	0.77094	5.12473	2.97958e-07	1.44652e-05
ENSG00000132382	MYBBP1A	protein_coding	625.092	-0.538966	-5.11752	3.09584e-07	1.49786e-05
ENSG00000120868	APAF1	protein_coding	3022.57	0.713539	5.11353	3.16194e-07	1.52468e-05
ENSG00000116729	WLS	protein_coding	2207.25	0.774609	5.11235	3.18181e-07	1.52909e-05
ENSG00000165006	UBAP1	protein_coding	3249.34	0.572433	5.11045	3.21393e-07	1.53543e-05
ENSG00000197971	MBP	protein_coding	10526.6	0.482722	5.1103	3.21651e-07	1.53543e-05
ENSG00000110104	CCDC86	protein_coding	218.462	-0.658761	-5.10726	3.26865e-07	1.54995e-05
ENSG00000134996	OSTF1	protein_coding	3317.95	0.465635	5.10751	3.26435e-07	1.54995e-05
ENSG00000153395	LPCAT1	protein_coding	5134.28	0.371385	5.10549	3.29942e-07	1.55936e-05
ENSG00000071054	MAP4K4	protein_coding	5905.05	0.681372	5.10353	3.33369e-07	1.57035e-05
ENSG00000075420	FNDC3B	protein_coding	1309.31	0.708101	5.10261	3.34996e-07	1.57283e-05
ENSG00000068366	ACSL4	protein_coding	1619.96	0.556414	5.09877	3.41863e-07	1.5998e-05
ENSG00000153922	CHD1	protein_coding	1250.92	0.45608	5.09337	3.51762e-07	1.64075e-05
ENSG00000103194	USP10	protein_coding	3901.51	0.615784	5.0857	3.66279e-07	1.7029e-05
ENSG00000113369	ARRDC3	protein_coding	3678.37	0.568505	5.07656	3.8432e-07	1.78097e-05
ENSG00000096746	HNRNPH3	protein_coding	2476.36	0.414498	5.07338	3.90803e-07	1.80515e-05
ENSG00000204388	HSPA1B	protein_coding	1275.17	0.745063	5.06965	3.98546e-07	1.83498e-05
ENSG00000173281	PPP1R3B	protein_coding	3356.68	0.844441	5.06703	4.04079e-07	1.85448e-05
ENSG00000113163	COL4A3BP	protein_coding	1327.07	0.46017	5.06369	4.11229e-07	1.87164e-05
ENSG00000171988	JMJD1C	protein_coding	3995.77	0.6619	5.06398	4.10586e-07	1.87164e-05
ENSG00000179818	PCBP1-AS1	processed_transcript	651.626	0.604956	5.06344	4.11752e-07	1.87164e-05
ENSG00000171476	HOPX	protein_coding	598.402	-0.812303	-5.06208	4.14706e-07	1.87908e-05
ENSG00000138594	TMOD3	protein_coding	1618.03	0.416623	5.05382	4.33056e-07	1.95512e-05
ENSG00000160209	PDXK	protein_coding	1987.49	0.496782	5.05331	4.34229e-07	1.95512e-05
ENSG00000171223	JUNB	protein_coding	9963.89	0.600982	5.05066	4.40283e-07	1.97615e-05
ENSG00000163191	S100A11	protein_coding	27694.4	0.647105	5.04376	4.5647e-07	2.04238e-05
ENSG00000175866	BAIAP2	protein_coding	249.338	0.639309	5.03775	4.71048e-07	2.10102e-05
ENSG00000121316	PLBD1	protein_coding	6237.25	0.585682	5.03686	4.73224e-07	2.10415e-05
ENSG00000105516	DBP	protein_coding	683.51	-0.495059	-5.03472	4.78551e-07	2.12123e-05
ENSG00000136826	KLF4	protein_coding	665.243	0.578233	5.03403	4.80277e-07	2.12229e-05
ENSG00000206561	COLQ	protein_coding	152.798	-0.650798	-5.0321	4.85133e-07	2.13713e-05
ENSG00000136869	TLR4	protein_coding	4808.92	0.726356	5.02987	4.90804e-07	2.15546e-05
ENSG00000044115	CTNNA1	protein_coding	2031.22	0.42136	5.02821	4.95074e-07	2.16755e-05
ENSG00000161638	ITGA5	protein_coding	7415.7	0.681142	5.02433	5.05205e-07	2.20513e-05
ENSG00000182253	SYNM	protein_coding	100.408	1.13986	5.02303	5.08614e-07	2.21324e-05
ENSG00000203747	FCGR3A	protein_coding	20304.8	0.549431	5.00709	5.52598e-07	2.39733e-05
ENSG00000182541	LIMK2	protein_coding	5068.14	0.711455	5.00486	5.59012e-07	2.41781e-05
ENSG00000136603	SKIL	protein_coding	250.811	0.609192	4.99638	5.84165e-07	2.51897e-05
ENSG00000133067	LGR6	protein_coding	153.76	-0.824293	-4.98985	6.04263e-07	2.59778e-05
ENSG00000104093	DMXL2	protein_coding	1323.9	0.515158	4.98839	6.0885e-07	2.60965e-05
ENSG00000124788	ATXN1	protein_coding	1371.77	0.531831	4.98137	6.31352e-07	2.68994e-05
ENSG00000224152	AC009506.1	antisense	686.069	0.771097	4.98182	6.29887e-07	2.68994e-05
ENSG00000159882	ZNF230	protein_coding	449.588	0.556807	4.98022	6.35124e-07	2.69796e-05
ENSG00000140105	WARS	protein_coding	5555.33	0.43575	4.97559	6.50484e-07	2.755e-05
ENSG00000070423	RNF126	protein_coding	1175.72	-0.407199	-4.97189	6.6302e-07	2.78567e-05
ENSG00000148110	MFSD14B	protein_coding	1836.25	0.476874	4.97267	6.60386e-07	2.78567e-05
ENSG00000162408	NOL9	protein_coding	354.884	-0.509076	-4.97173	6.6358e-07	2.78567e-05
ENSG00000166579	NDEL1	protein_coding	4398.99	0.713468	4.9707	6.67123e-07	2.79233e-05
ENSG00000111348	ARHGDIB	protein_coding	45473.1	0.377829	4.96694	6.8019e-07	2.82853e-05
ENSG00000113303	BTNL8	protein_coding	892.655	0.8048	4.9665	6.81716e-07	2.82853e-05
ENSG00000149269	PAK1	protein_coding	7590.21	0.730594	4.96681	6.80643e-07	2.82853e-05
ENSG00000135932	CAB39	protein_coding	4505.23	0.476379	4.96494	6.87222e-07	2.84311e-05
ENSG00000210082	MT-RNR2	Mt_rRNA	175525	0.485798	4.96214	6.97209e-07	2.87609e-05
ENSG00000142405	NLRP12	protein_coding	2940.57	0.80388	4.95631	7.18455e-07	2.95519e-05
ENSG00000106052	TAX1BP1	protein_coding	2871.17	0.387597	4.95193	7.34798e-07	3.01373e-05
ENSG00000154188	ANGPT1	protein_coding	132.439	1.18784	4.94939	7.44453e-07	3.04458e-05
ENSG00000143167	GPA33	protein_coding	261.164	-0.678643	-4.94198	7.73341e-07	3.15369e-05
ENSG00000255398	HCAR3	protein_coding	3270.86	0.713647	4.9408	7.78029e-07	3.16376e-05
ENSG00000163625	WDFY3	protein_coding	1899.12	0.82349	4.93281	8.10551e-07	3.28664e-05
ENSG00000108256	NUFIP2	protein_coding	2009.06	0.503685	4.93108	8.17759e-07	3.30648e-05
ENSG00000211445	GPX3	protein_coding	243.737	1.02502	4.92379	8.48819e-07	3.42237e-05
ENSG00000075785	RAB7A	protein_coding	10938.8	0.513851	4.91957	8.67348e-07	3.47743e-05
ENSG00000172460	PRSS30P	processed_transcript	67.5423	-1.42089	-4.91972	8.66683e-07	3.47743e-05
ENSG00000099899	TRMT2A	protein_coding	771.548	-0.433075	-4.91762	8.76032e-07	3.50241e-05
ENSG00000157551	KCNJ15	protein_coding	5543.18	0.862175	4.91363	8.94075e-07	3.56456e-05
ENSG00000096063	SRPK1	protein_coding	1641.15	0.539095	4.91167	9.03028e-07	3.59023e-05
ENSG00000145860	RNF145	protein_coding	2741.12	0.490674	4.91112	9.05581e-07	3.59038e-05
ENSG00000125520	SLC2A4RG	protein_coding	1124.55	-0.419749	-4.90634	9.27904e-07	3.65856e-05
ENSG00000135678	CPM	protein_coding	147.679	0.719326	4.90674	9.26032e-07	3.65856e-05
ENSG00000146592	CREB5	protein_coding	3059.02	0.829781	4.90116	9.52702e-07	3.73569e-05
ENSG00000147526	TACC1	protein_coding	3370.41	0.482516	4.90157	9.5075e-07	3.73569e-05
ENSG00000174007	CEP19	protein_coding	1213.15	0.67256	4.90048	9.56025e-07	3.73845e-05
ENSG00000165650	PDZD8	protein_coding	742.967	0.6347	4.89593	9.78435e-07	3.81563e-05
ENSG00000140968	IRF8	protein_coding	2230.42	-0.443181	-4.88417	1.03868e-06	4.03023e-05
ENSG00000143815	LBR	protein_coding	5563.29	0.671432	4.88355	1.04193e-06	4.03023e-05
ENSG00000185728	YTHDF3	protein_coding	1309.53	0.441684	4.88365	1.04138e-06	4.03023e-05
ENSG00000091106	NLRC4	protein_coding	928.689	0.516456	4.88233	1.04839e-06	4.04422e-05
ENSG00000198900	TOP1	protein_coding	2603.16	0.44926	4.88008	1.06044e-06	4.07968e-05
ENSG00000163221	S100A12	protein_coding	5519.41	0.77677	4.87755	1.07409e-06	4.1211e-05
ENSG00000132002	DNAJB1	protein_coding	2943.66	0.399271	4.87683	1.07804e-06	4.12515e-05
ENSG00000150457	LATS2	protein_coding	476.571	0.577823	4.87033	1.11411e-06	4.25179e-05
ENSG00000198961	PJA2	protein_coding	3515.05	0.471421	4.8692	1.12053e-06	4.26489e-05
ENSG00000172216	CEBPB	protein_coding	9559.58	0.568574	4.86263	1.15838e-06	4.39723e-05
ENSG00000007264	MATK	protein_coding	1280.92	-0.59784	-4.86015	1.17295e-06	4.44071e-05
ENSG00000164850	GPER1	protein_coding	41.5982	-1.32651	-4.85746	1.18902e-06	4.48966e-05
ENSG00000180871	CXCR2	protein_coding	45592.9	0.780023	4.8532	1.21485e-06	4.5751e-05
ENSG00000197579	TOPORS	protein_coding	1363.39	0.666761	4.84458	1.26881e-06	4.76572e-05
ENSG00000109756	RAPGEF2	protein_coding	1724.65	0.573022	4.84202	1.28523e-06	4.81472e-05
ENSG00000065135	GNAI3	protein_coding	2485.08	0.375027	4.83988	1.29917e-06	4.85421e-05
ENSG00000173334	TRIB1	protein_coding	1087.64	0.713793	4.83713	1.31729e-06	4.90904e-05
ENSG00000115919	KYNU	protein_coding	475.426	0.817754	4.81872	1.44484e-06	5.37037e-05
ENSG00000007376	RPUSD1	protein_coding	524.086	-0.424582	-4.81383	1.48062e-06	5.48906e-05
ENSG00000168214	RBPJ	protein_coding	1906.54	0.493063	4.80999	1.50939e-06	5.58122e-05
ENSG00000102580	DNAJC3	protein_coding	1664.61	0.505995	4.80867	1.5194e-06	5.60245e-05
ENSG00000180061	TMEM150B	protein_coding	103.385	0.837272	4.8082	1.52298e-06	5.60245e-05
ENSG00000157514	TSC22D3	protein_coding	32949.1	0.565829	4.80749	1.52835e-06	5.60774e-05
ENSG00000158156	XKR8	protein_coding	2603.89	0.667266	4.80648	1.53612e-06	5.6218e-05
ENSG00000062716	VMP1	protein_coding	11541	0.57803	4.80576	1.54169e-06	5.62187e-05
ENSG00000163346	PBXIP1	protein_coding	10706.3	0.423541	4.80494	1.54795e-06	5.62187e-05
ENSG00000189159	HN1	protein_coding	2911.09	0.454524	4.80497	1.54773e-06	5.62187e-05
ENSG00000160214	RRP1	protein_coding	265.604	-0.548576	-4.80213	1.56989e-06	5.68706e-05
ENSG00000143933	CALM2	protein_coding	8046.74	0.337445	4.79847	1.59879e-06	5.77708e-05
ENSG00000188215	DCUN1D3	protein_coding	184.023	0.592169	4.79139	1.65628e-06	5.96973e-05
ENSG00000103056	SMPD3	protein_coding	327.46	-0.68761	-4.79017	1.66638e-06	5.97612e-05
ENSG00000198898	CAPZA2	protein_coding	2540.92	0.470422	4.79017	1.66643e-06	5.97612e-05
ENSG00000168297	PXK	protein_coding	1037.59	0.585915	4.78682	1.69447e-06	6.06146e-05
ENSG00000167613	LAIR1	protein_coding	1703.9	-0.477984	-4.78575	1.70349e-06	6.07847e-05
ENSG00000143363	PRUNE1	protein_coding	1002.22	0.422955	4.78198	1.73579e-06	6.16291e-05
ENSG00000265666	RARA-AS1	antisense	433.733	0.684839	4.78204	1.73521e-06	6.16291e-05
ENSG00000107341	UBE2R2	protein_coding	4604.13	0.515127	4.78101	1.74414e-06	6.17357e-05
ENSG00000138411	HECW2	protein_coding	175.348	1.01743	4.78063	1.74744e-06	6.17357e-05
ENSG00000103227	LMF1	protein_coding	135.829	-0.759454	-4.77778	1.77239e-06	6.24626e-05
ENSG00000148926	ADM	protein_coding	1353.76	0.894672	4.77545	1.79302e-06	6.30338e-05
ENSG00000100266	PACSIN2	protein_coding	5052.65	0.608408	4.7734	1.81138e-06	6.33671e-05
ENSG00000181826	RELL1	protein_coding	356.514	0.691712	4.77363	1.80937e-06	6.33671e-05
ENSG00000203896	LIME1	protein_coding	1973.66	-0.482879	-4.77048	1.83784e-06	6.41357e-05
ENSG00000117862	TXNDC12	protein_coding	1924.49	0.34001	4.76595	1.87965e-06	6.53644e-05
ENSG00000163736	PPBP	protein_coding	3678.06	0.52821	4.76568	1.88221e-06	6.53644e-05
ENSG00000197540	GZMM	protein_coding	1439.7	-0.567624	-4.76126	1.92392e-06	6.66507e-05
ENSG00000132386	SERPINF1	protein_coding	186.639	-0.654912	-4.75827	1.95259e-06	6.74803e-05
ENSG00000237298	TTN-AS1	antisense	293.486	0.687921	4.75564	1.97817e-06	6.8199e-05
ENSG00000081320	STK17B	protein_coding	5383.61	0.431673	4.75507	1.98376e-06	6.82268e-05
ENSG00000163464	CXCR1	protein_coding	32701.2	0.75519	4.74384	2.09707e-06	7.19507e-05
ENSG00000100591	AHSA1	protein_coding	1566.21	0.341602	4.74062	2.13065e-06	7.29274e-05
ENSG00000007944	MYLIP	protein_coding	1867.12	0.505246	4.73922	2.14544e-06	7.3258e-05
ENSG00000197405	C5AR1	protein_coding	17102.2	0.724884	4.73827	2.15552e-06	7.34265e-05
ENSG00000150990	DHX37	protein_coding	493.221	-0.463177	-4.73508	2.18966e-06	7.44119e-05
ENSG00000230257	NFE4	protein_coding	423.039	0.787644	4.73336	2.2083e-06	7.48672e-05
ENSG00000070831	CDC42	protein_coding	9609.84	0.337626	4.72993	2.24592e-06	7.59622e-05
ENSG00000090382	LYZ	protein_coding	81081.4	0.530505	4.7262	2.28762e-06	7.71897e-05
ENSG00000135766	EGLN1	protein_coding	3932.65	0.606561	4.72436	2.30846e-06	7.7709e-05
ENSG00000137124	ALDH1B1	protein_coding	105.759	-0.75381	-4.72242	2.33054e-06	7.82676e-05
ENSG00000140332	TLE3	protein_coding	9401.65	0.711874	4.7198	2.36076e-06	7.90967e-05
ENSG00000109854	HTATIP2	protein_coding	1154.97	0.453949	4.71711	2.39213e-06	7.95871e-05
ENSG00000164548	TRA2A	protein_coding	1023.67	0.400435	4.71749	2.3877e-06	7.95871e-05
ENSG00000213390	ARHGAP19	protein_coding	988.78	0.470999	4.7174	2.38874e-06	7.95871e-05
ENSG00000163041	H3F3A	protein_coding	42595.3	0.515616	4.71429	2.4256e-06	8.05131e-05
ENSG00000181035	SLC25A42	protein_coding	476.514	-0.48135	-4.71266	2.44507e-06	8.09709e-05
ENSG00000188786	MTF1	protein_coding	1128.27	0.5407	4.71204	2.45246e-06	8.10277e-05
ENSG00000067182	TNFRSF1A	protein_coding	11126.6	0.615457	4.71017	2.47516e-06	8.15888e-05
ENSG00000182220	ATP6AP2	protein_coding	2932.01	0.362456	4.70802	2.50141e-06	8.2264e-05
ENSG00000111249	CUX2	protein_coding	38.274	-1.20833	-4.70693	2.51472e-06	8.25116e-05
ENSG00000102393	GLA	protein_coding	471.733	0.501585	4.7044	2.54614e-06	8.33386e-05
ENSG00000137575	SDCBP	protein_coding	15627.2	0.642224	4.70388	2.55268e-06	8.33386e-05
ENSG00000154447	SH3RF1	protein_coding	72.6819	-1.03093	-4.70303	2.56328e-06	8.33386e-05
ENSG00000157600	TMEM164	protein_coding	5658.48	0.632655	4.70333	2.55947e-06	8.33386e-05
ENSG00000110077	MS4A6A	protein_coding	2901.71	0.559957	4.69999	2.60173e-06	8.42671e-05
ENSG00000124491	F13A1	protein_coding	4421.84	0.428132	4.69984	2.60364e-06	8.42671e-05
ENSG00000083168	KAT6A	protein_coding	3679.3	0.453645	4.69641	2.6477e-06	8.53087e-05
ENSG00000143226	FCGR2A	protein_coding	19906.4	0.648446	4.69641	2.64778e-06	8.53087e-05
ENSG00000198814	GK	protein_coding	1220.24	0.540433	4.692	2.70543e-06	8.69697e-05
ENSG00000151694	ADAM17	protein_coding	846.229	0.488426	4.69085	2.72074e-06	8.70697e-05
ENSG00000161533	ACOX1	protein_coding	3333.17	0.717758	4.69124	2.71551e-06	8.70697e-05
ENSG00000184588	PDE4B	protein_coding	2283.9	0.580305	4.68517	2.79732e-06	8.93201e-05
ENSG00000188921	HACD4	protein_coding	1726.16	0.528271	4.68236	2.83594e-06	9.03514e-05
ENSG00000112531	QKI	protein_coding	2754.93	0.42614	4.67422	2.95071e-06	9.37552e-05
ENSG00000229961	RP11-71G12.1	transcribed_unitary_pseudogene	50.7666	-1.06095	-4.67386	2.95592e-06	9.37552e-05
ENSG00000125753	VASP	protein_coding	22110	0.582544	4.66489	3.08783e-06	9.77221e-05
ENSG00000101916	TLR8	protein_coding	3945.57	0.581781	4.65595	3.2249e-06	0.000101624
ENSG00000153774	CFDP1	protein_coding	555.266	0.474359	4.65547	3.23249e-06	0.000101624
ENSG00000184005	ST6GALNAC3	protein_coding	56.5831	0.934038	4.6559	3.22562e-06	0.000101624
ENSG00000101109	STK4	protein_coding	7366.2	0.411407	4.65401	3.25542e-06	0.00010212
ENSG00000100596	SPTLC2	protein_coding	2289.21	0.427731	4.6534	3.26513e-06	0.00010219
ENSG00000114316	USP4	protein_coding	3423.07	0.531367	4.65206	3.28629e-06	0.00010219
ENSG00000117335	CD46	protein_coding	9386.19	0.585153	4.65258	3.27803e-06	0.00010219
ENSG00000163563	MNDA	protein_coding	41231.1	0.588791	4.6521	3.28568e-06	0.00010219
ENSG00000119013	NDUFB3	protein_coding	677.586	0.567191	4.64669	3.37307e-06	0.00010466
ENSG00000007237	GAS7	protein_coding	2869.68	0.341417	4.64545	3.39339e-06	0.000104915
ENSG00000282608	ADORA3	protein_coding	110.112	-0.817776	-4.64529	3.39598e-06	0.000104915
ENSG00000079739	PGM1	protein_coding	895.712	0.46447	4.64422	3.41366e-06	0.000105234
ENSG00000110321	EIF4G2	protein_coding	14575.1	0.288473	4.64182	3.45348e-06	0.00010618
ENSG00000133318	RTN3	protein_coding	10031.1	0.692123	4.64148	3.45923e-06	0.00010618
ENSG00000078747	ITCH	protein_coding	1923.78	0.396493	4.6403	3.47897e-06	0.000106556
ENSG00000136238	RAC1	protein_coding	5462.01	0.35056	4.63948	3.49281e-06	0.000106751
ENSG00000051128	HOMER3	protein_coding	383.143	0.653946	4.63846	3.51013e-06	0.000107051
ENSG00000058091	CDK14	protein_coding	421.929	0.624363	4.63527	3.56466e-06	0.000108483
ENSG00000259207	ITGB3	protein_coding	1069.65	0.563438	4.62886	3.67686e-06	0.000111659
ENSG00000178802	MPI	protein_coding	518.314	-0.434345	-4.62562	3.73486e-06	0.00011318
ENSG00000150681	RGS18	protein_coding	3909.63	0.479137	4.62336	3.77573e-06	0.000114176
ENSG00000188641	DPYD	protein_coding	2251.35	0.437268	4.61754	3.88318e-06	0.000117177
ENSG00000197872	FAM49A	protein_coding	2669.95	0.495189	4.61508	3.92947e-06	0.000118324
ENSG00000108784	NAGLU	protein_coding	343.596	-0.522497	-4.61393	3.95121e-06	0.000118728
ENSG00000073737	DHRS9	protein_coding	876.559	0.662477	4.60961	4.03425e-06	0.000120968
ENSG00000017797	RALBP1	protein_coding	4491.59	0.575462	4.60639	4.09718e-06	0.000122598
ENSG00000103313	MEFV	protein_coding	5798.94	0.746413	4.60372	4.15014e-06	0.000123923
ENSG00000155099	TMEM55A	protein_coding	1431.37	0.674246	4.6006	4.21276e-06	0.00012553
ENSG00000127946	HIP1	protein_coding	2118.03	0.805505	4.58882	4.45753e-06	0.000132516
ENSG00000171051	FPR1	protein_coding	40857.6	0.713435	4.58844	4.4658e-06	0.000132516
ENSG00000109971	HSPA8	protein_coding	21780.6	0.354726	4.5873	4.49019e-06	0.000132964
ENSG00000117298	ECE1	protein_coding	7222.84	0.543989	4.58572	4.52419e-06	0.000133693
ENSG00000170836	PPM1D	protein_coding	573.32	0.496064	4.58384	4.56516e-06	0.000134625
ENSG00000163993	S100P	protein_coding	3496.67	0.818174	4.58191	4.60743e-06	0.000135592
ENSG00000116701	NCF2	protein_coding	31359.5	0.580171	4.57674	4.72285e-06	0.000138417
ENSG00000125347	IRF1	protein_coding	16213	0.535415	4.57688	4.71952e-06	0.000138417
ENSG00000105514	RAB3D	protein_coding	6289.99	0.746351	4.57617	4.73571e-06	0.00013851
ENSG00000132589	FLOT2	protein_coding	13103.3	0.516107	4.57429	4.77833e-06	0.00013947
ENSG00000110880	CORO1C	protein_coding	3840.02	0.5148	4.57293	4.80949e-06	0.000140094
ENSG00000160685	ZBTB7B	protein_coding	6271.34	0.534364	4.56944	4.89018e-06	0.000142154
ENSG00000145819	ARHGAP26	protein_coding	4157.28	0.618503	4.56631	4.9639e-06	0.0001439
ENSG00000181274	FRAT2	protein_coding	10267.4	0.639293	4.56603	4.97041e-06	0.0001439
ENSG00000104324	CPQ	protein_coding	2061.62	0.572166	4.56442	5.00871e-06	0.000144715
ENSG00000197081	IGF2R	protein_coding	24538.1	0.755184	4.56152	5.07854e-06	0.000146436
ENSG00000102007	PLP2	protein_coding	3610.43	0.385633	4.56062	5.10032e-06	0.000146473
ENSG00000170921	TANC2	protein_coding	391.378	0.686016	4.56073	5.09759e-06	0.000146473
ENSG00000089335	ZNF302	protein_coding	285.862	-0.519651	-4.55723	5.18332e-06	0.00014826
ENSG00000235568	NFAM1	protein_coding	16395.3	0.641713	4.55748	5.177e-06	0.00014826
ENSG00000005020	SKAP2	protein_coding	3198.37	0.603992	4.55313	5.28542e-06	0.000150576
ENSG00000162086	ZNF75A	protein_coding	221.989	-0.564837	-4.55341	5.27824e-06	0.000150576
ENSG00000143376	SNX27	protein_coding	2421.25	0.647391	4.55128	5.33217e-06	0.000151606
ENSG00000102144	PGK1	protein_coding	10641.7	0.321946	4.54972	5.37173e-06	0.000152427
ENSG00000132600	PRMT7	protein_coding	395.476	-0.472708	-4.54871	5.39754e-06	0.000152855
ENSG00000196850	PPTC7	protein_coding	1561.95	0.434559	4.5467	5.44941e-06	0.000154019
ENSG00000133872	SARAF	protein_coding	12657.5	0.312	4.54621	5.46213e-06	0.000154073
ENSG00000135124	P2RX4	protein_coding	452.025	-0.508383	-4.54383	5.52415e-06	0.000155515
ENSG00000141179	PCTP	protein_coding	902.748	0.538254	4.53752	5.69196e-06	0.00015961
ENSG00000188404	SELL	protein_coding	47900.5	0.64854	4.53763	5.6891e-06	0.00015961
ENSG00000171101	SIGLEC17P	transcribed_unprocessed_pseudogene	164.667	-0.693343	-4.53487	5.76383e-06	0.000160992
ENSG00000198734	F5	protein_coding	1399.68	0.787521	4.53518	5.75541e-06	0.000160992
ENSG00000266412	NCOA4	protein_coding	26746.5	0.494894	4.53246	5.82994e-06	0.000162521
ENSG00000082701	GSK3B	protein_coding	1895.84	0.476632	4.5312	5.86495e-06	0.000163178
ENSG00000085514	PILRA	protein_coding	9898.89	0.670682	4.52846	5.94146e-06	0.000164733
ENSG00000119139	TJP2	protein_coding	380.326	0.465827	4.52837	5.94392e-06	0.000164733
ENSG00000010404	IDS	protein_coding	9125.35	0.469171	4.52431	6.05942e-06	0.000167609
ENSG00000124201	ZNFX1	protein_coding	4463.77	0.468715	4.52288	6.10033e-06	0.000168414
ENSG00000109956	B3GAT1	protein_coding	195.781	-0.895829	-4.52132	6.14543e-06	0.000169331
ENSG00000132205	EMILIN2	protein_coding	2472.09	0.543123	4.52037	6.17328e-06	0.000169771
ENSG00000186407	CD300E	protein_coding	3303.35	0.64365	4.51705	6.27085e-06	0.000171792
ENSG00000280135	RP1-47M23.3	TEC	138.12	-0.620163	-4.51717	6.26705e-06	0.000171792
ENSG00000002834	LASP1	protein_coding	15824.3	0.504548	4.51379	6.36789e-06	0.000174117
ENSG00000082014	SMARCD3	protein_coding	615.74	0.378501	4.5117	6.43096e-06	0.000175505
ENSG00000082996	RNF13	protein_coding	2759.04	0.428553	4.51059	6.46471e-06	0.000175754
ENSG00000111817	DSE	protein_coding	728.994	0.601713	4.51091	6.45497e-06	0.000175754
ENSG00000140749	IGSF6	protein_coding	5923.52	0.597611	4.50846	6.52988e-06	0.000177188
ENSG00000155307	SAMSN1	protein_coding	1082.29	0.524773	4.50753	6.55858e-06	0.000177629
ENSG00000100461	RBM23	protein_coding	3675.46	0.532572	4.50406	6.66671e-06	0.000179536
ENSG00000101160	CTSZ	protein_coding	8303.81	0.426748	4.50486	6.64164e-06	0.000179536
ENSG00000140932	CMTM2	protein_coding	4320.9	0.714817	4.50416	6.66351e-06	0.000179536
ENSG00000130204	TOMM40	protein_coding	467.725	-0.481301	-4.50306	6.69814e-06	0.000180042
ENSG00000040633	PHF23	protein_coding	1595.42	0.404874	4.50165	6.74277e-06	0.000180273
ENSG00000065559	MAP2K4	protein_coding	1588.97	0.423027	4.50159	6.74462e-06	0.000180273
ENSG00000166527	CLEC4D	protein_coding	255.247	0.616611	4.50231	6.72174e-06	0.000180273
ENSG00000100221	JOSD1	protein_coding	1235.84	0.391714	4.50081	6.7696e-06	0.000180603
ENSG00000113269	RNF130	protein_coding	7968.81	0.490409	4.49948	6.81193e-06	0.000181393
ENSG00000232653	GOLGA8N	protein_coding	268.931	-0.628087	-4.49898	6.82788e-06	0.000181479
ENSG00000104731	KLHDC4	protein_coding	677.075	-0.42832	-4.49812	6.85579e-06	0.000181882
ENSG00000088832	FKBP1A	protein_coding	5551.52	0.44938	4.49675	6.89992e-06	0.000182063
ENSG00000152463	OLAH	protein_coding	18.0824	2.0693	4.49715	6.88698e-06	0.000182063
ENSG00000270882	HIST2H4A	protein_coding	263.742	0.658607	4.49672	6.90088e-06	0.000182063
ENSG00000211459	MT-RNR1	Mt_rRNA	66019.2	0.486099	4.4944	6.97666e-06	0.000183723
ENSG00000132823	OSER1	protein_coding	1850.73	0.494171	4.49268	7.03316e-06	0.00018487
ENSG00000095787	WAC	protein_coding	4526.76	0.38268	4.48974	7.13098e-06	0.000187096
ENSG00000168769	TET2	protein_coding	2166.9	0.611019	4.48708	7.2207e-06	0.000189103
ENSG00000115339	GALNT3	protein_coding	570.157	0.592387	4.48439	7.3123e-06	0.000191151
ENSG00000216490	IFI30	protein_coding	14531.6	0.35844	4.48203	7.39378e-06	0.000192928
ENSG00000114331	ACAP2	protein_coding	2746.33	0.441663	4.48075	7.43819e-06	0.000193183
ENSG00000120896	SORBS3	protein_coding	535.089	-0.465313	-4.48099	7.42965e-06	0.000193183
ENSG00000229314	ORM1	protein_coding	371.68	0.932247	4.48058	7.44415e-06	0.000193183
ENSG00000086065	CHMP5	protein_coding	1218.12	0.403857	4.47922	7.49154e-06	0.000194059
ENSG00000181036	FCRL6	protein_coding	695.517	-0.765587	-4.47746	7.5538e-06	0.000194969
ENSG00000243927	MRPS6	protein_coding	801.652	0.423557	4.47745	7.55399e-06	0.000194969
ENSG00000101224	CDC25B	protein_coding	3302.31	-0.368876	-4.47545	7.62513e-06	0.00019645
ENSG00000108963	DPH1	protein_coding	351.336	-0.484693	-4.47083	7.79148e-06	0.000200374
ENSG00000142657	PGD	protein_coding	9508.9	0.6615	4.47041	7.8071e-06	0.000200415
ENSG00000111266	DUSP16	protein_coding	903.107	0.387337	4.46803	7.89447e-06	0.000201785
ENSG00000115604	IL18R1	protein_coding	385.306	0.486573	4.46753	7.91264e-06	0.000201785
ENSG00000163430	FSTL1	protein_coding	55.6941	0.984232	4.46742	7.91703e-06	0.000201785
ENSG00000235655	H3F3AP4	processed_pseudogene	1325.49	0.56749	4.46819	7.88828e-06	0.000201785
ENSG00000125459	MSTO1	protein_coding	280.367	-0.589875	-4.46563	7.98335e-06	0.000203113
ENSG00000181982	CCDC149	protein_coding	196.026	0.689595	4.46268	8.09407e-06	0.000205563
ENSG00000225614	ZNF469	protein_coding	70.1084	-0.8122	-4.46209	8.11641e-06	0.000205765
ENSG00000114013	CD86	protein_coding	1064.84	0.568107	4.46125	8.14832e-06	0.000206207
ENSG00000166501	PRKCB	protein_coding	9292.35	0.379152	4.46052	8.17608e-06	0.000206544
ENSG00000113448	PDE4D	protein_coding	271.67	0.508588	4.45823	8.26384e-06	0.000208392
ENSG00000161921	CXCL16	protein_coding	2776.05	0.626309	4.45621	8.3421e-06	0.000209994
ENSG00000175215	CTDSP2	protein_coding	13756	0.515669	4.45488	8.39406e-06	0.00021093
ENSG00000134955	SLC37A2	protein_coding	759.025	0.46071	4.4523	8.49551e-06	0.000213105
ENSG00000185650	ZFP36L1	protein_coding	11716	0.612668	4.45167	8.52057e-06	0.000213358
ENSG00000049323	LTBP1	protein_coding	182.493	0.643889	4.44962	8.60218e-06	0.000215024
ENSG00000139644	TMBIM6	protein_coding	20492.9	0.356467	4.44507	8.78613e-06	0.000219238
ENSG00000101236	RNF24	protein_coding	6533.5	0.835637	4.44446	8.81115e-06	0.000219479
ENSG00000162924	REL	protein_coding	569.225	0.468647	4.44088	8.95907e-06	0.000222775
ENSG00000175471	MCTP1	protein_coding	525.005	0.455009	4.44027	8.98481e-06	0.000223026
ENSG00000149476	TKFC	protein_coding	473.261	-0.43234	-4.43902	9.03675e-06	0.000223926
ENSG00000188554	NBR1	protein_coding	4521.48	0.347034	4.43656	9.14071e-06	0.00022611
ENSG00000275395	FCGBP	protein_coding	524.257	-0.466455	-4.43578	9.17385e-06	0.000226537
ENSG00000148803	FUOM	protein_coding	117.441	-0.683913	-4.43438	9.2337e-06	0.000227449
ENSG00000154845	PPP4R1	protein_coding	3547.28	0.517572	4.43417	9.24264e-06	0.000227449
ENSG00000274276	CBSL	protein_coding	21.6088	2.49521	4.43193	9.33925e-06	0.000229431
ENSG00000168610	STAT3	protein_coding	10129.3	0.569775	4.42823	9.50092e-06	0.000233001
ENSG00000077514	POLD3	protein_coding	462.242	0.442751	4.42765	9.52641e-06	0.000233225
ENSG00000120690	ELF1	protein_coding	4464.47	0.318857	4.42727	9.54349e-06	0.000233244
ENSG00000168300	PCMTD1	protein_coding	1335.5	0.450306	4.42679	9.56467e-06	0.000233362
ENSG00000113721	PDGFRB	protein_coding	87.2466	-0.918923	-4.42048	9.84819e-06	0.000239869
ENSG00000067900	ROCK1	protein_coding	3002.1	0.443867	4.41972	9.88296e-06	0.000240306
ENSG00000198682	PAPSS2	protein_coding	121.872	0.747037	4.41115	1.02824e-05	0.000249593
ENSG00000158825	CDA	protein_coding	4011.59	0.797737	4.41022	1.03268e-05	0.000250244
ENSG00000109743	BST1	protein_coding	2898.03	0.669152	4.40972	1.03503e-05	0.000250389
ENSG00000166272	WBP1L	protein_coding	2852.22	0.297517	4.40825	1.04207e-05	0.000251242
ENSG00000269837	IPO5P1	transcribed_processed_pseudogene	78.1178	-0.877637	-4.40848	1.04098e-05	0.000251242
ENSG00000101384	JAG1	protein_coding	94.8861	0.918039	4.40442	1.06068e-05	0.000255297
ENSG00000277053	GTF2IP1	transcribed_unprocessed_pseudogene	3056.42	0.542775	4.40373	1.06403e-05	0.000255673
ENSG00000179588	ZFPM1	protein_coding	302.855	-0.709547	-4.40205	1.07233e-05	0.000257234
ENSG00000139832	RAB20	protein_coding	266.634	0.735046	4.39996	1.08268e-05	0.000259281
ENSG00000196562	SULF2	protein_coding	5997.75	0.598298	4.39869	1.08907e-05	0.000260374
ENSG00000146072	TNFRSF21	protein_coding	87.2971	-0.983153	-4.39741	1.09549e-05	0.00026147
ENSG00000198176	TFDP1	protein_coding	1299.46	0.371728	4.39509	1.10727e-05	0.000263841
ENSG00000111647	UHRF1BP1L	protein_coding	848.99	0.52376	4.39472	1.10914e-05	0.000263845
ENSG00000131089	ARHGEF9	protein_coding	302.652	-0.552028	-4.39257	1.12016e-05	0.000266024
ENSG00000163694	RBM47	protein_coding	3254.94	0.645097	4.38857	1.14098e-05	0.000270518
ENSG00000100368	CSF2RB	protein_coding	22337.4	0.633087	4.38783	1.14488e-05	0.000270629
ENSG00000100731	PCNX1	protein_coding	3328.51	0.554917	4.38776	1.14524e-05	0.000270629
ENSG00000168310	IRF2	protein_coding	3862.7	0.463054	4.38614	1.15379e-05	0.000272199
ENSG00000182885	ADGRG3	protein_coding	5113.95	1.26747	4.38383	1.16613e-05	0.000274656
ENSG00000161911	TREML1	protein_coding	656.904	0.43677	4.38289	1.17114e-05	0.000275382
ENSG00000113732	ATP6V0E1	protein_coding	4756.39	0.329682	4.38111	1.18075e-05	0.000277186
ENSG00000167470	MIDN	protein_coding	6439.41	0.575158	4.38049	1.18411e-05	0.000277518
ENSG00000183087	GAS6	protein_coding	133.003	-0.755856	-4.37918	1.19128e-05	0.00027874
ENSG00000111897	SERINC1	protein_coding	5405.96	0.40826	4.3739	1.22044e-05	0.000285095
ENSG00000197555	SIPA1L1	protein_coding	2826.24	0.576944	4.37341	1.22321e-05	0.000285276
ENSG00000178974	FBXO34	protein_coding	698.338	0.366227	4.37221	1.22996e-05	0.000286382
ENSG00000197601	FAR1	protein_coding	1580.3	0.49554	4.37127	1.23527e-05	0.000287151
ENSG00000033800	PIAS1	protein_coding	2200.14	0.459608	4.37025	1.24103e-05	0.000288019
ENSG00000166233	ARIH1	protein_coding	1276.03	0.300926	4.3698	1.24362e-05	0.000288153
ENSG00000169564	PCBP1	protein_coding	16694.9	0.390431	4.36686	1.26044e-05	0.000291576
ENSG00000164733	CTSB	protein_coding	10124	0.321127	4.36612	1.26471e-05	0.000292091
ENSG00000135074	ADAM19	protein_coding	4194.92	0.728163	4.35415	1.33581e-05	0.000308014
ENSG00000204713	TRIM27	protein_coding	2740.1	0.347577	4.35057	1.35787e-05	0.000312594
ENSG00000134827	TCN1	protein_coding	188.656	0.708909	4.34844	1.37112e-05	0.000315136
ENSG00000165071	TMEM71	protein_coding	3144.33	0.488152	4.34715	1.37916e-05	0.000316475
ENSG00000136718	IMP4	protein_coding	699.639	-0.395673	-4.34399	1.39917e-05	0.000320552
ENSG00000001167	NFYA	protein_coding	1058.33	0.43556	4.34191	1.4125e-05	0.000322177
ENSG00000012232	EXTL3	protein_coding	2681.15	0.531727	4.34183	1.41304e-05	0.000322177
ENSG00000204936	CD177	protein_coding	65.1542	1.50399	4.34189	1.4126e-05	0.000322177
ENSG00000172663	TMEM134	protein_coding	452.347	-0.414343	-4.33615	1.44998e-05	0.000330073
ENSG00000140688	C16orf58	protein_coding	923.549	-0.371199	-4.32981	1.49238e-05	0.00033913
ENSG00000160712	IL6R	protein_coding	16830.2	0.619991	4.32941	1.49508e-05	0.00033913
ENSG00000166523	CLEC4E	protein_coding	3624.06	0.735206	4.32897	1.49811e-05	0.00033913
ENSG00000213246	SUPT4H1	protein_coding	3039.91	0.373237	4.3288	1.49927e-05	0.00033913
ENSG00000087206	UIMC1	protein_coding	1511.12	0.470404	4.32717	1.51034e-05	0.000341093
ENSG00000163902	RPN1	protein_coding	6049.37	0.312059	4.32677	1.51312e-05	0.000341181
ENSG00000066027	PPP2R5A	protein_coding	3156.85	0.414529	4.32569	1.52052e-05	0.000342308
ENSG00000157540	DYRK1A	protein_coding	2171.17	0.335128	4.32353	1.5355e-05	0.000345137
ENSG00000038427	VCAN	protein_coding	7715.62	0.55459	4.32305	1.53884e-05	0.000345345
ENSG00000091039	OSBPL8	protein_coding	3401.08	0.44305	4.32175	1.54799e-05	0.000346757
ENSG00000106772	PRUNE2	protein_coding	69.485	1.02911	4.32077	1.55485e-05	0.000346757
ENSG00000115590	IL1R2	protein_coding	2253.09	0.747322	4.32087	1.55415e-05	0.000346757
ENSG00000115594	IL1R1	protein_coding	413.62	0.881282	4.32111	1.55248e-05	0.000346757
ENSG00000008294	SPAG9	protein_coding	2323.11	0.525116	4.31782	1.57576e-05	0.000350872
ENSG00000161040	FBXL13	protein_coding	81.9802	0.835786	4.31646	1.58549e-05	0.000352486
ENSG00000005893	LAMP2	protein_coding	5676.74	0.557065	4.31496	1.59632e-05	0.000354342
ENSG00000118785	SPP1	protein_coding	88.4485	1.08648	4.31437	1.60058e-05	0.000354736
ENSG00000101558	VAPA	protein_coding	2543.39	0.417388	4.31135	1.62264e-05	0.00035907
ENSG00000140941	MAP1LC3B	protein_coding	3830.55	0.387304	4.31012	1.63164e-05	0.000360501
ENSG00000197746	PSAP	protein_coding	76844.4	0.383852	4.30753	1.65087e-05	0.000364186
ENSG00000105205	CLC	protein_coding	2320.84	-0.494466	-4.30706	1.65439e-05	0.000364399
ENSG00000158792	SPATA2L	protein_coding	451.668	0.553049	4.30223	1.69087e-05	0.000371861
ENSG00000144711	IQSEC1	protein_coding	7291.55	0.560605	4.30103	1.70003e-05	0.0003733
ENSG00000182557	SPNS3	protein_coding	182.388	-0.565681	-4.29739	1.72822e-05	0.000378908
ENSG00000051620	HEBP2	protein_coding	1951.38	0.507689	4.29685	1.73244e-05	0.000379009
ENSG00000087253	LPCAT2	protein_coding	1866.38	0.622998	4.29665	1.734e-05	0.000379009
ENSG00000205302	SNX2	protein_coding	1871.26	0.30357	4.29556	1.74255e-05	0.000380297
ENSG00000185710	SMG1P4	transcribed_unprocessed_pseudogene	93.191	1.00197	4.29473	1.7491e-05	0.000381143
ENSG00000197858	GPAA1	protein_coding	1200.25	-0.3397	-4.29165	1.77354e-05	0.00038588
ENSG00000275464	CH507-9B2.5	protein_coding	577.851	-0.390471	-4.28883	1.79617e-05	0.000390208
ENSG00000111229	ARPC3	protein_coding	12566.8	0.37151	4.28777	1.80477e-05	0.000391481
ENSG00000265972	TXNIP	protein_coding	105261	0.444179	4.28569	1.82171e-05	0.000394557
ENSG00000166289	PLEKHF1	protein_coding	545.906	-0.629964	-4.28531	1.82488e-05	0.000394643
ENSG00000138071	ACTR2	protein_coding	11410	0.338376	4.28311	1.84298e-05	0.000397956
ENSG00000166333	ILK	protein_coding	3456.3	0.311385	4.27748	1.89022e-05	0.000407538
ENSG00000197956	S100A6	protein_coding	14844.3	0.471887	4.27517	1.90994e-05	0.000411169
ENSG00000142166	IFNAR1	protein_coding	2648.06	0.437072	4.27346	1.92459e-05	0.0004137
ENSG00000197629	MPEG1	protein_coding	14736.8	0.418087	4.27276	1.93069e-05	0.000414386
ENSG00000128016	ZFP36	protein_coding	9848.9	0.524087	4.2722	1.93555e-05	0.000414806
ENSG00000115091	ACTR3	protein_coding	9737.44	0.35279	4.27031	1.95199e-05	0.000417702
ENSG00000184613	NELL2	protein_coding	1339.84	-0.490487	-4.2633	2.01434e-05	0.000430399
ENSG00000067560	RHOA	protein_coding	19803	0.341919	4.26239	2.02248e-05	0.000431493
ENSG00000203710	CR1	protein_coding	3821.71	0.743729	4.26134	2.03209e-05	0.000432896
ENSG00000183762	KREMEN1	protein_coding	1184.75	0.750522	4.25973	2.04671e-05	0.00043536
ENSG00000173890	GPR160	protein_coding	361.468	0.635525	4.25897	2.0537e-05	0.000436198
ENSG00000130522	JUND	protein_coding	4243.01	0.429218	4.25545	2.08633e-05	0.000442468
ENSG00000135407	AVIL	protein_coding	175.524	0.990818	4.25489	2.09149e-05	0.000442906
ENSG00000132475	H3F3B	protein_coding	25261.4	0.480463	4.25407	2.09922e-05	0.000443885
ENSG00000068724	TTC7A	protein_coding	2027.89	0.320194	4.24862	2.15094e-05	0.000454148
ENSG00000277632	CCL3	protein_coding	60.6873	-1.02074	-4.24799	2.15699e-05	0.000454752
ENSG00000139946	PELI2	protein_coding	1005.58	0.598087	4.24481	2.18779e-05	0.000460566
ENSG00000149177	PTPRJ	protein_coding	8855.81	0.568686	4.2425	2.21048e-05	0.000464656
ENSG00000101265	RASSF2	protein_coding	20055.4	0.602296	4.24212	2.21414e-05	0.000464742
ENSG00000144747	TMF1	protein_coding	1104.66	0.36984	4.2408	2.22724e-05	0.000466805
ENSG00000274536	RP6-159A1.4	antisense	2581.2	0.801123	4.23939	2.24125e-05	0.000469052
ENSG00000137767	SQRDL	protein_coding	3407.59	0.436383	4.23878	2.2474e-05	0.000469651
ENSG00000127954	STEAP4	protein_coding	6206.27	0.711398	4.23794	2.25581e-05	0.000470718
ENSG00000132768	DPH2	protein_coding	384.309	-0.473516	-4.23564	2.27907e-05	0.000474877
ENSG00000254858	MPV17L2	protein_coding	133.366	-0.578124	-4.235	2.28555e-05	0.000475533
ENSG00000113555	PCDH12	protein_coding	39.5664	1.15177	4.23392	2.29651e-05	0.000477119
ENSG00000115165	CYTIP	protein_coding	5330.84	0.425019	4.23328	2.30306e-05	0.000477785
ENSG00000129355	CDKN2D	protein_coding	3191.17	0.463035	4.22691	2.36927e-05	0.000490265
ENSG00000162702	ZNF281	protein_coding	743.751	0.470004	4.22683	2.37009e-05	0.000490265
ENSG00000111802	TDP2	protein_coding	2043.59	0.374456	4.22368	2.40348e-05	0.000496452
ENSG00000160999	SH2B2	protein_coding	976.977	0.510173	4.22215	2.41987e-05	0.000499115
ENSG00000095794	CREM	protein_coding	186.156	0.679634	4.22016	2.44124e-05	0.000502354
ENSG00000119844	AFTPH	protein_coding	1621.22	0.387081	4.22004	2.44261e-05	0.000502354
ENSG00000164111	ANXA5	protein_coding	3216.71	0.359074	4.2175	2.47023e-05	0.000507304
ENSG00000186088	GSAP	protein_coding	470.829	-0.413435	-4.2164	2.48235e-05	0.00050906
ENSG00000248487	ABHD14A	protein_coding	245.591	-0.551025	-4.21478	2.50018e-05	0.000511982
ENSG00000124226	RNF114	protein_coding	1965.04	0.356679	4.21374	2.51172e-05	0.000513608
ENSG00000232859	LYRM9	protein_coding	148.063	-0.55472	-4.21205	2.53062e-05	0.000516731
ENSG00000123983	ACSL3	protein_coding	557.617	0.36688	4.21163	2.53534e-05	0.000516957
ENSG00000166900	STX3	protein_coding	4583.93	0.671348	4.21095	2.54298e-05	0.000517774
ENSG00000173846	PLK3	protein_coding	705.107	0.579177	4.20912	2.56372e-05	0.000520671
ENSG00000197329	PELI1	protein_coding	4401.68	0.570442	4.20905	2.56451e-05	0.000520671
ENSG00000100504	PYGL	protein_coding	8200.39	0.774057	4.20757	2.58132e-05	0.000522836
ENSG00000164754	RAD21	protein_coding	4468.82	0.392128	4.20747	2.5825e-05	0.000522836
ENSG00000086300	SNX10	protein_coding	2077.36	0.485915	4.20553	2.60471e-05	0.000526586
ENSG00000130775	THEMIS2	protein_coding	11361.2	0.572676	4.20396	2.62281e-05	0.000529496
ENSG00000186834	HEXIM1	protein_coding	1092.54	0.3743	4.20084	2.65923e-05	0.00053609
ENSG00000136689	IL1RN	protein_coding	2612.14	0.659155	4.19917	2.6789e-05	0.000538972
ENSG00000276289	KCNE1B	protein_coding	52.6765	1.00587	4.19899	2.68108e-05	0.000538972
ENSG00000164032	H2AFZ	protein_coding	2998.15	0.336959	4.1985	2.68692e-05	0.000539387
ENSG00000170892	TSEN34	protein_coding	3853.36	0.573124	4.19771	2.69628e-05	0.000540506
ENSG00000177125	ZBTB34	protein_coding	1594.8	0.617283	4.1969	2.70599e-05	0.000541691
ENSG00000010818	HIVEP2	protein_coding	1635.77	0.28678	4.19592	2.71768e-05	0.00054327
ENSG00000152766	ANKRD22	protein_coding	63.5351	1.08214	4.1917	2.76878e-05	0.000552711
ENSG00000105364	MRPL4	protein_coding	425.067	-0.429089	-4.19095	2.77791e-05	0.000553759
ENSG00000144677	CTDSPL	protein_coding	328.107	0.507857	4.18983	2.79158e-05	0.000555707
ENSG00000075151	EIF4G3	protein_coding	971.825	0.431136	4.18887	2.80343e-05	0.000556849
ENSG00000138185	ENTPD1	protein_coding	1850.75	0.461096	4.18847	2.80844e-05	0.000556849
ENSG00000151490	PTPRO	protein_coding	179.947	-0.702169	-4.18842	2.80902e-05	0.000556849
ENSG00000141576	RNF157	protein_coding	562.408	-0.486695	-4.18388	2.86577e-05	0.000567311
ENSG00000157800	SLC37A3	protein_coding	397.029	0.743948	4.18356	2.86978e-05	0.000567318
ENSG00000123636	BAZ2B	protein_coding	1455.99	0.579598	4.18305	2.87619e-05	0.000567799
ENSG00000185920	PTCH1	protein_coding	424.482	-0.515305	-4.18252	2.88293e-05	0.000568343
ENSG00000137642	SORL1	protein_coding	31427	0.623822	4.17993	2.91592e-05	0.000574055
ENSG00000116044	NFE2L2	protein_coding	2284.53	0.430587	4.17772	2.94448e-05	0.000578878
ENSG00000105135	ILVBL	protein_coding	344.012	-0.450104	-4.1754	2.97465e-05	0.000583202
ENSG00000171236	LRG1	protein_coding	4083.9	1.1102	4.17564	2.97152e-05	0.000583202
ENSG00000229644	NAMPTP1	processed_pseudogene	1684.11	0.765404	4.17461	2.98498e-05	0.000584426
ENSG00000083444	PLOD1	protein_coding	1657.72	0.547564	4.16796	3.07339e-05	0.000600089
ENSG00000118564	FBXL5	protein_coding	5285.97	0.517431	4.16811	3.0714e-05	0.000600089
ENSG00000253729	PRKDC	protein_coding	3260.74	0.467537	4.16698	3.08658e-05	0.00060184
ENSG00000188747	NOXA1	protein_coding	62.5479	-0.893414	-4.16581	3.10251e-05	0.000604121
ENSG00000138735	PDE5A	protein_coding	123.05	0.679793	4.16544	3.1075e-05	0.00060415
ENSG00000167210	LOXHD1	protein_coding	89.8291	0.916466	4.16518	3.11112e-05	0.00060415
ENSG00000183726	TMEM50A	protein_coding	3710.07	0.340256	4.15647	3.23209e-05	0.000626789
ENSG00000164924	YWHAZ	protein_coding	16287	0.313257	4.15398	3.26737e-05	0.00063277
ENSG00000164715	LMTK2	protein_coding	1171.75	0.661906	4.15351	3.27416e-05	0.000633227
ENSG00000028137	TNFRSF1B	protein_coding	24837.5	0.44654	4.15272	3.28543e-05	0.000634546
ENSG00000197632	SERPINB2	protein_coding	60.2234	0.833416	4.14963	3.33006e-05	0.000642297
ENSG00000187446	CHP1	protein_coding	2069.71	0.384152	4.14645	3.37665e-05	0.000650403
ENSG00000068323	TFE3	protein_coding	4117.02	0.60112	4.14526	3.3943e-05	0.000652922
ENSG00000040341	STAU2	protein_coding	400.915	0.38978	4.14477	3.40161e-05	0.000653449
ENSG00000115523	GNLY	protein_coding	7143.34	-0.532002	-4.14351	3.42028e-05	0.000654894
ENSG00000125458	NT5C	protein_coding	460.946	-0.408504	-4.14392	3.41426e-05	0.000654894
ENSG00000241360	PDXP	protein_coding	116.575	-0.819839	-4.14334	3.4229e-05	0.000654894
ENSG00000141429	GALNT1	protein_coding	1051.12	0.349786	4.14119	3.45511e-05	0.000660171
ENSG00000136436	CALCOCO2	protein_coding	2893.01	0.375436	4.14023	3.46958e-05	0.000661286
ENSG00000167565	SERTAD3	protein_coding	733.151	0.490836	4.13988	3.47484e-05	0.000661286
ENSG00000180549	FUT7	protein_coding	1492.68	0.592049	4.14014	3.47091e-05	0.000661286
ENSG00000141526	SLC16A3	protein_coding	9209.43	0.676011	4.13673	3.52296e-05	0.00066955
ENSG00000074966	TXK	protein_coding	474.865	-0.517352	-4.13495	3.55039e-05	0.000673866
ENSG00000168329	CX3CR1	protein_coding	4564.29	-0.658707	-4.13273	3.58482e-05	0.000679496
ENSG00000113161	HMGCR	protein_coding	1717.85	0.523263	4.13043	3.62085e-05	0.000684192
ENSG00000134250	NOTCH2	protein_coding	7234.5	0.385859	4.1308	3.61498e-05	0.000684192
ENSG00000147010	SH3KBP1	protein_coding	5476.4	0.383956	4.13013	3.62555e-05	0.000684192
ENSG00000164506	STXBP5	protein_coding	1249.23	0.48823	4.12993	3.62876e-05	0.000684192
ENSG00000113749	HRH2	protein_coding	4088.42	0.458014	4.12941	3.63699e-05	0.000684839
ENSG00000198794	SCAMP5	protein_coding	140.936	-0.705718	-4.12858	3.65007e-05	0.000685493
ENSG00000255833	TIFAB	protein_coding	81.8692	-0.797948	-4.12867	3.6487e-05	0.000685493
ENSG00000233369	GTF2IP4	transcribed_processed_pseudogene	5125.37	0.630927	4.12691	3.67672e-05	0.00068959
ENSG00000125170	DOK4	protein_coding	164.205	0.697701	4.12574	3.69548e-05	0.000691291
ENSG00000163605	PPP4R2	protein_coding	1128.3	0.412262	4.1259	3.69284e-05	0.000691291
ENSG00000167074	TEF	protein_coding	289.892	-0.602455	-4.12478	3.71086e-05	0.000693261
ENSG00000054282	SDCCAG8	protein_coding	227.509	0.505449	4.12279	3.74313e-05	0.000696316
ENSG00000173825	TIGD3	protein_coding	741.585	0.540989	4.12294	3.74068e-05	0.000696316
ENSG00000204228	HSD17B8	protein_coding	138.841	-0.646983	-4.12266	3.74515e-05	0.000696316
ENSG00000254087	LYN	protein_coding	17947.7	0.483793	4.12257	3.74673e-05	0.000696316
ENSG00000275342	PRAG1	protein_coding	686.144	-0.487808	-4.11988	3.79078e-05	0.000703586
ENSG00000132005	RFX1	protein_coding	969.506	0.481504	4.11893	3.80628e-05	0.000705545
ENSG00000136810	TXN	protein_coding	1855.1	0.557505	4.11806	3.82083e-05	0.000707325
ENSG00000110400	NECTIN1	protein_coding	620.861	0.756608	4.11688	3.8404e-05	0.000710026
ENSG00000145703	IQGAP2	protein_coding	2836.54	0.379573	4.11607	3.85382e-05	0.000711586
ENSG00000065802	ASB1	protein_coding	597.087	-0.364829	-4.11574	3.85946e-05	0.000711706
ENSG00000163513	TGFBR2	protein_coding	9479.38	0.437082	4.11329	3.90056e-05	0.000718357
ENSG00000175197	DDIT3	protein_coding	649.222	0.56634	4.11297	3.90603e-05	0.000718438
ENSG00000105483	CARD8	protein_coding	4108.29	0.544934	4.11262	3.912e-05	0.00071861
ENSG00000167775	CD320	protein_coding	447.022	-0.451683	-4.1096	3.9634e-05	0.000727115
ENSG00000159128	IFNGR2	protein_coding	7379.03	0.520666	4.10836	3.98483e-05	0.000730109
ENSG00000165046	LETM2	protein_coding	246.467	0.757936	4.10441	4.0535e-05	0.000741739
ENSG00000197442	MAP3K5	protein_coding	2028.56	0.496611	4.10305	4.07738e-05	0.000745153
ENSG00000048162	NOP16	protein_coding	179.27	-0.581329	-4.1025	4.08712e-05	0.000745979
ENSG00000188559	RALGAPA2	protein_coding	1484.2	0.589823	4.10168	4.10157e-05	0.000747147
ENSG00000233461	RP11-295G20.2	antisense	114.664	0.656753	4.10155	4.104e-05	0.000747147
ENSG00000111052	LIN7A	protein_coding	684.909	0.637207	4.10031	4.12593e-05	0.000750184
ENSG00000131355	ADGRE3	protein_coding	4607.66	0.676356	4.09976	4.13578e-05	0.000751018
ENSG00000116489	CAPZA1	protein_coding	6702.53	0.34248	4.09726	4.18061e-05	0.000757232
ENSG00000148344	PTGES	protein_coding	42.4052	1.13518	4.09755	4.17552e-05	0.000757232
ENSG00000204394	VARS	protein_coding	979.181	-0.348249	-4.09374	4.24463e-05	0.000766892
ENSG00000204475	NCR3	protein_coding	470.831	-0.569625	-4.09374	4.24469e-05	0.000766892
ENSG00000054523	KIF1B	protein_coding	855.046	0.528778	4.09324	4.25393e-05	0.000767589
ENSG00000163220	S100A9	protein_coding	164494	0.555694	4.09265	4.26474e-05	0.000768568
ENSG00000108061	SHOC2	protein_coding	1670.4	0.431341	4.09205	4.27582e-05	0.000769593
ENSG00000126759	CFP	protein_coding	9782.4	0.518845	4.09101	4.29506e-05	0.000771774
ENSG00000176597	B3GNT5	protein_coding	280.729	0.612918	4.09081	4.29875e-05	0.000771774
ENSG00000023318	ERP44	protein_coding	1553.43	0.349975	4.08792	4.35258e-05	0.000774643
ENSG00000110395	CBL	protein_coding	4269.57	0.553166	4.08851	4.34158e-05	0.000774643
ENSG00000118482	PHF3	protein_coding	2102.04	0.331627	4.08867	4.33853e-05	0.000774643
ENSG00000124588	NQO2	protein_coding	1045.07	0.59118	4.08791	4.35272e-05	0.000774643
ENSG00000145431	PDGFC	protein_coding	72.7397	-0.758106	-4.08816	4.34811e-05	0.000774643
ENSG00000146007	ZMAT2	protein_coding	2710.28	0.292257	4.08808	4.34949e-05	0.000774643
ENSG00000182197	EXT1	protein_coding	263.675	0.452385	4.08934	4.32593e-05	0.000774643
ENSG00000112079	STK38	protein_coding	5304.32	0.346683	4.08684	4.37293e-05	0.000776675
ENSG00000162490	DRAXIN	protein_coding	44.2635	-1.19871	-4.08673	4.37502e-05	0.000776675
ENSG00000122025	FLT3	protein_coding	165.15	-0.587066	-4.08537	4.40071e-05	0.000780265
ENSG00000267100	ILF3-AS1	lincRNA	232.972	-0.456485	-4.08284	4.44878e-05	0.00078781
ENSG00000081307	UBA5	protein_coding	221.739	-0.525954	-4.08147	4.4752e-05	0.000791045
ENSG00000169891	REPS2	protein_coding	1336.34	0.728679	4.08132	4.47814e-05	0.000791045
ENSG00000163754	GYG1	protein_coding	942.114	0.377921	4.07865	4.52979e-05	0.000799181
ENSG00000117614	SYF2	protein_coding	1952.26	0.278234	4.07739	4.55449e-05	0.000802546
ENSG00000164713	BRI3	protein_coding	3727.56	0.468291	4.07266	4.64801e-05	0.000818016
ENSG00000172081	MOB3A	protein_coding	17133.9	0.544232	4.07229	4.65525e-05	0.00081828
ENSG00000135250	SRPK2	protein_coding	2352.78	0.46658	4.07189	4.66332e-05	0.000818691
ENSG00000137845	ADAM10	protein_coding	3229.41	0.34306	4.06988	4.70366e-05	0.000824758
ENSG00000175029	CTBP2	protein_coding	1542.64	0.513204	4.06943	4.71285e-05	0.000825356
ENSG00000139278	GLIPR1	protein_coding	4000.35	0.401424	4.06881	4.72542e-05	0.000826543
ENSG00000221817	PPP3CB-AS1	processed_transcript	147.973	-0.543908	-4.0668	4.76637e-05	0.000832686
ENSG00000101162	TUBB1	protein_coding	4385.85	0.466681	4.06368	4.83052e-05	0.000842861
ENSG00000136754	ABI1	protein_coding	2364.31	0.29279	4.06265	4.85179e-05	0.000845538
ENSG00000027869	SH2D2A	protein_coding	682.555	0.429482	4.05807	4.9479e-05	0.000860253
ENSG00000115935	WIPF1	protein_coding	16395.7	0.481371	4.05806	4.94828e-05	0.000860253
ENSG00000143207	RFWD2	protein_coding	2275.17	0.449808	4.0568	4.9749e-05	0.00086383
ENSG00000160710	ADAR	protein_coding	15743.7	0.49186	4.05225	5.07279e-05	0.000879755
ENSG00000141480	ARRB2	protein_coding	16127	0.477353	4.05021	5.1171e-05	0.000886364
ENSG00000174516	PELI3	protein_coding	197.675	0.583264	4.04668	5.19495e-05	0.000898757
ENSG00000106829	TLE4	protein_coding	2610.46	0.522686	4.045	5.23221e-05	0.000903234
ENSG00000163393	SLC22A15	protein_coding	339.982	0.633212	4.04495	5.23348e-05	0.000903234
ENSG00000134287	ARF3	protein_coding	5791.04	0.360792	4.04399	5.25501e-05	0.000904762
ENSG00000167962	ZNF598	protein_coding	794.378	-0.374065	-4.04409	5.25267e-05	0.000904762
ENSG00000163466	ARPC2	protein_coding	17357.1	0.315777	4.04295	5.27832e-05	0.000906589
ENSG00000181350	LRRC75A	protein_coding	306.405	0.923104	4.04298	5.27769e-05	0.000906589
ENSG00000124507	PACSIN1	protein_coding	188.397	-0.532866	-4.0418	5.30422e-05	0.000908849
ENSG00000142089	IFITM3	protein_coding	10508.2	0.520368	4.04194	5.30101e-05	0.000908849
ENSG00000157450	RNF111	protein_coding	1265.82	0.437707	4.04076	5.32786e-05	0.000911804
ENSG00000134755	DSC2	protein_coding	686.558	0.583791	4.03948	5.3569e-05	0.000915678
ENSG00000169896	ITGAM	protein_coding	8316.66	0.589486	4.0383	5.38398e-05	0.00091811
ENSG00000178921	PFAS	protein_coding	320.291	-0.402414	-4.0383	5.384e-05	0.00091811
ENSG00000164463	CREBRF	protein_coding	1747.3	0.471249	4.03589	5.43953e-05	0.000926473
ENSG00000154813	DPH3	protein_coding	532.76	0.42247	4.03454	5.47091e-05	0.000930707
ENSG00000140563	MCTP2	protein_coding	1809.22	0.573847	4.03286	5.51031e-05	0.000936293
ENSG00000165879	FRAT1	protein_coding	3048.92	0.487105	4.03231	5.52301e-05	0.000937336
ENSG00000196139	AKR1C3	protein_coding	164.213	-0.69352	-4.03121	5.54913e-05	0.000940651
ENSG00000030582	GRN	protein_coding	17289.9	0.428785	4.02851	5.61324e-05	0.000943673
ENSG00000125630	POLR1B	protein_coding	413.534	-0.445093	-4.02933	5.59368e-05	0.000943673
ENSG00000134046	MBD2	protein_coding	2327.9	0.302884	4.02862	5.61058e-05	0.000943673
ENSG00000183134	PTGDR2	protein_coding	451.885	-0.547245	-4.03009	5.57551e-05	0.000943673
ENSG00000196700	ZNF512B	protein_coding	361.085	-0.447828	-4.0287	5.60861e-05	0.000943673
ENSG00000261371	PECAM1	protein_coding	20072.2	0.49744	4.02946	5.59041e-05	0.000943673
ENSG00000273272	CTA-384D8.34	lincRNA	81.6766	0.747047	4.02944	5.59109e-05	0.000943673
ENSG00000000938	FGR	protein_coding	18255.6	0.389118	4.02742	5.63922e-05	0.000946601
ENSG00000065243	PKN2	protein_coding	1052.23	0.579334	4.02722	5.64393e-05	0.000946601
ENSG00000119048	UBE2B	protein_coding	2045.45	0.411208	4.02588	5.67622e-05	0.000949785
ENSG00000130590	SAMD10	protein_coding	165.052	-0.727705	-4.02594	5.67479e-05	0.000949785
ENSG00000116017	ARID3A	protein_coding	2228.65	0.703514	4.02402	5.72132e-05	0.00095621
ENSG00000105366	SIGLEC8	protein_coding	96.9729	-0.830638	-4.02269	5.7537e-05	0.000960498
ENSG00000105856	HBP1	protein_coding	3673.15	0.440103	4.02173	5.77721e-05	0.000960512
ENSG00000140396	NCOA2	protein_coding	2148.45	0.463708	4.02159	5.78071e-05	0.000960512
ENSG00000170759	KIF5B	protein_coding	1671.83	0.370542	4.02174	5.77692e-05	0.000960512
ENSG00000181444	ZNF467	protein_coding	4090.69	0.541004	4.0221	5.76806e-05	0.000960512
ENSG00000172765	TMCC1	protein_coding	1904.97	0.539618	4.02102	5.79475e-05	0.000961727
ENSG00000162144	CYB561A3	protein_coding	2135.29	-0.305429	-4.02052	5.80708e-05	0.000962653
ENSG00000148730	EIF4EBP2	protein_coding	5263.18	0.333264	4.01999	5.82015e-05	0.000963701
ENSG00000170832	USP32	protein_coding	2688.64	0.586016	4.01938	5.83509e-05	0.000965055
ENSG00000104419	NDRG1	protein_coding	3062.84	0.299649	4.01814	5.86599e-05	0.000969043
ENSG00000136699	SMPD4	protein_coding	905.959	-0.331447	-4.01762	5.87889e-05	0.000970051
ENSG00000134531	EMP1	protein_coding	48.5991	1.14176	4.01689	5.89713e-05	0.000971937
ENSG00000008056	SYN1	protein_coding	15.5079	1.71101	4.01544	5.93341e-05	0.000976789
ENSG00000005483	KMT2E	protein_coding	3248.4	0.363192	4.0124	6.01038e-05	0.000986102
ENSG00000113532	ST8SIA4	protein_coding	2909	0.481076	4.01239	6.01071e-05	0.000986102
ENSG00000121064	SCPEP1	protein_coding	2480.18	0.367021	4.01266	6.00378e-05	0.000986102
ENSG00000123329	ARHGAP9	protein_coding	12158.4	0.648833	4.01136	6.0369e-05	0.000989261
ENSG00000198771	RCSD1	protein_coding	6578.87	0.359683	4.01098	6.04667e-05	0.000989726
ENSG00000283907	LLNLF-96A1.1	antisense	23.1579	-1.8391	-4.00886	6.10128e-05	0.000997521
ENSG00000178726	THBD	protein_coding	1362.47	0.585788	4.00787	6.12685e-05	0.00100037
ENSG00000188322	SBK1	protein_coding	780.029	-0.503985	-4.00764	6.13273e-05	0.00100037
ENSG00000136536	2021-03-07	protein_coding	2403.91	0.412782	4.00651	6.16229e-05	0.00100404
ENSG00000125877	ITPA	protein_coding	460.707	-0.456076	-4.00596	6.17669e-05	0.00100524
ENSG00000134248	LAMTOR5	protein_coding	975.049	0.326304	4.00468	6.21027e-05	0.00100956
ENSG00000197852	FAM212B	protein_coding	4312.29	0.64464	4.00369	6.23632e-05	0.00101149
ENSG00000214274	ANG	protein_coding	57.1352	0.850144	4.00394	6.22954e-05	0.00101149
ENSG00000111275	ALDH2	protein_coding	1906.49	0.444697	4.00189	6.28387e-05	0.00101804
ENSG00000170653	ATF7	protein_coding	779.073	0.332772	4.00142	6.29641e-05	0.00101892
ENSG00000182472	CAPN12	protein_coding	138.872	-0.549995	-3.99752	6.40105e-05	0.00103468
ENSG00000186350	RXRA	protein_coding	10140.3	0.532962	3.9966	6.426e-05	0.00103754
ENSG00000174125	TLR1	protein_coding	2558.75	0.540957	3.99601	6.442e-05	0.00103845
ENSG00000180596	HIST1H2BC	protein_coding	545	0.54391	3.99585	6.44617e-05	0.00103845
ENSG00000100100	PIK3IP1	protein_coding	4458.51	-0.383316	-3.99493	6.4712e-05	0.0010413
ENSG00000184584	TMEM173	protein_coding	2023.44	-0.323104	-3.99378	6.50281e-05	0.00104521
ENSG00000138069	RAB1A	protein_coding	1647.28	0.340966	3.99266	6.53357e-05	0.00104779
ENSG00000162614	NEXN	protein_coding	83.5497	0.702791	3.99276	6.53091e-05	0.00104779
ENSG00000102531	FNDC3A	protein_coding	829.064	0.40874	3.99194	6.55358e-05	0.00104865
ENSG00000155111	CDK19	protein_coding	1182.72	0.517688	3.992	6.55177e-05	0.00104865
ENSG00000249662	LINC02218	lincRNA	32.7302	1.22862	3.99125	6.5725e-05	0.0010505
ENSG00000283782	AC116366.7	protein_coding	59.7165	-4.95899	-3.9908	6.58514e-05	0.00105134
ENSG00000267519	CTD-3252C9.4	lincRNA	677.123	1.25476	3.99033	6.59821e-05	0.00105225
ENSG00000086666	ZFAND6	protein_coding	1194.09	0.307787	3.98929	6.62714e-05	0.00105568
ENSG00000133816	MICAL2	protein_coding	3416.45	0.449993	3.98882	6.64037e-05	0.00105661
ENSG00000204237	OXLD1	protein_coding	437.994	-0.460847	-3.9881	6.66043e-05	0.00105862
ENSG00000148840	PPRC1	protein_coding	588.932	-0.361654	-3.98761	6.6742e-05	0.00105963
ENSG00000198160	MIER1	protein_coding	1231.25	0.388843	3.98668	6.70053e-05	0.00106263
ENSG00000146457	WTAP	protein_coding	2330.53	0.271977	3.98574	6.72699e-05	0.00106564
ENSG00000111424	VDR	protein_coding	1050.08	0.559052	3.98244	6.82107e-05	0.00107935
ENSG00000048052	HDAC9	protein_coding	326.531	-0.503991	-3.98032	6.88215e-05	0.00108781
ENSG00000162645	GBP2	protein_coding	8248.01	0.454483	3.97917	6.91576e-05	0.00109191
ENSG00000117586	TNFSF4	protein_coding	142.628	0.566947	3.9782	6.94389e-05	0.00109514
ENSG00000166913	YWHAB	protein_coding	9152.43	0.297807	3.97777	6.95645e-05	0.00109591
ENSG00000163840	DTX3L	protein_coding	2786.88	0.369144	3.97666	6.98889e-05	0.00109981
ENSG00000232434	C9orf172	protein_coding	161.778	-0.70298	-3.9747	7.04672e-05	0.00110769
ENSG00000168497	SDPR	protein_coding	2450.69	0.417485	3.97225	7.11981e-05	0.00111794
ENSG00000179604	CDC42EP4	protein_coding	333.803	0.567396	3.97172	7.13567e-05	0.0011192
ENSG00000136059	VILL	protein_coding	422.262	-0.381271	-3.96952	7.20188e-05	0.00112835
ENSG00000090006	LTBP4	protein_coding	639.573	-0.447261	-3.9689	7.22039e-05	0.00112968
ENSG00000103932	RPAP1	protein_coding	433.092	-0.364793	-3.96871	7.22619e-05	0.00112968
ENSG00000114784	EIF1B	protein_coding	1008.72	0.473723	3.96767	7.25781e-05	0.00113326
ENSG00000131100	ATP6V1E1	protein_coding	3089.8	0.331768	3.96744	7.26499e-05	0.00113326
ENSG00000149541	B3GAT3	protein_coding	774.336	-0.376074	-3.96544	7.32605e-05	0.00114029
ENSG00000180921	FAM83H	protein_coding	69.7188	-0.932515	-3.96557	7.322e-05	0.00114029
ENSG00000234975	FTH1P2	processed_pseudogene	47.8718	0.908296	3.96403	7.36963e-05	0.00114583
ENSG00000167747	C19orf48	protein_coding	306.34	-0.510117	-3.96362	7.3821e-05	0.00114651
ENSG00000140455	USP3	protein_coding	2152.26	0.411324	3.96268	7.41121e-05	0.0011486
ENSG00000273136	NBPF26	protein_coding	552.798	0.409867	3.96267	7.4116e-05	0.0011486
ENSG00000130449	ZSWIM6	protein_coding	699.714	0.48272	3.962	7.43243e-05	0.00114989
ENSG00000177324	BEND2	protein_coding	171.014	0.642983	3.96188	7.43608e-05	0.00114989
ENSG00000268734	CTB-61M7.2	lincRNA	176.226	0.911787	3.96067	7.47391e-05	0.00115449
ENSG00000155465	SLC7A7	protein_coding	3103.23	0.344836	3.95991	7.49789e-05	0.00115694
ENSG00000275302	CCL4	protein_coding	619.456	-0.547964	-3.95938	7.51457e-05	0.00115827
ENSG00000107863	ARHGAP21	protein_coding	475.356	0.366089	3.9591	7.52337e-05	0.00115837
ENSG00000198736	MSRB1	protein_coding	12307.4	0.518159	3.9586	7.53911e-05	0.00115954
ENSG00000160963	COL26A1	protein_coding	42.1899	-1.25628	-3.95689	7.59319e-05	0.0011666
ENSG00000095015	MAP3K1	protein_coding	2691.47	0.29855	3.95566	7.63229e-05	0.00117135
ENSG00000103187	COTL1	protein_coding	32546.4	0.349643	3.95427	7.67692e-05	0.00117693
ENSG00000257878	RP11-256L6.3	antisense	176.347	0.797167	3.95285	7.72245e-05	0.00118265
ENSG00000174721	FGFBP3	protein_coding	28.0883	-1.27464	-3.9517	7.75995e-05	0.00118712
ENSG00000162711	NLRP3	protein_coding	853.086	0.395442	3.94981	7.82126e-05	0.00119393
ENSG00000182831	C16orf72	protein_coding	4590.1	0.45743	3.94993	7.81729e-05	0.00119393
ENSG00000183486	MX2	protein_coding	5337.99	0.515987	3.9473	7.90378e-05	0.00120524
ENSG00000197249	SERPINA1	protein_coding	30773.5	0.479711	3.9469	7.91695e-05	0.00120596
ENSG00000187621	TCL6	processed_transcript	79.3933	-0.758927	-3.94551	7.96312e-05	0.0012117
ENSG00000184436	THAP7	protein_coding	464.283	-0.427063	-3.94058	8.12857e-05	0.00123556
ENSG00000141279	NPEPPS	protein_coding	2563.47	0.545531	3.94007	8.14577e-05	0.00123686
ENSG00000129657	SEC14L1	protein_coding	17050.8	0.599782	3.9398	8.15493e-05	0.00123693
ENSG00000112062	MAPK14	protein_coding	4447.64	0.491623	3.93907	8.17993e-05	0.00123941
ENSG00000132510	KDM6B	protein_coding	10167.7	0.680002	3.93822	8.20869e-05	0.00124245
ENSG00000186364	NUDT17	protein_coding	42.8511	-0.939552	-3.93479	8.3271e-05	0.00125903
ENSG00000006555	TTC22	protein_coding	257.437	-0.46416	-3.93418	8.34825e-05	0.00125948
ENSG00000153898	MCOLN2	protein_coding	91.0549	-0.656414	-3.93394	8.35651e-05	0.00125948
ENSG00000160094	ZNF362	protein_coding	598.881	-0.326213	-3.93403	8.35321e-05	0.00125948
ENSG00000125731	SH2D3A	protein_coding	297.992	-0.461754	-3.93325	8.38041e-05	0.00126042
ENSG00000244617	ASPRV1	protein_coding	421.467	0.65172	3.93329	8.37908e-05	0.00126042
ENSG00000167460	TPM4	protein_coding	5979.91	0.283422	3.93032	8.48325e-05	0.00127186
ENSG00000185201	IFITM2	protein_coding	84304.3	0.557606	3.93079	8.46662e-05	0.00127186
ENSG00000204577	LILRB3	protein_coding	9722.48	0.63256	3.93034	8.48258e-05	0.00127186
ENSG00000101150	TPD52L2	protein_coding	5362.57	0.468448	3.92903	8.52878e-05	0.00127735
ENSG00000100030	MAPK1	protein_coding	6563.98	0.369233	3.92579	8.64456e-05	0.00129333
ENSG00000100365	NCF4	protein_coding	8755.55	0.677695	3.92548	8.65555e-05	0.00129362
ENSG00000158615	PPP1R15B	protein_coding	1908.42	0.375655	3.92366	8.72156e-05	0.00130212
ENSG00000206190	ATP10A	protein_coding	406.324	-0.473747	-3.92325	8.73634e-05	0.00130297
ENSG00000204634	TBC1D8	protein_coding	472.118	0.430737	3.92227	8.7717e-05	0.00130687
ENSG00000151023	ENKUR	protein_coding	152.705	0.629153	3.92183	8.78794e-05	0.00130793
ENSG00000134864	GGACT	protein_coding	67.1	-0.739319	-3.92126	8.80874e-05	0.00130966
ENSG00000073921	PICALM	protein_coding	8108.03	0.509591	3.92071	8.82874e-05	0.00131127
ENSG00000142082	SIRT3	protein_coding	234.309	-0.434822	-3.91983	8.86108e-05	0.0013147
ENSG00000204427	ABHD16A	protein_coding	1623.59	0.402677	3.91866	8.90421e-05	0.00131973
ENSG00000141994	DUS3L	protein_coding	443.084	-0.41244	-3.91736	8.95226e-05	0.00132299
ENSG00000151151	IPMK	protein_coding	739.889	0.561204	3.91732	8.95402e-05	0.00132299
ENSG00000164144	ARFIP1	protein_coding	866.286	0.385707	3.91781	8.93583e-05	0.00132299
ENSG00000188158	NHS	protein_coding	225.245	0.752104	3.91478	9.04849e-05	0.00133556
ENSG00000084676	NCOA1	protein_coding	3597.9	0.467198	3.91294	9.11803e-05	0.00134444
ENSG00000116133	DHCR24	protein_coding	154.216	-0.639251	-3.91257	9.13172e-05	0.00134507
ENSG00000162444	RBP7	protein_coding	832.463	0.59439	3.91063	9.20569e-05	0.00135457
ENSG00000067066	SP100	protein_coding	2970.73	0.339458	3.90955	9.2469e-05	0.00135923
ENSG00000154529	CNTNAP3B	protein_coding	74.4675	0.988921	3.90903	9.26666e-05	0.00136073
ENSG00000224877	NDUFAF8	protein_coding	180.748	-0.653996	-3.9084	9.29085e-05	0.00136288
ENSG00000133256	PDE6B	protein_coding	90.7533	-0.62315	-3.90764	9.32031e-05	0.0013658
ENSG00000111276	CDKN1B	protein_coding	3689.46	0.289234	3.90685	9.3509e-05	0.00136888
ENSG00000182022	CHST15	protein_coding	6628.2	0.666576	3.90528	9.41153e-05	0.00137634
ENSG00000072864	NDE1	protein_coding	2987.46	0.545818	3.90469	9.43466e-05	0.00137831
ENSG00000105298	CACTIN	protein_coding	733.483	-0.306778	-3.90366	9.47497e-05	0.00138278
ENSG00000139505	MTMR6	protein_coding	1043.15	0.429862	3.90212	9.53521e-05	0.00139015
ENSG00000142687	KIAA0319L	protein_coding	2244.7	0.545208	3.90173	9.55077e-05	0.001391
ENSG00000169403	PTAFR	protein_coding	15118.9	0.58068	3.90067	9.59268e-05	0.00139568
ENSG00000105887	MTPN	protein_coding	6018.51	0.344667	3.89891	9.66268e-05	0.00140301
ENSG00000136167	LCP1	protein_coding	78667	0.442864	3.899	9.65896e-05	0.00140301
ENSG00000164047	CAMP	protein_coding	530.045	0.675256	3.89847	9.6803e-05	0.00140414
ENSG00000130810	PPAN	protein_coding	460.372	-0.430491	-3.89431	9.84769e-05	0.00142696
ENSG00000183044	ABAT	protein_coding	1023.62	0.65118	3.89399	9.86097e-05	0.00142744
ENSG00000183889	AC138969.4	protein_coding	962.477	-0.399303	-3.89322	9.89224e-05	0.00143052
ENSG00000100726	TELO2	protein_coding	641.084	-0.356127	-3.8926	9.91755e-05	0.00143062
ENSG00000126883	NUP214	protein_coding	3362	0.385391	3.8925	9.92146e-05	0.00143062
ENSG00000256043	CTSO	protein_coding	444.664	-0.484145	-3.89247	9.92301e-05	0.00143062
ENSG00000180304	OAZ2	protein_coding	7347.19	0.465015	3.89133	9.96975e-05	0.00143591
ENSG00000048392	RRM2B	protein_coding	1005.8	0.485617	3.89082	9.99071e-05	0.00143747
ENSG00000134107	BHLHE40	protein_coding	2103.12	0.378859	3.88952	0.000100444	0.00144374
ENSG00000181852	RNF41	protein_coding	1307.76	0.284122	3.88821	0.000100988	0.00145011
ENSG00000152795	HNRNPDL	protein_coding	2514.54	-0.319557	-3.88727	0.00010138	0.00145427
ENSG00000008438	PGLYRP1	protein_coding	1277.05	0.756371	3.88636	0.00010176	0.00145712
ENSG00000198743	SLC5A3	protein_coding	290.506	0.456475	3.8863	0.000101783	0.00145712
ENSG00000077721	UBE2A	protein_coding	990.764	0.327402	3.885	0.000102332	0.0014635
ENSG00000005339	CREBBP	protein_coding	6341.24	0.561973	3.88179	0.000103688	0.00148143
ENSG00000141027	NCOR1	protein_coding	2924.47	0.272432	3.88055	0.000104219	0.00148751
ENSG00000135632	SMYD5	protein_coding	358.766	-0.528296	-3.8787	0.000105016	0.0014974
ENSG00000130787	HIP1R	protein_coding	777.075	-0.362852	-3.87708	0.000105717	0.00150439
ENSG00000136816	TOR1B	protein_coding	801.979	0.375386	3.87714	0.00010569	0.00150439
ENSG00000119138	KLF9	protein_coding	424.117	-0.42585	-3.87628	0.000106068	0.00150787
ENSG00000233730	LINC01765	lincRNA	26.1693	1.2898	3.87571	0.000106313	0.00150985
ENSG00000182173	TSEN54	protein_coding	668.522	-0.367425	-3.87521	0.000106534	0.0015115
ENSG00000170296	GABARAP	protein_coding	15438.3	0.368908	3.87412	0.000107012	0.00151676
ENSG00000089902	RCOR1	protein_coding	2107.99	0.543865	3.87291	0.000107543	0.00152211
ENSG00000140612	SEC11A	protein_coding	2008.89	0.305717	3.87278	0.000107602	0.00152211
ENSG00000119900	OGFRL1	protein_coding	7050.98	0.538173	3.87213	0.000107886	0.00152461
ENSG00000066084	DIP2B	protein_coding	2130.16	0.47996	3.87177	0.000108048	0.00152539
ENSG00000162889	MAPKAPK2	protein_coding	4675.43	0.410069	3.87146	0.000108184	0.00152579
ENSG00000059122	FLYWCH1	protein_coding	732.094	-0.53153	-3.86826	0.000109613	0.00154442
ENSG00000155926	SLA	protein_coding	12507.8	0.454778	3.86765	0.000109889	0.00154679
ENSG00000146278	PNRC1	protein_coding	7332.32	0.406103	3.86587	0.000110693	0.00155657
ENSG00000101082	SLA2	protein_coding	1292.13	0.362829	3.86171	0.000112595	0.00158065
ENSG00000121060	TRIM25	protein_coding	4214.77	0.602142	3.86164	0.000112627	0.00158065
ENSG00000118680	MYL12B	protein_coding	7972.42	0.263754	3.86022	0.000113287	0.00158682
ENSG00000183255	PTTG1IP	protein_coding	4470.71	0.380188	3.86021	0.000113289	0.00158682
ENSG00000120915	EPHX2	protein_coding	273.635	-0.479271	-3.85955	0.000113595	0.00158955
ENSG00000116350	SRSF4	protein_coding	2347.96	0.341341	3.85834	0.000114158	0.00159138
ENSG00000123562	MORF4L2	protein_coding	837.77	0.330363	3.85876	0.000113962	0.00159138
ENSG00000136560	TANK	protein_coding	1701.09	0.372807	3.85899	0.000113858	0.00159138
ENSG00000150991	UBC	protein_coding	50008.8	0.277039	3.85832	0.000114171	0.00159138
ENSG00000006652	IFRD1	protein_coding	1537.16	0.597119	3.85225	0.000117039	0.00162976
ENSG00000123908	AGO2	protein_coding	1586.12	0.500561	3.84939	0.000118413	0.00164728
ENSG00000277496	RP11-93B14.9	antisense	179.443	-0.499191	-3.84814	0.00011902	0.00165411
ENSG00000084110	HAL	protein_coding	1881.64	0.687706	3.84768	0.000119242	0.00165558
ENSG00000099875	MKNK2	protein_coding	11958	0.482365	3.84568	0.000120219	0.00166752
ENSG00000174175	SELP	protein_coding	201.825	0.576254	3.84494	0.000120582	0.00167093
ENSG00000226137	BAIAP2-AS1	lincRNA	667.916	0.417676	3.84409	0.000121	0.00167511
ENSG00000214413	BBIP1	protein_coding	319.989	0.395122	3.84206	0.000122005	0.00168738
ENSG00000133961	NUMB	protein_coding	8707.22	0.510077	3.84148	0.000122293	0.00168973
ENSG00000120129	DUSP1	protein_coding	12499	0.566222	3.84061	0.000122729	0.00169362
ENSG00000145649	GZMA	protein_coding	2026.81	-0.596996	-3.84044	0.000122812	0.00169362
ENSG00000109586	GALNT7	protein_coding	547.694	0.416937	3.83996	0.000123055	0.00169533
ENSG00000127947	PTPN12	protein_coding	2422.47	0.425449	3.8364	0.000124853	0.00171845
ENSG00000086730	LAT2	protein_coding	6826.04	0.528329	3.83577	0.00012517	0.00172115
ENSG00000102010	BMX	protein_coding	208.175	0.978017	3.83534	0.000125392	0.00172254
ENSG00000130768	SMPDL3B	protein_coding	34.2453	1.11558	3.83505	0.000125537	0.00172287
ENSG00000156639	ZFAND3	protein_coding	3353.08	0.412114	3.83412	0.000126012	0.00172608
ENSG00000160284	SPATC1L	protein_coding	133.663	-0.58196	-3.83414	0.000126005	0.00172608
ENSG00000128383	APOBEC3A	protein_coding	3421.05	0.650541	3.83389	0.000126134	0.00172609
ENSG00000103994	ZNF106	protein_coding	2941.13	0.468326	3.8329	0.000126642	0.00172972
ENSG00000137449	CPEB2	protein_coding	490.603	0.519376	3.83311	0.000126533	0.00172972
ENSG00000013441	CLK1	protein_coding	2421.64	0.497058	3.83131	0.000127463	0.00173927
ENSG00000166478	ZNF143	protein_coding	712.872	0.302428	3.8307	0.000127781	0.00174195
ENSG00000029363	BCLAF1	protein_coding	2192.96	0.28131	3.82954	0.000128382	0.00174681
ENSG00000145012	LPP	protein_coding	689.508	0.393643	3.82967	0.000128314	0.00174681
ENSG00000139428	MMAB	protein_coding	139.042	-0.587452	-3.8293	0.00012851	0.00174688
ENSG00000185163	DDX51	protein_coding	376.913	-0.379661	-3.82856	0.000128897	0.00175047
ENSG00000058668	ATP2B4	protein_coding	2694.31	0.258624	3.8263	0.000130085	0.00176321
ENSG00000111707	SUDS3	protein_coding	1095.9	0.312027	3.82607	0.000130205	0.00176321
ENSG00000162512	SDC3	protein_coding	87.6318	0.813454	3.82624	0.000130116	0.00176321
ENSG00000278619	MRM1	protein_coding	127.692	-0.609923	-3.82439	0.000131097	0.0017736
ENSG00000113140	SPARC	protein_coding	3752.2	0.411642	3.82344	0.000131602	0.00177875
ENSG00000005379	TSPOAP1	protein_coding	496.21	-0.653077	-3.82308	0.000131798	0.0017797
ENSG00000143418	CERS2	protein_coding	4148.63	0.343665	3.82234	0.000132191	0.00178175
ENSG00000148411	NACC2	protein_coding	2058.35	0.481847	3.82233	0.000132199	0.00178175
ENSG00000073910	FRY	protein_coding	1663.35	0.57035	3.82142	0.000132684	0.0017866
ENSG00000099958	DERL3	protein_coding	265.184	-0.546033	-3.8202	0.000133344	0.0017938
ENSG00000108510	MED13	protein_coding	1287.52	0.338761	3.81937	0.000133791	0.00179812
ENSG00000197965	MPZL1	protein_coding	2445.23	0.551176	3.81885	0.000134075	0.00179855
ENSG00000198055	GRK6	protein_coding	8052.84	0.336268	3.81894	0.000134025	0.00179855
ENSG00000118900	UBN1	protein_coding	7321.04	0.59991	3.81808	0.000134495	0.00180249
ENSG00000213658	LAT	protein_coding	2334.07	-0.347823	-3.81647	0.000135372	0.00181084
ENSG00000238083	LRRC37A2	protein_coding	359.816	0.424974	3.81657	0.000135321	0.00181084
ENSG00000008086	CDKL5	protein_coding	308.275	0.628259	3.81313	0.000137217	0.0018325
ENSG00000154134	ROBO3	protein_coding	109.955	-0.659671	-3.81308	0.000137248	0.0018325
ENSG00000183283	DAZAP2	protein_coding	21926.5	0.403691	3.81269	0.000137461	0.00183362
ENSG00000185585	OLFML2A	protein_coding	14.6106	-1.5812	-3.81091	0.000138456	0.00184346
ENSG00000272734	ADIRF-AS1	processed_transcript	32.5455	-1.1303	-3.81092	0.000138448	0.00184346
ENSG00000124762	CDKN1A	protein_coding	823.874	0.350759	3.81012	0.000138899	0.00184705
ENSG00000128245	YWHAH	protein_coding	1761.9	0.282541	3.80997	0.000138985	0.00184705
ENSG00000011105	TSPAN9	protein_coding	200.79	0.496426	3.8078	0.000140207	0.00186033
ENSG00000140543	DET1	protein_coding	94.7483	-0.716916	-3.80769	0.000140271	0.00186033
ENSG00000196329	GIMAP5	protein_coding	2504.26	-0.502101	-3.80751	0.000140375	0.00186033
ENSG00000169826	CSGALNACT2	protein_coding	1488.38	0.374318	3.8067	0.000140835	0.00186469
ENSG00000092020	PPP2R3C	protein_coding	630.561	0.466422	3.80592	0.000141275	0.0018659
ENSG00000156642	NPTN	protein_coding	2185.9	0.345625	3.80585	0.000141318	0.0018659
ENSG00000196743	GM2A	protein_coding	1433.8	0.353994	3.80592	0.000141281	0.0018659
ENSG00000148362	C9orf142	protein_coding	816.618	-0.442086	-3.80522	0.000141679	0.00186893
ENSG00000012124	CD22	protein_coding	1543.39	-0.39719	-3.80365	0.00014258	0.00187908
ENSG00000244482	LILRA6	protein_coding	2153.31	0.665827	3.80311	0.000142891	0.00188144
ENSG00000138463	DIRC2	protein_coding	286.943	0.468218	3.79947	0.000145007	0.00190578
ENSG00000164674	SYTL3	protein_coding	1199.25	0.427941	3.79953	0.00014497	0.00190578
ENSG00000139083	ETV6	protein_coding	1448.31	0.480378	3.7981	0.000145811	0.0019146
ENSG00000128487	SPECC1	protein_coding	696.24	0.452309	3.79667	0.000146656	0.00192391
ENSG00000157107	FCHO2	protein_coding	496.696	0.501982	3.79568	0.000147237	0.00192977
ENSG00000221914	PPP2R2A	protein_coding	959.543	0.326817	3.79502	0.000147634	0.00193319
ENSG00000158195	WASF2	protein_coding	7866.78	0.344521	3.79279	0.000148963	0.00194881
ENSG00000111859	NEDD9	protein_coding	3609.97	0.442645	3.7904	0.000150405	0.00196587
ENSG00000077420	APBB1IP	protein_coding	7767.27	0.499882	3.78935	0.00015104	0.00197236
ENSG00000163681	SLMAP	protein_coding	940.072	0.310389	3.78906	0.000151217	0.00197287
ENSG00000090554	FLT3LG	protein_coding	1218.83	-0.400906	-3.7877	0.00015205	0.00198193
ENSG00000101367	MAPRE1	protein_coding	2864.81	0.269982	3.78566	0.000153298	0.00199638
ENSG00000180644	PRF1	protein_coding	9063.92	-0.485383	-3.78517	0.000153604	0.00199853
ENSG00000231412	CTC-490G23.2	lincRNA	56.2377	1.14394	3.78488	0.000153786	0.00199907
ENSG00000137843	PAK6	protein_coding	29.7733	-1.2841	-3.78444	0.000154056	0.00200076
ENSG00000146112	PPP1R18	protein_coding	17135.9	0.456894	3.78407	0.000154285	0.00200192
ENSG00000282988	HIST1H3D	protein_coding	143.323	0.744867	3.78335	0.000154732	0.0020059
ENSG00000072694	FCGR2B	protein_coding	1745.16	0.424752	3.78232	0.000155372	0.00201017
ENSG00000088881	EBF4	protein_coding	43.9305	-0.941493	-3.78218	0.000155459	0.00201017
ENSG00000152207	CYSLTR2	protein_coding	236.831	0.419253	3.78214	0.000155484	0.00201017
ENSG00000213085	CFAP45	protein_coding	132.138	0.770751	3.78106	0.000156164	0.00201713
ENSG00000156398	SFXN2	protein_coding	78.9703	-0.711421	-3.78016	0.000156727	0.00202257
ENSG00000167461	RAB8A	protein_coding	3579.26	0.316759	3.77993	0.000156873	0.00202263
ENSG00000196154	S100A4	protein_coding	15456.7	0.348402	3.77757	0.000158364	0.00204001
ENSG00000185245	GP1BA	protein_coding	169.74	0.643512	3.77699	0.000158736	0.00204296
ENSG00000101079	NDRG3	protein_coding	1108.86	0.295033	3.77564	0.000159595	0.00205031
ENSG00000152242	C18orf25	protein_coding	774.742	0.334366	3.77565	0.000159589	0.00205031
ENSG00000115255	REEP6	protein_coding	53.2085	-0.904521	-3.77495	0.00016004	0.00205418
ENSG00000100503	NIN	protein_coding	4206.82	0.420712	3.7746	0.000160266	0.00205524
ENSG00000158941	CCAR2	protein_coding	2324.94	-0.243941	-3.77424	0.000160498	0.00205636
ENSG00000280734	LINC01232	processed_transcript	123.77	0.729403	3.77375	0.000160809	0.0020585
ENSG00000065613	SLK	protein_coding	1477.74	0.297517	3.7734	0.000161036	0.00205956
ENSG00000174917	C19orf70	protein_coding	385.6	-0.405449	-3.77165	0.000162173	0.00207225
ENSG00000006744	ELAC2	protein_coding	808.029	-0.334895	-3.77101	0.000162586	0.00207566
ENSG00000111684	LPCAT3	protein_coding	882.502	0.322495	3.77021	0.000163108	0.00208047
ENSG00000197747	S100A10	protein_coding	3705.49	0.390276	3.76974	0.00016342	0.00208258
ENSG00000185298	CCDC137	protein_coding	471.489	-0.345879	-3.76907	0.00016386	0.00208632
ENSG00000038219	BOD1L1	protein_coding	4438.3	0.537871	3.76683	0.000165334	0.00210321
ENSG00000129968	ABHD17A	protein_coding	4613.08	-0.355516	-3.7664	0.000165618	0.00210496
ENSG00000105426	PTPRS	protein_coding	155.384	-0.654166	-3.76546	0.000166245	0.00211104
ENSG00000133250	ZNF414	protein_coding	248.74	-0.425954	-3.76523	0.000166397	0.00211109
ENSG00000147548	NSD3	protein_coding	2524.7	0.294927	3.76452	0.000166871	0.00211335
ENSG00000161642	ZNF385A	protein_coding	2114.38	0.419023	3.76469	0.000166755	0.00211335
ENSG00000135926	TMBIM1	protein_coding	5753.17	0.336334	3.76364	0.000167455	0.00211699
ENSG00000163960	UBXN7	protein_coding	1031.12	0.380354	3.76377	0.00016737	0.00211699
ENSG00000135083	CCNJL	protein_coding	1749.36	0.621939	3.76149	0.000168903	0.00213341
ENSG00000173930	SLCO4C1	protein_coding	542.284	0.609854	3.76082	0.000169354	0.00213721
ENSG00000179978	RP11-1319K7.1	unprocessed_pseudogene	198.711	0.645889	3.7596	0.000170186	0.00214582
ENSG00000136404	TM6SF1	protein_coding	624.196	0.558847	3.75896	0.000170618	0.00214626
ENSG00000153310	FAM49B	protein_coding	5659.43	0.371254	3.75913	0.000170503	0.00214626
ENSG00000242110	AMACR	protein_coding	240.123	0.599217	3.75888	0.000170672	0.00214626
ENSG00000177192	PUS1	protein_coding	324.267	-0.403745	-3.75848	0.000170951	0.00214787
ENSG00000177105	RHOG	protein_coding	11711.9	0.44284	3.75744	0.000171661	0.00215489
ENSG00000110315	RNF141	protein_coding	1795.63	0.411832	3.75691	0.000172025	0.00215757
ENSG00000162704	ARPC5	protein_coding	8480.85	0.349415	3.75558	0.000172938	0.00215953
ENSG00000171791	BCL2	protein_coding	1317.66	-0.481803	-3.75593	0.000172701	0.00215953
ENSG00000184897	H1FX	protein_coding	2866.94	-0.409632	-3.75574	0.000172829	0.00215953
ENSG00000185787	MORF4L1	protein_coding	4461.28	0.263309	3.75599	0.000172656	0.00215953
ENSG00000196684	HSH2D	protein_coding	4995.68	0.538302	3.75574	0.000172832	0.00215953
ENSG00000115561	CHMP3	protein_coding	3082.65	0.329278	3.75496	0.000173373	0.00216306
ENSG00000115507	OTX1	protein_coding	111.467	0.886962	3.75436	0.000173785	0.00216443
ENSG00000277972	CISD3	protein_coding	346.596	-0.536255	-3.75452	0.000173673	0.00216443
ENSG00000204020	LIPN	protein_coding	117.317	0.687914	3.75403	0.000174016	0.00216541
ENSG00000166710	B2M	protein_coding	210678	0.31004	3.75349	0.000174391	0.00216819
ENSG00000059588	TARBP1	protein_coding	305.974	-0.416109	-3.75261	0.000175002	0.00217241
ENSG00000064932	SBNO2	protein_coding	7826.28	0.575751	3.75247	0.000175102	0.00217241
ENSG00000179456	ZBTB18	protein_coding	2317.02	0.478492	3.75235	0.000175187	0.00217241
ENSG00000185591	SP1	protein_coding	5069.67	0.427496	3.75104	0.000176104	0.00218188
ENSG00000155849	ELMO1	protein_coding	2391.46	0.390567	3.75031	0.000176615	0.00218632
ENSG00000109787	KLF3	protein_coding	4052.8	0.376944	3.74931	0.00017732	0.00219125
ENSG00000130303	BST2	protein_coding	1897.5	0.280997	3.74941	0.000177248	0.00219125
ENSG00000176463	SLCO3A1	protein_coding	2740.48	0.45063	3.74845	0.000177929	0.00219687
ENSG00000077348	EXOSC5	protein_coding	264.074	-0.492431	-3.7471	0.000178894	0.00220687
ENSG00000075275	CELSR1	protein_coding	159.736	-0.526355	-3.74683	0.000179082	0.00220728
ENSG00000179869	ABCA13	protein_coding	20.6541	1.2271	3.74627	0.000179486	0.00220882
ENSG00000256235	SMIM3	protein_coding	625.844	0.45751	3.74622	0.000179516	0.00220882
ENSG00000105656	ELL	protein_coding	2572.14	0.564537	3.74566	0.000179918	0.00220996
ENSG00000137274	BPHL	protein_coding	57.4065	-0.86345	-3.74568	0.000179908	0.00220996
ENSG00000157483	MYO1E	protein_coding	224.925	-0.593414	-3.74532	0.000180162	0.00221105
ENSG00000089505	CMTM1	protein_coding	142.001	0.895546	3.74398	0.000181125	0.00222096
ENSG00000123838	C4BPA	protein_coding	328.296	0.793309	3.74371	0.00018132	0.00222144
ENSG00000188690	UROS	protein_coding	367.909	-0.402933	-3.73929	0.000184543	0.00225899
ENSG00000184014	DENND5A	protein_coding	6900.75	0.480873	3.73903	0.000184733	0.00225938
ENSG00000155827	RNF20	protein_coding	1488.52	0.283896	3.73834	0.00018524	0.00226364
ENSG00000049246	PER3	protein_coding	94.1875	-0.692786	-3.73727	0.000186029	0.00227133
ENSG00000143753	DEGS1	protein_coding	1351.06	0.376942	3.73693	0.00018628	0.00227245
ENSG00000005238	FAM214B	protein_coding	2863.18	0.520419	3.73484	0.000187833	0.00228944
ENSG00000060237	WNK1	protein_coding	6248.68	0.365252	3.73442	0.000188151	0.00229137
ENSG00000165282	PIGO	protein_coding	373.743	-0.384551	-3.7337	0.00018869	0.00229596
ENSG00000168439	STIP1	protein_coding	1754.44	0.258551	3.73292	0.000189273	0.0023011
ENSG00000114126	TFDP2	protein_coding	464.487	-0.423034	-3.73218	0.000189826	0.00230587
ENSG00000123066	MED13L	protein_coding	4160.07	0.452436	3.72979	0.000191639	0.00232591
ENSG00000213402	PTPRCAP	protein_coding	6081.33	-0.493644	-3.72862	0.000192532	0.00233476
ENSG00000130600	H19	processed_transcript	18.7699	2.01259	3.72763	0.000193286	0.00234191
ENSG00000101307	SIRPB1	protein_coding	7323.25	0.605121	3.72586	0.000194652	0.00235646
ENSG00000167207	NOD2	protein_coding	1306.53	0.563084	3.72525	0.000195125	0.00236018
ENSG00000150961	SEC24D	protein_coding	895.545	0.362637	3.72441	0.000195776	0.00236605
ENSG00000112245	PTP4A1	protein_coding	1221	0.395982	3.7232	0.000196715	0.00237388
ENSG00000130779	CLIP1	protein_coding	1624.06	0.347473	3.72293	0.000196923	0.00237388
ENSG00000153179	RASSF3	protein_coding	7505.63	0.416483	3.7231	0.000196791	0.00237388
ENSG00000132155	RAF1	protein_coding	7575.99	0.545516	3.72242	0.000197319	0.00237665
ENSG00000093000	NUP50	protein_coding	3907.45	0.432339	3.72171	0.000197882	0.00237828
ENSG00000135842	FAM129A	protein_coding	11499.6	0.527818	3.72161	0.000197954	0.00237828
ENSG00000188906	LRRK2	protein_coding	10325.2	0.615081	3.7218	0.000197804	0.00237828
ENSG00000108861	DUSP3	protein_coding	776.723	0.387769	3.72048	0.000198847	0.002387
ENSG00000062194	GPBP1	protein_coding	2351.03	0.272472	3.71861	0.000200319	0.00240265
ENSG00000165119	HNRNPK	protein_coding	16751.7	0.306877	3.71805	0.000200765	0.00240598
ENSG00000065183	WDR3	protein_coding	397.082	-0.41328	-3.7176	0.000201121	0.00240823
ENSG00000127948	POR	protein_coding	1734.21	0.458545	3.71738	0.000201298	0.00240832
ENSG00000073111	MCM2	protein_coding	283.825	-0.455745	-3.71485	0.000203325	0.0024285
ENSG00000170325	PRDM10	protein_coding	310.402	0.445868	3.71497	0.000203226	0.0024285
ENSG00000115085	ZAP70	protein_coding	3584.58	-0.438267	-3.71401	0.000203998	0.00243451
ENSG00000168060	NAALADL1	protein_coding	170.235	-0.575896	-3.71309	0.000204746	0.00244138
ENSG00000068028	RASSF1	protein_coding	1732.91	-0.312866	-3.71112	0.000206343	0.00245838
ENSG00000166341	DCHS1	protein_coding	220.554	-0.509618	-3.71089	0.000206532	0.00245857
ENSG00000213625	LEPROT	protein_coding	1126.82	0.297572	3.71045	0.000206893	0.00246082
ENSG00000125744	RTN2	protein_coding	226.981	0.524208	3.70902	0.000208062	0.00247266
ENSG00000157911	PEX10	protein_coding	169.239	-0.627043	-3.70798	0.000208916	0.00248074
ENSG00000123610	TNFAIP6	protein_coding	677.229	0.584758	3.70753	0.000209291	0.00248111
ENSG00000169905	TOR1AIP2	protein_coding	688.261	0.377271	3.70753	0.000209294	0.00248111
ENSG00000104980	TIMM44	protein_coding	312.322	-0.392589	-3.7046	0.000211728	0.00250788
ENSG00000145332	KLHL8	protein_coding	671.251	0.437099	3.70401	0.00021222	0.00251162
ENSG00000095951	HIVEP1	protein_coding	530.924	0.418802	3.70188	0.000214011	0.00252863
ENSG00000174132	FAM174A	protein_coding	571.33	0.521756	3.70197	0.000213933	0.00252863
ENSG00000115756	HPCAL1	protein_coding	2461.05	0.395356	3.701	0.000214753	0.00253529
ENSG00000015133	CCDC88C	protein_coding	2621.52	-0.279715	-3.70017	0.000215457	0.0025398
ENSG00000160584	SIK3	protein_coding	2187.23	0.416849	3.70013	0.000215491	0.0025398
ENSG00000174718	KIAA1551	protein_coding	10381.7	0.483153	3.69896	0.000216483	0.00254939
ENSG00000125304	TM9SF2	protein_coding	4637.74	0.418346	3.69852	0.000216858	0.0025517
ENSG00000205269	TMEM170B	protein_coding	640.099	0.45316	3.69749	0.000217741	0.00255998
ENSG00000034713	GABARAPL2	protein_coding	2586.25	0.368629	3.69411	0.000220655	0.00258817
ENSG00000164808	SPIDR	protein_coding	541.024	0.383433	3.69419	0.000220587	0.00258817
ENSG00000170776	AKAP13	protein_coding	8105.93	0.376146	3.69408	0.000220683	0.00258817
ENSG00000057252	SOAT1	protein_coding	1042.19	0.419018	3.69285	0.000221754	0.00259673
ENSG00000112406	HECA	protein_coding	2825.36	0.357924	3.69283	0.000221777	0.00259673
ENSG00000178605	GTPBP6	protein_coding	844.788	-0.403659	-3.69207	0.000222441	0.00260237
ENSG00000131634	TMEM204	protein_coding	708.56	-0.446143	-3.69185	0.000222629	0.00260245
ENSG00000123159	GIPC1	protein_coding	448.289	-0.417254	-3.69152	0.000222922	0.00260373
ENSG00000257335	MGAM	protein_coding	8894.77	1.01088	3.691	0.000223376	0.00260691
ENSG00000164190	NIPBL	protein_coding	2214.12	0.372713	3.69023	0.000224056	0.0026127
ENSG00000117262	GPR89A	protein_coding	124.778	-0.6975	-3.69	0.000224256	0.0026129
ENSG00000006712	PAF1	protein_coding	1330.62	0.305063	3.68911	0.000225043	0.00261994
ENSG00000160593	JAML	protein_coding	24831.1	0.606182	3.6884	0.000225669	0.00262294
ENSG00000173575	CHD2	protein_coding	3710.66	0.310299	3.68856	0.000225525	0.00262294
ENSG00000196549	MME	protein_coding	9253.51	1.02209	3.68764	0.000226348	0.00262869
ENSG00000271762	RP11-213H15.4	lincRNA	38.5695	1.15699	3.68532	0.000228414	0.00265054
ENSG00000070614	NDST1	protein_coding	3100.09	0.695474	3.68413	0.000229487	0.0026565
ENSG00000095380	NANS	protein_coding	511.705	0.329945	3.68424	0.000229382	0.0026565
ENSG00000187778	MCRS1	protein_coding	1170.12	-0.294509	-3.68444	0.000229208	0.0026565
ENSG00000166946	CCNDBP1	protein_coding	3739.61	0.383424	3.6815	0.000231865	0.00268186
ENSG00000105520	PLPPR2	protein_coding	4342.41	0.661519	3.68121	0.000232132	0.00268276
ENSG00000143119	CD53	protein_coding	18893.6	0.339988	3.67856	0.00023455	0.00270853
ENSG00000128594	LRRC4	protein_coding	1929.91	0.733289	3.678	0.000235074	0.00271019
ENSG00000138814	PPP3CA	protein_coding	1393.92	0.384461	3.67809	0.000234988	0.00271019
ENSG00000163932	PRKCD	protein_coding	7369.95	0.584695	3.67735	0.000235671	0.00271488
ENSG00000178789	CD300LB	protein_coding	1897.79	0.466863	3.67708	0.00023592	0.00271555
ENSG00000033327	GAB2	protein_coding	4818.67	0.618176	3.67685	0.000236129	0.00271577
ENSG00000116406	EDEM3	protein_coding	941.812	0.416488	3.67548	0.000237403	0.00272748
ENSG00000129347	KRI1	protein_coding	887.222	-0.353127	-3.67534	0.000237529	0.00272748
ENSG00000117228	GBP1	protein_coding	2204.62	0.342468	3.67434	0.000238464	0.00273601
ENSG00000239998	LILRA2	protein_coding	9861.1	0.545611	3.67334	0.000239403	0.00274458
ENSG00000012660	ELOVL5	protein_coding	5078.54	0.394438	3.67271	0.00023999	0.0027491
ENSG00000213753	CENPBD1P1	transcribed_processed_pseudogene	926.567	0.330598	3.6722	0.000240475	0.00275245
ENSG00000163565	IFI16	protein_coding	5323.86	0.287236	3.67065	0.000241937	0.00276696
ENSG00000111640	GAPDH	protein_coding	28262.6	0.259948	3.67013	0.000242429	0.00277037
ENSG00000116096	SPR	protein_coding	26.7004	1.1468	3.66972	0.000242817	0.00277258
ENSG00000196782	MAML3	protein_coding	745.184	0.450892	3.66879	0.0002437	0.00278044
ENSG00000228382	ITPKB-IT1	sense_intronic	67.0851	0.79702	3.66832	0.000244154	0.00278339
ENSG00000163788	SNRK	protein_coding	3972.08	0.412983	3.66643	0.000245963	0.00280178
ENSG00000168395	ING5	protein_coding	670.535	-0.335676	-3.66607	0.000246311	0.0028035
ENSG00000118263	KLF7	protein_coding	1617.4	0.547703	3.66424	0.000248075	0.00282133
ENSG00000131263	RLIM	protein_coding	936.344	0.332648	3.66364	0.000248657	0.0028257
ENSG00000268027	AC006129.2	lincRNA	159.33	-0.69579	-3.66256	0.000249712	0.00283543
ENSG00000173110	HSPA6	protein_coding	5262.17	0.659857	3.66233	0.000249931	0.00283566
ENSG00000263753	LINC00667	lincRNA	428.101	-0.371499	-3.66085	0.00025138	0.00284983
ENSG00000138449	SLC40A1	protein_coding	2462.43	0.506702	3.66051	0.000251719	0.00285141
ENSG00000065615	CYB5R4	protein_coding	1924.63	0.425831	3.66011	0.000252105	0.00285353
ENSG00000260238	PMF1-BGLAP	protein_coding	64.4292	0.903628	3.65844	0.000253751	0.00286988
ENSG00000110172	CHORDC1	protein_coding	358.767	0.390926	3.6566	0.000255583	0.00288603
ENSG00000213516	RBMXL1	protein_coding	448.186	0.357429	3.65675	0.00025543	0.00288603
ENSG00000111540	RAB5B	protein_coding	5102.9	0.364254	3.65595	0.000256228	0.00289102
ENSG00000131480	AOC2	protein_coding	334.04	0.77487	3.65555	0.000256631	0.00289328
ENSG00000073008	PVR	protein_coding	261.836	0.522618	3.65532	0.000256864	0.00289362
ENSG00000088053	GP6	protein_coding	109.647	0.639927	3.65488	0.000257299	0.00289624
ENSG00000106546	AHR	protein_coding	649.288	0.519853	3.65206	0.000260144	0.00292596
ENSG00000119986	AVPI1	protein_coding	45.9555	0.862365	3.65135	0.000260867	0.00293178
ENSG00000149016	TUT1	protein_coding	448.81	-0.333961	-3.64988	0.000262362	0.00294626
ENSG00000011422	PLAUR	protein_coding	3350.62	0.613603	3.64845	0.000263829	0.0029604
ENSG00000198792	TMEM184B	protein_coding	1951.9	0.461088	3.64801	0.000264282	0.00296316
ENSG00000058866	DGKG	protein_coding	258.046	0.576966	3.64769	0.000264611	0.00296451
ENSG00000135677	GNS	protein_coding	5322.31	0.369192	3.64688	0.000265442	0.0029715
ENSG00000140691	ARMC5	protein_coding	235.59	-0.421499	-3.64619	0.000266162	0.00297722
ENSG00000135334	AKIRIN2	protein_coding	2101.86	0.435728	3.6449	0.000267499	0.00298983
ENSG00000140199	SLC12A6	protein_coding	4700.52	0.478044	3.64428	0.000268139	0.00299464
ENSG00000100207	TCF20	protein_coding	1942.46	0.378823	3.64182	0.000270713	0.00301867
ENSG00000183023	SLC8A1	protein_coding	703.068	0.477326	3.64201	0.000270518	0.00301867
ENSG00000135828	RNASEL	protein_coding	1532.42	0.420733	3.64142	0.000271144	0.00302039
ENSG00000231856	RP11-327P2.5	antisense	74.5797	0.75731	3.64128	0.000271291	0.00302039
ENSG00000162551	ALPL	protein_coding	8784.19	0.49185	3.63918	0.000273508	0.0030427
ENSG00000137076	TLN1	protein_coding	27256.6	0.421472	3.63782	0.000274959	0.00305645
ENSG00000119321	FKBP15	protein_coding	2126.49	0.33436	3.63692	0.000275922	0.00306477
ENSG00000171681	ATF7IP	protein_coding	2170.21	0.317234	3.63478	0.00027822	0.00308789
ENSG00000049245	VAMP3	protein_coding	1683.7	0.346989	3.63237	0.000280833	0.00311448
ENSG00000131389	SLC6A6	protein_coding	10943.6	0.576709	3.63041	0.000282968	0.00313086
ENSG00000131504	DIAPH1	protein_coding	9356.52	0.234631	3.63059	0.000282769	0.00313086
ENSG00000259171	RP11-903H12.5	protein_coding	24.386	2.03338	3.63059	0.000282774	0.00313086
ENSG00000096006	CRISP3	protein_coding	85.2454	1.10239	3.62964	0.000283816	0.0031378
ENSG00000260916	CCPG1	protein_coding	4245.03	0.525591	3.62845	0.000285123	0.00314981
ENSG00000108349	CASC3	protein_coding	5935.64	0.448407	3.62796	0.000285668	0.00315339
ENSG00000105953	OGDH	protein_coding	3068.74	0.272754	3.62759	0.000286081	0.00315552
ENSG00000089220	PEBP1	protein_coding	1623.3	-0.371701	-3.62711	0.000286609	0.00315889
ENSG00000135404	CD63	protein_coding	3953.46	0.325932	3.62472	0.000289274	0.0031858
ENSG00000121067	SPOP	protein_coding	1488.56	0.272472	3.62406	0.000290013	0.00319148
ENSG00000127824	TUBA4A	protein_coding	6347.45	0.496319	3.62309	0.000291104	0.00320103
ENSG00000214706	IFRD2	protein_coding	414.101	-0.417657	-3.62012	0.000294464	0.00323548
ENSG00000135763	URB2	protein_coding	177.767	-0.513256	-3.61934	0.000295352	0.00324273
ENSG00000171045	TSNARE1	protein_coding	187.248	-0.541283	-3.61857	0.000296239	0.00324997
ENSG00000134313	KIDINS220	protein_coding	2162.64	0.348959	3.61808	0.000296797	0.0032536
ENSG00000188997	KCTD21	protein_coding	565.114	0.426701	3.6171	0.000297925	0.00326346
ENSG00000257923	CUX1	protein_coding	2140.17	0.327037	3.61546	0.000299818	0.00328167
ENSG00000161395	PGAP3	protein_coding	458.629	-0.37904	-3.61412	0.000301369	0.0032936
ENSG00000177119	ANO6	protein_coding	1145.58	0.302841	3.6143	0.000301165	0.0032936
ENSG00000130714	POMT1	protein_coding	302.591	-0.398716	-3.61334	0.000302273	0.00330095
ENSG00000007255	TRAPPC6A	protein_coding	466.25	-0.455841	-3.61281	0.000302894	0.00330251
ENSG00000150687	PRSS23	protein_coding	355.03	-0.693955	-3.61263	0.00030311	0.00330251
ENSG00000151458	ANKRD50	protein_coding	126.491	0.510792	3.6129	0.000302792	0.00330251
ENSG00000178498	DTX3	protein_coding	249.311	-0.527745	-3.61196	0.000303888	0.00330846
ENSG00000055332	EIF2AK2	protein_coding	976.466	0.431142	3.61158	0.000304335	0.00331081
ENSG00000140153	WDR20	protein_coding	580.963	0.286361	3.6097	0.000306553	0.00333239
ENSG00000170852	KBTBD2	protein_coding	1668.91	0.415856	3.60906	0.000307309	0.00333806
ENSG00000107815	TWNK	protein_coding	200.215	-0.550651	-3.60784	0.000308752	0.00334936
ENSG00000188315	C3orf62	protein_coding	944.853	0.470467	3.60779	0.000308818	0.00334936
ENSG00000058673	ZC3H11A	protein_coding	3871.56	0.305175	3.60758	0.000309071	0.00334956
ENSG00000092096	SLC22A17	protein_coding	52.3894	-0.872987	-3.60667	0.000310153	0.00335874
ENSG00000108100	CCNY	protein_coding	3521.2	0.271661	3.60597	0.000310987	0.00336522
ENSG00000100330	MTMR3	protein_coding	5462.13	0.506766	3.60399	0.000313363	0.00338836
ENSG00000085185	BCORL1	protein_coding	721.8	0.570876	3.60313	0.000314412	0.00339713
ENSG00000173597	SULT1B1	protein_coding	1711.43	0.511295	3.60195	0.000315844	0.0034051
ENSG00000180354	MTURN	protein_coding	1608.67	0.388383	3.60193	0.000315866	0.0034051
ENSG00000180953	ST20	protein_coding	260.608	0.797756	3.60215	0.000315592	0.0034051
ENSG00000155846	PPARGC1B	protein_coding	118.135	-0.601221	-3.60148	0.000316406	0.00340835
ENSG00000048828	FAM120A	protein_coding	4035.61	0.352867	3.60122	0.000316724	0.0034092
ENSG00000118308	LRMP	protein_coding	4219.52	0.428093	3.60078	0.000317264	0.00341244
ENSG00000133884	DPF2	protein_coding	2206.82	0.336119	3.60025	0.000317917	0.00341689
ENSG00000113719	ERGIC1	protein_coding	8747.48	0.495728	3.59983	0.000318427	0.0034198
ENSG00000153815	CMIP	protein_coding	3766.75	0.476691	3.59928	0.000319104	0.00342449
ENSG00000124942	AHNAK	protein_coding	20162	0.353074	3.59841	0.000320166	0.00343331
ENSG00000114767	RRP9	protein_coding	199.232	-0.603516	-3.59672	0.000322257	0.00345181
ENSG00000197771	MCMBP	protein_coding	1862.68	0.301364	3.59662	0.000322375	0.00345181
ENSG00000109118	PHF12	protein_coding	3399.35	0.475582	3.59457	0.000324925	0.00346611
ENSG00000109270	LAMTOR3	protein_coding	933.962	0.343185	3.59498	0.000324421	0.00346611
ENSG00000116299	KIAA1324	protein_coding	2321.42	0.612916	3.59468	0.000324792	0.00346611
ENSG00000133800	LYVE1	protein_coding	18.2552	1.34597	3.5948	0.000324641	0.00346611
ENSG00000167106	FAM102A	protein_coding	3407.61	-0.34358	-3.59464	0.000324844	0.00346611
ENSG00000107745	MICU1	protein_coding	1271.55	0.317737	3.59395	0.0003257	0.00347178
ENSG00000073536	NLE1	protein_coding	248.007	-0.546687	-3.593	0.000326893	0.00348048
ENSG00000181631	P2RY13	protein_coding	5993.17	0.426521	3.59291	0.000327004	0.00348048
ENSG00000120709	FAM53C	protein_coding	4970.47	0.59933	3.59175	0.00032847	0.00349348
ENSG00000095906	NUBP2	protein_coding	850.609	-0.360546	-3.59091	0.000329524	0.00349819
ENSG00000099889	ARVCF	protein_coding	73.852	-0.78877	-3.59117	0.000329201	0.00349819
ENSG00000181016	LSMEM1	protein_coding	79.7205	0.882763	3.59081	0.000329648	0.00349819
ENSG00000143549	TPM3	protein_coding	14967.3	0.252321	3.59011	0.00033054	0.00350505
ENSG00000100485	SOS2	protein_coding	1631.91	0.439177	3.5891	0.000331816	0.00351597
ENSG00000156587	UBE2L6	protein_coding	3651.86	0.300325	3.58864	0.000332403	0.00351957
ENSG00000203814	HIST2H2BF	protein_coding	89.864	0.96497	3.58595	0.000335856	0.0035535
ENSG00000198832	SELENOM	protein_coding	168.285	-0.567383	-3.58402	0.000338345	0.00357718
ENSG00000085063	CD59	protein_coding	1011.85	0.356812	3.58209	0.000340861	0.00360112
ENSG00000107554	DNMBP	protein_coding	314.524	0.379558	3.58167	0.000341408	0.00360422
ENSG00000054965	FAM168A	protein_coding	1032.9	0.321846	3.58069	0.000342689	0.00361508
ENSG00000162511	LAPTM5	protein_coding	52268.5	0.35843	3.5803	0.000343201	0.00361755
ENSG00000177971	IMP3	protein_coding	922.683	-0.363971	-3.58012	0.00034343	0.00361755
ENSG00000154358	OBSCN	protein_coding	628.846	-0.353632	-3.57977	0.000343897	0.0036198
ENSG00000156521	TYSND1	protein_coding	454.801	-0.403299	-3.57889	0.000345058	0.00362934
ENSG00000116209	TMEM59	protein_coding	3869.55	0.317429	3.57843	0.000345662	0.00363301
ENSG00000169413	RNASE6	protein_coding	1580.84	0.462276	3.57764	0.000346714	0.00364139
ENSG00000108846	ABCC3	protein_coding	539.969	0.404859	3.57734	0.000347113	0.00364156
ENSG00000129625	REEP5	protein_coding	2343.27	0.274275	3.57724	0.00034724	0.00364156
ENSG00000253276	CCDC71L	protein_coding	597.469	0.380614	3.57699	0.000347575	0.0036424
ENSG00000013016	EHD3	protein_coding	518.374	0.338719	3.5751	0.00035009	0.00366606
ENSG00000128266	GNAZ	protein_coding	343.981	0.460941	3.5728	0.000353184	0.00369431
ENSG00000185033	SEMA4B	protein_coding	3744.35	0.511469	3.57271	0.000353306	0.00369431
ENSG00000010539	ZNF200	protein_coding	736.509	0.473777	3.57158	0.000354829	0.00370752
ENSG00000011600	TYROBP	protein_coding	18933.8	0.394286	3.57017	0.000356747	0.00372345
ENSG00000158089	GALNT14	protein_coding	101.791	0.850672	3.57008	0.000356875	0.00372345
ENSG00000135912	TTLL4	protein_coding	858.066	0.479774	3.56757	0.000360314	0.00375658
ENSG00000175455	CCDC14	protein_coding	173.298	-0.451704	-3.56701	0.00036108	0.00376182
ENSG00000166311	SMPD1	protein_coding	850.195	-0.276411	-3.5664	0.000361925	0.00376788
ENSG00000260007	RP11-315D16.2	protein_coding	123.458	0.871696	3.56614	0.000362272	0.00376873
ENSG00000108666	C17orf75	protein_coding	117.534	-0.55321	-3.56551	0.000363145	0.00377506
ENSG00000130724	CHMP2A	protein_coding	3999.64	0.418645	3.56471	0.000364259	0.00378389
ENSG00000136999	NOV	protein_coding	826.821	0.685082	3.56327	0.000366258	0.00380189
ENSG00000249115	HAUS5	protein_coding	250.079	-0.453663	-3.56179	0.000368334	0.00382067
ENSG00000166199	ALKBH3	protein_coding	198.742	-0.527838	-3.56135	0.000368956	0.00382434
ENSG00000160746	ANO10	protein_coding	420.12	0.445743	3.56005	0.000370789	0.00384055
ENSG00000276422	RP11-144A16.8	lincRNA	25.4884	1.0729	3.55969	0.000371289	0.00384293
ENSG00000177383	MAGEF1	protein_coding	224.966	-0.419433	-3.55845	0.000373052	0.00385838
ENSG00000136048	DRAM1	protein_coding	498.13	0.381701	3.55681	0.000375388	0.00387736
ENSG00000160959	LRRC14	protein_coding	530.2	-0.362918	-3.55678	0.00037543	0.00387736
ENSG00000170871	KIAA0232	protein_coding	2233.79	0.449291	3.55587	0.000376734	0.00388802
ENSG00000196872	KIAA1211L	protein_coding	141.553	0.61494	3.55391	0.000379551	0.00391425
ENSG00000154305	MIA3	protein_coding	1398.86	0.279711	3.55318	0.000380608	0.00392232
ENSG00000169627	BOLA2B	protein_coding	237.493	-0.455946	-3.55277	0.000381202	0.00392561
ENSG00000110911	SLC11A2	protein_coding	286.591	-0.382117	-3.55219	0.000382046	0.00392662
ENSG00000112343	TRIM38	protein_coding	1987.1	0.350415	3.55213	0.000382125	0.00392662
ENSG00000185862	EVI2B	protein_coding	17445.4	0.462056	3.5525	0.000381596	0.00392662
ENSG00000124214	STAU1	protein_coding	1816.77	0.315236	3.55161	0.000382887	0.00393162
ENSG00000100354	TNRC6B	protein_coding	1504.22	0.418366	3.55013	0.000385044	0.00395092
ENSG00000118113	MMP8	protein_coding	108.263	1.17147	3.5494	0.000386111	0.00395902
ENSG00000137331	IER3	protein_coding	805.909	0.582615	3.54825	0.0003878	0.00397349
ENSG00000249437	NAIP	protein_coding	1602.93	0.470974	3.54731	0.000389187	0.00398484
ENSG00000126368	NR1D1	protein_coding	260.926	-0.539782	-3.54606	0.000391031	0.00400085
ENSG00000101457	DNTTIP1	protein_coding	1437.95	0.404274	3.54511	0.000392453	0.00401253
ENSG00000100554	ATP6V1D	protein_coding	767.453	0.331539	3.54408	0.00039399	0.00402536
ENSG00000173210	ABLIM3	protein_coding	393.776	0.450143	3.54266	0.000396108	0.00404409
ENSG00000244486	SCARF2	protein_coding	62.8324	-0.786927	-3.54238	0.000396531	0.00404552
ENSG00000008130	NADK	protein_coding	16556.6	0.545225	3.54186	0.000397312	0.0040506
ENSG00000174238	PITPNA	protein_coding	3188.06	0.355614	3.54156	0.000397761	0.00405228
ENSG00000173868	PHOSPHO1	protein_coding	12458.3	0.539679	3.54078	0.000398945	0.00406144
ENSG00000106066	CPVL	protein_coding	2978.54	0.447562	3.53848	0.000402444	0.00409414
ENSG00000280071	CH507-9B2.3	protein_coding	937.14	-0.346477	-3.53733	0.000404201	0.00410909
ENSG00000173366	RP11-330H6.5	protein_coding	196.473	-0.827643	-3.53631	0.00040576	0.004122
ENSG00000235505	RP11-693N9.2	transcribed_unprocessed_pseudogene	68.7408	-0.761167	-3.53612	0.00040605	0.00412202
ENSG00000143374	TARS2	protein_coding	386.053	-0.376583	-3.53522	0.00040743	0.00413309
ENSG00000032444	PNPLA6	protein_coding	2570.28	0.275658	3.53479	0.000408094	0.00413688
ENSG00000134369	NAV1	protein_coding	102.407	-0.700566	-3.53445	0.000408629	0.00413936
ENSG00000100226	GTPBP1	protein_coding	2203.17	0.401742	3.53334	0.000410349	0.00415384
ENSG00000062650	WAPL	protein_coding	1702.67	0.27399	3.53276	0.000411239	0.00415401
ENSG00000120899	PTK2B	protein_coding	7977.98	0.393051	3.533	0.000410871	0.00415401
ENSG00000151702	FLI1	protein_coding	5954.11	0.313824	3.53292	0.000410992	0.00415401
ENSG00000221866	PLXNA4	protein_coding	72.2338	-0.651012	-3.53108	0.000413859	0.00417752
ENSG00000157978	LDLRAP1	protein_coding	2732.93	-0.277981	-3.52877	0.0004175	0.00420832
ENSG00000170340	B3GNT2	protein_coding	621.01	0.31448	3.52879	0.000417466	0.00420832
ENSG00000073861	TBX21	protein_coding	1314.24	-0.556106	-3.52812	0.000418517	0.00421559
ENSG00000058453	CROCC	protein_coding	504.567	-0.386885	-3.52767	0.00041924	0.0042199
ENSG00000166928	MS4A14	protein_coding	101.812	0.795611	3.5256	0.000422531	0.00425002
ENSG00000136161	RCBTB2	protein_coding	1117.69	0.497473	3.52504	0.000423411	0.00425588
ENSG00000039319	ZFYVE16	protein_coding	696.634	0.445439	3.52443	0.000424395	0.00426177
ENSG00000128335	APOL2	protein_coding	2349.77	0.44386	3.52431	0.000424594	0.00426177
ENSG00000073464	CLCN4	protein_coding	278.265	0.723827	3.52403	0.000425043	0.00426328
ENSG00000230989	HSBP1	protein_coding	1188.65	0.313237	3.52025	0.00043114	0.00432139
ENSG00000043462	LCP2	protein_coding	7428.76	0.371424	3.51887	0.000433389	0.00433589
ENSG00000130299	GTPBP3	protein_coding	222.752	-0.413379	-3.51892	0.000433305	0.00433589
ENSG00000266074	BAHCC1	protein_coding	93.9312	-0.567933	-3.5188	0.000433498	0.00433589
ENSG00000140044	JDP2	protein_coding	1431.81	0.522508	3.51851	0.000433984	0.00433771
ENSG00000274070	GATSL2	protein_coding	70.4724	0.897345	3.51709	0.000436307	0.00435787
ENSG00000140259	MFAP1	protein_coding	797.489	0.313924	3.51656	0.000437181	0.00436356
ENSG00000167664	TMIGD2	protein_coding	321.248	-0.491403	-3.51612	0.000437905	0.00436772
ENSG00000084733	RAB10	protein_coding	2539.94	0.26304	3.51526	0.000439325	0.00437577
ENSG00000099246	RAB18	protein_coding	1387.12	0.383417	3.51541	0.00043908	0.00437577
ENSG00000095303	PTGS1	protein_coding	2273.8	0.367798	3.51491	0.000439897	0.00437763
ENSG00000110852	CLEC2B	protein_coding	816.572	0.46684	3.51459	0.000440432	0.00437763
ENSG00000147065	MSN	protein_coding	47449.4	0.326651	3.51477	0.000440137	0.00437763
ENSG00000280206	CTB-193M12.5	lincRNA	105.948	0.587403	3.51365	0.000442002	0.00439019
ENSG00000132394	EEFSEC	protein_coding	410.436	-0.356875	-3.51253	0.000443854	0.00440245
ENSG00000150593	PDCD4	protein_coding	2905.63	0.259694	3.51266	0.000443645	0.00440245
ENSG00000006007	GDE1	protein_coding	2138.29	0.364581	3.51232	0.000444217	0.00440299
ENSG00000109466	KLHL2	protein_coding	1231.5	0.502043	3.51086	0.000446659	0.00442412
ENSG00000176022	B3GALT6	protein_coding	448.958	-0.52225	-3.5106	0.000447102	0.00442544
ENSG00000197111	PCBP2	protein_coding	13754.7	0.272892	3.50958	0.000448807	0.00443924
ENSG00000136997	MYC	protein_coding	1655.37	-0.362358	-3.50919	0.000449477	0.00444279
ENSG00000197324	LRP10	protein_coding	21034.3	0.538356	3.50892	0.000449934	0.00444423
ENSG00000159267	HLCS	protein_coding	169.201	-0.508684	-3.50846	0.000450712	0.00444883
ENSG00000145287	PLAC8	protein_coding	1541.24	-0.393438	-3.50697	0.000453248	0.00447077
ENSG00000141076	UTP4	protein_coding	262.633	-0.43511	-3.50664	0.000453811	0.00447324
ENSG00000170604	IRF2BP1	protein_coding	669.039	-0.305424	-3.50506	0.000456513	0.00449676
ENSG00000139436	GIT2	protein_coding	3469.17	0.394578	3.50422	0.000457939	0.0045077
ENSG00000205352	PRR13	protein_coding	8180.97	0.366214	3.50307	0.000459929	0.00452417
ENSG00000284552	RP11-321E2.5	protein_coding	43.7025	1.03803	3.50106	0.000463413	0.0045553
ENSG00000242247	ARFGAP3	protein_coding	968.411	0.282672	3.50043	0.000464517	0.00456301
ENSG00000119285	HEATR1	protein_coding	480.995	-0.347733	-3.49884	0.000467282	0.00458702
ENSG00000104524	PYCRL	protein_coding	99.9847	-0.585984	-3.496	0.000472287	0.00462524
ENSG00000141295	SCRN2	protein_coding	372.391	-0.359332	-3.49571	0.000472796	0.00462524
ENSG00000148841	ITPRIP	protein_coding	4494.91	0.517652	3.49573	0.000472774	0.00462524
ENSG00000164430	MB21D1	protein_coding	263.174	0.424404	3.49607	0.000472169	0.00462524
ENSG00000198931	APRT	protein_coding	2008.17	-0.298042	-3.49641	0.000471566	0.00462524
ENSG00000127580	WDR24	protein_coding	261.736	-0.392021	-3.49538	0.000473386	0.00462783
ENSG00000113070	HBEGF	protein_coding	35.8347	1.12797	3.49472	0.000474565	0.00463618
ENSG00000153044	CENPH	protein_coding	60.0863	-0.809007	-3.49427	0.000475361	0.00464078
ENSG00000179041	RRS1	protein_coding	341.389	-0.394828	-3.49265	0.000478254	0.00466583
ENSG00000164054	SHISA5	protein_coding	11471.7	0.347776	3.49223	0.000479009	0.00467001
ENSG00000137161	CNPY3	protein_coding	8026.57	0.420846	3.49196	0.000479493	0.00467153
ENSG00000108839	ALOX12	protein_coding	263.901	0.477554	3.49151	0.000480293	0.00467614
ENSG00000116698	SMG7	protein_coding	2487.3	0.330653	3.49023	0.000482598	0.00469538
ENSG00000075292	ZNF638	protein_coding	1553.97	0.299137	3.48923	0.000484413	0.00470982
ENSG00000130766	SESN2	protein_coding	607.283	0.421116	3.48878	0.000485233	0.00471459
ENSG00000100413	POLR3H	protein_coding	482.866	-0.41532	-3.48843	0.000485865	0.00471752
ENSG00000135838	NPL	protein_coding	2519.88	0.542561	3.48815	0.00048637	0.00471921
ENSG00000177106	EPS8L2	protein_coding	121.096	-0.527571	-3.48729	0.000487945	0.00473127
ENSG00000132970	WASF3	protein_coding	39.5928	0.866005	3.48345	0.000494991	0.00479308
ENSG00000143862	ARL8A	protein_coding	1559.59	0.400903	3.48348	0.000494934	0.00479308
ENSG00000135655	USP15	protein_coding	4556.76	0.43537	3.48262	0.000496524	0.00480467
ENSG00000160226	C21orf2	protein_coding	441.542	-0.385049	-3.48129	0.000498996	0.00482532
ENSG00000108771	DHX58	protein_coding	471.224	-0.343107	-3.47952	0.000502318	0.00485415
ENSG00000176393	RNPEP	protein_coding	2299.47	0.325742	3.47719	0.000506697	0.00489316
ENSG00000197943	PLCG2	protein_coding	4640.37	0.495858	3.47673	0.000507562	0.0048982
ENSG00000049860	HEXB	protein_coding	1781.76	0.285915	3.47588	0.000509174	0.00490712
ENSG00000105501	SIGLEC5	protein_coding	3140.44	0.670237	3.47602	0.000508914	0.00490712
ENSG00000025293	PHF20	protein_coding	1863.92	0.237598	3.47561	0.000509699	0.00490886
ENSG00000189409	MMP23B	protein_coding	67.0348	-0.788694	-3.47527	0.00051034	0.00491172
ENSG00000125746	EML2	protein_coding	540.744	-0.292694	-3.47381	0.000513131	0.00493526
ENSG00000176390	CRLF3	protein_coding	2965.07	0.315447	3.47288	0.000514909	0.00494902
ENSG00000147416	ATP6V1B2	protein_coding	16064.7	0.467324	3.47205	0.000516495	0.00496093
ENSG00000225101	OR52K3P	unprocessed_pseudogene	251.294	0.742428	3.47094	0.000518637	0.00497815
ENSG00000103254	FAM173A	protein_coding	275.015	-0.580373	-3.47028	0.000519911	0.00498702
ENSG00000198574	SH2D1B	protein_coding	558.264	-0.484363	-3.46741	0.00052549	0.00503715
ENSG00000114450	GNB4	protein_coding	893.391	0.374325	3.4671	0.000526103	0.00503895
ENSG00000117118	SDHB	protein_coding	1489.21	0.260139	3.46677	0.000526755	0.00503895
ENSG00000135218	CD36	protein_coding	1603.8	-0.428122	-3.4666	0.00052709	0.00503895
ENSG00000145391	SETD7	protein_coding	387.666	0.453025	3.46678	0.000526729	0.00503895
ENSG00000187838	PLSCR3	protein_coding	1671.3	-0.326802	-3.4664	0.000527486	0.00503937
ENSG00000147174	GCNA	protein_coding	61.304	0.651413	3.46552	0.000529209	0.00505244
ENSG00000055208	TAB2	protein_coding	3085.12	0.391113	3.46462	0.00053098	0.00505865
ENSG00000082512	TRAF5	protein_coding	579.323	-0.305187	-3.46489	0.000530444	0.00505865
ENSG00000156313	RPGR	protein_coding	318.038	0.480578	3.46447	0.000531276	0.00505865
ENSG00000169967	MAP3K2	protein_coding	2601.05	0.452825	3.46478	0.000530657	0.00505865
ENSG00000258818	RNASE4	protein_coding	79.9038	0.746399	3.46409	0.000532032	0.00506247
ENSG00000164023	SGMS2	protein_coding	208.017	0.68898	3.46386	0.000532477	0.00506332
ENSG00000134516	DOCK2	protein_coding	6980.93	0.317317	3.46335	0.000533496	0.00506963
ENSG00000090376	IRAK3	protein_coding	1592.62	0.446352	3.46178	0.000536613	0.00509586
ENSG00000204252	HLA-DOA	protein_coding	1136.69	-0.424412	-3.45935	0.000541482	0.00513867
ENSG00000058272	PPP1R12A	protein_coding	1859.11	0.364733	3.4572	0.000545815	0.00517568
ENSG00000205155	PSENEN	protein_coding	1135.66	0.300349	3.45706	0.000546106	0.00517568
ENSG00000204120	GIGYF2	protein_coding	1304.85	0.258442	3.45674	0.000546743	0.00517828
ENSG00000125375	ATP5S	protein_coding	173.087	-0.494603	-3.45644	0.000547359	0.00518068
ENSG00000073150	PANX2	protein_coding	1305.43	0.680459	3.45578	0.000548709	0.00519001
ENSG00000142046	TMEM91	protein_coding	1212.69	0.68642	3.45443	0.000551452	0.0052125
ENSG00000106263	EIF3B	protein_coding	2068.93	-0.296898	-3.45391	0.000552531	0.00521924
ENSG00000081692	JMJD4	protein_coding	241.02	-0.479661	-3.45222	0.000555997	0.00524851
ENSG00000102921	N4BP1	protein_coding	3918.83	0.430375	3.45155	0.000557383	0.00525811
ENSG00000142409	ZNF787	protein_coding	941.446	0.354177	3.45123	0.000558037	0.00526081
ENSG00000116991	SIPA1L2	protein_coding	802.136	0.590771	3.44908	0.000562493	0.00529932
ENSG00000053372	MRTO4	protein_coding	327.08	-0.461507	-3.44729	0.000566241	0.0053311
ENSG00000111670	GNPTAB	protein_coding	1121.27	-0.375099	-3.44642	0.00056807	0.00533661
ENSG00000134545	KLRC1	protein_coding	121.274	-0.748925	-3.4463	0.000568321	0.00533661
ENSG00000134686	PHC2	protein_coding	12086.9	0.521914	3.44655	0.00056779	0.00533661
ENSG00000147155	EBP	protein_coding	280.67	-0.455419	-3.44654	0.000567806	0.00533661
ENSG00000024048	UBR2	protein_coding	4340.04	0.44866	3.44558	0.00056984	0.00534735
ENSG00000150977	RILPL2	protein_coding	2762.74	0.317025	3.44445	0.000572216	0.00536612
ENSG00000173540	GMPPB	protein_coding	453.048	-0.338048	-3.44415	0.000572859	0.00536863
ENSG00000084731	KIF3C	protein_coding	375.121	0.605122	3.44356	0.000574113	0.00537685
ENSG00000171314	PGAM1	protein_coding	7251.46	0.232154	3.44295	0.000575406	0.00538543
ENSG00000185730	ZNF696	protein_coding	144.494	-0.610014	-3.44153	0.000578441	0.00541028
ENSG00000102981	PARD6A	protein_coding	122.216	0.524117	3.44099	0.00057959	0.00541625
ENSG00000132361	CLUH	protein_coding	663.939	-0.341212	-3.4408	0.00057999	0.00541625
ENSG00000182853	VMO1	protein_coding	32.2698	1.16466	3.44056	0.000580515	0.00541625
ENSG00000185947	ZNF267	protein_coding	1087.35	0.354837	3.44052	0.000580597	0.00541625
ENSG00000217555	CKLF	protein_coding	1733.79	0.431352	3.43987	0.000582	0.00542579
ENSG00000130433	CACNG6	protein_coding	52.4667	-0.680065	-3.4396	0.000582585	0.00542716
ENSG00000272196	HIST2H2AA4	protein_coding	1223.67	0.634003	3.43945	0.000582907	0.00542716
ENSG00000130023	ERMARD	protein_coding	146.926	-0.533244	-3.43873	0.000584458	0.00543805
ENSG00000106692	FKTN	protein_coding	88.9932	-0.612929	-3.43848	0.000584991	0.00543946
ENSG00000127507	ADGRE2	protein_coding	4321.88	0.37095	3.43744	0.000587239	0.00545681
ENSG00000076662	ICAM3	protein_coding	28244.8	0.500842	3.43652	0.000589249	0.00547193
ENSG00000141968	VAV1	protein_coding	4912.44	0.402531	3.43629	0.000589746	0.00547298
ENSG00000136950	ARPC5L	protein_coding	724.602	-0.427658	-3.43344	0.000595968	0.00552713
ENSG00000211455	STK38L	protein_coding	1088.49	0.367379	3.43138	0.000600525	0.00556577
ENSG00000239636	RP4-728D4.2	antisense	54.6637	-0.800623	-3.42978	0.000604063	0.00559493
ENSG00000196810	CTBP1-AS2	antisense	278.313	-0.434523	-3.42808	0.000607857	0.00562642
ENSG00000186517	ARHGAP30	protein_coding	18094	0.335017	3.42772	0.00060867	0.00563029
ENSG00000067992	PDK3	protein_coding	523.602	0.494029	3.42719	0.000609872	0.00563776
ENSG00000085733	CTTN	protein_coding	527.963	0.479564	3.42613	0.000612238	0.00565597
ENSG00000136040	PLXNC1	protein_coding	9898.69	0.474929	3.42555	0.000613556	0.00566448
ENSG00000143761	ARF1	protein_coding	12874.7	0.272565	3.42508	0.000614613	0.00567057
ENSG00000182732	RGS6	protein_coding	101.844	0.652788	3.42408	0.000616875	0.00568042
ENSG00000189068	VSTM1	protein_coding	368.938	0.351372	3.42417	0.000616686	0.00568042
ENSG00000275023	MLLT6	protein_coding	6683.12	-0.269358	-3.42422	0.000616561	0.00568042
ENSG00000227398	KIF9-AS1	antisense	30.4043	0.947584	3.42266	0.000620117	0.0057066
ENSG00000099821	POLRMT	protein_coding	920.6	-0.312574	-3.42164	0.000622449	0.00572437
ENSG00000076108	BAZ2A	protein_coding	5891.82	0.39457	3.4203	0.000625517	0.00574658
ENSG00000132824	SERINC3	protein_coding	3975.86	0.347034	3.42024	0.00062567	0.00574658
ENSG00000205133	TRIQK	protein_coding	244.917	0.44575	3.4197	0.000626894	0.00575412
ENSG00000213347	MXD3	protein_coding	877.558	0.61398	3.41817	0.000630443	0.00577926
ENSG00000235173	HGH1	protein_coding	396.579	-0.454361	-3.4183	0.00063014	0.00577926
ENSG00000185024	BRF1	protein_coding	588.094	-0.340331	-3.41724	0.000632606	0.00579537
ENSG00000196182	STK40	protein_coding	10197.5	0.482318	3.41541	0.000636872	0.0058307
ENSG00000116473	RAP1A	protein_coding	3536.29	0.273153	3.41435	0.000639352	0.00584267
ENSG00000140350	ANP32A	protein_coding	5711.76	0.375579	3.41432	0.000639407	0.00584267
ENSG00000142867	BCL10	protein_coding	689.659	0.326517	3.41444	0.000639133	0.00584267
ENSG00000171302	CANT1	protein_coding	3545.96	0.412265	3.41269	0.000643253	0.00587405
ENSG00000137752	CASP1	protein_coding	3999.88	0.33377	3.4103	0.000648913	0.00592195
ENSG00000281162	LINC01127	lincRNA	464.68	0.800265	3.4075	0.000655604	0.00597919
ENSG00000162714	ZNF496	protein_coding	317.558	-0.357498	-3.40709	0.000656603	0.00598448
ENSG00000138434	SSFA2	protein_coding	1838.68	0.359033	3.40616	0.000658834	0.00599715
ENSG00000256576	RP13-977J11.2	lincRNA	122.086	-0.516669	-3.40626	0.000658599	0.00599715
ENSG00000151726	ACSL1	protein_coding	15713	0.900534	3.40532	0.00066086	0.00601176
ENSG00000172005	MAL	protein_coding	724.873	-0.476732	-3.40407	0.00066389	0.00603548
ENSG00000181778	TMEM252	protein_coding	46.3059	1.13429	3.40288	0.000666799	0.00605807
ENSG00000133812	SBF2	protein_coding	1009.94	0.411174	3.40231	0.000668183	0.00606677
ENSG00000006015	C19orf60	protein_coding	965.107	-0.282315	-3.40185	0.00066932	0.00606938
ENSG00000172845	SP3	protein_coding	2966.14	0.346329	3.40197	0.000669012	0.00606938
ENSG00000168903	BTNL3	protein_coding	286.359	0.750737	3.40151	0.00067015	0.00607305
ENSG00000243646	IL10RB	protein_coding	3001.79	0.370912	3.40097	0.000671478	0.00608122
ENSG00000129932	DOHH	protein_coding	180.456	-0.515534	-3.4002	0.000673371	0.00609064
ENSG00000151693	ASAP2	protein_coding	81.7453	0.638378	3.40036	0.000672978	0.00609064
ENSG00000205544	TMEM256	protein_coding	231.018	-0.448895	-3.39823	0.000678244	0.00613083
ENSG00000185880	TRIM69	protein_coding	1268.18	0.286183	3.39395	0.000688914	0.00622333
ENSG00000152213	ARL11	protein_coding	958.473	0.416731	3.39369	0.000689585	0.00622545
ENSG00000140905	GCSH	protein_coding	31.1344	-0.941348	-3.39211	0.000693568	0.00625745
ENSG00000067208	EVI5	protein_coding	243.037	0.39181	3.39063	0.000697328	0.00628741
ENSG00000047648	ARHGAP6	protein_coding	99.1522	0.580352	3.39026	0.000698252	0.00629176
ENSG00000119471	HSDL2	protein_coding	1507.03	0.423254	3.38989	0.000699202	0.00629635
ENSG00000085788	DDHD2	protein_coding	483.923	-0.348887	-3.38921	0.000700932	0.00630795
ENSG00000228300	C19orf24	protein_coding	538.419	-0.34223	-3.38824	0.000703421	0.00632636
ENSG00000005206	SPPL2B	protein_coding	797.68	-0.429121	-3.38691	0.000706841	0.00634512
ENSG00000078618	NRDC	protein_coding	3846.47	0.438712	3.38715	0.000706232	0.00634512
ENSG00000108468	CBX1	protein_coding	1357.45	0.317208	3.387	0.000706618	0.00634512
ENSG00000134371	CDC73	protein_coding	618.693	0.279116	3.38629	0.000708434	0.00635143
ENSG00000146215	CRIP3	protein_coding	28.5392	-0.965346	-3.38638	0.00070822	0.00635143
ENSG00000008083	JARID2	protein_coding	2619.91	0.435456	3.38582	0.000709649	0.00635833
ENSG00000022277	RTFDC1	protein_coding	4840.47	0.419338	3.38522	0.000711208	0.00636431
ENSG00000196209	SIRPB2	protein_coding	3449.99	0.586728	3.38532	0.000710961	0.00636431
ENSG00000085265	FCN1	protein_coding	31005.3	0.368385	3.38301	0.000716973	0.00640786
ENSG00000221869	CEBPD	protein_coding	7679.7	0.453563	3.38317	0.000716535	0.00640786
ENSG00000145685	LHFPL2	protein_coding	324.826	0.34907	3.38271	0.00071775	0.00641079
ENSG00000130939	UBE4B	protein_coding	1532.44	0.367308	3.38067	0.000723103	0.00645456
ENSG00000143437	ARNT	protein_coding	1290.36	0.277698	3.37931	0.000726687	0.0064825
ENSG00000179715	PCED1B	protein_coding	1118.04	-0.326735	-3.37839	0.00072912	0.00650014
ENSG00000167925	GHDC	protein_coding	613.613	-0.286618	-3.3779	0.000730414	0.00650762
ENSG00000137177	KIF13A	protein_coding	1844.08	0.552638	3.37667	0.000733702	0.00653097
ENSG00000142303	ADAMTS10	protein_coding	242.779	-0.588024	-3.37657	0.000733951	0.00653097
ENSG00000145780	FEM1C	protein_coding	416.675	0.372763	3.37613	0.000735125	0.00653734
ENSG00000087116	ADAMTS2	protein_coding	24.3308	1.60072	3.37506	0.000737991	0.00655538
ENSG00000198673	FAM19A2	protein_coding	82.2006	0.700153	3.37503	0.000738072	0.00655538
ENSG00000132199	ENOSF1	protein_coding	132.357	-0.612663	-3.3733	0.000742722	0.00659258
ENSG00000250571	GLI4	protein_coding	276.234	-0.488925	-3.37273	0.000744272	0.00660224
ENSG00000036448	MYOM2	protein_coding	508.758	-0.529155	-3.37187	0.000746594	0.00661872
ENSG00000151532	VTI1A	protein_coding	570.959	0.364197	3.37088	0.000749292	0.00663851
ENSG00000125246	CLYBL	protein_coding	82.0375	-0.649383	-3.36982	0.000752186	0.00666002
ENSG00000108424	KPNB1	protein_coding	7284.39	0.381751	3.36899	0.000754447	0.00667176
ENSG00000233030	RP11-196G18.3	antisense	18.5462	1.48399	3.36906	0.000754251	0.00667176
ENSG00000230629	RPS23P8	processed_pseudogene	97.4186	-0.526694	-3.3675	0.000758538	0.00670378
ENSG00000044446	PHKA2	protein_coding	1090.93	0.502022	3.36606	0.000762497	0.0067346
ENSG00000213903	LTB4R	protein_coding	2865.78	0.634644	3.36435	0.000767235	0.00677226
ENSG00000144635	DYNC1LI1	protein_coding	1394.02	0.362088	3.36293	0.000771206	0.0067989
ENSG00000162636	FAM102B	protein_coding	361.619	0.421743	3.36294	0.000771168	0.0067989
ENSG00000136573	BLK	protein_coding	795.581	-0.380747	-3.36154	0.000775104	0.00682905
ENSG00000204482	LST1	protein_coding	10588.1	0.432154	3.36123	0.000775953	0.00683232
ENSG00000198948	MFAP3L	protein_coding	232.744	0.484989	3.35995	0.000779553	0.00685616
ENSG00000250687	RP11-497H16.7	transcribed_unprocessed_pseudogene	158.255	0.658861	3.35993	0.000779622	0.00685616
ENSG00000118217	ATF6	protein_coding	1496.89	0.270022	3.35845	0.000783795	0.00688861
ENSG00000142627	EPHA2	protein_coding	43.1354	-0.963111	-3.3576	0.000786232	0.00690153
ENSG00000268240	RP11-678G14.4	lincRNA	18.6941	1.37192	3.35773	0.00078584	0.00690153
ENSG00000116260	QSOX1	protein_coding	2113.07	0.329408	3.35723	0.000787268	0.00690638
ENSG00000143702	CEP170	protein_coding	905.576	0.471309	3.3564	0.000789633	0.00692287
ENSG00000092531	SNAP23	protein_coding	3784.46	0.392045	3.35599	0.000790809	0.00692892
ENSG00000063241	ISOC2	protein_coding	213.771	-0.479784	-3.35548	0.000792267	0.0069352
ENSG00000240184	PCDHGC3	protein_coding	35.293	-1.24221	-3.3554	0.000792497	0.0069352
ENSG00000117222	RBBP5	protein_coding	729.909	0.263776	3.352	0.000802298	0.00701608
ENSG00000179222	MAGED1	protein_coding	579.851	-0.368675	-3.35185	0.000802723	0.00701608
ENSG00000149084	HSD17B12	protein_coding	418.861	0.335268	3.35156	0.00080357	0.00701919
ENSG00000064763	FAR2	protein_coding	519.923	0.445543	3.35015	0.000807682	0.00705079
ENSG00000138413	IDH1	protein_coding	737.434	0.314816	3.3495	0.000809585	0.00706308
ENSG00000132635	PCED1A	protein_coding	569.358	-0.382312	-3.34829	0.000813127	0.00708557
ENSG00000214018	RRM2P3	processed_pseudogene	14.4949	1.39643	3.34828	0.000813155	0.00708557
ENSG00000036257	CUL3	protein_coding	2011.24	0.284168	3.3469	0.000817195	0.00711643
ENSG00000135506	OS9	protein_coding	8237.67	0.369337	3.3459	0.000820145	0.00713777
ENSG00000008710	PKD1	protein_coding	1014.67	-0.33833	-3.34498	0.000822882	0.00715286
ENSG00000130052	STARD8	protein_coding	221.073	0.498893	3.34501	0.000822807	0.00715286
ENSG00000271856	LINC01215	lincRNA	287.406	-0.449636	-3.34477	0.000823497	0.00715385
ENSG00000163812	ZDHHC3	protein_coding	1378.75	0.261551	3.34111	0.000834434	0.00724266
ENSG00000196365	LONP1	protein_coding	767.002	-0.31735	-3.34101	0.000834736	0.00724266
ENSG00000149532	CPSF7	protein_coding	2979.51	0.357912	3.34076	0.000835482	0.00724474
ENSG00000175602	CCDC85B	protein_coding	935.436	-0.455632	-3.3389	0.000841107	0.00728908
ENSG00000136213	CHST12	protein_coding	667.779	-0.384818	-3.33835	0.000842761	0.00729898
ENSG00000180900	SCRIB	protein_coding	805.167	-0.275729	-3.33754	0.000845221	0.00731585
ENSG00000021300	PLEKHB1	protein_coding	442.06	-0.38001	-3.33673	0.00084771	0.0073296
ENSG00000206337	HCP5	sense_overlapping	3731.07	0.244838	3.33669	0.000847836	0.0073296
ENSG00000204424	LY6G6F	protein_coding	131.826	0.515131	3.3361	0.000849612	0.0073405
ENSG00000052749	RRP12	protein_coding	1704.61	0.417746	3.33575	0.000850694	0.00734096
ENSG00000116539	ASH1L	protein_coding	1250.35	0.271143	3.33575	0.000850685	0.00734096
ENSG00000161905	ALOX15	protein_coding	231.295	-0.613677	-3.33539	0.000851806	0.00734612
ENSG00000106991	ENG	protein_coding	613.638	0.390841	3.33508	0.000852753	0.00734984
ENSG00000157833	GAREM2	protein_coding	53.9375	-0.671285	-3.3349	0.000853287	0.00735001
ENSG00000127328	RAB3IP	protein_coding	188.359	0.381555	3.33466	0.000854051	0.00735215
ENSG00000189077	TMEM120A	protein_coding	1366.79	0.475905	3.33373	0.000856912	0.00737233
ENSG00000160307	S100B	protein_coding	224.504	-0.520429	-3.33239	0.000861036	0.00740336
ENSG00000163931	TKT	protein_coding	23847.4	0.46386	3.3312	0.000864733	0.00743067
ENSG00000148634	HERC4	protein_coding	986.112	0.282204	3.33024	0.00086772	0.00745185
ENSG00000197006	METTL9	protein_coding	2862.93	0.299612	3.32907	0.000871374	0.00747872
ENSG00000184990	SIVA1	protein_coding	805.663	-0.310152	-3.32857	0.000872946	0.00748771
ENSG00000160818	GPATCH4	protein_coding	269.032	-0.436807	-3.32777	0.000875429	0.0075045
ENSG00000168016	TRANK1	protein_coding	5861.82	0.453394	3.32566	0.000882101	0.00755716
ENSG00000114735	HEMK1	protein_coding	381.124	-0.4866	-3.32538	0.000882994	0.00755917
ENSG00000137101	CD72	protein_coding	323.266	-0.425267	-3.32525	0.000883395	0.00755917
ENSG00000135709	KIAA0513	protein_coding	4505.31	0.448849	3.32395	0.000887506	0.0075898
ENSG00000078369	GNB1	protein_coding	9987.27	0.24963	3.32346	0.000889083	0.00759581
ENSG00000213297	ZNF625-ZNF20	protein_coding	55.7056	-4.99064	-3.3234	0.000889273	0.00759581
ENSG00000114737	CISH	protein_coding	1166.24	-0.267321	-3.32112	0.000896573	0.00765358
ENSG00000133794	ARNTL	protein_coding	1046.62	0.3904	3.32058	0.000898301	0.00766375
ENSG00000186810	CXCR3	protein_coding	644.635	-0.435489	-3.31964	0.000901348	0.00768515
ENSG00000122733	PHF24	protein_coding	61.2768	1.00478	3.31904	0.000903267	0.00769691
ENSG00000102172	SMS	protein_coding	1138.85	0.338736	3.31554	0.000914663	0.00778937
ENSG00000197535	MYO5A	protein_coding	1449.75	0.372403	3.31487	0.000916868	0.00780349
ENSG00000131626	PPFIA1	protein_coding	1327.74	0.430782	3.3145	0.00091808	0.00780915
ENSG00000064601	CTSA	protein_coding	4981.97	0.323744	3.31309	0.000922713	0.00784032
ENSG00000100296	THOC5	protein_coding	1295.22	0.366457	3.31305	0.000922844	0.00784032
ENSG00000175137	SH3BP5L	protein_coding	2858.59	0.485621	3.31092	0.000929904	0.00789561
ENSG00000149582	TMEM25	protein_coding	121.008	-0.468626	-3.30991	0.00093327	0.00791948
ENSG00000165724	ZMYND19	protein_coding	167.867	-0.460155	-3.30737	0.000941779	0.00798694
ENSG00000023902	PLEKHO1	protein_coding	6161.22	0.301256	3.30674	0.000943892	0.0080001
ENSG00000091972	CD200	protein_coding	108.479	-0.52334	-3.30504	0.000949644	0.00804408
ENSG00000273559	CWC25	protein_coding	1055.16	0.437737	3.30471	0.000950738	0.00804857
ENSG00000013725	CD6	protein_coding	3286.36	-0.302941	-3.30425	0.000952309	0.00805709
ENSG00000132912	DCTN4	protein_coding	762.523	0.321051	3.30384	0.000953689	0.00805921
ENSG00000167315	ACAA2	protein_coding	794.767	-0.403129	-3.304	0.000953161	0.00805921
ENSG00000184634	MED12	protein_coding	1469.43	0.379006	3.30362	0.000954466	0.008061
ENSG00000108774	RAB5C	protein_coding	6582.56	0.325798	3.30309	0.000956268	0.00807145
ENSG00000128050	PAICS	protein_coding	441.175	-0.416855	-3.30139	0.000962078	0.00811569
ENSG00000165682	CLEC1B	protein_coding	75.2465	0.682375	3.30031	0.000965781	0.00814211
ENSG00000132323	ILKAP	protein_coding	401.44	-0.355243	-3.30002	0.000966767	0.00814424
ENSG00000166685	COG1	protein_coding	576.729	-0.287439	-3.29991	0.000967174	0.00814424
ENSG00000054118	THRAP3	protein_coding	3816.92	0.24998	3.29953	0.00096846	0.00815025
ENSG00000097033	SH3GLB1	protein_coding	3133.47	0.334218	3.29918	0.000969661	0.00815145
ENSG00000186432	KPNA4	protein_coding	1629.71	0.278996	3.299	0.000970316	0.00815145
ENSG00000198695	MT-ND6	protein_coding	530.763	0.431501	3.29906	0.000970075	0.00815145
ENSG00000131051	RBM39	protein_coding	3907.65	0.354031	3.29849	0.000972064	0.00816134
ENSG00000145687	SSBP2	protein_coding	488.589	0.351163	3.29808	0.000973479	0.00816742
ENSG00000241839	PLEKHO2	protein_coding	9588.51	0.412917	3.29795	0.000973933	0.00816742
ENSG00000110046	ATG2A	protein_coding	3510.05	0.601431	3.29704	0.000977103	0.00818439
ENSG00000143622	RIT1	protein_coding	1484.58	0.375619	3.29709	0.000976914	0.00818439
ENSG00000101335	MYL9	protein_coding	813.085	0.391051	3.2934	0.000989844	0.00828624
ENSG00000105281	SLC1A5	protein_coding	1144.9	-0.330813	-3.2919	0.000995119	0.00832551
ENSG00000173933	RBM4	protein_coding	2175.92	0.245819	3.29168	0.000995908	0.00832724
ENSG00000177570	SAMD12	protein_coding	21.775	-1.12089	-3.29143	0.000996795	0.00832978
ENSG00000174080	CTSF	protein_coding	165.484	-0.468086	-3.29111	0.000997925	0.00833434
ENSG00000090447	TFAP4	protein_coding	221.757	-0.424866	-3.29001	0.00100183	0.00836208
ENSG00000139117	CPNE8	protein_coding	111.574	0.552442	3.28951	0.00100362	0.0083721
ENSG00000186591	UBE2H	protein_coding	2577.66	0.27654	3.2892	0.00100472	0.00837638
ENSG00000168961	LGALS9	protein_coding	4345.65	0.309699	3.28901	0.0010054	0.00837716
ENSG00000100934	SEC23A	protein_coding	754.363	0.252462	3.28811	0.00100864	0.00839899
ENSG00000255135	RP11-111M22.3	lincRNA	33.3193	-0.933588	-3.28795	0.0010092	0.00839899
ENSG00000088543	C3orf18	protein_coding	145.323	-0.513188	-3.28774	0.00100993	0.00840022
ENSG00000160285	LSS	protein_coding	613.89	-0.33094	-3.28599	0.00101626	0.00844791
ENSG00000071242	RPS6KA2	protein_coding	174.231	-0.458022	-3.28546	0.00101817	0.0084589
ENSG00000102804	TSC22D1	protein_coding	994.616	0.333587	3.28365	0.00102471	0.00849839
ENSG00000155366	RHOC	protein_coding	1363.74	-0.413954	-3.28369	0.00102456	0.00849839
ENSG00000188825	LINC00910	lincRNA	65.2666	-0.662496	-3.28374	0.0010244	0.00849839
ENSG00000261804	RP11-44F14.2	lincRNA	151.808	0.755712	3.28268	0.00102825	0.00852281
ENSG00000196405	EVL	protein_coding	5173.38	-0.306683	-3.28251	0.00102886	0.00852286
ENSG00000246526	RP11-539L10.2	lincRNA	80.9859	-0.639468	-3.28126	0.00103346	0.00855603
ENSG00000255571	MIR9-3HG	lincRNA	84.0376	-0.551833	-3.28075	0.00103533	0.00856655
ENSG00000261487	AC135048.13	processed_transcript	51.3157	0.848234	3.28017	0.00103745	0.00857912
ENSG00000272502	RP11-713M15.2	antisense	31.8997	-1.11932	-3.27973	0.00103905	0.00858735
ENSG00000185803	SLC52A2	protein_coding	513.461	-0.330316	-3.27891	0.00104209	0.00860748
ENSG00000254635	WAC-AS1	antisense	409.092	-0.355235	-3.2776	0.00104693	0.00864245
ENSG00000133104	SPG20	protein_coding	728.513	0.294031	3.27715	0.00104862	0.0086514
ENSG00000154016	GRAP	protein_coding	1155.14	-0.311083	-3.27686	0.0010497	0.00865531
ENSG00000171703	TCEA2	protein_coding	228.334	-0.366883	-3.27553	0.00105463	0.00869094
ENSG00000100938	GMPR2	protein_coding	2012.73	0.315449	3.2743	0.00105922	0.00872377
ENSG00000173614	NMNAT1	protein_coding	252.707	0.409892	3.27361	0.00106182	0.00874013
ENSG00000276649	RP5-858L17.1	antisense	55.4095	0.84209	3.27312	0.00106366	0.00875023
ENSG00000159339	PADI4	protein_coding	4929.78	1.19919	3.2726	0.00106561	0.00876124
ENSG00000072274	TFRC	protein_coding	374.126	-0.320541	-3.27151	0.00106975	0.00878508
ENSG00000110080	ST3GAL4	protein_coding	857.548	0.421529	3.2715	0.00106978	0.00878508
ENSG00000131467	PSME3	protein_coding	3148.95	0.281758	3.27135	0.00107036	0.00878508
ENSG00000054267	ARID4B	protein_coding	1866.14	0.314096	3.27091	0.00107203	0.00879305
ENSG00000107290	SETX	protein_coding	4162.25	0.299641	3.27077	0.00107256	0.00879305
ENSG00000082781	ITGB5	protein_coding	425.463	0.381317	3.27027	0.00107444	0.00880334
ENSG00000168995	SIGLEC7	protein_coding	1036.82	0.421312	3.26891	0.00107963	0.00884084
ENSG00000129450	SIGLEC9	protein_coding	2120.88	0.4777	3.26756	0.00108479	0.00886416
ENSG00000133422	MORC2	protein_coding	762.707	-0.37226	-3.26751	0.00108496	0.00886416
ENSG00000172661	WASHC2C	protein_coding	2036.77	0.291371	3.2677	0.00108426	0.00886416
ENSG00000177239	MAN1B1	protein_coding	1084.04	-0.237112	-3.26773	0.00108415	0.00886416
ENSG00000154764	WNT7A	protein_coding	57.9954	-0.657488	-3.26671	0.00108806	0.00888435
ENSG00000119714	GPR68	protein_coding	317.906	-0.48965	-3.26643	0.00108912	0.00888791
ENSG00000205078	SYCE1L	protein_coding	18.5453	-1.10847	-3.26605	0.00109058	0.00889481
ENSG00000115946	PNO1	protein_coding	161.601	-0.461003	-3.26575	0.00109173	0.00889909
ENSG00000143570	SLC39A1	protein_coding	1548.8	0.253128	3.26467	0.00109592	0.00892814
ENSG00000241878	PISD	protein_coding	5164.5	0.458536	3.26401	0.00109849	0.00894392
ENSG00000213145	CRIP1	protein_coding	3335.37	0.310283	3.26344	0.00110069	0.00895674
ENSG00000102893	PHKB	protein_coding	942.956	0.29419	3.26327	0.00110133	0.00895684
ENSG00000183475	ASB7	protein_coding	577.591	0.290865	3.26285	0.00110298	0.00896516
ENSG00000100439	ABHD4	protein_coding	1666.34	0.436378	3.26254	0.00110419	0.00896987
ENSG00000174851	YIF1A	protein_coding	336.862	-0.372455	-3.26222	0.00110545	0.00897502
ENSG00000180096	SEPT1	protein_coding	2597.83	-0.301322	-3.26113	0.00110969	0.00900433
ENSG00000204946	ZNF783	protein_coding	398.129	-0.326101	-3.26016	0.0011135	0.00903011
ENSG00000284308	C2orf81	protein_coding	46.7107	-0.777505	-3.25974	0.00111515	0.00903832
ENSG00000087269	NOP14	protein_coding	628.496	-0.350615	-3.25922	0.00111719	0.0090446
ENSG00000151876	FBXO4	protein_coding	106.913	-0.548214	-3.25925	0.00111706	0.0090446
ENSG00000137486	ARRB1	protein_coding	2304.27	0.29901	3.25661	0.0011275	0.00912294
ENSG00000188026	RILPL1	protein_coding	74.2425	0.678383	3.256	0.00112993	0.00913741
ENSG00000173221	GLRX	protein_coding	2821.95	0.273977	3.25519	0.00113316	0.00915831
ENSG00000243989	ACY1	protein_coding	103.549	-0.551041	-3.25383	0.00113859	0.00919699
ENSG00000100450	GZMH	protein_coding	1590.94	-0.548468	-3.25306	0.00114169	0.00921684
ENSG00000106628	POLD2	protein_coding	508.814	-0.38101	-3.25266	0.00114329	0.00922453
ENSG00000162496	DHRS3	protein_coding	416.888	-0.392643	-3.25126	0.00114896	0.00926502
ENSG00000116455	WDR77	protein_coding	551.514	-0.304841	-3.25081	0.00115077	0.00927365
ENSG00000186594	MIR22HG	lincRNA	232.222	0.441345	3.25067	0.00115133	0.00927365
ENSG00000196712	NF1	protein_coding	642.111	0.290235	3.25025	0.00115305	0.00928225
ENSG00000258130	RP11-347C12.3	protein_coding	21.6192	-1.11804	-3.24978	0.00115495	0.00929235
ENSG00000112182	BACH2	protein_coding	781.5	-0.428402	-3.24916	0.00115745	0.00930719
ENSG00000259330	INAFM2	protein_coding	931.786	0.315627	3.24866	0.00115949	0.00931837
ENSG00000005961	ITGA2B	protein_coding	1754.26	0.380976	3.24762	0.00116375	0.00934207
ENSG00000099942	CRKL	protein_coding	3097.24	0.233267	3.24776	0.00116318	0.00934207
ENSG00000119943	PYROXD2	protein_coding	93.2762	-0.493439	-3.24597	0.00117049	0.00938565
ENSG00000171497	PPID	protein_coding	758.19	0.268787	3.24613	0.00116984	0.00938565
ENSG00000125505	MBOAT7	protein_coding	18627.3	0.543905	3.24375	0.00117967	0.00945389
ENSG00000066336	SPI1	protein_coding	23377.5	0.458033	3.24314	0.00118221	0.00945838
ENSG00000100614	PPM1A	protein_coding	2440.66	0.374146	3.24332	0.00118147	0.00945838
ENSG00000105851	PIK3CG	protein_coding	1592.87	0.398299	3.24319	0.001182	0.00945838
ENSG00000137441	FGFBP2	protein_coding	1878.89	-0.529466	-3.24153	0.0011889	0.00950654
ENSG00000156052	GNAQ	protein_coding	1594.46	0.381312	3.23896	0.00119966	0.00958717
ENSG00000132357	CARD6	protein_coding	632.804	0.450329	3.23857	0.00120129	0.00959489
ENSG00000176623	RMDN1	protein_coding	330.769	-0.38814	-3.2383	0.00120243	0.00959856
ENSG00000111011	RSRC2	protein_coding	1221.64	0.271645	3.23723	0.00120696	0.00962939
ENSG00000265118	CTD-2370N5.3	protein_coding	247.938	0.838031	3.23684	0.0012086	0.0096371
ENSG00000151882	CCL28	protein_coding	86.0408	-0.632106	-3.23589	0.00121265	0.00966395
ENSG00000168404	MLKL	protein_coding	1209.23	0.499868	3.23515	0.0012158	0.00968363
ENSG00000152672	CLEC4F	protein_coding	20.1941	-1.34558	-3.2337	0.00122199	0.00972756
ENSG00000204160	ZDHHC18	protein_coding	16197.1	0.524939	3.23303	0.00122486	0.00974496
ENSG00000187554	TLR5	protein_coding	346.32	0.418975	3.23265	0.00122647	0.0097523
ENSG00000273329	RP11-448A19.1	lincRNA	27.2373	-0.903481	-3.23211	0.00122879	0.00976531
ENSG00000111252	SH2B3	protein_coding	3527.21	0.239864	3.23183	0.00123002	0.00976742
ENSG00000120889	TNFRSF10B	protein_coding	1774.18	0.40475	3.23173	0.00123042	0.00976742
ENSG00000076685	NT5C2	protein_coding	2743.81	0.430553	3.23076	0.00123462	0.00979528
ENSG00000128694	OSGEPL1	protein_coding	83.2632	-0.575603	-3.22844	0.00124466	0.00985853
ENSG00000150753	CCT5	protein_coding	2902.84	0.22481	3.22845	0.00124464	0.00985853
ENSG00000236144	TMEM147-AS1	antisense	113.289	-0.643864	-3.22868	0.00124362	0.00985853
ENSG00000119541	VPS4B	protein_coding	2151.09	0.273767	3.22826	0.00124544	0.00985921
ENSG00000104904	OAZ1	protein_coding	45221.8	0.307985	3.22745	0.00124898	0.00988178
ENSG00000253981	ALG1L13P	transcribed_unprocessed_pseudogene	246.516	0.694349	3.22625	0.00125424	0.00991785
ENSG00000283761	RP4-714D9.5	protein_coding	37.6054	1.04326	3.2255	0.00125751	0.0099382
ENSG00000093167	LRRFIP2	protein_coding	756.363	0.348487	3.22516	0.00125902	0.00993918
ENSG00000157557	ETS2	protein_coding	2295.26	0.39723	3.22525	0.00125862	0.00993918
ENSG00000117475	BLZF1	protein_coding	310.762	0.366092	3.22286	0.00126918	0.0100138
ENSG00000159618	ADGRG5	protein_coding	567.176	-0.360984	-3.22158	0.00127487	0.0100476
ENSG00000168092	PAFAH1B2	protein_coding	1261.11	0.249583	3.22162	0.00127466	0.0100476
ENSG00000177606	JUN	protein_coding	540.775	0.368863	3.22051	0.00127963	0.0100795
ENSG00000164081	TEX264	protein_coding	838.952	-0.288287	-3.22015	0.00128125	0.0100826
ENSG00000204420	MPIG6B	protein_coding	925.173	0.38908	3.22011	0.00128143	0.0100826
ENSG00000112715	VEGFA	protein_coding	301.796	0.649207	3.21863	0.00128807	0.0101292
ENSG00000204304	PBX2	protein_coding	7460.2	0.476958	3.21837	0.00128919	0.0101325
ENSG00000178057	NDUFAF3	protein_coding	822.871	-0.259004	-3.21774	0.00129204	0.0101493
ENSG00000139496	NUP58	protein_coding	1028.23	0.433918	3.21619	0.00129903	0.0101963
ENSG00000236345	RP11-59D5__B.2	antisense	141.734	0.691242	3.2161	0.00129945	0.0101963
ENSG00000115128	SF3B6	protein_coding	1093.56	0.276375	3.2157	0.00130126	0.0102049
ENSG00000184900	SUMO3	protein_coding	1126.81	-0.299965	-3.21266	0.00131512	0.0103079
ENSG00000185896	LAMP1	protein_coding	4994.48	0.280663	3.21174	0.00131936	0.0103354
ENSG00000137337	MDC1	protein_coding	570.828	-0.314332	-3.21141	0.00132087	0.0103416
ENSG00000183688	RFLNB	protein_coding	5642.45	0.525154	3.21124	0.00132165	0.0103421
ENSG00000113273	ARSB	protein_coding	500.57	0.36877	3.21104	0.00132254	0.0103434
ENSG00000151883	PARP8	protein_coding	3715.95	0.378054	3.2104	0.00132549	0.0103551
ENSG00000186174	BCL9L	protein_coding	3352.93	-0.278111	-3.21044	0.00132534	0.0103551
ENSG00000185379	RAD51D	protein_coding	266.27	-0.369708	-3.21024	0.00132623	0.0103552
ENSG00000122971	ACADS	protein_coding	286.727	-0.358375	-3.20952	0.00132959	0.0103757
ENSG00000180822	PSMG4	protein_coding	160.804	-0.429333	-3.20886	0.00133264	0.0103939
ENSG00000120885	CLU	protein_coding	2794.57	0.385002	3.2081	0.00133613	0.0104118
ENSG00000177374	HIC1	protein_coding	98.6012	-0.643706	-3.20805	0.0013364	0.0104118
ENSG00000100647	SUSD6	protein_coding	6464.55	0.443079	3.20773	0.00133786	0.0104175
ENSG00000160551	TAOK1	protein_coding	1371.11	0.316519	3.20717	0.00134049	0.0104323
ENSG00000110651	CD81	protein_coding	2944.23	-0.310142	-3.20526	0.00134939	0.0104901
ENSG00000117410	ATP6V0B	protein_coding	6372.92	0.384852	3.2054	0.00134873	0.0104901
ENSG00000196305	IARS	protein_coding	737.551	-0.293434	-3.20491	0.00135102	0.0104971
ENSG00000161999	JMJD8	protein_coding	626.499	-0.294913	-3.20282	0.00136088	0.0105622
ENSG00000163904	SENP2	protein_coding	715.973	0.273246	3.20291	0.00136047	0.0105622
ENSG00000090975	PITPNM2	protein_coding	600.64	-0.330584	-3.20251	0.00136236	0.0105679
ENSG00000173120	KDM2A	protein_coding	6393.78	0.31217	3.20194	0.00136507	0.0105832
ENSG00000103769	RAB11A	protein_coding	2124.53	0.262909	3.20046	0.0013721	0.0106319
ENSG00000155313	USP25	protein_coding	1371.31	0.258883	3.20025	0.00137309	0.0106338
ENSG00000089159	PXN	protein_coding	16131.1	0.417752	3.19919	0.00137816	0.0106673
ENSG00000170581	STAT2	protein_coding	2649.3	0.320801	3.1987	0.00138047	0.0106794
ENSG00000144566	RAB5A	protein_coding	1078.82	0.317741	3.19718	0.00138777	0.010721
ENSG00000175182	FAM131A	protein_coding	470.014	0.441305	3.19711	0.0013881	0.010721
ENSG00000244560	RP4-800G7.2	transcribed_unprocessed_pseudogene	53.9983	-0.854965	-3.19717	0.00138785	0.010721
ENSG00000262468	LINC01569	lincRNA	21.4697	-1.1326	-3.19526	0.00139703	0.0107841
ENSG00000160213	CSTB	protein_coding	2093.42	0.235739	3.19252	0.00141037	0.0108797
ENSG00000177542	SLC25A22	protein_coding	420.779	-0.312772	-3.1924	0.00141094	0.0108797
ENSG00000114353	GNAI2	protein_coding	31029.5	0.328349	3.19173	0.00141424	0.0108992
ENSG00000160877	NACC1	protein_coding	1405.34	0.285802	3.18963	0.00142453	0.0109727
ENSG00000173141	MRPL57	protein_coding	330.116	-0.391078	-3.18903	0.00142753	0.0109899
ENSG00000165092	ALDH1A1	protein_coding	562.1	0.447381	3.18771	0.00143404	0.011034
ENSG00000118689	FOXO3	protein_coding	2498.82	0.414291	3.1859	0.00144304	0.0110972
ENSG00000090924	PLEKHG2	protein_coding	405.506	-0.351221	-3.18486	0.00144825	0.0111215
ENSG00000172493	AFF1	protein_coding	1567.79	0.347595	3.1848	0.00144853	0.0111215
ENSG00000259332	ST20-MTHFS	protein_coding	135.838	0.7435	3.18489	0.00144811	0.0111215
ENSG00000254788	CKLF-CMTM1	protein_coding	93.3724	0.938756	3.18405	0.0014523	0.0111445
ENSG00000065534	MYLK	protein_coding	236.973	0.481584	3.1833	0.00145608	0.0111557
ENSG00000176783	RUFY1	protein_coding	1977.89	0.283322	3.18354	0.00145486	0.0111557
ENSG00000268996	MAN1B1-AS1	antisense	21.3832	-1.03526	-3.18329	0.00145611	0.0111557
ENSG00000178607	ERN1	protein_coding	2870.78	0.297116	3.18236	0.00146081	0.0111857
ENSG00000110931	CAMKK2	protein_coding	3405.85	0.400486	3.18082	0.00146858	0.0112391
ENSG00000004975	DVL2	protein_coding	534.412	-0.275624	-3.17935	0.00147604	0.0112842
ENSG00000270629	NBPF14	protein_coding	1642.31	0.308226	3.17942	0.0014757	0.0112842
ENSG00000104312	RIPK2	protein_coding	476.385	0.321595	3.17918	0.0014769	0.0112847
ENSG00000153187	HNRNPU	protein_coding	8492.74	0.201563	3.17842	0.00148079	0.0113084
ENSG00000173198	CYSLTR1	protein_coding	555.52	0.382635	3.17743	0.00148586	0.011341
ENSG00000198873	GRK5	protein_coding	1210.03	0.324086	3.17706	0.00148775	0.0113494
ENSG00000213639	PPP1CB	protein_coding	2560.41	0.295156	3.17658	0.00149021	0.0113621
ENSG00000102908	NFAT5	protein_coding	537.729	0.520435	3.17514	0.00149762	0.0114125
ENSG00000110713	NUP98	protein_coding	3629.3	0.353688	3.17449	0.00150101	0.0114322
ENSG00000110934	BIN2	protein_coding	12449.7	0.392102	3.17245	0.00151161	0.0115068
ENSG00000172006	ZNF554	protein_coding	80.4659	-0.574567	-3.17113	0.00151847	0.0115529
ENSG00000167543	TP53I13	protein_coding	637.835	-0.366902	-3.1706	0.00152125	0.0115617
ENSG00000182149	IST1	protein_coding	4943.64	0.266742	3.17063	0.00152107	0.0115617
ENSG00000166068	SPRED1	protein_coding	68.0735	-0.7676	-3.16999	0.00152443	0.0115796
ENSG00000180316	PNPLA1	protein_coding	159.676	0.830946	3.16596	0.0015457	0.011735
ENSG00000234745	HLA-B	protein_coding	141065	0.312753	3.16572	0.00154701	0.0117387
ENSG00000037474	NSUN2	protein_coding	1067.13	-0.251186	-3.16408	0.00155576	0.0117929
ENSG00000100889	PCK2	protein_coding	523.282	-0.356322	-3.16407	0.00155581	0.0117929
ENSG00000115687	PASK	protein_coding	640.15	-0.290378	-3.1621	0.00156634	0.0118497
ENSG00000131876	SNRPA1	protein_coding	378.139	-0.348974	-3.16203	0.00156675	0.0118497
ENSG00000143889	HNRNPLL	protein_coding	454.886	0.292846	3.16183	0.0015678	0.0118497
ENSG00000163545	NUAK2	protein_coding	4687.15	0.448991	3.1624	0.00156474	0.0118497
ENSG00000172007	RAB33B	protein_coding	437.182	0.405664	3.16174	0.00156828	0.0118497
ENSG00000172354	GNB2	protein_coding	11836.2	0.428628	3.16181	0.00156794	0.0118497
ENSG00000100605	ITPK1	protein_coding	7725.75	0.401581	3.16093	0.00157264	0.0118763
ENSG00000119522	DENND1A	protein_coding	1038.6	0.273315	3.15883	0.00158405	0.0119562
ENSG00000170846	AC093323.3	lincRNA	365.386	-0.385872	-3.15745	0.00159154	0.0120064
ENSG00000153827	TRIP12	protein_coding	3947.01	0.253027	3.15677	0.00159528	0.0120282
ENSG00000143797	MBOAT2	protein_coding	563.65	0.44866	3.15645	0.00159704	0.0120351
ENSG00000065882	TBC1D1	protein_coding	3652.84	0.390718	3.15573	0.00160095	0.0120519
ENSG00000175970	UNC119B	protein_coding	913.459	0.28023	3.15574	0.00160093	0.0120519
ENSG00000123737	EXOSC9	protein_coding	295.868	-0.355752	-3.15537	0.00160293	0.0120604
ENSG00000271858	CYB561D2	antisense	53.4358	-0.77502	-3.15519	0.00160396	0.0120618
ENSG00000134285	FKBP11	protein_coding	611.767	-0.29802	-3.15492	0.00160544	0.0120666
ENSG00000126860	EVI2A	protein_coding	3391.32	0.357743	3.15467	0.00160679	0.0120704
ENSG00000160072	ATAD3B	protein_coding	326.445	-0.51466	-3.15382	0.00161148	0.0120992
ENSG00000175920	DOK7	protein_coding	33.9828	-0.863661	-3.15344	0.0016136	0.0121088
ENSG00000163900	TMEM41A	protein_coding	225.318	-0.417462	-3.15264	0.001618	0.0121354
ENSG00000188242	PP7080	antisense	178.24	-0.467599	-3.15196	0.00162179	0.0121575
ENSG00000189283	FHIT	protein_coding	81.5958	-0.548381	-3.15174	0.00162298	0.01216
ENSG00000046651	OFD1	protein_coding	556.536	-0.345796	-3.15058	0.00162946	0.0122021
ENSG00000237943	PRKCQ-AS1	processed_transcript	360.947	-0.344005	-3.1501	0.00163215	0.0122159
ENSG00000138795	LEF1	protein_coding	2831.82	-0.323749	-3.14788	0.00164458	0.0123024
ENSG00000103423	DNAJA3	protein_coding	643.393	-0.289588	-3.14738	0.00164738	0.012317
ENSG00000106305	AIMP2	protein_coding	209.641	-0.432451	-3.14708	0.00164908	0.0123232
ENSG00000168496	FEN1	protein_coding	267.236	-0.444848	-3.14692	0.00164999	0.0123236
ENSG00000197457	STMN3	protein_coding	1138.74	-0.30167	-3.14676	0.00165093	0.0123241
ENSG00000184898	RBM43	protein_coding	145.564	-0.438423	-3.14546	0.00165827	0.0123725
ENSG00000145990	GFOD1	protein_coding	265.155	-0.443821	-3.14399	0.00166658	0.012428
ENSG00000258301	RP11-488C13.5	lincRNA	83.9646	-0.556315	-3.14264	0.00167432	0.0124792
ENSG00000189013	KIR2DL4	protein_coding	27.8744	1.10022	3.14199	0.00167806	0.0125005
ENSG00000198301	SDAD1	protein_coding	557.952	-0.332678	-3.14162	0.00168018	0.0125098
ENSG00000167680	SEMA6B	protein_coding	21.1812	1.18801	3.14119	0.00168264	0.0125216
ENSG00000225611	LINC02158	antisense	120.026	0.498175	3.13999	0.00168952	0.0125662
ENSG00000112578	BYSL	protein_coding	125.61	-0.470626	-3.13954	0.00169213	0.0125689
ENSG00000120656	TAF12	protein_coding	754.393	0.279162	3.13954	0.00169215	0.0125689
ENSG00000213339	QTRT1	protein_coding	267.846	-0.411896	-3.13947	0.00169253	0.0125689
ENSG00000137414	FAM8A1	protein_coding	1841.1	0.371107	3.13925	0.00169381	0.0125719
ENSG00000072422	RHOBTB1	protein_coding	106.299	0.560485	3.13895	0.00169555	0.0125783
ENSG00000143321	HDGF	protein_coding	4579.54	0.241504	3.13869	0.00169703	0.0125827
ENSG00000104884	ERCC2	protein_coding	259.558	-0.391558	-3.1385	0.00169818	0.0125847
ENSG00000259642	ST20-AS1	antisense	156.738	0.535948	3.13808	0.00170059	0.012596
ENSG00000164938	TP53INP1	protein_coding	2002.45	0.445821	3.13696	0.00170708	0.0126375
ENSG00000160785	SLC25A44	protein_coding	2471.04	0.391893	3.13618	0.00171165	0.0126582
ENSG00000179119	SPTY2D1	protein_coding	881.179	0.266194	3.13633	0.00171077	0.0126582
ENSG00000169062	UPF3A	protein_coding	486.067	-0.290247	-3.13582	0.00171377	0.0126673
ENSG00000121807	CCR2	protein_coding	2206.32	0.37895	3.13475	0.00172003	0.012707
ENSG00000101152	DNAJC5	protein_coding	4585.66	0.326161	3.13359	0.0017268	0.0127504
ENSG00000103245	NARFL	protein_coding	435.357	-0.322694	-3.13316	0.00172937	0.0127563
ENSG00000109323	MANBA	protein_coding	1542.41	0.341559	3.13315	0.00172938	0.0127563
ENSG00000105576	TNPO2	protein_coding	726.992	-0.265318	-3.13281	0.00173141	0.0127622
ENSG00000131238	PPT1	protein_coding	8036.76	0.344928	3.13253	0.00173307	0.0127622
ENSG00000154767	XPC	protein_coding	2019.44	0.294468	3.13227	0.00173462	0.0127622
ENSG00000162378	ZYG11B	protein_coding	547.431	0.338114	3.13226	0.00173465	0.0127622
ENSG00000170074	FAM153A	protein_coding	60.444	-0.738152	-3.13228	0.00173453	0.0127622
ENSG00000215375	MYL5	protein_coding	70.0847	-0.577521	-3.1317	0.00173795	0.0127799
ENSG00000176720	BOK	protein_coding	56.1224	-0.790077	-3.13012	0.00174737	0.0128426
ENSG00000141506	PIK3R5	protein_coding	7449.15	0.406725	3.12957	0.00175063	0.0128599
ENSG00000149527	PLCH2	protein_coding	271.601	-0.590166	-3.1293	0.00175221	0.0128648
ENSG00000269404	SPIB	protein_coding	797.931	-0.348438	-3.12906	0.00175368	0.012869
ENSG00000185963	BICD2	protein_coding	2661.13	0.356366	3.12746	0.00176323	0.0129324
ENSG00000272414	FAM47E-STBD1	protein_coding	23.1905	-1.27631	-3.12644	0.00176937	0.0129708
ENSG00000188056	TREML4	protein_coding	153.974	0.843839	3.12547	0.00177523	0.0130071
ENSG00000166716	ZNF592	protein_coding	3558.35	0.381336	3.12494	0.0017784	0.0130237
ENSG00000130038	CRACR2A	protein_coding	366.3	0.422913	3.12401	0.00178407	0.0130584
ENSG00000055609	KMT2C	protein_coding	2470.05	0.377035	3.12374	0.00178566	0.0130634
ENSG00000069943	PIGB	protein_coding	368.744	0.396188	3.12297	0.00179035	0.0130857
ENSG00000100393	EP300	protein_coding	3876.67	0.38524	3.12294	0.00179054	0.0130857
ENSG00000196781	TLE1	protein_coding	279.129	-0.421493	-3.12226	0.00179466	0.0131091
ENSG00000119408	NEK6	protein_coding	1046.34	0.497304	3.12142	0.00179978	0.0131398
ENSG00000163848	ZNF148	protein_coding	992.441	0.273992	3.12103	0.00180218	0.0131506
ENSG00000114302	PRKAR2A	protein_coding	853.066	0.256432	3.12073	0.00180401	0.0131572
ENSG00000112242	E2F3	protein_coding	1380.67	0.433982	3.12003	0.00180832	0.0131819
ENSG00000197928	ZNF677	protein_coding	82.2229	-0.621813	-3.11805	0.00182053	0.0132641
ENSG00000118513	MYB	protein_coding	86.477	-0.489053	-3.11768	0.00182282	0.0132741
ENSG00000080546	SESN1	protein_coding	763.221	-0.328161	-3.11726	0.00182543	0.0132862
ENSG00000102096	PIM2	protein_coding	4446.01	0.295319	3.11672	0.00182873	0.0133035
ENSG00000170909	OSCAR	protein_coding	2589.95	0.458499	3.1157	0.00183507	0.0133428
ENSG00000135929	CYP27A1	protein_coding	2522.44	0.501943	3.11515	0.00183852	0.0133611
ENSG00000203804	ADAMTSL4-AS1	processed_transcript	56.8986	0.942261	3.11468	0.00184145	0.0133756
ENSG00000070731	ST6GALNAC2	protein_coding	1141.69	0.484265	3.11331	0.00185002	0.013431
ENSG00000143079	CTTNBP2NL	protein_coding	52.8401	0.748896	3.11301	0.00185191	0.0134379
ENSG00000068650	ATP11A	protein_coding	2295.12	0.47579	3.11228	0.0018565	0.0134643
ENSG00000248323	LUCAT1	lincRNA	280.602	0.77131	3.1119	0.00185885	0.0134745
ENSG00000215908	CROCCP2	transcribed_unprocessed_pseudogene	559.317	-0.30397	-3.11174	0.0018599	0.0134753
ENSG00000109133	TMEM33	protein_coding	995.663	0.326653	3.11035	0.00186865	0.0135318
ENSG00000180370	PAK2	protein_coding	6071.82	0.334687	3.11019	0.00186965	0.0135322
ENSG00000165115	KIF27	protein_coding	207.172	0.737177	3.10975	0.00187246	0.0135457
ENSG00000204568	MRPS18B	protein_coding	747.327	-0.296606	-3.10847	0.00188057	0.0135975
ENSG00000101849	TBL1X	protein_coding	3774.78	0.401536	3.10772	0.00188539	0.0136254
ENSG00000015475	BID	protein_coding	3736.62	0.285964	3.10755	0.00188643	0.013626
ENSG00000145476	CYP4V2	protein_coding	225.852	-0.386559	-3.10678	0.0018914	0.0136446
ENSG00000179958	DCTPP1	protein_coding	340.34	-0.40522	-3.10679	0.00189133	0.0136446
ENSG00000276278	RP11-182J1.3	antisense	20.0446	-1.18774	-3.1067	0.00189187	0.0136446
ENSG00000005436	GCFC2	protein_coding	104.007	-0.577092	-3.10566	0.00189852	0.0136787
ENSG00000035403	VCL	protein_coding	4579.86	0.287538	3.10577	0.00189783	0.0136787
ENSG00000139626	ITGB7	protein_coding	3595.73	-0.278056	-3.10544	0.00189997	0.0136822
ENSG00000133639	BTG1	protein_coding	13505.5	0.292657	3.10399	0.00190931	0.0137426
ENSG00000117139	KDM5B	protein_coding	1053.19	0.414832	3.10377	0.00191073	0.0137441
ENSG00000188822	CNR2	protein_coding	334.12	-0.324451	-3.10366	0.00191144	0.0137441
ENSG00000143614	GATAD2B	protein_coding	2020.8	0.326456	3.10343	0.00191293	0.0137479
ENSG00000162923	WDR26	protein_coding	3280.15	0.342644	3.10251	0.00191885	0.0137835
ENSG00000165813	CCDC186	protein_coding	675.612	0.332233	3.10097	0.00192886	0.0138484
ENSG00000187713	TMEM203	protein_coding	659.312	-0.325685	-3.1007	0.00193066	0.0138544
ENSG00000102967	DHODH	protein_coding	112.965	-0.582355	-3.10003	0.00193503	0.0138788
ENSG00000184441	AP001062.7	antisense	69.5619	-0.603521	-3.09833	0.00194617	0.0139516
ENSG00000114416	FXR1	protein_coding	1215.35	0.272599	3.09671	0.00195682	0.0140209
ENSG00000165630	PRPF18	protein_coding	402.144	0.294076	3.09573	0.00196332	0.0140605
ENSG00000010318	PHF7	protein_coding	55.0949	-0.634129	-3.09473	0.0019699	0.0140703
ENSG00000092847	AGO1	protein_coding	1349.03	0.263665	3.09465	0.00197044	0.0140703
ENSG00000112667	DNPH1	protein_coding	220.894	-0.417081	-3.09472	0.00197001	0.0140703
ENSG00000114796	KLHL24	protein_coding	905.836	0.248934	3.09518	0.00196692	0.0140703
ENSG00000118515	SGK1	protein_coding	2811.05	0.332825	3.09463	0.00197061	0.0140703
ENSG00000174600	CMKLR1	protein_coding	516.367	-0.448112	-3.09515	0.00196715	0.0140703
[truncated: 56,234 more rows]

## Sheet: protein DE genes
Ensembl	Symbol	Gene_type	baseMean	log2FoldChange	stat	pvalue	padj	Significant	Mean_TPM
ENSG00000260342	RP11-1035H13.3	protein_coding	25.7843	5.31136	2.26952	0.0232368	0.0866177	FDR < 0.10	2.19071
ENSG00000248672	LY75-CD302	protein_coding	46.2015	3.32568	2.50955	0.0120884	0.053633	FDR < 0.10	0.425714
ENSG00000124882	EREG	protein_coding	38.4295	3.16343	8.80777	1.27661e-18	1.07182e-15	FDR < 0.10	0.557857
ENSG00000274276	CBSL	protein_coding	21.6088	2.49521	4.43193	9.33925e-06	0.000229431	FDR < 0.10	0.69
ENSG00000274049	INO80B-WBP1	protein_coding	122.422	2.25278	2.64548	0.00815747	0.0405968	FDR < 0.10	4.11286
ENSG00000125740	FOSB	protein_coding	213.833	2.18195	9.33832	9.78708e-21	1.55212e-17	FDR < 0.10	3.68571
ENSG00000153234	NR4A2	protein_coding	96.8435	2.07912	10.261	1.05643e-24	3.01567e-21	FDR < 0.10	1.83929
ENSG00000152463	OLAH	protein_coding	18.0824	2.0693	4.49715	6.88698e-06	0.000182063	FDR < 0.10	0.660714
ENSG00000259171	RP11-903H12.5	protein_coding	24.386	2.03338	3.63059	0.000282774	0.00313086	FDR < 0.10	0.925
ENSG00000137094	DNAJB5	protein_coding	222.295	1.78638	12.2566	1.54839e-34	2.21002e-30	FDR < 0.10	5.22
ENSG00000008056	SYN1	protein_coding	15.5079	1.71101	4.01544	5.93341e-05	0.000976789	FDR < 0.10	0.515
ENSG00000173262	SLC2A14	protein_coding	38.1644	1.64765	3.04578	0.00232077	0.0158036	FDR < 0.10	1.23786
ENSG00000257743	MGAM2	protein_coding	103.399	1.6302	5.61487	1.96708e-08	1.58622e-06	FDR < 0.10	0.777143
ENSG00000087116	ADAMTS2	protein_coding	24.3308	1.60072	3.37506	0.000737991	0.00655538	FDR < 0.10	0.504286
ENSG00000123689	G0S2	protein_coding	106.557	1.5694	5.76068	8.37752e-09	7.47327e-07	FDR < 0.10	7.66214
ENSG00000159713	TPPP3	protein_coding	421.008	1.52874	10.554	4.8658e-26	2.31498e-22	FDR < 0.10	23.6564
ENSG00000204936	CD177	protein_coding	65.1542	1.50399	4.34189	1.4126e-05	0.000322177	FDR < 0.10	1.83571
ENSG00000099985	OSM	protein_coding	235.013	1.35886	7.15808	8.18128e-13	2.20323e-10	FDR < 0.10	7.28857
ENSG00000133800	LYVE1	protein_coding	18.2552	1.34597	3.5948	0.000324641	0.00346611	FDR < 0.10	0.458571
ENSG00000170345	FOS	protein_coding	5387.16	1.3438	8.50004	1.89522e-17	1.22956e-14	FDR < 0.10	146.854
ENSG00000257315	ZBED6	protein_coding	197.686	1.34329	2.77763	0.00547576	0.0301844	FDR < 0.10	0.824286
ENSG00000179820	MYADM	protein_coding	14156	1.32008	10.3484	4.25674e-25	1.51891e-21	FDR < 0.10	318.021
ENSG00000270800	RPS10-NUDT3	protein_coding	241.359	1.2965	9.00658	2.12591e-19	2.33409e-16	FDR < 0.10	5.24929
ENSG00000182885	ADGRG3	protein_coding	5113.95	1.26747	4.38383	1.16613e-05	0.000274656	FDR < 0.10	111.254
ENSG00000146122	DAAM2	protein_coding	226.96	1.24261	2.64152	0.00825345	0.0408739	FDR < 0.10	2.13429
ENSG00000257017	HP	protein_coding	189.423	1.23514	6.82701	8.67019e-12	1.90384e-09	FDR < 0.10	8.81429
ENSG00000243709	LEFTY1	protein_coding	15.1784	1.23233	3.03975	0.00236776	0.0160242	FDR < 0.10	0.547143
ENSG00000114346	ECT2	protein_coding	74.1259	1.23148	6.06843	1.29167e-09	1.60313e-07	FDR < 0.10	1.38
ENSG00000216588	IGSF23	protein_coding	16.1279	1.23034	3.06451	0.00218025	0.0151135	FDR < 0.10	1.10357
ENSG00000179869	ABCA13	protein_coding	20.6541	1.2271	3.74627	0.000179486	0.00220882	FDR < 0.10	0.21
ENSG00000186205	MARC1	protein_coding	1439.6	1.22664	6.1539	7.56e-10	9.9911e-08	FDR < 0.10	46.5471
ENSG00000059804	SLC2A3	protein_coding	9659.06	1.21973	6.88304	5.85888e-12	1.30662e-09	FDR < 0.10	165.869
ENSG00000184557	SOCS3	protein_coding	1363.2	1.2036	9.84148	7.4607e-23	1.62173e-19	FDR < 0.10	27.1171
ENSG00000159339	PADI4	protein_coding	4929.78	1.19919	3.2726	0.00106561	0.00876124	FDR < 0.10	172.319
ENSG00000183019	MCEMP1	protein_coding	544.368	1.19485	9.64166	5.33185e-22	9.51269e-19	FDR < 0.10	19.2671
ENSG00000124731	TREM1	protein_coding	6972.55	1.19176	8.96188	3.19178e-19	3.03709e-16	FDR < 0.10	345.554
ENSG00000167680	SEMA6B	protein_coding	21.1812	1.18801	3.14119	0.00168264	0.0125216	FDR < 0.10	0.297857
ENSG00000154188	ANGPT1	protein_coding	132.439	1.18784	4.94939	7.44453e-07	3.04458e-05	FDR < 0.10	2.70429
ENSG00000196411	EPHB4	protein_coding	997.269	1.17769	6.55364	5.61513e-11	1.00181e-08	FDR < 0.10	15.1607
ENSG00000118113	MMP8	protein_coding	108.263	1.17147	3.5494	0.000386111	0.00395902	FDR < 0.10	2.53
ENSG00000182853	VMO1	protein_coding	32.2698	1.16466	3.44056	0.000580515	0.00541625	FDR < 0.10	2.88786
ENSG00000113555	PCDH12	protein_coding	39.5664	1.15177	4.23392	2.29651e-05	0.000477119	FDR < 0.10	0.507857
ENSG00000116096	SPR	protein_coding	26.7004	1.1468	3.66972	0.000242817	0.00277258	FDR < 0.10	1.04
ENSG00000225873	LINC00694	protein_coding	560.663	1.14392	5.90678	3.48849e-09	3.58211e-07	FDR < 0.10	43.8471
ENSG00000134531	EMP1	protein_coding	48.5991	1.14176	4.01689	5.89713e-05	0.000971937	FDR < 0.10	1.29214
ENSG00000182253	SYNM	protein_coding	100.408	1.13986	5.02303	5.08614e-07	2.21324e-05	FDR < 0.10	0.865
ENSG00000100985	MMP9	protein_coding	7835.99	1.13739	2.68615	0.00722808	0.0371503	FDR < 0.10	182.287
ENSG00000148344	PTGES	protein_coding	42.4052	1.13518	4.09755	4.17552e-05	0.000757232	FDR < 0.10	1.34786
ENSG00000181778	TMEM252	protein_coding	46.3059	1.13429	3.40288	0.000666799	0.00605807	FDR < 0.10	2.16929
ENSG00000113070	HBEGF	protein_coding	35.8347	1.12797	3.49472	0.000474565	0.00463618	FDR < 0.10	0.862857
ENSG00000196352	CD55	protein_coding	6172.82	1.11971	9.08141	1.07177e-19	1.27478e-16	FDR < 0.10	162.634
ENSG00000130768	SMPDL3B	protein_coding	34.2453	1.11558	3.83505	0.000125537	0.00172287	FDR < 0.10	1.04929
ENSG00000140450	ARRDC4	protein_coding	389.078	1.11427	8.98458	2.59713e-19	2.64777e-16	FDR < 0.10	5.085
ENSG00000171236	LRG1	protein_coding	4083.9	1.1102	4.17564	2.97152e-05	0.000583202	FDR < 0.10	76.3893
ENSG00000135378	PRRG4	protein_coding	565.791	1.1093	7.95216	1.83293e-15	7.47467e-13	FDR < 0.10	5.355
ENSG00000096006	CRISP3	protein_coding	85.2454	1.10239	3.62964	0.000283816	0.0031378	FDR < 0.10	2.73214
ENSG00000189013	KIR2DL4	protein_coding	27.8744	1.10022	3.14199	0.00167806	0.0125005	FDR < 0.10	1.15214
ENSG00000172967	XKR3	protein_coding	23.0452	1.09865	2.4874	0.0128682	0.0560646	FDR < 0.10	0.756429
ENSG00000137801	THBS1	protein_coding	846.895	1.08928	6.40156	1.53797e-10	2.49449e-08	FDR < 0.10	8.26357
ENSG00000118785	SPP1	protein_coding	88.4485	1.08648	4.31437	1.60058e-05	0.000354736	FDR < 0.10	4.29857
ENSG00000163421	PROK2	protein_coding	3315.86	1.08344	8.12224	4.57646e-16	2.29198e-13	FDR < 0.10	133.676
ENSG00000152766	ANKRD22	protein_coding	63.5351	1.08214	4.1917	2.76878e-05	0.000552711	FDR < 0.10	2.32286
ENSG00000138772	ANXA3	protein_coding	878.03	1.0761	7.39874	1.37482e-13	4.26582e-11	FDR < 0.10	31.87
ENSG00000115828	QPCT	protein_coding	4031.61	1.07041	6.22705	4.75284e-10	6.85226e-08	FDR < 0.10	135.851
ENSG00000229859	PGA3	protein_coding	20.2269	1.06553	2.53067	0.0113845	0.0515029	FDR < 0.10	0.722857
ENSG00000236320	SLFN14	protein_coding	29.8927	1.06415	3.08181	0.00205744	0.0144862	FDR < 0.10	0.556429
ENSG00000140379	BCL2A1	protein_coding	2149.39	1.06244	8.1172	4.77049e-16	2.29198e-13	FDR < 0.10	127.59
ENSG00000075426	FOSL2	protein_coding	7012.25	1.05917	6.75644	1.41419e-11	2.88353e-09	FDR < 0.10	73.5164
ENSG00000171368	TPPP	protein_coding	115.94	1.05651	6.20289	5.54344e-10	7.75701e-08	FDR < 0.10	1.02786
ENSG00000149798	CDC42EP2	protein_coding	2168.62	1.05118	7.78359	7.04973e-15	2.71948e-12	FDR < 0.10	59.3543
ENSG00000260861	RP4-576H24.4	protein_coding	52.8769	1.05021	2.91659	0.00353881	0.0217619	FDR < 0.10	6.30786
ENSG00000283761	RP4-714D9.5	protein_coding	37.6054	1.04326	3.2255	0.00125751	0.0099382	FDR < 0.10	0.589286
ENSG00000113916	BCL6	protein_coding	8818.2	1.03889	5.47603	4.34977e-08	3.0138e-06	FDR < 0.10	167.316
ENSG00000284552	RP11-321E2.5	protein_coding	43.7025	1.03803	3.50106	0.000463413	0.0045553	FDR < 0.10	5.10857
ENSG00000113368	LMNB1	protein_coding	2071.55	1.03318	8.89492	5.84593e-19	5.21493e-16	FDR < 0.10	76.6521
ENSG00000186431	FCAR	protein_coding	1059.15	1.0326	5.44831	5.08515e-08	3.37583e-06	FDR < 0.10	49.79
ENSG00000112303	VNN2	protein_coding	23830.8	1.03239	6.61672	3.67262e-11	7.23833e-09	FDR < 0.10	722.698
ENSG00000102445	RUBCNL	protein_coding	2065.91	1.0293	5.56593	2.60754e-08	2.01175e-06	FDR < 0.10	51.5943
ENSG00000106772	PRUNE2	protein_coding	69.485	1.02911	4.32077	1.55485e-05	0.000346757	FDR < 0.10	1.39143
ENSG00000211445	GPX3	protein_coding	243.737	1.02502	4.92379	8.48819e-07	3.42237e-05	FDR < 0.10	8.65786
ENSG00000069399	BCL3	protein_coding	2991.11	1.02233	6.24635	4.2016e-10	6.11933e-08	FDR < 0.10	100.084
ENSG00000196549	MME	protein_coding	9253.51	1.02209	3.68764	0.000226348	0.00262869	FDR < 0.10	138.96
ENSG00000138411	HECW2	protein_coding	175.348	1.01743	4.78063	1.74744e-06	6.17357e-05	FDR < 0.10	3.58714
ENSG00000187116	LILRA5	protein_coding	3590.53	1.01728	8.25874	1.47216e-16	8.40483e-14	FDR < 0.10	161.138
ENSG00000093134	VNN3	protein_coding	1310.71	1.016	5.21971	1.79203e-07	9.61564e-06	FDR < 0.10	47.4814
ENSG00000257335	MGAM	protein_coding	8894.77	1.01088	3.691	0.000223376	0.00260691	FDR < 0.10	57.5436
ENSG00000132965	ALOX5AP	protein_coding	8028.61	1.01023	5.50288	3.73643e-08	2.69344e-06	FDR < 0.10	550.464
ENSG00000276289	KCNE1B	protein_coding	52.6765	1.00587	4.19899	2.68108e-05	0.000538972	FDR < 0.10	0.923571
ENSG00000122733	PHF24	protein_coding	61.2768	1.00478	3.31904	0.000903267	0.00769691	FDR < 0.10	0.722857
ENSG00000138678	GPAT3	protein_coding	1279.85	0.996596	5.79103	6.99569e-09	6.48373e-07	FDR < 0.10	32.1093
ENSG00000165801	ARHGEF40	protein_coding	3335.91	0.993337	8.5817	9.3485e-18	6.35387e-15	FDR < 0.10	66.3529
ENSG00000135407	AVIL	protein_coding	175.524	0.990818	4.25489	2.09149e-05	0.000442906	FDR < 0.10	5.69071
ENSG00000154529	CNTNAP3B	protein_coding	74.4675	0.988921	3.90903	9.26666e-05	0.00136073	FDR < 0.10	0.827143
ENSG00000163430	FSTL1	protein_coding	55.6941	0.984232	4.46742	7.91703e-06	0.000201785	FDR < 0.10	0.869286
ENSG00000102010	BMX	protein_coding	208.175	0.978017	3.83534	0.000125392	0.00172254	FDR < 0.10	4.465
ENSG00000116741	RGS2	protein_coding	27663.3	0.97728	6.5179	7.12989e-11	1.24104e-08	FDR < 0.10	1198.1
ENSG00000155744	FAM126B	protein_coding	1078.76	0.970183	8.15148	3.59487e-16	1.90035e-13	FDR < 0.10	7.31286
ENSG00000158470	B4GALT5	protein_coding	3439.95	0.969328	7.28299	3.2651e-13	9.51078e-11	FDR < 0.10	38.5407
ENSG00000163235	TGFA	protein_coding	759.57	0.965949	5.54155	2.99804e-08	2.24362e-06	FDR < 0.10	10.7693
ENSG00000059728	MXD1	protein_coding	18829.4	0.965778	5.33136	9.74777e-08	5.72551e-06	FDR < 0.10	255.203
ENSG00000136630	HLX	protein_coding	1771.29	0.965398	5.37875	7.50041e-08	4.69532e-06	FDR < 0.10	55.9064
ENSG00000203814	HIST2H2BF	protein_coding	89.864	0.96497	3.58595	0.000335856	0.0035535	FDR < 0.10	2.95071
ENSG00000078804	TP53INP2	protein_coding	866.695	0.960442	5.39648	6.79607e-08	4.30357e-06	FDR < 0.10	11.2214
ENSG00000144655	CSRNP1	protein_coding	1430.85	0.958062	7.62352	2.4685e-14	8.80821e-12	FDR < 0.10	24.4507
ENSG00000170525	PFKFB3	protein_coding	1829.85	0.957105	6.49866	8.10405e-11	1.3936e-08	FDR < 0.10	26.0936
ENSG00000143409	MINDY1	protein_coding	3070.53	0.955014	6.32409	2.54729e-10	4.03971e-08	FDR < 0.10	70.7186
ENSG00000145491	ROPN1L	protein_coding	297.828	0.951938	5.58404	2.34991e-08	1.85305e-06	FDR < 0.10	16.7
ENSG00000186529	CYP4F3	protein_coding	4151.83	0.951144	2.77777	0.00547333	0.0301844	FDR < 0.10	58.805
ENSG00000123405	NFE2	protein_coding	7530.65	0.950409	5.48469	4.14187e-08	2.92046e-06	FDR < 0.10	241.891
ENSG00000135604	STX11	protein_coding	2815.77	0.94819	7.95632	1.77226e-15	7.43983e-13	FDR < 0.10	81.5414
ENSG00000158373	HIST1H2BD	protein_coding	229.335	0.948046	5.81851	5.93734e-09	5.72592e-07	FDR < 0.10	21.8264
ENSG00000160179	ABCG1	protein_coding	1243.14	0.943329	5.6352	1.74856e-08	1.43432e-06	FDR < 0.10	24.16
ENSG00000254788	CKLF-CMTM1	protein_coding	93.3724	0.938756	3.18405	0.0014523	0.0111445	FDR < 0.10	11.2314
ENSG00000131873	CHSY1	protein_coding	1438.6	0.936575	8.72681	2.61946e-18	1.96776e-15	FDR < 0.10	22.5593
ENSG00000184005	ST6GALNAC3	protein_coding	56.5831	0.934038	4.6559	3.22562e-06	0.000101624	FDR < 0.10	1.77429
ENSG00000112053	SLC26A8	protein_coding	100.15	0.933311	3.07397	0.00211233	0.0147502	FDR < 0.10	2.15071
ENSG00000229314	ORM1	protein_coding	371.68	0.932247	4.48058	7.44415e-06	0.000193183	FDR < 0.10	30.23
ENSG00000136867	SLC31A2	protein_coding	2042.06	0.930563	11.2251	3.06945e-29	2.19051e-25	FDR < 0.10	65.2157
ENSG00000133116	KL	protein_coding	14.5715	0.928088	2.29694	0.0216221	0.0822529	FDR < 0.10	0.165714
ENSG00000181350	LRRC75A	protein_coding	306.405	0.923104	4.04298	5.27769e-05	0.000906589	FDR < 0.10	7.10286
ENSG00000101384	JAG1	protein_coding	94.8861	0.918039	4.40442	1.06068e-05	0.000255297	FDR < 0.10	0.965714
ENSG00000167210	LOXHD1	protein_coding	89.8291	0.916466	4.16518	3.11112e-05	0.00060415	FDR < 0.10	1.42714
ENSG00000011198	ABHD5	protein_coding	2018.21	0.916051	5.6697	1.43048e-08	1.20812e-06	FDR < 0.10	72.7957
ENSG00000204131	NHSL2	protein_coding	3819.03	0.905238	6.61554	3.70208e-11	7.23833e-09	FDR < 0.10	25.9707
ENSG00000260238	PMF1-BGLAP	protein_coding	64.4292	0.903628	3.65844	0.000253751	0.00286988	FDR < 0.10	4.03071
ENSG00000067798	NAV3	protein_coding	34.8723	0.902718	2.64518	0.00816479	0.0406049	FDR < 0.10	0.397857
ENSG00000136383	ALPK3	protein_coding	26.3911	0.902182	2.90535	0.00366839	0.0223565	FDR < 0.10	0.16
ENSG00000151726	ACSL1	protein_coding	15713	0.900534	3.40532	0.00066086	0.00601176	FDR < 0.10	234.766
ENSG00000139132	FGD4	protein_coding	566.657	0.898146	6.95419	3.54595e-12	8.29695e-10	FDR < 0.10	5.07714
ENSG00000274070	GATSL2	protein_coding	70.4724	0.897345	3.51709	0.000436307	0.00435787	FDR < 0.10	3.41857
ENSG00000089505	CMTM1	protein_coding	142.001	0.895546	3.74398	0.000181125	0.00222096	FDR < 0.10	10.6264
ENSG00000148926	ADM	protein_coding	1353.76	0.894672	4.77545	1.79302e-06	6.30338e-05	FDR < 0.10	59.3121
ENSG00000180815	MAP3K15	protein_coding	20.855	0.892229	2.62406	0.00868874	0.0425167	FDR < 0.10	0.382143
ENSG00000204389	HSPA1A	protein_coding	14022.8	0.889891	5.40597	6.44578e-08	4.12559e-06	FDR < 0.10	313.229
ENSG00000165030	NFIL3	protein_coding	1913.41	0.889402	6.03157	1.62372e-09	1.88417e-07	FDR < 0.10	50.7093
ENSG00000156675	RAB11FIP1	protein_coding	12543.6	0.888388	6.7682	1.30395e-11	2.69729e-09	FDR < 0.10	109.281
ENSG00000196083	IL1RAP	protein_coding	1622.03	0.887589	8.11203	4.97802e-16	2.29198e-13	FDR < 0.10	25.6157
ENSG00000115507	OTX1	protein_coding	111.467	0.886962	3.75436	0.000173785	0.00216443	FDR < 0.10	2.10357
ENSG00000181016	LSMEM1	protein_coding	79.7205	0.882763	3.59081	0.000329648	0.00349819	FDR < 0.10	3.62357
ENSG00000115594	IL1R1	protein_coding	413.62	0.881282	4.32111	1.55248e-05	0.000346757	FDR < 0.10	4.855
ENSG00000087074	PPP1R15A	protein_coding	4475.31	0.876883	6.94718	3.72667e-12	8.57915e-10	FDR < 0.10	103.666
ENSG00000205670	SMIM11A	protein_coding	67.9775	0.875181	2.4987	0.0124648	0.0548786	FDR < 0.10	4.42071
ENSG00000260007	RP11-315D16.2	protein_coding	123.458	0.871696	3.56614	0.000362272	0.00376873	FDR < 0.10	2.28571
ENSG00000171049	FPR2	protein_coding	8748.86	0.868675	5.13918	2.75936e-07	1.37153e-05	FDR < 0.10	269.061
ENSG00000103569	AQP9	protein_coding	21179.9	0.866024	5.47389	4.4026e-08	3.03567e-06	FDR < 0.10	381.845
ENSG00000132970	WASF3	protein_coding	39.5928	0.866005	3.48345	0.000494991	0.00479308	FDR < 0.10	0.457143
ENSG00000243660	ZNF487	protein_coding	229.467	0.865628	6.25537	3.96571e-10	5.83532e-08	FDR < 0.10	10.56
ENSG00000119986	AVPI1	protein_coding	45.9555	0.862365	3.65135	0.000260867	0.00293178	FDR < 0.10	1.83714
ENSG00000157551	KCNJ15	protein_coding	5543.18	0.862175	4.91363	8.94075e-07	3.56456e-05	FDR < 0.10	121.186
ENSG00000136868	SLC31A1	protein_coding	545.418	0.861734	9.83504	7.95356e-23	1.62173e-19	FDR < 0.10	6.29643
ENSG00000104450	SPAG1	protein_coding	122.2	0.859429	5.5413	3.00239e-08	2.24362e-06	FDR < 0.10	2.36857
ENSG00000167536	DHRS13	protein_coding	864.463	0.858324	7.06105	1.65248e-12	4.13787e-10	FDR < 0.10	26.9814
ENSG00000160588	MPZL3	protein_coding	2625.97	0.854857	5.51865	3.41607e-08	2.51877e-06	FDR < 0.10	39.305
ENSG00000057704	TMCC3	protein_coding	2592.24	0.854562	5.47078	4.48059e-08	3.07459e-06	FDR < 0.10	27.1
ENSG00000173535	TNFRSF10C	protein_coding	14734.7	0.853555	5.23266	1.67085e-07	9.10229e-06	FDR < 0.10	518.68
ENSG00000106780	MEGF9	protein_coding	10560.2	0.851837	5.54734	2.90052e-08	2.20208e-06	FDR < 0.10	87.5271
ENSG00000103196	CRISPLD2	protein_coding	4340.12	0.851582	2.54375	0.0109669	0.0502024	FDR < 0.10	53.6793
ENSG00000158089	GALNT14	protein_coding	101.791	0.850672	3.57008	0.000356875	0.00372345	FDR < 0.10	3.14857
ENSG00000214274	ANG	protein_coding	57.1352	0.850144	4.00394	6.22954e-05	0.00101149	FDR < 0.10	3.52643
ENSG00000079385	CEACAM1	protein_coding	818.066	0.849683	5.17909	2.2297e-07	1.16573e-05	FDR < 0.10	15.0614
ENSG00000170837	GPR27	protein_coding	939.235	0.849412	5.37896	7.49187e-08	4.69532e-06	FDR < 0.10	20.8821
ENSG00000197208	SLC22A4	protein_coding	468.953	0.845685	5.57758	2.43886e-08	1.90218e-06	FDR < 0.10	13.5021
ENSG00000162069	BICDL2	protein_coding	48.4322	0.844568	2.52319	0.0116295	0.0521976	FDR < 0.10	1.08929
ENSG00000173281	PPP1R3B	protein_coding	3356.68	0.844441	5.06703	4.04079e-07	1.85448e-05	FDR < 0.10	31.8057
ENSG00000188056	TREML4	protein_coding	153.974	0.843839	3.12547	0.00177523	0.0130071	FDR < 0.10	4.59214
ENSG00000228278	ORM2	protein_coding	33.0641	0.841884	2.35324	0.0186107	0.0732773	FDR < 0.10	2.85429
ENSG00000265118	CTD-2370N5.3	protein_coding	247.938	0.838031	3.23684	0.0012086	0.0096371	FDR < 0.10	15.8
ENSG00000180061	TMEM150B	protein_coding	103.385	0.837272	4.8082	1.52298e-06	5.60245e-05	FDR < 0.10	8.87214
ENSG00000161040	FBXL13	protein_coding	81.9802	0.835786	4.31646	1.58549e-05	0.000352486	FDR < 0.10	3.19286
ENSG00000101236	RNF24	protein_coding	6533.5	0.835637	4.44446	8.81115e-06	0.000219479	FDR < 0.10	51.0793
ENSG00000112195	TREML2	protein_coding	3221.86	0.835114	6.07948	1.20569e-09	1.50955e-07	FDR < 0.10	52.3107
ENSG00000110203	FOLR3	protein_coding	2475.07	0.834631	5.9394	2.86061e-09	3.0667e-07	FDR < 0.10	196.522
ENSG00000197632	SERPINB2	protein_coding	60.2234	0.833416	4.14963	3.33006e-05	0.000642297	FDR < 0.10	2.04714
ENSG00000189067	LITAF	protein_coding	33911	0.832808	6.4122	1.4343e-10	2.35308e-08	FDR < 0.10	933.262
ENSG00000180316	PNPLA1	protein_coding	159.676	0.830946	3.16596	0.0015457	0.011735	FDR < 0.10	4.61714
ENSG00000146592	CREB5	protein_coding	3059.02	0.829781	4.90116	9.52702e-07	3.73569e-05	FDR < 0.10	38.0843
ENSG00000139112	GABARAPL1	protein_coding	2336.28	0.826588	5.86433	4.50959e-09	4.50108e-07	FDR < 0.10	69.1443
ENSG00000188313	PLSCR1	protein_coding	886.216	0.825873	8.30557	9.9339e-17	5.90777e-14	FDR < 0.10	47.2614
ENSG00000163625	WDFY3	protein_coding	1899.12	0.82349	4.93281	8.10551e-07	3.28664e-05	FDR < 0.10	17.42
ENSG00000175928	LRRN1	protein_coding	103.654	0.823443	3.05779	0.00222979	0.0153673	FDR < 0.10	1.45571
ENSG00000165626	BEND7	protein_coding	74.0032	0.823071	2.71517	0.00662416	0.0347215	FDR < 0.10	2.79357
ENSG00000163993	S100P	protein_coding	3496.67	0.818174	4.58191	4.60743e-06	0.000135592	FDR < 0.10	513.764
ENSG00000115919	KYNU	protein_coding	475.426	0.817754	4.81872	1.44484e-06	5.37037e-05	FDR < 0.10	17.2014
ENSG00000121552	CSTA	protein_coding	1701.71	0.817242	7.3215	2.45215e-13	7.29158e-11	FDR < 0.10	147.856
ENSG00000165029	ABCA1	protein_coding	692.677	0.816143	5.6903	1.26816e-08	1.10368e-06	FDR < 0.10	3.50286
ENSG00000162512	SDC3	protein_coding	87.6318	0.813454	3.82624	0.000130116	0.00176321	FDR < 0.10	1.12357
ENSG00000123146	ADGRE5	protein_coding	27435.2	0.81264	7.48276	7.27795e-14	2.41577e-11	FDR < 0.10	598.931
ENSG00000170458	CD14	protein_coding	10044.3	0.81121	8.08176	6.38401e-16	2.84747e-13	FDR < 0.10	348.814
ENSG00000162747	FCGR3B	protein_coding	105210	0.811165	2.91105	0.00360214	0.0220574	FDR < 0.10	3131.4
ENSG00000166130	IKBIP	protein_coding	1330.02	0.810539	6.80523	1.00891e-11	2.14928e-09	FDR < 0.10	33.7321
ENSG00000108582	CPD	protein_coding	4141.81	0.808025	5.24528	1.56042e-07	8.59919e-06	FDR < 0.10	33.7971
ENSG00000150048	CLEC1A	protein_coding	25.7023	0.80714	2.76626	0.00567038	0.0309733	FDR < 0.10	0.93
ENSG00000127946	HIP1	protein_coding	2118.03	0.805505	4.58882	4.45753e-06	0.000132516	FDR < 0.10	13.9371
ENSG00000113303	BTNL8	protein_coding	892.655	0.8048	4.9665	6.81716e-07	2.82853e-05	FDR < 0.10	33.3543
ENSG00000135046	ANXA1	protein_coding	8010.25	0.804553	7.36009	1.83784e-13	5.58116e-11	FDR < 0.10	312.199
ENSG00000142405	NLRP12	protein_coding	2940.57	0.80388	4.95631	7.18455e-07	2.95519e-05	FDR < 0.10	41.875
ENSG00000122862	SRGN	protein_coding	40210.2	0.801351	8.11525	4.84789e-16	2.29198e-13	FDR < 0.10	1991.04
ENSG00000106714	CNTNAP3	protein_coding	693.736	0.800573	5.14134	2.7278e-07	1.36133e-05	FDR < 0.10	10.42
ENSG00000026652	AGPAT4	protein_coding	161.658	0.800241	5.6018	2.12133e-08	1.69537e-06	FDR < 0.10	1.68786
ENSG00000182782	HCAR2	protein_coding	2562.11	0.799083	5.28033	1.28949e-07	7.24601e-06	FDR < 0.10	69.0314
ENSG00000127951	FGL2	protein_coding	15093.9	0.798712	9.24969	2.25152e-20	2.92144e-17	FDR < 0.10	282.772
ENSG00000137460	FHDC1	protein_coding	76.755	0.798591	2.83212	0.00462409	0.0264883	FDR < 0.10	0.615714
ENSG00000183621	ZNF438	protein_coding	521.597	0.798091	7.09766	1.26889e-12	3.35385e-10	FDR < 0.10	9.63714
ENSG00000180953	ST20	protein_coding	260.608	0.797756	3.60215	0.000315592	0.0034051	FDR < 0.10	29.8721
ENSG00000158825	CDA	protein_coding	4011.59	0.797737	4.41022	1.03268e-05	0.000250244	FDR < 0.10	265.08
ENSG00000175274	TP53I11	protein_coding	2608.76	0.795931	2.96559	0.00302102	0.0192663	FDR < 0.10	51.7307
ENSG00000166928	MS4A14	protein_coding	101.812	0.795611	3.5256	0.000422531	0.00425002	FDR < 0.10	2.27357
ENSG00000176788	BASP1	protein_coding	11556.2	0.795208	5.44897	5.06631e-08	3.37583e-06	FDR < 0.10	342.89
ENSG00000143878	RHOB	protein_coding	4266.27	0.794282	5.89234	3.80769e-09	3.82726e-07	FDR < 0.10	98.4757
ENSG00000188895	MSL1	protein_coding	10409.2	0.793917	5.28281	1.27216e-07	7.17687e-06	FDR < 0.10	181.489
ENSG00000123838	C4BPA	protein_coding	328.296	0.793309	3.74371	0.00018132	0.00222144	FDR < 0.10	9.11429
ENSG00000172771	EFCAB12	protein_coding	33.5054	0.792815	2.61158	0.00901255	0.0435612	FDR < 0.10	0.663571
ENSG00000230257	NFE4	protein_coding	423.039	0.787644	4.73336	2.2083e-06	7.48672e-05	FDR < 0.10	24.5843
ENSG00000198734	F5	protein_coding	1399.68	0.787521	4.53518	5.75541e-06	0.000160992	FDR < 0.10	20.1929
ENSG00000198604	BAZ1A	protein_coding	3401.24	0.780305	8.61712	6.86591e-18	4.89986e-15	FDR < 0.10	41.6021
ENSG00000180871	CXCR2	protein_coding	45592.9	0.780023	4.8532	1.21485e-06	4.5751e-05	FDR < 0.10	1014.34
ENSG00000131759	RARA	protein_coding	6686.9	0.779124	5.17248	2.31002e-07	1.1946e-05	FDR < 0.10	153.203
ENSG00000163221	S100A12	protein_coding	5519.41	0.77677	4.87755	1.07409e-06	4.1211e-05	FDR < 0.10	785.56
ENSG00000146859	TMEM140	protein_coding	4628.94	0.775616	5.27044	1.36094e-07	7.58776e-06	FDR < 0.10	128.853
ENSG00000131480	AOC2	protein_coding	334.04	0.77487	3.65555	0.000256631	0.00289328	FDR < 0.10	6.82786
ENSG00000116729	WLS	protein_coding	2207.25	0.774609	5.11235	3.18181e-07	1.52909e-05	FDR < 0.10	60.67
ENSG00000100504	PYGL	protein_coding	8200.39	0.774057	4.20757	2.58132e-05	0.000522836	FDR < 0.10	170.609
ENSG00000158769	F11R	protein_coding	4624.71	0.7717	5.35629	8.49467e-08	5.18138e-06	FDR < 0.10	72.015
ENSG00000105835	NAMPT	protein_coding	47883.8	0.77094	5.12473	2.97958e-07	1.44652e-05	FDR < 0.10	1302.52
ENSG00000213085	CFAP45	protein_coding	132.138	0.770751	3.78106	0.000156164	0.00201713	FDR < 0.10	4.29857
ENSG00000129682	FGF13	protein_coding	30.0992	0.770686	2.31022	0.0208761	0.0800978	FDR < 0.10	1.03214
ENSG00000186409	CCDC30	protein_coding	42.2934	0.770292	2.82131	0.00478284	0.0271541	FDR < 0.10	0.827857
ENSG00000072952	MRVI1	protein_coding	1897.8	0.769306	5.22967	1.69815e-07	9.18092e-06	FDR < 0.10	17.3279
ENSG00000100644	HIF1A	protein_coding	3049.62	0.768224	5.32724	9.97147e-08	5.8329e-06	FDR < 0.10	66.9814
ENSG00000112096	SOD2	protein_coding	44359.7	0.762831	6.56473	5.21261e-11	9.41767e-09	FDR < 0.10	1289.14
ENSG00000112299	VNN1	protein_coding	544.73	0.762252	5.5539	2.79365e-08	2.13228e-06	FDR < 0.10	9.42
ENSG00000111837	MAK	protein_coding	231.758	0.760919	5.30526	1.12515e-07	6.44949e-06	FDR < 0.10	3.25286
ENSG00000117115	PADI2	protein_coding	6988.63	0.759562	2.64561	0.00815443	0.0405958	FDR < 0.10	86.4057
ENSG00000165046	LETM2	protein_coding	246.467	0.757936	4.10441	4.0535e-05	0.000741739	FDR < 0.10	9.24
ENSG00000135636	DYSF	protein_coding	8598.3	0.757789	2.59991	0.0093248	0.0446381	FDR < 0.10	99.1736
ENSG00000110400	NECTIN1	protein_coding	620.861	0.756608	4.11688	3.8404e-05	0.000710026	FDR < 0.10	6.46286
ENSG00000008438	PGLYRP1	protein_coding	1277.05	0.756371	3.88636	0.00010176	0.00145712	FDR < 0.10	116.491
ENSG00000163464	CXCR1	protein_coding	32701.2	0.75519	4.74384	2.09707e-06	7.19507e-05	FDR < 0.10	716.971
ENSG00000197081	IGF2R	protein_coding	24538.1	0.755184	4.56152	5.07854e-06	0.000146436	FDR < 0.10	125.945
ENSG00000087903	RFX2	protein_coding	702.058	0.752141	5.92803	3.06584e-09	3.21755e-07	FDR < 0.10	14.4014
ENSG00000188158	NHS	protein_coding	225.245	0.752104	3.91478	9.04849e-05	0.00133556	FDR < 0.10	1.69
ENSG00000003402	CFLAR	protein_coding	11245.1	0.751836	6.08208	1.1863e-09	1.49842e-07	FDR < 0.10	177.195
ENSG00000168903	BTNL3	protein_coding	286.359	0.750737	3.40151	0.00067015	0.00607305	FDR < 0.10	6.375
ENSG00000077157	PPP1R12B	protein_coding	1340.63	0.750609	2.63469	0.00842144	0.0414766	FDR < 0.10	5.77
ENSG00000183762	KREMEN1	protein_coding	1184.75	0.750522	4.25973	2.04671e-05	0.00043536	FDR < 0.10	11.4793
ENSG00000159588	CCDC17	protein_coding	73.5341	0.750473	2.42535	0.0152935	0.0636983	FDR < 0.10	1.76
ENSG00000143079	CTTNBP2NL	protein_coding	52.8401	0.748896	3.11301	0.00185191	0.0134379	FDR < 0.10	0.669286
ENSG00000155090	KLF10	protein_coding	897.043	0.747584	7.87865	3.30945e-15	1.3121e-12	FDR < 0.10	15.6721
ENSG00000115590	IL1R2	protein_coding	2253.09	0.747322	4.32087	1.55415e-05	0.000346757	FDR < 0.10	106.084
ENSG00000198682	PAPSS2	protein_coding	121.872	0.747037	4.41115	1.02824e-05	0.000249593	FDR < 0.10	2.21286
ENSG00000103313	MEFV	protein_coding	5798.94	0.746413	4.60372	4.15014e-06	0.000123923	FDR < 0.10	91.7486
ENSG00000258818	RNASE4	protein_coding	79.9038	0.746399	3.46409	0.000532032	0.00506247	FDR < 0.10	3.57429
ENSG00000105514	RAB3D	protein_coding	6289.99	0.746351	4.57617	4.73571e-06	0.00013851	FDR < 0.10	78.7979
ENSG00000204388	HSPA1B	protein_coding	1275.17	0.745063	5.06965	3.98546e-07	1.83498e-05	FDR < 0.10	27.6621
ENSG00000282988	HIST1H3D	protein_coding	143.323	0.744867	3.78335	0.000154732	0.0020059	FDR < 0.10	7.15929
ENSG00000162772	ATF3	protein_coding	48.7501	0.743998	2.8086	0.00497572	0.027949	FDR < 0.10	1.59357
ENSG00000157800	SLC37A3	protein_coding	397.029	0.743948	4.18356	2.86978e-05	0.000567318	FDR < 0.10	8.92214
ENSG00000203710	CR1	protein_coding	3821.71	0.743729	4.26134	2.03209e-05	0.000432896	FDR < 0.10	28.2786
ENSG00000259332	ST20-MTHFS	protein_coding	135.838	0.7435	3.18489	0.00144811	0.0111215	FDR < 0.10	11.6643
ENSG00000035664	DAPK2	protein_coding	1187.76	0.742993	2.4633	0.0137665	0.0590411	FDR < 0.10	31.0564
ENSG00000165115	KIF27	protein_coding	207.172	0.737177	3.10975	0.00187246	0.0135457	FDR < 0.10	2.75786
ENSG00000239732	TLR9	protein_coding	181.983	0.735424	2.78739	0.00531347	0.0294635	FDR < 0.10	2.495
ENSG00000166523	CLEC4E	protein_coding	3624.06	0.735206	4.32897	1.49811e-05	0.00033913	FDR < 0.10	187.854
ENSG00000139832	RAB20	protein_coding	266.634	0.735046	4.39996	1.08268e-05	0.000259281	FDR < 0.10	10.0493
ENSG00000163297	ANTXR2	protein_coding	3207.49	0.734016	6.3123	2.74917e-10	4.2651e-08	FDR < 0.10	61.7414
ENSG00000128594	LRRC4	protein_coding	1929.91	0.733289	3.678	0.000235074	0.00271019	FDR < 0.10	31.7521
ENSG00000215114	UBXN2B	protein_coding	1907.28	0.73274	5.17805	2.24219e-07	1.16798e-05	FDR < 0.10	33.3879
ENSG00000067082	KLF6	protein_coding	9723.81	0.732213	6.88599	5.73885e-12	1.30017e-09	FDR < 0.10	135.489
ENSG00000149269	PAK1	protein_coding	7590.21	0.730594	4.96681	6.80643e-07	2.82853e-05	FDR < 0.10	172.839
ENSG00000148450	MSRB2	protein_coding	596.669	0.730535	6.36809	1.91394e-10	3.0694e-08	FDR < 0.10	28.4171
ENSG00000073756	PTGS2	protein_coding	893.415	0.730013	5.51307	3.52632e-08	2.56792e-06	FDR < 0.10	13.5271
ENSG00000184602	SNN	protein_coding	7401.84	0.728796	5.84863	4.95648e-09	4.90847e-07	FDR < 0.10	120.069
ENSG00000169891	REPS2	protein_coding	1336.34	0.728679	4.08132	4.47814e-05	0.000791045	FDR < 0.10	23.2871
ENSG00000123358	NR4A1	protein_coding	256.716	0.728292	5.78897	7.08186e-09	6.52126e-07	FDR < 0.10	6.56357
ENSG00000135074	ADAM19	protein_coding	4194.92	0.728163	4.35415	1.33581e-05	0.000308014	FDR < 0.10	43.1793
ENSG00000163823	CCR1	protein_coding	2776.16	0.727353	7.72574	1.11209e-14	4.17706e-12	FDR < 0.10	55.1743
ENSG00000136869	TLR4	protein_coding	4808.92	0.726356	5.02987	4.90804e-07	2.15546e-05	FDR < 0.10	56.2643
ENSG00000117616	RSRP1	protein_coding	2939.23	0.726038	2.72015	0.00652519	0.0343288	FDR < 0.10	109.271
ENSG00000197405	C5AR1	protein_coding	17102.2	0.724884	4.73827	2.15552e-06	7.34265e-05	FDR < 0.10	416.406
ENSG00000166046	TCP11L2	protein_coding	1051.5	0.723934	5.49444	3.91955e-08	2.78327e-06	FDR < 0.10	32.7971
ENSG00000073464	CLCN4	protein_coding	278.265	0.723827	3.52403	0.000425043	0.00426328	FDR < 0.10	2.79286
ENSG00000144802	NFKBIZ	protein_coding	1359.76	0.719887	6.0644	1.32449e-09	1.60495e-07	FDR < 0.10	25.0079
ENSG00000135678	CPM	protein_coding	147.679	0.719326	4.90674	9.26032e-07	3.65856e-05	FDR < 0.10	3.15643
ENSG00000152061	RABGAP1L	protein_coding	2116.02	0.719105	7.55839	4.08093e-14	1.42066e-11	FDR < 0.10	38.3557
ENSG00000108244	KRT23	protein_coding	3481.97	0.718897	5.33671	9.46507e-08	5.62896e-06	FDR < 0.10	100.796
ENSG00000103381	CPPED1	protein_coding	14038	0.717779	5.91805	3.25777e-09	3.39403e-07	FDR < 0.10	233.264
ENSG00000161533	ACOX1	protein_coding	3333.17	0.717758	4.69124	2.71551e-06	8.70697e-05	FDR < 0.10	50.5271
ENSG00000148572	NRBF2	protein_coding	3252.76	0.716753	5.19727	2.02237e-07	1.06514e-05	FDR < 0.10	98.37
ENSG00000140932	CMTM2	protein_coding	4320.9	0.714817	4.50416	6.66351e-06	0.000179536	FDR < 0.10	571.21
ENSG00000173334	TRIB1	protein_coding	1087.64	0.713793	4.83713	1.31729e-06	4.90904e-05	FDR < 0.10	16.8386
ENSG00000255398	HCAR3	protein_coding	3270.86	0.713647	4.9408	7.78029e-07	3.16376e-05	FDR < 0.10	84.5057
ENSG00000120868	APAF1	protein_coding	3022.57	0.713539	5.11353	3.16194e-07	1.52468e-05	FDR < 0.10	29.3464
ENSG00000166579	NDEL1	protein_coding	4398.99	0.713468	4.9707	6.67123e-07	2.79233e-05	FDR < 0.10	134.859
ENSG00000171051	FPR1	protein_coding	40857.6	0.713435	4.58844	4.4658e-06	0.000132516	FDR < 0.10	1359.51
ENSG00000165175	MID1IP1	protein_coding	3716.35	0.712947	6.20325	5.53105e-10	7.75701e-08	FDR < 0.10	95.5371
ENSG00000140332	TLE3	protein_coding	9401.65	0.711874	4.7198	2.36076e-06	7.90967e-05	FDR < 0.10	184.086
ENSG00000182541	LIMK2	protein_coding	5068.14	0.711455	5.00486	5.59012e-07	2.41781e-05	FDR < 0.10	85.3293
ENSG00000127954	STEAP4	protein_coding	6206.27	0.711398	4.23794	2.25581e-05	0.000470718	FDR < 0.10	52.0243
ENSG00000120594	PLXDC2	protein_coding	2075.05	0.709779	5.34638	8.97329e-08	5.42694e-06	FDR < 0.10	28.595
ENSG00000134827	TCN1	protein_coding	188.656	0.708909	4.34844	1.37112e-05	0.000315136	FDR < 0.10	7.23214
ENSG00000164823	OSGIN2	protein_coding	996.395	0.708134	7.64243	2.13154e-14	7.80089e-12	FDR < 0.10	14.9557
ENSG00000075420	FNDC3B	protein_coding	1309.31	0.708101	5.10261	3.34996e-07	1.57283e-05	FDR < 0.10	15.7936
ENSG00000176845	METRNL	protein_coding	1621.95	0.707559	5.77852	7.53587e-09	6.89484e-07	FDR < 0.10	88.515
ENSG00000069974	RAB27A	protein_coding	3109.04	0.705969	7.4615	8.55411e-14	2.77484e-11	FDR < 0.10	110.589
ENSG00000163659	TIPARP	protein_coding	704.381	0.704099	6.79396	1.09098e-11	2.28993e-09	FDR < 0.10	12.5771
ENSG00000116017	ARID3A	protein_coding	2228.65	0.703514	4.02402	5.72132e-05	0.00095621	FDR < 0.10	28.4707
ENSG00000164691	TAGAP	protein_coding	14599.1	0.702848	7.50992	5.91646e-14	2.01061e-11	FDR < 0.10	241.198
ENSG00000162614	NEXN	protein_coding	83.5497	0.702791	3.99276	6.53091e-05	0.00104779	FDR < 0.10	1.82214
ENSG00000136026	CKAP4	protein_coding	2783.1	0.701957	5.1363	2.80202e-07	1.37908e-05	FDR < 0.10	48.5986
ENSG00000120318	ARAP3	protein_coding	3092.44	0.700577	2.32213	0.0202261	0.0782775	FDR < 0.10	39.5329
ENSG00000198673	FAM19A2	protein_coding	82.2006	0.700153	3.37503	0.000738072	0.00655538	FDR < 0.10	2.48143
ENSG00000125170	DOK4	protein_coding	164.205	0.697701	4.12574	3.69548e-05	0.000691291	FDR < 0.10	3.52214
ENSG00000070614	NDST1	protein_coding	3100.09	0.695474	3.68413	0.000229487	0.0026565	FDR < 0.10	22.6443
ENSG00000136371	MTHFS	protein_coding	1109.95	0.69462	5.68103	1.33885e-08	1.15117e-06	FDR < 0.10	88.4057
ENSG00000258227	CLEC5A	protein_coding	113.441	0.693579	2.99982	0.00270141	0.0176463	FDR < 0.10	2.31857
ENSG00000198225	FKBP1C	protein_coding	40.2988	0.693464	2.95394	0.00313745	0.0198233	FDR < 0.10	1.47214
ENSG00000160789	LMNA	protein_coding	696.624	0.693461	6.74781	1.50098e-11	3.0174e-09	FDR < 0.10	16.9843
ENSG00000133318	RTN3	protein_coding	10031.1	0.692123	4.64148	3.45923e-06	0.00010618	FDR < 0.10	222.763
ENSG00000181826	RELL1	protein_coding	356.514	0.691712	4.77363	1.80937e-06	6.33671e-05	FDR < 0.10	15.4443
ENSG00000125780	TGM3	protein_coding	328.068	0.68998	2.93687	0.00331546	0.0206464	FDR < 0.10	6.75214
ENSG00000143384	MCL1	protein_coding	36550.6	0.689733	6.14998	7.74934e-10	1.01474e-07	FDR < 0.10	544.751
ENSG00000181982	CCDC149	protein_coding	196.026	0.689595	4.46268	8.09407e-06	0.000205563	FDR < 0.10	3.73357
ENSG00000113742	CPEB4	protein_coding	1075.33	0.689001	5.56233	2.66197e-08	2.0427e-06	FDR < 0.10	15.5943
ENSG00000164023	SGMS2	protein_coding	208.017	0.68898	3.46386	0.000532477	0.00506332	FDR < 0.10	3.97786
ENSG00000204020	LIPN	protein_coding	117.317	0.687914	3.75403	0.000174016	0.00216541	FDR < 0.10	5.87571
ENSG00000084110	HAL	protein_coding	1881.64	0.687706	3.84768	0.000119242	0.00165558	FDR < 0.10	36.1871
ENSG00000135821	GLUL	protein_coding	21254.6	0.687653	5.26748	1.38308e-07	7.68122e-06	FDR < 0.10	739.54
ENSG00000248099	INSL3	protein_coding	29.7881	0.686552	2.2668	0.0234026	0.0870764	FDR < 0.10	2.49571
ENSG00000142046	TMEM91	protein_coding	1212.69	0.68642	3.45443	0.000551452	0.0052125	FDR < 0.10	74.5057
ENSG00000170921	TANC2	protein_coding	391.378	0.686016	4.56073	5.09759e-06	0.000146473	FDR < 0.10	2.48786
ENSG00000136999	NOV	protein_coding	826.821	0.685082	3.56327	0.000366258	0.00380189	FDR < 0.10	18.6643
ENSG00000120696	KBTBD7	protein_coding	587.493	0.68504	6.09926	1.06563e-09	1.37024e-07	FDR < 0.10	6.59143
ENSG00000135365	PHF21A	protein_coding	2856.72	0.683881	5.82639	5.66382e-09	5.4993e-07	FDR < 0.10	50.1321
ENSG00000165682	CLEC1B	protein_coding	75.2465	0.682375	3.30031	0.000965781	0.00814211	FDR < 0.10	4.87429
ENSG00000258677	RP11-463D19.2	protein_coding	55.8941	0.682247	2.23598	0.025353	0.0922651	FDR < 0.10	4.64286
ENSG00000071054	MAP4K4	protein_coding	5905.05	0.681372	5.10353	3.33369e-07	1.57035e-05	FDR < 0.10	61.5571
ENSG00000161638	ITGA5	protein_coding	7415.7	0.681142	5.02433	5.05205e-07	2.20513e-05	FDR < 0.10	112.474
ENSG00000073150	PANX2	protein_coding	1305.43	0.680459	3.45578	0.000548709	0.00519001	FDR < 0.10	23.8543
ENSG00000132510	KDM6B	protein_coding	10167.7	0.680002	3.93822	8.20869e-05	0.00124245	FDR < 0.10	85.0236
ENSG00000138735	PDE5A	protein_coding	123.05	0.679793	4.16544	3.1075e-05	0.00060415	FDR < 0.10	1.55143
ENSG00000095794	CREM	protein_coding	186.156	0.679634	4.22016	2.44124e-05	0.000502354	FDR < 0.10	12.0521
ENSG00000188026	RILPL1	protein_coding	74.2425	0.678383	3.256	0.00112993	0.00913741	FDR < 0.10	2.09357
ENSG00000100365	NCF4	protein_coding	8755.55	0.677695	3.92548	8.65555e-05	0.00129362	FDR < 0.10	346.11
ENSG00000131355	ADGRE3	protein_coding	4607.66	0.676356	4.09976	4.13578e-05	0.000751018	FDR < 0.10	116.9
ENSG00000141526	SLC16A3	protein_coding	9209.43	0.676011	4.13673	3.52296e-05	0.00066955	FDR < 0.10	281.179
ENSG00000164047	CAMP	protein_coding	530.045	0.675256	3.89847	9.6803e-05	0.00140414	FDR < 0.10	46.625
ENSG00000155099	TMEM55A	protein_coding	1431.37	0.674246	4.6006	4.21276e-06	0.00012553	FDR < 0.10	88.7414
ENSG00000143546	S100A8	protein_coding	66334.3	0.672629	5.16901	2.35331e-07	1.2039e-05	FDR < 0.10	9296.33
ENSG00000174007	CEP19	protein_coding	1213.15	0.67256	4.90048	9.56025e-07	3.73845e-05	FDR < 0.10	31.7436
ENSG00000143815	LBR	protein_coding	5563.29	0.671432	4.88355	1.04193e-06	4.03023e-05	FDR < 0.10	86.1921
ENSG00000137312	FLOT1	protein_coding	6942.42	0.671388	5.69113	1.262e-08	1.10368e-06	FDR < 0.10	218.221
ENSG00000166900	STX3	protein_coding	4583.93	0.671348	4.21095	2.54298e-05	0.000517774	FDR < 0.10	90.6679
ENSG00000085514	PILRA	protein_coding	9898.89	0.670682	4.52846	5.94146e-06	0.000164733	FDR < 0.10	483.658
ENSG00000105501	SIGLEC5	protein_coding	3140.44	0.670237	3.47602	0.000508914	0.00490712	FDR < 0.10	73.5414
ENSG00000111261	MANSC1	protein_coding	1566.71	0.669542	2.3889	0.016899	0.0684799	FDR < 0.10	43.8479
ENSG00000109743	BST1	protein_coding	2898.03	0.669152	4.40972	1.03503e-05	0.000250389	FDR < 0.10	138.768
ENSG00000175538	KCNE3	protein_coding	3412.74	0.668598	5.47636	4.34158e-08	3.0138e-06	FDR < 0.10	88.8607
ENSG00000115271	GCA	protein_coding	9489.35	0.667659	5.48419	4.15367e-08	2.92046e-06	FDR < 0.10	545.102
ENSG00000158156	XKR8	protein_coding	2603.89	0.667266	4.80648	1.53612e-06	5.6218e-05	FDR < 0.10	56.2371
ENSG00000197579	TOPORS	protein_coding	1363.39	0.666761	4.84458	1.26881e-06	4.76572e-05	FDR < 0.10	18.8393
ENSG00000182022	CHST15	protein_coding	6628.2	0.666576	3.90528	9.41153e-05	0.00137634	FDR < 0.10	74.1557
ENSG00000129467	ADCY4	protein_coding	155.106	0.666309	2.31923	0.0203825	0.0786696	FDR < 0.10	4.06429
ENSG00000244482	LILRA6	protein_coding	2153.31	0.665827	3.80311	0.000142891	0.00188144	FDR < 0.10	64.2279
ENSG00000144228	SPOPL	protein_coding	1302.63	0.665444	5.58811	2.29548e-08	1.82019e-06	FDR < 0.10	19.725
ENSG00000146425	DYNLT1	protein_coding	1628.84	0.665112	6.11977	9.37096e-10	1.21593e-07	FDR < 0.10	142.939
ENSG00000116679	IVNS1ABP	protein_coding	4538.03	0.663947	5.33385	9.61521e-08	5.67099e-06	FDR < 0.10	76.735
ENSG00000073737	DHRS9	protein_coding	876.559	0.662477	4.60961	4.03425e-06	0.000120968	FDR < 0.10	29.6071
ENSG00000125538	IL1B	protein_coding	1779.16	0.661943	5.82726	5.63453e-09	5.4993e-07	FDR < 0.10	63.6521
ENSG00000164715	LMTK2	protein_coding	1171.75	0.661906	4.15351	3.27416e-05	0.000633227	FDR < 0.10	6.83429
ENSG00000171988	JMJD1C	protein_coding	3995.77	0.6619	5.06398	4.10586e-07	1.87164e-05	FDR < 0.10	61.925
ENSG00000105520	PLPPR2	protein_coding	4342.41	0.661519	3.68121	0.000232132	0.00268276	FDR < 0.10	98.3479
ENSG00000142657	PGD	protein_coding	9508.9	0.6615	4.47041	7.8071e-06	0.000200415	FDR < 0.10	303.599
ENSG00000178814	OPLAH	protein_coding	288.613	0.660339	2.75161	0.00593024	0.0319284	FDR < 0.10	4.62643
ENSG00000173110	HSPA6	protein_coding	5262.17	0.659857	3.66233	0.000249931	0.00283566	FDR < 0.10	121.621
ENSG00000215472	RPL17-C18orf32	protein_coding	230.448	0.659762	2.83636	0.00456307	0.0262193	FDR < 0.10	13.2229
ENSG00000170558	CDH2	protein_coding	58.4546	0.659444	2.73723	0.00619593	0.032961	FDR < 0.10	1.01143
ENSG00000136689	IL1RN	protein_coding	2612.14	0.659155	4.19917	2.6789e-05	0.000538972	FDR < 0.10	119.141
ENSG00000167874	TMEM88	protein_coding	75.5168	0.659092	2.50348	0.0122977	0.0543155	FDR < 0.10	5.70857
ENSG00000170956	CEACAM3	protein_coding	2707.65	0.658732	2.34629	0.0189611	0.0743699	FDR < 0.10	119.448
ENSG00000270882	HIST2H4A	protein_coding	263.742	0.658607	4.49672	6.90088e-06	0.000182063	FDR < 0.10	20.6129
ENSG00000156966	B3GNT7	protein_coding	111.36	0.658343	2.98188	0.00286485	0.0184855	FDR < 0.10	1.64929
ENSG00000170876	TMEM43	protein_coding	3829.29	0.657388	6.02693	1.67103e-09	1.92343e-07	FDR < 0.10	62.3564
ENSG00000165288	BRWD3	protein_coding	1093.91	0.654178	5.16668	2.38291e-07	1.21469e-05	FDR < 0.10	7.91929
ENSG00000051128	HOMER3	protein_coding	383.143	0.653946	4.63846	3.51013e-06	0.000107051	FDR < 0.10	16.5557
ENSG00000185905	C16orf54	protein_coding	7893.59	0.653248	5.90343	3.5603e-09	3.60398e-07	FDR < 0.10	167.289
ENSG00000182732	RGS6	protein_coding	101.844	0.652788	3.42408	0.000616875	0.00568042	FDR < 0.10	2.93143
ENSG00000244617	ASPRV1	protein_coding	421.467	0.65172	3.93329	8.37908e-05	0.00126042	FDR < 0.10	10.6686
ENSG00000147174	GCNA	protein_coding	61.304	0.651413	3.46552	0.000529209	0.00505244	FDR < 0.10	1.34429
ENSG00000183044	ABAT	protein_coding	1023.62	0.65118	3.89399	9.86097e-05	0.00142744	FDR < 0.10	12.0807
ENSG00000128383	APOBEC3A	protein_coding	3421.05	0.650541	3.83389	0.000126134	0.00172609	FDR < 0.10	239.425
ENSG00000112715	VEGFA	protein_coding	301.796	0.649207	3.21863	0.00128807	0.0101292	FDR < 0.10	6.545
ENSG00000123329	ARHGAP9	protein_coding	12158.4	0.648833	4.01136	6.0369e-05	0.000989261	FDR < 0.10	550.307
ENSG00000188404	SELL	protein_coding	47900.5	0.64854	4.53763	5.6891e-06	0.00015961	FDR < 0.10	1388.92
ENSG00000143226	FCGR2A	protein_coding	19906.4	0.648446	4.69641	2.64778e-06	8.53087e-05	FDR < 0.10	574.945
ENSG00000143376	SNX27	protein_coding	2421.25	0.647391	4.55128	5.33217e-06	0.000151606	FDR < 0.10	20.1514
ENSG00000163191	S100A11	protein_coding	27694.4	0.647105	5.04376	4.5647e-07	2.04238e-05	FDR < 0.10	3300.07
ENSG00000167552	TUBA1A	protein_coding	12862.8	0.645707	5.95356	2.62373e-09	2.85866e-07	FDR < 0.10	429.049
ENSG00000163694	RBM47	protein_coding	3254.94	0.645097	4.38857	1.14098e-05	0.000270518	FDR < 0.10	59.78
ENSG00000197852	FAM212B	protein_coding	4312.29	0.64464	4.00369	6.23632e-05	0.00101149	FDR < 0.10	40.7586
ENSG00000049323	LTBP1	protein_coding	182.493	0.643889	4.44962	8.60218e-06	0.000215024	FDR < 0.10	2.07214
ENSG00000186407	CD300E	protein_coding	3303.35	0.64365	4.51705	6.27085e-06	0.000171792	FDR < 0.10	50.9493
ENSG00000185245	GP1BA	protein_coding	169.74	0.643512	3.77699	0.000158736	0.00204296	FDR < 0.10	3.71929
ENSG00000177324	BEND2	protein_coding	171.014	0.642983	3.96188	7.43608e-05	0.00114989	FDR < 0.10	1.99429
ENSG00000102265	TIMP1	protein_coding	2922.33	0.642742	6.32142	2.59166e-10	4.06492e-08	FDR < 0.10	218.856
ENSG00000168939	SPRY3	protein_coding	46.1336	0.642271	2.63668	0.00837209	0.0412763	FDR < 0.10	0.265714
ENSG00000137575	SDCBP	protein_coding	15627.2	0.642224	4.70388	2.55268e-06	8.33386e-05	FDR < 0.10	638.927
ENSG00000158710	TAGLN2	protein_coding	42895.2	0.64175	6.59844	4.15498e-11	8.01406e-09	FDR < 0.10	1553.23
ENSG00000235568	NFAM1	protein_coding	16395.3	0.641713	4.55748	5.177e-06	0.00014826	FDR < 0.10	155.009
ENSG00000088053	GP6	protein_coding	109.647	0.639927	3.65488	0.000257299	0.00289624	FDR < 0.10	2.79643
ENSG00000168461	RAB31	protein_coding	4835.24	0.639669	6.58486	4.55304e-11	8.43968e-09	FDR < 0.10	70.4479
ENSG00000175866	BAIAP2	protein_coding	249.338	0.639309	5.03775	4.71048e-07	2.10102e-05	FDR < 0.10	7.43643
ENSG00000181274	FRAT2	protein_coding	10267.4	0.639293	4.56603	4.97041e-06	0.0001439	FDR < 0.10	255.634
ENSG00000151693	ASAP2	protein_coding	81.7453	0.638378	3.40036	0.000672978	0.00609064	FDR < 0.10	1.02714
ENSG00000111052	LIN7A	protein_coding	684.909	0.637207	4.10031	4.12593e-05	0.000750184	FDR < 0.10	16.455
ENSG00000163635	ATXN7	protein_coding	1417.92	0.637106	5.5094	3.60051e-08	2.60863e-06	FDR < 0.10	14.5771
ENSG00000162543	UBXN10	protein_coding	48.5336	0.63701	2.90798	0.00363771	0.0222191	FDR < 0.10	0.464286
ENSG00000173890	GPR160	protein_coding	361.468	0.635525	4.25897	2.0537e-05	0.000436198	FDR < 0.10	11.0264
ENSG00000165650	PDZD8	protein_coding	742.967	0.6347	4.89593	9.78435e-07	3.81563e-05	FDR < 0.10	8.84429
ENSG00000213903	LTB4R	protein_coding	2865.78	0.634644	3.36435	0.000767235	0.00677226	FDR < 0.10	62.8271
ENSG00000134198	TSPAN2	protein_coding	669.41	0.634302	6.58847	4.44385e-11	8.34567e-09	FDR < 0.10	29.3421
ENSG00000272196	HIST2H2AA4	protein_coding	1223.67	0.634003	3.43945	0.000582907	0.00542716	FDR < 0.10	155.382
ENSG00000163393	SLC22A15	protein_coding	339.982	0.633212	4.04495	5.23348e-05	0.000903234	FDR < 0.10	4.67571
ENSG00000100368	CSF2RB	protein_coding	22337.4	0.633087	4.38783	1.14488e-05	0.000270629	FDR < 0.10	252.208
ENSG00000139318	DUSP6	protein_coding	5803.62	0.632889	8.75884	1.97272e-18	1.56426e-15	FDR < 0.10	161.818
ENSG00000159388	BTG2	protein_coding	8659.56	0.632703	6.2718	3.56893e-10	5.30618e-08	FDR < 0.10	191.401
ENSG00000157600	TMEM164	protein_coding	5658.48	0.632655	4.70333	2.55947e-06	8.33386e-05	FDR < 0.10	66.7464
ENSG00000204577	LILRB3	protein_coding	9722.48	0.63256	3.93034	8.48258e-05	0.00127186	FDR < 0.10	331.183
ENSG00000242732	RGAG4	protein_coding	81.593	0.631829	2.99678	0.00272849	0.0177907	FDR < 0.10	1.015
ENSG00000151023	ENKUR	protein_coding	152.705	0.629153	3.92183	8.78794e-05	0.00130793	FDR < 0.10	7.77714
ENSG00000156671	SAMD8	protein_coding	582.584	0.628779	5.14154	2.72495e-07	1.36133e-05	FDR < 0.10	5.11786
ENSG00000008086	CDKL5	protein_coding	308.275	0.628259	3.81313	0.000137217	0.0018325	FDR < 0.10	1.41429
ENSG00000163349	HIPK1	protein_coding	3873.14	0.628202	6.09337	1.10561e-09	1.40896e-07	FDR < 0.10	33.1693
ENSG00000086061	DNAJA1	protein_coding	3591.28	0.62801	8.37306	5.61391e-17	3.4838e-14	FDR < 0.10	84.1579
ENSG00000161921	CXCL16	protein_coding	2776.05	0.626309	4.45621	8.3421e-06	0.000209994	FDR < 0.10	85.7529
ENSG00000140848	CPNE2	protein_coding	959.618	0.62437	5.19473	2.05013e-07	1.07579e-05	FDR < 0.10	29.4043
ENSG00000058091	CDK14	protein_coding	421.929	0.624363	4.63527	3.56466e-06	0.000108483	FDR < 0.10	6.58929
ENSG00000072401	UBE2D1	protein_coding	1564.1	0.62409	6.05184	1.43197e-09	1.68914e-07	FDR < 0.10	33.2421
ENSG00000137642	SORL1	protein_coding	31427	0.623822	4.17993	2.91592e-05	0.000574055	FDR < 0.10	160.564
ENSG00000101474	APMAP	protein_coding	6472.24	0.623813	5.36946	7.89744e-08	4.91452e-06	FDR < 0.10	149.612
ENSG00000087253	LPCAT2	protein_coding	1866.38	0.622998	4.29665	1.734e-05	0.000379009	FDR < 0.10	32.8114
ENSG00000129295	LRRC6	protein_coding	47.3355	0.621989	2.30789	0.0210053	0.0805073	FDR < 0.10	3.22714
ENSG00000135083	CCNJL	protein_coding	1749.36	0.621939	3.76149	0.000168903	0.00213341	FDR < 0.10	37.9307
ENSG00000144118	RALB	protein_coding	5384.97	0.621743	5.27477	1.32924e-07	7.44011e-06	FDR < 0.10	145.086
ENSG00000012779	ALOX5	protein_coding	10707.6	0.620272	2.31755	0.0204738	0.0788939	FDR < 0.10	288.205
ENSG00000160712	IL6R	protein_coding	16830.2	0.619991	4.32941	1.49508e-05	0.00033913	FDR < 0.10	163.539
ENSG00000184500	PROS1	protein_coding	46.9163	0.619797	2.45971	0.0139049	0.0594384	FDR < 0.10	0.752143
ENSG00000145819	ARHGAP26	protein_coding	4157.28	0.618503	4.56631	4.9639e-06	0.0001439	FDR < 0.10	52.6029
ENSG00000033327	GAB2	protein_coding	4818.67	0.618176	3.67685	0.000236129	0.00271577	FDR < 0.10	43.2186
ENSG00000177125	ZBTB34	protein_coding	1594.8	0.617283	4.1969	2.70599e-05	0.000541691	FDR < 0.10	12.7357
ENSG00000180509	KCNE1	protein_coding	125.321	0.617278	2.21336	0.0268725	0.0961522	FDR < 0.10	3.76357
ENSG00000172985	SH3RF3	protein_coding	261.749	0.616755	3.04473	0.00232886	0.0158361	FDR < 0.10	2.37357
ENSG00000166527	CLEC4D	protein_coding	255.247	0.616611	4.50231	6.72174e-06	0.000180273	FDR < 0.10	10.57
ENSG00000103194	USP10	protein_coding	3901.51	0.615784	5.0857	3.66279e-07	1.7029e-05	FDR < 0.10	247.046
ENSG00000067182	TNFRSF1A	protein_coding	11126.6	0.615457	4.71017	2.47516e-06	8.15888e-05	FDR < 0.10	325.146
ENSG00000188906	LRRK2	protein_coding	10325.2	0.615081	3.7218	0.000197804	0.00237828	FDR < 0.10	77.4021
ENSG00000196872	KIAA1211L	protein_coding	141.553	0.61494	3.55391	0.000379551	0.00391425	FDR < 0.10	2.88643
ENSG00000175556	LONRF3	protein_coding	60.436	0.614373	2.85172	0.00434829	0.0253319	FDR < 0.10	1.26643
ENSG00000136231	IGF2BP3	protein_coding	34.5209	0.614063	2.42933	0.0151267	0.0633148	FDR < 0.10	1.21286
ENSG00000213347	MXD3	protein_coding	877.558	0.61398	3.41817	0.000630443	0.00577926	FDR < 0.10	61.8
ENSG00000011422	PLAUR	protein_coding	3350.62	0.613603	3.64845	0.000263829	0.0029604	FDR < 0.10	139.873
ENSG00000176597	B3GNT5	protein_coding	280.729	0.612918	4.09081	4.29875e-05	0.000771774	FDR < 0.10	4.21286
ENSG00000116299	KIAA1324	protein_coding	2321.42	0.612916	3.59468	0.000324792	0.00346611	FDR < 0.10	36.1914
ENSG00000185650	ZFP36L1	protein_coding	11716	0.612668	4.45167	8.52057e-06	0.000213358	FDR < 0.10	326.152
ENSG00000135870	RC3H1	protein_coding	1217.85	0.612537	5.20726	1.91647e-07	1.02066e-05	FDR < 0.10	9.90571
ENSG00000120156	TEK	protein_coding	60.4663	0.612254	2.69859	0.00696333	0.0361278	FDR < 0.10	0.764286
ENSG00000130066	SAT1	protein_coding	9211.96	0.612063	5.77561	7.66756e-09	6.97064e-07	FDR < 0.10	540.198
ENSG00000168769	TET2	protein_coding	2166.9	0.611019	4.48708	7.2207e-06	0.000189103	FDR < 0.10	12.0664
ENSG00000173930	SLCO4C1	protein_coding	542.284	0.609854	3.76082	0.000169354	0.00213721	FDR < 0.10	5.34643
ENSG00000136603	SKIL	protein_coding	250.811	0.609192	4.99638	5.84165e-07	2.51897e-05	FDR < 0.10	3.575
ENSG00000120306	CYSTM1	protein_coding	1210.86	0.608612	5.13863	2.76747e-07	1.37153e-05	FDR < 0.10	87.5414
ENSG00000100266	PACSIN2	protein_coding	5052.65	0.608408	4.7734	1.81138e-06	6.33671e-05	FDR < 0.10	91.3379
ENSG00000140575	IQGAP1	protein_coding	16940.6	0.608152	5.29274	1.205e-07	6.85218e-06	FDR < 0.10	279.251
ENSG00000108946	PRKAR1A	protein_coding	8908.06	0.60737	6.18234	6.31564e-10	8.58507e-08	FDR < 0.10	260.947
ENSG00000135766	EGLN1	protein_coding	3932.65	0.606561	4.72436	2.30846e-06	7.7709e-05	FDR < 0.10	51.0129
ENSG00000160593	JAML	protein_coding	24831.1	0.606182	3.6884	0.000225669	0.00262294	FDR < 0.10	729.652
ENSG00000158887	MPZ	protein_coding	124.977	0.606081	2.5973	0.00939595	0.044886	FDR < 0.10	5.15643
ENSG00000084731	KIF3C	protein_coding	375.121	0.605122	3.44356	0.000574113	0.00537685	FDR < 0.10	5.02786
ENSG00000101307	SIRPB1	protein_coding	7323.25	0.605121	3.72586	0.000194652	0.00235646	FDR < 0.10	205.334
ENSG00000182795	C1orf116	protein_coding	45.261	0.604683	2.62648	0.00862724	0.0422859	FDR < 0.10	0.56
ENSG00000004478	FKBP4	protein_coding	945.574	0.6041	6.99445	2.66303e-12	6.44227e-10	FDR < 0.10	14.9221
ENSG00000005020	SKAP2	protein_coding	3198.37	0.603992	4.55313	5.28542e-06	0.000150576	FDR < 0.10	57.3721
ENSG00000126945	HNRNPH2	protein_coding	3339.2	0.603964	6.52497	6.80137e-11	1.19847e-08	FDR < 0.10	83.1279
ENSG00000148498	PARD3	protein_coding	56.1637	0.603016	2.64141	0.00825611	0.0408739	FDR < 0.10	0.94
ENSG00000101265	RASSF2	protein_coding	20055.4	0.602296	4.24212	2.21414e-05	0.000464742	FDR < 0.10	196.209
ENSG00000198189	HSD17B11	protein_coding	4215.99	0.602246	5.51737	3.44118e-08	2.51877e-06	FDR < 0.10	170.158
ENSG00000121060	TRIM25	protein_coding	4214.77	0.602142	3.86164	0.000112627	0.00158065	FDR < 0.10	55.7586
ENSG00000111817	DSE	protein_coding	728.994	0.601713	4.51091	6.45497e-06	0.000175754	FDR < 0.10	9.08429
ENSG00000110046	ATG2A	protein_coding	3510.05	0.601431	3.29704	0.000977103	0.00818439	FDR < 0.10	52.5043
ENSG00000068323	TFE3	protein_coding	4117.02	0.60112	4.14526	3.3943e-05	0.000652922	FDR < 0.10	67.6186
ENSG00000171223	JUNB	protein_coding	9963.89	0.600982	5.05066	4.40283e-07	1.97615e-05	FDR < 0.10	307.93
ENSG00000118900	UBN1	protein_coding	7321.04	0.59991	3.81808	0.000134495	0.00180249	FDR < 0.10	68.165
ENSG00000129657	SEC14L1	protein_coding	17050.8	0.599782	3.9398	8.15493e-05	0.00123693	FDR < 0.10	253.109
ENSG00000101084	C20orf24	protein_coding	3334.23	0.599587	5.6674	1.44977e-08	1.21721e-06	FDR < 0.10	182.829
ENSG00000120709	FAM53C	protein_coding	4970.47	0.59933	3.59175	0.00032847	0.00349348	FDR < 0.10	62.6679
ENSG00000242110	AMACR	protein_coding	240.123	0.599217	3.75888	0.000170672	0.00214626	FDR < 0.10	6.59857
ENSG00000196562	SULF2	protein_coding	5997.75	0.598298	4.39869	1.08907e-05	0.000260374	FDR < 0.10	116.273
ENSG00000139946	PELI2	protein_coding	1005.58	0.598087	4.24481	2.18779e-05	0.000460566	FDR < 0.10	11.0593
ENSG00000173171	MTX1	protein_coding	1173.98	0.598026	5.15046	2.59853e-07	1.31521e-05	FDR < 0.10	56.9414
ENSG00000140749	IGSF6	protein_coding	5923.52	0.597611	4.50846	6.52988e-06	0.000177188	FDR < 0.10	180.574
ENSG00000006652	IFRD1	protein_coding	1537.16	0.597119	3.85225	0.000117039	0.00162976	FDR < 0.10	40.5364
ENSG00000071967	CYBRD1	protein_coding	1055.74	0.594629	5.9039	3.55009e-09	3.60398e-07	FDR < 0.10	14.6286
ENSG00000162444	RBP7	protein_coding	832.463	0.59439	3.91063	9.20569e-05	0.00135457	FDR < 0.10	89.5014
ENSG00000122884	P4HA1	protein_coding	486.93	0.594058	6.19454	5.84547e-10	8.10023e-08	FDR < 0.10	10.2179
ENSG00000102218	RP2	protein_coding	1620.15	0.593908	6.05819	1.37662e-09	1.6416e-07	FDR < 0.10	22.8479
ENSG00000115339	GALNT3	protein_coding	570.157	0.592387	4.48439	7.3123e-06	0.000191151	FDR < 0.10	9.36286
ENSG00000188215	DCUN1D3	protein_coding	184.023	0.592169	4.79139	1.65628e-06	5.96973e-05	FDR < 0.10	2.35714
ENSG00000180549	FUT7	protein_coding	1492.68	0.592049	4.14014	3.47091e-05	0.000661286	FDR < 0.10	31.5257
ENSG00000124588	NQO2	protein_coding	1045.07	0.59118	4.08791	4.35272e-05	0.000774643	FDR < 0.10	59.665
ENSG00000116991	SIPA1L2	protein_coding	802.136	0.590771	3.44908	0.000562493	0.00529932	FDR < 0.10	8.04357
ENSG00000188559	RALGAPA2	protein_coding	1484.2	0.589823	4.10168	4.10157e-05	0.000747147	FDR < 0.10	10.9421
ENSG00000169896	ITGAM	protein_coding	8316.66	0.589486	4.0383	5.38398e-05	0.00091811	FDR < 0.10	120.159
ENSG00000064012	CASP8	protein_coding	4542.19	0.589277	6.05777	1.38017e-09	1.6416e-07	FDR < 0.10	135.708
ENSG00000163563	MNDA	protein_coding	41231.1	0.588791	4.6521	3.28568e-06	0.00010219	FDR < 0.10	1339.09
ENSG00000123505	AMD1	protein_coding	2754.9	0.58719	5.17041	2.33578e-07	1.20109e-05	FDR < 0.10	51.7279
ENSG00000084234	APLP2	protein_coding	13534.2	0.586965	5.42259	5.8742e-08	3.81102e-06	FDR < 0.10	241.737
ENSG00000111181	SLC6A12	protein_coding	124.513	0.58692	2.8499	0.00437324	0.025437	FDR < 0.10	3.34929
ENSG00000196209	SIRPB2	protein_coding	3449.99	0.586728	3.38532	0.000710961	0.00636431	FDR < 0.10	98.2621
ENSG00000170832	USP32	protein_coding	2688.64	0.586016	4.01938	5.83509e-05	0.000965055	FDR < 0.10	55.1179
ENSG00000168297	PXK	protein_coding	1037.59	0.585915	4.78682	1.69447e-06	6.06146e-05	FDR < 0.10	28.8779
ENSG00000178726	THBD	protein_coding	1362.47	0.585788	4.00787	6.12685e-05	0.00100037	FDR < 0.10	17.6579
ENSG00000121316	PLBD1	protein_coding	6237.25	0.585682	5.03686	4.73224e-07	2.10415e-05	FDR < 0.10	155.33
ENSG00000117335	CD46	protein_coding	9386.19	0.585153	4.65258	3.27803e-06	0.00010219	FDR < 0.10	161.154
ENSG00000251201	TMED7-TICAM2	protein_coding	163.367	0.584777	2.54014	0.011081	0.0505628	FDR < 0.10	2.67286
ENSG00000123610	TNFAIP6	protein_coding	677.229	0.584758	3.70753	0.000209291	0.00248111	FDR < 0.10	28.6886
ENSG00000163932	PRKCD	protein_coding	7369.95	0.584695	3.67735	0.000235671	0.00271488	FDR < 0.10	150.339
ENSG00000091262	ABCC6	protein_coding	82.1475	0.583952	2.88087	0.00396575	0.0237283	FDR < 0.10	2.09429
ENSG00000134755	DSC2	protein_coding	686.558	0.583791	4.03948	5.3569e-05	0.000915678	FDR < 0.10	6.41929
ENSG00000174516	PELI3	protein_coding	197.675	0.583264	4.04668	5.19495e-05	0.000898757	FDR < 0.10	4.55929
ENSG00000137331	IER3	protein_coding	805.909	0.582615	3.54825	0.0003878	0.00397349	FDR < 0.10	37.745
ENSG00000125753	VASP	protein_coding	22110	0.582544	4.66489	3.08783e-06	9.77221e-05	FDR < 0.10	671.999
ENSG00000101916	TLR8	protein_coding	3945.57	0.581781	4.65595	3.2249e-06	0.000101624	FDR < 0.10	50.0193
ENSG00000169403	PTAFR	protein_coding	15118.9	0.58068	3.90067	9.59268e-05	0.00139568	FDR < 0.10	191.809
ENSG00000047648	ARHGAP6	protein_coding	99.1522	0.580352	3.39026	0.000698252	0.00629176	FDR < 0.10	1.41857
ENSG00000184588	PDE4B	protein_coding	2283.9	0.580305	4.68517	2.79732e-06	8.93201e-05	FDR < 0.10	32.6271
ENSG00000116701	NCF2	protein_coding	31359.5	0.580171	4.57674	4.72285e-06	0.000138417	FDR < 0.10	813.097
ENSG00000123636	BAZ2B	protein_coding	1455.99	0.579598	4.18305	2.87619e-05	0.000567799	FDR < 0.10	29.9064
ENSG00000065243	PKN2	protein_coding	1052.23	0.579334	4.02722	5.64393e-05	0.000946601	FDR < 0.10	14.2814
ENSG00000173846	PLK3	protein_coding	705.107	0.579177	4.20912	2.56372e-05	0.000520671	FDR < 0.10	22.4943
ENSG00000140090	SLC24A4	protein_coding	702.044	0.578489	5.39808	6.73579e-08	4.29196e-06	FDR < 0.10	4.80571
ENSG00000136826	KLF4	protein_coding	665.243	0.578233	5.03403	4.80277e-07	2.12229e-05	FDR < 0.10	13.8693
ENSG00000062716	VMP1	protein_coding	11541	0.57803	4.80576	1.54169e-06	5.62187e-05	FDR < 0.10	393.662
ENSG00000150457	LATS2	protein_coding	476.571	0.577823	4.87033	1.11411e-06	4.25179e-05	FDR < 0.10	5.21643
ENSG00000058866	DGKG	protein_coding	258.046	0.576966	3.64769	0.000264611	0.00296451	FDR < 0.10	3.40857
ENSG00000197555	SIPA1L1	protein_coding	2826.24	0.576944	4.37341	1.22321e-05	0.000285276	FDR < 0.10	42.9757
ENSG00000131389	SLC6A6	protein_coding	10943.6	0.576709	3.63041	0.000282968	0.00313086	FDR < 0.10	96.3486
ENSG00000174175	SELP	protein_coding	201.825	0.576254	3.84494	0.000120582	0.00167093	FDR < 0.10	4.89429
ENSG00000064932	SBNO2	protein_coding	7826.28	0.575751	3.75247	0.000175102	0.00217241	FDR < 0.10	100.214
ENSG00000017797	RALBP1	protein_coding	4491.59	0.575462	4.60639	4.09718e-06	0.000122598	FDR < 0.10	59.29
ENSG00000168874	ATOH8	protein_coding	56.7126	0.575427	2.62666	0.00862279	0.0422786	FDR < 0.10	1.50643
ENSG00000118520	ARG1	protein_coding	295.5	0.575224	2.75539	0.00586228	0.0316863	FDR < 0.10	14.9921
ENSG00000167470	MIDN	protein_coding	6439.41	0.575158	4.38049	1.18411e-05	0.000277518	FDR < 0.10	104.963
ENSG00000124831	LRRFIP1	protein_coding	7896.14	0.574238	6.16585	7.0105e-10	9.35149e-08	FDR < 0.10	112.024
ENSG00000140563	MCTP2	protein_coding	1809.22	0.573847	4.03286	5.51031e-05	0.000936293	FDR < 0.10	29.3271
ENSG00000170892	TSEN34	protein_coding	3853.36	0.573124	4.19771	2.69628e-05	0.000540506	FDR < 0.10	162.34
ENSG00000109756	RAPGEF2	protein_coding	1724.65	0.573022	4.84202	1.28523e-06	4.81472e-05	FDR < 0.10	35.1479
ENSG00000130775	THEMIS2	protein_coding	11361.2	0.572676	4.20396	2.62281e-05	0.000529496	FDR < 0.10	312.01
ENSG00000165006	UBAP1	protein_coding	3249.34	0.572433	5.11045	3.21393e-07	1.53543e-05	FDR < 0.10	67.015
ENSG00000163162	RNF149	protein_coding	9683.61	0.57234	5.34244	9.17054e-08	5.47662e-06	FDR < 0.10	235.554
ENSG00000104324	CPQ	protein_coding	2061.62	0.572166	4.56442	5.00871e-06	0.000144715	FDR < 0.10	65.6693
ENSG00000085185	BCORL1	protein_coding	721.8	0.570876	3.60313	0.000314412	0.00339713	FDR < 0.10	6.89714
ENSG00000137509	PRCP	protein_coding	3434.12	0.570864	5.41459	6.14298e-08	3.96736e-06	FDR < 0.10	83.1429
ENSG00000197329	PELI1	protein_coding	4401.68	0.570442	4.20905	2.56451e-05	0.000520671	FDR < 0.10	65.7286
ENSG00000073910	FRY	protein_coding	1663.35	0.57035	3.82142	0.000132684	0.0017866	FDR < 0.10	22.1793
ENSG00000131471	AOC3	protein_coding	286.794	0.569861	2.28328	0.0224137	0.0845428	FDR < 0.10	5.03929
ENSG00000168610	STAT3	protein_coding	10129.3	0.569775	4.42823	9.50092e-06	0.000233001	FDR < 0.10	124.417
ENSG00000135114	OASL	protein_coding	1289.88	0.569721	5.92812	3.06429e-09	3.21755e-07	FDR < 0.10	28.9529
ENSG00000196954	CASP4	protein_coding	6190.38	0.56895	6.02333	1.7086e-09	1.95095e-07	FDR < 0.10	305.516
ENSG00000149177	PTPRJ	protein_coding	8855.81	0.568686	4.2425	2.21048e-05	0.000464656	FDR < 0.10	62.725
ENSG00000172216	CEBPB	protein_coding	9559.58	0.568574	4.86263	1.15838e-06	4.39723e-05	FDR < 0.10	272.521
ENSG00000113369	ARRDC3	protein_coding	3678.37	0.568505	5.07656	3.8432e-07	1.78097e-05	FDR < 0.10	58.48
ENSG00000121957	GPSM2	protein_coding	171.844	0.56821	2.74242	0.00609891	0.0326395	FDR < 0.10	2.78571
ENSG00000114013	CD86	protein_coding	1064.84	0.568107	4.46125	8.14832e-06	0.000206207	FDR < 0.10	26.3236
ENSG00000164440	TXLNB	protein_coding	36.6789	0.568028	2.26047	0.0237924	0.0881591	FDR < 0.10	0.426429
ENSG00000179604	CDC42EP4	protein_coding	333.803	0.567396	3.97172	7.13567e-05	0.0011192	FDR < 0.10	5.75357
ENSG00000119013	NDUFB3	protein_coding	677.586	0.567191	4.64669	3.37307e-06	0.00010466	FDR < 0.10	62.1129
ENSG00000117586	TNFSF4	protein_coding	142.628	0.566947	3.9782	6.94389e-05	0.00109514	FDR < 0.10	2.83571
ENSG00000175197	DDIT3	protein_coding	649.222	0.56634	4.11297	3.90603e-05	0.000718438	FDR < 0.10	44.35
ENSG00000120129	DUSP1	protein_coding	12499	0.566222	3.84061	0.000122729	0.00169362	FDR < 0.10	345.226
ENSG00000157514	TSC22D3	protein_coding	32949.1	0.565829	4.80749	1.52835e-06	5.60774e-05	FDR < 0.10	939.496
ENSG00000105656	ELL	protein_coding	2572.14	0.564537	3.74566	0.000179918	0.00220996	FDR < 0.10	36.6164
ENSG00000106070	GRB10	protein_coding	208.613	0.564251	2.67086	0.00756569	0.038473	FDR < 0.10	3.52214
ENSG00000259207	ITGB3	protein_coding	1069.65	0.563438	4.62886	3.67686e-06	0.000111659	FDR < 0.10	15.4643
ENSG00000167207	NOD2	protein_coding	1306.53	0.563084	3.72525	0.000195125	0.00236018	FDR < 0.10	18.8779
ENSG00000172197	MBOAT1	protein_coding	329.135	0.562835	2.99227	0.0027691	0.0179897	FDR < 0.10	10.3179
ENSG00000005339	CREBBP	protein_coding	6341.24	0.561973	3.88179	0.000103688	0.00148143	FDR < 0.10	38.1214
ENSG00000151151	IPMK	protein_coding	739.889	0.561204	3.91732	8.95402e-05	0.00132299	FDR < 0.10	6.36929
ENSG00000144711	IQSEC1	protein_coding	7291.55	0.560605	4.30103	1.70003e-05	0.0003733	FDR < 0.10	83.6857
ENSG00000072422	RHOBTB1	protein_coding	106.299	0.560485	3.13895	0.00169555	0.0125783	FDR < 0.10	1.50643
ENSG00000070961	ATP2B1	protein_coding	2161.05	0.560132	6.97717	3.0118e-12	7.16456e-10	FDR < 0.10	31.67
ENSG00000110077	MS4A6A	protein_coding	2901.71	0.559957	4.69999	2.60173e-06	8.42671e-05	FDR < 0.10	232.763
ENSG00000185340	GAS2L1	protein_coding	556.821	0.559862	5.21999	1.7893e-07	9.61564e-06	FDR < 0.10	13.1957
ENSG00000111424	VDR	protein_coding	1050.08	0.559052	3.98244	6.82107e-05	0.00107935	FDR < 0.10	12.8829
ENSG00000136404	TM6SF1	protein_coding	624.196	0.558847	3.75896	0.000170618	0.00214626	FDR < 0.10	23.5329
ENSG00000185201	IFITM2	protein_coding	84304.3	0.557606	3.93079	8.46662e-05	0.00127186	FDR < 0.10	9168.17
ENSG00000136810	TXN	protein_coding	1855.1	0.557505	4.11806	3.82083e-05	0.000707325	FDR < 0.10	135.461
ENSG00000005893	LAMP2	protein_coding	5676.74	0.557065	4.31496	1.59632e-05	0.000354342	FDR < 0.10	137.637
ENSG00000159882	ZNF230	protein_coding	449.588	0.556807	4.98022	6.35124e-07	2.69796e-05	FDR < 0.10	8.89929
ENSG00000068366	ACSL4	protein_coding	1619.96	0.556414	5.09877	3.41863e-07	1.5998e-05	FDR < 0.10	22.3693
ENSG00000163220	S100A9	protein_coding	164494	0.555694	4.09265	4.26474e-05	0.000768568	FDR < 0.10	20356.3
ENSG00000100731	PCNX1	protein_coding	3328.51	0.554917	4.38776	1.14524e-05	0.000270629	FDR < 0.10	31.26
ENSG00000038427	VCAN	protein_coding	7715.62	0.55459	4.32305	1.53884e-05	0.000345345	FDR < 0.10	84.7443
ENSG00000110395	CBL	protein_coding	4269.57	0.553166	4.08851	4.34158e-05	0.000774643	FDR < 0.10	21.71
ENSG00000158792	SPATA2L	protein_coding	451.668	0.553049	4.30223	1.69087e-05	0.000371861	FDR < 0.10	11.7986
ENSG00000137177	KIF13A	protein_coding	1844.08	0.552638	3.37667	0.000733702	0.00653097	FDR < 0.10	20.8686
ENSG00000139117	CPNE8	protein_coding	111.574	0.552442	3.28951	0.00100362	0.0083721	FDR < 0.10	2.44143
ENSG00000164104	HMGB2	protein_coding	4098.32	0.552097	5.46476	4.63533e-08	3.12146e-06	FDR < 0.10	205.124
ENSG00000125827	TMX4	protein_coding	3787.79	0.551409	5.94662	2.73743e-09	2.95995e-07	FDR < 0.10	34.635
ENSG00000137563	GGH	protein_coding	55.7297	0.551369	2.43631	0.0148378	0.0624536	FDR < 0.10	2.60714
ENSG00000197965	MPZL1	protein_coding	2445.23	0.551176	3.81885	0.000134075	0.00179855	FDR < 0.10	61.6679
ENSG00000273802	HIST1H2BG	protein_coding	90.4148	0.551093	2.7766	0.00549299	0.0302358	FDR < 0.10	3.35429
ENSG00000203747	FCGR3A	protein_coding	20304.8	0.549431	5.00709	5.52598e-07	2.39733e-05	FDR < 0.10	762.585
ENSG00000110422	HIPK3	protein_coding	2636.78	0.549055	5.81024	6.23845e-09	5.97593e-07	FDR < 0.10	23.85
ENSG00000081985	IL12RB2	protein_coding	97.2559	0.548851	2.69588	0.00702028	0.0363549	FDR < 0.10	1.81429
ENSG00000091317	CMTM6	protein_coding	7262.01	0.548561	5.35691	8.4658e-08	5.18138e-06	FDR < 0.10	101.791
ENSG00000118263	KLF7	protein_coding	1617.4	0.547703	3.66424	0.000248075	0.00282133	FDR < 0.10	12.6621
ENSG00000083444	PLOD1	protein_coding	1657.72	0.547564	4.16796	3.07339e-05	0.000600089	FDR < 0.10	36.7979
ENSG00000165185	KIAA1958	protein_coding	71.1745	0.546365	2.80729	0.00499599	0.0280298	FDR < 0.10	0.679286
ENSG00000072864	NDE1	protein_coding	2987.46	0.545818	3.90469	9.43466e-05	0.00137831	FDR < 0.10	71.1136
ENSG00000239998	LILRA2	protein_coding	9861.1	0.545611	3.67334	0.000239403	0.00274458	FDR < 0.10	398.034
ENSG00000141279	NPEPPS	protein_coding	2563.47	0.545531	3.94007	8.14577e-05	0.00123686	FDR < 0.10	46.3457
ENSG00000132155	RAF1	protein_coding	7575.99	0.545516	3.72242	0.000197319	0.00237665	FDR < 0.10	153.523
ENSG00000008130	NADK	protein_coding	16556.6	0.545225	3.54186	0.000397312	0.0040506	FDR < 0.10	388.311
ENSG00000142687	KIAA0319L	protein_coding	2244.7	0.545208	3.90173	9.55077e-05	0.001391	FDR < 0.10	33.8857
ENSG00000105483	CARD8	protein_coding	4108.29	0.544934	4.11262	3.912e-05	0.00071861	FDR < 0.10	107.692
ENSG00000172081	MOB3A	protein_coding	17133.9	0.544232	4.07229	4.65525e-05	0.00081828	FDR < 0.10	304.564
ENSG00000117298	ECE1	protein_coding	7222.84	0.543989	4.58572	4.52419e-06	0.000133693	FDR < 0.10	84.1129
ENSG00000180596	HIST1H2BC	protein_coding	545	0.54391	3.99585	6.44617e-05	0.00103845	FDR < 0.10	60.4457
ENSG00000125505	MBOAT7	protein_coding	18627.3	0.543905	3.24375	0.00117967	0.00945389	FDR < 0.10	536.807
ENSG00000089902	RCOR1	protein_coding	2107.99	0.543865	3.87291	0.000107543	0.00152211	FDR < 0.10	20.0514
ENSG00000132205	EMILIN2	protein_coding	2472.09	0.543123	4.52037	6.17328e-06	0.000169771	FDR < 0.10	26.6707
ENSG00000204397	CARD16	protein_coding	2486.3	0.54276	6.57777	4.77554e-11	8.73862e-09	FDR < 0.10	270.382
ENSG00000162757	C1orf74	protein_coding	45.6747	0.542684	2.43677	0.0148193	0.0624037	FDR < 0.10	0.520714
ENSG00000116016	EPAS1	protein_coding	123.358	0.542654	2.84737	0.00440818	0.0255972	FDR < 0.10	1.84786
ENSG00000135838	NPL	protein_coding	2519.88	0.542561	3.48815	0.00048637	0.00471921	FDR < 0.10	93.2379
ENSG00000163131	CTSS	protein_coding	51378.9	0.541639	5.98948	2.10517e-09	2.32924e-07	FDR < 0.10	2132.83
ENSG00000129292	PHF20L1	protein_coding	1632.82	0.541591	5.497	3.86307e-08	2.75688e-06	FDR < 0.10	23.035
ENSG00000181444	ZNF467	protein_coding	4090.69	0.541004	4.0221	5.76806e-05	0.000960512	FDR < 0.10	116.515
ENSG00000173825	TIGD3	protein_coding	741.585	0.540989	4.12294	3.74068e-05	0.000696316	FDR < 0.10	20.55
ENSG00000174125	TLR1	protein_coding	2558.75	0.540957	3.99601	6.442e-05	0.00103845	FDR < 0.10	61.8086
ENSG00000188786	MTF1	protein_coding	1128.27	0.5407	4.71204	2.45246e-06	8.10277e-05	FDR < 0.10	7.69929
ENSG00000198814	GK	protein_coding	1220.24	0.540433	4.692	2.70543e-06	8.69697e-05	FDR < 0.10	31
ENSG00000156414	TDRD9	protein_coding	111.133	0.54032	2.92892	0.00340138	0.0210986	FDR < 0.10	1.93214
ENSG00000173868	PHOSPHO1	protein_coding	12458.3	0.539679	3.54078	0.000398945	0.00406144	FDR < 0.10	410.598
ENSG00000172765	TMCC1	protein_coding	1904.97	0.539618	4.02102	5.79475e-05	0.000961727	FDR < 0.10	33.3721
ENSG00000096063	SRPK1	protein_coding	1641.15	0.539095	4.91167	9.03028e-07	3.59023e-05	FDR < 0.10	22.3486
ENSG00000150054	MPP7	protein_coding	508.219	0.538556	6.06622	1.30957e-09	1.60495e-07	FDR < 0.10	7.18786
ENSG00000197324	LRP10	protein_coding	21034.3	0.538356	3.50892	0.000449934	0.00444423	FDR < 0.10	270.351
ENSG00000196684	HSH2D	protein_coding	4995.68	0.538302	3.75574	0.000172832	0.00215953	FDR < 0.10	155.174
ENSG00000141179	PCTP	protein_coding	902.748	0.538254	4.53752	5.69196e-06	0.00015961	FDR < 0.10	24.7114
ENSG00000119900	OGFRL1	protein_coding	7050.98	0.538173	3.87213	0.000107886	0.00152461	FDR < 0.10	45.2936
ENSG00000136250	AOAH	protein_coding	3271.17	0.537951	6.00826	1.87522e-09	2.09101e-07	FDR < 0.10	121.994
ENSG00000038219	BOD1L1	protein_coding	4438.3	0.537871	3.76683	0.000165334	0.00210321	FDR < 0.10	53.7871
ENSG00000123684	LPGAT1	protein_coding	3245.52	0.537796	5.23118	1.68434e-07	9.1409e-06	FDR < 0.10	26.4771
ENSG00000164683	HEY1	protein_coding	54.5298	0.53771	2.39812	0.0164795	0.0672997	FDR < 0.10	1.53071
ENSG00000184678	HIST2H2BE	protein_coding	1400.97	0.536671	3.0189	0.00253698	0.0168263	FDR < 0.10	35.1657
ENSG00000105993	DNAJB6	protein_coding	3115.92	0.536646	6.47731	9.33725e-11	1.58655e-08	FDR < 0.10	102.139
ENSG00000186469	GNG2	protein_coding	4182.19	0.535843	6.46916	9.85518e-11	1.65486e-08	FDR < 0.10	118.349
ENSG00000147459	DOCK5	protein_coding	3721.27	0.535787	2.85294	0.00433169	0.0252586	FDR < 0.10	27.755
ENSG00000022567	SLC45A4	protein_coding	3533.37	0.535744	3.01688	0.00255389	0.0169228	FDR < 0.10	42.7007
ENSG00000125347	IRF1	protein_coding	16213	0.535415	4.57688	4.71952e-06	0.000138417	FDR < 0.10	521.305
ENSG00000235750	KIAA0040	protein_coding	5329.78	0.535115	5.51791	3.43053e-08	2.51877e-06	FDR < 0.10	66.1486
ENSG00000167193	CRK	protein_coding	1120.95	0.534933	5.34548	9.01783e-08	5.43087e-06	FDR < 0.10	15.9829
ENSG00000160685	ZBTB7B	protein_coding	6271.34	0.534364	4.56944	4.89018e-06	0.000142154	FDR < 0.10	112.027
ENSG00000186350	RXRA	protein_coding	10140.3	0.532962	3.9966	6.426e-05	0.00103754	FDR < 0.10	135.276
ENSG00000100461	RBM23	protein_coding	3675.46	0.532572	4.50406	6.66671e-06	0.000179536	FDR < 0.10	90.3121
ENSG00000122694	GLIPR2	protein_coding	6968.79	0.532102	5.64275	1.67351e-08	1.38069e-06	FDR < 0.10	210.513
ENSG00000124788	ATXN1	protein_coding	1371.77	0.531831	4.98137	6.31352e-07	2.68994e-05	FDR < 0.10	14.2914
ENSG00000012232	EXTL3	protein_coding	2681.15	0.531727	4.34183	1.41304e-05	0.000322177	FDR < 0.10	21.9129
ENSG00000114316	USP4	protein_coding	3423.07	0.531367	4.65206	3.28629e-06	0.00010219	FDR < 0.10	69.2864
ENSG00000090382	LYZ	protein_coding	81081.4	0.530505	4.7262	2.28762e-06	7.71897e-05	FDR < 0.10	3463.01
ENSG00000105948	TTC26	protein_coding	57.96	0.529394	2.42886	0.0151463	0.0633595	FDR < 0.10	1.12
ENSG00000054523	KIF1B	protein_coding	855.046	0.528778	4.09324	4.25393e-05	0.000767589	FDR < 0.10	4.86214
ENSG00000086730	LAT2	protein_coding	6826.04	0.528329	3.83577	0.00012517	0.00172115	FDR < 0.10	236.859
ENSG00000215301	DDX3X	protein_coding	9979.44	0.528302	5.58275	2.36751e-08	1.85667e-06	FDR < 0.10	159.671
ENSG00000188921	HACD4	protein_coding	1726.16	0.528271	4.68236	2.83594e-06	9.03514e-05	FDR < 0.10	11.0807
ENSG00000163736	PPBP	protein_coding	3678.06	0.52821	4.76568	1.88221e-06	6.53644e-05	FDR < 0.10	340.837
ENSG00000135842	FAM129A	protein_coding	11499.6	0.527818	3.72161	0.000197954	0.00237828	FDR < 0.10	89.1086
ENSG00000111885	MAN1A1	protein_coding	1576.94	0.525814	5.53256	3.15598e-08	2.34611e-06	FDR < 0.10	16.6521
ENSG00000260916	CCPG1	protein_coding	4245.03	0.525591	3.62845	0.000285123	0.00314981	FDR < 0.10	78.8371
ENSG00000183688	RFLNB	protein_coding	5642.45	0.525154	3.21124	0.00132165	0.0103421	FDR < 0.10	83.7729
ENSG00000008294	SPAG9	protein_coding	2323.11	0.525116	4.31782	1.57576e-05	0.000350872	FDR < 0.10	26.0371
ENSG00000204160	ZDHHC18	protein_coding	16197.1	0.524939	3.23303	0.00122486	0.00974496	FDR < 0.10	293.573
ENSG00000155307	SAMSN1	protein_coding	1082.29	0.524773	4.50753	6.55858e-06	0.000177629	FDR < 0.10	32.4407
ENSG00000125744	RTN2	protein_coding	226.981	0.524208	3.70902	0.000208062	0.00247266	FDR < 0.10	8.54071
ENSG00000102981	PARD6A	protein_coding	122.216	0.524117	3.44099	0.00057959	0.00541625	FDR < 0.10	5.75571
ENSG00000128016	ZFP36	protein_coding	9848.9	0.524087	4.2722	1.93555e-05	0.000414806	FDR < 0.10	315.482
ENSG00000111647	UHRF1BP1L	protein_coding	848.99	0.52376	4.39472	1.10914e-05	0.000263845	FDR < 0.10	11.2993
ENSG00000157168	NRG1	protein_coding	82.8108	0.523703	2.42813	0.0151768	0.0634502	FDR < 0.10	3.38857
ENSG00000237441	RGL2	protein_coding	4068.48	0.523518	3.00107	0.00269035	0.0175902	FDR < 0.10	111.765
ENSG00000025039	RRAGD	protein_coding	657.267	0.523414	3.09031	0.00199949	0.0141984	FDR < 0.10	11.7629
ENSG00000113161	HMGCR	protein_coding	1717.85	0.523263	4.13043	3.62085e-05	0.000684192	FDR < 0.10	25.9407
ENSG00000106829	TLE4	protein_coding	2610.46	0.522686	4.045	5.23221e-05	0.000903234	FDR < 0.10	58.0871
ENSG00000073008	PVR	protein_coding	261.836	0.522618	3.65532	0.000256864	0.00289362	FDR < 0.10	4.59286
ENSG00000140044	JDP2	protein_coding	1431.81	0.522508	3.51851	0.000433984	0.00433771	FDR < 0.10	51.0429
ENSG00000119121	TRPM6	protein_coding	441.929	0.522029	2.21431	0.0268073	0.0960823	FDR < 0.10	2.75643
ENSG00000134686	PHC2	protein_coding	12086.9	0.521914	3.44655	0.00056779	0.00533661	FDR < 0.10	279.272
ENSG00000130202	NECTIN2	protein_coding	121.631	0.521891	3.00246	0.00267806	0.0175339	FDR < 0.10	3.70929
ENSG00000174132	FAM174A	protein_coding	571.33	0.521756	3.70197	0.000213933	0.00252863	FDR < 0.10	35.9721
ENSG00000121858	TNFSF10	protein_coding	4699.8	0.521438	5.93835	2.87913e-09	3.0667e-07	FDR < 0.10	165.049
ENSG00000159128	IFNGR2	protein_coding	7379.03	0.520666	4.10836	3.98483e-05	0.000730109	FDR < 0.10	230.529
ENSG00000102908	NFAT5	protein_coding	537.729	0.520435	3.17514	0.00149762	0.0114125	FDR < 0.10	2.33857
ENSG00000005238	FAM214B	protein_coding	2863.18	0.520419	3.73484	0.000187833	0.00228944	FDR < 0.10	57.9907
ENSG00000142089	IFITM3	protein_coding	10508.2	0.520368	4.04194	5.30101e-05	0.000908849	FDR < 0.10	1109.64
ENSG00000118260	CREB1	protein_coding	1586.45	0.520042	5.7268	1.02344e-08	9.073e-07	FDR < 0.10	35.525
ENSG00000138829	FBN2	protein_coding	205.387	0.519869	2.89133	0.00383616	0.0231951	FDR < 0.10	1.105
ENSG00000106546	AHR	protein_coding	649.288	0.519853	3.65206	0.000260144	0.00292596	FDR < 0.10	8.31286
ENSG00000135048	TMEM2	protein_coding	2365.37	0.519735	5.19976	1.9955e-07	1.05488e-05	FDR < 0.10	33.0893
ENSG00000137449	CPEB2	protein_coding	490.603	0.519376	3.83311	0.000126533	0.00172972	FDR < 0.10	6.655
ENSG00000126759	CFP	protein_coding	9782.4	0.518845	4.09101	4.29506e-05	0.000771774	FDR < 0.10	427.409
ENSG00000140022	STON2	protein_coding	64.5714	0.518601	2.67482	0.00747701	0.0381141	FDR < 0.10	1.40929
ENSG00000148200	NR6A1	protein_coding	237.982	0.518217	2.52216	0.0116636	0.0523343	FDR < 0.10	1.9
ENSG00000198736	MSRB1	protein_coding	12307.4	0.518159	3.9586	7.53911e-05	0.00115954	FDR < 0.10	508.799
ENSG00000169902	TPST1	protein_coding	508.474	0.517974	2.46424	0.0137304	0.058922	FDR < 0.10	14.4057
ENSG00000155111	CDK19	protein_coding	1182.72	0.517688	3.992	6.55177e-05	0.00104865	FDR < 0.10	11.5529
ENSG00000148841	ITPRIP	protein_coding	4494.91	0.517652	3.49573	0.000472774	0.00462524	FDR < 0.10	54.5536
ENSG00000154845	PPP4R1	protein_coding	3547.28	0.517572	4.43417	9.24264e-06	0.000227449	FDR < 0.10	60.465
ENSG00000118564	FBXL5	protein_coding	5285.97	0.517431	4.16811	3.0714e-05	0.000600089	FDR < 0.10	118.971
ENSG00000091106	NLRC4	protein_coding	928.689	0.516456	4.88233	1.04839e-06	4.04422e-05	FDR < 0.10	15.91
ENSG00000132589	FLOT2	protein_coding	13103.3	0.516107	4.57429	4.77833e-06	0.00013947	FDR < 0.10	305.243
ENSG00000183486	MX2	protein_coding	5337.99	0.515987	3.9473	7.90378e-05	0.00120524	FDR < 0.10	109.483
ENSG00000175215	CTDSP2	protein_coding	13756	0.515669	4.45488	8.39406e-06	0.00021093	FDR < 0.10	171.026
ENSG00000163041	H3F3A	protein_coding	42595.3	0.515616	4.71429	2.4256e-06	8.05131e-05	FDR < 0.10	2790.6
ENSG00000104093	DMXL2	protein_coding	1323.9	0.515158	4.98839	6.0885e-07	2.60965e-05	FDR < 0.10	17.6657
ENSG00000204424	LY6G6F	protein_coding	131.826	0.515131	3.3361	0.000849612	0.0073405	FDR < 0.10	8.87857
ENSG00000107341	UBE2R2	protein_coding	4604.13	0.515127	4.78101	1.74414e-06	6.17357e-05	FDR < 0.10	60.3857
ENSG00000110880	CORO1C	protein_coding	3840.02	0.5148	4.57293	4.80949e-06	0.000140094	FDR < 0.10	69.25
ENSG00000102524	TNFSF13B	protein_coding	1534.58	0.514557	5.64821	1.62129e-08	1.34539e-06	FDR < 0.10	71.1536
ENSG00000021355	SERPINB1	protein_coding	4304.4	0.514121	7.41085	1.25493e-13	3.98035e-11	FDR < 0.10	117.09
ENSG00000075785	RAB7A	protein_coding	10938.8	0.513851	4.91957	8.67348e-07	3.47743e-05	FDR < 0.10	320.127
ENSG00000175029	CTBP2	protein_coding	1542.64	0.513204	4.06943	4.71285e-05	0.000825356	FDR < 0.10	37.6743
ENSG00000080824	HSP90AA1	protein_coding	9756.84	0.513164	6.04646	1.48064e-09	1.73223e-07	FDR < 0.10	165.341
ENSG00000185033	SEMA4B	protein_coding	3744.35	0.511469	3.57271	0.000353306	0.00369431	FDR < 0.10	68.0364
ENSG00000166439	RNF169	protein_coding	1041.15	0.511302	5.43168	5.58248e-08	3.65499e-06	FDR < 0.10	6.98714
ENSG00000173597	SULT1B1	protein_coding	1711.43	0.511295	3.60195	0.000315844	0.0034051	FDR < 0.10	13.6529
ENSG00000188167	TMPPE	protein_coding	115.164	0.510967	2.67955	0.00737212	0.0377411	FDR < 0.10	1.63786
ENSG00000151458	ANKRD50	protein_coding	126.491	0.510792	3.6129	0.000302792	0.00330251	FDR < 0.10	0.793571
ENSG00000160999	SH2B2	protein_coding	976.977	0.510173	4.22215	2.41987e-05	0.000499115	FDR < 0.10	30.9571
ENSG00000133961	NUMB	protein_coding	8707.22	0.510077	3.84148	0.000122293	0.00168973	FDR < 0.10	192.078
ENSG00000073921	PICALM	protein_coding	8108.03	0.509591	3.92071	8.82874e-05	0.00131127	FDR < 0.10	206.811
ENSG00000118690	ARMC2	protein_coding	54.4219	0.508907	2.43781	0.0147766	0.0622694	FDR < 0.10	2.36643
ENSG00000113448	PDE4D	protein_coding	271.67	0.508588	4.45823	8.26384e-06	0.000208392	FDR < 0.10	2.92214
ENSG00000108405	P2RX1	protein_coding	1555.41	0.508279	2.67381	0.00749958	0.0382018	FDR < 0.10	33.0436
ENSG00000144677	CTDSPL	protein_coding	328.107	0.507857	4.18983	2.79158e-05	0.000555707	FDR < 0.10	5.43714
ENSG00000051620	HEBP2	protein_coding	1951.38	0.507689	4.29685	1.73244e-05	0.000379009	FDR < 0.10	46.8029
ENSG00000167996	FTH1	protein_coding	111068	0.507035	5.77402	7.7403e-09	6.99224e-07	FDR < 0.10	9200.41
ENSG00000100330	MTMR3	protein_coding	5462.13	0.506766	3.60399	0.000313363	0.00338836	FDR < 0.10	44.2007
ENSG00000138449	SLC40A1	protein_coding	2462.43	0.506702	3.66051	0.000251719	0.00285141	FDR < 0.10	39.3807
ENSG00000154330	PGM5	protein_coding	49.5661	0.506063	2.21055	0.0270671	0.0965339	FDR < 0.10	0.880714
ENSG00000102580	DNAJC3	protein_coding	1664.61	0.505995	4.80867	1.5194e-06	5.60245e-05	FDR < 0.10	15.7393
ENSG00000054282	SDCCAG8	protein_coding	227.509	0.505449	4.12279	3.74313e-05	0.000696316	FDR < 0.10	7.83643
ENSG00000007944	MYLIP	protein_coding	1867.12	0.505246	4.73922	2.14544e-06	7.3258e-05	FDR < 0.10	46.265
ENSG00000084764	MAPRE3	protein_coding	188.311	0.505033	2.90795	0.00363806	0.0222191	FDR < 0.10	6.35571
ENSG00000002834	LASP1	protein_coding	15824.3	0.504548	4.51379	6.36789e-06	0.000174117	FDR < 0.10	215.48
ENSG00000148346	LCN2	protein_coding	445.967	0.503813	2.22378	0.0261632	0.0943208	FDR < 0.10	35.8657
ENSG00000108256	NUFIP2	protein_coding	2009.06	0.503685	4.93108	8.17759e-07	3.30648e-05	FDR < 0.10	11.3443
ENSG00000123609	NMI	protein_coding	1921.76	0.502446	5.49811	3.83878e-08	2.75331e-06	FDR < 0.10	71.3386
ENSG00000109466	KLHL2	protein_coding	1231.5	0.502043	3.51086	0.000446659	0.00442412	FDR < 0.10	27.1329
ENSG00000044446	PHKA2	protein_coding	1090.93	0.502022	3.36606	0.000762497	0.0067346	FDR < 0.10	18.0557
ENSG00000157107	FCHO2	protein_coding	496.696	0.501982	3.79568	0.000147237	0.00192977	FDR < 0.10	8.59357
ENSG00000135929	CYP27A1	protein_coding	2522.44	0.501943	3.11515	0.00183852	0.0133611	FDR < 0.10	61.7486
ENSG00000171208	NETO2	protein_coding	90.2668	0.501837	2.49879	0.0124618	0.0548786	FDR < 0.10	2.37429
ENSG00000102393	GLA	protein_coding	471.733	0.501585	4.7044	2.54614e-06	8.33386e-05	FDR < 0.10	23.8571
ENSG00000076662	ICAM3	protein_coding	28244.8	0.500842	3.43652	0.000589249	0.00547193	FDR < 0.10	836.769
ENSG00000123908	AGO2	protein_coding	1586.12	0.500561	3.84939	0.000118413	0.00164728	FDR < 0.10	14.0043
ENSG00000179833	SERTAD2	protein_coding	1186.14	0.500528	5.30753	1.1112e-07	6.39522e-06	FDR < 0.10	12.835
ENSG00000080815	PSEN1	protein_coding	3480.87	0.500158	5.31753	1.05182e-07	6.10272e-06	FDR < 0.10	58.0014
ENSG00000077420	APBB1IP	protein_coding	7767.27	0.499882	3.78935	0.00015104	0.00197236	FDR < 0.10	154.634
ENSG00000168404	MLKL	protein_coding	1209.23	0.499868	3.23515	0.0012158	0.00968363	FDR < 0.10	32.9721
ENSG00000173083	HPSE	protein_coding	970.437	0.499053	5.63364	1.76443e-08	1.43907e-06	FDR < 0.10	15.4957
ENSG00000130052	STARD8	protein_coding	221.073	0.498893	3.34501	0.000822807	0.00715286	FDR < 0.10	2.45
ENSG00000136161	RCBTB2	protein_coding	1117.69	0.497473	3.52504	0.000423411	0.00425588	FDR < 0.10	20.1614
ENSG00000261371	PECAM1	protein_coding	20072.2	0.49744	4.02946	5.59041e-05	0.000943673	FDR < 0.10	261.959
ENSG00000119408	NEK6	protein_coding	1046.34	0.497304	3.12142	0.00179978	0.0131398	FDR < 0.10	22.6771
ENSG00000013441	CLK1	protein_coding	2421.64	0.497058	3.83131	0.000127463	0.00173927	FDR < 0.10	76.5336
ENSG00000160209	PDXK	protein_coding	1987.49	0.496782	5.05331	4.34229e-07	1.95512e-05	FDR < 0.10	43.4107
ENSG00000197442	MAP3K5	protein_coding	2028.56	0.496611	4.10305	4.07738e-05	0.000745153	FDR < 0.10	20.9164
ENSG00000011105	TSPAN9	protein_coding	200.79	0.496426	3.8078	0.000140207	0.00186033	FDR < 0.10	2.72357
ENSG00000127824	TUBA4A	protein_coding	6347.45	0.496319	3.62309	0.000291104	0.00320103	FDR < 0.10	249.659
ENSG00000170836	PPM1D	protein_coding	573.32	0.496064	4.58384	4.56516e-06	0.000134625	FDR < 0.10	11.0864
ENSG00000197943	PLCG2	protein_coding	4640.37	0.495858	3.47673	0.000507562	0.0048982	FDR < 0.10	67.4443
ENSG00000113719	ERGIC1	protein_coding	8747.48	0.495728	3.59983	0.000318427	0.0034198	FDR < 0.10	168.023
ENSG00000197601	FAR1	protein_coding	1580.3	0.49554	4.37127	1.23527e-05	0.000287151	FDR < 0.10	24.7793
ENSG00000197872	FAM49A	protein_coding	2669.95	0.495189	4.61508	3.92947e-06	0.000118324	FDR < 0.10	44.9243
ENSG00000122547	EEPD1	protein_coding	1287.4	0.495037	3.06798	0.0021551	0.0149975	FDR < 0.10	38.2707
ENSG00000266412	NCOA4	protein_coding	26746.5	0.494894	4.53246	5.82994e-06	0.000162521	FDR < 0.10	438.211
ENSG00000020577	SAMD4A	protein_coding	66.9944	0.49446	2.79375	0.00521012	0.0290485	FDR < 0.10	1.86643
ENSG00000132823	OSER1	protein_coding	1850.73	0.494171	4.49268	7.03316e-06	0.00018487	FDR < 0.10	67.39
ENSG00000067992	PDK3	protein_coding	523.602	0.494029	3.42719	0.000609872	0.00563776	FDR < 0.10	15.7229
ENSG00000168214	RBPJ	protein_coding	1906.54	0.493063	4.80999	1.50939e-06	5.58122e-05	FDR < 0.10	34.5807
ENSG00000160710	ADAR	protein_coding	15743.7	0.49186	4.05225	5.07279e-05	0.000879755	FDR < 0.10	145.941
ENSG00000162551	ALPL	protein_coding	8784.19	0.49185	3.63918	0.000273508	0.0030427	FDR < 0.10	196.739
ENSG00000112062	MAPK14	protein_coding	4447.64	0.491623	3.93907	8.17993e-05	0.00123941	FDR < 0.10	64.6121
ENSG00000135823	STX6	protein_coding	1083.51	0.491169	5.61894	1.92135e-08	1.55815e-06	FDR < 0.10	11.8821
ENSG00000167565	SERTAD3	protein_coding	733.151	0.490836	4.13988	3.47484e-05	0.000661286	FDR < 0.10	28.49
ENSG00000168528	SERINC2	protein_coding	103.112	0.490779	2.37173	0.0177049	0.0708841	FDR < 0.10	2.85643
ENSG00000145860	RNF145	protein_coding	2741.12	0.490674	4.91112	9.05581e-07	3.59038e-05	FDR < 0.10	56.7636
ENSG00000113269	RNF130	protein_coding	7968.81	0.490409	4.49948	6.81193e-06	0.000181393	FDR < 0.10	225.358
ENSG00000169247	SH3TC2	protein_coding	43.2611	0.48991	2.23145	0.0256511	0.0928527	FDR < 0.10	0.565714
ENSG00000133703	KRAS	protein_coding	1081.84	0.48954	5.35638	8.49082e-08	5.18138e-06	FDR < 0.10	10.5036
ENSG00000151694	ADAM17	protein_coding	846.229	0.488426	4.69085	2.72074e-06	8.70697e-05	FDR < 0.10	10.4964
ENSG00000164506	STXBP5	protein_coding	1249.23	0.48823	4.12993	3.62876e-05	0.000684192	FDR < 0.10	15.63
ENSG00000165071	TMEM71	protein_coding	3144.33	0.488152	4.34715	1.37916e-05	0.000316475	FDR < 0.10	105.811
ENSG00000109381	ELF2	protein_coding	1187.85	0.487617	5.21637	1.82461e-07	9.75381e-06	FDR < 0.10	27.53
ENSG00000165879	FRAT1	protein_coding	3048.92	0.487105	4.03231	5.52301e-05	0.000937336	FDR < 0.10	65.5143
ENSG00000101972	STAG2	protein_coding	3496.23	0.487081	5.33587	9.50851e-08	5.63133e-06	FDR < 0.10	45.2436
ENSG00000115604	IL18R1	protein_coding	385.306	0.486573	4.46753	7.91264e-06	0.000201785	FDR < 0.10	6.18571
ENSG00000086300	SNX10	protein_coding	2077.36	0.485915	4.20553	2.60471e-05	0.000526586	FDR < 0.10	60.2464
ENSG00000163412	EIF4E3	protein_coding	2111.94	0.485911	5.46377	4.66116e-08	3.12342e-06	FDR < 0.10	35.8021
ENSG00000175137	SH3BP5L	protein_coding	2858.59	0.485621	3.31092	0.000929904	0.00789561	FDR < 0.10	41.4343
ENSG00000048392	RRM2B	protein_coding	1005.8	0.485617	3.89082	9.99071e-05	0.00143747	FDR < 0.10	14.7971
ENSG00000103184	SEC14L5	protein_coding	69.5099	0.485176	2.36837	0.0178668	0.0714122	FDR < 0.10	0.687857
ENSG00000198948	MFAP3L	protein_coding	232.744	0.484989	3.35995	0.000779553	0.00685616	FDR < 0.10	3.61714
ENSG00000070731	ST6GALNAC2	protein_coding	1141.69	0.484265	3.11331	0.00185002	0.013431	FDR < 0.10	37.9743
ENSG00000101493	ZNF516	protein_coding	2610.03	0.484157	2.53448	0.0112615	0.0511408	FDR < 0.10	29.1386
ENSG00000254087	LYN	protein_coding	17947.7	0.483793	4.12257	3.74673e-05	0.000696316	FDR < 0.10	323.395
ENSG00000109332	UBE2D3	protein_coding	7787.23	0.483575	5.36895	7.91942e-08	4.91452e-06	FDR < 0.10	358.048
ENSG00000174718	KIAA1551	protein_coding	10381.7	0.483153	3.69896	0.000216483	0.00254939	FDR < 0.10	187.371
ENSG00000197971	MBP	protein_coding	10526.6	0.482722	5.1103	3.21651e-07	1.53543e-05	FDR < 0.10	149.195
ENSG00000130449	ZSWIM6	protein_coding	699.714	0.48272	3.962	7.43243e-05	0.00114989	FDR < 0.10	6.73429
ENSG00000104973	MED25	protein_coding	4607.48	0.482582	3.00807	0.00262912	0.0172928	FDR < 0.10	128.415
ENSG00000147526	TACC1	protein_coding	3370.41	0.482516	4.90157	9.5075e-07	3.73569e-05	FDR < 0.10	39.4193
ENSG00000099875	MKNK2	protein_coding	11958	0.482365	3.84568	0.000120219	0.00166752	FDR < 0.10	241.006
ENSG00000196182	STK40	protein_coding	10197.5	0.482318	3.41541	0.000636872	0.0058307	FDR < 0.10	162.862
ENSG00000225528	RP3-370M22.8	protein_coding	60.3251	0.481977	2.66142	0.00778117	0.039161	FDR < 0.10	2.66071
ENSG00000148411	NACC2	protein_coding	2058.35	0.481847	3.82233	0.000132199	0.00178175	FDR < 0.10	15.88
ENSG00000065534	MYLK	protein_coding	236.973	0.481584	3.1833	0.00145608	0.0111557	FDR < 0.10	7.20071
ENSG00000132005	RFX1	protein_coding	969.506	0.481504	4.11893	3.80628e-05	0.000705545	FDR < 0.10	13.9693
ENSG00000115935	WIPF1	protein_coding	16395.7	0.481371	4.05806	4.94828e-05	0.000860253	FDR < 0.10	284.767
ENSG00000113532	ST8SIA4	protein_coding	2909	0.481076	4.01239	6.01071e-05	0.000986102	FDR < 0.10	32.9257
ENSG00000184014	DENND5A	protein_coding	6900.75	0.480873	3.73903	0.000184733	0.00225938	FDR < 0.10	136.393
ENSG00000156313	RPGR	protein_coding	318.038	0.480578	3.46447	0.000531276	0.00505865	FDR < 0.10	7.39857
ENSG00000132475	H3F3B	protein_coding	25261.4	0.480463	4.25407	2.09922e-05	0.000443885	FDR < 0.10	2164.73
ENSG00000139083	ETV6	protein_coding	1448.31	0.480378	3.7981	0.000145811	0.0019146	FDR < 0.10	13.1979
ENSG00000066084	DIP2B	protein_coding	2130.16	0.47996	3.87177	0.000108048	0.00152539	FDR < 0.10	13.2979
ENSG00000135912	TTLL4	protein_coding	858.066	0.479774	3.56757	0.000360314	0.00375658	FDR < 0.10	28.4314
ENSG00000197249	SERPINA1	protein_coding	30773.5	0.479711	3.9469	7.91695e-05	0.00120596	FDR < 0.10	1155.32
ENSG00000085733	CTTN	protein_coding	527.963	0.479564	3.42613	0.000612238	0.00565597	FDR < 0.10	10.1907
ENSG00000183723	CMTM4	protein_coding	88.9999	0.479267	2.59986	0.00932605	0.0446381	FDR < 0.10	1.22929
ENSG00000150681	RGS18	protein_coding	3909.63	0.479137	4.62336	3.77573e-06	0.000114176	FDR < 0.10	106.164
ENSG00000179456	ZBTB18	protein_coding	2317.02	0.478492	3.75235	0.000175187	0.00217241	FDR < 0.10	33.1836
ENSG00000140199	SLC12A6	protein_coding	4700.52	0.478044	3.64428	0.000268139	0.00299464	FDR < 0.10	46.54
ENSG00000129450	SIGLEC9	protein_coding	2120.88	0.4777	3.26756	0.00108479	0.00886416	FDR < 0.10	70.9186
ENSG00000108839	ALOX12	protein_coding	263.901	0.477554	3.49151	0.000480293	0.00467614	FDR < 0.10	6.93429
ENSG00000141480	ARRB2	protein_coding	16127	0.477353	4.05021	5.1171e-05	0.000886364	FDR < 0.10	627.239
ENSG00000183023	SLC8A1	protein_coding	703.068	0.477326	3.64201	0.000270518	0.00301867	FDR < 0.10	6.78429
ENSG00000119801	YPEL5	protein_coding	3432.59	0.477279	5.28537	1.2545e-07	7.10534e-06	FDR < 0.10	133.93
ENSG00000204304	PBX2	protein_coding	7460.2	0.476958	3.21837	0.00128919	0.0101325	FDR < 0.10	158.368
ENSG00000148110	MFSD14B	protein_coding	1836.25	0.476874	4.97267	6.60386e-07	2.78567e-05	FDR < 0.10	29.1521
ENSG00000153815	CMIP	protein_coding	3766.75	0.476691	3.59928	0.000319104	0.00342449	FDR < 0.10	54.5436
ENSG00000082701	GSK3B	protein_coding	1895.84	0.476632	4.5312	5.86495e-06	0.000163178	FDR < 0.10	24.3136
ENSG00000135932	CAB39	protein_coding	4505.23	0.476379	4.96494	6.87222e-07	2.84311e-05	FDR < 0.10	63.9829
ENSG00000072110	ACTN1	protein_coding	13795.1	0.476045	2.82968	0.00465941	0.0266122	FDR < 0.10	207.605
ENSG00000189077	TMEM120A	protein_coding	1366.79	0.475905	3.33373	0.000856912	0.00737233	FDR < 0.10	70.2321
ENSG00000068650	ATP11A	protein_coding	2295.12	0.47579	3.11228	0.0018565	0.0134643	FDR < 0.10	17.4436
ENSG00000109272	PF4V1	protein_coding	119.647	0.475703	2.73058	0.00632238	0.0334964	FDR < 0.10	17.1236
ENSG00000109118	PHF12	protein_coding	3399.35	0.475582	3.59457	0.000324925	0.00346611	FDR < 0.10	68.7564
ENSG00000136040	PLXNC1	protein_coding	9898.69	0.474929	3.42555	0.000613556	0.00566448	FDR < 0.10	74.1579
ENSG00000153774	CFDP1	protein_coding	555.266	0.474359	4.65547	3.23249e-06	0.000101624	FDR < 0.10	27.2171
ENSG00000010539	ZNF200	protein_coding	736.509	0.473777	3.57158	0.000354829	0.00370752	FDR < 0.10	15.8657
ENSG00000187605	TET3	protein_coding	1729.15	0.473724	3.0634	0.00218841	0.0151627	FDR < 0.10	7.97857
ENSG00000114784	EIF1B	protein_coding	1008.72	0.473723	3.96767	7.25781e-05	0.00113326	FDR < 0.10	61.4929
ENSG00000158517	NCF1	protein_coding	23284.2	0.473538	2.61442	0.00893789	0.0434061	FDR < 0.10	999.389
ENSG00000182117	NOP10	protein_coding	2714.63	0.472605	5.12731	2.93912e-07	1.43174e-05	FDR < 0.10	357.864
ENSG00000197956	S100A6	protein_coding	14844.3	0.471887	4.27517	1.90994e-05	0.000411169	FDR < 0.10	1524.64
ENSG00000163803	PLB1	protein_coding	575.793	0.471792	3.04548	0.00232306	0.0158116	FDR < 0.10	15.9264
ENSG00000198961	PJA2	protein_coding	3515.05	0.471421	4.8692	1.12053e-06	4.26489e-05	FDR < 0.10	39.4293
ENSG00000143702	CEP170	protein_coding	905.576	0.471309	3.3564	0.000789633	0.00692287	FDR < 0.10	12.1171
ENSG00000164463	CREBRF	protein_coding	1747.3	0.471249	4.03589	5.43953e-05	0.000926473	FDR < 0.10	21.0136
ENSG00000213390	ARHGAP19	protein_coding	988.78	0.470999	4.7174	2.38874e-06	7.95871e-05	FDR < 0.10	10.9486
ENSG00000249437	NAIP	protein_coding	1602.93	0.470974	3.54731	0.000389187	0.00398484	FDR < 0.10	17.4679
ENSG00000188315	C3orf62	protein_coding	944.853	0.470467	3.60779	0.000308818	0.00334936	FDR < 0.10	16.5514
ENSG00000198898	CAPZA2	protein_coding	2540.92	0.470422	4.79017	1.66643e-06	5.97612e-05	FDR < 0.10	121.802
ENSG00000087206	UIMC1	protein_coding	1511.12	0.470404	4.32717	1.51034e-05	0.000341093	FDR < 0.10	51.2107
ENSG00000179241	LDLRAD3	protein_coding	80.1971	0.470091	2.24561	0.0247293	0.0906423	FDR < 0.10	1.185
ENSG00000162702	ZNF281	protein_coding	743.751	0.470004	4.22683	2.37009e-05	0.000490265	FDR < 0.10	10.2114
ENSG00000181625	SLX1B	protein_coding	667.861	0.469423	3.03946	0.00237006	0.0160246	FDR < 0.10	36.5764
ENSG00000010404	IDS	protein_coding	9125.35	0.469171	4.52431	6.05942e-06	0.000167609	FDR < 0.10	125.544
ENSG00000124201	ZNFX1	protein_coding	4463.77	0.468715	4.52288	6.10033e-06	0.000168414	FDR < 0.10	32.5671
ENSG00000162924	REL	protein_coding	569.225	0.468647	4.44088	8.95907e-06	0.000222775	FDR < 0.10	4.805
ENSG00000101150	TPD52L2	protein_coding	5362.57	0.468448	3.92903	8.52878e-05	0.00127735	FDR < 0.10	127.564
ENSG00000103994	ZNF106	protein_coding	2941.13	0.468326	3.8329	0.000126642	0.00172972	FDR < 0.10	17.3564
ENSG00000164713	BRI3	protein_coding	3727.56	0.468291	4.07266	4.64801e-05	0.000818016	FDR < 0.10	324.624
ENSG00000138463	DIRC2	protein_coding	286.943	0.468218	3.79947	0.000145007	0.00190578	FDR < 0.10	6.06143
ENSG00000253729	PRKDC	protein_coding	3260.74	0.467537	4.16698	3.08658e-05	0.00060184	FDR < 0.10	67.4771
ENSG00000147416	ATP6V1B2	protein_coding	16064.7	0.467324	3.47205	0.000516495	0.00496093	FDR < 0.10	318.753
ENSG00000084676	NCOA1	protein_coding	3597.9	0.467198	3.91294	9.11803e-05	0.00134444	FDR < 0.10	28.4921
ENSG00000163739	CXCL1	protein_coding	243.275	0.467048	2.42996	0.0151003	0.0632415	FDR < 0.10	13.915
ENSG00000178789	CD300LB	protein_coding	1897.79	0.466863	3.67708	0.00023592	0.00271555	FDR < 0.10	46.6557
ENSG00000110852	CLEC2B	protein_coding	816.572	0.46684	3.51459	0.000440432	0.00437763	FDR < 0.10	39.5929
ENSG00000101162	TUBB1	protein_coding	4385.85	0.466681	4.06368	4.83052e-05	0.000842861	FDR < 0.10	67.1257
ENSG00000135250	SRPK2	protein_coding	2352.78	0.46658	4.07189	4.66332e-05	0.000818691	FDR < 0.10	46.5143
ENSG00000092020	PPP2R3C	protein_coding	630.561	0.466422	3.80592	0.000141275	0.0018659	FDR < 0.10	27.6514
ENSG00000119139	TJP2	protein_coding	380.326	0.465827	4.52837	5.94392e-06	0.000164733	FDR < 0.10	4.73286
ENSG00000134996	OSTF1	protein_coding	3317.95	0.465635	5.10751	3.26435e-07	1.54995e-05	FDR < 0.10	147.463
ENSG00000180304	OAZ2	protein_coding	7347.19	0.465015	3.89133	9.96975e-05	0.00143591	FDR < 0.10	300.492
ENSG00000105011	ASF1B	protein_coding	1106.76	0.464671	2.76196	0.0057456	0.0312884	FDR < 0.10	31.0271
ENSG00000079739	PGM1	protein_coding	895.712	0.46447	4.64422	3.41366e-06	0.000105234	FDR < 0.10	20.1686
ENSG00000163931	TKT	protein_coding	23847.4	0.46386	3.3312	0.000864733	0.00743067	FDR < 0.10	843.726
ENSG00000140396	NCOA2	protein_coding	2148.45	0.463708	4.02159	5.78071e-05	0.000960512	FDR < 0.10	18.2443
ENSG00000168310	IRF2	protein_coding	3862.7	0.463054	4.38614	1.15379e-05	0.000272199	FDR < 0.10	111.29
ENSG00000129355	CDKN2D	protein_coding	3191.17	0.463035	4.22691	2.36927e-05	0.000490265	FDR < 0.10	149.034
ENSG00000171777	RASGRP4	protein_coding	6002.78	0.462416	2.6818	0.0073228	0.037556	FDR < 0.10	124.051
ENSG00000169413	RNASE6	protein_coding	1580.84	0.462276	3.57764	0.000346714	0.00364139	FDR < 0.10	90.595
ENSG00000197959	DNM3	protein_coding	80.1664	0.46226	2.4116	0.0158825	0.0654043	FDR < 0.10	1.63071
ENSG00000185862	EVI2B	protein_coding	17445.4	0.462056	3.5525	0.000381596	0.00392662	FDR < 0.10	510.994
ENSG00000174099	MSRB3	protein_coding	113.76	0.461894	2.65819	0.00785606	0.039452	FDR < 0.10	2.15214
ENSG00000164609	SLU7	protein_coding	2112.18	0.461197	6.06411	1.32687e-09	1.60495e-07	FDR < 0.10	74.1821
ENSG00000198053	SIRPA	protein_coding	11463.9	0.461189	2.82497	0.00472844	0.0269463	FDR < 0.10	152.392
ENSG00000138185	ENTPD1	protein_coding	1850.75	0.461096	4.18847	2.80844e-05	0.000556849	FDR < 0.10	37.7807
ENSG00000198792	TMEM184B	protein_coding	1951.9	0.461088	3.64801	0.000264282	0.00296316	FDR < 0.10	29.9571
ENSG00000128266	GNAZ	protein_coding	343.981	0.460941	3.5728	0.000353184	0.00369431	FDR < 0.10	5.58214
ENSG00000133317	LGALS12	protein_coding	305.861	0.460763	2.73114	0.00631153	0.0334649	FDR < 0.10	11.1279
ENSG00000134955	SLC37A2	protein_coding	759.025	0.46071	4.4523	8.49551e-06	0.000213105	FDR < 0.10	15.6386
ENSG00000113163	COL4A3BP	protein_coding	1327.07	0.46017	5.06369	4.11229e-07	1.87164e-05	FDR < 0.10	20.2686
ENSG00000033800	PIAS1	protein_coding	2200.14	0.459608	4.37025	1.24103e-05	0.000288019	FDR < 0.10	38.8279
ENSG00000127948	POR	protein_coding	1734.21	0.458545	3.71738	0.000201298	0.00240832	FDR < 0.10	53.4171
ENSG00000241878	PISD	protein_coding	5164.5	0.458536	3.26401	0.00109849	0.00894392	FDR < 0.10	164.671
ENSG00000170909	OSCAR	protein_coding	2589.95	0.458499	3.1157	0.00183507	0.0133428	FDR < 0.10	87.2643
ENSG00000066336	SPI1	protein_coding	23377.5	0.458033	3.24314	0.00118221	0.00945838	FDR < 0.10	1010.39
ENSG00000113749	HRH2	protein_coding	4088.42	0.458014	4.12941	3.63699e-05	0.000684839	FDR < 0.10	57.4836
ENSG00000120694	HSPH1	protein_coding	831.111	0.457899	5.40711	6.40487e-08	4.11787e-06	FDR < 0.10	16.2957
ENSG00000176386	CDC26	protein_coding	608.165	0.457584	5.54366	2.96216e-08	2.23698e-06	FDR < 0.10	44.1864
ENSG00000256235	SMIM3	protein_coding	625.844	0.45751	3.74622	0.000179516	0.00220882	FDR < 0.10	14.8464
ENSG00000182831	C16orf72	protein_coding	4590.1	0.45743	3.94993	7.81729e-05	0.00119393	FDR < 0.10	31.3814
ENSG00000146112	PPP1R18	protein_coding	17135.9	0.456894	3.78407	0.000154285	0.00200192	FDR < 0.10	448.603
ENSG00000198743	SLC5A3	protein_coding	290.506	0.456475	3.8863	0.000101783	0.00145712	FDR < 0.10	1.31214
ENSG00000134815	DHX34	protein_coding	2312.08	0.45613	2.71727	0.00658233	0.0345669	FDR < 0.10	39.0443
ENSG00000153922	CHD1	protein_coding	1250.92	0.45608	5.09337	3.51762e-07	1.64075e-05	FDR < 0.10	22.2114
ENSG00000131669	NINJ1	protein_coding	9381.99	0.455922	3.03554	0.00240105	0.0161652	FDR < 0.10	434.993
ENSG00000175471	MCTP1	protein_coding	525.005	0.455009	4.44027	8.98481e-06	0.000223026	FDR < 0.10	11.6014
ENSG00000155926	SLA	protein_coding	12507.8	0.454778	3.86765	0.000109889	0.00154679	FDR < 0.10	216.871
ENSG00000189159	HN1	protein_coding	2911.09	0.454524	4.80497	1.54773e-06	5.62187e-05	FDR < 0.10	270.072
ENSG00000162645	GBP2	protein_coding	8248.01	0.454483	3.97917	6.91576e-05	0.00109191	FDR < 0.10	213.405
ENSG00000026025	VIM	protein_coding	32710.6	0.454241	6.01076	1.8466e-09	2.09101e-07	FDR < 0.10	1004.02
ENSG00000109854	HTATIP2	protein_coding	1154.97	0.453949	4.71711	2.39213e-06	7.95871e-05	FDR < 0.10	58.6621
ENSG00000083168	KAT6A	protein_coding	3679.3	0.453645	4.69641	2.6477e-06	8.53087e-05	FDR < 0.10	21.3743
ENSG00000197903	HIST1H2BK	protein_coding	563.58	0.453565	2.66661	0.00766211	0.0387521	FDR < 0.10	131.516
ENSG00000221869	CEBPD	protein_coding	7679.7	0.453563	3.38317	0.000716535	0.00640786	FDR < 0.10	195.641
ENSG00000168016	TRANK1	protein_coding	5861.82	0.453394	3.32566	0.000882101	0.00755716	FDR < 0.10	38.18
ENSG00000205269	TMEM170B	protein_coding	640.099	0.45316	3.69749	0.000217741	0.00255998	FDR < 0.10	4.03071
ENSG00000145391	SETD7	protein_coding	387.666	0.453025	3.46678	0.000526729	0.00503895	FDR < 0.10	3.03857
ENSG00000133808	MICALCL	protein_coding	118.949	0.452951	2.6813	0.00733364	0.0375981	FDR < 0.10	4.31286
ENSG00000169967	MAP3K2	protein_coding	2601.05	0.452825	3.46478	0.000530657	0.00505865	FDR < 0.10	21.1571
ENSG00000186318	BACE1	protein_coding	100.347	0.452756	2.43179	0.0150243	0.0630422	FDR < 0.10	1.44214
ENSG00000123066	MED13L	protein_coding	4160.07	0.452436	3.72979	0.000191639	0.00232591	FDR < 0.10	24.7421
ENSG00000182197	EXT1	protein_coding	263.675	0.452385	4.08934	4.32593e-05	0.000774643	FDR < 0.10	5.90429
ENSG00000128487	SPECC1	protein_coding	696.24	0.452309	3.79667	0.000146656	0.00192391	FDR < 0.10	13.1379
ENSG00000113580	NR3C1	protein_coding	2966.84	0.452002	5.2366	1.63562e-07	8.94451e-06	FDR < 0.10	31.435
ENSG00000035862	TIMP2	protein_coding	7031.22	0.451084	2.86894	0.00411844	0.0243687	FDR < 0.10	108.911
ENSG00000196782	MAML3	protein_coding	745.184	0.450892	3.66879	0.0002437	0.00278044	FDR < 0.10	5.73429
ENSG00000176463	SLCO3A1	protein_coding	2740.48	0.45063	3.74845	0.000177929	0.00219687	FDR < 0.10	53.6243
ENSG00000132357	CARD6	protein_coding	632.804	0.450329	3.23857	0.00120129	0.00959489	FDR < 0.10	8.01143
ENSG00000168300	PCMTD1	protein_coding	1335.5	0.450306	4.42679	9.56467e-06	0.000233362	FDR < 0.10	33.3014
ENSG00000110799	VWF	protein_coding	238.463	0.450257	3.03021	0.00244382	0.0163682	FDR < 0.10	2.46143
ENSG00000173210	ABLIM3	protein_coding	393.776	0.450143	3.54266	0.000396108	0.00404409	FDR < 0.10	5.42071
ENSG00000158050	DUSP2	protein_coding	673.679	0.450106	2.67297	0.00751827	0.0382834	FDR < 0.10	23.0693
ENSG00000133816	MICAL2	protein_coding	3416.45	0.449993	3.98882	6.64037e-05	0.00105661	FDR < 0.10	41.2007
ENSG00000143207	RFWD2	protein_coding	2275.17	0.449808	4.0568	4.9749e-05	0.00086383	FDR < 0.10	63.3971
ENSG00000088832	FKBP1A	protein_coding	5551.52	0.44938	4.49675	6.89992e-06	0.000182063	FDR < 0.10	301.634
ENSG00000170871	KIAA0232	protein_coding	2233.79	0.449291	3.55587	0.000376734	0.00388802	FDR < 0.10	15.6121
ENSG00000198900	TOP1	protein_coding	2603.16	0.44926	4.88008	1.06044e-06	4.07968e-05	FDR < 0.10	37.39
ENSG00000163545	NUAK2	protein_coding	4687.15	0.448991	3.1624	0.00156474	0.0118497	FDR < 0.10	73.25
ENSG00000135709	KIAA0513	protein_coding	4505.31	0.448849	3.32395	0.000887506	0.0075898	FDR < 0.10	34.705
ENSG00000160211	G6PD	protein_coding	5838.99	0.448777	2.93979	0.00328435	0.020494	FDR < 0.10	171.657
ENSG00000143797	MBOAT2	protein_coding	563.65	0.44866	3.15645	0.00159704	0.0120351	FDR < 0.10	14.965
ENSG00000024048	UBR2	protein_coding	4340.04	0.44866	3.44558	0.00056984	0.00534735	FDR < 0.10	28.95
ENSG00000108349	CASC3	protein_coding	5935.64	0.448407	3.62796	0.000285668	0.00315339	FDR < 0.10	85.2814
ENSG00000165886	UBTD1	protein_coding	495.393	0.447884	2.86974	0.0041081	0.0243585	FDR < 0.10	16.4593
ENSG00000119862	LGALSL	protein_coding	390.132	0.447782	2.61668	0.00887908	0.043191	FDR < 0.10	6.55429
ENSG00000106066	CPVL	protein_coding	2978.54	0.447562	3.53848	0.000402444	0.00409414	FDR < 0.10	91.7571
ENSG00000165092	ALDH1A1	protein_coding	562.1	0.447381	3.18771	0.00143404	0.011034	FDR < 0.10	15.5929
ENSG00000164512	ANKRD55	protein_coding	136.107	0.447191	2.67844	0.00739665	0.0378298	FDR < 0.10	4.70929
ENSG00000158869	FCER1G	protein_coding	5998.85	0.446924	5.43779	5.39454e-08	3.56464e-06	FDR < 0.10	733.752
ENSG00000170006	TMEM154	protein_coding	7928.89	0.446787	3.08736	0.00201945	0.0142974	FDR < 0.10	53.6421
ENSG00000178904	DPY19L3	protein_coding	334.594	0.446687	2.60083	0.00929979	0.0445572	FDR < 0.10	4.14571
ENSG00000028137	TNFRSF1B	protein_coding	24837.5	0.44654	4.15272	3.28543e-05	0.000634546	FDR < 0.10	369.94
ENSG00000090376	IRAK3	protein_coding	1592.62	0.446352	3.46178	0.000536613	0.00509586	FDR < 0.10	10.0036
ENSG00000170325	PRDM10	protein_coding	310.402	0.445868	3.71497	0.000203226	0.0024285	FDR < 0.10	2.77071
ENSG00000164938	TP53INP1	protein_coding	2002.45	0.445821	3.13696	0.00170708	0.0126375	FDR < 0.10	18.7521
ENSG00000205133	TRIQK	protein_coding	244.917	0.44575	3.4197	0.000626894	0.00575412	FDR < 0.10	6.35429
ENSG00000160746	ANO10	protein_coding	420.12	0.445743	3.56005	0.000370789	0.00384055	FDR < 0.10	8.89714
ENSG00000064763	FAR2	protein_coding	519.923	0.445543	3.35015	0.000807682	0.00705079	FDR < 0.10	14.1607
ENSG00000039319	ZFYVE16	protein_coding	696.634	0.445439	3.52443	0.000424395	0.00426177	FDR < 0.10	9.98571
ENSG00000163735	CXCL5	protein_coding	189.928	0.445106	3.06211	0.00219784	0.0152186	FDR < 0.10	4.10357
ENSG00000111275	ALDH2	protein_coding	1906.49	0.444697	4.00189	6.28387e-05	0.00101804	FDR < 0.10	60.4807
ENSG00000265972	TXNIP	protein_coding	105261	0.444179	4.28569	1.82171e-05	0.000394557	FDR < 0.10	2055
ENSG00000142599	RERE	protein_coding	5403.91	0.443963	2.87229	0.00407513	0.024225	FDR < 0.10	67.7614
ENSG00000067900	ROCK1	protein_coding	3002.1	0.443867	4.41972	9.88296e-06	0.000240306	FDR < 0.10	24.8314
ENSG00000128335	APOL2	protein_coding	2349.77	0.44386	3.52431	0.000424594	0.00426177	FDR < 0.10	66.1621
ENSG00000115607	IL18RAP	protein_coding	1399.92	0.443685	3.05346	0.00226221	0.0154861	FDR < 0.10	35.4036
ENSG00000132581	SDF2	protein_coding	1263.79	0.443284	5.29793	1.17125e-07	6.68691e-06	FDR < 0.10	69.935
ENSG00000140526	ABHD2	protein_coding	8361.37	0.443193	3.07838	0.00208129	0.0146048	FDR < 0.10	54.9743
ENSG00000073331	ALPK1	protein_coding	1599.14	0.443137	2.57161	0.0101227	0.0473245	FDR < 0.10	24.9607
ENSG00000100647	SUSD6	protein_coding	6464.55	0.443079	3.20773	0.00133786	0.0104175	FDR < 0.10	66.5379
ENSG00000091039	OSBPL8	protein_coding	3401.08	0.44305	4.32175	1.54799e-05	0.000346757	FDR < 0.10	41.0586
ENSG00000136167	LCP1	protein_coding	78667	0.442864	3.899	9.65896e-05	0.00140301	FDR < 0.10	1123.11
ENSG00000177105	RHOG	protein_coding	11711.9	0.44284	3.75744	0.000171661	0.00215489	FDR < 0.10	522.805
ENSG00000077514	POLD3	protein_coding	462.242	0.442751	4.42765	9.52641e-06	0.000233225	FDR < 0.10	7.86143
ENSG00000111859	NEDD9	protein_coding	3609.97	0.442645	3.7904	0.000150405	0.00196587	FDR < 0.10	59.0907
ENSG00000185728	YTHDF3	protein_coding	1309.53	0.441684	4.88365	1.04138e-06	4.03023e-05	FDR < 0.10	17.7936
ENSG00000114331	ACAP2	protein_coding	2746.33	0.441663	4.48075	7.43819e-06	0.000193183	FDR < 0.10	23.5821
ENSG00000175182	FAM131A	protein_coding	470.014	0.441305	3.19711	0.0013881	0.010721	FDR < 0.10	13.3893
ENSG00000116337	AMPD2	protein_coding	7748.46	0.441273	3.05714	0.00223459	0.0153774	FDR < 0.10	193.666
ENSG00000213719	CLIC1	protein_coding	14902.8	0.440929	6.00875	1.86965e-09	2.09101e-07	FDR < 0.10	753.302
ENSG00000120727	PAIP2	protein_coding	3790.78	0.440903	5.90826	3.4574e-09	3.5759e-07	FDR < 0.10	172.809
ENSG00000139178	C1RL	protein_coding	1782.56	0.440493	3.07554	0.00210122	0.0146934	FDR < 0.10	42.9364
ENSG00000105856	HBP1	protein_coding	3673.15	0.440103	4.02173	5.77721e-05	0.000960512	FDR < 0.10	93.71
ENSG00000100485	SOS2	protein_coding	1631.91	0.439177	3.5891	0.000331816	0.00351597	FDR < 0.10	16.2736
ENSG00000105767	CADM4	protein_coding	154.476	0.438915	2.41714	0.0156431	0.0647873	FDR < 0.10	4.10286
ENSG00000078618	NRDC	protein_coding	3846.47	0.438712	3.38715	0.000706232	0.00634512	FDR < 0.10	94.2879
ENSG00000273559	CWC25	protein_coding	1055.16	0.437737	3.30471	0.000950738	0.00804857	FDR < 0.10	24.8636
ENSG00000157450	RNF111	protein_coding	1265.82	0.437707	4.04076	5.32786e-05	0.000911804	FDR < 0.10	15.9107
ENSG00000188641	DPYD	protein_coding	2251.35	0.437268	4.61754	3.88318e-06	0.000117177	FDR < 0.10	28.9014
ENSG00000145332	KLHL8	protein_coding	671.251	0.437099	3.70401	0.00021222	0.00251162	FDR < 0.10	10.6893
ENSG00000163513	TGFBR2	protein_coding	9479.38	0.437082	4.11329	3.90056e-05	0.000718357	FDR < 0.10	109.557
ENSG00000142166	IFNAR1	protein_coding	2648.06	0.437072	4.27346	1.92459e-05	0.0004137	FDR < 0.10	32.7157
ENSG00000161911	TREML1	protein_coding	656.904	0.43677	4.38289	1.17114e-05	0.000275382	FDR < 0.10	34.1264
ENSG00000137767	SQRDL	protein_coding	3407.59	0.436383	4.23878	2.2474e-05	0.000469651	FDR < 0.10	103.159
ENSG00000100439	ABHD4	protein_coding	1666.34	0.436378	3.26254	0.00110419	0.00896987	FDR < 0.10	29.1879
ENSG00000140995	DEF8	protein_coding	5472.22	0.435877	2.64254	0.00822871	0.0407948	FDR < 0.10	136.362
ENSG00000140105	WARS	protein_coding	5555.33	0.43575	4.97559	6.50484e-07	2.755e-05	FDR < 0.10	175.107
ENSG00000135334	AKIRIN2	protein_coding	2101.86	0.435728	3.6449	0.000267499	0.00298983	FDR < 0.10	73.895
ENSG00000001167	NFYA	protein_coding	1058.33	0.43556	4.34191	1.4125e-05	0.000322177	FDR < 0.10	18.1507
ENSG00000197321	SVIL	protein_coding	2657.21	0.435507	2.96702	0.00300704	0.0192033	FDR < 0.10	22.9857
ENSG00000008083	JARID2	protein_coding	2619.91	0.435456	3.38582	0.000709649	0.00635833	FDR < 0.10	24.5379
ENSG00000135655	USP15	protein_coding	4556.76	0.43537	3.48262	0.000496524	0.00480467	FDR < 0.10	121.441
ENSG00000103154	NECAB2	protein_coding	342.147	0.435211	2.25808	0.0239409	0.0885483	FDR < 0.10	23.8229
ENSG00000146094	DOK3	protein_coding	7771.05	0.43458	2.35439	0.018553	0.0731107	FDR < 0.10	236.393
ENSG00000196850	PPTC7	protein_coding	1561.95	0.434559	4.5467	5.44941e-06	0.000154019	FDR < 0.10	16.7064
ENSG00000090060	PAPOLA	protein_coding	3486.16	0.434388	5.79203	6.95409e-09	6.48373e-07	FDR < 0.10	62.625
ENSG00000015285	WAS	protein_coding	11395.6	0.434175	3.07823	0.00208231	0.0146048	FDR < 0.10	399.959
ENSG00000112242	E2F3	protein_coding	1380.67	0.433982	3.12003	0.00180832	0.0131819	FDR < 0.10	16.2457
ENSG00000139496	NUP58	protein_coding	1028.23	0.433918	3.21619	0.00129903	0.0101963	FDR < 0.10	13.8229
ENSG00000131042	LILRB2	protein_coding	7386.28	0.433006	3.07043	0.0021375	0.0149186	FDR < 0.10	167.239
ENSG00000093000	NUP50	protein_coding	3907.45	0.432339	3.72171	0.000197882	0.00237828	FDR < 0.10	47.2864
ENSG00000204482	LST1	protein_coding	10588.1	0.432154	3.36123	0.000775953	0.00683232	FDR < 0.10	1096.5
ENSG00000081320	STK17B	protein_coding	5383.61	0.431673	4.75507	1.98376e-06	6.82268e-05	FDR < 0.10	54.9929
ENSG00000198695	MT-ND6	protein_coding	530.763	0.431501	3.29906	0.000970075	0.00815145	FDR < 0.10	75.2529
ENSG00000163568	AIM2	protein_coding	255.052	0.4314	2.85919	0.00424718	0.0248953	FDR < 0.10	9.91214
ENSG00000217555	CKLF	protein_coding	1733.79	0.431352	3.43987	0.000582	0.00542579	FDR < 0.10	201.361
ENSG00000108061	SHOC2	protein_coding	1670.4	0.431341	4.09205	4.27582e-05	0.000769593	FDR < 0.10	30.9543
ENSG00000055332	EIF2AK2	protein_coding	976.466	0.431142	3.61158	0.000304335	0.00331081	FDR < 0.10	7.32214
ENSG00000075151	EIF4G3	protein_coding	971.825	0.431136	4.18887	2.80343e-05	0.000556849	FDR < 0.10	10.8614
ENSG00000142347	MYO1F	protein_coding	36569.1	0.431119	2.77954	0.00544367	0.030092	FDR < 0.10	637.205
ENSG00000155629	PIK3AP1	protein_coding	4444.65	0.4311	5.12775	2.93219e-07	1.43174e-05	FDR < 0.10	55.8243
ENSG00000131626	PPFIA1	protein_coding	1327.74	0.430782	3.3145	0.00091808	0.00780915	FDR < 0.10	18.8386
ENSG00000204634	TBC1D8	protein_coding	472.118	0.430737	3.92227	8.7717e-05	0.00130687	FDR < 0.10	7.77
ENSG00000116044	NFE2L2	protein_coding	2284.53	0.430587	4.17772	2.94448e-05	0.000578878	FDR < 0.10	55.1179
ENSG00000076685	NT5C2	protein_coding	2743.81	0.430553	3.23076	0.00123462	0.00979528	FDR < 0.10	62.41
ENSG00000090238	YPEL3	protein_coding	14454.3	0.430479	2.9774	0.00290707	0.018682	FDR < 0.10	979.031
ENSG00000102921	N4BP1	protein_coding	3918.83	0.430375	3.45155	0.000557383	0.00525811	FDR < 0.10	66.4743
ENSG00000175711	B3GNTL1	protein_coding	366.788	0.430366	2.20209	0.027659	0.0980327	FDR < 0.10	16.2636
ENSG00000139505	MTMR6	protein_coding	1043.15	0.429862	3.90212	9.53521e-05	0.00139015	FDR < 0.10	9.88
ENSG00000177156	TALDO1	protein_coding	20532.1	0.429501	3.07002	0.00214043	0.0149318	FDR < 0.10	918.089
ENSG00000027869	SH2D2A	protein_coding	682.555	0.429482	4.05807	4.9479e-05	0.000860253	FDR < 0.10	24.7957
ENSG00000134905	CARS2	protein_coding	1795.29	0.429283	2.53178	0.0113486	0.0514056	FDR < 0.10	85.13
ENSG00000130522	JUND	protein_coding	4243.01	0.429218	4.25545	2.08633e-05	0.000442468	FDR < 0.10	182.661
ENSG00000121297	TSHZ3	protein_coding	411.246	0.42884	2.68577	0.00723623	0.0371788	FDR < 0.10	4.55429
ENSG00000030582	GRN	protein_coding	17289.9	0.428785	4.02851	5.61324e-05	0.000943673	FDR < 0.10	533.595
ENSG00000172354	GNB2	protein_coding	11836.2	0.428628	3.16181	0.00156794	0.0118497	FDR < 0.10	503.609
ENSG00000151715	TMEM45B	protein_coding	190.479	0.428605	2.91466	0.00356072	0.0218684	FDR < 0.10	6.36
ENSG00000082996	RNF13	protein_coding	2759.04	0.428553	4.51059	6.46471e-06	0.000175754	FDR < 0.10	87.185
ENSG00000123700	KCNJ2	protein_coding	1410.65	0.428169	2.68442	0.00726553	0.0373025	FDR < 0.10	14.2193
ENSG00000124491	F13A1	protein_coding	4421.84	0.428132	4.69984	2.60364e-06	8.42671e-05	FDR < 0.10	62.9164
ENSG00000118308	LRMP	protein_coding	4219.52	0.428093	3.60078	0.000317264	0.00341244	FDR < 0.10	124.561
ENSG00000143669	LYST	protein_coding	5540.76	0.428056	3.08	0.00206999	0.0145542	FDR < 0.10	49.6493
ENSG00000164674	SYTL3	protein_coding	1199.25	0.427941	3.79953	0.00014497	0.00190578	FDR < 0.10	26.3786
ENSG00000184232	OAF	protein_coding	353.14	0.427911	3.01544	0.00256608	0.016972	FDR < 0.10	7.89929
ENSG00000100596	SPTLC2	protein_coding	2289.21	0.427731	4.6534	3.26513e-06	0.00010219	FDR < 0.10	18.5464
ENSG00000254470	AP5B1	protein_coding	3370.3	0.427611	2.5935	0.00950047	0.0452755	FDR < 0.10	37.145
ENSG00000185591	SP1	protein_coding	5069.67	0.427496	3.75104	0.000176104	0.00218188	FDR < 0.10	38.1993
ENSG00000169228	RAB24	protein_coding	3262.77	0.426871	3.00884	0.00262244	0.0172569	FDR < 0.10	134.113
ENSG00000101160	CTSZ	protein_coding	8303.81	0.426748	4.50486	6.64164e-06	0.000179536	FDR < 0.10	332.634
ENSG00000188997	KCTD21	protein_coding	565.114	0.426701	3.6171	0.000297925	0.00326346	FDR < 0.10	9.21571
ENSG00000181631	P2RY13	protein_coding	5993.17	0.426521	3.59291	0.000327004	0.00348048	FDR < 0.10	117.601
ENSG00000065154	OAT	protein_coding	834.45	0.426251	5.67028	1.42566e-08	1.20812e-06	FDR < 0.10	23.625
ENSG00000033627	ATP6V0A1	protein_coding	1602.7	0.42614	2.28041	0.0225836	0.085004	FDR < 0.10	32.5093
ENSG00000112531	QKI	protein_coding	2754.93	0.42614	4.67422	2.95071e-06	9.37552e-05	FDR < 0.10	73.6014
ENSG00000100034	PPM1F	protein_coding	6542.6	0.425996	2.99567	0.00273843	0.0178229	FDR < 0.10	74.0757
ENSG00000065615	CYB5R4	protein_coding	1924.63	0.425831	3.66011	0.000252105	0.00285353	FDR < 0.10	61.535
ENSG00000165113	GKAP1	protein_coding	58.9348	0.425566	2.20078	0.0277519	0.0982642	FDR < 0.10	2.16286
ENSG00000127947	PTPN12	protein_coding	2422.47	0.425449	3.8364	0.000124853	0.00171845	FDR < 0.10	46.7136
ENSG00000115165	CYTIP	protein_coding	5330.84	0.425019	4.23328	2.30306e-05	0.000477785	FDR < 0.10	131.916
ENSG00000238083	LRRC37A2	protein_coding	359.816	0.424974	3.81657	0.000135321	0.00181084	FDR < 0.10	5.89357
ENSG00000072694	FCGR2B	protein_coding	1745.16	0.424752	3.78232	0.000155372	0.00201017	FDR < 0.10	56.9421
ENSG00000164430	MB21D1	protein_coding	263.174	0.424404	3.49607	0.000472169	0.00462524	FDR < 0.10	4.54214
ENSG00000243927	MRPS6	protein_coding	801.652	0.423557	4.47745	7.55399e-06	0.000194969	FDR < 0.10	49.0264
ENSG00000163346	PBXIP1	protein_coding	10706.3	0.423541	4.80494	1.54795e-06	5.62187e-05	FDR < 0.10	201.578
ENSG00000119471	HSDL2	protein_coding	1507.03	0.423254	3.38989	0.000699202	0.00629635	FDR < 0.10	27.1121
ENSG00000065559	MAP2K4	protein_coding	1588.97	0.423027	4.50159	6.74462e-06	0.000180273	FDR < 0.10	23.9157
ENSG00000143363	PRUNE1	protein_coding	1002.22	0.422955	4.78198	1.73579e-06	6.16291e-05	FDR < 0.10	23.1436
ENSG00000130038	CRACR2A	protein_coding	366.3	0.422913	3.12401	0.00178407	0.0130584	FDR < 0.10	6.93857
ENSG00000154813	DPH3	protein_coding	532.76	0.42247	4.03454	5.47091e-05	0.000930707	FDR < 0.10	10.6057
ENSG00000133246	PRAM1	protein_coding	3314.66	0.422383	2.55756	0.010541	0.0487848	FDR < 0.10	97.2693
ENSG00000162636	FAM102B	protein_coding	361.619	0.421743	3.36294	0.000771168	0.0067989	FDR < 0.10	3.45786
ENSG00000167034	NKX3-1	protein_coding	202.707	0.42164	2.51617	0.0118639	0.0529333	FDR < 0.10	4.05214
ENSG00000143595	AQP10	protein_coding	125.32	0.42156	2.64078	0.00827149	0.0409216	FDR < 0.10	4.11286
ENSG00000110080	ST3GAL4	protein_coding	857.548	0.421529	3.2715	0.00106978	0.00878508	FDR < 0.10	29.1757
ENSG00000137076	TLN1	protein_coding	27256.6	0.421472	3.63782	0.000274959	0.00305645	FDR < 0.10	375.489
ENSG00000044115	CTNNA1	protein_coding	2031.22	0.42136	5.02821	4.95074e-07	2.16755e-05	FDR < 0.10	37.8729
ENSG00000168995	SIGLEC7	protein_coding	1036.82	0.421312	3.26891	0.00107963	0.00884084	FDR < 0.10	36.51
ENSG00000130766	SESN2	protein_coding	607.283	0.421116	3.48878	0.000485233	0.00471459	FDR < 0.10	9.49143
ENSG00000137161	CNPY3	protein_coding	8026.57	0.420846	3.49196	0.000479493	0.00467153	FDR < 0.10	267.651
ENSG00000135828	RNASEL	protein_coding	1532.42	0.420733	3.64142	0.000271144	0.00302039	FDR < 0.10	19.3343
ENSG00000100503	NIN	protein_coding	4206.82	0.420712	3.7746	0.000160266	0.00205524	FDR < 0.10	30.525
ENSG00000081237	PTPRC	protein_coding	40732.4	0.420072	6.20496	5.47109e-10	7.75701e-08	FDR < 0.10	537.938
ENSG00000132694	ARHGEF11	protein_coding	2491.25	0.419859	2.87192	0.00407988	0.0242432	FDR < 0.10	32.0464
ENSG00000022277	RTFDC1	protein_coding	4840.47	0.419338	3.38522	0.000711208	0.00636431	FDR < 0.10	161.511
ENSG00000087157	PGS1	protein_coding	1472.73	0.419303	2.73778	0.00618548	0.0329546	FDR < 0.10	41.91
ENSG00000152207	CYSLTR2	protein_coding	236.831	0.419253	3.78214	0.000155484	0.00201017	FDR < 0.10	3.21857
ENSG00000161642	ZNF385A	protein_coding	2114.38	0.419023	3.76469	0.000166755	0.00211335	FDR < 0.10	54.5693
ENSG00000057252	SOAT1	protein_coding	1042.19	0.419018	3.69285	0.000221754	0.00259673	FDR < 0.10	15.7964
ENSG00000187554	TLR5	protein_coding	346.32	0.418975	3.23265	0.00122647	0.0097523	FDR < 0.10	5.975
ENSG00000095951	HIVEP1	protein_coding	530.924	0.418802	3.70188	0.000214011	0.00252863	FDR < 0.10	7.06929
ENSG00000130724	CHMP2A	protein_coding	3999.64	0.418645	3.56471	0.000364259	0.00378389	FDR < 0.10	277.335
ENSG00000100354	TNRC6B	protein_coding	1504.22	0.418366	3.55013	0.000385044	0.00395092	FDR < 0.10	6.81714
ENSG00000125304	TM9SF2	protein_coding	4637.74	0.418346	3.69852	0.000216858	0.0025517	FDR < 0.10	76.0743
ENSG00000062282	DGAT2	protein_coding	5796.97	0.418157	2.61375	0.00895553	0.0434326	FDR < 0.10	129.774
ENSG00000197629	MPEG1	protein_coding	14736.8	0.418087	4.27276	1.93069e-05	0.000414386	FDR < 0.10	176.965
ENSG00000254415	SIGLEC14	protein_coding	1917.96	0.418002	2.5174	0.0118225	0.0527982	FDR < 0.10	54.0664
ENSG00000089159	PXN	protein_coding	16131.1	0.417752	3.19919	0.00137816	0.0106673	FDR < 0.10	243.721
ENSG00000052749	RRP12	protein_coding	1704.61	0.417746	3.33575	0.000850694	0.00734096	FDR < 0.10	30.8886
ENSG00000168497	SDPR	protein_coding	2450.69	0.417485	3.97225	7.11981e-05	0.00111794	FDR < 0.10	40.9814
ENSG00000101558	VAPA	protein_coding	2543.39	0.417388	4.31135	1.62264e-05	0.00035907	FDR < 0.10	138.274
ENSG00000145979	TBC1D7	protein_coding	174.336	0.417199	3.09066	0.00199711	0.0141956	FDR < 0.10	9.86643
ENSG00000105967	TFEC	protein_coding	218.345	0.417164	2.36125	0.0182135	0.0721974	FDR < 0.10	2.83
ENSG00000109586	GALNT7	protein_coding	547.694	0.416937	3.83996	0.000123055	0.00169533	FDR < 0.10	9.61071
ENSG00000160584	SIK3	protein_coding	2187.23	0.416849	3.70013	0.000215491	0.0025398	FDR < 0.10	23.3143
ENSG00000182093	WRB	protein_coding	241.356	0.416748	2.84389	0.00445665	0.0258157	FDR < 0.10	14.4343
ENSG00000152213	ARL11	protein_coding	958.473	0.416731	3.39369	0.000689585	0.00622545	FDR < 0.10	16.8314
ENSG00000138594	TMOD3	protein_coding	1618.03	0.416623	5.05382	4.33056e-07	1.95512e-05	FDR < 0.10	13.6107
ENSG00000116406	EDEM3	protein_coding	941.812	0.416488	3.67548	0.000237403	0.00272748	FDR < 0.10	9.87143
ENSG00000153179	RASSF3	protein_coding	7505.63	0.416483	3.7231	0.000196791	0.00237388	FDR < 0.10	151.229
ENSG00000135205	CCDC146	protein_coding	228.874	0.415939	2.89099	0.00384027	0.0231951	FDR < 0.10	6.60714
ENSG00000170852	KBTBD2	protein_coding	1668.91	0.415856	3.60906	0.000307309	0.00333806	FDR < 0.10	26.4029
ENSG00000080371	RAB21	protein_coding	1329.22	0.415503	5.46648	4.5906e-08	3.12008e-06	FDR < 0.10	34.1871
ENSG00000128944	KNSTRN	protein_coding	148.037	0.41533	3.0223	0.00250864	0.0167161	FDR < 0.10	6.015
ENSG00000167261	DPEP2	protein_coding	4818.83	0.4153	2.59021	0.00959182	0.0455891	FDR < 0.10	206.946
ENSG00000120217	CD274	protein_coding	178.233	0.414876	2.58761	0.00966448	0.0458581	FDR < 0.10	2.98143
ENSG00000117139	KDM5B	protein_coding	1053.19	0.414832	3.10377	0.00191073	0.0137441	FDR < 0.10	9.99429
ENSG00000177663	IL17RA	protein_coding	12344.5	0.414648	2.59526	0.00945207	0.045075	FDR < 0.10	77.36
ENSG00000066027	PPP2R5A	protein_coding	3156.85	0.414529	4.32569	1.52052e-05	0.000342308	FDR < 0.10	54.8729
ENSG00000096746	HNRNPH3	protein_coding	2476.36	0.414498	5.07338	3.90803e-07	1.80515e-05	FDR < 0.10	109.462
ENSG00000118689	FOXO3	protein_coding	2498.82	0.414291	3.1859	0.00144304	0.0110972	FDR < 0.10	17.9093
ENSG00000172594	SMPDL3A	protein_coding	119.287	0.413552	2.65683	0.00788802	0.0395732	FDR < 0.10	3.71429
ENSG00000086619	ERO1B	protein_coding	168.861	0.413457	2.767	0.00565756	0.0309388	FDR < 0.10	2.525
ENSG00000026508	CD44	protein_coding	10793	0.412985	5.23841	1.61964e-07	8.8912e-06	FDR < 0.10	243.401
ENSG00000163788	SNRK	protein_coding	3972.08	0.412983	3.66643	0.000245963	0.00280178	FDR < 0.10	51.8379
ENSG00000241839	PLEKHO2	protein_coding	9588.51	0.412917	3.29795	0.000973933	0.00816742	FDR < 0.10	138.676
ENSG00000136536	2021-03-07	protein_coding	2403.91	0.412782	4.00651	6.16229e-05	0.00100404	FDR < 0.10	70.6943
ENSG00000171302	CANT1	protein_coding	3545.96	0.412265	3.41269	0.000643253	0.00587405	FDR < 0.10	71.1821
ENSG00000163605	PPP4R2	protein_coding	1128.3	0.412262	4.1259	3.69284e-05	0.000691291	FDR < 0.10	30.2179
ENSG00000156639	ZFAND3	protein_coding	3353.08	0.412114	3.83412	0.000126012	0.00172608	FDR < 0.10	78.2064
ENSG00000110315	RNF141	protein_coding	1795.63	0.411832	3.75691	0.000172025	0.00215757	FDR < 0.10	38.8707
ENSG00000187800	PEAR1	protein_coding	210.753	0.411646	2.4189	0.0155675	0.0645654	FDR < 0.10	2.73714
ENSG00000113140	SPARC	protein_coding	3752.2	0.411642	3.82344	0.000131602	0.00177875	FDR < 0.10	196.195
ENSG00000101109	STK4	protein_coding	7366.2	0.411407	4.65401	3.25542e-06	0.00010212	FDR < 0.10	64.2714
ENSG00000140455	USP3	protein_coding	2152.26	0.411324	3.96268	7.41121e-05	0.0011486	FDR < 0.10	51.1107
ENSG00000119048	UBE2B	protein_coding	2045.45	0.411208	4.02588	5.67622e-05	0.000949785	FDR < 0.10	129.518
ENSG00000133812	SBF2	protein_coding	1009.94	0.411174	3.40231	0.000668183	0.00606677	FDR < 0.10	15.025
ENSG00000182621	PLCB1	protein_coding	118.834	0.41089	2.62634	0.00863087	0.0422892	FDR < 0.10	9.325
ENSG00000162889	MAPKAPK2	protein_coding	4675.43	0.410069	3.87146	0.000108184	0.00152579	FDR < 0.10	92.2957
ENSG00000173614	NMNAT1	protein_coding	252.707	0.409892	3.27361	0.00106182	0.00874013	FDR < 0.10	5.78143
ENSG00000273136	NBPF26	protein_coding	552.798	0.409867	3.96267	7.4116e-05	0.0011486	FDR < 0.10	9.215
ENSG00000132334	PTPRE	protein_coding	4202.72	0.40972	2.91334	0.0035758	0.0219421	FDR < 0.10	52.7093
ENSG00000275993	CH507-42P11.8	protein_coding	279.239	0.408945	2.50121	0.012377	0.054591	FDR < 0.10	3.22857
ENSG00000126822	PLEKHG3	protein_coding	6489.99	0.408874	2.55659	0.0105704	0.0488892	FDR < 0.10	107.649
ENSG00000102531	FNDC3A	protein_coding	829.064	0.40874	3.99194	6.55358e-05	0.00104865	FDR < 0.10	7.33071
ENSG00000111897	SERINC1	protein_coding	5405.96	0.40826	4.3739	1.22044e-05	0.000285095	FDR < 0.10	93.6286
ENSG00000130830	MPP1	protein_coding	4254.93	0.407982	2.73304	0.0062753	0.0333212	FDR < 0.10	126.474
ENSG00000072518	MARK2	protein_coding	4160.88	0.407865	2.97046	0.00297354	0.0190333	FDR < 0.10	60.9543
ENSG00000153207	AHCTF1	protein_coding	2484.91	0.407486	2.80272	0.00506739	0.0283857	FDR < 0.10	30.27
ENSG00000160991	ORAI2	protein_coding	4680.84	0.406994	3.02131	0.00251686	0.0167396	FDR < 0.10	82.2779
ENSG00000184481	FOXO4	protein_coding	2103.57	0.406831	2.76294	0.00572832	0.031209	FDR < 0.10	37.845
ENSG00000141506	PIK3R5	protein_coding	7449.15	0.406725	3.12957	0.00175063	0.0128599	FDR < 0.10	100.454
ENSG00000166888	STAT6	protein_coding	15298.7	0.406132	2.83534	0.00457773	0.0262813	FDR < 0.10	263.999
ENSG00000146278	PNRC1	protein_coding	7332.32	0.406103	3.86587	0.000110693	0.00155657	FDR < 0.10	247.699
ENSG00000100106	TRIOBP	protein_coding	2406.64	0.405884	3.00024	0.00269771	0.0176302	FDR < 0.10	47.0671
ENSG00000172007	RAB33B	protein_coding	437.182	0.405664	3.16174	0.00156828	0.0118497	FDR < 0.10	5.11357
ENSG00000040633	PHF23	protein_coding	1595.42	0.404874	4.50165	6.74277e-06	0.000180273	FDR < 0.10	50.2271
ENSG00000108846	ABCC3	protein_coding	539.969	0.404859	3.57734	0.000347113	0.00364156	FDR < 0.10	7.985
ENSG00000181381	DDX60L	protein_coding	1809.88	0.404829	2.57223	0.0101045	0.0472857	FDR < 0.10	23.3607
ENSG00000120889	TNFRSF10B	protein_coding	1774.18	0.40475	3.23173	0.00123042	0.00976742	FDR < 0.10	31.5307
ENSG00000101457	DNTTIP1	protein_coding	1437.95	0.404274	3.54511	0.000392453	0.00401253	FDR < 0.10	70.8286
ENSG00000086065	CHMP5	protein_coding	1218.12	0.403857	4.47922	7.49154e-06	0.000194059	FDR < 0.10	48.1386
ENSG00000183283	DAZAP2	protein_coding	21926.5	0.403691	3.81269	0.000137461	0.00183362	FDR < 0.10	1031.92
ENSG00000171608	PIK3CD	protein_coding	15425.1	0.403607	2.94447	0.00323513	0.0202629	FDR < 0.10	169.859
ENSG00000106348	IMPDH1	protein_coding	8302.04	0.403588	2.66517	0.00769502	0.038837	FDR < 0.10	211.194
ENSG00000114573	ATP6V1A	protein_coding	3008.88	0.403265	2.80102	0.00509421	0.0284913	FDR < 0.10	38.9907
ENSG00000140564	FURIN	protein_coding	6880.07	0.40317	3.09141	0.00199211	0.0141742	FDR < 0.10	90.3086
ENSG00000118503	TNFAIP3	protein_coding	1894.67	0.40302	2.74335	0.00608157	0.0325763	FDR < 0.10	26.9121
ENSG00000204427	ABHD16A	protein_coding	1623.59	0.402677	3.91866	8.90421e-05	0.00131973	FDR < 0.10	58.5336
ENSG00000141968	VAV1	protein_coding	4912.44	0.402531	3.43629	0.000589746	0.00547298	FDR < 0.10	104.693
ENSG00000107738	VSIR	protein_coding	34855.4	0.402191	2.81921	0.00481427	0.0272675	FDR < 0.10	831.051
ENSG00000100226	GTPBP1	protein_coding	2203.17	0.401742	3.53334	0.000410349	0.00415384	FDR < 0.10	31.6107
ENSG00000100605	ITPK1	protein_coding	7725.75	0.401581	3.16093	0.00157264	0.0118763	FDR < 0.10	157.08
ENSG00000101849	TBL1X	protein_coding	3774.78	0.401536	3.10772	0.00188539	0.0136254	FDR < 0.10	36.3564
ENSG00000139278	GLIPR1	protein_coding	4000.35	0.401424	4.06881	4.72542e-05	0.000826543	FDR < 0.10	152.645
ENSG00000099308	MAST3	protein_coding	5462.02	0.401355	2.46975	0.0135209	0.0582328	FDR < 0.10	52.3214
ENSG00000187037	GPR141	protein_coding	204.114	0.401073	2.27369	0.0229846	0.0859018	FDR < 0.10	14.2171
ENSG00000173638	SLC19A1	protein_coding	3312.56	0.401055	2.32328	0.0201639	0.0780789	FDR < 0.10	69.315
ENSG00000143862	ARL8A	protein_coding	1559.59	0.400903	3.48348	0.000494934	0.00479308	FDR < 0.10	56.2836
ENSG00000110931	CAMKK2	protein_coding	3405.85	0.400486	3.18082	0.00146858	0.0112391	FDR < 0.10	46.5729
ENSG00000164548	TRA2A	protein_coding	1023.67	0.400435	4.71749	2.3877e-06	7.95871e-05	FDR < 0.10	43.9764
ENSG00000163660	CCNL1	protein_coding	1641.45	0.399338	2.55349	0.0106649	0.0491984	FDR < 0.10	53.385
ENSG00000124126	PREX1	protein_coding	24718.4	0.399306	2.85719	0.00427412	0.0250326	FDR < 0.10	224.71
ENSG00000132002	DNAJB1	protein_coding	2943.66	0.399271	4.87683	1.07804e-06	4.12515e-05	FDR < 0.10	73.2114
ENSG00000174574	AKIRIN1	protein_coding	2236.87	0.399254	5.42969	5.64509e-08	3.6791e-06	FDR < 0.10	45.1786
ENSG00000198478	SH3BGRL2	protein_coding	469.743	0.398883	3.08908	0.00200777	0.0142359	FDR < 0.10	5.36571
ENSG00000186635	ARAP1	protein_coding	17941.8	0.398862	2.63576	0.00839479	0.0413739	FDR < 0.10	328.861
ENSG00000166091	CMTM5	protein_coding	279.957	0.398499	2.62778	0.00859438	0.0421717	FDR < 0.10	17.41
ENSG00000105851	PIK3CG	protein_coding	1592.87	0.398299	3.24319	0.001182	0.00945838	FDR < 0.10	18.3514
ENSG00000076356	PLXNA2	protein_coding	221.64	0.398239	2.21056	0.0270663	0.0965339	FDR < 0.10	1.63786
ENSG00000092841	MYL6	protein_coding	20484.9	0.39724	5.56897	2.56247e-08	1.98773e-06	FDR < 0.10	2123.97
ENSG00000157557	ETS2	protein_coding	2295.26	0.39723	3.22525	0.00125862	0.00993918	FDR < 0.10	35.8486
ENSG00000002933	TMEM176A	protein_coding	416.484	0.397213	3.07978	0.00207151	0.014555	FDR < 0.10	20.4429
ENSG00000114268	PFKFB4	protein_coding	2670.04	0.397156	2.37698	0.0174551	0.0701398	FDR < 0.10	43.0193
ENSG00000141298	SSH2	protein_coding	9659.18	0.397123	2.81976	0.00480595	0.0272477	FDR < 0.10	68.0243
ENSG00000158828	PINK1	protein_coding	4043.64	0.396716	2.82471	0.00473228	0.0269463	FDR < 0.10	85.9457
ENSG00000078747	ITCH	protein_coding	1923.78	0.396493	4.6403	3.47897e-06	0.000106556	FDR < 0.10	22.5764
ENSG00000069943	PIGB	protein_coding	368.744	0.396188	3.12297	0.00179035	0.0130857	FDR < 0.10	15.3586
ENSG00000112245	PTP4A1	protein_coding	1221	0.395982	3.7232	0.000196715	0.00237388	FDR < 0.10	60.4229
ENSG00000133048	CHI3L1	protein_coding	7290.81	0.395575	2.28473	0.0223286	0.0843181	FDR < 0.10	269.381
ENSG00000162711	NLRP3	protein_coding	853.086	0.395442	3.94981	7.82126e-05	0.00119393	FDR < 0.10	12.9786
ENSG00000115756	HPCAL1	protein_coding	2461.05	0.395356	3.701	0.000214753	0.00253529	FDR < 0.10	83.0743
ENSG00000214413	BBIP1	protein_coding	319.989	0.395122	3.84206	0.000122005	0.00168738	FDR < 0.10	21.6679
ENSG00000180667	YOD1	protein_coding	343.902	0.394874	2.7732	0.00555086	0.0304604	FDR < 0.10	2.89286
ENSG00000139436	GIT2	protein_coding	3469.17	0.394578	3.50422	0.000457939	0.0045077	FDR < 0.10	56.8421
ENSG00000076108	BAZ2A	protein_coding	5891.82	0.39457	3.4203	0.000625517	0.00574658	FDR < 0.10	51.5586
ENSG00000163599	CTLA4	protein_coding	93.8186	0.394527	2.36931	0.0178213	0.0712503	FDR < 0.10	2.75929
ENSG00000105722	ERF	protein_coding	1974.12	0.39444	2.88784	0.00387894	0.0233702	FDR < 0.10	50.0893
ENSG00000012660	ELOVL5	protein_coding	5078.54	0.394438	3.67271	0.00023999	0.0027491	FDR < 0.10	103.894
ENSG00000011600	TYROBP	protein_coding	18933.8	0.394286	3.57017	0.000356747	0.00372345	FDR < 0.10	2467.8
ENSG00000184922	FMNL1	protein_coding	23534.1	0.393893	2.49444	0.0126158	0.0553194	FDR < 0.10	500.221
ENSG00000090674	MCOLN1	protein_coding	817.464	0.393857	2.81227	0.00491937	0.0277307	FDR < 0.10	25.1021
ENSG00000130703	OSBPL2	protein_coding	2641.32	0.39381	2.66992	0.00758684	0.0385226	FDR < 0.10	44.1764
ENSG00000145012	LPP	protein_coding	689.508	0.393643	3.82967	0.000128314	0.00174681	FDR < 0.10	3.75357
ENSG00000120899	PTK2B	protein_coding	7977.98	0.393051	3.533	0.000410871	0.00415401	FDR < 0.10	128.955
ENSG00000100284	TOM1	protein_coding	2438.4	0.392521	2.95567	0.0031199	0.0197386	FDR < 0.10	58.7986
ENSG00000103226	NOMO3	protein_coding	897.731	0.392267	2.73948	0.00615373	0.032859	FDR < 0.10	15.3171
ENSG00000164754	RAD21	protein_coding	4468.82	0.392128	4.20747	2.5825e-05	0.000522836	FDR < 0.10	72.0836
ENSG00000110934	BIN2	protein_coding	12449.7	0.392102	3.17245	0.00151161	0.0115068	FDR < 0.10	308.915
ENSG00000092531	SNAP23	protein_coding	3784.46	0.392045	3.35599	0.000790809	0.00692892	FDR < 0.10	161.334
ENSG00000160785	SLC25A44	protein_coding	2471.04	0.391893	3.13618	0.00171165	0.0126582	FDR < 0.10	39.6264
ENSG00000067208	EVI5	protein_coding	243.037	0.39181	3.39063	0.000697328	0.00628741	FDR < 0.10	3.78643
ENSG00000127663	KDM4B	protein_coding	4520.29	0.391779	2.65894	0.00783879	0.0393816	FDR < 0.10	43.7264
ENSG00000100221	JOSD1	protein_coding	1235.84	0.391714	4.50081	6.7696e-06	0.000180603	FDR < 0.10	20.8014
ENSG00000055208	TAB2	protein_coding	3085.12	0.391113	3.46462	0.00053098	0.00505865	FDR < 0.10	41.1036
ENSG00000198933	TBKBP1	protein_coding	997.865	0.391103	2.32587	0.0200253	0.077732	FDR < 0.10	17.675
ENSG00000101335	MYL9	protein_coding	813.085	0.391051	3.2934	0.000989844	0.00828624	FDR < 0.10	35.2007
ENSG00000110172	CHORDC1	protein_coding	358.767	0.390926	3.6566	0.000255583	0.00288603	FDR < 0.10	13.9486
ENSG00000106991	ENG	protein_coding	613.638	0.390841	3.33508	0.000852753	0.00734984	FDR < 0.10	11.1186
ENSG00000101336	HCK	protein_coding	15750.9	0.390799	3.03487	0.00240643	0.0161861	FDR < 0.10	424.867
ENSG00000065882	TBC1D1	protein_coding	3652.84	0.390718	3.15573	0.00160095	0.0120519	FDR < 0.10	88.6929
ENSG00000155849	ELMO1	protein_coding	2391.46	0.390567	3.75031	0.000176615	0.00218632	FDR < 0.10	52.3379
ENSG00000132825	PPP1R3D	protein_coding	669.511	0.390504	2.73631	0.00621316	0.0330281	FDR < 0.10	9.91429
ENSG00000169564	PCBP1	protein_coding	16694.9	0.390431	4.36686	1.26044e-05	0.000291576	FDR < 0.10	541.315
ENSG00000133794	ARNTL	protein_coding	1046.62	0.3904	3.32058	0.000898301	0.00766375	FDR < 0.10	25.4614
ENSG00000197747	S100A10	protein_coding	3705.49	0.390276	3.76974	0.00016342	0.00208258	FDR < 0.10	365.294
ENSG00000040341	STAU2	protein_coding	400.915	0.38978	4.14477	3.40161e-05	0.000653449	FDR < 0.10	14.7536
ENSG00000175806	MSRA	protein_coding	421.179	0.389295	2.87798	0.00400226	0.0239014	FDR < 0.10	17.655
ENSG00000000938	FGR	protein_coding	18255.6	0.389118	4.02742	5.63922e-05	0.000946601	FDR < 0.10	424.047
ENSG00000204420	MPIG6B	protein_coding	925.173	0.38908	3.22011	0.00128143	0.0100826	FDR < 0.10	23.9507
ENSG00000198160	MIER1	protein_coding	1231.25	0.388843	3.98668	6.70053e-05	0.00106263	FDR < 0.10	20.4129
ENSG00000144848	ATG3	protein_coding	2655.4	0.388564	5.32072	1.0336e-07	6.02144e-06	FDR < 0.10	105.502
ENSG00000180354	MTURN	protein_coding	1608.67	0.388383	3.60193	0.000315866	0.0034051	FDR < 0.10	28.5579
ENSG00000196787	HIST1H2AG	protein_coding	118.9	0.388284	2.60373	0.00922167	0.0442572	FDR < 0.10	2.93214
ENSG00000108861	DUSP3	protein_coding	776.723	0.387769	3.72048	0.000198847	0.002387	FDR < 0.10	11.5821
ENSG00000106052	TAX1BP1	protein_coding	2871.17	0.387597	4.95193	7.34798e-07	3.01373e-05	FDR < 0.10	62.2429
ENSG00000111266	DUSP16	protein_coding	903.107	0.387337	4.46803	7.89447e-06	0.000201785	FDR < 0.10	9.92357
ENSG00000140941	MAP1LC3B	protein_coding	3830.55	0.387304	4.31012	1.63164e-05	0.000360501	FDR < 0.10	84.7221
ENSG00000119844	AFTPH	protein_coding	1621.22	0.387081	4.22004	2.44261e-05	0.000502354	FDR < 0.10	27.905
ENSG00000109458	GAB1	protein_coding	429.401	0.387022	2.70914	0.00674573	0.035281	FDR < 0.10	6.14429
ENSG00000087589	CASS4	protein_coding	2300.02	0.386507	2.35178	0.0186837	0.0735134	FDR < 0.10	45.4779
ENSG00000134250	NOTCH2	protein_coding	7234.5	0.385859	4.1308	3.61498e-05	0.000684192	FDR < 0.10	35.1671
ENSG00000114541	FRMD4B	protein_coding	309.158	0.385806	2.8133	0.00490354	0.0276524	FDR < 0.10	5.63786
ENSG00000164144	ARFIP1	protein_coding	866.286	0.385707	3.91781	8.93583e-05	0.00132299	FDR < 0.10	20.51
ENSG00000102007	PLP2	protein_coding	3610.43	0.385633	4.56062	5.10032e-06	0.000146473	FDR < 0.10	206.324
ENSG00000126883	NUP214	protein_coding	3362	0.385391	3.8925	9.92146e-05	0.00143062	FDR < 0.10	217.551
ENSG00000100393	EP300	protein_coding	3876.67	0.38524	3.12294	0.00179054	0.0130857	FDR < 0.10	24.1643
ENSG00000120885	CLU	protein_coding	2794.57	0.385002	3.2081	0.00133613	0.0104118	FDR < 0.10	141.883
ENSG00000117410	ATP6V0B	protein_coding	6372.92	0.384852	3.2054	0.00134873	0.0104901	FDR < 0.10	368.217
ENSG00000138814	PPP3CA	protein_coding	1393.92	0.384461	3.67809	0.000234988	0.00271019	FDR < 0.10	21.0714
ENSG00000187446	CHP1	protein_coding	2069.71	0.384152	4.14645	3.37665e-05	0.000650403	FDR < 0.10	39.3779
ENSG00000147010	SH3KBP1	protein_coding	5476.4	0.383956	4.13013	3.62555e-05	0.000684192	FDR < 0.10	93.7493
ENSG00000197746	PSAP	protein_coding	76844.4	0.383852	4.30753	1.65087e-05	0.000364186	FDR < 0.10	1566.41
ENSG00000130150	MOSPD2	protein_coding	1261.22	0.383754	2.48202	0.0130639	0.0566751	FDR < 0.10	23.3943
ENSG00000164808	SPIDR	protein_coding	541.024	0.383433	3.69419	0.000220587	0.00258817	FDR < 0.10	19.3343
ENSG00000166946	CCNDBP1	protein_coding	3739.61	0.383424	3.6815	0.000231865	0.00268186	FDR < 0.10	146.92
ENSG00000099246	RAB18	protein_coding	1387.12	0.383417	3.51541	0.00043908	0.00437577	FDR < 0.10	72.0679
ENSG00000123810	B9D2	protein_coding	385.351	0.383339	2.64595	0.00814614	0.0405829	FDR < 0.10	23.6779
ENSG00000153317	ASAP1	protein_coding	2414.92	0.38308	2.72762	0.0063793	0.0337104	FDR < 0.10	31.5943
ENSG00000095787	WAC	protein_coding	4526.76	0.38268	4.48974	7.13098e-06	0.000187096	FDR < 0.10	92.7214
ENSG00000173198	CYSLTR1	protein_coding	555.52	0.382635	3.17743	0.00148586	0.011341	FDR < 0.10	11.6543
ENSG00000165406	2021-03-08	protein_coding	4309.27	0.382413	2.85028	0.00436812	0.0254266	FDR < 0.10	58.0714
ENSG00000108424	KPNB1	protein_coding	7284.39	0.381751	3.36899	0.000754447	0.00667176	FDR < 0.10	189.331
ENSG00000136048	DRAM1	protein_coding	498.13	0.381701	3.55681	0.000375388	0.00387736	FDR < 0.10	9.09857
ENSG00000127328	RAB3IP	protein_coding	188.359	0.381555	3.33466	0.000854051	0.00735215	FDR < 0.10	7.075
ENSG00000117984	CTSD	protein_coding	18473.5	0.381349	2.95379	0.00313894	0.0198239	FDR < 0.10	581.217
ENSG00000166716	ZNF592	protein_coding	3558.35	0.381336	3.12494	0.0017784	0.0130237	FDR < 0.10	26.9729
ENSG00000082781	ITGB5	protein_coding	425.463	0.381317	3.27027	0.00107444	0.00880334	FDR < 0.10	11.9779
ENSG00000156052	GNAQ	protein_coding	1594.46	0.381312	3.23896	0.00119966	0.00958717	FDR < 0.10	17.7521
ENSG00000005961	ITGA2B	protein_coding	1754.26	0.380976	3.24762	0.00116375	0.00934207	FDR < 0.10	51.5386
ENSG00000253276	CCDC71L	protein_coding	597.469	0.380614	3.57699	0.000347575	0.0036424	FDR < 0.10	16.5657
ENSG00000159720	ATP6V0D1	protein_coding	6870.22	0.380471	2.88905	0.00386402	0.0233035	FDR < 0.10	231.499
ENSG00000163960	UBXN7	protein_coding	1031.12	0.380354	3.76377	0.00016737	0.00211699	FDR < 0.10	5.94786
ENSG00000183255	PTTG1IP	protein_coding	4470.71	0.380188	3.86021	0.000113289	0.00158682	FDR < 0.10	90.3414
ENSG00000145703	IQGAP2	protein_coding	2836.54	0.379573	4.11607	3.85382e-05	0.000711586	FDR < 0.10	50.3236
ENSG00000107554	DNMBP	protein_coding	314.524	0.379558	3.58167	0.000341408	0.00360422	FDR < 0.10	3.05786
ENSG00000149131	SERPING1	protein_coding	471.156	0.379278	2.19818	0.0279363	0.0986968	FDR < 0.10	19.1171
ENSG00000169220	RGS14	protein_coding	6222.5	0.379254	2.60561	0.00917118	0.0441187	FDR < 0.10	188.696
ENSG00000166501	PRKCB	protein_coding	9292.35	0.379152	4.46052	8.17608e-06	0.000206544	FDR < 0.10	99.4307
ENSG00000184634	MED12	protein_coding	1469.43	0.379006	3.30362	0.000954466	0.008061	FDR < 0.10	17.1829
ENSG00000121807	CCR2	protein_coding	2206.32	0.37895	3.13475	0.00172003	0.012707	FDR < 0.10	53.8271
ENSG00000134107	BHLHE40	protein_coding	2103.12	0.378859	3.88952	0.000100444	0.00144374	FDR < 0.10	34.3493
ENSG00000100207	TCF20	protein_coding	1942.46	0.378823	3.64182	0.000270713	0.00301867	FDR < 0.10	18.6836
ENSG00000197622	CDC42SE1	protein_coding	19965.3	0.378661	3.02039	0.00252446	0.0167745	FDR < 0.10	417.906
ENSG00000082014	SMARCD3	protein_coding	615.74	0.378501	4.5117	6.43096e-06	0.000175505	FDR < 0.10	21.1036
ENSG00000068971	PPP2R5B	protein_coding	545.124	0.378467	2.9107	0.00360621	0.0220631	FDR < 0.10	12.1693
ENSG00000151883	PARP8	protein_coding	3715.95	0.378054	3.2104	0.00132549	0.0103551	FDR < 0.10	73.7479
ENSG00000163754	GYG1	protein_coding	942.114	0.377921	4.07865	4.52979e-05	0.000799181	FDR < 0.10	29.8371
ENSG00000111348	ARHGDIB	protein_coding	45473.1	0.377829	4.96694	6.8019e-07	2.82853e-05	FDR < 0.10	2170.93
ENSG00000169905	TOR1AIP2	protein_coding	688.261	0.377271	3.70753	0.000209294	0.00248111	FDR < 0.10	8.15857
ENSG00000055609	KMT2C	protein_coding	2470.05	0.377035	3.12374	0.00178566	0.0130634	FDR < 0.10	16.01
ENSG00000109787	KLF3	protein_coding	4052.8	0.376944	3.74931	0.00017732	0.00219125	FDR < 0.10	43.4414
ENSG00000143753	DEGS1	protein_coding	1351.06	0.376942	3.73693	0.00018628	0.00227245	FDR < 0.10	37.9214
ENSG00000167703	SLC43A2	protein_coding	8544.52	0.376741	2.55607	0.0105863	0.0489307	FDR < 0.10	150.519
ENSG00000054967	RELT	protein_coding	2329.09	0.376709	2.80957	0.00496073	0.0278758	FDR < 0.10	40.4436
ENSG00000130592	LSP1	protein_coding	41658.3	0.376495	2.77785	0.00547191	0.0301844	FDR < 0.10	1484.23
ENSG00000170776	AKAP13	protein_coding	8105.93	0.376146	3.69408	0.000220683	0.00258817	FDR < 0.10	94.9993
ENSG00000091436	MAP3K20	protein_coding	226.963	0.376069	2.28543	0.0222875	0.0842452	FDR < 0.10	2.91286
ENSG00000159082	SYNJ1	protein_coding	609.508	0.375983	2.89914	0.00374186	0.0227363	FDR < 0.10	8.01286
ENSG00000158615	PPP1R15B	protein_coding	1908.42	0.375655	3.92366	8.72156e-05	0.00130212	FDR < 0.10	19.3729
ENSG00000143622	RIT1	protein_coding	1484.58	0.375619	3.29709	0.000976914	0.00818439	FDR < 0.10	44.0214
ENSG00000140350	ANP32A	protein_coding	5711.76	0.375579	3.41432	0.000639407	0.00584267	FDR < 0.10	243.075
ENSG00000136436	CALCOCO2	protein_coding	2893.01	0.375436	4.14023	3.46958e-05	0.000661286	FDR < 0.10	94.3464
ENSG00000136816	TOR1B	protein_coding	801.979	0.375386	3.87714	0.00010569	0.00150439	FDR < 0.10	17.7207
ENSG00000065135	GNAI3	protein_coding	2485.08	0.375027	4.83988	1.29917e-06	4.85421e-05	FDR < 0.10	4.74071
ENSG00000127920	GNG11	protein_coding	775.819	0.374672	2.91104	0.00360231	0.0220574	FDR < 0.10	13.7164
ENSG00000196663	TECPR2	protein_coding	3115.58	0.374583	2.65357	0.00796452	0.0398589	FDR < 0.10	26.6264
ENSG00000185630	PBX1	protein_coding	175.358	0.374577	2.68979	0.00714972	0.0368537	FDR < 0.10	5.90786
ENSG00000111802	TDP2	protein_coding	2043.59	0.374456	4.22368	2.40348e-05	0.000496452	FDR < 0.10	56.8807
ENSG00000114450	GNB4	protein_coding	893.391	0.374325	3.4671	0.000526103	0.00503895	FDR < 0.10	10.4693
ENSG00000169826	CSGALNACT2	protein_coding	1488.38	0.374318	3.8067	0.000140835	0.00186469	FDR < 0.10	21.5021
ENSG00000186834	HEXIM1	protein_coding	1092.54	0.3743	4.20084	2.65923e-05	0.00053609	FDR < 0.10	16.335
ENSG00000100614	PPM1A	protein_coding	2440.66	0.374146	3.24332	0.00118147	0.00945838	FDR < 0.10	63.4514
ENSG00000183508	FAM46C	protein_coding	1496.41	0.37377	3.01902	0.00253592	0.0168263	FDR < 0.10	13.5729
ENSG00000250021	C15orf38-AP3S2	protein_coding	272.948	0.373616	2.55136	0.0107304	0.0494054	FDR < 0.10	6.16214
ENSG00000213246	SUPT4H1	protein_coding	3039.91	0.373237	4.3288	1.49927e-05	0.00033913	FDR < 0.10	169.309
ENSG00000277443	MARCKS	protein_coding	2435.17	0.372882	2.65569	0.00791465	0.0396789	FDR < 0.10	30.4036
ENSG00000136560	TANK	protein_coding	1701.09	0.372807	3.85899	0.000113858	0.00159138	FDR < 0.10	54.8757
ENSG00000145780	FEM1C	protein_coding	416.675	0.372763	3.37613	0.000735125	0.00653734	FDR < 0.10	3.81214
ENSG00000204525	HLA-C	protein_coding	83461.1	0.372716	2.94658	0.00321314	0.0201676	FDR < 0.10	3375.31
ENSG00000164190	NIPBL	protein_coding	2214.12	0.372713	3.69023	0.000224056	0.0026127	FDR < 0.10	21.6164
ENSG00000102882	MAPK3	protein_coding	3296.8	0.372645	2.69569	0.00702432	0.0363549	FDR < 0.10	133.785
ENSG00000197535	MYO5A	protein_coding	1449.75	0.372403	3.31487	0.000916868	0.00780349	FDR < 0.10	12.7814
ENSG00000182923	CEP63	protein_coding	1432.99	0.372268	3.05701	0.00223556	0.0153774	FDR < 0.10	43.3743
ENSG00000198176	TFDP1	protein_coding	1299.46	0.371728	4.39509	1.10727e-05	0.000263841	FDR < 0.10	35.7964
ENSG00000111229	ARPC3	protein_coding	12566.8	0.37151	4.28777	1.80477e-05	0.000391481	FDR < 0.10	796.789
ENSG00000162341	TPCN2	protein_coding	836.401	0.371471	2.50595	0.0122122	0.054048	FDR < 0.10	13.5221
ENSG00000043462	LCP2	protein_coding	7428.76	0.371424	3.51887	0.000433389	0.00433589	FDR < 0.10	219.959
ENSG00000153395	LPCAT1	protein_coding	5134.28	0.371385	5.10549	3.29942e-07	1.55936e-05	FDR < 0.10	85.3779
ENSG00000153310	FAM49B	protein_coding	5659.43	0.371254	3.75913	0.000170503	0.00214626	FDR < 0.10	210.171
ENSG00000171310	CHST11	protein_coding	4526.06	0.371126	2.93398	0.00334641	0.0207938	FDR < 0.10	53.6193
ENSG00000137414	FAM8A1	protein_coding	1841.1	0.371107	3.13925	0.00169381	0.0125719	FDR < 0.10	20.9071
ENSG00000127507	ADGRE2	protein_coding	4321.88	0.37095	3.43744	0.000587239	0.00545681	FDR < 0.10	53.4929
ENSG00000243646	IL10RB	protein_coding	3001.79	0.370912	3.40097	0.000671478	0.00608122	FDR < 0.10	86.7736
ENSG00000170759	KIF5B	protein_coding	1671.83	0.370542	4.02174	5.77692e-05	0.000960512	FDR < 0.10	15.185
ENSG00000083223	ZCCHC6	protein_coding	3048.44	0.370461	2.72069	0.0065146	0.0342984	FDR < 0.10	44.9779
ENSG00000144747	TMF1	protein_coding	1104.66	0.36984	4.2408	2.22724e-05	0.000466805	FDR < 0.10	12.3979
ENSG00000184113	CLDN5	protein_coding	127.222	0.36969	2.28312	0.0224233	0.0845569	FDR < 0.10	5.28071
ENSG00000135506	OS9	protein_coding	8237.67	0.369337	3.3459	0.000820145	0.00713777	FDR < 0.10	210.361
ENSG00000100030	MAPK1	protein_coding	6563.98	0.369233	3.92579	8.64456e-05	0.00129333	FDR < 0.10	107.392
ENSG00000011638	TMEM159	protein_coding	199.853	0.369194	2.78336	0.00537997	0.0297664	FDR < 0.10	9.88286
ENSG00000135677	GNS	protein_coding	5322.31	0.369192	3.64688	0.000265442	0.0029715	FDR < 0.10	57.14
ENSG00000163840	DTX3L	protein_coding	2786.88	0.369144	3.97666	6.98889e-05	0.00109981	FDR < 0.10	25.1521
ENSG00000166925	TSC22D4	protein_coding	7738.32	0.369113	2.87726	0.00401147	0.0239463	FDR < 0.10	215.931
ENSG00000170296	GABARAP	protein_coding	15438.3	0.368908	3.87412	0.000107012	0.00151676	FDR < 0.10	1567.33
ENSG00000177606	JUN	protein_coding	540.775	0.368863	3.22051	0.00127963	0.0100795	FDR < 0.10	8.18929
ENSG00000113273	ARSB	protein_coding	500.57	0.36877	3.21104	0.00132254	0.0103434	FDR < 0.10	5.50357
ENSG00000034713	GABARAPL2	protein_coding	2586.25	0.368629	3.69411	0.000220655	0.00258817	FDR < 0.10	163.662
ENSG00000112763	BTN2A1	protein_coding	2427.96	0.36855	2.89918	0.00374134	0.0227363	FDR < 0.10	46.56
ENSG00000085265	FCN1	protein_coding	31005.3	0.368385	3.38301	0.000716973	0.00640786	FDR < 0.10	1230.28
ENSG00000169180	XPO6	protein_coding	21457.9	0.367993	2.42539	0.0152921	0.0636983	FDR < 0.10	483.457
ENSG00000198925	ATG9A	protein_coding	1637.49	0.367931	2.86129	0.00421922	0.0247813	FDR < 0.10	29.1021
ENSG00000185262	UBALD2	protein_coding	4146.15	0.367811	3.07787	0.00208485	0.0146155	FDR < 0.10	264.862
ENSG00000095303	PTGS1	protein_coding	2273.8	0.367798	3.51491	0.000439897	0.00437763	FDR < 0.10	23.9493
ENSG00000128815	WDFY4	protein_coding	2879.19	0.367695	2.75823	0.00581151	0.0315151	FDR < 0.10	39.0857
ENSG00000211455	STK38L	protein_coding	1088.49	0.367379	3.43138	0.000600525	0.00556577	FDR < 0.10	26.8
ENSG00000130939	UBE4B	protein_coding	1532.44	0.367308	3.38067	0.000723103	0.00645456	FDR < 0.10	21.9264
ENSG00000121064	SCPEP1	protein_coding	2480.18	0.367021	4.01266	6.00378e-05	0.000986102	FDR < 0.10	80.905
ENSG00000179335	CLK3	protein_coding	2273.82	0.366905	2.92839	0.00340722	0.0211257	FDR < 0.10	95.3057
ENSG00000123983	ACSL3	protein_coding	557.617	0.36688	4.21163	2.53534e-05	0.000516957	FDR < 0.10	12.9071
ENSG00000100296	THOC5	protein_coding	1295.22	0.366457	3.31305	0.000922844	0.00784032	FDR < 0.10	36.5229
ENSG00000178974	FBXO34	protein_coding	698.338	0.366227	4.37221	1.22996e-05	0.000286382	FDR < 0.10	11.3886
ENSG00000205352	PRR13	protein_coding	8180.97	0.366214	3.50307	0.000459929	0.00452417	FDR < 0.10	479.581
ENSG00000117475	BLZF1	protein_coding	310.762	0.366092	3.22286	0.00126918	0.0100138	FDR < 0.10	7.86
ENSG00000107863	ARHGAP21	protein_coding	475.356	0.366089	3.9591	7.52337e-05	0.00115837	FDR < 0.10	6.52929
ENSG00000110876	SELPLG	protein_coding	24275	0.365938	3.01283	0.00258823	0.0170869	FDR < 0.10	630.159
ENSG00000116668	SWT1	protein_coding	120.829	0.36529	2.51571	0.0118792	0.052985	FDR < 0.10	1.82571
ENSG00000060237	WNK1	protein_coding	6248.68	0.365252	3.73442	0.000188151	0.00229137	FDR < 0.10	58.7693
ENSG00000140368	PSTPIP1	protein_coding	2921.24	0.365202	2.66332	0.00773741	0.0389958	FDR < 0.10	134.981
ENSG00000184702	SEPT5	protein_coding	962.715	0.365201	2.33853	0.0193595	0.0756623	FDR < 0.10	27.4821
ENSG00000076067	RBMS2	protein_coding	243.347	0.365078	2.66622	0.00767092	0.0387521	FDR < 0.10	3.22143
ENSG00000166912	MTMR10	protein_coding	1950.06	0.36505	2.88388	0.00392813	0.023587	FDR < 0.10	23.465
ENSG00000058272	PPP1R12A	protein_coding	1859.11	0.364733	3.4572	0.000545815	0.00517568	FDR < 0.10	36.8943
ENSG00000141447	OSBPL1A	protein_coding	181.796	0.364632	2.43554	0.0148695	0.0625683	FDR < 0.10	4.06357
ENSG00000006007	GDE1	protein_coding	2138.29	0.364581	3.51232	0.000444217	0.00440299	FDR < 0.10	45.6114
ENSG00000144040	SFXN5	protein_coding	536.453	0.364328	2.46163	0.0138309	0.0591791	FDR < 0.10	8.77071
ENSG00000104870	FCGRT	protein_coding	11140.4	0.364325	2.88607	0.00390085	0.0234528	FDR < 0.10	477.158
ENSG00000111540	RAB5B	protein_coding	5102.9	0.364254	3.65595	0.000256228	0.00289102	FDR < 0.10	86.38
ENSG00000151532	VTI1A	protein_coding	570.959	0.364197	3.37088	0.000749292	0.00663851	FDR < 0.10	11.9593
ENSG00000135052	GOLM1	protein_coding	254.868	0.363793	2.26345	0.0236082	0.0876404	FDR < 0.10	4.99857
ENSG00000005483	KMT2E	protein_coding	3248.4	0.363192	4.0124	6.01038e-05	0.000986102	FDR < 0.10	32.69
ENSG00000145730	PAM	protein_coding	803.701	0.363006	3.00792	0.0026304	0.0172933	FDR < 0.10	21.235
ENSG00000101082	SLA2	protein_coding	1292.13	0.362829	3.86171	0.000112595	0.00158065	FDR < 0.10	26.6664
ENSG00000150961	SEC24D	protein_coding	895.545	0.362637	3.72441	0.000195776	0.00236605	FDR < 0.10	14.0579
ENSG00000182220	ATP6AP2	protein_coding	2932.01	0.362456	4.70802	2.50141e-06	8.2264e-05	FDR < 0.10	148.559
ENSG00000104447	TRPS1	protein_coding	234.056	0.362426	2.89331	0.003812	0.0230781	FDR < 0.10	2.37786
ENSG00000144635	DYNC1LI1	protein_coding	1394.02	0.362088	3.36293	0.000771206	0.0067989	FDR < 0.10	32.3386
ENSG00000179361	ARID3B	protein_coding	1797.35	0.362027	2.46482	0.0137082	0.0588782	FDR < 0.10	23.4293
ENSG00000125834	STK35	protein_coding	1103.56	0.361581	2.63175	0.00849452	0.0417789	FDR < 0.10	8.715
ENSG00000144909	OSBPL11	protein_coding	1427.88	0.361133	2.9741	0.0029385	0.0188585	FDR < 0.10	18.2221
ENSG00000121964	GTDC1	protein_coding	402.471	0.361022	2.90027	0.00372837	0.0226833	FDR < 0.10	10.6436
ENSG00000134287	ARF3	protein_coding	5791.04	0.360792	4.04399	5.25501e-05	0.000904762	FDR < 0.10	100.803
ENSG00000173085	COQ2	protein_coding	167.702	0.360619	2.41796	0.0156079	0.0646653	FDR < 0.10	6.04643
ENSG00000166145	SPINT1	protein_coding	904.92	0.360561	2.41929	0.0155509	0.0645414	FDR < 0.10	21.1921
ENSG00000105639	JAK3	protein_coding	4613.2	0.360355	2.66637	0.00766755	0.0387521	FDR < 0.10	52.4864
ENSG00000100079	LGALS2	protein_coding	456.985	0.360295	2.24515	0.0247585	0.090726	FDR < 0.10	56.2014
ENSG00000198771	RCSD1	protein_coding	6578.87	0.359683	4.01098	6.04667e-05	0.000989726	FDR < 0.10	116.359
ENSG00000116514	RNF19B	protein_coding	4166.21	0.359614	2.77012	0.00560349	0.0306952	FDR < 0.10	92.68
ENSG00000141012	GALNS	protein_coding	794.73	0.359399	2.42958	0.0151161	0.0632892	FDR < 0.10	20.4286
ENSG00000081913	PHLPP1	protein_coding	440.491	0.359318	2.35729	0.018409	0.0727846	FDR < 0.10	3.75071
ENSG00000092871	RFFL	protein_coding	2743.53	0.359292	2.947	0.00320871	0.0201486	FDR < 0.10	45.3507
ENSG00000164111	ANXA5	protein_coding	3216.71	0.359074	4.2175	2.47023e-05	0.000507304	FDR < 0.10	107.971
ENSG00000138434	SSFA2	protein_coding	1838.68	0.359033	3.40616	0.000658834	0.00599715	FDR < 0.10	30.9743
ENSG00000168556	ING2	protein_coding	158.71	0.35896	2.754	0.0058871	0.0317627	FDR < 0.10	8.65
ENSG00000216490	IFI30	protein_coding	14531.6	0.35844	4.48203	7.39378e-06	0.000192928	FDR < 0.10	775.716
ENSG00000162511	LAPTM5	protein_coding	52268.5	0.35843	3.5803	0.000343201	0.00361755	FDR < 0.10	1308.16
ENSG00000167987	VPS37C	protein_coding	1035.08	0.358406	2.52841	0.0114581	0.0517374	FDR < 0.10	21.525
ENSG00000175489	LRRC25	protein_coding	9122.8	0.35793	2.87307	0.00406498	0.024205	FDR < 0.10	228.619
ENSG00000112406	HECA	protein_coding	2825.36	0.357924	3.69283	0.000221777	0.00259673	FDR < 0.10	26.7221
ENSG00000149532	CPSF7	protein_coding	2979.51	0.357912	3.34076	0.000835482	0.00724474	FDR < 0.10	51.0536
ENSG00000126860	EVI2A	protein_coding	3391.32	0.357743	3.15467	0.00160679	0.0120704	FDR < 0.10	106.757
ENSG00000168615	ADAM9	protein_coding	322.664	0.357563	2.87916	0.00398736	0.0238323	FDR < 0.10	5.22786
ENSG00000213516	RBMXL1	protein_coding	448.186	0.357429	3.65675	0.00025543	0.00288603	FDR < 0.10	5.90857
ENSG00000125735	TNFSF14	protein_coding	2088.24	0.357394	2.70766	0.00677596	0.0354002	FDR < 0.10	36.2307
ENSG00000168216	LMBRD1	protein_coding	1352.76	0.357181	3.0573	0.00223342	0.0153774	FDR < 0.10	34.6764
ENSG00000196189	SEMA4A	protein_coding	4645.34	0.357093	2.19806	0.0279447	0.0987019	FDR < 0.10	85.4286
ENSG00000085063	CD59	protein_coding	1011.85	0.356812	3.58209	0.000340861	0.00360112	FDR < 0.10	39.0493
ENSG00000054793	ATP9A	protein_coding	170.835	0.35678	2.63023	0.00853261	0.0419373	FDR < 0.10	1.18643
ENSG00000124226	RNF114	protein_coding	1965.04	0.356679	4.21374	2.51172e-05	0.000513608	FDR < 0.10	60.3657
ENSG00000139644	TMBIM6	protein_coding	20492.9	0.356467	4.44507	8.78613e-06	0.000219238	FDR < 0.10	458.486
ENSG00000185963	BICD2	protein_coding	2661.13	0.356366	3.12746	0.00176323	0.0129324	FDR < 0.10	28.5764
ENSG00000174238	PITPNA	protein_coding	3188.06	0.355614	3.54156	0.000397761	0.00405228	FDR < 0.10	93.2829
ENSG00000135956	TMEM127	protein_coding	6693.93	0.354913	3.00539	0.00265244	0.0174141	FDR < 0.10	87.6193
ENSG00000185947	ZNF267	protein_coding	1087.35	0.354837	3.44052	0.000580597	0.00541625	FDR < 0.10	19.3314
ENSG00000109971	HSPA8	protein_coding	21780.6	0.354726	4.5873	4.49019e-06	0.000132964	FDR < 0.10	634.893
ENSG00000124222	STX16	protein_coding	2376.7	0.354248	2.1944	0.0282068	0.0993572	FDR < 0.10	33.9986
ENSG00000142409	ZNF787	protein_coding	941.446	0.354177	3.45123	0.000558037	0.00526081	FDR < 0.10	27.7307
ENSG00000131051	RBM39	protein_coding	3907.65	0.354031	3.29849	0.000972064	0.00816134	FDR < 0.10	128.789
ENSG00000196743	GM2A	protein_coding	1433.8	0.353994	3.80592	0.000141281	0.0018659	FDR < 0.10	20.7779
ENSG00000110713	NUP98	protein_coding	3629.3	0.353688	3.17449	0.00150101	0.0114322	FDR < 0.10	48.0236
ENSG00000092199	HNRNPC	protein_coding	12663.8	0.353198	5.31399	1.07249e-07	6.19743e-06	FDR < 0.10	527.271
ENSG00000225190	PLEKHM1	protein_coding	2640.96	0.353083	2.66524	0.00769334	0.038837	FDR < 0.10	36.0471
ENSG00000124942	AHNAK	protein_coding	20162	0.353074	3.59841	0.000320166	0.00343331	FDR < 0.10	82.9257
ENSG00000133606	MKRN1	protein_coding	7119.94	0.353064	2.91899	0.00351169	0.0216231	FDR < 0.10	154.542
ENSG00000048828	FAM120A	protein_coding	4035.61	0.352867	3.60122	0.000316724	0.0034092	FDR < 0.10	52.9293
ENSG00000171298	GAA	protein_coding	3974.7	0.352863	2.7007	0.00691938	0.0360017	FDR < 0.10	78.4579
ENSG00000115091	ACTR3	protein_coding	9737.44	0.35279	4.27031	1.95199e-05	0.000417702	FDR < 0.10	312.839
ENSG00000142784	WDTC1	protein_coding	4831.23	0.352393	2.78255	0.00539341	0.0298257	FDR < 0.10	58.6607
ENSG00000185339	TCN2	protein_coding	180.995	0.35224	2.68524	0.00724773	0.0372245	FDR < 0.10	4.95929
ENSG00000134698	AGO4	protein_coding	3834.03	0.35208	2.504	0.0122799	0.0542803	FDR < 0.10	41.5229
ENSG00000143819	EPHX1	protein_coding	134.404	0.352033	2.28179	0.0225016	0.0847624	FDR < 0.10	4.94714
ENSG00000189068	VSTM1	protein_coding	368.938	0.351372	3.42417	0.000616686	0.00568042	FDR < 0.10	22.8771
ENSG00000145687	SSBP2	protein_coding	488.589	0.351163	3.29808	0.000973479	0.00816742	FDR < 0.10	22.7371
ENSG00000196730	DAPK1	protein_coding	1121.57	0.351039	2.95152	0.00316218	0.0199266	FDR < 0.10	11.1979
ENSG00000170271	FAXDC2	protein_coding	871.603	0.350802	2.27759	0.0227512	0.085368	FDR < 0.10	21.2257
ENSG00000124762	CDKN1A	protein_coding	823.874	0.350759	3.81012	0.000138899	0.00184705	FDR < 0.10	22.325
ENSG00000136238	RAC1	protein_coding	5462.01	0.35056	4.63948	3.49281e-06	0.000106751	FDR < 0.10	289.701
ENSG00000064666	CNN2	protein_coding	21529.6	0.350452	2.67008	0.00758342	0.0385189	FDR < 0.10	581.944
ENSG00000138964	PARVG	protein_coding	5501.22	0.350424	2.34857	0.0188459	0.0739788	FDR < 0.10	167.709
ENSG00000112343	TRIM38	protein_coding	1987.1	0.350415	3.55213	0.000382125	0.00392662	FDR < 0.10	11.0543
ENSG00000129353	SLC44A2	protein_coding	14914.9	0.350029	2.5906	0.00958075	0.0455651	FDR < 0.10	299.022
ENSG00000184730	APOBR	protein_coding	7382.89	0.350023	2.58625	0.00970271	0.0460089	FDR < 0.10	104.881
ENSG00000023318	ERP44	protein_coding	1553.43	0.349975	4.08792	4.35258e-05	0.000774643	FDR < 0.10	17.0321
ENSG00000141551	CSNK1D	protein_coding	6202.89	0.349876	3.06957	0.00214369	0.0149399	FDR < 0.10	125.13
ENSG00000141429	GALNT1	protein_coding	1051.12	0.349786	4.14119	3.45511e-05	0.000660171	FDR < 0.10	24.2529
ENSG00000103187	COTL1	protein_coding	32546.4	0.349643	3.95427	7.67692e-05	0.00117693	FDR < 0.10	1037.29
ENSG00000119922	IFIT2	protein_coding	6871.23	0.349584	2.52501	0.0115696	0.0519778	FDR < 0.10	106.689
ENSG00000125810	CD93	protein_coding	7716.91	0.349505	2.3957	0.0165886	0.0675519	FDR < 0.10	60.3914
ENSG00000187699	C2orf88	protein_coding	660.847	0.349438	2.67072	0.00756899	0.038473	FDR < 0.10	19.7443
ENSG00000162704	ARPC5	protein_coding	8480.85	0.349415	3.75558	0.000172938	0.00215953	FDR < 0.10	394.251
ENSG00000145685	LHFPL2	protein_coding	324.826	0.34907	3.38271	0.00071775	0.00641079	FDR < 0.10	4.08286
ENSG00000134313	KIDINS220	protein_coding	2162.64	0.348959	3.61808	0.000296797	0.0032536	FDR < 0.10	16.2
ENSG00000005249	PRKAR2B	protein_coding	853.36	0.34867	2.91411	0.00356701	0.0218976	FDR < 0.10	12.2
ENSG00000013364	MVP	protein_coding	7999.95	0.348616	2.987	0.00281726	0.0182361	FDR < 0.10	187.859
ENSG00000093167	LRRFIP2	protein_coding	756.363	0.348487	3.22516	0.00125902	0.00993918	FDR < 0.10	19.9871
ENSG00000213066	FGFR1OP	protein_coding	245.138	0.348464	2.20547	0.0274209	0.0973335	FDR < 0.10	6.20429
ENSG00000176095	IP6K1	protein_coding	3151.73	0.348404	3.0556	0.00224607	0.0154348	FDR < 0.10	46.75
ENSG00000196154	S100A4	protein_coding	15456.7	0.348402	3.77757	0.000158364	0.00204001	FDR < 0.10	1825.5
ENSG00000198223	CSF2RA	protein_coding	2144.59	0.348135	2.47561	0.0133009	0.0573894	FDR < 0.10	71.3429
ENSG00000156273	BACH1	protein_coding	3935.57	0.348069	3.01417	0.00257681	0.0170194	FDR < 0.10	39.6343
ENSG00000082074	FYB	protein_coding	9729.45	0.347921	3.01815	0.00254324	0.01686	FDR < 0.10	149.766
ENSG00000136156	ITM2B	protein_coding	37106.4	0.34791	3.08423	0.0020408	0.0144057	FDR < 0.10	2482.07
ENSG00000164054	SHISA5	protein_coding	11471.7	0.347776	3.49223	0.000479009	0.00467001	FDR < 0.10	359.209
ENSG00000105355	PLIN3	protein_coding	2641.37	0.347677	2.86131	0.00421892	0.0247813	FDR < 0.10	67.2793
ENSG00000154589	LY96	protein_coding	318.054	0.347669	2.27139	0.0231235	0.0863305	FDR < 0.10	39.365
ENSG00000172493	AFF1	protein_coding	1567.79	0.347595	3.1848	0.00144853	0.0111215	FDR < 0.10	9.57857
ENSG00000204713	TRIM27	protein_coding	2740.1	0.347577	4.35057	1.35787e-05	0.000312594	FDR < 0.10	52.3921
ENSG00000130779	CLIP1	protein_coding	1624.06	0.347473	3.72293	0.000196923	0.00237388	FDR < 0.10	22.1079
ENSG00000088726	TMEM40	protein_coding	275.937	0.347239	2.62834	0.00858015	0.0421274	FDR < 0.10	18.1064
ENSG00000271425	NBPF10	protein_coding	299.019	0.347219	2.80594	0.00501705	0.0281369	FDR < 0.10	1.20071
ENSG00000132824	SERINC3	protein_coding	3975.86	0.347034	3.42024	0.00062567	0.00574658	FDR < 0.10	59.5629
ENSG00000188554	NBR1	protein_coding	4521.48	0.347034	4.43656	9.14071e-06	0.00022611	FDR < 0.10	57.9593
ENSG00000049245	VAMP3	protein_coding	1683.7	0.346989	3.63237	0.000280833	0.00311448	FDR < 0.10	46.9371
ENSG00000101752	MIB1	protein_coding	434.225	0.346914	2.84044	0.00450507	0.0260117	FDR < 0.10	3.17429
ENSG00000112079	STK38	protein_coding	5304.32	0.346683	4.08684	4.37293e-05	0.000776675	FDR < 0.10	80.0829
ENSG00000120708	TGFBI	protein_coding	4091.1	0.346643	2.8166	0.00485351	0.0274571	FDR < 0.10	106.48
ENSG00000172845	SP3	protein_coding	2966.14	0.346329	3.40197	0.000669012	0.00606938	FDR < 0.10	61.3793
ENSG00000131236	CAP1	protein_coding	26446	0.346186	3.07601	0.00209789	0.014678	FDR < 0.10	734.999
ENSG00000110047	EHD1	protein_coding	9575.15	0.345885	2.81491	0.00487915	0.0275661	FDR < 0.10	154.308
ENSG00000156642	NPTN	protein_coding	2185.9	0.345625	3.80585	0.000141318	0.0018659	FDR < 0.10	116.205
ENSG00000095383	TBC1D2	protein_coding	788.144	0.345349	2.5663	0.0102788	0.0478506	FDR < 0.10	14.1979
ENSG00000131238	PPT1	protein_coding	8036.76	0.344928	3.13253	0.00173307	0.0127622	FDR < 0.10	242.529
ENSG00000155465	SLC7A7	protein_coding	3103.23	0.344836	3.95991	7.49789e-05	0.00115694	FDR < 0.10	85.2771
ENSG00000116604	MEF2D	protein_coding	3138.44	0.344778	2.99346	0.00275836	0.0179281	FDR < 0.10	37.8607
ENSG00000105887	MTPN	protein_coding	6018.51	0.344667	3.89891	9.66268e-05	0.00140301	FDR < 0.10	112.944
ENSG00000178385	PLEKHM3	protein_coding	457.448	0.344586	2.94921	0.00318585	0.0200581	FDR < 0.10	3.38786
ENSG00000158195	WASF2	protein_coding	7866.78	0.344521	3.79279	0.000148963	0.00194881	FDR < 0.10	73.5486
ENSG00000169398	PTK2	protein_coding	223.534	0.344341	2.63889	0.00831771	0.0410649	FDR < 0.10	4.83571
ENSG00000143418	CERS2	protein_coding	4148.63	0.343665	3.82234	0.000132191	0.00178175	FDR < 0.10	132.711
ENSG00000151948	GLT1D1	protein_coding	4048.61	0.343487	2.53085	0.0113787	0.0515029	FDR < 0.10	76.6007
ENSG00000101596	SMCHD1	protein_coding	10312	0.343343	2.36253	0.0181505	0.0720818	FDR < 0.10	82.6321
ENSG00000109270	LAMTOR3	protein_coding	933.962	0.343185	3.59498	0.000324421	0.00346611	FDR < 0.10	41.54
ENSG00000137845	ADAM10	protein_coding	3229.41	0.34306	4.06988	4.70366e-05	0.000824758	FDR < 0.10	81.58
ENSG00000157933	SKI	protein_coding	2967.21	0.342991	2.53956	0.0110993	0.0506134	FDR < 0.10	31.4821
ENSG00000162923	WDR26	protein_coding	3280.15	0.342644	3.10251	0.00191885	0.0137835	FDR < 0.10	50.5664
ENSG00000116489	CAPZA1	protein_coding	6702.53	0.34248	4.09726	4.18061e-05	0.000757232	FDR < 0.10	193.198
ENSG00000117228	GBP1	protein_coding	2204.62	0.342468	3.67434	0.000238464	0.00273601	FDR < 0.10	47.3457
ENSG00000072062	PRKACA	protein_coding	4756.32	0.342403	2.69147	0.00711377	0.0367215	FDR < 0.10	120.036
ENSG00000187764	SEMA4D	protein_coding	11313.2	0.34228	2.37686	0.0174608	0.0701428	FDR < 0.10	164.082
ENSG00000161217	PCYT1A	protein_coding	2185.68	0.342107	2.64264	0.00822625	0.0407948	FDR < 0.10	33.9821
ENSG00000067560	RHOA	protein_coding	19803	0.341919	4.26239	2.02248e-05	0.000431493	FDR < 0.10	563.606
ENSG00000205726	ITSN1	protein_coding	133.507	0.341851	2.3201	0.0203355	0.0785729	FDR < 0.10	2.95
ENSG00000140479	PCSK6	protein_coding	188.422	0.341689	2.25492	0.0241381	0.0890931	FDR < 0.10	3.63643
ENSG00000100591	AHSA1	protein_coding	1566.21	0.341602	4.74062	2.13065e-06	7.29274e-05	FDR < 0.10	88.7357
ENSG00000109323	MANBA	protein_coding	1542.41	0.341559	3.13315	0.00172938	0.0127563	FDR < 0.10	31.2614
ENSG00000090316	MAEA	protein_coding	2668.02	0.34145	2.41939	0.0155466	0.0645414	FDR < 0.10	70.5621
ENSG00000007237	GAS7	protein_coding	2869.68	0.341417	4.64545	3.39339e-06	0.000104915	FDR < 0.10	25.4943
ENSG00000123384	LRP1	protein_coding	3345.26	0.341371	2.6834	0.0072877	0.0374028	FDR < 0.10	26.7679
ENSG00000116350	SRSF4	protein_coding	2347.96	0.341341	3.85834	0.000114158	0.00159138	FDR < 0.10	57.2821
ENSG00000157350	ST3GAL2	protein_coding	3344.18	0.341166	2.91213	0.00358969	0.021999	FDR < 0.10	44.7614
ENSG00000119917	IFIT3	protein_coding	3675.35	0.341136	2.59231	0.00953349	0.0453874	FDR < 0.10	81.2307
ENSG00000117151	CTBS	protein_coding	1293.21	0.34113	2.75589	0.00585334	0.0316725	FDR < 0.10	31.0457
ENSG00000162129	CLPB	protein_coding	202.139	0.341036	2.39732	0.0165154	0.0673673	FDR < 0.10	4.56
ENSG00000138069	RAB1A	protein_coding	1647.28	0.340966	3.99266	6.53357e-05	0.00104779	FDR < 0.10	52.0593
ENSG00000183726	TMEM50A	protein_coding	3710.07	0.340256	4.15647	3.23209e-05	0.000626789	FDR < 0.10	105.135
ENSG00000117862	TXNDC12	protein_coding	1924.49	0.34001	4.76595	1.87965e-06	6.53644e-05	FDR < 0.10	55.3407
ENSG00000143119	CD53	protein_coding	18893.6	0.339988	3.67856	0.00023455	0.00270853	FDR < 0.10	753.272
ENSG00000067066	SP100	protein_coding	2970.73	0.339458	3.90955	9.2469e-05	0.00135923	FDR < 0.10	87.0843
ENSG00000180353	HCLS1	protein_coding	23315	0.339207	2.9579	0.00309745	0.0196591	FDR < 0.10	663.811
ENSG00000108510	MED13	protein_coding	1287.52	0.338761	3.81937	0.000133791	0.00179812	FDR < 0.10	7.03929
ENSG00000102172	SMS	protein_coding	1138.85	0.338736	3.31554	0.000914663	0.00778937	FDR < 0.10	38.5779
ENSG00000013016	EHD3	protein_coding	518.374	0.338719	3.5751	0.00035009	0.00366606	FDR < 0.10	5.94643
ENSG00000143624	INTS3	protein_coding	1670.73	0.338556	2.57751	0.00995154	0.0468289	FDR < 0.10	19.7714
ENSG00000166783	KIAA0430	protein_coding	5007.95	0.338506	2.77717	0.00548337	0.0301945	FDR < 0.10	45.9429
ENSG00000172795	DCP2	protein_coding	2003.24	0.338417	2.86978	0.00410752	0.0243585	FDR < 0.10	31.5736
ENSG00000138071	ACTR2	protein_coding	11410	0.338376	4.28311	1.84298e-05	0.000397956	FDR < 0.10	194.076
ENSG00000162378	ZYG11B	protein_coding	547.431	0.338114	3.13226	0.00173465	0.0127622	FDR < 0.10	3.82286
ENSG00000136144	RCBTB1	protein_coding	398.362	0.337937	2.90621	0.00365836	0.0223144	FDR < 0.10	5.61929
ENSG00000070831	CDC42	protein_coding	9609.84	0.337626	4.72993	2.24592e-06	7.59622e-05	FDR < 0.10	252.476
ENSG00000143933	CALM2	protein_coding	8046.74	0.337445	4.79847	1.59879e-06	5.77708e-05	FDR < 0.10	408.631
ENSG00000164032	H2AFZ	protein_coding	2998.15	0.336959	4.1985	2.68692e-05	0.000539387	FDR < 0.10	186.482
ENSG00000135926	TMBIM1	protein_coding	5753.17	0.336334	3.76364	0.000167455	0.00211699	FDR < 0.10	141.932
ENSG00000149187	CELF1	protein_coding	2268.24	0.33627	2.80751	0.00499264	0.028022	FDR < 0.10	21.15
ENSG00000198055	GRK6	protein_coding	8052.84	0.336268	3.81894	0.000134025	0.00179855	FDR < 0.10	171.507
ENSG00000133884	DPF2	protein_coding	2206.82	0.336119	3.60025	0.000317917	0.00341689	FDR < 0.10	48.5457
ENSG00000160888	IER2	protein_coding	5439.12	0.335997	2.9432	0.00324839	0.0203263	FDR < 0.10	144.504
ENSG00000132405	TBC1D14	protein_coding	4357.43	0.33551	2.88611	0.00390036	0.0234528	FDR < 0.10	52.0257
ENSG00000149084	HSD17B12	protein_coding	418.861	0.335268	3.35156	0.00080357	0.00701919	FDR < 0.10	13.705
ENSG00000157540	DYRK1A	protein_coding	2171.17	0.335128	4.32353	1.5355e-05	0.000345137	FDR < 0.10	30.7479
ENSG00000186517	ARHGAP30	protein_coding	18094	0.335017	3.42772	0.00060867	0.00563029	FDR < 0.10	232.631
ENSG00000169994	MYO7B	protein_coding	370.59	0.334754	2.48033	0.013126	0.0568237	FDR < 0.10	12.3886
ENSG00000180370	PAK2	protein_coding	6071.82	0.334687	3.11019	0.00186965	0.0135322	FDR < 0.10	69.6379
ENSG00000152242	C18orf25	protein_coding	774.742	0.334366	3.77565	0.000159589	0.00205031	FDR < 0.10	12.2386
ENSG00000119321	FKBP15	protein_coding	2126.49	0.33436	3.63692	0.000275922	0.00306477	FDR < 0.10	26.4807
ENSG00000213445	SIPA1	protein_coding	9716.43	0.334222	2.99967	0.00270271	0.0176468	FDR < 0.10	299.021
ENSG00000097033	SH3GLB1	protein_coding	3133.47	0.334218	3.29918	0.000969661	0.00815145	FDR < 0.10	66.4343
ENSG00000160570	DEDD2	protein_coding	4218.35	0.334018	2.71532	0.00662124	0.0347189	FDR < 0.10	155.709
ENSG00000100345	MYH9	protein_coding	44031.7	0.333784	2.72206	0.00648773	0.0341695	FDR < 0.10	363.359
ENSG00000137752	CASP1	protein_coding	3999.88	0.33377	3.4103	0.000648913	0.00592195	FDR < 0.10	205.174
ENSG00000102804	TSC22D1	protein_coding	994.616	0.333587	3.28365	0.00102471	0.00849839	FDR < 0.10	17.6607
ENSG00000124313	IQSEC2	protein_coding	241.932	0.333576	2.78798	0.00530378	0.0294441	FDR < 0.10	4.66286
ENSG00000156026	MCU	protein_coding	489.413	0.333367	2.73745	0.00619173	0.0329605	FDR < 0.10	11.18
ENSG00000204267	TAP2	protein_coding	3182.21	0.33335	2.77792	0.00547076	0.0301844	FDR < 0.10	51.4307
ENSG00000158793	NIT1	protein_coding	593.748	0.333296	2.59136	0.00955979	0.0454823	FDR < 0.10	27.455
ENSG00000148730	EIF4EBP2	protein_coding	5263.18	0.333264	4.01999	5.82015e-05	0.000963701	FDR < 0.10	38.1929
ENSG00000164327	RICTOR	protein_coding	1470.08	0.33315	2.83761	0.00454528	0.026185	FDR < 0.10	8.66286
ENSG00000118515	SGK1	protein_coding	2811.05	0.332825	3.09463	0.00197061	0.0140703	FDR < 0.10	87.1643
ENSG00000170653	ATF7	protein_coding	779.073	0.332772	4.00142	6.29641e-05	0.00101892	FDR < 0.10	8.57429
ENSG00000158717	RNF166	protein_coding	5863.45	0.332656	2.46799	0.0135875	0.0584491	FDR < 0.10	215.061
ENSG00000131263	RLIM	protein_coding	936.344	0.332648	3.66364	0.000248657	0.0028257	FDR < 0.10	6.785
ENSG00000116584	ARHGEF2	protein_coding	6650.92	0.332238	2.95282	0.00314882	0.0198775	FDR < 0.10	133.246
ENSG00000165813	CCDC186	protein_coding	675.612	0.332233	3.10097	0.00192886	0.0138484	FDR < 0.10	5.58
ENSG00000118985	ELL2	protein_coding	369.871	0.332121	3.04215	0.00234893	0.0159194	FDR < 0.10	5.55643
ENSG00000138688	KIAA1109	protein_coding	1729.95	0.331872	2.83103	0.00463982	0.0265427	FDR < 0.10	17.68
ENSG00000006459	KDM7A	protein_coding	1683.59	0.331818	2.51038	0.0120603	0.0535996	FDR < 0.10	11.9664
ENSG00000131100	ATP6V1E1	protein_coding	3089.8	0.331768	3.96744	7.26499e-05	0.00113326	FDR < 0.10	131.554
ENSG00000118482	PHF3	protein_coding	2102.04	0.331627	4.08867	4.33853e-05	0.000774643	FDR < 0.10	15.6957
ENSG00000100554	ATP6V1D	protein_coding	767.453	0.331539	3.54408	0.00039399	0.00402536	FDR < 0.10	37.4879
ENSG00000070413	DGCR2	protein_coding	4950.08	0.331445	2.57173	0.0101193	0.047324	FDR < 0.10	60.4336
ENSG00000130363	RSPH3	protein_coding	201.636	0.3312	2.70356	0.00686019	0.0357748	FDR < 0.10	2.86143
ENSG00000180573	HIST1H2AC	protein_coding	4314	0.331026	2.53896	0.0111184	0.0506681	FDR < 0.10	151.157
ENSG00000261796	ISY1-RAB43	protein_coding	1590.08	0.331024	2.28329	0.0224133	0.0845428	FDR < 0.10	17.395
ENSG00000139722	VPS37B	protein_coding	2663.5	0.330728	2.87581	0.00402988	0.0240361	FDR < 0.10	48.5171
ENSG00000171940	ZNF217	protein_coding	3798.28	0.330717	2.55028	0.0107636	0.0495098	FDR < 0.10	39.3779
ENSG00000116698	SMG7	protein_coding	2487.3	0.330653	3.49023	0.000482598	0.00469538	FDR < 0.10	26.7164
ENSG00000047644	WWC3	protein_coding	2618.71	0.330588	2.33263	0.0196675	0.0766559	FDR < 0.10	22.1636
ENSG00000123562	MORF4L2	protein_coding	837.77	0.330363	3.85876	0.000113962	0.00159138	FDR < 0.10	50.8186
ENSG00000171475	WIPF2	protein_coding	1963.85	0.330313	3.05363	0.00226088	0.0154845	FDR < 0.10	15.4836
ENSG00000095380	NANS	protein_coding	511.705	0.329945	3.68424	0.000229382	0.0026565	FDR < 0.10	26.425
ENSG00000113732	ATP6V0E1	protein_coding	4756.39	0.329682	4.38111	1.18075e-05	0.000277186	FDR < 0.10	309.866
ENSG00000151743	AMN1	protein_coding	154.106	0.329455	2.39178	0.016767	0.0680841	FDR < 0.10	9.26786
ENSG00000116260	QSOX1	protein_coding	2113.07	0.329408	3.35723	0.000787268	0.00690638	FDR < 0.10	45.1721
ENSG00000115561	CHMP3	protein_coding	3082.65	0.329278	3.75496	0.000173373	0.00216306	FDR < 0.10	110.431
ENSG00000143507	DUSP10	protein_coding	127.707	0.329015	2.25873	0.0238999	0.0884762	FDR < 0.10	2.95714
ENSG00000141232	TOB1	protein_coding	1180.09	0.328998	3.0859	0.00202934	0.0143532	FDR < 0.10	47.28
ENSG00000089351	GRAMD1A	protein_coding	3189.72	0.328446	2.46401	0.0137393	0.0589422	FDR < 0.10	87.9736
ENSG00000114353	GNAI2	protein_coding	31029.5	0.328349	3.19173	0.00141424	0.0108992	FDR < 0.10	760.601
ENSG00000136021	SCYL2	protein_coding	794.692	0.328284	3.01269	0.00258944	0.0170869	FDR < 0.10	10.9436
ENSG00000077721	UBE2A	protein_coding	990.764	0.327402	3.885	0.000102332	0.0014635	FDR < 0.10	38.2207
ENSG00000150337	FCGR1A	protein_coding	616.689	0.32727	2.57936	0.00989831	0.0466993	FDR < 0.10	28.2707
ENSG00000257923	CUX1	protein_coding	2140.17	0.327037	3.61546	0.000299818	0.00328167	FDR < 0.10	33.0543
ENSG00000019995	ZRANB1	protein_coding	1037.14	0.326973	2.8911	0.00383898	0.0231951	FDR < 0.10	9.695
ENSG00000221914	PPP2R2A	protein_coding	959.543	0.326817	3.79502	0.000147634	0.00193319	FDR < 0.10	25.6671
ENSG00000151327	FAM177A1	protein_coding	318.135	0.326796	2.69875	0.00696004	0.0361239	FDR < 0.10	24.5314
ENSG00000109133	TMEM33	protein_coding	995.663	0.326653	3.11035	0.00186865	0.0135318	FDR < 0.10	19.8107
ENSG00000147065	MSN	protein_coding	47449.4	0.326651	3.51477	0.000440137	0.00437763	FDR < 0.10	656.446
ENSG00000142867	BCL10	protein_coding	689.659	0.326517	3.41444	0.000639133	0.00584267	FDR < 0.10	14.3921
ENSG00000143614	GATAD2B	protein_coding	2020.8	0.326456	3.10343	0.00191293	0.0137479	FDR < 0.10	16.19
ENSG00000119457	SLC46A2	protein_coding	198.438	0.32635	2.49878	0.012462	0.0548786	FDR < 0.10	4.73929
ENSG00000134248	LAMTOR5	protein_coding	975.049	0.326304	4.00468	6.21027e-05	0.00100956	FDR < 0.10	106.006
ENSG00000101152	DNAJC5	protein_coding	4585.66	0.326161	3.13359	0.0017268	0.0127504	FDR < 0.10	46.5414
ENSG00000172243	CLEC7A	protein_coding	4375.61	0.326098	2.31265	0.0207417	0.0797109	FDR < 0.10	151.844
ENSG00000135404	CD63	protein_coding	3953.46	0.325932	3.62472	0.000289274	0.0031858	FDR < 0.10	289.44
ENSG00000163737	PF4	protein_coding	3007.54	0.32593	2.78332	0.0053806	0.0297664	FDR < 0.10	349.522
ENSG00000108774	RAB5C	protein_coding	6582.56	0.325798	3.30309	0.000956268	0.00807145	FDR < 0.10	243.301
ENSG00000176393	RNPEP	protein_coding	2299.47	0.325742	3.47719	0.000506697	0.00489316	FDR < 0.10	54.8779
ENSG00000113240	CLK4	protein_coding	566.15	0.325704	2.54917	0.0107979	0.0496356	FDR < 0.10	14.9414
ENSG00000116273	PHF13	protein_coding	387.218	0.325652	2.86119	0.00422059	0.0247813	FDR < 0.10	5.73571
ENSG00000213654	GPSM3	protein_coding	17745.9	0.325409	2.89326	0.00381267	0.0230781	FDR < 0.10	802.129
ENSG00000183785	TUBA8	protein_coding	334.203	0.325279	2.25759	0.0239709	0.0886136	FDR < 0.10	12.2621
ENSG00000121691	CAT	protein_coding	5915.84	0.324931	3.05758	0.00223134	0.0153706	FDR < 0.10	153.516
ENSG00000076513	ANKRD13A	protein_coding	4736.72	0.324867	2.76978	0.00560937	0.0307106	FDR < 0.10	85.4636
ENSG00000198873	GRK5	protein_coding	1210.03	0.324086	3.17706	0.00148775	0.0113494	FDR < 0.10	24.5521
ENSG00000163606	CD200R1	protein_coding	179.867	0.323988	2.20593	0.0273888	0.097268	FDR < 0.10	4.00429
ENSG00000177885	GRB2	protein_coding	12941.2	0.323886	3.09306	0.00198101	0.0141163	FDR < 0.10	256.734
ENSG00000092036	HAUS4	protein_coding	1414.98	0.32384	2.75384	0.00589005	0.0317627	FDR < 0.10	58.9743
ENSG00000064601	CTSA	protein_coding	4981.97	0.323744	3.31309	0.000922713	0.00784032	FDR < 0.10	162.256
ENSG00000185000	DGAT1	protein_coding	1650.12	0.323742	2.37797	0.0174082	0.0699909	FDR < 0.10	54.8464
ENSG00000111684	LPCAT3	protein_coding	882.502	0.322495	3.77021	0.000163108	0.00208047	FDR < 0.10	22.2129
ENSG00000196843	ARID5A	protein_coding	2264.01	0.322314	2.88099	0.00396425	0.0237283	FDR < 0.10	61.1207
ENSG00000137207	YIPF3	protein_coding	3692.8	0.322132	2.73883	0.00616584	0.0328868	FDR < 0.10	145.793
ENSG00000204592	HLA-E	protein_coding	114686	0.321992	3.04892	0.00229667	0.0156715	FDR < 0.10	2508.94
ENSG00000102144	PGK1	protein_coding	10641.7	0.321946	4.54972	5.37173e-06	0.000152427	FDR < 0.10	355.693
ENSG00000198624	CCDC69	protein_coding	5097.02	0.321846	5.15497	2.53676e-07	1.28851e-05	FDR < 0.10	82.2443
ENSG00000054965	FAM168A	protein_coding	1032.9	0.321846	3.58069	0.000342689	0.00361508	FDR < 0.10	8.36929
ENSG00000104312	RIPK2	protein_coding	476.385	0.321595	3.17918	0.0014769	0.0112847	FDR < 0.10	13.3664
ENSG00000149564	ESAM	protein_coding	332.466	0.321593	2.6879	0.00719024	0.0370091	FDR < 0.10	10.2821
ENSG00000255112	CHMP1B	protein_coding	3243.87	0.32157	3.07541	0.00210214	0.0146934	FDR < 0.10	58.8143
ENSG00000164733	CTSB	protein_coding	10124	0.321127	4.36612	1.26471e-05	0.000292091	FDR < 0.10	257.999
ENSG00000132912	DCTN4	protein_coding	762.523	0.321051	3.30384	0.000953689	0.00805921	FDR < 0.10	11.6193
ENSG00000111913	FAM65B	protein_coding	26420.2	0.320949	2.70309	0.00686979	0.0357987	FDR < 0.10	356.684
ENSG00000141562	NARF	protein_coding	2196.28	0.320877	2.6581	0.00785833	0.039452	FDR < 0.10	92.825
ENSG00000163602	RYBP	protein_coding	1730	0.320855	2.98808	0.00280736	0.0182051	FDR < 0.10	12.6364
ENSG00000170581	STAT2	protein_coding	2649.3	0.320801	3.1987	0.00138047	0.0106794	FDR < 0.10	55.9814
ENSG00000160883	HK3	protein_coding	3762.12	0.320343	2.28551	0.0222829	0.0842452	FDR < 0.10	93.1021
ENSG00000068724	TTC7A	protein_coding	2027.89	0.320194	4.24862	2.15094e-05	0.000454148	FDR < 0.10	23.7729
ENSG00000128585	MKLN1	protein_coding	1120.68	0.319927	2.6215	0.00875439	0.0426934	FDR < 0.10	12.0221
ENSG00000114480	GBE1	protein_coding	358.678	0.319764	2.19735	0.0279954	0.0988076	FDR < 0.10	7.21357
ENSG00000214212	C19orf38	protein_coding	2502.09	0.319109	2.66619	0.00767157	0.0387521	FDR < 0.10	122.032
ENSG00000120690	ELF1	protein_coding	4464.47	0.318857	4.42727	9.54349e-06	0.000233244	FDR < 0.10	85.5871
ENSG00000197217	ENTPD4	protein_coding	1504.64	0.318604	2.55867	0.0105072	0.0486756	FDR < 0.10	20.3986
ENSG00000132109	TRIM21	protein_coding	2443.94	0.318535	2.86637	0.00415211	0.0244889	FDR < 0.10	71.8014
ENSG00000065989	PDE4A	protein_coding	374.835	0.317822	2.8943	0.00380008	0.0230215	FDR < 0.10	5.24429
ENSG00000144566	RAB5A	protein_coding	1078.82	0.317741	3.19718	0.00138777	0.010721	FDR < 0.10	28.5136
ENSG00000107745	MICU1	protein_coding	1271.55	0.317737	3.59395	0.0003257	0.00347178	FDR < 0.10	30.3407
ENSG00000116209	TMEM59	protein_coding	3869.55	0.317429	3.57843	0.000345662	0.00363301	FDR < 0.10	255.199
ENSG00000134516	DOCK2	protein_coding	6980.93	0.317317	3.46335	0.000533496	0.00506963	FDR < 0.10	86.3707
ENSG00000171681	ATF7IP	protein_coding	2170.21	0.317234	3.63478	0.00027822	0.00308789	FDR < 0.10	17.5343
ENSG00000108468	CBX1	protein_coding	1357.45	0.317208	3.387	0.000706618	0.00634512	FDR < 0.10	38.3457
ENSG00000150977	RILPL2	protein_coding	2762.74	0.317025	3.44445	0.000572216	0.00536612	FDR < 0.10	23.8436
ENSG00000167461	RAB8A	protein_coding	3579.26	0.316759	3.77993	0.000156873	0.00202263	FDR < 0.10	91.78
ENSG00000160551	TAOK1	protein_coding	1371.11	0.316519	3.20717	0.00134049	0.0104323	FDR < 0.10	6.405
ENSG00000154146	NRGN	protein_coding	7716.65	0.315872	2.98751	0.00281264	0.0182228	FDR < 0.10	388.225
ENSG00000115808	STRN	protein_coding	701.915	0.315806	3.05389	0.00225897	0.0154845	FDR < 0.10	5.57214
ENSG00000163466	ARPC2	protein_coding	17357.1	0.315777	4.04295	5.27832e-05	0.000906589	FDR < 0.10	766.706
ENSG00000205423	CNEP1R1	protein_coding	521.077	0.315656	2.73736	0.00619352	0.0329605	FDR < 0.10	16.9457
ENSG00000127527	EPS15L1	protein_coding	1926.48	0.315644	2.52741	0.0114907	0.0518188	FDR < 0.10	50.4436
ENSG00000259330	INAFM2	protein_coding	931.786	0.315627	3.24866	0.00115949	0.00931837	FDR < 0.10	25.4121
ENSG00000102786	INTS6	protein_coding	854.312	0.315544	3.06474	0.00217858	0.0151093	FDR < 0.10	11.975
ENSG00000100938	GMPR2	protein_coding	2012.73	0.315449	3.2743	0.00105922	0.00872377	FDR < 0.10	78.26
ENSG00000176390	CRLF3	protein_coding	2965.07	0.315447	3.47288	0.000514909	0.00494902	FDR < 0.10	62.1971
ENSG00000124214	STAU1	protein_coding	1816.77	0.315236	3.55161	0.000382887	0.00393162	FDR < 0.10	30.0864
ENSG00000149782	PLCB3	protein_coding	350.898	0.314962	2.43476	0.0149019	0.0626862	FDR < 0.10	4.82071
ENSG00000138413	IDH1	protein_coding	737.434	0.314816	3.3495	0.000809585	0.00706308	FDR < 0.10	17.7821
ENSG00000044574	HSPA5	protein_coding	7372	0.314638	5.14541	2.66938e-07	1.34629e-05	FDR < 0.10	101.223
ENSG00000170340	B3GNT2	protein_coding	621.01	0.31448	3.52879	0.000417466	0.00420832	FDR < 0.10	12.5029
ENSG00000128872	TMOD2	protein_coding	419.993	0.314477	2.34561	0.0189958	0.0744447	FDR < 0.10	3.39214
ENSG00000054267	ARID4B	protein_coding	1866.14	0.314096	3.27091	0.00107203	0.00879305	FDR < 0.10	23.8521
ENSG00000151893	CACUL1	protein_coding	1591.56	0.314024	2.68699	0.00720992	0.0370703	FDR < 0.10	11.4036
ENSG00000140259	MFAP1	protein_coding	797.489	0.313924	3.51656	0.000437181	0.00436356	FDR < 0.10	20.7786
ENSG00000151702	FLI1	protein_coding	5954.11	0.313824	3.53292	0.000410992	0.00415401	FDR < 0.10	133.534
ENSG00000189180	ZNF33A	protein_coding	1550.37	0.313814	2.95656	0.00311096	0.0196995	FDR < 0.10	21.5507
ENSG00000164924	YWHAZ	protein_coding	16287	0.313257	4.15398	3.26737e-05	0.00063277	FDR < 0.10	449.011
ENSG00000230989	HSBP1	protein_coding	1188.65	0.313237	3.52025	0.00043114	0.00432139	FDR < 0.10	48.925
ENSG00000124486	USP9X	protein_coding	2855.66	0.313109	3.07969	0.00207215	0.014555	FDR < 0.10	18.6914
ENSG00000106392	C1GALT1	protein_coding	555.433	0.312914	3.03775	0.00238351	0.0160702	FDR < 0.10	16.065
ENSG00000234745	HLA-B	protein_coding	141065	0.312753	3.16572	0.00154701	0.0117387	FDR < 0.10	8801.67
ENSG00000158201	ABHD3	protein_coding	952.135	0.312456	2.76534	0.00568636	0.0310481	FDR < 0.10	26.8886
ENSG00000166889	PATL1	protein_coding	1499.9	0.312258	2.78917	0.00528434	0.0293476	FDR < 0.10	19.9243
ENSG00000173120	KDM2A	protein_coding	6393.78	0.31217	3.20194	0.00136507	0.0105832	FDR < 0.10	65.0286
ENSG00000153561	RMND5A	protein_coding	2286.95	0.312123	2.86884	0.00411979	0.0243687	FDR < 0.10	27.7721
ENSG00000163902	RPN1	protein_coding	6049.37	0.312059	4.32677	1.51312e-05	0.000341181	FDR < 0.10	146.613
ENSG00000111707	SUDS3	protein_coding	1095.9	0.312027	3.82607	0.000130205	0.00176321	FDR < 0.10	13.84
ENSG00000133872	SARAF	protein_coding	12657.5	0.312	4.54621	5.46213e-06	0.000154073	FDR < 0.10	399.383
ENSG00000015153	YAF2	protein_coding	252.851	0.311761	2.87246	0.00407287	0.024225	FDR < 0.10	14.0286
ENSG00000166333	ILK	protein_coding	3456.3	0.311385	4.27748	1.89022e-05	0.000407538	FDR < 0.10	120.33
ENSG00000162775	RBM15	protein_coding	272.832	0.310848	2.51664	0.0118478	0.0528946	FDR < 0.10	4.45786
ENSG00000100697	DICER1	protein_coding	2134.77	0.31078	2.48924	0.0128017	0.0558944	FDR < 0.10	18.7807
ENSG00000163681	SLMAP	protein_coding	940.072	0.310389	3.78906	0.000151217	0.00197287	FDR < 0.10	17.1543
ENSG00000173575	CHD2	protein_coding	3710.66	0.310299	3.68856	0.000225525	0.00262294	FDR < 0.10	43.8907
ENSG00000213145	CRIP1	protein_coding	3335.37	0.310283	3.26344	0.00110069	0.00895674	FDR < 0.10	487.22
ENSG00000156858	PRR14	protein_coding	1830.42	0.310118	2.27806	0.0227228	0.0853032	FDR < 0.10	82.7836
ENSG00000166710	B2M	protein_coding	210678	0.31004	3.75349	0.000174391	0.00216819	FDR < 0.10	22038.5
ENSG00000107099	DOCK8	protein_coding	10908.5	0.309932	2.60446	0.00920199	0.0442073	FDR < 0.10	89.0493
ENSG00000168961	LGALS9	protein_coding	4345.65	0.309699	3.28901	0.0010054	0.00837716	FDR < 0.10	243.616
ENSG00000214530	STARD10	protein_coding	619.086	0.309594	2.49176	0.0127113	0.0556016	FDR < 0.10	41.9007
ENSG00000010270	STARD3NL	protein_coding	585.254	0.309514	2.78739	0.00531338	0.0294635	FDR < 0.10	21.6243
ENSG00000141664	ZCCHC2	protein_coding	1179.88	0.309055	2.38403	0.017124	0.0690815	FDR < 0.10	16.7864
ENSG00000114166	KAT2B	protein_coding	1555.59	0.308962	3.04332	0.00233987	0.0158882	FDR < 0.10	24.4893
ENSG00000090054	SPTLC1	protein_coding	684.747	0.308844	3.0052	0.00265403	0.0174165	FDR < 0.10	28.3
ENSG00000173757	STAT5B	protein_coding	9901.52	0.308583	2.76312	0.00572515	0.031209	FDR < 0.10	116.981
ENSG00000270629	NBPF14	protein_coding	1642.31	0.308226	3.17942	0.0014757	0.0112842	FDR < 0.10	16.9664
ENSG00000104904	OAZ1	protein_coding	45221.8	0.307985	3.22745	0.00124898	0.00988178	FDR < 0.10	3517.32
ENSG00000086666	ZFAND6	protein_coding	1194.09	0.307787	3.98929	6.62714e-05	0.00105568	FDR < 0.10	71.2164
ENSG00000067369	TP53BP1	protein_coding	568.96	0.307706	2.98479	0.0028377	0.0183435	FDR < 0.10	5.64071
ENSG00000165240	ATP7A	protein_coding	475.116	0.307588	2.3438	0.0190886	0.074726	FDR < 0.10	2.95286
ENSG00000171055	FEZ2	protein_coding	430.105	0.307375	3.03859	0.00237688	0.0160479	FDR < 0.10	19.3886
ENSG00000112983	BRD8	protein_coding	991.15	0.307284	2.70944	0.00673978	0.0352628	FDR < 0.10	22.7986
ENSG00000158773	USF1	protein_coding	2491.38	0.307268	2.69613	0.00701501	0.0363431	FDR < 0.10	99.2843
ENSG00000117676	RPS6KA1	protein_coding	10089.1	0.307229	2.83507	0.00458151	0.0262829	FDR < 0.10	210.293
ENSG00000165119	HNRNPK	protein_coding	16751.7	0.306877	3.71805	0.000200765	0.00240598	FDR < 0.10	495.135
ENSG00000102034	ELF4	protein_coding	3961.29	0.305756	3.03112	0.00243647	0.016342	FDR < 0.10	51.2343
ENSG00000140612	SEC11A	protein_coding	2008.89	0.305717	3.87278	0.000107602	0.00152211	FDR < 0.10	86.9471
ENSG00000154957	ZNF18	protein_coding	421.596	0.305586	2.32964	0.0198254	0.077166	FDR < 0.10	10.3957
ENSG00000105443	CYTH2	protein_coding	1091.67	0.305365	3.07608	0.00209743	0.014678	FDR < 0.10	33.97
ENSG00000058673	ZC3H11A	protein_coding	3871.56	0.305175	3.60758	0.000309071	0.00334956	FDR < 0.10	52.2636
ENSG00000169084	DHRSX	protein_coding	373.081	0.305169	2.69824	0.00697067	0.0361528	FDR < 0.10	16.6643
ENSG00000006712	PAF1	protein_coding	1330.62	0.305063	3.68911	0.000225043	0.00261994	FDR < 0.10	37.5871
ENSG00000162928	PEX13	protein_coding	211.537	0.304806	2.23509	0.0254115	0.09236	FDR < 0.10	3.51643
ENSG00000185973	TMLHE	protein_coding	253.123	0.304183	2.61527	0.00891572	0.0433279	FDR < 0.10	8.40214
ENSG00000115421	PAPOLG	protein_coding	574.725	0.303891	3.06652	0.00216564	0.0150463	FDR < 0.10	8.25857
ENSG00000138496	PARP9	protein_coding	2614.82	0.303677	2.76419	0.00570644	0.0311346	FDR < 0.10	47.4636
ENSG00000205302	SNX2	protein_coding	1871.26	0.30357	4.29556	1.74255e-05	0.000380297	FDR < 0.10	52.7357
ENSG00000149923	PPP4C	protein_coding	3685.53	0.303358	2.97376	0.0029417	0.0188705	FDR < 0.10	169.068
ENSG00000182287	AP1S2	protein_coding	1759.15	0.303124	2.29802	0.0215606	0.0820845	FDR < 0.10	50.8357
ENSG00000101577	LPIN2	protein_coding	5327.15	0.303012	2.49444	0.0126156	0.0553194	FDR < 0.10	53.8343
ENSG00000134046	MBD2	protein_coding	2327.9	0.302884	4.02862	5.61058e-05	0.000943673	FDR < 0.10	125.004
ENSG00000177119	ANO6	protein_coding	1145.58	0.302841	3.6143	0.000301165	0.0032936	FDR < 0.10	10.6193
ENSG00000102710	SUPT20H	protein_coding	1493.05	0.302665	2.92199	0.00347806	0.0214623	FDR < 0.10	35.045
ENSG00000166478	ZNF143	protein_coding	712.872	0.302428	3.8307	0.000127781	0.00174195	FDR < 0.10	25.5879
ENSG00000106565	TMEM176B	protein_coding	976.985	0.302082	2.35588	0.018479	0.0729399	FDR < 0.10	50.0229
ENSG00000108175	ZMIZ1	protein_coding	3387.17	0.301528	2.52504	0.0115686	0.0519778	FDR < 0.10	31.5721
ENSG00000003756	RBM5	protein_coding	3978.94	0.301488	2.39278	0.0167214	0.0679937	FDR < 0.10	94.2521
ENSG00000197063	MAFG	protein_coding	602.36	0.301389	2.5664	0.0102761	0.0478506	FDR < 0.10	7.14429
ENSG00000197771	MCMBP	protein_coding	1862.68	0.301364	3.59662	0.000322375	0.00345181	FDR < 0.10	34.6729
ENSG00000174405	LIG4	protein_coding	215.212	0.301362	2.2676	0.0233538	0.0869403	FDR < 0.10	2.875
ENSG00000023902	PLEKHO1	protein_coding	6161.22	0.301256	3.30674	0.000943892	0.0080001	FDR < 0.10	197.64
ENSG00000204386	NEU1	protein_coding	1151.76	0.301251	2.54264	0.0110019	0.0503138	FDR < 0.10	30.7893
ENSG00000065526	SPEN	protein_coding	3066.57	0.301128	2.4438	0.0145333	0.0615532	FDR < 0.10	27.3621
ENSG00000166233	ARIH1	protein_coding	1276.03	0.300926	4.3698	1.24362e-05	0.000288153	FDR < 0.10	37.1436
ENSG00000198909	MAP3K3	protein_coding	5893.51	0.3009	2.20042	0.0277772	0.0983293	FDR < 0.10	80.94
ENSG00000059377	TBXAS1	protein_coding	4640.1	0.300763	2.46995	0.0135133	0.0582176	FDR < 0.10	151
ENSG00000188186	LAMTOR4	protein_coding	4638.4	0.300717	2.27281	0.0230378	0.0860708	FDR < 0.10	556.105
ENSG00000115145	STAM2	protein_coding	531.729	0.300693	2.88296	0.00393957	0.0236258	FDR < 0.10	6.94429
ENSG00000197548	ATG7	protein_coding	1031.35	0.300431	2.74444	0.00606148	0.032488	FDR < 0.10	27.4971
ENSG00000135899	SP110	protein_coding	3855.8	0.300419	2.7711	0.00558681	0.0306341	FDR < 0.10	123.81
ENSG00000205155	PSENEN	protein_coding	1135.66	0.300349	3.45706	0.000546106	0.00517568	FDR < 0.10	108.934
ENSG00000156587	UBE2L6	protein_coding	3651.86	0.300325	3.58864	0.000332403	0.00351957	FDR < 0.10	167.183
ENSG00000115170	ACVR1	protein_coding	310.996	0.299893	2.77007	0.0056044	0.0306952	FDR < 0.10	6.37214
ENSG00000133943	C14orf159	protein_coding	2132.12	0.299779	2.49454	0.0126122	0.0553194	FDR < 0.10	63.8479
ENSG00000198373	WWP2	protein_coding	4250.75	0.299712	2.20161	0.027693	0.0980798	FDR < 0.10	58.6843
ENSG00000104419	NDRG1	protein_coding	3062.84	0.299649	4.01814	5.86599e-05	0.000969043	FDR < 0.10	68.6814
ENSG00000107290	SETX	protein_coding	4162.25	0.299641	3.27077	0.00107256	0.00879305	FDR < 0.10	33.1621
ENSG00000197006	METTL9	protein_coding	2862.93	0.299612	3.32907	0.000871374	0.00747872	FDR < 0.10	104.091
ENSG00000125637	PSD4	protein_coding	8895.48	0.299601	2.29278	0.0218609	0.0829842	FDR < 0.10	103.889
ENSG00000130985	UBA1	protein_coding	7620.09	0.299525	3.03862	0.00237668	0.0160479	FDR < 0.10	120.539
ENSG00000266094	RASSF5	protein_coding	11930.6	0.299507	2.9169	0.00353534	0.0217499	FDR < 0.10	188.833
ENSG00000168918	INPP5D	protein_coding	8178.09	0.299255	2.6689	0.00761007	0.0385955	FDR < 0.10	113.803
ENSG00000075292	ZNF638	protein_coding	1553.97	0.299137	3.48923	0.000484413	0.00470982	FDR < 0.10	44.5286
ENSG00000137486	ARRB1	protein_coding	2304.27	0.29901	3.25661	0.0011275	0.00912294	FDR < 0.10	51.2386
ENSG00000095015	MAP3K1	protein_coding	2691.47	0.29855	3.95566	7.63229e-05	0.00117135	FDR < 0.10	20.6307
ENSG00000104343	UBE2W	protein_coding	659.169	0.298214	2.72993	0.00633473	0.033537	FDR < 0.10	9.93143
ENSG00000166913	YWHAB	protein_coding	9152.43	0.297807	3.97777	6.95645e-05	0.00109591	FDR < 0.10	166.853
ENSG00000213625	LEPROT	protein_coding	1126.82	0.297572	3.71045	0.000206893	0.00246082	FDR < 0.10	16.1871
ENSG00000065613	SLK	protein_coding	1477.74	0.297517	3.7734	0.000161036	0.00205956	FDR < 0.10	11.8336
ENSG00000166272	WBP1L	protein_coding	2852.22	0.297517	4.40825	1.04207e-05	0.000251242	FDR < 0.10	37.4864
ENSG00000119878	CRIPT	protein_coding	182.228	0.297298	2.26481	0.0235245	0.0873934	FDR < 0.10	5.26357
ENSG00000266028	SRGAP2	protein_coding	1062.98	0.297277	2.33199	0.0197011	0.0767449	FDR < 0.10	20.0914
ENSG00000134982	APC	protein_coding	788.245	0.297133	2.6215	0.00875446	0.0426934	FDR < 0.10	5.40643
ENSG00000178607	ERN1	protein_coding	2870.78	0.297116	3.18236	0.00146081	0.0111857	FDR < 0.10	22.4471
ENSG00000198858	R3HDM4	protein_coding	21882.4	0.296777	2.21576	0.026708	0.0958519	FDR < 0.10	711.184
ENSG00000087086	FTL	protein_coding	176922	0.296662	2.80033	0.00510504	0.0285406	FDR < 0.10	12653.3
ENSG00000080298	RFX3	protein_coding	229.138	0.295747	2.30867	0.020962	0.0804005	FDR < 0.10	3.08643
ENSG00000079805	DNM2	protein_coding	7361.65	0.295711	2.32104	0.0202849	0.0784199	FDR < 0.10	134.153
ENSG00000141367	CLTC	protein_coding	4002.74	0.295699	2.9863	0.00282376	0.0182617	FDR < 0.10	37.7807
ENSG00000089693	MLF2	protein_coding	4188.09	0.295679	2.52633	0.0115263	0.0519164	FDR < 0.10	171.628
ENSG00000102096	PIM2	protein_coding	4446.01	0.295319	3.11672	0.00182873	0.0133035	FDR < 0.10	126.565
ENSG00000213639	PPP1CB	protein_coding	2560.41	0.295156	3.17658	0.00149021	0.0113621	FDR < 0.10	56.0986
ENSG00000101079	NDRG3	protein_coding	1108.86	0.295033	3.77564	0.000159595	0.00205031	FDR < 0.10	20.5521
ENSG00000130402	ACTN4	protein_coding	9577.82	0.294948	2.41888	0.0155685	0.0645654	FDR < 0.10	216.817
ENSG00000147548	NSD3	protein_coding	2524.7	0.294927	3.76452	0.000166871	0.00211335	FDR < 0.10	25.9957
ENSG00000154767	XPC	protein_coding	2019.44	0.294468	3.13227	0.00173462	0.0127622	FDR < 0.10	30.7214
ENSG00000102893	PHKB	protein_coding	942.956	0.29419	3.26327	0.00110133	0.00895684	FDR < 0.10	16.8686
ENSG00000165630	PRPF18	protein_coding	402.144	0.294076	3.09573	0.00196332	0.0140605	FDR < 0.10	14.58
ENSG00000133104	SPG20	protein_coding	728.513	0.294031	3.27715	0.00104862	0.0086514	FDR < 0.10	15.6671
ENSG00000217128	FNIP1	protein_coding	1117.72	0.293966	2.47898	0.0131759	0.0569705	FDR < 0.10	10.3721
ENSG00000124357	NAGK	protein_coding	4881.11	0.293379	2.42332	0.0153792	0.063959	FDR < 0.10	280.042
ENSG00000166128	RAB8B	protein_coding	2004.73	0.293215	2.92036	0.00349632	0.0215563	FDR < 0.10	37.8457
ENSG00000156265	MAP3K7CL	protein_coding	1902.79	0.293002	2.41525	0.0157246	0.0649599	FDR < 0.10	109.296
ENSG00000175857	GAPT	protein_coding	1417.35	0.292978	2.54277	0.0109976	0.0503138	FDR < 0.10	61.0386
ENSG00000143889	HNRNPLL	protein_coding	454.886	0.292846	3.16183	0.0015678	0.0118497	FDR < 0.10	11.56
ENSG00000136754	ABI1	protein_coding	2364.31	0.29279	4.06265	4.85179e-05	0.000845538	FDR < 0.10	48.555
ENSG00000133639	BTG1	protein_coding	13505.5	0.292657	3.10399	0.00190931	0.0137426	FDR < 0.10	406.099
ENSG00000158636	EMSY	protein_coding	510.437	0.292443	2.93971	0.00328524	0.020494	FDR < 0.10	7.64643
ENSG00000162367	TAL1	protein_coding	569.387	0.29239	2.24227	0.024944	0.0912885	FDR < 0.10	23.8221
ENSG00000100926	TM9SF1	protein_coding	835.32	0.2923	2.87042	0.00409933	0.0243385	FDR < 0.10	21.6293
ENSG00000146007	ZMAT2	protein_coding	2710.28	0.292257	4.08808	4.34949e-05	0.000774643	FDR < 0.10	110.473
ENSG00000090686	USP48	protein_coding	1033.7	0.291831	3.08437	0.00203982	0.0144057	FDR < 0.10	15.0593
ENSG00000134318	ROCK2	protein_coding	444.768	0.291559	2.8594	0.00424446	0.0248936	FDR < 0.10	2.83143
ENSG00000119953	SMNDC1	protein_coding	621.688	0.29148	3.03924	0.00237174	0.0160284	FDR < 0.10	24.1029
ENSG00000172661	WASHC2C	protein_coding	2036.77	0.291371	3.2677	0.00108426	0.00886416	FDR < 0.10	27.3279
ENSG00000165458	INPPL1	protein_coding	2898.8	0.29132	2.43308	0.0149708	0.0628651	FDR < 0.10	58.7521
ENSG00000165025	SYK	protein_coding	7331.56	0.29128	2.42778	0.0151913	0.0634923	FDR < 0.10	80.725
ENSG00000099995	SF3A1	protein_coding	5959.5	0.291083	3.05402	0.00225795	0.0154845	FDR < 0.10	115.153
ENSG00000183475	ASB7	protein_coding	577.591	0.290865	3.26285	0.00110298	0.00896516	FDR < 0.10	6.97571
ENSG00000147394	ZNF185	protein_coding	1821.34	0.290829	2.54422	0.0109523	0.0501677	FDR < 0.10	26.9693
ENSG00000147894	C9orf72	protein_coding	783.21	0.290526	3.09096	0.0019951	0.0141884	FDR < 0.10	14.0036
ENSG00000165861	ZFYVE1	protein_coding	843.67	0.290421	2.73264	0.00628297	0.0333495	FDR < 0.10	12.2107
ENSG00000196712	NF1	protein_coding	642.111	0.290235	3.25025	0.00115305	0.00928225	FDR < 0.10	4.49714
ENSG00000177674	AGTRAP	protein_coding	3508.59	0.2897	2.41706	0.0156465	0.0647873	FDR < 0.10	199.528
ENSG00000130755	GMFG	protein_coding	9407.13	0.289325	3.03774	0.00238357	0.0160702	FDR < 0.10	934.572
ENSG00000111276	CDKN1B	protein_coding	3689.46	0.289234	3.90685	9.3509e-05	0.00136888	FDR < 0.10	76.3171
ENSG00000135363	LMO2	protein_coding	1734.19	0.289183	2.69294	0.00708245	0.0366127	FDR < 0.10	60.7257
ENSG00000123728	RAP2C	protein_coding	1027.69	0.288886	2.98319	0.00285258	0.018423	FDR < 0.10	30.8964
ENSG00000102081	FMR1	protein_coding	700.887	0.288878	2.61243	0.00899008	0.043509	FDR < 0.10	15.3679
ENSG00000119682	AREL1	protein_coding	2589.58	0.288749	2.7777	0.00547447	0.0301844	FDR < 0.10	29.3486
ENSG00000169704	GP9	protein_coding	522.683	0.288498	2.44195	0.014608	0.0617228	FDR < 0.10	36.8507
ENSG00000110321	EIF4G2	protein_coding	14575.1	0.288473	4.64182	3.45348e-06	0.00010618	FDR < 0.10	256.479
ENSG00000068308	OTUD5	protein_coding	2874.43	0.288344	2.65711	0.00788137	0.0395537	FDR < 0.10	67.56
ENSG00000204161	C10orf128	protein_coding	682.499	0.287988	2.2491	0.0245061	0.0900786	FDR < 0.10	31.5764
ENSG00000135503	ACVR1B	protein_coding	677.38	0.287766	2.94781	0.00320029	0.0201191	FDR < 0.10	8.82857
ENSG00000035403	VCL	protein_coding	4579.86	0.287538	3.10577	0.00189783	0.0136787	FDR < 0.10	41.985
ENSG00000163565	IFI16	protein_coding	5323.86	0.287236	3.67065	0.000241937	0.00276696	FDR < 0.10	137.871
ENSG00000071537	SEL1L	protein_coding	2223.16	0.287212	2.88206	0.00395084	0.0236835	FDR < 0.10	20.4886
ENSG00000010818	HIVEP2	protein_coding	1635.77	0.28678	4.19592	2.71768e-05	0.00054327	FDR < 0.10	9.06286
ENSG00000103005	USB1	protein_coding	1856.15	0.28655	2.95037	0.00317389	0.0199916	FDR < 0.10	52.7679
ENSG00000125910	S1PR4	protein_coding	7931.19	0.286365	2.92312	0.00346544	0.0214029	FDR < 0.10	291.174
ENSG00000140153	WDR20	protein_coding	580.963	0.286361	3.6097	0.000306553	0.00333239	FDR < 0.10	14.0843
ENSG00000185880	TRIM69	protein_coding	1268.18	0.286183	3.39395	0.000688914	0.00622333	FDR < 0.10	30.9164
ENSG00000015475	BID	protein_coding	3736.62	0.285964	3.10755	0.00188643	0.013626	FDR < 0.10	180.886
ENSG00000049860	HEXB	protein_coding	1781.76	0.285915	3.47588	0.000509174	0.00490712	FDR < 0.10	81.7464
ENSG00000160877	NACC1	protein_coding	1405.34	0.285802	3.18963	0.00142453	0.0109727	FDR < 0.10	21.3671
ENSG00000120063	GNA13	protein_coding	2940.84	0.285519	2.77367	0.00554274	0.0304275	FDR < 0.10	32.815
ENSG00000204310	AGPAT1	protein_coding	2270.83	0.285479	2.92796	0.00341193	0.0211456	FDR < 0.10	57.9293
ENSG00000128340	RAC2	protein_coding	23464.3	0.285425	3.02096	0.00251978	0.0167512	FDR < 0.10	950.666
ENSG00000118508	RAB32	protein_coding	960.939	0.285414	2.85484	0.00430582	0.0251768	FDR < 0.10	47.0593
ENSG00000022840	RNF10	protein_coding	9721.01	0.285277	2.39712	0.0165244	0.0673673	FDR < 0.10	226.851
ENSG00000157601	MX1	protein_coding	2932.79	0.284884	2.32359	0.0201473	0.0780359	FDR < 0.10	62.8164
ENSG00000080603	SRCAP	protein_coding	1263.57	0.284343	2.34139	0.0192121	0.0751272	FDR < 0.10	9.49286
ENSG00000157764	BRAF	protein_coding	746.09	0.284287	2.49476	0.0126042	0.0553194	FDR < 0.10	7.82214
ENSG00000196505	GDAP2	protein_coding	419.038	0.284266	2.4132	0.0158131	0.0652503	FDR < 0.10	7.24571
ENSG00000036257	CUL3	protein_coding	2011.24	0.284168	3.3469	0.000817195	0.00711643	FDR < 0.10	49.3079
ENSG00000181852	RNF41	protein_coding	1307.76	0.284122	3.88821	0.000100988	0.00145011	FDR < 0.10	32.1364
ENSG00000138640	FAM13A	protein_coding	264.01	0.283925	2.44685	0.0144109	0.0611255	FDR < 0.10	3.845
ENSG00000155827	RNF20	protein_coding	1488.52	0.283896	3.73834	0.00018524	0.00226364	FDR < 0.10	20.96
ENSG00000167460	TPM4	protein_coding	5979.91	0.283422	3.93032	8.48325e-05	0.00127186	FDR < 0.10	128.918
ENSG00000138756	BMP2K	protein_coding	827.282	0.283375	2.36552	0.0180047	0.0717823	FDR < 0.10	11.7379
ENSG00000176783	RUFY1	protein_coding	1977.89	0.283322	3.18354	0.00145486	0.0111557	FDR < 0.10	47.4621
ENSG00000136738	STAM	protein_coding	319.259	0.282701	2.82353	0.00474977	0.0270201	FDR < 0.10	6.42214
ENSG00000242247	ARFGAP3	protein_coding	968.411	0.282672	3.50043	0.000464517	0.00456301	FDR < 0.10	20.515
ENSG00000128245	YWHAH	protein_coding	1761.9	0.282541	3.80997	0.000138985	0.00184705	FDR < 0.10	55.8164
ENSG00000129757	CDKN1C	protein_coding	710.974	0.282329	2.41242	0.0158469	0.0653254	FDR < 0.10	25.4386
ENSG00000148634	HERC4	protein_coding	986.112	0.282204	3.33024	0.00086772	0.00745185	FDR < 0.10	14.38
ENSG00000070495	JMJD6	protein_coding	605.891	0.281986	2.41627	0.0156802	0.0648562	FDR < 0.10	22.3007
ENSG00000131467	PSME3	protein_coding	3148.95	0.281758	3.27135	0.00107036	0.00878508	FDR < 0.10	87.4786
ENSG00000116903	EXOC8	protein_coding	667.721	0.281641	2.59703	0.00940351	0.0448884	FDR < 0.10	6.98071
ENSG00000163219	ARHGAP25	protein_coding	12435.3	0.281503	2.20858	0.0272035	0.0968511	FDR < 0.10	264.906
ENSG00000125779	PANK2	protein_coding	1146.17	0.281484	2.63901	0.00831497	0.0410649	FDR < 0.10	35.7721
ENSG00000173230	GOLGB1	protein_coding	1275.31	0.281438	3.00147	0.00268684	0.0175767	FDR < 0.10	12.2229
ENSG00000029363	BCLAF1	protein_coding	2192.96	0.28131	3.82954	0.000128382	0.00174681	FDR < 0.10	53.8971
ENSG00000107201	DDX58	protein_coding	1458.4	0.281028	2.88356	0.00393204	0.0236005	FDR < 0.10	17.9879
ENSG00000130303	BST2	protein_coding	1897.5	0.280997	3.74941	0.000177248	0.00219125	FDR < 0.10	115.444
ENSG00000237765	FAM200B	protein_coding	453.497	0.280683	2.24195	0.0249647	0.0913409	FDR < 0.10	39.7486
ENSG00000185896	LAMP1	protein_coding	4994.48	0.280663	3.21174	0.00131936	0.0103354	FDR < 0.10	100.673
ENSG00000183813	CCR4	protein_coding	451.559	0.280558	2.96717	0.0030055	0.0192033	FDR < 0.10	7.95643
ENSG00000122359	ANXA11	protein_coding	12635.9	0.280265	2.34838	0.0188553	0.0739955	FDR < 0.10	397.263
ENSG00000175970	UNC119B	protein_coding	913.459	0.28023	3.15574	0.00160093	0.0120519	FDR < 0.10	11.3664
ENSG00000153786	ZDHHC7	protein_coding	2489.41	0.280184	3.07841	0.0020811	0.0146048	FDR < 0.10	45.8614
ENSG00000186074	CD300LF	protein_coding	1987.15	0.280021	2.88637	0.00389714	0.0234528	FDR < 0.10	69.2
ENSG00000154305	MIA3	protein_coding	1398.86	0.279711	3.55318	0.000380608	0.00392232	FDR < 0.10	34.1471
ENSG00000169221	TBC1D10B	protein_coding	2237.95	0.279632	2.68037	0.00735403	0.0376755	FDR < 0.10	38.8957
ENSG00000090487	SPG21	protein_coding	2562.01	0.279413	2.90569	0.00366444	0.022342	FDR < 0.10	83.0986
ENSG00000136830	FAM129B	protein_coding	844.528	0.279402	2.44271	0.0145776	0.0616787	FDR < 0.10	12.6157
ENSG00000129534	MIS18BP1	protein_coding	582.343	0.279186	2.83706	0.00455305	0.026185	FDR < 0.10	15.78
ENSG00000120656	TAF12	protein_coding	754.393	0.279162	3.13954	0.00169215	0.0125689	FDR < 0.10	34.52
ENSG00000134371	CDC73	protein_coding	618.693	0.279116	3.38629	0.000708434	0.00635143	FDR < 0.10	6.745
ENSG00000186432	KPNA4	protein_coding	1629.71	0.278996	3.299	0.000970316	0.00815145	FDR < 0.10	11.2921
ENSG00000110697	PITPNM1	protein_coding	3832.6	0.278977	2.67073	0.00756862	0.038473	FDR < 0.10	63.9086
ENSG00000241399	CD302	protein_coding	2190.47	0.278903	2.4423	0.0145942	0.0617009	FDR < 0.10	31.4579
ENSG00000198964	SGMS1	protein_coding	523.033	0.278584	2.97011	0.00297695	0.0190453	FDR < 0.10	11.1779
ENSG00000117614	SYF2	protein_coding	1952.26	0.278234	4.07739	4.55449e-05	0.000802546	FDR < 0.10	86.3907
ENSG00000058799	YIPF1	protein_coding	824.416	0.278034	2.7006	0.00692136	0.0360017	FDR < 0.10	29.3457
ENSG00000143437	ARNT	protein_coding	1290.36	0.277698	3.37931	0.000726687	0.0064825	FDR < 0.10	18.7507
ENSG00000169895	SYAP1	protein_coding	713.697	0.277657	2.67122	0.00755769	0.0384704	FDR < 0.10	6.26786
ENSG00000103489	XYLT1	protein_coding	1086.16	0.277476	3.0424	0.00234703	0.0159141	FDR < 0.10	6.19
ENSG00000135679	MDM2	protein_coding	1431.06	0.277455	2.52612	0.011533	0.0519182	FDR < 0.10	17.1957
ENSG00000168394	TAP1	protein_coding	9598.48	0.277353	2.55918	0.0104919	0.0486363	FDR < 0.10	180.404
ENSG00000131242	RAB11FIP4	protein_coding	2724.8	0.277072	2.35772	0.0183878	0.0727561	FDR < 0.10	29.6157
ENSG00000150991	UBC	protein_coding	50008.8	0.277039	3.85832	0.000114171	0.00159138	FDR < 0.10	1366.41
ENSG00000167173	C15orf39	protein_coding	8842.6	0.276957	2.23556	0.0253808	0.0923425	FDR < 0.10	111.224
ENSG00000267303	CTD-2369P2.12	protein_coding	526.865	0.276943	2.75452	0.00587775	0.0317296	FDR < 0.10	16.0743
ENSG00000125952	MAX	protein_coding	4548.67	0.276907	2.92446	0.00345057	0.0213204	FDR < 0.10	157.669
ENSG00000106665	CLIP2	protein_coding	465.091	0.276725	2.83207	0.00462473	0.0264883	FDR < 0.10	4.71857
ENSG00000186591	UBE2H	protein_coding	2577.66	0.27654	3.2892	0.00100472	0.00837638	FDR < 0.10	28.53
ENSG00000239305	RNF103	protein_coding	683.635	0.276515	2.53962	0.0110972	0.0506134	FDR < 0.10	10.8707
ENSG00000136827	TOR1A	protein_coding	1057.1	0.276502	3.03052	0.00244134	0.0163669	FDR < 0.10	29.1243
ENSG00000101290	CDS2	protein_coding	2575.68	0.276435	2.57573	0.0100029	0.0470105	FDR < 0.10	28.5357
ENSG00000115128	SF3B6	protein_coding	1093.56	0.276375	3.2157	0.00130126	0.0102049	FDR < 0.10	93.0379
ENSG00000076944	STXBP2	protein_coding	8193.04	0.275835	2.2109	0.0270429	0.0965198	FDR < 0.10	334.767
ENSG00000032444	PNPLA6	protein_coding	2570.28	0.275658	3.53479	0.000408094	0.00413688	FDR < 0.10	62.4564
ENSG00000138433	CIR1	protein_coding	2270.68	0.27561	2.3505	0.0187482	0.0737103	FDR < 0.10	69.9686
ENSG00000162434	JAK1	protein_coding	9795.32	0.275573	2.66404	0.00772072	0.0389529	FDR < 0.10	123.875
ENSG00000111737	RAB35	protein_coding	2616.22	0.275324	3.02441	0.00249118	0.016623	FDR < 0.10	54.9521
ENSG00000114030	KPNA1	protein_coding	1353.14	0.275126	2.40923	0.015986	0.0657117	FDR < 0.10	25.5643
ENSG00000177628	GBA	protein_coding	1721.62	0.274752	2.37618	0.0174931	0.0702529	FDR < 0.10	46.9686
ENSG00000204842	ATXN2	protein_coding	421.434	0.274279	2.47603	0.0132853	0.0573597	FDR < 0.10	10.6336
ENSG00000129625	REEP5	protein_coding	2343.27	0.274275	3.57724	0.00034724	0.00364156	FDR < 0.10	96.3229
ENSG00000167065	DUSP18	protein_coding	275.789	0.274054	2.25859	0.023909	0.0884765	FDR < 0.10	7.84429
ENSG00000163848	ZNF148	protein_coding	992.441	0.273992	3.12103	0.00180218	0.0131506	FDR < 0.10	10.3207
ENSG00000062650	WAPL	protein_coding	1702.67	0.27399	3.53276	0.000411239	0.00415401	FDR < 0.10	21.0136
ENSG00000173221	GLRX	protein_coding	2821.95	0.273977	3.25519	0.00113316	0.00915831	FDR < 0.10	156.15
ENSG00000119541	VPS4B	protein_coding	2151.09	0.273767	3.22826	0.00124544	0.00985921	FDR < 0.10	39.0764
ENSG00000176853	FAM91A1	protein_coding	1033.8	0.273522	2.69672	0.00700253	0.0362916	FDR < 0.10	14.8436
ENSG00000145901	TNIP1	protein_coding	8895.56	0.273427	2.26544	0.0234854	0.0872936	FDR < 0.10	189.895
ENSG00000119522	DENND1A	protein_coding	1038.6	0.273315	3.15883	0.00158405	0.0119562	FDR < 0.10	14.1936
ENSG00000163904	SENP2	protein_coding	715.973	0.273246	3.20291	0.00136047	0.0105622	FDR < 0.10	14.4543
ENSG00000116473	RAP1A	protein_coding	3536.29	0.273153	3.41435	0.000639352	0.00584267	FDR < 0.10	134.556
ENSG00000213523	SRA1	protein_coding	1068.02	0.273074	2.61658	0.00888151	0.043191	FDR < 0.10	39.5186
ENSG00000197111	PCBP2	protein_coding	13754.7	0.272892	3.50958	0.000448807	0.00443924	FDR < 0.10	582.073
ENSG00000105953	OGDH	protein_coding	3068.74	0.272754	3.62759	0.000286081	0.00315552	FDR < 0.10	42.1107
ENSG00000114416	FXR1	protein_coding	1215.35	0.272599	3.09671	0.00195682	0.0140209	FDR < 0.10	36.0764
ENSG00000143761	ARF1	protein_coding	12874.7	0.272565	3.42508	0.000614613	0.00567057	FDR < 0.10	420.391
ENSG00000121067	SPOP	protein_coding	1488.56	0.272472	3.62406	0.000290013	0.00319148	FDR < 0.10	48.2493
ENSG00000062194	GPBP1	protein_coding	2351.03	0.272472	3.71861	0.000200319	0.00240265	FDR < 0.10	54.1514
ENSG00000141027	NCOR1	protein_coding	2924.47	0.272432	3.88055	0.000104219	0.00148751	FDR < 0.10	38.7693
ENSG00000104763	ASAH1	protein_coding	6589.4	0.272365	3.0165	0.00255715	0.0169365	FDR < 0.10	199.036
ENSG00000146457	WTAP	protein_coding	2330.53	0.271977	3.98574	6.72699e-05	0.00106564	FDR < 0.10	70.1493
ENSG00000108100	CCNY	protein_coding	3521.2	0.271661	3.60597	0.000310987	0.00336522	FDR < 0.10	88.3814
ENSG00000111011	RSRC2	protein_coding	1221.64	0.271645	3.23723	0.00120696	0.00962939	FDR < 0.10	39.52
ENSG00000198399	ITSN2	protein_coding	1939.34	0.271533	2.45129	0.0142345	0.0605752	FDR < 0.10	27.2421
ENSG00000138386	NAB1	protein_coding	619.476	0.271421	2.96987	0.00297926	0.0190515	FDR < 0.10	11.7586
ENSG00000148925	BTBD10	protein_coding	841.42	0.271167	2.82016	0.00479992	0.0272295	FDR < 0.10	22.7536
ENSG00000116539	ASH1L	protein_coding	1250.35	0.271143	3.33575	0.000850685	0.00734096	FDR < 0.10	6.53
ENSG00000171943	SRGAP2C	protein_coding	265.984	0.2711	2.19956	0.0278383	0.0984968	FDR < 0.10	2.76857
ENSG00000150403	TMCO3	protein_coding	923.62	0.270676	2.4247	0.0153209	0.0637721	FDR < 0.10	20.4421
ENSG00000064999	ANKS1A	protein_coding	749.113	0.27054	2.21411	0.026821	0.0960823	FDR < 0.10	6.27
ENSG00000118217	ATF6	protein_coding	1496.89	0.270022	3.35845	0.000783795	0.00688861	FDR < 0.10	10.5507
ENSG00000101367	MAPRE1	protein_coding	2864.81	0.269982	3.78566	0.000153298	0.00199638	FDR < 0.10	60.2329
ENSG00000129226	CD68	protein_coding	6455.01	0.269253	2.98242	0.00285978	0.0184611	FDR < 0.10	240.826
ENSG00000008256	CYTH3	protein_coding	407.86	0.269168	2.74092	0.00612666	0.0327512	FDR < 0.10	5.05571
ENSG00000104765	BNIP3L	protein_coding	3654.57	0.269085	2.41609	0.0156881	0.0648562	FDR < 0.10	163.421
ENSG00000171497	PPID	protein_coding	758.19	0.268787	3.24613	0.00116984	0.00938565	FDR < 0.10	24.1479
ENSG00000172183	ISG20	protein_coding	4151.43	0.268769	2.42303	0.0153917	0.0639925	FDR < 0.10	335.048
ENSG00000105053	VRK3	protein_coding	1578.52	0.268417	2.64384	0.00819725	0.0407096	FDR < 0.10	58.2993
ENSG00000180198	RCC1	protein_coding	400.083	0.268172	2.83425	0.00459333	0.0263402	FDR < 0.10	10.5493
ENSG00000111321	LTBR	protein_coding	1732.27	0.268113	2.29781	0.0215727	0.0821088	FDR < 0.10	50.4907
ENSG00000169372	CRADD	protein_coding	188.407	0.268051	2.24137	0.0250023	0.0913901	FDR < 0.10	10.6179
ENSG00000275895	U2AF1L5	protein_coding	1014.07	0.267184	2.67685	0.00743172	0.0379374	FDR < 0.10	66.215
ENSG00000120733	KDM3B	protein_coding	3490.87	0.267172	2.37231	0.0176773	0.0708333	FDR < 0.10	38.9414
ENSG00000108960	MMD	protein_coding	853.481	0.267037	2.25026	0.0244327	0.0899014	FDR < 0.10	26.4536
ENSG00000127838	PNKD	protein_coding	1105.29	0.266782	2.79853	0.00513361	0.0286779	FDR < 0.10	42.3707
ENSG00000182149	IST1	protein_coding	4943.64	0.266742	3.17063	0.00152107	0.0115617	FDR < 0.10	201.374
ENSG00000069849	ATP1B3	protein_coding	934.247	0.266544	2.38876	0.0169053	0.0684799	FDR < 0.10	32.5064
ENSG00000179119	SPTY2D1	protein_coding	881.179	0.266194	3.13633	0.00171077	0.0126582	FDR < 0.10	10.645
ENSG00000096070	BRPF3	protein_coding	1188.36	0.265872	2.32552	0.0200443	0.0777718	FDR < 0.10	14.8864
ENSG00000165494	PCF11	protein_coding	1950.43	0.265782	2.3904	0.0168298	0.0682809	FDR < 0.10	24.7207
[truncated: 1,775 more rows]

## Sheet: protein DE, TPM > 10
Ensembl	Symbol	Gene_type	baseMean	log2FoldChange	stat	pvalue	padj	Significant	Mean_TPM
ENSG00000159713	TPPP3	protein_coding	421.008	1.52874	10.554	4.8658e-26	2.31498e-22	FDR < 0.10	23.6564
ENSG00000170345	FOS	protein_coding	5387.16	1.3438	8.50004	1.89522e-17	1.22956e-14	FDR < 0.10	146.854
ENSG00000179820	MYADM	protein_coding	14156	1.32008	10.3484	4.25674e-25	1.51891e-21	FDR < 0.10	318.021
ENSG00000182885	ADGRG3	protein_coding	5113.95	1.26747	4.38383	1.16613e-05	0.000274656	FDR < 0.10	111.254
ENSG00000186205	MARC1	protein_coding	1439.6	1.22664	6.1539	7.56e-10	9.9911e-08	FDR < 0.10	46.5471
ENSG00000059804	SLC2A3	protein_coding	9659.06	1.21973	6.88304	5.85888e-12	1.30662e-09	FDR < 0.10	165.869
ENSG00000184557	SOCS3	protein_coding	1363.2	1.2036	9.84148	7.4607e-23	1.62173e-19	FDR < 0.10	27.1171
ENSG00000159339	PADI4	protein_coding	4929.78	1.19919	3.2726	0.00106561	0.00876124	FDR < 0.10	172.319
ENSG00000183019	MCEMP1	protein_coding	544.368	1.19485	9.64166	5.33185e-22	9.51269e-19	FDR < 0.10	19.2671
ENSG00000124731	TREM1	protein_coding	6972.55	1.19176	8.96188	3.19178e-19	3.03709e-16	FDR < 0.10	345.554
ENSG00000196411	EPHB4	protein_coding	997.269	1.17769	6.55364	5.61513e-11	1.00181e-08	FDR < 0.10	15.1607
ENSG00000225873	LINC00694	protein_coding	560.663	1.14392	5.90678	3.48849e-09	3.58211e-07	FDR < 0.10	43.8471
ENSG00000100985	MMP9	protein_coding	7835.99	1.13739	2.68615	0.00722808	0.0371503	FDR < 0.10	182.287
ENSG00000196352	CD55	protein_coding	6172.82	1.11971	9.08141	1.07177e-19	1.27478e-16	FDR < 0.10	162.634
ENSG00000171236	LRG1	protein_coding	4083.9	1.1102	4.17564	2.97152e-05	0.000583202	FDR < 0.10	76.3893
ENSG00000163421	PROK2	protein_coding	3315.86	1.08344	8.12224	4.57646e-16	2.29198e-13	FDR < 0.10	133.676
ENSG00000138772	ANXA3	protein_coding	878.03	1.0761	7.39874	1.37482e-13	4.26582e-11	FDR < 0.10	31.87
ENSG00000115828	QPCT	protein_coding	4031.61	1.07041	6.22705	4.75284e-10	6.85226e-08	FDR < 0.10	135.851
ENSG00000140379	BCL2A1	protein_coding	2149.39	1.06244	8.1172	4.77049e-16	2.29198e-13	FDR < 0.10	127.59
ENSG00000075426	FOSL2	protein_coding	7012.25	1.05917	6.75644	1.41419e-11	2.88353e-09	FDR < 0.10	73.5164
ENSG00000149798	CDC42EP2	protein_coding	2168.62	1.05118	7.78359	7.04973e-15	2.71948e-12	FDR < 0.10	59.3543
ENSG00000113916	BCL6	protein_coding	8818.2	1.03889	5.47603	4.34977e-08	3.0138e-06	FDR < 0.10	167.316
ENSG00000113368	LMNB1	protein_coding	2071.55	1.03318	8.89492	5.84593e-19	5.21493e-16	FDR < 0.10	76.6521
ENSG00000186431	FCAR	protein_coding	1059.15	1.0326	5.44831	5.08515e-08	3.37583e-06	FDR < 0.10	49.79
ENSG00000112303	VNN2	protein_coding	23830.8	1.03239	6.61672	3.67262e-11	7.23833e-09	FDR < 0.10	722.698
ENSG00000102445	RUBCNL	protein_coding	2065.91	1.0293	5.56593	2.60754e-08	2.01175e-06	FDR < 0.10	51.5943
ENSG00000069399	BCL3	protein_coding	2991.11	1.02233	6.24635	4.2016e-10	6.11933e-08	FDR < 0.10	100.084
ENSG00000196549	MME	protein_coding	9253.51	1.02209	3.68764	0.000226348	0.00262869	FDR < 0.10	138.96
ENSG00000187116	LILRA5	protein_coding	3590.53	1.01728	8.25874	1.47216e-16	8.40483e-14	FDR < 0.10	161.138
ENSG00000093134	VNN3	protein_coding	1310.71	1.016	5.21971	1.79203e-07	9.61564e-06	FDR < 0.10	47.4814
ENSG00000257335	MGAM	protein_coding	8894.77	1.01088	3.691	0.000223376	0.00260691	FDR < 0.10	57.5436
ENSG00000132965	ALOX5AP	protein_coding	8028.61	1.01023	5.50288	3.73643e-08	2.69344e-06	FDR < 0.10	550.464
ENSG00000138678	GPAT3	protein_coding	1279.85	0.996596	5.79103	6.99569e-09	6.48373e-07	FDR < 0.10	32.1093
ENSG00000165801	ARHGEF40	protein_coding	3335.91	0.993337	8.5817	9.3485e-18	6.35387e-15	FDR < 0.10	66.3529
ENSG00000116741	RGS2	protein_coding	27663.3	0.97728	6.5179	7.12989e-11	1.24104e-08	FDR < 0.10	1198.1
ENSG00000158470	B4GALT5	protein_coding	3439.95	0.969328	7.28299	3.2651e-13	9.51078e-11	FDR < 0.10	38.5407
ENSG00000163235	TGFA	protein_coding	759.57	0.965949	5.54155	2.99804e-08	2.24362e-06	FDR < 0.10	10.7693
ENSG00000059728	MXD1	protein_coding	18829.4	0.965778	5.33136	9.74777e-08	5.72551e-06	FDR < 0.10	255.203
ENSG00000136630	HLX	protein_coding	1771.29	0.965398	5.37875	7.50041e-08	4.69532e-06	FDR < 0.10	55.9064
ENSG00000078804	TP53INP2	protein_coding	866.695	0.960442	5.39648	6.79607e-08	4.30357e-06	FDR < 0.10	11.2214
ENSG00000144655	CSRNP1	protein_coding	1430.85	0.958062	7.62352	2.4685e-14	8.80821e-12	FDR < 0.10	24.4507
ENSG00000170525	PFKFB3	protein_coding	1829.85	0.957105	6.49866	8.10405e-11	1.3936e-08	FDR < 0.10	26.0936
ENSG00000143409	MINDY1	protein_coding	3070.53	0.955014	6.32409	2.54729e-10	4.03971e-08	FDR < 0.10	70.7186
ENSG00000145491	ROPN1L	protein_coding	297.828	0.951938	5.58404	2.34991e-08	1.85305e-06	FDR < 0.10	16.7
ENSG00000186529	CYP4F3	protein_coding	4151.83	0.951144	2.77777	0.00547333	0.0301844	FDR < 0.10	58.805
ENSG00000123405	NFE2	protein_coding	7530.65	0.950409	5.48469	4.14187e-08	2.92046e-06	FDR < 0.10	241.891
ENSG00000135604	STX11	protein_coding	2815.77	0.94819	7.95632	1.77226e-15	7.43983e-13	FDR < 0.10	81.5414
ENSG00000158373	HIST1H2BD	protein_coding	229.335	0.948046	5.81851	5.93734e-09	5.72592e-07	FDR < 0.10	21.8264
ENSG00000160179	ABCG1	protein_coding	1243.14	0.943329	5.6352	1.74856e-08	1.43432e-06	FDR < 0.10	24.16
ENSG00000254788	CKLF-CMTM1	protein_coding	93.3724	0.938756	3.18405	0.0014523	0.0111445	FDR < 0.10	11.2314
ENSG00000131873	CHSY1	protein_coding	1438.6	0.936575	8.72681	2.61946e-18	1.96776e-15	FDR < 0.10	22.5593
ENSG00000229314	ORM1	protein_coding	371.68	0.932247	4.48058	7.44415e-06	0.000193183	FDR < 0.10	30.23
ENSG00000136867	SLC31A2	protein_coding	2042.06	0.930563	11.2251	3.06945e-29	2.19051e-25	FDR < 0.10	65.2157
ENSG00000011198	ABHD5	protein_coding	2018.21	0.916051	5.6697	1.43048e-08	1.20812e-06	FDR < 0.10	72.7957
ENSG00000204131	NHSL2	protein_coding	3819.03	0.905238	6.61554	3.70208e-11	7.23833e-09	FDR < 0.10	25.9707
ENSG00000151726	ACSL1	protein_coding	15713	0.900534	3.40532	0.00066086	0.00601176	FDR < 0.10	234.766
ENSG00000089505	CMTM1	protein_coding	142.001	0.895546	3.74398	0.000181125	0.00222096	FDR < 0.10	10.6264
ENSG00000148926	ADM	protein_coding	1353.76	0.894672	4.77545	1.79302e-06	6.30338e-05	FDR < 0.10	59.3121
ENSG00000204389	HSPA1A	protein_coding	14022.8	0.889891	5.40597	6.44578e-08	4.12559e-06	FDR < 0.10	313.229
ENSG00000165030	NFIL3	protein_coding	1913.41	0.889402	6.03157	1.62372e-09	1.88417e-07	FDR < 0.10	50.7093
ENSG00000156675	RAB11FIP1	protein_coding	12543.6	0.888388	6.7682	1.30395e-11	2.69729e-09	FDR < 0.10	109.281
ENSG00000196083	IL1RAP	protein_coding	1622.03	0.887589	8.11203	4.97802e-16	2.29198e-13	FDR < 0.10	25.6157
ENSG00000087074	PPP1R15A	protein_coding	4475.31	0.876883	6.94718	3.72667e-12	8.57915e-10	FDR < 0.10	103.666
ENSG00000171049	FPR2	protein_coding	8748.86	0.868675	5.13918	2.75936e-07	1.37153e-05	FDR < 0.10	269.061
ENSG00000103569	AQP9	protein_coding	21179.9	0.866024	5.47389	4.4026e-08	3.03567e-06	FDR < 0.10	381.845
ENSG00000243660	ZNF487	protein_coding	229.467	0.865628	6.25537	3.96571e-10	5.83532e-08	FDR < 0.10	10.56
ENSG00000157551	KCNJ15	protein_coding	5543.18	0.862175	4.91363	8.94075e-07	3.56456e-05	FDR < 0.10	121.186
ENSG00000167536	DHRS13	protein_coding	864.463	0.858324	7.06105	1.65248e-12	4.13787e-10	FDR < 0.10	26.9814
ENSG00000160588	MPZL3	protein_coding	2625.97	0.854857	5.51865	3.41607e-08	2.51877e-06	FDR < 0.10	39.305
ENSG00000057704	TMCC3	protein_coding	2592.24	0.854562	5.47078	4.48059e-08	3.07459e-06	FDR < 0.10	27.1
ENSG00000173535	TNFRSF10C	protein_coding	14734.7	0.853555	5.23266	1.67085e-07	9.10229e-06	FDR < 0.10	518.68
ENSG00000106780	MEGF9	protein_coding	10560.2	0.851837	5.54734	2.90052e-08	2.20208e-06	FDR < 0.10	87.5271
ENSG00000103196	CRISPLD2	protein_coding	4340.12	0.851582	2.54375	0.0109669	0.0502024	FDR < 0.10	53.6793
ENSG00000079385	CEACAM1	protein_coding	818.066	0.849683	5.17909	2.2297e-07	1.16573e-05	FDR < 0.10	15.0614
ENSG00000170837	GPR27	protein_coding	939.235	0.849412	5.37896	7.49187e-08	4.69532e-06	FDR < 0.10	20.8821
ENSG00000197208	SLC22A4	protein_coding	468.953	0.845685	5.57758	2.43886e-08	1.90218e-06	FDR < 0.10	13.5021
ENSG00000173281	PPP1R3B	protein_coding	3356.68	0.844441	5.06703	4.04079e-07	1.85448e-05	FDR < 0.10	31.8057
ENSG00000265118	CTD-2370N5.3	protein_coding	247.938	0.838031	3.23684	0.0012086	0.0096371	FDR < 0.10	15.8
ENSG00000101236	RNF24	protein_coding	6533.5	0.835637	4.44446	8.81115e-06	0.000219479	FDR < 0.10	51.0793
ENSG00000112195	TREML2	protein_coding	3221.86	0.835114	6.07948	1.20569e-09	1.50955e-07	FDR < 0.10	52.3107
ENSG00000110203	FOLR3	protein_coding	2475.07	0.834631	5.9394	2.86061e-09	3.0667e-07	FDR < 0.10	196.522
ENSG00000189067	LITAF	protein_coding	33911	0.832808	6.4122	1.4343e-10	2.35308e-08	FDR < 0.10	933.262
ENSG00000146592	CREB5	protein_coding	3059.02	0.829781	4.90116	9.52702e-07	3.73569e-05	FDR < 0.10	38.0843
ENSG00000139112	GABARAPL1	protein_coding	2336.28	0.826588	5.86433	4.50959e-09	4.50108e-07	FDR < 0.10	69.1443
ENSG00000188313	PLSCR1	protein_coding	886.216	0.825873	8.30557	9.9339e-17	5.90777e-14	FDR < 0.10	47.2614
ENSG00000163625	WDFY3	protein_coding	1899.12	0.82349	4.93281	8.10551e-07	3.28664e-05	FDR < 0.10	17.42
ENSG00000163993	S100P	protein_coding	3496.67	0.818174	4.58191	4.60743e-06	0.000135592	FDR < 0.10	513.764
ENSG00000115919	KYNU	protein_coding	475.426	0.817754	4.81872	1.44484e-06	5.37037e-05	FDR < 0.10	17.2014
ENSG00000121552	CSTA	protein_coding	1701.71	0.817242	7.3215	2.45215e-13	7.29158e-11	FDR < 0.10	147.856
ENSG00000123146	ADGRE5	protein_coding	27435.2	0.81264	7.48276	7.27795e-14	2.41577e-11	FDR < 0.10	598.931
ENSG00000170458	CD14	protein_coding	10044.3	0.81121	8.08176	6.38401e-16	2.84747e-13	FDR < 0.10	348.814
ENSG00000162747	FCGR3B	protein_coding	105210	0.811165	2.91105	0.00360214	0.0220574	FDR < 0.10	3131.4
ENSG00000166130	IKBIP	protein_coding	1330.02	0.810539	6.80523	1.00891e-11	2.14928e-09	FDR < 0.10	33.7321
ENSG00000108582	CPD	protein_coding	4141.81	0.808025	5.24528	1.56042e-07	8.59919e-06	FDR < 0.10	33.7971
ENSG00000127946	HIP1	protein_coding	2118.03	0.805505	4.58882	4.45753e-06	0.000132516	FDR < 0.10	13.9371
ENSG00000113303	BTNL8	protein_coding	892.655	0.8048	4.9665	6.81716e-07	2.82853e-05	FDR < 0.10	33.3543
ENSG00000135046	ANXA1	protein_coding	8010.25	0.804553	7.36009	1.83784e-13	5.58116e-11	FDR < 0.10	312.199
ENSG00000142405	NLRP12	protein_coding	2940.57	0.80388	4.95631	7.18455e-07	2.95519e-05	FDR < 0.10	41.875
ENSG00000122862	SRGN	protein_coding	40210.2	0.801351	8.11525	4.84789e-16	2.29198e-13	FDR < 0.10	1991.04
ENSG00000106714	CNTNAP3	protein_coding	693.736	0.800573	5.14134	2.7278e-07	1.36133e-05	FDR < 0.10	10.42
ENSG00000182782	HCAR2	protein_coding	2562.11	0.799083	5.28033	1.28949e-07	7.24601e-06	FDR < 0.10	69.0314
ENSG00000127951	FGL2	protein_coding	15093.9	0.798712	9.24969	2.25152e-20	2.92144e-17	FDR < 0.10	282.772
ENSG00000180953	ST20	protein_coding	260.608	0.797756	3.60215	0.000315592	0.0034051	FDR < 0.10	29.8721
ENSG00000158825	CDA	protein_coding	4011.59	0.797737	4.41022	1.03268e-05	0.000250244	FDR < 0.10	265.08
ENSG00000175274	TP53I11	protein_coding	2608.76	0.795931	2.96559	0.00302102	0.0192663	FDR < 0.10	51.7307
ENSG00000176788	BASP1	protein_coding	11556.2	0.795208	5.44897	5.06631e-08	3.37583e-06	FDR < 0.10	342.89
ENSG00000143878	RHOB	protein_coding	4266.27	0.794282	5.89234	3.80769e-09	3.82726e-07	FDR < 0.10	98.4757
ENSG00000188895	MSL1	protein_coding	10409.2	0.793917	5.28281	1.27216e-07	7.17687e-06	FDR < 0.10	181.489
ENSG00000230257	NFE4	protein_coding	423.039	0.787644	4.73336	2.2083e-06	7.48672e-05	FDR < 0.10	24.5843
ENSG00000198734	F5	protein_coding	1399.68	0.787521	4.53518	5.75541e-06	0.000160992	FDR < 0.10	20.1929
ENSG00000198604	BAZ1A	protein_coding	3401.24	0.780305	8.61712	6.86591e-18	4.89986e-15	FDR < 0.10	41.6021
ENSG00000180871	CXCR2	protein_coding	45592.9	0.780023	4.8532	1.21485e-06	4.5751e-05	FDR < 0.10	1014.34
ENSG00000131759	RARA	protein_coding	6686.9	0.779124	5.17248	2.31002e-07	1.1946e-05	FDR < 0.10	153.203
ENSG00000163221	S100A12	protein_coding	5519.41	0.77677	4.87755	1.07409e-06	4.1211e-05	FDR < 0.10	785.56
ENSG00000146859	TMEM140	protein_coding	4628.94	0.775616	5.27044	1.36094e-07	7.58776e-06	FDR < 0.10	128.853
ENSG00000116729	WLS	protein_coding	2207.25	0.774609	5.11235	3.18181e-07	1.52909e-05	FDR < 0.10	60.67
ENSG00000100504	PYGL	protein_coding	8200.39	0.774057	4.20757	2.58132e-05	0.000522836	FDR < 0.10	170.609
ENSG00000158769	F11R	protein_coding	4624.71	0.7717	5.35629	8.49467e-08	5.18138e-06	FDR < 0.10	72.015
ENSG00000105835	NAMPT	protein_coding	47883.8	0.77094	5.12473	2.97958e-07	1.44652e-05	FDR < 0.10	1302.52
ENSG00000072952	MRVI1	protein_coding	1897.8	0.769306	5.22967	1.69815e-07	9.18092e-06	FDR < 0.10	17.3279
ENSG00000100644	HIF1A	protein_coding	3049.62	0.768224	5.32724	9.97147e-08	5.8329e-06	FDR < 0.10	66.9814
ENSG00000112096	SOD2	protein_coding	44359.7	0.762831	6.56473	5.21261e-11	9.41767e-09	FDR < 0.10	1289.14
ENSG00000117115	PADI2	protein_coding	6988.63	0.759562	2.64561	0.00815443	0.0405958	FDR < 0.10	86.4057
ENSG00000135636	DYSF	protein_coding	8598.3	0.757789	2.59991	0.0093248	0.0446381	FDR < 0.10	99.1736
ENSG00000008438	PGLYRP1	protein_coding	1277.05	0.756371	3.88636	0.00010176	0.00145712	FDR < 0.10	116.491
ENSG00000163464	CXCR1	protein_coding	32701.2	0.75519	4.74384	2.09707e-06	7.19507e-05	FDR < 0.10	716.971
ENSG00000197081	IGF2R	protein_coding	24538.1	0.755184	4.56152	5.07854e-06	0.000146436	FDR < 0.10	125.945
ENSG00000087903	RFX2	protein_coding	702.058	0.752141	5.92803	3.06584e-09	3.21755e-07	FDR < 0.10	14.4014
ENSG00000003402	CFLAR	protein_coding	11245.1	0.751836	6.08208	1.1863e-09	1.49842e-07	FDR < 0.10	177.195
ENSG00000183762	KREMEN1	protein_coding	1184.75	0.750522	4.25973	2.04671e-05	0.00043536	FDR < 0.10	11.4793
ENSG00000155090	KLF10	protein_coding	897.043	0.747584	7.87865	3.30945e-15	1.3121e-12	FDR < 0.10	15.6721
ENSG00000115590	IL1R2	protein_coding	2253.09	0.747322	4.32087	1.55415e-05	0.000346757	FDR < 0.10	106.084
ENSG00000103313	MEFV	protein_coding	5798.94	0.746413	4.60372	4.15014e-06	0.000123923	FDR < 0.10	91.7486
ENSG00000105514	RAB3D	protein_coding	6289.99	0.746351	4.57617	4.73571e-06	0.00013851	FDR < 0.10	78.7979
ENSG00000204388	HSPA1B	protein_coding	1275.17	0.745063	5.06965	3.98546e-07	1.83498e-05	FDR < 0.10	27.6621
ENSG00000203710	CR1	protein_coding	3821.71	0.743729	4.26134	2.03209e-05	0.000432896	FDR < 0.10	28.2786
ENSG00000259332	ST20-MTHFS	protein_coding	135.838	0.7435	3.18489	0.00144811	0.0111215	FDR < 0.10	11.6643
ENSG00000035664	DAPK2	protein_coding	1187.76	0.742993	2.4633	0.0137665	0.0590411	FDR < 0.10	31.0564
ENSG00000166523	CLEC4E	protein_coding	3624.06	0.735206	4.32897	1.49811e-05	0.00033913	FDR < 0.10	187.854
ENSG00000139832	RAB20	protein_coding	266.634	0.735046	4.39996	1.08268e-05	0.000259281	FDR < 0.10	10.0493
ENSG00000163297	ANTXR2	protein_coding	3207.49	0.734016	6.3123	2.74917e-10	4.2651e-08	FDR < 0.10	61.7414
ENSG00000128594	LRRC4	protein_coding	1929.91	0.733289	3.678	0.000235074	0.00271019	FDR < 0.10	31.7521
ENSG00000215114	UBXN2B	protein_coding	1907.28	0.73274	5.17805	2.24219e-07	1.16798e-05	FDR < 0.10	33.3879
ENSG00000067082	KLF6	protein_coding	9723.81	0.732213	6.88599	5.73885e-12	1.30017e-09	FDR < 0.10	135.489
ENSG00000149269	PAK1	protein_coding	7590.21	0.730594	4.96681	6.80643e-07	2.82853e-05	FDR < 0.10	172.839
ENSG00000148450	MSRB2	protein_coding	596.669	0.730535	6.36809	1.91394e-10	3.0694e-08	FDR < 0.10	28.4171
ENSG00000073756	PTGS2	protein_coding	893.415	0.730013	5.51307	3.52632e-08	2.56792e-06	FDR < 0.10	13.5271
ENSG00000184602	SNN	protein_coding	7401.84	0.728796	5.84863	4.95648e-09	4.90847e-07	FDR < 0.10	120.069
ENSG00000169891	REPS2	protein_coding	1336.34	0.728679	4.08132	4.47814e-05	0.000791045	FDR < 0.10	23.2871
ENSG00000135074	ADAM19	protein_coding	4194.92	0.728163	4.35415	1.33581e-05	0.000308014	FDR < 0.10	43.1793
ENSG00000163823	CCR1	protein_coding	2776.16	0.727353	7.72574	1.11209e-14	4.17706e-12	FDR < 0.10	55.1743
ENSG00000136869	TLR4	protein_coding	4808.92	0.726356	5.02987	4.90804e-07	2.15546e-05	FDR < 0.10	56.2643
ENSG00000117616	RSRP1	protein_coding	2939.23	0.726038	2.72015	0.00652519	0.0343288	FDR < 0.10	109.271
ENSG00000197405	C5AR1	protein_coding	17102.2	0.724884	4.73827	2.15552e-06	7.34265e-05	FDR < 0.10	416.406
ENSG00000166046	TCP11L2	protein_coding	1051.5	0.723934	5.49444	3.91955e-08	2.78327e-06	FDR < 0.10	32.7971
ENSG00000144802	NFKBIZ	protein_coding	1359.76	0.719887	6.0644	1.32449e-09	1.60495e-07	FDR < 0.10	25.0079
ENSG00000152061	RABGAP1L	protein_coding	2116.02	0.719105	7.55839	4.08093e-14	1.42066e-11	FDR < 0.10	38.3557
ENSG00000108244	KRT23	protein_coding	3481.97	0.718897	5.33671	9.46507e-08	5.62896e-06	FDR < 0.10	100.796
ENSG00000103381	CPPED1	protein_coding	14038	0.717779	5.91805	3.25777e-09	3.39403e-07	FDR < 0.10	233.264
ENSG00000161533	ACOX1	protein_coding	3333.17	0.717758	4.69124	2.71551e-06	8.70697e-05	FDR < 0.10	50.5271
ENSG00000148572	NRBF2	protein_coding	3252.76	0.716753	5.19727	2.02237e-07	1.06514e-05	FDR < 0.10	98.37
ENSG00000140932	CMTM2	protein_coding	4320.9	0.714817	4.50416	6.66351e-06	0.000179536	FDR < 0.10	571.21
ENSG00000173334	TRIB1	protein_coding	1087.64	0.713793	4.83713	1.31729e-06	4.90904e-05	FDR < 0.10	16.8386
ENSG00000255398	HCAR3	protein_coding	3270.86	0.713647	4.9408	7.78029e-07	3.16376e-05	FDR < 0.10	84.5057
ENSG00000120868	APAF1	protein_coding	3022.57	0.713539	5.11353	3.16194e-07	1.52468e-05	FDR < 0.10	29.3464
ENSG00000166579	NDEL1	protein_coding	4398.99	0.713468	4.9707	6.67123e-07	2.79233e-05	FDR < 0.10	134.859
ENSG00000171051	FPR1	protein_coding	40857.6	0.713435	4.58844	4.4658e-06	0.000132516	FDR < 0.10	1359.51
ENSG00000165175	MID1IP1	protein_coding	3716.35	0.712947	6.20325	5.53105e-10	7.75701e-08	FDR < 0.10	95.5371
ENSG00000140332	TLE3	protein_coding	9401.65	0.711874	4.7198	2.36076e-06	7.90967e-05	FDR < 0.10	184.086
ENSG00000182541	LIMK2	protein_coding	5068.14	0.711455	5.00486	5.59012e-07	2.41781e-05	FDR < 0.10	85.3293
ENSG00000127954	STEAP4	protein_coding	6206.27	0.711398	4.23794	2.25581e-05	0.000470718	FDR < 0.10	52.0243
ENSG00000120594	PLXDC2	protein_coding	2075.05	0.709779	5.34638	8.97329e-08	5.42694e-06	FDR < 0.10	28.595
ENSG00000164823	OSGIN2	protein_coding	996.395	0.708134	7.64243	2.13154e-14	7.80089e-12	FDR < 0.10	14.9557
ENSG00000075420	FNDC3B	protein_coding	1309.31	0.708101	5.10261	3.34996e-07	1.57283e-05	FDR < 0.10	15.7936
ENSG00000176845	METRNL	protein_coding	1621.95	0.707559	5.77852	7.53587e-09	6.89484e-07	FDR < 0.10	88.515
ENSG00000069974	RAB27A	protein_coding	3109.04	0.705969	7.4615	8.55411e-14	2.77484e-11	FDR < 0.10	110.589
ENSG00000163659	TIPARP	protein_coding	704.381	0.704099	6.79396	1.09098e-11	2.28993e-09	FDR < 0.10	12.5771
[truncated: 2,386 more rows]

## Sheet: protein DE, TPM > 100
Ensembl	Symbol	Gene_type	baseMean	log2FoldChange	stat	pvalue	padj	Significant	Mean_TPM
[truncated: 630 more rows]

[truncated: 1 more sheets: array filtered top DE]
