# Supplementary material for: RNA Sequencing of Whole Blood Defines the Signature of High Intensity Exercise at Altitude in Elite Speed Skaters
Source: Genes (Basel). 2022 Mar 24;13(4):574. doi: 10.3390/genes13040574 (PMC9027771; doi:10.3390/genes13040574)
Supplement: Supplementary file 1 [file genes-13-00574-s001.zip › Supplementary Table S4.xlsx]

## Sheet: fisher_H_up
ID	GeneRatio	BgRatio	pvalue	p.adjust	qvalue	Count	geneID
HALLMARK_TNFA_SIGNALING_VIA_NFKB	87/838	200/4383	4.47337e-16	2.23669e-14	1.27138e-14	87	CFLAR,PLAUR,CD44,MXD1,SLC2A3,KLF6,BCL3,ATP2B1,PTGS2,FOSL2,PPP1R15A,GADD45B,JAG1,TSC22D1,NFAT5,RIPK2,NAMPT,DDX58,EHD1,SOD2,VEGFA,HBEGF,BCL6,KYNU,PLEK,NFE2L2,RNF19B,TNFAIP3,SGK1,IFIT2,DUSP1,NR4A1,TNFAIP6,G0S2,CDKN1A,IRF1,IL1B,FOSB,ZFP36,SAT1,NINJ1,PTPRE,KDM6B,BTG1,BHLHE40,DRAM1,TANK,KLF4,IER3,BCL2A1,MCL1,RHOB,TNIP1,PNRC1,NR4A2,KLF10,ETS2,DUSP2,B4GALT5,IFNGR2,BTG2,IER2,ATF3,REL,TIPARP,CCNL1,CXCL1,AB…
HALLMARK_COMPLEMENT	71/838	200/4383	1.7346e-08	4.3365e-07	2.46496e-07	71	LAMP2,PLAUR,WAS,TIMP2,LCP2,HSPA5,DGKG,GNAI3,PSEN1,CD59,FCN1,BRPF3,TIMP1,CPQ,PIK3CG,EHD1,SH2B3,GNAI2,GNB4,GCA,KYNU,PLEK,CD46,CTSD,MMP8,TNFAIP3,CLU,LRP1,IRF1,RAF1,USP15,CPM,PRCP,CASP1,USP8,DUSP6,PIK3R5,SERPING1,PPP4C,CDA,FCER1G,CALM3,CTSS,S100A9,S100A12,CXCL1,PRKCD,ANXA5,CTSB,IRF2,ADAM9,GP9,ITGAM,CEBPB,GNB2,VCPIP1,RHOG,GRB2,GP1BA,GNG2,PLSCR1,CD55,CASP4,SERPINA1,SERPINB2,F5,MSRB1,CR1,HSPA1A,ANG,LYN
HALLMARK_APOPTOSIS	60/838	161/4383	3.11564e-08	5.19273e-07	2.95166e-07	60	CFLAR,CREBBP,BID,CD44,IFNGR1,TIMP2,CASP8,ROCK1,PPP2R5B,PSEN1,CYLD,DNAJA1,GADD45B,HMOX1,TSPO,TIMP1,DNAJC3,BNIP3L,HSPB1,CDKN1B,NEDD9,SOD2,ETF1,CLU,TNFSF10,CDKN1A,EREG,IRF1,IL1B,SAT1,PPT1,RARA,EMP1,ANXA1,RNASEL,IER3,CASP1,IFITM3,BCL10,MCL1,RHOB,PAK1,PDCD4,BTG2,LMNA,ATF3,HMGB2,CTNNB1,TAP1,PTK2,CD14,ISG20,RELA,DDIT3,JUN,DPYD,CASP4,IGF2R,GPX3,TXNIP
HALLMARK_INTERFERON_GAMMA_RESPONSE	67/838	200/4383	5.59647e-07	6.99559e-06	3.97644e-06	67	MVP,LCP2,EIF2AK2,CASP8,PTGS2,PSME1,CSF2RB,HIF1A,RIPK2,NAMPT,DDX58,SOD2,ST8SIA4,CD86,TNFAIP3,IFIT3,IFIT2,CD274,TRIM25,TNFSF10,NMI,TNFAIP6,NCOA3,ZNFX1,CDKN1A,IRF1,FGL2,BST2,TRIM21,BTG1,OASL,TRAFD1,SP110,TOR1B,CASP1,IFITM3,SERPING1,FCGR1A,LATS2,UBE2L6,MX1,IFNAR2,ADAR,GBP4,EIF4E3,B2M,IRF2,TAP1,STAT3,STAT2,FPR1,ISG20,SELP,MX2,SOCS3,PDE4B,IFITM2,PLSCR1,TDRD7,CASP4,PELI1,PSMB8,HLA-A,IFI30,APOL6,HLA-B,TX…
HALLMARK_INFLAMMATORY_RESPONSE	66/838	200/4383	1.25932e-06	1.25932e-05	7.15822e-06	66	PLAUR,TNFRSF1B,LCP2,KIF1B,EIF2AK2,MXD1,GNAI3,KLF6,ATP2B1,PVR,PSEN1,OSM,HIF1A,TIMP1,MEFV,AQP9,RIPK2,NAMPT,AHR,HBEGF,IL1R1,IL18R1,IL18RAP,TNFSF10,NMI,TNFAIP6,KCNJ2,CDKN1A,EREG,IRF1,IL1B,BST2,RAF1,PTPRE,ACVR1B,ABI1,SLC31A2,SLC31A1,PIK3R5,IFNAR1,ADM,IFNGR2,BTG2,ITGA5,NLRP3,PROK2,SGMS2,ABCA1,NOD2,PTAFR,CD14,FPR1,RELA,TLR1,RHOG,GPR132,PDE4B,GP1BA,IFITM1,SEMA4D,SELL,CD55,C5AR1,LYN,CLEC5A,ITGB3
HALLMARK_INTERFERON_ALPHA_RESPONSE	38/838	97/4383	2.79137e-06	2.32614e-05	1.32223e-05	38	EIF2AK2,CASP8,PSME1,RIPK2,IFIT3,IFIT2,ELF1,TRIM25,NMI,IRF1,BST2,TRIM21,OASL,TRAFD1,SP110,CASP1,PARP9,IFITM3,TMEM140,UBE2L6,MX1,ADAR,GBP2,GBP4,B2M,IRF2,TAP1,STAT2,ISG20,IFITM2,IFITM1,PLSCR1,SELL,TDRD7,PSMB8,HLA-C,IFI30,TXNIP
HALLMARK_HYPOXIA	64/838	200/4383	5.947e-06	4.24786e-05	2.41457e-05	64	IDS,PLAUR,RRAGD,HSPA5,SLC2A3,KLF6,PDK3,JMJD6,NDST1,FOSL2,PGM1,PPP1R15A,MAP3K1,HMOX1,MYH9,PGK1,NDRG1,BNIP3L,CDKN1B,GAPDH,TPI1,VEGFA,NR3C1,GBE1,KLHL24,KDM3A,HDLBP,KLF7,TNFAIP3,FOXO3,DUSP1,TGFBI,P4HA1,NAGK,CDKN1A,ZFP36,CDKN1C,SLC6A6,BTG1,BHLHE40,LDHA,IER3,PAM,PNRC1,ADM,ALDOA,HK1,SDC3,ATF3,TIPARP,NFIL3,FBP1,ATP7A,RBPJ,FOS,PFKFB3,GAA,ISG20,GLRX,DDIT3,JUN,EXT1,S100A4,ERO1A
HALLMARK_IL6_JAK_STAT3_SIGNALING	33/838	87/4383	2.78932e-05	0.000174332	9.90943e-05	33	CD44,IFNGR1,TNFRSF1B,BAK1,TNFRSF1A,HMOX1,CSF2RB,TGFB1,CBL,LTBR,STAM2,IL1R2,IL1R1,IL18R1,IRF1,IL1B,ACVR1B,PIK3R5,IFNAR1,IFNGR2,PF4,CXCL1,CCR1,STAT3,CD14,STAT2,JUN,IL17RA,GRB2,SOCS3,CSF2RA,IL10RB,ITGB3
HALLMARK_PROTEIN_SECRETION	33/838	96/4383	0.000259237	0.00144021	0.000818644	33	LAMP2,VAMP3,KIF1B,ARFGEF1,TSG101,STX7,SNAP23,MAPK1,GLA,RAB2A,STX12,VPS4B,STX16,PPT1,AP3B1,CD63,STAM,ADAM10,CLTC,ARF1,RAB5A,PAM,SEC24D,AP2M1,ARFIP1,ABCA1,ATP7A,COPB2,IGF2R,SGMS1,SNX2,ARFGAP3,SEC22B
HALLMARK_TGF_BETA_SIGNALING	21/838	54/4383	0.000539763	0.00269882	0.00153406	21	ARID4B,RHOA,PPP1R15A,FKBP1A,PPM1A,TGFB1,TGFBR1,ENG,UBE2D3,ACVR1,CDKN1C,APC,SKIL,THBS1,FURIN,KLF10,SKI,IFNGR2,CTNNB1,RAB31,JUNB
HALLMARK_REACTIVE_OXYGEN_SPECIES_PATHWAY	19/838	49/4383	0.00102554	0.00466153	0.00264971	19	SBNO2,IPCEF1,FTL,PDLIM1,SOD2,CAT,CDKN2D,LSP1,LAMTOR5,TXN,HHEX,G6PD,JUNB,OXSR1,GLRX,MSRA,MBP,GPX3,EGLN2
HALLMARK_P53_PATHWAY	56/838	200/4383	0.00114822	0.00478425	0.00271947	56	BAK1,MXD1,PPP1R15A,CCNK,MKNK2,HMOX1,ABHD4,TSC22D1,NDRG1,TGFB1,VDR,HBEGF,MAPKAPK3,RNF19B,CTSD,FOXO3,APAF1,CDKN1A,FGF13,SAT1,NINJ1,PTPRE,BTG1,TRAFD1,ACVR1B,MDM2,DRAM1,KLF4,IER3,CASP1,TOB1,EPHX1,XPC,BTG2,ATF3,TGFA,SERTAD3,TAP1,FOS,PPM1D,PLK3,DDIT3,BAIAP2,JUN,ABAT,TCN2,SP1,ZFP36L1,RXRA,HEXIM1,S100A4,GM2A,S100A10,TAX1BP3,IFI30,TXNIP
HALLMARK_UV_RESPONSE_UP	43/838	158/4383	0.0072562	0.0279085	0.0158638	43	FKBP4,BID,BAK1,RAB27A,PRKACA,MARK2,DNAJA1,CDC5L,HMOX1,SLC6A12,SOD2,SPR,NR4A1,AMD1,AGO2,IRF1,FOSB,TUBA4A,CDKN1C,PPT1,DNAJB1,BTG1,GGH,NUP58,TMBIM6,FURIN,ARRB2,CREG1,EPHX1,RHOB,ALDOA,HNRNPU,BTG2,ATF3,RPN1,PRKCD,TAP1,STIP1,FOS,JUNB,DGAT1,GPX3,LYN
HALLMARK_PI3K_AKT_MTOR_SIGNALING	30/838	105/4383	0.0114225	0.0407947	0.0231885	30	TNFRSF1A,GSK3B,MKNK2,MAPK1,DUSP3,UBE2D3,ARPC3,CDKN1B,PRKAR2A,PIKFYVE,ACTR3,RPS6KA1,CDKN1A,RAF1,CAB39,RAC1,ACTR2,CLTC,RIT1,ARF1,RALB,SLA,AP2M1,PRKCB,YWHAB,STAT2,DDIT3,GRB2,PLCB1,TBK1
HALLMARK_KRAS_SIGNALING_UP	51/838	200/4383	0.01403	0.0467668	0.0265832	51	TMEM176A,PLAUR,TNFRSF1B,SDCCAG8,EVI5,PTGS2,LAT2,PPP1R15A,MAP3K1,NIN,MMP9,TLR8,AVL9,TMEM176B,ENG,DNMBP,MMD,CBL,HBEGF,GALNT3,STRN,TNFAIP3,ARG1,SPP1,G0S2,F13A1,EREG,IL1B,GNG11,DOCK2,EMP1,LCP1,KLF4,DUSP6,ADAM17,RABGAP1L,LY96,FCER1G,ITGB2,LAPTM5,CTSS,PPBP,MTMR10,TOR1AIP2,GLRX,TRIB1,RBM4,ERO1A,CSF2RA,PSMB8,PECAM1
HALLMARK_ANDROGEN_RESPONSE	28/838	100/4383	0.0187194	0.0577402	0.0328207	28	ELOVL5,PIAS1,RRP12,GNAI3,ACTN1,XRCC5,VAPA,MYL12A,SMS,TSC22D1,NDRG1,ZMIZ1,CAMKK2,MAK,HMGCR,SGK1,ELL2,PTK2B,ACSL3,STEAP4,SAT1,ABHD2,IQGAP2,SEC24D,B2M,NKX3-1,TMEM50A,NCOA4
HALLMARK_MITOTIC_SPINDLE	50/838	199/4383	0.0196317	0.0577402	0.0328207	50	MARK4,PAFAH1B1,RALBP1,VCL,KIF1B,ARFGEF1,ROCK1,CDC42,CAPZB,KIF3C,CTTN,PXN,MYH9,NIN,MAPRE1,CYTH2,CLIP2,NEDD9,LMNB1,ECT2,ARHGEF2,ARAP3,PREX1,STAU1,TUBA4A,ACTN4,CLIP1,ARHGEF11,NOTCH2,DOCK2,APC,ABI1,FGD4,SSH2,CSNK1D,ARL8A,CDC42EP2,WASF2,EPB41,ABR,PPP4R2,RICTOR,MID1IP1,KIF5B,AKAP13,CDC42EP4,NF1,ITSN1,STK38L,MARCKS
HALLMARK_MTORC1_SIGNALING	50/838	200/4383	0.0214989	0.0597191	0.0339456	50	SKAP2,IFRD1,ADIPOR2,ELOVL5,HSPA5,SLC2A3,NFYC,PGM1,GSK3B,PPP1R15A,ATP6V1D,PGK1,GLA,NAMPT,UBE2D3,GAPDH,TPI1,HMGCR,GBE1,ACTR3,ETF1,COPS5,P4HA1,ACSL3,CDKN1A,CFP,TUBA4A,FGL2,SLC6A6,PSME3,BHLHE40,LDHA,RAB1A,ACTR2,IDH1,SEC11A,RIT1,ALDOA,SLA,BTG2,G6PD,ITGB2,RPN1,NFIL3,STIP1,GLRX,DDIT3,TBK1,ERO1A,IFI30
HALLMARK_ANGIOGENESIS	12/838	36/4383	0.0304238	0.0800626	0.0455093	12	PGLYRP1,VCAN,JAG1,TIMP1,VEGFA,SPP1,FSTL1,PF4,LRPAP1,PTK2,THBD,S100A4
HALLMARK_HEME_METABOLISM	49/838	200/4383	0.0321405	0.0803513	0.0456734	49	RBM5,LAMP2,GDE1,KDM7A,AGPAT4,ATP6V0A1,RNF19A,PPP2R5B,PICALM,MARK3,TNRC6B,KHNYN,LPIN2,BNIP3L,KLF3,HTATIP2,NR3C1,KAT2B,FOXO3,ELL2,YPEL5,CAT,NFE2,SEC14L1,MPP1,MKRN1,LMO2,USP15,VEZF1,SDCBP,CIR1,BMP2K,NARF,HDGF,MBOAT2,SIDT2,CAST,BACH1,EPB41,SYNJ1,BTG2,TAL1,CTSB,GAPVD1,FBXO34,SLC22A4,LRP10,TOP1,NCOA4
HALLMARK_COAGULATION	35/838	138/4383	0.0404444	0.0962961	0.0547367	35	LAMP2,SIRT2,MMP9,TIMP1,CPQ,VWF,SPARC,PLEK,MMP8,KLF7,CLU,LRP1,ANXA1,RAC1,THBS1,DUSP6,FURIN,MSRB2,SERPING1,SH2B2,PEF1,PF4,CTSB,ARF4,ADAM9,GP9,GNB2,THBD,PROS1,GP1BA,SERPINA1,SERPINB2,ANG,ITGB3,PECAM1
HALLMARK_IL2_STAT5_SIGNALING	48/838	199/4383	0.0433416	0.0985037	0.0559916	48	RRAGD,CD44,IFNGR1,TNFRSF1B,MXD1,SLC2A3,KLF6,GADD45B,CTSZ,NDRG1,AHR,ST3GAL4,CD86,IL1R2,IL18R1,WLS,SPP1,TNFSF10,GLIPR2,P4HA1,NCOA3,AHNAK,FGL2,CDKN1C,BHLHE40,EMP1,ADAM19,CKAP4,GABARAPL1,FURIN,IFITM3,RHOB,NFKBIZ,RABGAP1L,FAM126B,GBP4,MAPKAPK2,CTLA4,NFIL3,SMPDL3A,SELP,CCR4,DENND5A,PLSCR1,SELL,IGF2R,SH3BGRL2,AMACR
HALLMARK_ALLOGRAFT_REJECTION	48/838	200/4383	0.0468788	0.10191	0.057928	48	FGR,WAS,IFNGR1,LCP2,SPI1,BCL3,UBE2D1,FCGR2B,EIF4G3,PTPRC,NCF4,HIF1A,MMP9,ELF4,TIMP1,RIPK2,TGFB1,ST8SIA4,CD86,IL18RAP,CCR2,SRGN,EREG,IL1B,CFP,ABI1,IGSF6,GALNT1,BCL10,DEGS1,CD1D,IFNAR2,IFNGR2,ITGB2,GBP2,NLRP3,CTSS,PF4,CCR1,PRKCB,B2M,TAP1,TLR1,HCLS1,TAP2,HLA-E,HLA-A,LYN
HALLMARK_CHOLESTEROL_HOMEOSTASIS	18/838	74/4383	0.158501	0.33021	0.187699	18	PLAUR,PDK3,JAG1,HMGCR,CLU,CPEB2,PNRC1,CXCL16,STX5,ATF3,S100A11,ANTXR2,ANXA5,TP53INP1,NFIL3,CTNNB1,PLSCR1,ATXN2
HALLMARK_APICAL_JUNCTION	43/838	200/4383	0.214464	0.428928	0.243812	43	SKAP2,VCL,VCAN,CTNNA1,PIK3CB,CNN2,ACTN1,PTPRC,MAP3K20,MYH9,MMP9,MYL9,NECTIN1,VWF,MAPK14,CD86,GNAI2,MYL12B,CD274,TGFBI,VASP,YWHAH,RAC2,ARHGEF6,NECTIN2,ACTN4,CAP1,MSN,RSU1,SDC3,NEXN,ARPC2,SYK,INPPL1,ADAM9,PTK2,BAIAP2,CLDN5,NF1,MPZL1,SIRPA,PBX2,PECAM1
HALLMARK_ADIPOGENESIS	40/838	200/4383	0.401924	0.762006	0.433141	40	ADIPOR2,IFNGR1,MYLK,ATP1B3,BAZ2A,PGM1,APLP2,DHRS7,ALDH2,LPCAT3,BCL6,GBE1,SDHB,CAT,RNF11,POR,REEP5,RTN3,TANK,PPM1B,IDH1,TOB1,SDHC,ALDOA,PDCD4,UBC,ANGPT1,PPP1R15B,ACOX1,TKT,ABCA1,GHITM,PFKFB3,SLC19A1,TALDO1,DGAT1,ITSN1,GPX3,ORM1,CD302
HALLMARK_WNT_BETA_CATENIN_SIGNALING	9/838	42/4383	0.411484	0.762006	0.433141	9	JAG1,NUMB,ADAM17,MAML1,NCSTN,HEY1,FRAT1,CTNNB1,RBPJ
HALLMARK_APICAL_SURFACE	9/838	44/4383	0.470881	0.817176	0.4645	9	ADIPOR2,PLAUR,HSPB1,FLOT2,ADAM10,EPHB4,SULF2,NCOA6,LYN
HALLMARK_XENOBIOTIC_METABOLISM	39/838	200/4383	0.473962	0.817176	0.4645	39	ELOVL5,TNFRSF1A,HMOX1,DHRS7,LPIN2,PGRMC1,AQP9,TMEM176B,ABCC3,PTGES3,SLC6A12,ALDH2,MAN1A1,VNN1,IL1R1,KYNU,ARG1,CAT,POR,SLC6A6,NINJ1,CYP27A1,IDH1,GABARAPL1,TMBIM6,PGD,EPHX1,PTGES,ETS2,CDA,PINK1,ACOX1,FBP1,ATOH8,TPST1,PROS1,SERTAD1,PAPSS2,DDAH2
HALLMARK_GLYCOLYSIS	38/838	200/4383	0.547321	0.887636	0.504551	38	FKBP4,RRAGD,CD44,VCAN,PHKA2,HSPA5,PKM,PDK3,PLOD1,PYGL,PGK1,TPI1,VEGFA,HDLBP,QSOX1,TGFBI,P4HA1,LDHA,DSC2,TXN,IER3,IDH1,SLC16A3,SDHC,PAM,ALDOA,G6PD,SDC3,TGFA,TPST1,PGAM1,ISG20,GLRX,TALDO1,EXT1,COPB2,ERO1A,ANG
HALLMARK_FATTY_ACID_METABOLISM	30/838	158/4383	0.550334	0.887636	0.504551	30	ADIPOR2,ELOVL5,ACSL4,TP53INP2,HSP90AA1,PSME1,SMS,SERINC1,VNN1,HSDL2,HSPH1,G0S2,YWHAH,AOC3,HSD17B4,LDHA,GLUL,IDH1,GABARAPL1,SDHC,EPHX1,ALDOA,ACSL1,UBE2L6,CD1D,ACOX1,ALDH1A1,KMT5A,S100A10,HSD17B11
HALLMARK_EPITHELIAL_MESENCHYMAL_TRANSITION	36/838	200/4383	0.688269	1	0.568421	36	PLAUR,VIM,CD44,VCAN,MYLK,PVR,ITGB5,PLOD1,CD59,GADD45B,MYL9,TIMP1,TGFB1,VEGFA,SPARC,WIPF1,QSOX1,TNFAIP3,SPP1,TGFBI,COPA,LRP1,SAT1,NOTCH2,THBS1,FBN2,GLIPR1,RHOB,ITGA5,FSTL1,CXCL1,TPM4,CDH2,BASP1,JUN,ITGB3
HALLMARK_G2M_CHECKPOINT	36/838	200/4383	0.688269	1	0.568421	36	PAFAH1B1,ARID4A,CUL3,FOXN3,BCL3,PDS5B,YTHDC1,ATRX,MAP3K20,NUP50,PRMT5,HIF1A,TGFB1,KPNB1,CBX1,HSPA8,NUP98,CDKN1B,MAPK14,E2F3,LMNB1,DR1,STAG1,RAD23B,AMD1,NOTCH2,TLE3,LBR,HNRNPU,RAD21,KIF5B,KMT5A,TFDP1,TOP1,RBM14,MARCKS
HALLMARK_HEDGEHOG_SIGNALING	6/838	36/4383	0.711623	1	0.568421	6	MYH9,VEGFA,TLE3,ETS2,HEY1,NF1
HALLMARK_PEROXISOME	18/838	104/4383	0.720835	1	0.568421	18	ELOVL5,MVP,ACSL4,TSPO,SOD2,VPS4B,CAT,ATXN1,YWHAH,HSD17B4,IDH1,BCL10,ACSL1,ACOX1,PEX13,ALDH1A1,SIAH1,HSD17B11
HALLMARK_UV_RESPONSE_DN	25/838	144/4383	0.739271	1	0.568421	25	PRKAR2B,LTBP1,ATP2B4,ATP2B1,YTHDC1,ATRX,ZMIZ1,CDKN1B,MAPK14,NR3C1,PRDM2,PHF3,DUSP1,SPOP,ATXN1,BHLHE40,NOTCH2,DYRK1A,TGFBR2,NIPBL,PIK3CD,RXRA,SIPA1L1,GRK5,ITGB3
HALLMARK_NOTCH_SIGNALING	4/838	32/4383	0.886391	1	0.568421	4	JAG1,NOTCH2,ARRB1,PSENEN
HALLMARK_UNFOLDED_PROTEIN_RESPONSE	16/838	113/4383	0.934934	1	0.568421	16	NFYA,HSPA5,DNAJC3,VEGFA,CNOT6,ATF6,SEC11A,EIF4A2,ATP6V0D1,ATF3,YWHAZ,KIF5B,CEBPB,DCP2,ERN1,ERO1A
HALLMARK_DNA_REPAIR	22/838	150/4383	0.939162	1	0.568421	22	POLR2J,RRM2B,POLB,TSG101,POLD3,GMPR2,POLR2C,ELL,EIF1B,TAF12,DCTN4,AGO4,SDCBP,GTF2B,VPS37B,XPC,CDA,STX3,CANT1,HCLS1,PDE4B,SUPT4H1
HALLMARK_ESTROGEN_RESPONSE_EARLY	29/838	200/4383	0.96689	1	0.568421	29	FKBP4,ELOVL5,CD44,GAB2,RRP12,ITPK1,GLA,ELF1,MED13L,KDM4B,RARA,BHLHE40,KLF4,ABHD2,TOB1,MINDY1,ZNF185,PTGES,KLF10,TMEM164,TIPARP,RAB31,FOS,CANT1,AFF1,ABAT,SVIL,PAPSS2,MICB
HALLMARK_BILE_ACID_METABOLISM	14/838	112/4383	0.977629	1	0.568421	14	AQP9,CAT,ATXN1,HSD17B4,CYP27A1,IDH1,ACSL1,PEX13,ABCA1,ALDH1A1,SULT1B1,RXRA,HSD17B11,AMACR
HALLMARK_MYOGENESIS	27/838	200/4383	0.987329	1	0.568421	27	IFRD1,FHL1,GABARAPL2,DAPK2,MYLK,SIRT2,ITGB5,MAPRE3,GADD45B,MYH9,TGFB1,HBEGF,SPARC,MEF2D,CLU,CDKN1A,LSP1,BHLHE40,TPM3,RIT1,ACSL1,EIF4A2,GAA,FLII,FOXO4,SVIL,GPX3
HALLMARK_PANCREAS_BETA_CELLS	3/838	40/4383	0.989131	1	0.568421	3	VDR,LMO2,SEC11A
HALLMARK_ESTROGEN_RESPONSE_LATE	26/838	200/4383	0.992628	1	0.568421	26	FKBP4,PRKAR2B,ELOVL5,CD44,ATP2B4,ST6GALNAC2,SNX10,ITPK1,GLA,SGK1,ZFP36,KLF4,ABHD2,TOB1,PTGES,PDCD4,DUSP2,JAK1,S100A9,RAB31,FOS,ISG20,AFF1,SERPINA1,PAPSS2,MICB
HALLMARK_MYC_TARGETS_V2	3/838	58/4383	0.999545	1	0.568421	3	RRP12,DUSP2,SLC19A1
HALLMARK_MYC_TARGETS_V1	21/838	200/4383	0.999753	1	0.568421	21	IFRD1,FAM120A,HNRNPC,SRPK1,HSP90AB1,SF3A1,PGK1,KPNB1,EIF4G2,PTGES3,RAD23B,ETF1,COPS5,LDHA,HDGF,CCT5,HNRNPU,PCBP1,UBE2L3,TFDP1,PSMB3
HALLMARK_SPERMATOGENESIS	9/838	135/4383	0.999992	1	0.568421	9	IL12RB2,PGS1,TLE4,PRKAR2A,STAM2,BRAF,CLPB,IP6K1,TALDO1
HALLMARK_OXIDATIVE_PHOSPHORYLATION	15/838	200/4383	0.999999	1	0.568421	15	OAT,ATP6V1D,OGDH,ATP6V0E1,SDHB,ATP6V0B,NDUFB3,NQO2,NDUFA1,RHOT1,POR,ATP6V1E1,LDHA,IDH1,SDHC
HALLMARK_E2F_TARGETS	13/838	200/4383	1	1	0.568421	13	POLD3,PDS5B,ASF1B,CDKN1B,LMNB1,STAG1,CDKN1A,LBR,HMGB2,RAD21,PPM1D,MXD3,PRKDC
HALLMARK_KRAS_SIGNALING_DN	13/838	200/4383	1	1	0.568421	13	MAST3,MEFV,SGK1,SKIL,NR6A1,PTPRJ,NR4A2,MX1,BTG2,ASB7,SNN,GP1BA,SERPINB2

## Sheet: fisher_H_dn
ID	GeneRatio	BgRatio	pvalue	p.adjust	qvalue	Count	geneID
HALLMARK_MYC_TARGETS_V2	29/334	58/4383	4.64755e-18	2.2773e-16	2.00578e-16	29	NOP16,MRTO4,EXOSC5,PES1,NOP56,GRWD1,AIMP2,TMEM97,NOP2,BYSL,RRP9,SRM,UTP20,PPAN,MYBBP1A,WDR74,CDK4,TBRG4,IMP4,MYC,PPRC1,TFB2M,WDR43,NOLC1,PHB,PUS1,DCTPP1,NOC4L,PRMT3
HALLMARK_IL2_STAT5_SIGNALING	27/334	199/4383	0.002044	0.050078	0.0441074	27	RNH1,PRKCH,FLT3LG,ITGA6,IL2RB,SLC1A5,CD81,NOP2,CCND3,CISH,IKZF4,PTGER2,P2RX4,NT5E,MYC,IRF8,UCK2,TNFRSF21,MYO1E,DHRS3,EOMES,RHOH,HOPX,BCL2,PUS1,SOCS1,PTCH1
HALLMARK_UNFOLDED_PROTEIN_RESPONSE	16/334	113/4383	0.0109093	0.158739	0.139813	16	EXOSC5,NOP14,FUS,NOP56,RRP9,EXOSC9,DKC1,PARN,SRPRB,NHP2,NOLC1,DDIT4,YIF1A,IMP3,GEMIN4,SDAD1
HALLMARK_ALLOGRAFT_REJECTION	24/334	200/4383	0.0161978	0.158739	0.139813	24	HDAC9,TPD52,MTIF2,IL2RB,RPS19,CRTAM,IFNG,CCND3,MRPL3,ZAP70,FASLG,KLRD1,IRF8,GZMA,ABCE1,APBB1,CD7,PRF1,SOCS1,CXCR3,CD47,CD247,HLA-DOA,CCL4
HALLMARK_OXIDATIVE_PHOSPHORYLATION	24/334	200/4383	0.0161978	0.158739	0.139813	24	COX10,FH,NDUFB7,TIMM13,ETFB,NDUFS7,SLC25A12,ALDH6A1,MRPS12,TIMM10,LRPPRC,AFG3L2,TIMM8B,TOMM70,BDH2,FXN,PMPCA,ACAA2,NDUFV1,CYC1,IDH2,ACADSB,NDUFS3,BCKDHA
HALLMARK_E2F_TARGETS	23/334	200/4383	0.0288661	0.23574	0.207633	23	TFRC,MCM2,TIPIN,CBX5,CDC25B,NOP56,RNASEH2A,LIG1,POLD2,NUP107,MCM3,RAD1,HELLS,EXOSC8,DDX39A,PAICS,CDK4,TBRG4,MYC,TP53,NOLC1,TK1,DCTPP1
HALLMARK_DNA_REPAIR	18/334	150/4383	0.0346908	0.242836	0.213883	18	ERCC1,NME3,MPG,ERCC2,LIG1,GTF2H3,NT5C,ITPA,DDB2,TARBP2,TP53,AK3,ERCC3,FEN1,POLR1C,CSTF3,BOLA2,APRT
HALLMARK_MYC_TARGETS_V1	22/334	200/4383	0.0491805	0.256425	0.225852	22	NOP16,MCM2,RPS5,CAD,APEX1,NOP56,EIF3B,AIMP2,POLD2,C1QBP,RRP9,SRM,SNRPA1,CDK4,MYC,NHP2,TOMM70,ABCE1,NOLC1,PHB,CYC1,MRPS18B
HALLMARK_HEDGEHOG_SIGNALING	6/334	36/4383	0.0520988	0.256425	0.225852	6	CELSR1,NRCAM,CDK6,PTCH1,TLE1,ADGRG1
HALLMARK_CHOLESTEROL_HOMEOSTASIS	10/334	74/4383	0.0523316	0.256425	0.225852	10	TRIB3,SQLE,TMEM97,MVK,EBP,NSDHL,LSS,LPL,PCYT2,SREBF2
HALLMARK_WNT_BETA_CATENIN_SIGNALING	6/334	42/4383	0.0962201	0.428617	0.377514	6	DVL2,TCF7,MYC,LEF1,TP53,PTCH1
HALLMARK_ADIPOGENESIS	20/334	200/4383	0.124459	0.469114	0.413183	20	NDUFB7,SLC25A1,SLC1A5,ETFB,REEP6,EPHX2,ACADS,PEMT,CD36,ESYT1,PEX14,ACAA2,ELOVL6,LPL,CYC1,ABCB8,LTC4S,NDUFS3,BCKDHA,CHCHD10
HALLMARK_MTORC1_SIGNALING	20/334	200/4383	0.124459	0.469114	0.413183	20	GCLC,TFRC,MCM2,NUFIP1,TRIB3,SQLE,SLC1A5,TMEM97,RRP9,PNO1,DHCR24,SLC2A1,DDX39A,SDF2L1,TOMM40,ARPC5L,EBP,DDIT4,ELOVL6,DHFR
HALLMARK_PEROXISOME	11/334	104/4383	0.166058	0.581204	0.511909	11	ERCC1,DHCR24,ABCD3,EPHX2,PEX14,SLC35B2,CTBP1,DHRS3,ERCC3,IDH2,CLN8
HALLMARK_FATTY_ACID_METABOLISM	15/334	158/4383	0.220884	0.721555	0.635527	15	FH,GSTZ1,APEX1,REEP6,DHCR24,ACOT2,ACADS,CD36,BPHL,NSDHL,CCDC58,ACAA2,UROS,LTC4S,MIF
HALLMARK_APICAL_SURFACE	5/334	44/4383	0.241492	0.739569	0.651393	5	CROCC,IL2RB,CD160,TMEM8B,MAL
HALLMARK_ESTROGEN_RESPONSE_EARLY	17/334	200/4383	0.354113	0.963974	0.849042	17	MED24,RPS6KA2,CELSR1,CISH,SLC2A1,MYB,AKAP1,BCL11B,MYBBP1A,MYC,PRSS23,DHRS3,FCMR,RHOBTB3,FAM102A,CLIC3,BCL2
HALLMARK_XENOBIOTIC_METABOLISM	17/334	200/4383	0.354113	0.963974	0.849042	17	GCLC,SLC1A5,PTGDS,TMEM97,ID2,HACL1,MCCC2,PEMT,ACP2,CD36,BPHL,IRF8,EPHA2,HES6,TKFC,AKR1C3,LONP1
HALLMARK_ESTROGEN_RESPONSE_LATE	16/334	200/4383	0.457891	0.999811	0.880607	16	CACNA2D2,RPS6KA2,RNASEH2A,ETFB,LSR,CISH,ID2,MYB,XRCC3,ST14,PRSS23,GPER1,FAM102A,CLIC3,BCL2,IDH2
HALLMARK_GLYCOLYSIS	16/334	200/4383	0.457891	0.999811	0.880607	16	GCLC,MED24,LHPP,B3GAT1,SLC35A3,IDUA,NT5E,CHST12,NSDHL,AK3,B3GAT3,DDIT4,GMPPB,B3GALT6,MPI,MIF
HALLMARK_UV_RESPONSE_DN	11/334	144/4383	0.543432	0.999811	0.880607	11	DBP,PDGFRB,ARHGEF9,MYC,SLC7A1,ERBB2,PEX14,SMAD3,MGMT,NR1D2,TOGARAM1
HALLMARK_G2M_CHECKPOINT	14/334	200/4383	0.672532	0.999811	0.880607	14	MCM2,CDC25B,SQLE,TNPO2,MCM3,DDX39A,DKC1,CDK4,MYC,SLC7A1,CUL4A,UCK2,NOLC1,SMAD3
HALLMARK_P53_PATHWAY	14/334	200/4383	0.672532	0.999811	0.880607	14	SESN1,TRIB3,ZBTB16,CD81,CCND3,RPL36,DDB2,TP53,EPHA2,ST14,DDIT4,CTSF,EPS8L2,SOCS1
HALLMARK_PI3K_AKT_MTOR_SIGNALING	7/334	105/4383	0.699446	0.999811	0.880607	7	TRIB3,CAB39L,SLC2A1,FASLG,PAK4,CDK4,RPTOR
HALLMARK_REACTIVE_OXYGEN_SPECIES_PATHWAY	3/334	49/4383	0.733272	0.999811	0.880607	3	GCLC,ERCC2,TXNRD2
HALLMARK_BILE_ACID_METABOLISM	7/334	112/4383	0.761525	0.999811	0.880607	7	DHCR24,ABCD3,EPHX2,PEX16,HACL1,SLC35B2,IDH2
HALLMARK_ANGIOGENESIS	2/334	36/4383	0.772416	0.999811	0.880607	2	TNFRSF21,LPL
HALLMARK_TGF_BETA_SIGNALING	3/334	54/4383	0.791527	0.999811	0.880607	3	ID2,SMAD3,NOG
HALLMARK_HEME_METABOLISM	12/334	200/4383	0.847067	0.999811	0.880607	12	GCLC,TFRC,SLC11A2,CCND3,TFDP2,SLC2A1,ALDH6A1,SLC25A38,MFHAS1,RAD23A,UROS,GYPE
HALLMARK_INFLAMMATORY_RESPONSE	12/334	200/4383	0.847067	0.999811	0.880607	12	MARCO,P2RX7,IL2RB,SLC11A2,PTGER2,CCR7,P2RX4,MYC,SLC7A1,LY6E,NMUR1,CMKLR1
HALLMARK_INTERFERON_GAMMA_RESPONSE	12/334	200/4383	0.847067	0.999811	0.880607	12	SLAMF7,IL2RB,DHX58,IL18BP,ITGB7,IRF8,XCL1,GZMA,LY6E,CMKLR1,SOCS1,KLRK1
HALLMARK_KRAS_SIGNALING_UP	12/334	200/4383	0.847067	0.999811	0.880607	12	HDAC9,TRIB2,AMMECR1,CAB39L,ID2,SPRY2,IRF8,FBXO4,WNT7A,HKDC1,ACE,CMKLR1
HALLMARK_APOPTOSIS	9/334	161/4383	0.876401	0.999811	0.880607	9	CDC25B,PDGFRB,FASLG,LEF1,ERBB2,EBP,FEZ1,MGMT,PRF1
HALLMARK_ANDROGEN_RESPONSE	5/334	100/4383	0.888931	0.999811	0.880607	5	TPD52,CDK6,CCND3,DHCR24,ADAMTS1
HALLMARK_HYPOXIA	11/334	200/4383	0.907121	0.999811	0.880607	11	HS3ST1,TPD52,SLC25A1,ILVBL,SLC2A1,ACKR3,PLAC8,DDIT4,BCL2,B3GALT6,MIF
HALLMARK_KRAS_SIGNALING_DN	11/334	200/4383	0.907121	0.999811	0.880607	11	SPHK2,STAG3,SLC12A3,TCL1A,ZBTB16,IFNG,IDUA,PDE6B,SYNPO,CCDC106,MTHFR
HALLMARK_IL6_JAK_STAT3_SIGNALING	4/334	87/4383	0.907991	0.999811	0.880607	4	CD36,PDGFC,TNFRSF21,SOCS1
HALLMARK_MITOTIC_SPINDLE	10/334	199/4383	0.946471	0.999811	0.880607	10	TRIO,PLEKHG2,CEP250,BIN1,LRPPRC,PIF1,MYO1E,SYNPO,GEMIN4,TUBGCP5
HALLMARK_SPERMATOGENESIS	6/334	135/4383	0.95212	0.999811	0.880607	6	PHF7,PEBP1,RAD17,ACE,ALOX15,RPL39L
HALLMARK_PANCREAS_BETA_CELLS	1/334	40/4383	0.958635	0.999811	0.880607	1	SRPRB
HALLMARK_APICAL_JUNCTION	9/334	200/4383	0.974293	0.999811	0.880607	9	PKD1,ATP1A3,SORBS3,SYMPK,TMEM8B,LDLRAP1,NLGN2,AMIGO1,EVL
HALLMARK_EPITHELIAL_MESENCHYMAL_TRANSITION	9/334	200/4383	0.974293	0.999811	0.880607	9	IL32,PDGFRB,ID2,GPX7,NT5E,COL6A2,SNTB1,LAMA2,TPM2
HALLMARK_PROTEIN_SECRETION	3/334	96/4383	0.981122	0.999811	0.880607	3	TPD52,SCAMP3,BNIP3
HALLMARK_INTERFERON_ALPHA_RESPONSE	3/334	97/4383	0.982263	0.999811	0.880607	3	DHX58,LY6E,CD47
HALLMARK_COMPLEMENT	8/334	200/4383	0.988577	0.999811	0.880607	8	LIPA,KCNIP2,DYRK2,CD36,DOCK10,GZMA,APOBEC3G,CTSO
HALLMARK_UV_RESPONSE_UP	5/334	158/4383	0.994733	0.999811	0.880607	5	TFRC,CCND3,PPAT,SIGMAR1,FEN1
HALLMARK_MYOGENESIS	7/334	200/4383	0.995561	0.999811	0.880607	7	MYOM2,SORBS3,CD36,BIN1,COL6A2,LAMA2,TPM2
HALLMARK_TNFA_SIGNALING_VIA_NFKB	6/334	200/4383	0.998524	0.999811	0.880607	6	ID2,KLF9,MYC,ACKR3,SMAD3,CCL4
HALLMARK_COAGULATION	2/334	138/4383	0.999811	0.999811	0.880607	2	PRSS23,CTSO

## Sheet: fisher_CP_up
ID	GeneRatio	BgRatio	pvalue	p.adjust	qvalue	Count	geneID
REACTOME_NEUTROPHIL_DEGRANULATION	232/1792	479/13198	5.50291e-79	1.24036e-75	7.67512e-76	232	FGR,LAMP2,PGLYRP1,PLAUR,TYROBP,ALOX5,MVP,CAPN1,SERPINB1,ERP44,CD44,TNFRSF1B,GRN,ATP6V0A1,VCL,TIMP2,HEXB,CYBA,HEBP2,ATP11B,SLC2A3,CTSA,CNN2,PKM,RHOA,ROCK1,ATP11A,RAB27A,RAB7A,XRCC5,CEACAM1,PGM1,PSEN1,HSP90AA1,PTPRC,RAB10,CD59,FCN1,FTL,LYZ,CMTM6,SNAP23,CRISP3,HSP90AB1,RAB18,MAPK1,TOM1,PYGL,ATP6V1D,MMP9,DNAJC5,CTSZ,SIRPB1,VAPA,PGRMC1,GLA,DNAJC3,COTL1,CRISPLD2,CPPED1,ASAH1,SIGLEC5,RAB3D,IMPDH1,P2RX1,…
KEGG_FC_GAMMA_R_MEDIATED_PHAGOCYTOSIS	48/1792	96/13198	1.1072e-17	9.85152e-15	6.09595e-15	48	WAS,GAB2,PIK3CB,CDC42,FCGR2B,DNM2,PTPRC,CRKL,MAPK1,HCK,MAPK3,PIK3CG,ARPC3,PIKFYVE,VASP,RAC2,ARPC1B,RAF1,WASF3,DOCK2,RAC1,PIK3R5,VAV1,FCGR2A,PAK1,FCGR1A,ASAP2,ASAP1,WASF2,NCF1,ARPC5,ARPC2,PRKCD,SYK,PRKCB,CRK,INPP5D,MAP2K1,PIK3CD,MARCKSL1,LIMK2,PLCG2,DNM3,FCGR3A,ARPC4,ARPC1A,LYN,MARCKS
REACTOME_PLATELET_ACTIVATION_SIGNALING_AND_AGGREGATION	89/1792	261/13198	1.3112e-17	9.85152e-15	6.09595e-15	89	LAMP2,ITGA2B,VCL,LCP2,HSPA5,PIK3CB,DGKG,GNAI3,RHOA,CDC42,ACTN1,STXBP2,APBB1IP,GNB1,APLP2,GP6,BRPF3,MAPK1,TIMP1,MAPK3,TGFB1,PIK3CG,VWF,MAPK14,VEGFA,SPARC,GNAI2,GNB4,PLEK,QSOX1,STXBP3,RAP1A,GNA13,CLU,SRGN,F13A1,TUBA4A,GNG11,RAC2,ACTN4,CAP1,RAF1,CD63,RAC1,TLN1,ARRB1,THBS1,ARRB2,PIK3R5,VAV1,RHOB,LHFPL2,SERPING1,ALDOA,GNAQ,TAGLN2,FCER1G,PPBP,PF4,PRKCD,ANXA5,DAGLB,YWHAZ,SYK,CLEC1B,PRKCB,CRK,PTK2,GP9,GN…
WP_CHEMOKINE_SIGNALING_PATHWAY	66/1792	165/13198	2.3267e-17	1.3111e-14	8.11285e-15	66	FGR,WAS,PIK3CB,GNAI3,ROCK1,CDC42,GNB1,GSK3B,PXN,CRKL,MAPK1,SOS2,HCK,MAPK3,JAK3,PIK3CG,GNAI2,GNB4,RAP1A,FOXO3,PTK2B,CCR2,PREX1,GNG11,RAC2,ADCY4,RAF1,KRAS,ROCK2,DOCK2,RAC1,ARRB1,ARRB2,PIK3R5,VAV1,PARD3,PAK1,PLCB3,ELMO1,BRAF,NCF1,CXCL16,CXCL5,PPBP,PF4,CCR1,PRKCD,PRKCB,CRK,STAT3,MAP2K1,PTK2,STAT2,PIK3CD,GNB2,RELA,STAT5B,GNG5,GRB2,CXCR2,PLCB1,CCR4,GNG2,GRK6,GRK5,LYN
KEGG_CHEMOKINE_SIGNALING_PATHWAY	71/1792	189/13198	7.88245e-17	3.55341e-14	2.19879e-14	71	FGR,WAS,PIK3CB,GNAI3,RHOA,ROCK1,CDC42,PRKACA,GNB1,GSK3B,PXN,CRKL,MAPK1,SOS2,HCK,MAPK3,JAK3,PIK3CG,PF4V1,GNAI2,GNB4,RAP1A,FOXO3,PTK2B,CCR2,PREX1,GNG11,RAC2,ADCY4,RAF1,KRAS,ROCK2,DOCK2,RAC1,ARRB1,ARRB2,PIK3R5,VAV1,PARD3,PAK1,PLCB3,ELMO1,BRAF,NCF1,CXCL16,CXCR1,CXCL5,PPBP,PF4,CXCL1,CCR1,PRKCD,PRKCB,CRK,STAT3,MAP2K1,PTK2,STAT2,PIK3CD,GNB2,RELA,STAT5B,GNG5,GRB2,CXCR2,PLCB1,CCR4,GNG2,GRK6,GRK5,LYN
WP_VEGFAVEGFR2_SIGNALING_PATHWAY	124/1792	437/13198	1.16531e-16	4.37768e-14	2.70883e-14	124	CREBBP,PLAUR,SH2D2A,VCL,CTNNA1,FAM120A,MAP2K4,RHOA,ROCK1,CDC42,PTGS2,CAPZB,ITCH,HSP90AA1,GSK3B,ITGB5,DNAJA1,PXN,LRRFIP2,SRPK1,MAPK1,MYH9,JAG1,PGK1,MAPK3,USP10,RAB11A,NDRG1,GRB10,HSPB1,ENG,GAB1,EIF4G2,CBL,CAMKK2,GAPDH,MAPK14,SOD2,QKI,VEGFA,HBEGF,PPP2CA,RAP1A,NCF2,PRRC2C,ATF6,CREB1,FOXO3,PTK2B,ACOT9,NR4A1,RBM39,ATP6V1E1,RAF1,PRKAA1,KL,MICAL2,NUMB,ROCK2,LDHA,ANXA1,MDM2,RAC1,HLX,STAM,TXN,SDCBP,ADAM10…
WP_EGFEGFR_SIGNALING_PATHWAY	64/1792	163/13198	2.1193e-16	6.82414e-14	4.22266e-14	64	RALBP1,SH2D2A,GAB2,ROCK1,CDC42,ITCH,MAP3K1,CRKL,MAPK1,SOS2,GRB10,GAB1,CBL,MAPK14,STAM2,RAP1A,MEF2D,RPS6KA1,CREB1,PTK2B,NCOA3,FOSB,EPS15L1,PTPN12,JUND,RAF1,KRAS,RAC1,STAM,ABI1,USP8,IQGAP1,VAV1,RALB,RAB5A,IQSEC1,SH3KBP1,PAK1,ASAP1,BRAF,SYNJ1,AP2M1,JAK1,PRKCD,RICTOR,INPPL1,PRKCB,CRK,STAT3,INPP5D,MAP2K1,PTK2,REPS2,MAP3K2,FOS,STAT5B,JUN,GRB2,LIMK2,FOXO4,SP1,PLSCR1,MAP3K3,ATXN2
PID_PDGFRB_PATHWAY	55/1792	129/13198	3.91524e-16	1.10312e-13	6.8259e-14	55	FGR,PIK3CB,EIF2AK2,MAP2K4,RHOA,DNM2,CTTN,MAPK1,HCK,MAPK3,PIK3CG,GRB10,GAB1,CBL,ARPC3,PPP2CA,ACTR3,RAP1A,LRP1,YWHAH,ACTN4,ARPC1B,JUND,RAF1,KRAS,RAC1,ABI1,ACTR2,IQGAP1,PIK3R5,RAB5A,PTPRJ,PAK1,SLA,BRAF,WASF2,ARPC5,ARPC2,PRKCD,YWHAZ,YWHAB,CRK,STAT3,MAP2K1,FOS,PIK3CD,STAT5B,BAIAP2,JUN,GRB2,ARAP1,SIPA1,ARPC4,LYN,ITGB3
REACTOME_DISEASES_OF_SIGNAL_TRANSDUCTION_BY_GROWTH_FACTOR_RECEPTORS_AND_SECOND_MESSENGERS	108/1792	386/13198	3.33115e-14	8.34269e-12	5.16231e-12	108	POLR2J,CREBBP,ITGA2B,KDM7A,GAB2,VCL,PIK3CB,PPP2R5A,PPP2R5B,SEL1L,MARK3,APBB1IP,PSEN1,HSP90AA1,GSK3B,FKBP1A,PSME1,MAPK1,EP300,JAG1,MIB1,TBL1X,MAPK3,POLR2C,TGFB1,TGFBR1,SHOC2,GAB1,CBL,VWF,BIN2,DUSP16,CDKN1B,QKI,HBEGF,PPP2CA,CSNK1A1,CD86,KAT2B,FXR1,WDR48,STRN,RAP1A,CREB1,FOXO3,NR4A1,CDKN1A,LRRFIP1,EREG,PTPN12,RAC2,PSME3,RAF1,AP3B1,KL,KRAS,APC,OS9,MDM2,RAC1,TLN1,ARRB1,ADAM10,ETV6,DUSP6,IQGAP1,NCOR1,A…
PID_VEGFR1_2_PATHWAY	35/1792	69/13198	1.66661e-13	3.75653e-11	2.32448e-11	35	SH2D2A,VCL,CTNNA1,RHOA,ROCK1,CDC42,PRKACA,DNM2,HSP90AA1,PXN,HSP90AB1,MAPK1,MAPK3,GRB10,GAB1,CBL,CAMKK2,MAPK14,VEGFA,PTK2B,RAF1,PRKAA1,IQGAP1,ARF1,PTPRJ,BRAF,MAPKAPK2,PRKCD,PRKCB,CTNNB1,MAP2K1,PTK2,GRB2,PAK2,ITGB3
KEGG_ENDOCYTOSIS	62/1792	181/13198	9.1991e-13	1.88498e-10	1.16639e-10	62	EHD3,CDC42,TSG101,ITCH,DNM2,CHMP5,SH3GLB1,PARD6A,RAB11A,RAB5C,HSPA8,EHD1,CBL,RAB5B,ACAP2,PIKFYVE,STAM2,CHMP3,VPS4B,ARAP3,IQSEC2,PSD4,CHMP2A,RAB11FIP4,AGAP2,MDM2,STAM,ARRB1,USP8,GIT2,VPS37B,CLTC,ARRB2,RAB5A,IQSEC1,SH3KBP1,PARD3,ASAP2,ASAP1,VPS37A,RAB11FIP1,AP2M1,CXCR1,VPS37C,RAB31,HSPA6,RUFY1,CXCR2,RNF41,CSF1R,ARAP1,DNM3,GRK6,GRK5,HSPA1B,HSPA1A,HLA-C,HLA-E,HLA-A,HLA-B,ARFGAP3,CHMP1B
REACTOME_SIGNALING_BY_INTERLEUKINS	118/1792	462/13198	2.09272e-12	3.93083e-10	2.43233e-10	118	ALOX5,VIM,TNFRSF1B,GAB2,PIK3CB,TAB2,CNN2,MAP2K4,TNFRSF1A,CDC42,PRKACA,PTGS2,STXBP2,HSP90AA1,IL12RB2,IRAK3,PSME1,CRKL,OSM,MAPK1,HMOX1,CSF2RB,SOS2,HIF1A,MMP9,HCK,TIMP1,MAPK3,RIPK2,VRK3,TGFB1,JAK3,DUSP3,HSPA8,CBL,MAPK14,SOD2,VEGFA,LMNB1,PPP2CA,BCL6,CD86,MAPKAPK3,IL1R2,IL1R1,IL18R1,IL18RAP,CAPZA1,RPS6KA1,CREB1,FOXO3,PTK2B,CCR2,F13A1,CDKN1A,IL1B,PTPN12,PSME3,ANXA1,LCP1,IL1RN,CASP1,DUSP6,PELI2,VAV1,MCL…
PID_ERBB1_DOWNSTREAM_PATHWAY	43/1792	105/13198	3.38792e-12	5.87413e-10	3.63481e-10	43	SH2D2A,PIK3CB,MAP2K4,CDC42,MAP3K1,MAPK1,MAPK3,GAB1,ARPC3,PPP2CA,ACTR3,CREB1,DUSP1,ZFP36,YWHAH,ARPC1B,RAF1,KRAS,RAC1,ABI1,ACTR2,DUSP6,IQGAP1,RAB5A,BRAF,WASF2,ARPC5,ARPC2,PRKCD,RICTOR,YWHAZ,YWHAB,ARF4,STAT3,MAP2K1,MAP3K2,FOS,PIK3CD,BAIAP2,JUN,GRB2,PPP2R2A,ARPC4
PID_IL8_CXCR2_PATHWAY	22/1792	34/13198	7.8864e-12	1.26971e-09	7.85675e-10	22	FGR,RAB7A,GNB1,HCK,RAB11A,PIK3CG,CBL,PPP2CA,GNAI2,VASP,RAC2,DOCK2,ARRB1,ARRB2,RAB5A,PLCB3,ELMO1,PRKCB,CXCR2,PLCB1,GNG2,LYN
REACTOME_SIGNALING_BY_RHO_GTPASES	114/1792	454/13198	1.62242e-11	2.43796e-09	1.50857e-09	114	PAFAH1B1,BTK,WAS,RALBP1,CTNNA1,ARHGAP6,CYBA,PPP1R12A,PKN2,MYLK,PPP2R5A,RHOA,ROCK1,PPP2R5B,CDC42,RHOBTB1,NDE1,PPP1R12B,PIK3C3,CTTN,MYL6,MAPK1,MYH9,NCF4,SOS2,TUBB1,MYL9,MAPRE1,MAPK3,ARHGAP21,NUP98,ARPC3,CDKN1B,ARHGDIB,MAPK14,PPP2CA,ECT2,ACTR3,WIPF1,ARHGEF2,NCF2,MYL12B,GNA13,ARAP3,ARHGAP9,TUBA1B,B9D2,PREX1,RHOT1,TUBA4A,YWHAH,RAC2,ARHGEF6,STARD8,ARPC1B,CLIP1,DIAPH1,ARHGEF11,WASF3,ROCK2,DYNC1LI2,RAC1,…
REACTOME_RHO_GTPASES_ACTIVATE_WASPS_AND_WAVES	22/1792	36/13198	4.15032e-11	5.84676e-09	3.61787e-09	22	BTK,WAS,CDC42,MAPK1,MAPK3,ARPC3,ACTR3,WIPF1,ARPC1B,WASF3,RAC1,ABI1,ACTR2,WASF2,ARPC5,ARPC2,PTK2,WIPF2,BAIAP2,GRB2,ARPC4,ARPC1A
WP_CORTICOTROPINRELEASING_HORMONE_SIGNALING_PATHWAY	38/1792	93/13198	6.62526e-11	8.78431e-09	5.43558e-09	38	RHOA,FOSL2,GNB1,HSP90AA1,GSK3B,MAPK1,MAPK3,TGFB1,MAPK14,GNAI2,ECE1,CREB1,NR4A1,FOSB,GNAZ,JUND,RAF1,TLR4,ARRB1,NCOA2,ARRB2,NR4A2,GNAQ,BRAF,PRKCD,PRKCB,CTNNB1,MAP2K1,PTK2,FOS,JUNB,GNB2,RELA,ERN1,SP1,MAP3K5,PLCG2,GRK6
WP_MICROGLIA_PATHOGEN_PHAGOCYTOSIS_PATHWAY	23/1792	40/13198	8.6046e-11	1.07749e-08	6.66731e-09	23	TYROBP,PIK3CB,CYBA,PIK3C3,NCF4,HCK,PIK3CG,NCF2,TREM1,RAC2,ARPC1B,RAC1,VAV1,FCGR1A,NCF1,FCER1G,ITGB2,SYK,SIGLEC7,ITGAM,PIK3CD,PLCG2,LYN
WP_B_CELL_RECEPTOR_SIGNALING_PATHWAY	39/1792	98/13198	9.6707e-11	1.14725e-08	7.09899e-09	39	BTK,GAB2,CDC42,PTPRC,GSK3B,LAT2,CRKL,MAPK1,PIK3CG,GAB1,CBL,MAPK14,E2F3,BCL6,MEF2D,RPS6KA1,CREB1,MAX,RAC2,RAF1,RAC1,VAV1,BCL10,PIK3AP1,BRAF,REL,PRKCD,SYK,PRKCB,CRK,INPP5D,MAP2K1,RELA,JUN,GRB2,HCLS1,PLCG2,LYN,GTF2I
KEGG_LEUKOCYTE_TRANSENDOTHELIAL_MIGRATION	43/1792	116/13198	1.62322e-10	1.82937e-08	1.13198e-08	43	VCL,CTNNA1,PIK3CB,CYBA,GNAI3,RHOA,ROCK1,CDC42,ACTN1,PXN,NCF4,MMP9,MYL9,MYL12A,PIK3CG,MAPK14,GNAI2,RAP1A,NCF2,MYL12B,PTK2B,VASP,RAC2,ACTN4,ROCK2,RAC1,PIK3R5,VAV1,MSN,ESAM,NCF1,F11R,ITGB2,PRKCB,CTNNB1,PTK2,ITGAM,PIK3CD,CLDN5,PLCG2,SIPA1,PECAM1,RASSF5
REACTOME_INTERFERON_SIGNALING	62/1792	203/13198	2.25809e-10	2.42369e-08	1.49974e-08	62	CD44,IFNGR1,PIAS1,EIF2AK2,SP100,EIF4G3,NUP50,MAPK3,DDX58,KPNB1,EIF4G2,NUP98,TRIM38,KPNA1,GBP1,IFIT3,IFIT2,TRIM25,IRF1,IFI6,NUP214,BST2,TRIM21,OASL,RNASEL,EIF4E2,PPM1B,NUP58,IFITM3,IFNAR1,FCGR1A,UBC,IFIT5,UBE2L6,EIF4A2,MX1,IFNAR2,IFNGR2,ADAR,JAK1,GBP2,GBP4,EIF4E3,PRKCD,ARIH1,B2M,IRF2,PTAFR,STAT2,TRIM8,ISG20,MX2,SOCS3,IFITM2,IFITM1,KPNA4,PSMB8,HLA-C,HLA-E,HLA-A,IFI30,HLA-B
KEGG_RENAL_CELL_CARCINOMA	31/1792	70/13198	3.36935e-10	3.45205e-08	2.13607e-08	31	CREBBP,PIK3CB,CDC42,CRKL,MAPK1,EP300,SOS2,HIF1A,MAPK3,TGFB1,PIK3CG,GAB1,VEGFA,EPAS1,RAP1A,RAF1,KRAS,EGLN1,RAC1,PIK3R5,ARNT,PAK1,BRAF,TGFA,CRK,MAP2K1,PIK3CD,JUN,GRB2,PAK2,EGLN2
KEGG_B_CELL_RECEPTOR_SIGNALING_PATHWAY	32/1792	75/13198	5.64126e-10	5.52844e-08	3.4209e-08	32	BTK,PIK3CB,FCGR2B,GSK3B,MAPK1,SOS2,MAPK3,NFAT5,PIK3CG,RAC2,RAF1,KRAS,RAC1,PPP3CA,PIK3R5,VAV1,BCL10,PIK3AP1,SYK,PRKCB,INPP5D,MAP2K1,FOS,PIK3CD,RELA,JUN,GRB2,IFITM1,CHP1,PLCG2,LILRB3,LYN
REACTOME_RHO_GTPASE_EFFECTORS	85/1792	324/13198	6.72348e-10	6.31447e-08	3.90729e-08	85	PAFAH1B1,BTK,WAS,CTNNA1,CYBA,PPP1R12A,PKN2,MYLK,PPP2R5A,RHOA,ROCK1,PPP2R5B,CDC42,NDE1,PPP1R12B,PIK3C3,CTTN,MYL6,MAPK1,MYH9,NCF4,TUBB1,MYL9,MAPRE1,MAPK3,NUP98,ARPC3,CDKN1B,MAPK14,PPP2CA,ACTR3,WIPF1,NCF2,MYL12B,TUBA1B,B9D2,TUBA4A,YWHAH,RAC2,ARPC1B,CLIP1,DIAPH1,WASF3,ROCK2,DYNC1LI2,RAC1,ABI1,ACTR2,NCOA2,IQGAP1,S100A8,RHOB,DYNC1LI1,IQGAP2,PAK1,AHCTF1,WASF2,NCF1,TAOK1,ARPC5,S100A9,ARPC2,PRKCD,YWHAZ,PR…
REACTOME_TOLL_LIKE_RECEPTOR_CASCADES	50/1792	153/13198	9.56679e-10	8.62542e-08	5.33726e-08	50	BTK,TAB2,CASP8,MAP2K4,UBE2D1,PIK3C3,DNM2,IRAK3,MAP3K1,MAPK1,TLR8,MAPK3,RIPK2,VRK3,DUSP3,UBE2D3,MAPK14,PPP2CA,MAPKAPK3,RPS6KA1,CREB1,TANK,TLR4,CNPY3,DUSP6,PELI2,S100A8,UBC,LY96,ITGB2,MAPKAPK2,CTSS,S100A9,S100A12,CTSB,NOD2,MAP2K1,ITGAM,FOS,CD14,RELA,TLR1,PELI3,JUN,TBK1,TLR5,PELI1,PLCG2,DNM3,TLR9
PID_HIF1_TFPATHWAY	29/1792	66/13198	1.56677e-09	1.32187e-07	8.17953e-08	29	CREBBP,PKM,PGM1,NCOA1,HMOX1,EP300,HIF1A,PGK1,NDRG1,ENG,VEGFA,CREB1,COPS5,BHLHE40,LDHA,EGLN1,NCOA2,FURIN,SMAD4,MCL1,ARNT,ADM,ALDOA,HK1,ITGB2,FOS,PFKFB3,JUN,SP1
WP_PATHOGENIC_ESCHERICHIA_COLI_INFECTION	26/1792	55/13198	1.58343e-09	1.32187e-07	8.17953e-08	26	WAS,RHOA,ROCK1,CDC42,CTTN,TUBB1,ARPC3,ARHGEF2,TUBA1B,TUBA4A,ARPC1B,ROCK2,TLR4,LY96,ARPC5,ARPC2,YWHAZ,TUBA1A,CTNNB1,CD14,HCLS1,TUBA8,TLR5,TUBB4B,ARPC4,ARPC1A
WP_TGFBETA_SIGNALING_PATHWAY	45/1792	133/13198	1.89663e-09	1.43918e-07	8.90537e-08	45	CREBBP,PIAS1,ZFYVE16,MAP2K4,KLF6,RHOA,ROCK1,CDC42,ITCH,MAPK1,EP300,PPM1A,PARD6A,TGFB1,TGFBR1,NEDD9,MAPK14,PRKAR2A,COPS5,CDKN1A,FOSB,NUP214,JUND,RAF1,RAC1,SKIL,THBS1,SMAD4,KLF10,RNF111,SKI,ATF3,TGFBR2,MAP2K1,PTK2,ZEB2,FOS,JUNB,JUN,GRB2,PAK2,LIMK2,SP1,TFDP1,ITGB3
WP_MET_IN_TYPE_1_PAPILLARY_RENAL_CELL_CARCINOMA	27/1792	59/13198	1.90019e-09	1.43918e-07	8.90537e-08	27	PIK3CB,TFE3,CDC42,CRKL,MAPK1,SOS2,MAPK3,JAK3,GAB1,CBL,STRN,RAP1A,CDKN1A,RAF1,KRAS,RAC1,PAK1,BRAF,CRK,STAT3,MAP2K1,PTK2,PIK3CD,JUN,GRB2,PAK2,INSL3
KEGG_REGULATION_OF_ACTIN_CYTOSKELETON	62/1792	213/13198	1.9155e-09	1.43918e-07	8.90537e-08	62	ITGA2B,WAS,VCL,PIK3CB,PPP1R12A,MYLK,RHOA,ROCK1,CDC42,ACTN1,ITGB5,PXN,CRKL,MAPK1,MYH9,SOS2,MYL9,MYL12A,MAPK3,PIK3CG,ARPC3,PIKFYVE,MYL12B,GNA13,RAC2,ARHGEF6,FGF13,ACTN4,ARPC1B,DIAPH1,RAF1,KRAS,ROCK2,APC,RAC1,IQGAP1,SSH2,PIK3R5,VAV1,IQGAP2,MSN,PAK1,BRAF,WASF2,ITGB2,ITGA5,ARPC5,ARPC2,CRK,MAP2K1,PTK2,ITGAM,CD14,PIK3CD,BAIAP2,PAK2,LIMK2,TMSB4X,PPP1CB,ARPC4,ARPC1A,ITGB3
WP_TYROBP_CAUSAL_NETWORK	28/1792	63/13198	2.17902e-09	1.58436e-07	9.80374e-08	28	TYROBP,TNFRSF1B,APBB1IP,ELF4,TGFBR1,BIN2,SH2B3,PLEK,NCF2,RPS6KA1,SPP1,FKBP15,NPC2,HLX,IGSF6,LHFPL2,PPP1R18,SAMSN1,SLC7A7,ITGB2,CXCL16,RBM47,RNASE6,ITGAM,KCNE3,GAPT,HCLS1,DPYD
WP_MAPK_SIGNALING_PATHWAY	69/1792	249/13198	2.38506e-09	1.67998e-07	1.03954e-07	69	TAB2,MAP2K4,TNFRSF1A,CDC42,MAP4K4,PRKACA,MAP3K20,MAP3K1,MKNK2,CRKL,MAPK1,SOS2,PPM1A,STK4,MAPK3,TGFB1,HSPB1,TGFBR1,DUSP3,LAMTOR3,RAPGEF2,HSPA8,DUSP16,MAPK14,MAPKAPK3,IL1R2,IL1R1,RAP1A,DUSP1,NR4A1,IL1B,MAX,RAC2,FGF13,JUND,RAF1,KRAS,TAOK3,RAC1,ARRB1,PPM1B,PPP3CA,DUSP6,ARRB2,DUSP10,PAK1,BRAF,DUSP2,TAOK1,MAPKAPK2,TGFBR2,PRKCD,CRK,MAP2K1,MAP3K2,FOS,CD14,RASGRP4,RELA,HSPA6,DDIT3,JUN,GRB2,PAK2,LRRK2,NF1,…
KEGG_PATHOGENIC_ESCHERICHIA_COLI_INFECTION	26/1792	56/13198	2.57595e-09	1.75945e-07	1.08872e-07	26	WAS,RHOA,ROCK1,CDC42,CTTN,TUBB1,ARPC3,ARHGEF2,TUBA1B,TUBA4A,ARPC1B,ROCK2,TLR4,LY96,ARPC5,ARPC2,YWHAZ,TUBA1A,CTNNB1,CD14,HCLS1,TUBA8,TLR5,TUBB4B,ARPC4,ARPC1A
WP_IL3_SIGNALING_PATHWAY	24/1792	49/13198	2.73312e-09	1.8119e-07	1.12117e-07	24	GAB2,PRKACA,CRKL,MAPK1,CSF2RB,HCK,MAPK3,TGFB1,CBL,CD86,RAF1,VAV1,JAK1,SYK,YWHAB,STAT3,INPP5D,MAP2K1,FOS,PIK3CD,STAT5B,JUN,GRB2,LYN
PID_FCER1_PATHWAY	27/1792	60/13198	3.01058e-09	1.93882e-07	1.19971e-07	27	BTK,GAB2,LCP2,MAP2K4,FCGR2B,LAT2,PXN,MAP3K1,MAPK1,MAPK3,CBL,WIPF1,DUSP1,RAF1,VAV1,FCER1G,SYK,PRKCB,MAP2K1,PTK2,FOS,RELA,JUN,GRB2,HCLS1,PAK2,LYN
KEGG_NEUROTROPHIN_SIGNALING_PATHWAY	43/1792	126/13198	3.20715e-09	1.96712e-07	1.21722e-07	43	PIK3CB,RHOA,CDC42,PSEN1,GSK3B,IRAK3,MAP3K1,CRKL,MAPK1,SOS2,MAPK3,RIPK2,PIK3CG,GAB1,SH2B3,ARHGDIB,MAPK14,RAP1A,RPS6KA1,FOXO3,YWHAH,RAF1,KRAS,KIDINS220,RAC1,PIK3R5,CALM2,BRAF,CALM3,SH2B2,MAPKAPK2,PRKCD,YWHAZ,YWHAB,CRK,MAP2K1,PIK3CD,RELA,JUN,GRB2,MAP3K5,PLCG2,MAP3K3
PID_CXCR4_PATHWAY	37/1792	100/13198	3.22908e-09	1.96712e-07	1.21722e-07	37	FGR,PIK3CB,GNAI3,RHOA,CDC42,GNB1,ITCH,PTPRC,PXN,MMP9,HCK,PIK3CG,GNAI2,VPS4B,GNA13,PTK2B,GNAZ,RAC1,ARRB2,PIK3R5,VAV1,RHOB,RALB,PAK1,PLCB3,ITGA5,RICTOR,CRK,STAT3,PTK2,STAT2,PIK3CD,STAT5B,PLCB1,GNG2,GRK6,LYN
BIOCARTA_PYK2_PATHWAY	17/1792	27/13198	3.68164e-09	2.1838e-07	1.3513e-07	17	MAP2K4,MAP3K1,CRKL,MAPK1,MAPK3,MAPK14,PTK2B,RAF1,RAC1,CALM2,PAK1,GNAQ,CALM3,PRKCB,MAP2K1,JUN,GRB2
KEGG_MAPK_SIGNALING_PATHWAY	72/1792	267/13198	3.8807e-09	2.24285e-07	1.38784e-07	72	TAB2,MAP2K4,TNFRSF1A,CDC42,MAP4K4,PRKACA,MAP3K20,MAP3K1,GADD45B,MKNK2,CRKL,MAPK1,SOS2,PPM1A,STK4,MAPK3,TGFB1,HSPB1,TGFBR1,DUSP3,LAMTOR3,RAPGEF2,HSPA8,DUSP16,MAPK14,MAPKAPK3,IL1R2,IL1R1,RAP1A,RPS6KA1,DUSP1,NR4A1,IL1B,MAX,RAC2,FGF13,JUND,RAF1,KRAS,TAOK3,RAC1,ARRB1,PPM1B,PPP3CA,DUSP6,ARRB2,DUSP10,PAK1,BRAF,DUSP2,TAOK1,MAPKAPK2,TGFBR2,PRKCB,CRK,MAP2K1,MAP3K2,FOS,CD14,RASGRP4,RELA,HSPA6,DDIT3,JUN,GRB2…
WP_GASTRIN_SIGNALING_PATHWAY	40/1792	114/13198	4.53449e-09	2.55518e-07	1.5811e-07	40	CD44,RHOA,ROCK1,CDC42,PRKACA,PTGS2,GSK3B,PXN,MAPK1,JAG1,MAPK3,LAMTOR3,CDKN1B,MAPK14,VEGFA,MEF2D,CREB1,FOXO3,CDKN1A,RAF1,KRAS,RAC1,KLF4,ARRB1,ARRB2,RHOB,PAK1,GNAQ,PRKCD,CRK,CTNNB1,STAT3,MAP2K1,PTK2,FOS,RELA,JUN,GRB2,SP1,SERPINB2
REACTOME_RESPONSE_TO_ELEVATED_PLATELET_CYTOSOLIC_CA2_	44/1792	132/13198	4.84094e-09	2.66134e-07	1.64679e-07	44	LAMP2,ITGA2B,VCL,HSPA5,ACTN1,STXBP2,APLP2,BRPF3,TIMP1,TGFB1,VWF,VEGFA,SPARC,PLEK,QSOX1,STXBP3,CLU,SRGN,F13A1,TUBA4A,ACTN4,CAP1,CD63,TLN1,THBS1,LHFPL2,SERPING1,ALDOA,TAGLN2,PPBP,PF4,ANXA5,PRKCB,SELP,PROS1,SERPINA1,PSAP,F5,LY6G6F,TMSB4X,ORM2,ORM1,ITGB3,PECAM1
PID_RAC1_PATHWAY	25/1792	54/13198	5.61018e-09	3.0108e-07	1.86303e-07	25	CTNNA1,CYBA,MAP2K4,MAP3K1,ARPC3,MAPK14,ACTR3,NCF2,ARPC1B,RAC1,ABI1,ACTR2,IQGAP1,PAK1,WASF2,NCF1,ARPC5,ARPC2,CRK,CTNNB1,STAT3,BAIAP2,JUN,PAK2,ARPC4
PID_IL6_7_PATHWAY	23/1792	47/13198	5.98833e-09	3.139e-07	1.94236e-07	23	GAB2,PIAS1,MAP2K4,HCK,TIMP1,GAB1,MAPK14,IRF1,PTPRE,RAC1,VAV1,MCL1,IL6R,JAK1,PRKCD,STAT3,FOS,JUNB,CEBPB,JUN,GRB2,SOCS3,CEBPD
PID_CDC42_PATHWAY	29/1792	70/13198	8.1724e-09	4.1865e-07	2.59053e-07	29	CTNNA1,MAP2K4,CDC42,GSK3B,MAP3K1,MAPK1,MAPK3,PARD6A,CBL,ARPC3,MAPK14,ACTR3,ARHGEF6,ARPC1B,RAF1,APC,RAC1,ACTR2,IQGAP1,PAK1,BRAF,ARPC5,ARPC2,CTNNB1,BAIAP2,JUN,PAK2,LIMK2,ARPC4
PID_PI3KCI_PATHWAY	23/1792	48/13198	1.0026e-08	4.97915e-07	3.08101e-07	23	FGR,CYTH3,BTK,PIK3CB,RHOA,HSP90AA1,HCK,CYTH2,PIK3CG,RAP1A,SGK1,FOXO3,ARAP3,KRAS,RAC1,PIK3R5,ARF1,SYK,INPPL1,PLEKHA2,PIK3CD,PLCG2,LYN
PID_FAK_PATHWAY	26/1792	59/13198	1.01615e-08	4.97915e-07	3.08101e-07	26	VCL,MAP2K4,RHOA,ACTN1,ITGB5,PXN,MAPK1,BMX,RAP1A,RAF1,ARHGEF11,ROCK2,RAC1,TLN1,GIT2,ARHGAP26,PAK1,ASAP1,ELMO1,BRAF,ITGA5,CRK,MAP2K1,PTK2,JUN,GRB2
PID_MET_PATHWAY	31/1792	79/13198	1.19317e-08	5.72214e-07	3.54076e-07	31	GAB2,CTNNA1,MAP2K4,RHOA,CDC42,PXN,MAP3K1,CRKL,MAPK1,MAPK3,PARD6A,KPNB1,GAB1,CBL,RAP1A,RAF1,NUMB,APC,RAC1,RAB5A,SH3KBP1,PTPRJ,PAK1,INPPL1,CRK,CTNNB1,MAP2K1,PTK2,JUN,GRB2,PAK2
REACTOME_CLATHRIN_MEDIATED_ENDOCYTOSIS	46/1792	145/13198	1.27536e-08	5.98888e-07	3.70582e-07	46	VAMP3,PICALM,DNM2,CTTN,PACSIN2,RAB5C,HSPA8,CBL,ARPC3,RAB5B,HBEGF,ACTR3,STAM2,COPS5,EREG,EPS15L1,HIP1,STAM,TOR1B,TOR1A,ARRB1,ACTR2,STON2,CLTC,ARRB2,RAB5A,SH3KBP1,UBC,TGOLN2,FCHO2,SYNJ1,AP2M1,ARPC5,TGFA,ARPC2,GAPVD1,REPS2,GRB2,FNBP1,UBQLN2,IGF2R,DNM3,ITSN2,ITSN1,ARPC4,ARPC1A
REACTOME_SIGNALING_BY_VEGF	37/1792	106/13198	2.00205e-08	9.20944e-07	5.69864e-07	37	SH2D2A,CTNNA1,PIK3CB,CYBA,RHOA,ROCK1,CDC42,PRKACA,HSP90AA1,PXN,NCF4,HSPB1,MAPK14,VEGFA,MAPKAPK3,NCF2,PTK2B,WASF3,KRAS,ROCK2,RAC1,ABI1,VAV1,PAK1,ELMO1,WASF2,NCF1,MAPKAPK2,PRKCD,RICTOR,PRKCB,CRK,CTNNB1,PTK2,BAIAP2,PAK2,ITGB3
BIOCARTA_FCER1_PATHWAY	20/1792	39/13198	2.12495e-08	9.57926e-07	5.92748e-07	20	BTK,MAP2K4,MAP3K1,MAPK1,MAPK3,PIK3CG,RAF1,PPP3CA,VAV1,CALM2,FCER1G,CALM3,SYK,PRKCB,MAP2K1,FOS,JUN,GRB2,PAK2,LYN
REACTOME_HSP90_CHAPERONE_CYCLE_FOR_STEROID_HORMONE_RECEPTORS_SHR_	25/1792	57/13198	2.19243e-08	9.6897e-07	5.99582e-07	25	FKBP4,DNAJA2,CAPZB,HSP90AA1,DNAJA1,HSP90AB1,TUBB1,HSPA8,PTGES3,NR3C1,CAPZA1,TUBA1B,TUBA4A,DNAJB1,DCTN4,DYNC1LI2,ACTR1A,DYNC1LI1,TUBA1A,STIP1,TUBA8,TUBB4B,CAPZA2,HSPA1B,HSPA1A
REACTOME_SIGNALING_BY_NTRKS	43/1792	134/13198	2.59117e-08	1.12317e-06	6.94999e-07	43	PIK3CB,RHOA,DNM2,CRKL,MAPK1,EP300,MAPK3,VRK3,DUSP3,GAB1,CHD4,MAPK14,PPP2CA,MAPKAPK3,RAP1A,MEF2D,RPS6KA1,CREB1,SGK1,FOSB,JUND,KRAS,KIDINS220,RAC1,NAB1,DUSP6,PCSK6,FURIN,CLTC,RIT1,RALB,BRAF,AP2M1,MAPKAPK2,YWHAB,CRK,STAT3,MAP2K1,FOS,JUNB,TRIB1,GRB2,DNM3
WP_MAPK_CASCADE	18/1792	33/13198	3.07888e-08	1.30939e-06	8.10231e-07	18	MAP2K4,MAP3K1,MAPK1,SOS2,MAPK3,LAMTOR3,MAPK14,RAF1,KRAS,PLCB3,BRAF,MAP2K1,MAP3K2,JUN,GRB2,MBP,MAP3K3,SIPA1
REACTOME_ONCOGENIC_MAPK_SIGNALING	31/1792	82/13198	3.35437e-08	1.40014e-06	8.66383e-07	31	ITGA2B,KDM7A,VCL,MARK3,APBB1IP,MAPK1,MAPK3,SHOC2,VWF,DUSP16,QKI,FXR1,RAP1A,RAF1,AP3B1,KRAS,TLN1,ARRB1,DUSP6,IQGAP1,ARRB2,DUSP10,BRAF,LMNA,YWHAB,MAP2K1,AGTRAP,NF1,ATG7,PPP1CB,ITGB3
WP_SENESCENCE_AND_AUTOPHAGY_IN_CANCER	37/1792	108/13198	3.52946e-08	1.44644e-06	8.95031e-07	37	LAMP2,RB1CC1,CD44,GABARAPL2,PIK3C3,GSK3B,SH3GLB1,MAPK1,TGFB1,CDKN1B,MAPK14,SPARC,CDKN1A,IRF1,IL1B,RAF1,MDM2,RNASEL,THBS1,GABARAPL1,MAP1LC3B,SMAD4,CREG1,SLC39A1,ATG3,BRAF,IL6R,IFI16,CXCL1,ING2,MAP2K1,GABARAP,CEBPB,JUN,LAMP1,ATG7,SERPINB2
WP_ONCOSTATIN_M_SIGNALING_PATHWAY	27/1792	66/13198	3.673e-08	1.47838e-06	9.14798e-07	27	PXN,OSM,MAPK1,HIF1A,MAPK3,JAK3,CDKN1B,MAPK14,VEGFA,CREB1,PTK2B,JUND,RAF1,KRAS,JAK1,PRKCD,RICTOR,PRKCB,STAT3,MAP2K1,FOS,JUNB,CEBPB,RELA,STAT5B,GRB2,SOCS3
REACTOME_TOLL_LIKE_RECEPTOR_4_TLR4_CASCADE	41/1792	127/13198	4.49464e-08	1.77735e-06	1.0998e-06	41	BTK,TAB2,CASP8,MAP2K4,UBE2D1,DNM2,IRAK3,MAP3K1,MAPK1,MAPK3,RIPK2,VRK3,DUSP3,UBE2D3,MAPK14,PPP2CA,MAPKAPK3,RPS6KA1,CREB1,TANK,TLR4,DUSP6,PELI2,UBC,LY96,ITGB2,MAPKAPK2,S100A12,NOD2,MAP2K1,ITGAM,FOS,CD14,RELA,TLR1,PELI3,JUN,TBK1,PELI1,PLCG2,DNM3
KEGG_NATURAL_KILLER_CELL_MEDIATED_CYTOTOXICITY	43/1792	137/13198	5.34544e-08	2.07735e-06	1.28543e-06	43	TYROBP,BID,IFNGR1,LCP2,PIK3CB,MAPK1,SOS2,MAPK3,NFAT5,PIK3CG,TNFRSF10B,PTK2B,TNFSF10,RAC2,RAF1,KRAS,RAC1,PPP3CA,PIK3R5,VAV1,IFNAR1,PAK1,BRAF,FCER1G,IFNAR2,IFNGR2,ITGB2,FCGR3B,SYK,PRKCB,MAP2K1,PIK3CD,TNFRSF10C,GRB2,CHP1,KIR2DL4,PLCG2,FCGR3A,MICB,HLA-C,HLA-E,HLA-A,HLA-B
REACTOME_EPH_EPHRIN_SIGNALING	33/1792	92/13198	5.44432e-08	2.07992e-06	1.28702e-06	33	RHOA,ROCK1,CDC42,PSEN1,MYL6,MYH9,MMP9,MYL9,MYL12A,ARPC3,ACTR3,MYL12B,ARPC1B,ROCK2,RAC1,SDCBP,ADAM10,ACTR2,CLTC,PAK1,AP2M1,ARPC5,NCSTN,ARPC2,PTK2,PAK2,LIMK2,EPHB4,PSENEN,ITSN1,ARPC4,ARPC1A,LYN
WP_SPINAL_CORD_INJURY	39/1792	119/13198	6.03037e-08	2.26541e-06	1.4018e-06	39	VIM,VCAN,RHOA,CDC42,PTGS2,PLXNA2,FKBP1A,MAPK1,MMP9,TNFSF13B,MAPK3,XYLT1,TGFB1,CDKN1B,RTN4,IL1R1,ARG1,FOXO3,CCR2,NR4A1,IL1B,ZFP36,LILRB2,ROCK2,ANXA1,RAC1,TLR4,PPP3CA,FCGR2A,RHOB,BTG2,CXCL1,FOS,CHST11,SELP,MBP,AIF1,LILRB3,LTB4R
REACTOME_RHO_GTPASES_ACTIVATE_ROCKS	13/1792	19/13198	6.24762e-08	2.30855e-06	1.42849e-06	13	PPP1R12A,RHOA,ROCK1,PPP1R12B,MYL6,MYH9,MYL9,MYL12B,ROCK2,RHOB,PAK1,LIMK2,PPP1CB
BIOCARTA_PPARA_PATHWAY	23/1792	52/13198	6.61048e-08	2.37199e-06	1.46775e-06	23	PRKAR2B,CREBBP,PTGS2,HSP90AA1,NCOA1,MAPK1,EP300,MAPK3,PIK3CG,PRKAR1A,PRKAR2A,DUSP1,HSD17B4,NCOR1,ACOX1,PRKCB,RELA,STAT5B,JUN,SP1,RXRA,HSPA1A,SRA1
PID_AR_NONGENOMIC_PATHWAY	17/1792	31/13198	6.73502e-08	2.37199e-06	1.46775e-06	17	GNAI3,CDC42,GNB1,MAPK1,MAPK3,GNAI2,CREB1,GNAZ,RAF1,RAC1,PLCB3,MAP2K1,PTK2,FOS,PLCB1,GNG2,PLCG2
PID_AVB3_OPN_PATHWAY	17/1792	31/13198	6.73502e-08	2.37199e-06	1.46775e-06	17	CD44,RHOA,CDC42,MAP3K1,MAPK1,MMP9,MAPK3,SPP1,PTK2B,ROCK2,RAC1,SYK,ILK,FOS,RELA,JUN,ITGB3
REACTOME_ATTENUATION_PHASE	16/1792	28/13198	7.55957e-08	2.62143e-06	1.62209e-06	16	FKBP4,CREBBP,HSP90AA1,HSP90AB1,EP300,DNAJB6,HSPB1,HSPA8,PTGES3,HSPH1,DNAJB1,DEDD2,HSPA6,HSPA1B,HSPA1A,HSBP1
WP_PANCREATIC_ADENOCARCINOMA_PATHWAY	32/1792	89/13198	8.09405e-08	2.76424e-06	1.71047e-06	32	RALBP1,BAK1,PIK3CB,RHOA,CDC42,GADD45B,MAPK1,MAPK3,TGFB1,TGFBR1,E2F3,VEGFA,CDKN1A,RAC2,ARHGEF6,RAF1,KRAS,RAC1,DUSP6,SMAD4,RALB,PAK1,BRAF,JAK1,TGFA,TGFBR2,PRKCD,STAT3,MAP2K1,PIK3CD,RELA,PAK2
WP_HEPATITIS_B_INFECTION	46/1792	154/13198	9.8903e-08	3.32727e-06	2.05886e-06	46	CREBBP,BID,PIK3CB,TAB2,CASP8,MAP2K4,MAVS,MAP3K1,MAPK1,EP300,SOS2,MMP9,MAPK3,TGFB1,JAK3,TGFBR1,DDX58,MAPK14,CREB1,APAF1,PTK2B,CDKN1A,RAF1,KRAS,TLR4,SMAD4,IFNAR1,CREB5,BRAF,JAK1,TGFBR2,YWHAZ,PRKCB,STAT6,YWHAB,STAT3,MAP2K1,FOS,STAT2,PIK3CD,RELA,STAT5B,JUN,GRB2,TBK1,DDX3X
REACTOME_GPVI_MEDIATED_ACTIVATION_CASCADE	18/1792	35/13198	1.02714e-07	3.40467e-06	2.10675e-06	18	LCP2,PIK3CB,RHOA,CDC42,GP6,PIK3CG,RAC2,RAC1,PIK3R5,VAV1,RHOB,FCER1G,SYK,CLEC1B,RHOG,PLCG2,MPIG6B,LYN
REACTOME_SIGNALING_BY_TGF_BETA_RECEPTOR_COMPLEX	28/1792	73/13198	1.07147e-07	3.50014e-06	2.16583e-06	28	RHOA,UBE2D1,PPP1R15A,FKBP1A,CCNK,PPM1A,PARD6A,TGFB1,TGFBR1,UBE2D3,CBL,USP9X,UBE2M,USP15,SKIL,FURIN,NCOR1,SMAD4,PARD3,UBC,RNF111,SKI,F11R,TGFBR2,JUNB,SP1,TFDP1,PPP1CB
KEGG_ERBB_SIGNALING_PATHWAY	31/1792	87/13198	1.62862e-07	5.24415e-06	3.24499e-06	31	PIK3CB,MAP2K4,GSK3B,CRKL,MAPK1,SOS2,MAPK3,PIK3CG,GAB1,CBL,CDKN1B,HBEGF,CDKN1A,EREG,RAF1,KRAS,PIK3R5,PAK1,NRG1,BRAF,TGFA,PRKCB,CRK,MAP2K1,PTK2,PIK3CD,STAT5B,JUN,GRB2,PAK2,PLCG2
WP_IL6_SIGNALING_PATHWAY	20/1792	43/13198	1.71813e-07	5.45445e-06	3.37512e-06	20	CREBBP,MAP2K4,GSK3B,NCOA1,MAPK1,HCK,TIMP1,MAPK3,GAB1,IRF1,RAC1,VAV1,IL6R,JAK1,PRKCD,STAT3,MAP2K1,JUNB,GRB2,SOCS3
REACTOME_INTERFERON_ALPHA_BETA_SIGNALING	27/1792	71/13198	2.21551e-07	6.84575e-06	4.23603e-06	27	IFIT3,IFIT2,IRF1,IFI6,BST2,OASL,RNASEL,IFITM3,IFNAR1,IFIT5,MX1,IFNAR2,ADAR,JAK1,GBP2,IRF2,STAT2,ISG20,MX2,SOCS3,IFITM2,IFITM1,PSMB8,HLA-C,HLA-E,HLA-A,HLA-B
BIOCARTA_BCR_PATHWAY	17/1792	33/13198	2.26162e-07	6.84575e-06	4.23603e-06	17	BTK,MAP3K1,MAPK3,MAPK14,RAF1,RAC1,PPP3CA,VAV1,CALM2,CALM3,SYK,PRKCB,MAP2K1,FOS,JUN,GRB2,LYN
PID_IFNG_PATHWAY	19/1792	40/13198	2.30824e-07	6.84575e-06	4.23603e-06	19	CREBBP,IFNGR1,PIAS1,MAP3K1,CRKL,MAPK1,EP300,MAPK3,CBL,RAP1A,IRF1,IL1B,CASP1,JAK1,PRKCD,STAT3,MAP2K1,CEBPB,DAPK1
REACTOME_MAP2K_AND_MAPK_ACTIVATION	19/1792	40/13198	2.30824e-07	6.84575e-06	4.23603e-06	19	ITGA2B,VCL,MARK3,APBB1IP,MAPK1,MAPK3,LAMTOR3,VWF,RAP1A,RAF1,KRAS,TLN1,ARRB1,IQGAP1,ARRB2,BRAF,YWHAB,MAP2K1,ITGB3
WP_IL5_SIGNALING_PATHWAY	19/1792	40/13198	2.30824e-07	6.84575e-06	4.23603e-06	19	BTK,GSK3B,MAPK1,CSF2RB,MAPK3,PIK3CG,RPS6KA1,FOXO3,RAF1,KRAS,JAK1,SYK,STAT3,MAP2K1,FOS,STAT5B,JUN,GRB2,LYN
WP_LEPTIN_SIGNALING_PATHWAY	28/1792	76/13198	2.8834e-07	8.33228e-06	5.15587e-06	28	RHOA,ROCK1,CDC42,GSK3B,NCOA1,MAPK1,MAPK3,MAPK14,RPS6KA1,CREB1,IL1B,RAF1,PRKAA1,ROCK2,RAC1,IL1RN,JAK1,REL,STAT3,MAP2K1,PTK2,RELA,STAT5B,GRB2,SOCS3,SP1,KPNA4,PLCG2
WP_PROLACTIN_SIGNALING_PATHWAY	28/1792	76/13198	2.8834e-07	8.33228e-06	5.15587e-06	28	GAB2,PIK3CB,GSK3B,PXN,MAPK1,MAPK3,PIK3CG,CBL,MAPK14,CTSD,IRF1,RAF1,AGAP2,RAC1,VAV1,PAK1,JAK1,YWHAZ,STAT3,MAP2K1,PTK2,FOS,RELA,STAT5B,JUN,GRB2,SOCS3,SIRPA
WP_PHOTODYNAMIC_THERAPYINDUCED_HIF1_SURVIVAL_SIGNALING	18/1792	37/13198	3.05125e-07	8.59887e-06	5.32083e-06	18	BID,BAK1,SLC2A3,PKM,PTGS2,HIF1A,PGK1,BNIP3L,VEGFA,LDHA,EGLN1,BCL2A1,MCL1,ARNT,ANGPT1,HK1,TGFA,HIF1AN
REACTOME_INTERLEUKIN_3_INTERLEUKIN_5_AND_GM_CSF_SIGNALING	21/1792	48/13198	3.08907e-07	8.59887e-06	5.32083e-06	21	GAB2,PIK3CB,PRKACA,CRKL,CSF2RB,HCK,JAK3,CBL,VAV1,UBC,JAK1,YWHAZ,SYK,INPPL1,CRK,INPP5D,PIK3CD,STAT5B,GRB2,CSF2RA,LYN
KEGG_LEISHMANIA_INFECTION	27/1792	72/13198	3.0901e-07	8.59887e-06	5.32083e-06	27	IFNGR1,CYBA,TAB2,PTGS2,MAPK1,NCF4,MAPK3,TGFB1,MAPK14,NCF2,IL1B,TLR4,FCGR2A,FCGR1A,NCF1,IFNGR2,ITGB2,JAK1,FCGR3B,PRKCB,ITGAM,FOS,RELA,MARCKSL1,JUN,CR1,FCGR3A
BIOCARTA_AT1R_PATHWAY	15/1792	27/13198	3.22588e-07	8.86723e-06	5.48689e-06	15	MAP2K4,MAP3K1,MAPK1,MAPK3,PTK2B,RAF1,RAC1,CALM2,PAK1,GNAQ,CALM3,PRKCB,MAP2K1,JUN,GRB2
WP_KIT_RECEPTOR_SIGNALING_PATHWAY	24/1792	60/13198	3.45422e-07	9.38048e-06	5.80448e-06	24	BTK,GAB2,CRKL,MAPK1,EP300,MAPK3,GRB10,CBL,MAPK14,RPS6KA1,FOXO3,RAF1,VAV1,SH2B2,PRKCB,CRK,STAT3,INPP5D,MAP2K1,FOS,JUNB,STAT5B,GRB2,LYN
REACTOME_RHO_GTPASES_ACTIVATE_NADPH_OXIDASES	14/1792	24/13198	3.55214e-07	9.51933e-06	5.8904e-06	14	CYBA,PIK3C3,MAPK1,NCF4,MAPK3,MAPK14,NCF2,RAC2,RAC1,S100A8,NCF1,S100A9,PRKCD,PRKCB
REACTOME_RHO_GTPASES_ACTIVATE_PAKS	13/1792	21/13198	3.58981e-07	9.51933e-06	5.8904e-06	13	PPP1R12A,MYLK,CDC42,PPP1R12B,CTTN,MYL6,MYH9,MYL9,MYL12B,RAC1,PAK1,PAK2,PPP1CB
WP_INSULIN_SIGNALING	46/1792	161/13198	4.16664e-07	1.09205e-05	6.7574e-06	46	CYTH3,PIK3CB,MAP2K4,MAP4K4,STXBP2,PIK3C3,GSK3B,SNAP23,MAP3K1,MAPK1,SOS2,MAPK3,PIK3CG,GRB10,GAB1,EHD1,CBL,MAPK14,STXBP3,RPS6KA1,SGK1,FOXO3,RAC2,CAP1,RAF1,PRKAA1,FLOT2,RAC1,FLOT1,ARF1,SH2B2,GYG1,PRKCD,INPPL1,PRKCB,CRK,MAP2K1,MAP3K2,FOS,KIF5B,PIK3CD,JUN,GRB2,SOCS3,MAP3K5,MAP3K3
KEGG_CHRONIC_MYELOID_LEUKEMIA	27/1792	73/13198	4.27495e-07	1.10647e-05	6.84667e-06	27	GAB2,PIK3CB,CRKL,MAPK1,SOS2,MAPK3,TGFB1,PIK3CG,TGFBR1,CBL,CDKN1B,E2F3,CDKN1A,RAF1,KRAS,MDM2,PIK3R5,SMAD4,BRAF,TGFBR2,CRK,MAP2K1,PIK3CD,RELA,STAT5B,CTBP2,GRB2
PID_ILK_PATHWAY	20/1792	45/13198	4.31998e-07	1.10647e-05	6.84667e-06	20	PPP1R12A,CDC42,ACTN1,HSP90AA1,GSK3B,PXN,MYL9,CREB1,ARHGEF6,DIAPH1,RAC1,PARVG,GIT2,IQGAP1,RICTOR,ILK,CTNNB1,LIMS1,RHOG,JUN
REACTOME_SARS_COV_INFECTIONS	30/1792	86/13198	4.36895e-07	1.10647e-05	6.84667e-06	30	ROCK1,ST6GALNAC2,PIK3C3,GSK3B,FKBP1A,JAK3,IMPDH1,ST3GAL4,VEGFA,NR3C1,CHMP3,IL1R1,CHMP2A,ROCK2,PARP9,FURIN,MAP1LC3B,GALNT1,UBC,PARP8,ST3GAL2,IL6R,AP2M1,JAK1,VCP,CYSLTR1,TBK1,ST6GALNAC3,IL1RAP,TLR9
PID_LYSOPHOSPHOLIPID_PATHWAY	25/1792	65/13198	4.8063e-07	1.19048e-05	7.36651e-06	25	PIK3CB,GNAI3,RHOA,GNB1,GSK3B,PXN,MMP9,GAB1,HBEGF,GNAI2,GNA13,PTK2B,GNAZ,ADCY4,RAC1,PLCB3,GNAQ,PRKCD,CRK,PTK2,FOS,RELA,JUN,GNG2,LYN
REACTOME_SIGNALING_BY_BRAF_AND_RAF_FUSIONS	25/1792	65/13198	4.8063e-07	1.19048e-05	7.36651e-06	25	ITGA2B,KDM7A,VCL,MARK3,APBB1IP,MAPK1,MAPK3,VWF,QKI,FXR1,RAP1A,RAF1,AP3B1,KRAS,TLN1,ARRB1,IQGAP1,ARRB2,BRAF,LMNA,YWHAB,MAP2K1,AGTRAP,ATG7,ITGB3
REACTOME_EPHB_MEDIATED_FORWARD_SIGNALING	19/1792	42/13198	5.98891e-07	1.4515e-05	8.98166e-06	19	RHOA,ROCK1,CDC42,ARPC3,ACTR3,ARPC1B,ROCK2,RAC1,ACTR2,PAK1,ARPC5,ARPC2,PTK2,LIMK2,EPHB4,ITSN1,ARPC4,ARPC1A,LYN
WP_IL2_SIGNALING_PATHWAY	19/1792	42/13198	5.98891e-07	1.4515e-05	8.98166e-06	19	GAB2,CRKL,MAPK1,MAPK3,JAK3,CBL,FOXO3,PTK2B,NMI,RAF1,JAK1,SYK,STAT3,MAP2K1,FOS,STAT5B,JUN,GRB2,SOCS3
PID_IL8_CXCR1_PATHWAY	15/1792	28/13198	6.07578e-07	1.4569e-05	9.01502e-06	15	FGR,GNB1,HCK,PIK3CG,CBL,GNAI2,ARRB1,ARRB2,RAB5A,PLCB3,CXCR1,PRKCB,PLCB1,GNG2,LYN
KEGG_PANCREATIC_CANCER	26/1792	70/13198	6.33584e-07	1.50326e-05	9.30193e-06	26	RALBP1,PIK3CB,CDC42,MAPK1,MAPK3,TGFB1,PIK3CG,TGFBR1,E2F3,VEGFA,RAC2,ARHGEF6,RAF1,KRAS,RAC1,PIK3R5,SMAD4,RALB,BRAF,JAK1,TGFA,TGFBR2,STAT3,MAP2K1,PIK3CD,RELA
KEGG_LYSOSOME	37/1792	121/13198	9.17078e-07	2.15322e-05	1.33238e-05	37	LAMP2,IDS,ATP6V0A1,HEXB,CTSA,LAPTM4A,MCOLN1,CTSZ,GLA,ASAH1,MANBA,ARSB,ATP6V0B,CTSD,NPC2,CD68,PPT1,AP3B1,CD63,GNS,GALNS,CLTC,ATP6V0D1,LAPTM5,CTSS,CTSB,TPP1,GLB1,GAA,GBA,AP1S2,LAMP1,GM2A,IGF2R,ENTPD4,PSAP,NEU1
PID_THROMBIN_PAR1_PATHWAY	19/1792	43/13198	9.36994e-07	2.1773e-05	1.34728e-05	19	GNAI3,RHOA,ROCK1,GNB1,DNM2,GNAI2,GNA13,VASP,GNAZ,ROCK2,ARRB1,PLCB3,GNAQ,PRKCD,PRKCB,AKAP13,PLCB1,GNG2,SNX2
WP_EBOLA_VIRUS_PATHWAY_ON_HOST	39/1792	131/13198	1.00208e-06	2.30479e-05	1.42616e-05	39	CREBBP,PIK3CB,EIF2AK2,RHOA,CDC42,ACTN1,TSG101,RAB7A,ICAM3,MAPK1,EP300,MAPK3,DDX58,KPNA1,NPC2,BST2,ACTN4,RAC1,TLR4,IQGAP1,CLTC,RHOB,RAB5A,PAK1,ADAM17,ITGA5,TPCN2,REL,CTSB,PIK3CD,RELA,TBK1,SOCS3,TOP1,HLA-C,HLA-E,HLA-A,HLA-B,ITGB3
PID_IL2_1PATHWAY	22/1792	55/13198	1.05942e-06	2.41206e-05	1.49254e-05	22	GAB2,RHOA,MAPK1,MAPK3,JAK3,MAPK14,STAM2,PTK2B,RAF1,KRAS,STAM,JAK1,MAPKAPK2,SYK,PRKCB,STAT3,MAP2K1,FOS,STAT5B,JUN,GRB2,SOCS3
PID_GMCSF_PATHWAY	17/1792	36/13198	1.11165e-06	2.50567e-05	1.55047e-05	17	GAB2,PRKACA,OSM,MAPK1,CSF2RB,MAPK3,RAF1,KRAS,YWHAZ,SYK,STAT3,MAP2K1,FOS,STAT5B,GRB2,CSF2RA,LYN
WP_NONSMALL_CELL_LUNG_CANCER	26/1792	72/13198	1.18966e-06	2.65495e-05	1.64284e-05	26	BID,BAK1,PIK3CB,CASP8,GADD45B,MAPK1,SOS2,STK4,MAPK3,JAK3,E2F3,FOXO3,CDKN1A,RAF1,KRAS,BRAF,TGFA,PRKCB,STAT3,MAP2K1,PIK3CD,STAT5B,GRB2,RXRA,PLCG2,RASSF5
BIOCARTA_MAPK_PATHWAY	28/1792	81/13198	1.29563e-06	2.86308e-05	1.77162e-05	28	MAP2K4,MAP4K4,MAP3K1,MKNK2,MAPK1,MAPK3,TGFB1,TGFBR1,RAPGEF2,MAPK14,MAPKAPK3,RPS6KA1,CREB1,MAX,RAF1,RAC1,PAK1,MAPKAPK2,MAP2K1,MAP3K2,FOS,RELA,JUN,GRB2,PAK2,SP1,MAP3K5,MAP3K3
REACTOME_LEISHMANIA_INFECTION	72/1792	306/13198	1.35941e-06	2.97486e-05	1.84079e-05	72	FGR,PRKAR2B,BTK,WAS,CYBA,GNAI3,CDC42,PRKACA,GNB1,HSP90AB1,MAPK1,MYH9,HCK,MAPK3,MEFV,PRKAR1A,ARPC3,MAPK14,HRH2,PRKAR2A,GNAI2,GNB4,ACTR3,WIPF1,CREB1,IL1B,GNG11,GNAZ,ADCY4,ARPC1B,WASF3,RAC1,ABI1,TXN,CASP1,ACTR2,ENTPD1,PSTPIP1,FURIN,VAV1,FCGR2A,ADM,FCGR1A,ADAM17,CYSLTR2,ELMO1,WASF2,ARPC5,NLRP3,ARPC2,SYK,CRK,DPEP2,PTK2,GPR27,WIPF2,GNB2,RELA,CYSLTR1,GNG5,BAIAP2,JUN,GRB2,GNG2,MYO5A,PLCG2,FCGR3A,ARPC4,AR…
REACTOME_TOLL_LIKE_RECEPTOR_9_TLR9_CASCADE	31/1792	95/13198	1.48649e-06	3.22168e-05	1.99352e-05	31	TAB2,MAP2K4,PIK3C3,MAP3K1,MAPK1,TLR8,MAPK3,RIPK2,VRK3,DUSP3,MAPK14,PPP2CA,MAPKAPK3,RPS6KA1,CREB1,TLR4,DUSP6,PELI2,UBC,LY96,MAPKAPK2,S100A12,NOD2,MAP2K1,FOS,CD14,RELA,PELI3,JUN,PELI1,TLR9
WP_THE_HUMAN_IMMUNE_RESPONSE_TO_TUBERCULOSIS	13/1792	23/13198	1.5469e-06	3.32068e-05	2.05478e-05	13	IFNGR1,PIAS1,IFIT3,IRF1,IFNAR1,MX1,IFNAR2,IFNGR2,JAK1,TAP1,STAT2,IFITM1,PSMB8
WP_ANDROGEN_RECEPTOR_SIGNALING_PATHWAY	30/1792	91/13198	1.71703e-06	3.617e-05	2.23814e-05	30	FKBP4,CREBBP,PIAS1,RHOA,ROCK1,CDC42,GSK3B,NCOA1,EP300,ZMIZ1,KAT2B,CREB1,NCOA3,CDKN1A,ROCK2,MDM2,RAC1,NCOA2,NCOR1,SMAD4,RHOB,CTNNB1,STAT3,PTK2,RELA,NR2C2,JUN,LIMK2,SP1,NCOA4
WP_ERBB_SIGNALING_PATHWAY	30/1792	91/13198	1.71703e-06	3.617e-05	2.23814e-05	30	PIK3CB,MAP2K4,GSK3B,CRKL,MAPK1,SOS2,MAPK3,GAB1,CBL,CDKN1B,HBEGF,CDKN1A,EREG,RAF1,KRAS,MDM2,PAK1,NRG1,BRAF,TGFA,PRKCB,CRK,MAP2K1,PTK2,PIK3CD,STAT5B,JUN,GRB2,PAK2,PLCG2
WP_CHROMOSOMAL_AND_MICROSATELLITE_INSTABILITY_IN_COLORECTAL_CANCER	26/1792	74/13198	2.16623e-06	4.50155e-05	2.78548e-05	26	BAK1,RHOA,PTGS2,GSK3B,GADD45B,MAPK1,MAPK3,TGFB1,TGFBR1,CSNK1A1,CDKN1A,RAC2,RAF1,KRAS,APC,RAC1,SMAD4,RALB,BRAF,REL,TGFBR2,CTNNB1,MAP2K1,FOS,JUN,TBK1
REACTOME_DAP12_INTERACTIONS	19/1792	45/13198	2.17688e-06	4.50155e-05	2.78548e-05	19	BTK,TYROBP,LCP2,PIK3CB,SIRPB1,TREM1,KRAS,RAC1,SYK,B2M,GRB2,CD300LB,CD300E,PLCG2,HLA-C,HLA-E,HLA-B,SIGLEC14,CLEC5A
WP_REGULATION_OF_ACTIN_CYTOSKELETON	42/1792	150/13198	2.33548e-06	4.78562e-05	2.96126e-05	42	WAS,VCL,PIK3CB,PPP1R12A,MYLK,RHOA,ROCK1,CDC42,ACTN1,PIK3C3,PXN,MAPK1,SOS2,MAPK3,PIK3CG,GNA13,RAC2,ARHGEF6,FGF13,DIAPH1,RAF1,KRAS,ROCK2,APC,RAC1,IQGAP1,SSH2,PIK3R5,VAV1,MSN,PAK1,BRAF,WASF2,ARPC5,CRK,MAP2K1,PTK2,CD14,PIK3CD,BAIAP2,PAK2,TMSB4X
BIOCARTA_FMLP_PATHWAY	16/1792	34/13198	2.44266e-06	4.84533e-05	2.99821e-05	16	MAP3K1,MAPK1,MAPK3,MAPK14,NCF2,RAF1,RAC1,PPP3CA,CALM2,PAK1,NCF1,CALM3,MAP2K1,FPR1,RELA,PLCB1
REACTOME_SIGNALLING_TO_ERKS	16/1792	34/13198	2.44266e-06	4.84533e-05	2.99821e-05	16	CRKL,MAPK1,MAPK3,MAPK14,MAPKAPK3,RAP1A,KRAS,KIDINS220,RIT1,RALB,BRAF,MAPKAPK2,YWHAB,CRK,MAP2K1,GRB2
WP_SIGNALING_OF_HEPATOCYTE_GROWTH_FACTOR_RECEPTOR	16/1792	34/13198	2.44266e-06	4.84533e-05	2.99821e-05	16	PXN,CRKL,MAPK1,MAPK3,GAB1,RAP1A,PTK2B,RAF1,PAK1,CRK,STAT3,MAP2K1,PTK2,FOS,JUN,GRB2
REACTOME_TOLL_LIKE_RECEPTOR_TLR1_TLR2_CASCADE	31/1792	97/13198	2.45061e-06	4.84533e-05	2.99821e-05	31	BTK,TAB2,MAP2K4,IRAK3,MAP3K1,MAPK1,MAPK3,RIPK2,VRK3,DUSP3,MAPK14,PPP2CA,MAPKAPK3,RPS6KA1,CREB1,TLR4,DUSP6,PELI2,UBC,LY96,MAPKAPK2,S100A12,NOD2,MAP2K1,FOS,CD14,RELA,TLR1,PELI3,JUN,PELI1
WP_AGERAGE_PATHWAY	24/1792	66/13198	2.63519e-06	5.16496e-05	3.19599e-05	24	CASP8,RHOA,ROCK1,CDC42,MAPK1,HIF1A,MMP9,MAPK3,MAPK14,DIAPH1,RAF1,RAC1,MSN,NCF1,ALPL,PRKCD,PRKCB,STAT3,MAP2K1,RELA,STAT5B,JUN,FOXO4,SP1
REACTOME_AUTOPHAGY	42/1792	151/13198	2.81733e-06	5.47436e-05	3.38744e-05	42	LAMP2,RB1CC1,RRAGD,VIM,GABARAPL2,TSG101,PIK3C3,HSP90AA1,HSP90AB1,MTMR3,TUBB1,PLIN3,LAMTOR3,HSPA8,CHMP3,EPAS1,TUBA1B,TUBA4A,CHMP2A,PRKAA1,LAMTOR5,DYNC1LI2,GABARAPL1,VPS37B,MAP1LC3B,DYNC1LI1,ATG3,LAMTOR1,UBC,VPS37A,PINK1,UBAP1,VCP,TUBA1A,VPS37C,GABARAP,TUBA8,LAMTOR4,TUBB4B,NBR1,ATG7,ATG9A
PID_S1P_S1P2_PATHWAY	13/1792	24/13198	2.95526e-06	5.69329e-05	3.52291e-05	13	GNAI3,RHOA,MAPK1,MAPK3,MAPK14,GNAI2,GNA13,GNAZ,RAC1,PAK1,GNAQ,FOS,JUN
WP_TGFBETA_RECEPTOR_SIGNALING	22/1792	58/13198	3.0429e-06	5.81246e-05	3.59665e-05	22	CREBBP,LTBP1,TFE3,FKBP1A,EP300,MAPK3,TGFB1,TGFBR1,ENG,SPP1,SKIL,THBS1,SMAD4,SKI,JAK1,TGFBR2,CTNNB1,STAT3,ZEB2,FOS,JUN,LEFTY1
KEGG_INSULIN_SIGNALING_PATHWAY	39/1792	137/13198	3.41405e-06	6.41272e-05	3.96808e-05	39	PRKAR2B,PHKA2,PIK3CB,PRKACA,GSK3B,MKNK2,CRKL,MAPK1,SOS2,PYGL,MAPK3,PHKB,PIK3CG,PRKAR1A,CBL,PRKAR2A,RAF1,PRKAA1,FLOT2,PPP1R3D,KRAS,EIF4E2,FLOT1,PIK3R5,CALM2,HK1,BRAF,CALM3,HK3,SH2B2,FBP1,CRK,INPP5D,MAP2K1,PIK3CD,PPP1R3B,GRB2,SOCS3,PPP1CB
PID_P53_DOWNSTREAM_PATHWAY	39/1792	137/13198	3.41405e-06	6.41272e-05	3.96808e-05	39	NFYA,CREBBP,BID,BAK1,VCAN,RRM2B,NFYC,MAP4K4,CCNK,NLRC4,EP300,NDRG1,BNIP3L,VDR,E2F3,BCL6,ARID3A,CTSD,SPP1,DUSP1,APAF1,TNFRSF10B,CDKN1A,APC,MDM2,CASP1,BCL2A1,MCL1,BTG2,ZNF385A,ATF3,TGFA,TP53INP1,TAP1,TNFRSF10C,PLK3,JUN,SP1,TFDP1
KEGG_PATHWAYS_IN_CANCER	74/1792	325/13198	3.56008e-06	6.58219e-05	4.07295e-05	74	CREBBP,ITGA2B,BID,RALBP1,PIAS1,DAPK2,CTNNA1,PIK3CB,CASP8,SPI1,RHOA,CDC42,PTGS2,HSP90AA1,GSK3B,HSP90AB1,CRKL,MAPK1,EP300,SOS2,HIF1A,MMP9,STK4,MAPK3,TGFB1,PIK3CG,TGFBR1,CBL,CDKN1B,E2F3,VEGFA,EPAS1,CDKN1A,MAX,RAC2,FGF13,RARA,RAF1,KRAS,APC,MDM2,EGLN1,RAC1,PIK3R5,SMAD4,ARNT,TPM3,RALB,BRAF,JAK1,TGFA,TGFBR2,PRKCB,NKX3-1,CRK,CTNNB1,STAT3,MAP2K1,PTK2,FOS,PIK3CD,RELA,STAT5B,CTBP2,JUN,GRB2,CSF1R,RXRA,DAPK1,…
WP_MFAP5_EFFECT_ON_PERMEABILITY_AND_MOTILITY_OF_ENDOTHELIAL_CELLS_VIA_CYTOSKELETON_REARRANGEMENT	11/1792	18/13198	3.56268e-06	6.58219e-05	4.07295e-05	11	VCL,MYLK,ACTN1,PXN,MAPK1,MAPK3,CREB1,LPP,PTK2,JUN,ITGB3
REACTOME_SIGNALING_BY_NUCLEAR_RECEPTORS	69/1792	297/13198	3.61199e-06	6.59609e-05	4.08155e-05	69	FKBP4,POLR2J,CREBBP,MYLIP,GNAI3,PDK3,DHRS9,GNB1,HSP90AA1,NCOA1,AGO1,HSP90AB1,MAPK1,TNRC6B,EP300,YY1,MMP9,TBL1X,STAG2,MAPK3,POLR2C,HSPB1,PTGES3,CDKN1B,HBEGF,KAT2B,GNAI2,GNB4,KDM3A,STRN,CTSD,STAG1,CREB1,FOXO3,EEPD1,AGO2,NCOA3,EREG,FOSB,AGO3,KDM4B,GNG11,JUND,NR1H2,RARA,KRAS,AGO4,TLE3,NCOA2,NCOR1,ZDHHC7,CHD1,USF1,ABCG1,TGFA,RAD21,ABCA1,ALDH1A1,PTK2,FOS,PPID,ZNF217,GNB2,GNG5,TBL1XR1,JUN,SP1,RXRA,GNG2
KEGG_FOCAL_ADHESION	51/1792	199/13198	3.64429e-06	6.59609e-05	4.08155e-05	51	ITGA2B,VCL,PIK3CB,PPP1R12A,MYLK,RHOA,ROCK1,CDC42,ACTN1,GSK3B,ITGB5,PXN,CRKL,MAPK1,SOS2,MYL9,MYL12A,MAPK3,PIK3CG,VWF,VEGFA,RAP1A,MYL12B,SPP1,VASP,RAC2,ACTN4,DIAPH1,RAF1,ROCK2,RAC1,TLN1,THBS1,PARVG,PIK3R5,VAV1,PAK1,BRAF,ITGA5,ILK,PRKCB,CRK,CTNNB1,MAP2K1,PTK2,PIK3CD,JUN,GRB2,PAK2,PPP1CB,ITGB3
WP_TNF_ALPHA_SIGNALING_PATHWAY	30/1792	94/13198	3.65799e-06	6.59609e-05	4.08155e-05	30	CFLAR,CREBBP,BID,TNFRSF1B,CYBA,TAB2,CASP8,MAP2K4,TNFRSF1A,HSP90AA1,RFFL,MAP3K1,MAPK1,PYGL,MAPK3,PPP2CA,TNFAIP3,APAF1,RAF1,KRAS,GLUL,RAC1,TANK,TXN,REL,JUN,GRB2,TBK1,MAP3K5,MAP3K3
KEGG_VEGF_SIGNALING_PATHWAY	26/1792	76/13198	3.83307e-06	6.85694e-05	4.24296e-05	26	SH2D2A,PIK3CB,CDC42,PTGS2,PXN,MAPK1,MAPK3,NFAT5,PIK3CG,HSPB1,MAPK14,VEGFA,MAPKAPK3,RAC2,RAF1,KRAS,RAC1,PPP3CA,PIK3R5,MAPKAPK2,PRKCB,MAP2K1,PTK2,PIK3CD,CHP1,PLCG2
PID_ENDOTHELIN_PATHWAY	23/1792	63/13198	3.9218e-06	6.96042e-05	4.30699e-05	23	GNAI3,RHOA,CDC42,MAPK1,MAPK3,MAPK14,GNAI2,PTK2B,GNAZ,ADCY4,RAF1,RAC1,PLCB3,CYSLTR2,GNAQ,PRKCD,PRKCB,CRK,MAP2K1,FOS,CYSLTR1,JUN,PLCB1
WP_HUMAN_COMPLEMENT_SYSTEM	31/1792	99/13198	3.96396e-06	6.98029e-05	4.31928e-05	31	ITGA2B,PLAUR,WAS,GNAI3,PRKACA,CD59,FCN1,SELPLG,CSNK1A1,GNAI2,CD46,SPP1,C4BPA,F13A1,CD93,CFP,TXN,THBS1,ARRB2,ADM,SERPING1,ITGB2,FPR1,SELP,PROS1,SELL,CD55,C5AR1,CR1,FCGR3A,ITGB3
REACTOME_ESR_MEDIATED_SIGNALING	55/1792	221/13198	4.04123e-06	7.06118e-05	4.36934e-05	55	FKBP4,POLR2J,CREBBP,GNAI3,GNB1,HSP90AA1,NCOA1,AGO1,HSP90AB1,MAPK1,TNRC6B,EP300,YY1,MMP9,STAG2,MAPK3,POLR2C,HSPB1,PTGES3,CDKN1B,HBEGF,KAT2B,GNAI2,GNB4,STRN,CTSD,STAG1,CREB1,FOXO3,AGO2,NCOA3,EREG,FOSB,AGO3,KDM4B,GNG11,JUND,KRAS,AGO4,TLE3,NCOA2,ZDHHC7,CHD1,USF1,TGFA,RAD21,PTK2,FOS,PPID,ZNF217,GNB2,GNG5,JUN,SP1,GNG2
REACTOME_FCGAMMA_RECEPTOR_FCGR_DEPENDENT_PHAGOCYTOSIS	40/1792	143/13198	4.14151e-06	7.18075e-05	4.44332e-05	40	FGR,BTK,WAS,PIK3CB,CDC42,HSP90AA1,HSP90AB1,MAPK1,MYH9,HCK,MAPK3,ARPC3,ACTR3,WIPF1,ARPC1B,WASF3,RAC1,ABI1,ACTR2,VAV1,FCGR2A,PAK1,FCGR1A,ELMO1,WASF2,ARPC5,ARPC2,PRKCD,SYK,CRK,PTK2,WIPF2,BAIAP2,GRB2,MYO5A,PLCG2,FCGR3A,ARPC4,ARPC1A,LYN
WP_INTERFERON_TYPE_I_SIGNALING_PATHWAYS	21/1792	55/13198	4.49754e-06	7.73851e-05	4.78846e-05	21	GAB2,PIAS1,PTPRC,MAP3K1,CRKL,CBL,MAPK14,RAP1A,CREB1,RAC1,VAV1,IFNAR1,PDCD4,IFNAR2,JAK1,REL,CRK,STAT3,STAT2,PIK3CD,SOCS3
SIG_INSULIN_RECEPTOR_PATHWAY_IN_CARDIAC_MYOCYTES	20/1792	51/13198	4.68034e-06	7.99204e-05	4.94534e-05	20	CYTH3,CDC42,GSK3B,MAPK1,SOS2,MAPK3,PARD6A,CBL,RPS6KA1,YWHAH,CAP1,RAF1,FLOT2,FLOT1,PARD3,YWHAZ,INPPL1,YWHAB,PIK3CD,GRB2
KEGG_EPITHELIAL_CELL_SIGNALING_IN_HELICOBACTER_PYLORI_INFECTION	24/1792	68/13198	4.82982e-06	8.08731e-05	5.00429e-05	24	ATP6V0A1,MAP2K4,CDC42,ATP6V1D,MAPK14,HBEGF,ATP6V0E1,ATP6V1A,ATP6V0B,ATP6V1E1,RAC1,ADAM10,ATP6V1B2,PAK1,ADAM17,F11R,ATP6V0D1,CXCR1,CXCL1,RELA,JUN,CXCR2,PLCG2,LYN
WP_MELANOMA	24/1792	68/13198	4.82982e-06	8.08731e-05	5.00429e-05	24	BAK1,VCL,PIK3CB,GADD45B,MAPK1,SOS2,MAPK3,LAMTOR3,E2F3,CREB1,CDKN1A,RAF1,KRAS,MDM2,RAC1,CALM2,PAK1,BRAF,CALM3,MAP2K1,FOS,PIK3CD,GRB2,NF1
WP_VITAMIN_D_RECEPTOR_PATHWAY	48/1792	185/13198	4.84377e-06	8.08731e-05	5.00429e-05	48	ALOX5,SERPINB1,TIMP2,MXD1,ATP2B1,CEACAM1,HIF1A,TGFB1,CDKN1B,VDR,BCL6,TNFSF4,TNFAIP3,SPP1,ADGRE5,LPGAT1,G0S2,TREM1,CDKN1A,STEAP4,CDKN2D,CRACR2A,NINJ1,KL,SLC37A2,STAM,KLF4,DUSP10,S100A8,ASAP2,G6PD,S100A9,CTLA4,CAMP,LGALS9,ITGAM,CD14,JUNB,LRRC25,THBD,SLC8A1,MX2,RXRA,S100A4,EPHB4,S100A6,ORM2,ORM1
REACTOME_SEMAPHORIN_INTERACTIONS	23/1792	64/13198	5.34209e-06	8.83953e-05	5.46975e-05	23	TYROBP,RHOA,ROCK1,PLXNA2,HSP90AA1,PTPRC,GSK3B,MYL6,HSP90AB1,MYH9,MYL9,MYL12B,ARHGEF11,ROCK2,PLXNC1,RAC1,TLN1,RHOB,PAK1,PAK2,LIMK2,SEMA4D,SEMA4A
REACTOME_G_PROTEIN_BETA_GAMMA_SIGNALLING	15/1792	32/13198	5.37274e-06	8.83953e-05	5.46975e-05	15	BTK,RHOA,CDC42,GNB1,PIK3CG,GNB4,GNG11,ARHGEF6,PIK3R5,PAK1,PLCB3,GNB2,GNG5,PLCB1,GNG2
WP_TCELL_ANTIGEN_RECEPTOR_TCR_SIGNALING_PATHWAY	29/1792	91/13198	5.46142e-06	8.92032e-05	5.51975e-05	29	WAS,VIM,GAB2,LCP2,CDC42,CRKL,MAPK1,MAPK3,RIPK2,TGFB1,CBL,SH2B3,MAPK14,CREB1,PTK2B,IL1B,RAF1,PSTPIP1,VAV1,BCL10,PAK1,REL,PRKCD,CRK,MAP2K1,FOS,RELA,JUN,GRB2
KEGG_ADHERENS_JUNCTION	25/1792	73/13198	5.73331e-06	9.23834e-05	5.71653e-05	25	CREBBP,WAS,VCL,CTNNA1,RHOA,CDC42,ACTN1,MAPK1,EP300,MAPK3,TGFBR1,NECTIN1,RAC2,NECTIN2,ACTN4,WASF3,RAC1,IQGAP1,SMAD4,PARD3,PTPRJ,WASF2,TGFBR2,CTNNB1,BAIAP2
ST_INTEGRIN_SIGNALING_PATHWAY	27/1792	82/13198	5.7381e-06	9.23834e-05	5.71653e-05	27	WAS,PIK3CB,MYLK,MAP2K4,ROCK1,CDC42,ACTN1,MAPK1,SOS2,ACTR3,VASP,ARHGEF6,RAF1,ROCK2,TLN1,ACTR2,ARHGAP26,PAK1,ASAP1,BRAF,ITGA5,ILK,CRK,PTK2,GRB2,PAK2,PLCG2
WP_FOCAL_ADHESION	51/1792	202/13198	5.78394e-06	9.24609e-05	5.72132e-05	51	FGR,ITGA2B,VCL,PIK3CB,PPP1R12A,MYLK,RHOA,ROCK1,CDC42,ACTN1,PPP1R12B,GSK3B,ITGB5,PXN,CRKL,MAPK1,MYL9,HCK,MYL12A,MAPK3,VWF,VEGFA,RAP1A,MYL12B,SPP1,VASP,RAC2,ACTN4,DIAPH1,RAF1,ROCK2,RAC1,TLN1,THBS1,PARVG,VAV1,PAK1,BRAF,ITGA5,ILK,PRKCB,CRK,CTNNB1,MAP2K1,PTK2,PIK3CD,JUN,GRB2,PAK2,PPP1CB,ITGB3
WP_REGULATION_OF_TOLLLIKE_RECEPTOR_SIGNALING_PATHWAY	40/1792	145/13198	6.00685e-06	9.53482e-05	5.89998e-05	40	BTK,PIK3CB,TAB2,CASP8,MAP2K4,OTUD5,CYLD,IRAK3,MAPK1,TLR8,MAPK3,PIK3CG,MAPK14,CD86,TNFAIP3,SPP1,TREM1,IL1B,TRAFD1,RAC1,TLR4,PELI2,PIK3R5,IFNAR1,LY96,IFNAR2,SYK,MAP2K1,FOS,CD14,PIK3CD,RELA,TLR1,PELI3,JUN,RNF41,TBK1,TLR5,PELI1,TLR9
WP_HOSTPATHOGEN_INTERACTION_OF_HUMAN_CORONA_VIRUSES_MAPK_SIGNALING	16/1792	36/13198	6.19229e-06	9.76044e-05	6.03959e-05	16	MAP2K4,MAP3K1,MAPK1,MAPK3,MAPK14,RPS6KA1,BST2,RAF1,IFITM3,MAP2K1,FOS,JUNB,DDIT3,JUN,IFITM2,IFITM1
PID_EPHB_FWD_PATHWAY	17/1792	40/13198	6.69429e-06	0.000104062	6.43915e-05	17	ROCK1,CDC42,MAP4K4,PXN,MAPK1,MAPK3,RAP1A,KRAS,RAC1,PAK1,SYNJ1,CRK,MAP2K1,PTK2,GRB2,EPHB4,ITSN1
PID_ER_NONGENOMIC_PATHWAY	17/1792	40/13198	6.69429e-06	0.000104062	6.43915e-05	17	GNAI3,RHOA,GNB1,MMP9,HBEGF,GNAI2,STRN,GNA13,GNAZ,KRAS,ROCK2,MSN,PLCB3,GNAQ,GRB2,PLCB1,GNG2
WP_PDGFRBETA_PATHWAY	14/1792	29/13198	7.2085e-06	0.000111287	6.88627e-05	14	EIF2AK2,MAP2K4,MAP3K1,MAPK3,RAF1,JAK1,PRKCB,STAT6,STAT3,MAP2K1,FOS,STAT5B,JUN,GRB2
REACTOME_RHO_GTPASES_ACTIVATE_CIT	11/1792	19/13198	7.42098e-06	0.000113788	7.04103e-05	11	PPP1R12A,RHOA,PPP1R12B,MYL6,MYH9,MYL9,CDKN1B,MYL12B,RAC1,RHOB,PPP1CB
REACTOME_SIGNALING_BY_NOTCH1	25/1792	74/13198	7.55325e-06	0.000115034	7.1181e-05	25	CREBBP,ITCH,PSEN1,EP300,HIF1A,JAG1,MIB1,TBL1X,TLE4,KAT2B,NUMB,ARRB1,ADAM10,TLE3,NCOR1,ARRB2,UBC,ADAM17,MAML1,NCSTN,HEY1,RBPJ,TBL1XR1,MAML3,PSENEN
REACTOME_SIGNALING_BY_TGFB_FAMILY_MEMBERS	31/1792	102/13198	7.88521e-06	0.000119284	7.38107e-05	31	ZFYVE16,RHOA,UBE2D1,PPP1R15A,FKBP1A,CCNK,PPM1A,PARD6A,TGFB1,TGFBR1,UBE2D3,CBL,USP9X,UBE2M,ACVR1B,USP15,SKIL,FURIN,NCOR1,SMAD4,PARD3,UBC,RNF111,SKI,F11R,FSTL1,TGFBR2,JUNB,SP1,TFDP1,PPP1CB
KEGG_FC_EPSILON_RI_SIGNALING_PATHWAY	26/1792	79/13198	8.58511e-06	0.000128633	7.95961e-05	26	BTK,GAB2,LCP2,PIK3CB,MAP2K4,MAPK1,SOS2,MAPK3,PIK3CG,MAPK14,RAC2,RAF1,KRAS,RAC1,PIK3R5,VAV1,FCER1G,PRKCD,SYK,PRKCB,INPP5D,MAP2K1,PIK3CD,GRB2,PLCG2,LYN
BIOCARTA_MET_PATHWAY	15/1792	33/13198	8.6174e-06	0.000128633	7.95961e-05	15	CRKL,MAPK1,MAPK3,PIK3CG,GAB1,RAP1A,PTK2B,RAF1,PAK1,CRK,STAT3,MAP2K1,FOS,JUN,GRB2
REACTOME_MAPK_FAMILY_SIGNALING_CASCADES	73/1792	327/13198	8.6757e-06	0.000128651	7.96073e-05	73	ITGA2B,VCL,CUL3,PIK3CB,PPP2R5A,PPP2R5B,CDC42,PRKACA,MARK3,APBB1IP,PSME1,AGO1,MAPK1,TNRC6B,CSF2RB,MAPK3,JAK3,HSPB1,SHOC2,LAMTOR3,RAPGEF2,VWF,DUSP16,HBEGF,PPP2CA,RAP1A,FOXO3,DUSP1,TEK,KBTBD7,AGO2,NCOA3,EREG,AGO3,PSME3,DNAJB1,RAF1,KL,KRAS,AGO4,RAC1,TLN1,ARRB1,DUSP6,IQGAP1,ARRB2,DUSP10,GOLGA7,PAK1,CDC42EP2,UBC,ANGPT1,PDE6D,NRG1,BRAF,DUSP2,IL6R,JAK1,TGFA,YWHAB,MAP2K1,PTK2,RASGRP4,JUN,GRB2,PAK2,NF1,CSF…
PID_NFAT_3PATHWAY	20/1792	53/13198	9.31573e-06	0.00013724	8.49215e-05	20	CREBBP,PRKACA,GSK3B,FKBP1A,MAP3K1,EP300,MAPK3,KPNB1,MAPK14,CSNK1A1,MEF2D,NR4A1,NUP214,YWHAH,PPP3CA,PRKCD,YWHAZ,PRKCB,YWHAB,CHP1
REACTOME_NR1H3_NR1H2_REGULATE_GENE_EXPRESSION_LINKED_TO_CHOLESTEROL_TRANSPORT_AND_EFFLUX	16/1792	37/13198	9.54093e-06	0.000137854	8.53019e-05	16	NCOA1,AGO1,TNRC6B,EP300,TBL1X,KDM3A,EEPD1,AGO2,AGO3,NR1H2,AGO4,NCOR1,ABCG1,ABCA1,TBL1XR1,RXRA
REACTOME_POTENTIAL_THERAPEUTICS_FOR_SARS	16/1792	37/13198	9.54093e-06	0.000137854	8.53019e-05	16	ROCK1,FKBP1A,JAK3,IMPDH1,VEGFA,NR3C1,IL1R1,ROCK2,FURIN,IL6R,AP2M1,JAK1,CYSLTR1,TBK1,IL1RAP,TLR9
WP_TYPE_II_INTERFERON_SIGNALING_IFNG	16/1792	37/13198	9.54093e-06	0.000137854	8.53019e-05	16	IFNGR1,EIF2AK2,SPI1,GBP1,IFIT2,IRF1,IL1B,IFI6,IFNGR2,JAK1,PRKCD,IRF2,TAP1,STAT2,SOCS3,HLA-B
PID_ERBB1_INTERNALIZATION_PATHWAY	17/1792	41/13198	9.99697e-06	0.000143423	8.87476e-05	17	PIK3CB,CDC42,UBE2D1,TSG101,UBE2D3,CBL,CHMP3,RAF1,KRAS,USP8,RAB5A,SH3KBP1,SYNJ1,PTK2,PIK3CD,GRB2,ITSN1
REACTOME_SIGNALING_BY_MODERATE_KINASE_ACTIVITY_BRAF_MUTANTS	18/1792	45/13198	1.00536e-05	0.000143423	8.87476e-05	18	ITGA2B,VCL,MARK3,APBB1IP,MAPK1,MAPK3,VWF,RAP1A,RAF1,KRAS,TLN1,ARRB1,IQGAP1,ARRB2,BRAF,YWHAB,MAP2K1,ITGB3
KEGG_COLORECTAL_CANCER	22/1792	62/13198	1.0781e-05	0.000151878	9.39795e-05	22	PIK3CB,RHOA,GSK3B,MAPK1,MAPK3,TGFB1,PIK3CG,TGFBR1,RAC2,RAF1,KRAS,APC,RAC1,PIK3R5,SMAD4,BRAF,TGFBR2,CTNNB1,MAP2K1,FOS,PIK3CD,JUN
WP_TGFBETA_RECEPTOR_SIGNALLING_IN_SKELETAL_DYSPLASIAS	22/1792	62/13198	1.0781e-05	0.000151878	9.39795e-05	22	CREBBP,LTBP1,TFE3,FKBP1A,EP300,MAPK3,TGFB1,TGFBR1,ENG,SPP1,SKIL,THBS1,SMAD4,SKI,JAK1,TGFBR2,CTNNB1,STAT3,ZEB2,FOS,JUN,LEFTY1
BIOCARTA_GPCR_PATHWAY	14/1792	30/13198	1.18313e-05	0.000163606	0.000101237	14	PRKAR2B,MAPK3,PRKAR1A,PRKAR2A,CREB1,RAF1,PPP3CA,CALM2,GNAQ,CALM3,PRKCB,MAP2K1,FOS,JUN
PID_NECTIN_PATHWAY	14/1792	30/13198	1.18313e-05	0.000163606	0.000101237	14	CTNNA1,CDC42,PVR,NECTIN1,RAP1A,NECTIN2,RAC1,TLN1,IQGAP1,F11R,CRK,CTNNB1,PTK2,ITGB3
PID_P38_ALPHA_BETA_PATHWAY	14/1792	30/13198	1.18313e-05	0.000163606	0.000101237	14	FGR,MAP2K4,CDC42,HCK,DUSP16,MAPK14,DUSP1,RAC1,DUSP10,RALB,PAK1,PAK2,MAP3K3,LYN
WP_BRAINDERIVED_NEUROTROPHIC_FACTOR_BDNF_SIGNALING_PATHWAY	39/1792	144/13198	1.25345e-05	0.000172273	0.000106599	39	SYN1,CDKL5,CDC42,GSK3B,MAP3K1,MAPK1,MAPK3,MAPK14,PPP2CA,RAP1A,NCF2,RPS6KA1,CREB1,FOXO3,SPP1,PTK2B,RAF1,PRKAA1,KIDINS220,APC,RAC1,ADAM17,NCF1,SH2B2,ALPL,PRKCD,CTNNB1,STAT3,MAP2K1,MAP3K2,FOS,CDH2,RELA,STAT5B,RHOG,JUN,GRB2,SIRPA,MARCKS
SIG_PIP3_SIGNALING_IN_CARDIAC_MYOCTES	23/1792	67/13198	1.28438e-05	0.00017441	0.000107922	23	CYTH3,CDC42,GSK3B,SOS2,PARD6A,GAB1,CDKN1B,RPS6KA1,CREB1,FOXO3,PREX1,YWHAH,PIK3R5,CREB5,PARD3,PAK1,YWHAZ,INPPL1,YWHAB,PTK2,PIK3CD,GRB2,PAK2
KEGG_NON_SMALL_CELL_LUNG_CANCER	20/1792	54/13198	1.29222e-05	0.00017441	0.000107922	20	PIK3CB,MAPK1,SOS2,STK4,MAPK3,PIK3CG,E2F3,FOXO3,RAF1,KRAS,PIK3R5,BRAF,TGFA,PRKCB,MAP2K1,PIK3CD,GRB2,RXRA,PLCG2,RASSF5
WP_APOPTOSISRELATED_NETWORK_DUE_TO_ALTERED_NOTCH3_IN_OVARIAN_CANCER	20/1792	54/13198	1.29222e-05	0.00017441	0.000107922	20	VIM,CTNNA1,HSPA5,BCL3,MAPK1,RIPK2,HSPB1,CDKN1B,TNFRSF10B,PTK2B,CDKN1A,JUND,IER3,THBS1,NRG1,ANXA5,PTK2,ERN1,PAK2,SOCS3
BIOCARTA_INTEGRIN_PATHWAY	15/1792	34/13198	1.34922e-05	0.000179949	0.000111349	15	CAPN1,VCL,RHOA,ROCK1,ACTN1,PPP1R12B,CRKL,MAPK1,MAPK3,RAP1A,RAF1,TLN1,MAP2K1,JUN,GRB2
PID_MAPK_TRK_PATHWAY	15/1792	34/13198	1.34922e-05	0.000179949	0.000111349	15	MAPK1,MAPK3,MAPK14,RAP1A,RPS6KA1,CREB1,RAF1,KRAS,RIT1,BRAF,MAPKAPK2,PRKCD,MAP2K1,MAP3K2,FOS
REACTOME_HSF1_DEPENDENT_TRANSACTIVATION	16/1792	38/13198	1.44128e-05	0.00018847	0.000116622	16	FKBP4,CREBBP,HSP90AA1,HSP90AB1,EP300,DNAJB6,HSPB1,HSPA8,PTGES3,HSPH1,DNAJB1,DEDD2,HSPA6,HSPA1B,HSPA1A,HSBP1
REACTOME_OVARIAN_TUMOR_DOMAIN_PROTEASES	16/1792	38/13198	1.44128e-05	0.00018847	0.000116622	16	ZRANB1,RHOA,OTUD5,UBE2D1,MAVS,RIPK2,DDX58,TNFAIP3,TRIM25,APC,TNIP1,UBC,VCP,NOD2,VCPIP1,YOD1
BIOCARTA_KERATINOCYTE_PATHWAY	18/1792	46/13198	1.44342e-05	0.00018847	0.000116622	18	TNFRSF1B,MAP2K4,TNFRSF1A,MAP3K1,MAPK1,MAPK3,MAPK14,PPP2CA,RAF1,ETS2,PRKCD,PRKCB,MAP2K1,FOS,RELA,JUN,SP1,MAP3K5
REACTOME_SEMA4D_INDUCED_CELL_MIGRATION_AND_GROWTH_CONE_COLLAPSE	11/1792	20/13198	1.44655e-05	0.00018847	0.000116622	11	RHOA,ROCK1,MYL6,MYH9,MYL9,MYL12B,ARHGEF11,ROCK2,RHOB,LIMK2,SEMA4D
PID_NOTCH_PATHWAY	21/1792	59/13198	1.61157e-05	0.00020698	0.000128076	21	SPEN,MARK2,ITCH,PSEN1,EP300,YY1,JAG1,MIB1,RAB11A,CBL,CDKN1A,NUMB,NOTCH2,ADAM10,FURIN,NCOR1,MAML1,NCSTN,RBPJ,PSENEN,MYCBP
PID_S1P_S1P4_PATHWAY	9/1792	14/13198	1.61617e-05	0.00020698	0.000128076	9	GNAI3,RHOA,CDC42,MAPK1,MAPK3,GNAI2,GNA13,S1PR4,GNAZ
REACTOME_PROLONGED_ERK_ACTIVATION_EVENTS	9/1792	14/13198	1.61617e-05	0.00020698	0.000128076	9	CRKL,MAPK1,MAPK3,RAP1A,KIDINS220,BRAF,YWHAB,CRK,MAP2K1
WP_ASSOCIATION_BETWEEN_PHYSICOCHEMICAL_FEATURES_AND_TOXICITY_ASSOCIATED_PATHWAYS	23/1792	68/13198	1.69399e-05	0.000214508	0.000132734	23	MYLK,MAP2K4,RHOA,GSK3B,MAPK1,PIK3CG,CBL,CDKN1B,PPP2CA,ACTR3,CDKN1A,RAF1,ROCK2,APC,ACTR2,PAK1,TGFA,CTNNB1,MAP2K1,PTK2,JUN,GRB2,TMSB4X
WP_HUMAN_THYROID_STIMULATING_HORMONE_TSH_SIGNALING_PATHWAY	23/1792	68/13198	1.69399e-05	0.000214508	0.000132734	23	GNAI3,GNB1,MAPK1,MAPK3,CDKN1B,MAPK14,PDE4D,GNAI2,RAP1A,RPS6KA1,CREB1,MYL12B,GNA13,RAF1,GNAQ,BRAF,JAK1,STAT3,MAP2K1,FOS,JUN,PLCB1,GNG2
REACTOME_NUCLEOTIDE_BINDING_DOMAIN_LEUCINE_RICH_REPEAT_CONTAINING_RECEPTOR_NLR_SIGNALING_PATHWAYS	20/1792	55/13198	1.77362e-05	0.000223338	0.000138198	20	TAB2,CASP8,ITCH,CYLD,NLRC4,HSP90AB1,MEFV,RIPK2,MAPK14,TNFAIP3,TXN,CASP1,PSTPIP1,UBC,NLRP3,AIM2,NOD2,RELA,CASP4,TXNIP
PID_REG_GR_PATHWAY	26/1792	82/13198	1.82051e-05	0.000226709	0.000140284	26	FKBP4,CREBBP,SPI1,PRKACA,TSG101,HSP90AA1,GSK3B,NCOA1,MAPK1,EP300,MAPK3,MAPK14,NR3C1,CREB1,SGK1,NR4A1,CDKN1A,IRF1,YWHAH,MDM2,NCOA2,FOS,RELA,STAT5B,JUN,PBX1
PID_SMAD2_3NUCLEAR_PATHWAY	26/1792	82/13198	1.82051e-05	0.000226709	0.000140284	26	CREBBP,TFE3,ITGB5,NCOA1,EP300,HSPA8,VDR,NR3C1,KAT2B,CREB1,FOXO3,CDKN1A,MAX,SKIL,NCOA2,NCOR1,SMAD4,SKI,ATF3,FOS,CEBPB,SP3,JUN,FOXO4,SP1,TFDP1
REACTOME_HSF1_ACTIVATION	14/1792	31/13198	1.88877e-05	0.000233364	0.000144402	14	FKBP4,HSP90AA1,HSP90AB1,DNAJB6,HSPB1,PTGES3,HSPH1,DNAJB1,DEDD2,VCP,HSPA6,HSPA1B,HSPA1A,HSBP1
REACTOME_INTERLEUKIN_4_AND_INTERLEUKIN_13_SIGNALING	32/1792	111/13198	1.89466e-05	0.000233364	0.000144402	32	ALOX5,VIM,TNFRSF1B,PTGS2,HSP90AA1,OSM,HMOX1,HIF1A,MMP9,TIMP1,TGFB1,JAK3,HSPA8,VEGFA,BCL6,FOXO3,F13A1,CDKN1A,IL1B,ANXA1,MCL1,LCN2,ITGB2,IL6R,JAK1,STAT6,STAT3,ITGAM,FOS,JUNB,SOCS3,CEBPD
PID_PI3KCI_AKT_PATHWAY	15/1792	35/13198	2.06607e-05	0.000253093	0.00015661	15	PRKACA,HSP90AA1,GSK3B,CDKN1B,KPNA1,FOXO3,CDKN1A,YWHAH,RAF1,RICTOR,YWHAZ,YWHAB,FOXO4,MAP3K5,PRKDC
REACTOME_SEMA4D_IN_SEMAPHORIN_SIGNALING	12/1792	24/13198	2.0987e-05	0.000254326	0.000157373	12	RHOA,ROCK1,MYL6,MYH9,MYL9,MYL12B,ARHGEF11,ROCK2,RAC1,RHOB,LIMK2,SEMA4D
SA_B_CELL_RECEPTOR_COMPLEXES	12/1792	24/13198	2.0987e-05	0.000254326	0.000157373	12	MAP3K1,MAPK1,MAPK3,RPS6KA1,RAC1,VAV1,SYK,MAP2K1,FOS,JUN,GRB2,LYN
PID_CXCR3_PATHWAY	17/1792	43/13198	2.12306e-05	0.000254541	0.000157506	17	PIK3CB,GNAI3,GNB1,MAPK1,MAPK3,MAPK14,GNAI2,GNAZ,RAF1,KRAS,ARRB1,ITGB2,PF4,RICTOR,MAP2K1,PIK3CD,GNG2
REACTOME_NEGATIVE_REGULATION_OF_MAPK_PATHWAY	17/1792	43/13198	2.12306e-05	0.000254541	0.000157506	17	PPP2R5A,PPP2R5B,MARK3,MAPK1,MAPK3,DUSP16,PPP2CA,DUSP1,RAF1,KRAS,DUSP6,DUSP10,UBC,BRAF,DUSP2,YWHAB,MAP2K1
REACTOME_MYD88_INDEPENDENT_TLR4_CASCADE_	29/1792	97/13198	2.16637e-05	0.00025836	0.000159869	29	TAB2,CASP8,MAP2K4,UBE2D1,MAPK1,MAPK3,RIPK2,VRK3,DUSP3,UBE2D3,MAPK14,PPP2CA,MAPKAPK3,RPS6KA1,CREB1,TANK,TLR4,DUSP6,UBC,LY96,MAPKAPK2,S100A12,NOD2,MAP2K1,FOS,CD14,RELA,JUN,TBK1
WP_MYOMETRIAL_RELAXATION_AND_CONTRACTION_PATHWAYS	41/1792	158/13198	2.31529e-05	0.000274666	0.000169959	41	PRKAR2B,CNN2,PRKACA,GNB1,PRKAR1A,PDE4D,PRKAR2A,GNB4,RGS2,CREB1,IL1B,GNG11,YWHAH,ADCY4,ARRB1,ARRB2,CALM2,ADM,PLCB3,RGS18,GNAQ,ETS2,CALM3,ATF3,PRKCD,YWHAZ,PRKCB,YWHAB,RGS14,FOS,GNB2,GNG5,JUN,RGS6,SLC8A1,PDE4B,SP1,GNG2,PLCG2,GRK6,GRK5
PID_TXA2PATHWAY	20/1792	56/13198	2.40994e-05	0.000284398	0.000175981	20	FGR,RHOA,ROCK1,PRKACA,GNB1,HCK,RAB11A,PIK3CG,MAPK14,GNAI2,GNA13,RAC1,ARRB2,PIK3R5,GNAQ,PRKCD,SYK,PRKCB,GNG2,LYN
WP_RAS_SIGNALING	46/1792	185/13198	2.47762e-05	0.000290863	0.000179981	46	RALBP1,GAB2,PIK3CB,RHOA,CDC42,PRKACA,GNB1,MAPK1,SOS2,STK4,MAPK3,SHOC2,RAB5C,GAB1,RAB5B,GNB4,RAP1A,TEK,GNG11,RAC2,RAF1,KRAS,RAC1,CALM2,RALB,RAB5A,PAK1,ETS2,CALM3,REL,PRKCB,MAP2K1,PIK3CD,RASGRP4,GNB2,RELA,GNG5,GRB2,PAK2,CSF1R,FOXO4,GNG2,NF1,PLCG2,RGL2,RASSF5
BIOCARTA_IL6_PATHWAY	11/1792	21/13198	2.66505e-05	0.000311245	0.000192593	11	MAPK3,JAK3,RAF1,IL6R,JAK1,STAT3,MAP2K1,FOS,CEBPB,JUN,GRB2
PID_AR_PATHWAY	21/1792	61/13198	2.88342e-05	0.000331595	0.000205185	21	FKBP4,PIAS1,CASP8,XRCC5,ZMIZ1,MAK,KDM3A,PTK2B,HIP1,NCOA2,CMTM2,TMF1,LATS2,NKX3-1,CTNNB1,CTDSP2,SVIL,NCOA6,CDK11B,PRKDC,NCOA4
REACTOME_NUCLEAR_EVENTS_KINASE_AND_TRANSCRIPTION_FACTOR_ACTIVATION_	21/1792	61/13198	2.88342e-05	0.000331595	0.000205185	21	DNM2,MAPK1,EP300,MAPK3,VRK3,DUSP3,CHD4,MAPK14,PPP2CA,MEF2D,RPS6KA1,CREB1,SGK1,FOSB,JUND,NAB1,DUSP6,MAPKAPK2,FOS,JUNB,TRIB1
REACTOME_CIRCADIAN_CLOCK	23/1792	70/13198	2.88343e-05	0.000331595	0.000205185	23	CREBBP,SMARCD3,NCOA1,CREM,EP300,HIF1A,TBL1X,NAMPT,NR3C1,MEF2D,CREB1,ARNTL,BHLHE40,NCOA2,NCOR1,CSNK1D,UBC,NFIL3,RBM4,TBL1XR1,RXRA,NCOA6,PPP1CB
REACTOME_TOLL_LIKE_RECEPTOR_10_TLR10_CASCADE	26/1792	84/13198	2.92201e-05	0.000334325	0.000206875	26	TAB2,MAP2K4,MAP3K1,MAPK1,MAPK3,RIPK2,VRK3,DUSP3,MAPK14,PPP2CA,MAPKAPK3,RPS6KA1,CREB1,DUSP6,PELI2,UBC,MAPKAPK2,S100A12,NOD2,MAP2K1,FOS,RELA,PELI3,JUN,TLR5,PELI1
PID_ERBB2_ERBB3_PATHWAY	17/1792	44/13198	3.02517e-05	0.00034265	0.000212026	17	PIK3CB,CDC42,PRKACA,MAPK1,MAPK3,RAF1,KRAS,RAC1,USP8,NRG1,STAT3,MAP2K1,FOS,PIK3CD,JUN,GRB2,RNF41
REACTOME_TBC_RABGAPS	17/1792	44/13198	3.02517e-05	0.00034265	0.000212026	17	GABARAPL2,RAB7A,TBC1D2,RAB11A,RAB5C,RAB5B,RAB35,TBC1D14,MAP1LC3B,RAB5A,TBC1D7,RABGEF1,RAB8B,RAB8A,TBC1D10B,GABARAP,RAB33B
KEGG_PROSTATE_CANCER	27/1792	89/13198	3.08653e-05	0.000347578	0.000215075	27	CREBBP,PIK3CB,HSP90AA1,GSK3B,HSP90AB1,MAPK1,EP300,SOS2,MAPK3,PIK3CG,CDKN1B,E2F3,CREB1,CDKN1A,RAF1,KRAS,MDM2,PIK3R5,CREB5,BRAF,TGFA,NKX3-1,CTNNB1,MAP2K1,PIK3CD,RELA,GRB2
BIOCARTA_P38MAPK_PATHWAY	15/1792	36/13198	3.09952e-05	0.000347578	0.000215075	15	MAP2K4,CDC42,MAP3K1,TGFB1,HSPB1,TGFBR1,RAPGEF2,MAPK14,CREB1,MAX,RAC1,MAPKAPK2,DDIT3,GRB2,MAP3K5
WP_PDGF_PATHWAY	16/1792	40/13198	3.11631e-05	0.000347731	0.00021517	16	MAP2K4,RHOA,CDC42,MAP3K1,MAPK1,MAPK3,RAF1,RAC1,VAV1,PAK1,JAK1,STAT3,MAP2K1,FOS,JUN,GRB2
REACTOME_EXTRA_NUCLEAR_ESTROGEN_SIGNALING	24/1792	75/13198	3.19007e-05	0.000354208	0.000219178	24	GNAI3,GNB1,HSP90AA1,MAPK1,MMP9,MAPK3,HSPB1,CDKN1B,HBEGF,GNAI2,GNB4,STRN,CREB1,FOXO3,EREG,GNG11,KRAS,ZDHHC7,TGFA,PTK2,FOS,GNB2,GNG5,GNG2
REACTOME_FOXO_MEDIATED_TRANSCRIPTION	22/1792	66/13198	3.3253e-05	0.000365621	0.00022624	22	NFYA,CREBBP,NFYC,EP300,CDKN1B,SOD2,NR3C1,BCL6,KAT2B,FOXO3,CAT,CDKN1A,BTG1,TXN,KLF4,SMAD4,PINK1,YWHAZ,YWHAB,DDIT3,FOXO4,TXNIP
WP_PATHWAYS_AFFECTED_IN_ADENOID_CYSTIC_CARCINOMA	22/1792	66/13198	3.3253e-05	0.000365621	0.00022624	22	CREBBP,ARID4B,KMT2C,SRCAP,KAT6A,BCORL1,ATRX,EP300,FOXO3,KANSL1,MAX,RAF1,KDM6B,NCOR1,KDM6A,NSD1,JMJD1C,SETD2,MORF4L1,MAML3,MYCBP,PRKDC
BIOCARTA_CARM1_PATHWAY	8/1792	12/13198	3.38414e-05	0.000370284	0.000229126	8	PRKAR2B,CREBBP,EP300,PRKAR1A,PRKAR2A,CREB1,RARA,RXRA
REACTOME_SIGNALING_BY_ERYTHROPOIETIN	12/1792	25/13198	3.53827e-05	0.000384941	0.000238195	12	PIK3CB,CRKL,PIK3CG,GAB1,KRAS,PIK3R5,VAV1,PIK3CD,STAT5B,GRB2,PLCG2,LYN
BIOCARTA_HIF_PATHWAY	9/1792	15/13198	3.55225e-05	0.000384941	0.000238195	9	HSP90AA1,EP300,HIF1A,VEGFA,CREB1,COPS5,LDHA,ARNT,JUN
KEGG_NOD_LIKE_RECEPTOR_SIGNALING_PATHWAY	21/1792	62/13198	3.80809e-05	0.00041069	0.000254128	21	TAB2,CASP8,HSP90AA1,NLRC4,HSP90AB1,MAPK1,MAPK3,MEFV,RIPK2,CARD8,MAPK14,TNFAIP3,IL1B,CARD6,CASP1,PSTPIP1,NLRP3,CXCL1,NOD2,RELA,NAIP
PID_ANGIOPOIETIN_RECEPTOR_PATHWAY	18/1792	49/13198	3.95064e-05	0.000422026	0.000261143	18	PXN,MAPK1,BMX,MAPK3,ELF2,MAPK14,TEK,ELF1,CDKN1A,RAC1,PAK1,ANGPT1,ITGA5,CRK,PTK2,RELA,STAT5B,GRB2
PID_FOXO_PATHWAY	18/1792	49/13198	3.95064e-05	0.000422026	0.000261143	18	CREBBP,EP300,ZFAND5,CDKN1B,SOD2,CSNK1A1,BCL6,KAT2B,SGK1,FOXO3,CAT,YWHAH,CSNK1D,RALB,YWHAZ,YWHAB,CTNNB1,FOXO4
WP_NUCLEOTIDEBINDING_OLIGOMERIZATION_DOMAIN_NOD_PATHWAY	16/1792	41/13198	4.47095e-05	0.000473152	0.000292779	16	CASP8,HSP90AA1,NLRC4,MEFV,RIPK2,CARD8,IL1B,CARD6,RAC1,CASP1,NLRP12,NLRP3,AIM2,NOD2,RELA,NAIP
PID_INTEGRIN_A4B1_PATHWAY	14/1792	33/13198	4.47123e-05	0.000473152	0.000292779	14	PRKACA,PXN,PRKAR1A,SPP1,PTK2B,RAC1,ABI1,TLN1,THBS1,JAML,YWHAZ,CRK,PTK2,CD14
BIOCARTA_IL2RB_PATHWAY	15/1792	37/13198	4.56231e-05	0.0004783	0.000295964	15	CFLAR,CRKL,MAPK1,MAPK3,JAK3,PIK3CG,CBL,NMI,RAF1,JAK1,SYK,FOS,STAT5B,GRB2,SOCS3
ST_P38_MAPK_PATHWAY	15/1792	37/13198	4.56231e-05	0.0004783	0.000295964	15	TAB2,MAP2K4,CDC42,MKNK2,MAPK1,HSPB1,MAPK14,IL1R1,CREB1,DUSP1,DUSP10,CREB5,MAPKAPK2,NR2C2,MAP3K5
BIOCARTA_CREB_PATHWAY	11/1792	22/13198	4.67686e-05	0.00048579	0.000300598	11	PRKAR2B,MAPK1,MAPK3,PRKAR1A,MAPK14,PRKAR2A,RPS6KA1,CREB1,RAC1,PRKCB,GRB2
REACTOME_REGULATION_OF_SIGNALING_BY_CBL	11/1792	22/13198	4.67686e-05	0.00048579	0.000300598	11	PIK3CB,CRKL,HCK,CBL,VAV1,UBC,SYK,CRK,PIK3CD,GRB2,LYN
REACTOME_SIGNALING_BY_PTK6	19/1792	54/13198	4.86109e-05	0.000502609	0.000311006	19	RHOA,PXN,HIF1A,CBL,CDKN1B,HBEGF,NR3C1,EPAS1,EREG,KRAS,RAC1,UBC,ELMO1,NRG1,CRK,STAT3,SOCS3,ARAP1,LRRK2
REACTOME_PARASITE_INFECTION	32/1792	116/13198	4.95558e-05	0.00051004	0.000315604	32	FGR,BTK,WAS,CDC42,MAPK1,MYH9,HCK,MAPK3,ARPC3,ACTR3,WIPF1,ARPC1B,WASF3,RAC1,ABI1,ACTR2,VAV1,ELMO1,WASF2,ARPC5,ARPC2,SYK,CRK,PTK2,WIPF2,BAIAP2,GRB2,MYO5A,FCGR3A,ARPC4,ARPC1A,LYN
WP_NOTCH_SIGNALING_PATHWAY_NETPATH	21/1792	63/13198	4.98905e-05	0.000511151	0.000316291	21	FHL1,SPEN,ITCH,PSEN1,GSK3B,EP300,HIF1A,JAG1,CDKN1A,NUMB,NOTCH2,CIR1,NCOR1,ADAM17,MAML1,NCSTN,HEY1,RBPJ,STAT3,MAML3,PSENEN
WP_HEPATITIS_C_AND_HEPATOCELLULAR_CARCINOMA	18/1792	50/13198	5.3963e-05	0.000550374	0.000340562	18	CD44,PTGS2,CTTN,HIF1A,MAPK3,TGFB1,TGFBR1,MAPK14,VEGFA,CDKN1A,RAC1,SMAD4,IL6R,JAK1,CXCR1,STAT3,JUN,GRB2
REACTOME_ANTIVIRAL_MECHANISM_BY_IFN_STIMULATED_GENES	25/1792	82/13198	5.47327e-05	0.000554479	0.000343102	25	EIF2AK2,EIF4G3,NUP50,MAPK3,DDX58,KPNB1,EIF4G2,NUP98,KPNA1,TRIM25,NUP214,OASL,RNASEL,EIF4E2,PPM1B,NUP58,UBC,UBE2L6,EIF4A2,MX1,JAK1,EIF4E3,ARIH1,MX2,KPNA4
WP_NUCLEAR_RECEPTORS_METAPATHWAY	69/1792	321/13198	5.48575e-05	0.000554479	0.000343102	69	SLC2A3,NAV3,PTGS2,HSP90AA1,NCOA1,FTL,HSP90AB1,GADD45B,HMOX1,EP300,TGFB1,AHR,ABCC3,PTGES3,CDKN1B,VDR,HBEGF,NR3C1,CPEB4,KAT2B,NFE2L2,RGS2,TNFAIP3,SRGN,NCOA3,IL1B,SEC14L1,FGF13,CDKN1C,JUND,SLC6A6,DNAJB1,ALOX5AP,BHLHE40,PRRG4,TXN,FGD4,NCOA2,ABHD2,PGD,ARNT,SLC39A1,NRG1,TSC22D3,G6PD,ACOX1,TGFA,TGFBR2,S100P,FTH1,STAT3,AKAP13,JUNB,SLC2A14,B3GNT5,JUN,THBD,GCC1,SERTAD2,PDE4B,SP1,RXRA,MAFG,SERPINA1,SERPINB2…
REACTOME_INTERLEUKIN_10_SIGNALING	17/1792	46/13198	5.89759e-05	0.000588411	0.000364098	17	TNFRSF1B,TNFRSF1A,PTGS2,TIMP1,CD86,IL1R2,IL1R1,CCR2,IL1B,IL1RN,JAK1,CXCL1,CCR1,STAT3,PTAFR,FPR1,IL10RB
SIG_BCR_SIGNALING_PATHWAY	17/1792	46/13198	5.89759e-05	0.000588411	0.000364098	17	BTK,PTPRC,GSK3B,MAPK1,SOS2,MAPK3,RAF1,FLOT2,FLOT1,PPP3CA,VAV1,SYK,INPP5D,PIK3CD,GRB2,PLCG2,LYN
BIOCARTA_CCR3_PATHWAY	10/1792	19/13198	5.95198e-05	0.000588411	0.000364098	10	RHOA,PPP1R12B,MAPK1,MAPK3,RAF1,ROCK2,GNAQ,PRKCB,MAP2K1,PLCB1
BIOCARTA_MAL_PATHWAY	10/1792	19/13198	5.95198e-05	0.000588411	0.000364098	10	RHOA,ROCK1,CDC42,MAP3K1,MAPK1,MAPK3,DIAPH1,RAF1,RAC1,MAP2K1
BIOCARTA_TGFB_PATHWAY	10/1792	19/13198	5.95198e-05	0.000588411	0.000364098	10	CREBBP,EP300,MAPK3,TGFB1,TGFBR1,APC,SKIL,SMAD4,TGFBR2,MAP2K1
PID_RETINOIC_ACID_PATHWAY	13/1792	30/13198	6.40619e-05	0.000630548	0.000390173	13	CREBBP,PRKACA,NCOA1,MAPK1,EP300,MAPK3,VDR,MAPK14,KAT2B,NCOA3,RARA,NCOA2,RXRA
WP_IL4_SIGNALING_PATHWAY	19/1792	55/13198	6.49058e-05	0.000636077	0.000393594	19	GAB2,MAPK1,EP300,MAPK3,JAK3,CBL,MAPK14,JAK1,NFIL3,STAT6,STAT3,INPP5D,FOS,PIK3CD,CEBPB,RELA,STAT5B,GRB2,SOCS3
REACTOME_SMOOTH_MUSCLE_CONTRACTION	15/1792	38/13198	6.59777e-05	0.000641198	0.000396763	15	VCL,MYLK,ITGB5,PXN,MYL6,MYL9,MYL12A,MYL12B,ANXA1,DYSF,TLN1,TPM3,PAK1,TPM4,PAK2
REACTOME_INTRA_GOLGI_AND_RETROGRADE_GOLGI_TO_ER_TRAFFIC	48/1792	203/13198	6.61433e-05	0.000641198	0.000396763	48	PAFAH1B1,CYTH3,VAMP3,KIF1B,CAPZB,KIF3C,RAB18,TUBB1,PLIN3,CYTH2,RIC1,MAN1A1,CAPZA1,COPA,TUBA1B,STX16,TUBA4A,KIF1C,DCTN4,ARF3,DYNC1LI2,STX6,RAB1A,ACTR1A,GALNT1,ARF1,DYNC1LI1,TMF1,VTI1A,TGOLN2,STX5,KIF27,TUBA1A,PAFAH1B2,ARF4,KIF5B,RAB33B,RAB1B,GCC1,TUBA8,COPB2,BICD2,TUBB4B,IGF2R,CAPZA2,ARFGAP3,CUX1,SEC22B
REACTOME_NEGATIVE_REGULATORS_OF_DDX58_IFIH1_SIGNALING	14/1792	34/13198	6.65663e-05	0.000641198	0.000396763	14	OTUD5,UBE2D1,ITCH,CYLD,MAVS,TAX1BP1,DDX58,UBE2D3,TNFAIP3,TRIM25,UBC,UBE2L6,TBK1,PCBP2
WP_P38_MAPK_SIGNALING_PATHWAY	14/1792	34/13198	6.65663e-05	0.000641198	0.000396763	14	MAP2K4,CDC42,MAP3K1,HSPB1,TGFBR1,MAPK14,MEF2D,CREB1,MAX,RAC1,MAPKAPK2,DDIT3,GRB2,MAP3K5
REACTOME_REGULATION_OF_FOXO_TRANSCRIPTIONAL_ACTIVITY_BY_ACETYLATION	7/1792	10/13198	6.9304e-05	0.000664728	0.000411323	7	CREBBP,EP300,KAT2B,FOXO3,TXN,FOXO4,TXNIP
BIOCARTA_CDMAC_PATHWAY	9/1792	16/13198	7.13986e-05	0.000670552	0.000414926	9	MAPK1,MAPK3,RAF1,PRKCB,MAP2K1,FOS,RELA,JUN,PLCB1
BIOCARTA_SPPA_PATHWAY	9/1792	16/13198	7.13986e-05	0.000670552	0.000414926	9	TBXAS1,PTGS1,MAPK1,MAPK3,RAF1,SYK,PRKCB,MAP2K1,PLCB1
PID_SMAD2_3PATHWAY	9/1792	16/13198	7.13986e-05	0.000670552	0.000414926	9	MAP3K1,MAPK1,PPM1A,MAPK3,KPNB1,NUP214,SMAD4,CTDSPL,CTDSP2
REACTOME_FOXO_MEDIATED_TRANSCRIPTION_OF_CELL_DEATH_GENES	9/1792	16/13198	7.13986e-05	0.000670552	0.000414926	9	NFYA,CREBBP,NFYC,EP300,BCL6,FOXO3,PINK1,DDIT3,FOXO4
REACTOME_TGF_BETA_RECEPTOR_SIGNALING_IN_EMT_EPITHELIAL_TO_MESENCHYMAL_TRANSITION_	9/1792	16/13198	7.13986e-05	0.000670552	0.000414926	9	RHOA,FKBP1A,PARD6A,TGFB1,TGFBR1,PARD3,UBC,F11R,TGFBR2
BIOCARTA_DREAM_PATHWAY	8/1792	13/13198	7.74811e-05	0.000724657	0.000448406	8	PRKAR2B,CREM,MAPK3,PRKAR1A,PRKAR2A,CREB1,FOS,JUN
BIOCARTA_GLEEVEC_PATHWAY	11/1792	23/13198	7.86662e-05	0.000732701	0.000453383	11	MAP2K4,MAP3K1,CRKL,MAPK3,PIK3CG,RAF1,MAP2K1,FOS,STAT5B,JUN,GRB2
PID_LKB1_PATHWAY	17/1792	47/13198	8.08097e-05	0.000746496	0.000461919	17	MARK4,PRKACA,MARK2,HSP90AA1,SMARCD3,GSK3B,CTSD,CREB1,YWHAH,PRKAA1,STK26,CAB39,SMAD4,SIK3,YWHAZ,YWHAB,SIK2
REACTOME_NR1H2_AND_NR1H3_MEDIATED_SIGNALING	17/1792	47/13198	8.08097e-05	0.000746496	0.000461919	17	MYLIP,NCOA1,AGO1,TNRC6B,EP300,TBL1X,KDM3A,EEPD1,AGO2,AGO3,NR1H2,AGO4,NCOR1,ABCG1,ABCA1,TBL1XR1,RXRA
REACTOME_RAB_GERANYLGERANYLATION	21/1792	65/13198	8.3698e-05	0.000770022	0.000476476	21	RAB27A,RAB7A,RAB21,RAB10,RAB18,RAB11A,RAB2A,RAB3D,RAB5C,RAB5B,RAB35,RAB32,RAB1A,RAB20,RAB5A,RAB8B,RAB8A,RAB31,RAB24,RAB33B,RAB1B
REACTOME_REGULATION_OF_LIPID_METABOLISM_BY_PPARALPHA	32/1792	119/13198	8.48448e-05	0.000775115	0.000479628	32	NFYA,CREBBP,THRAP3,NFYC,SMARCD3,NCOA1,EP300,TBL1X,MED25,AHR,MED13,HMGCR,MED13L,G0S2,NCOA3,NR1H2,ARNTL,GLIPR1,NCOA2,NCOR1,ARNT,ACSL1,CDK19,ACOX1,MED30,ABCA1,TBL1XR1,MED12,SP1,RXRA,MTF1,NCOA6
REACTOME_TRANSCRIPTIONAL_REGULATION_OF_WHITE_ADIPOCYTE_DIFFERENTIATION	25/1792	84/13198	8.49394e-05	0.000775115	0.000479628	25	CREBBP,THRAP3,ZNF638,SMARCD3,NCOA1,EP300,TBL1X,MED25,TGFB1,MED13,MED13L,NCOA3,KLF4,NCOA2,NCOR1,CDK19,MED30,CEBPB,RELA,TBL1XR1,ZNF467,MED12,RXRA,NCOA6,CEBPD
BIOCARTA_HIVNEF_PATHWAY	19/1792	56/13198	8.58604e-05	0.000780361	0.000482874	19	CFLAR,BID,TNFRSF1B,CASP8,TNFRSF1A,PSEN1,MAP3K1,ARHGDIB,LMNB1,APAF1,MDM2,LMNA,PRKCD,CRADD,RELA,PAK2,MAP3K5,CDK11B,PRKDC
REACTOME_RHO_GTPASE_CYCLE	36/1792	140/13198	8.72238e-05	0.000789568	0.000488571	36	RALBP1,ARHGAP6,RHOA,CDC42,RHOBTB1,SOS2,ARHGAP21,ARHGDIB,ECT2,ARHGEF2,GNA13,ARAP3,ARHGAP9,PREX1,RHOT1,RAC2,ARHGEF6,STARD8,ARHGEF11,RAC1,FAM13A,FGD4,VAV1,RHOB,ARHGAP26,ABR,ARHGAP25,TAGAP,ARHGEF40,AKAP13,RHOG,ARHGAP30,ARAP1,ITSN1,ARHGAP19,SRGAP2
REACTOME_PHOSPHOLIPID_METABOLISM	49/1792	211/13198	9.03883e-05	0.000814941	0.000504272	49	GDE1,AGPAT4,PNPLA6,PIK3CB,DGAT2,PIK3C3,PGS1,LPCAT2,OSBPL8,MTMR3,ABHD4,CDS2,LPIN2,BMX,PIK3CG,PITPNM1,LPCAT3,PIKFYVE,PLBD1,LPGAT1,MBOAT7,SLC44A2,SBF2,ARF3,GPAT3,MTMR6,PCTP,PIK3R5,ARF1,MBOAT2,RAB5A,LPCAT1,ABHD3,SYNJ1,PCYT1A,PLB1,INPPL1,MTMR10,INPP5D,PLEKHA2,AGPAT2,PIK3CD,MBOAT1,PHOSPHO1,RUFY1,DGAT1,AGPAT1,STARD10,PISD
PID_AP1_PATHWAY	22/1792	70/13198	9.11201e-05	0.000818266	0.000506329	22	FOSL2,EP300,HIF1A,MMP9,TIMP1,TGFB1,CDKN1B,NR3C1,CREB1,DUSP1,ELF1,COPS5,FOSB,JUND,ATF3,CTNNB1,FOS,JUNB,JUN,SP1,MAFG,HLA-A
PID_RET_PATHWAY	15/1792	39/13198	9.38541e-05	0.000839472	0.000519451	15	RHOA,PRKACA,PXN,MAPK1,MAPK3,GRB10,GAB1,RAP1A,CREB1,DOK4,RAC1,CRK,PTK2,JUN,GRB2
REACTOME_ONCOGENE_INDUCED_SENESCENCE	14/1792	35/13198	9.717e-05	0.000861816	0.000533277	14	AGO1,MAPK1,TNRC6B,MAPK3,ERF,E2F3,AGO3,CDKN2D,AGO4,MDM2,UBC,ETS2,SP1,TFDP1
KEGG_ENDOMETRIAL_CANCER	18/1792	52/13198	9.74992e-05	0.000861816	0.000533277	18	CTNNA1,PIK3CB,GSK3B,MAPK1,SOS2,MAPK3,PIK3CG,FOXO3,RAF1,KRAS,APC,PIK3R5,BRAF,ILK,CTNNB1,MAP2K1,PIK3CD,GRB2
REACTOME_APOPTOTIC_EXECUTION_PHASE	18/1792	52/13198	9.74992e-05	0.000861816	0.000533277	18	VIM,CASP8,ROCK1,ACIN1,BMX,STK24,KPNB1,LMNB1,KPNA1,TJP2,STK26,APC,LMNA,PRKCD,HMGB2,CTNNB1,PTK2,PAK2
REACTOME_G_ALPHA_12_13_SIGNALLING_EVENTS	24/1792	80/13198	0.000101738	0.000895773	0.000554289	24	BTK,RHOA,ROCK1,GNB1,SOS2,ECT2,GNB4,ARHGEF2,GNA13,PREX1,GNG11,ARHGEF6,ARHGEF11,ROCK2,FGD4,VAV1,RHOB,ABR,ARHGEF40,AKAP13,GNB2,GNG5,GNG2,ITSN1
BIOCARTA_ARENRF2_PATHWAY	10/1792	20/13198	0.000104574	0.000913604	0.000565323	10	MAPK1,HMOX1,MAPK14,NFE2L2,CREB1,POR,PRKCB,FOS,JUN,MAFG
REACTOME_INFLAMMASOMES	10/1792	20/13198	0.000104574	0.000913604	0.000565323	10	NLRC4,HSP90AB1,MEFV,TXN,CASP1,PSTPIP1,NLRP3,AIM2,RELA,TXNIP
WP_IL1_SIGNALING_PATHWAY	19/1792	57/13198	0.000112575	0.000979705	0.000606225	19	TAB2,MAP2K4,IRAK3,MAP3K1,MAPK1,MAPK3,MAPK14,IL1R1,IL1B,PELI2,MAPKAPK2,REL,MAP2K1,MAP3K2,RELA,JUN,IL1RAP,PELI1,MAP3K3
BIOCARTA_TCR_PATHWAY	16/1792	44/13198	0.000121079	0.00103117	0.000638071	16	MAP2K4,MAP3K1,MAPK3,PIK3CG,RAF1,RAC1,PPP3CA,VAV1,CALM2,CALM3,PRKCB,MAP2K1,FOS,RELA,JUN,GRB2
PID_CERAMIDE_PATHWAY	16/1792	44/13198	0.000121079	0.00103117	0.000638071	16	BID,EIF2AK2,CASP8,MAP2K4,TNFRSF1A,MAP4K4,MAP3K1,MAPK1,MAPK3,ASAH1,CTSD,RAF1,PRKCD,MAP2K1,CRADD,RELA
REACTOME_INTERLEUKIN_2_FAMILY_SIGNALING	16/1792	44/13198	0.000121079	0.00103117	0.000638071	16	GAB2,PIK3CB,CSF2RB,SOS2,JAK3,PTK2B,JAK1,SYK,INPPL1,STAT3,INPP5D,LGALS9,PIK3CD,STAT5B,GRB2,CSF2RA
WP_FAS_LIGAND_FASL_PATHWAY_AND_STRESS_INDUCTION_OF_HEAT_SHOCK_PROTEINS_HSP_REGULATION	16/1792	44/13198	0.000121079	0.00103117	0.000638071	16	CFLAR,CASP8,MAP2K4,MAP3K1,RIPK2,HSPB1,ARHGDIB,LMNB1,MAPKAPK3,APAF1,PAK1,LMNA,MAPKAPK2,JUN,PAK2,PRKDC
WP_NEURAL_CREST_CELL_MIGRATION_IN_CANCER	16/1792	44/13198	0.000121079	0.00103117	0.000638071	16	PIK3CB,RHOA,MMP9,PIK3CG,MMP8,KIDINS220,RAC1,PIK3R5,ARF1,PAK1,STAT3,FOS,PIK3CD,JUN,PAK2,EPHB4
REACTOME_PROGRAMMED_CELL_DEATH	43/1792	180/13198	0.000121234	0.00103117	0.000638071	43	CFLAR,BID,VIM,BAK1,DAPK2,CASP8,ROCK1,PSME1,MAPK1,ACIN1,BMX,STK24,MAPK3,CARD8,KPNB1,LMNB1,KPNA1,TJP2,APAF1,TNFRSF10B,TNFSF10,YWHAH,PSME3,STK26,APC,TLR4,UBC,LY96,LMNA,PRKCD,HMGB2,YWHAZ,YWHAB,CTNNB1,MLKL,STAT3,PTK2,CD14,PAK2,DAPK1,TFDP1,PSMB8,PSMB3
WP_ANGIOGENESIS	11/1792	24/13198	0.000127472	0.00108016	0.000668382	11	CREBBP,TIMP2,MAPK1,HIF1A,MMP9,MAPK14,VEGFA,TEK,ARNT,ANGPT1,PTK2
REACTOME_COPI_INDEPENDENT_GOLGI_TO_ER_RETROGRADE_TRAFFIC	18/1792	53/13198	0.0001291	0.00108985	0.000674382	18	PAFAH1B1,CAPZB,RAB18,TUBB1,CAPZA1,TUBA1B,TUBA4A,DCTN4,DYNC1LI2,ACTR1A,GALNT1,DYNC1LI1,TUBA1A,PAFAH1B2,TUBA8,BICD2,TUBB4B,CAPZA2
WP_G13_SIGNALING_PATHWAY	15/1792	40/13198	0.000131469	0.00109752	0.000679126	15	WAS,PIK3CB,RHOA,ROCK1,CDC42,ARHGDIB,GNA13,DIAPH1,ROCK2,RAC1,IQGAP1,CALM2,IQGAP2,PIK3CD,PPP1CB
WP_GLYCOGEN_SYNTHESIS_AND_DEGRADATION	15/1792	40/13198	0.000131469	0.00109752	0.000679126	15	PHKA2,PPP2R5A,PPP2R5B,PGM1,GSK3B,PYGL,PHKB,PPP2CA,GBE1,CALM2,HK1,CALM3,HK3,GYG1,PPP2R2A
WP_KISSPEPTINKISSPEPTIN_RECEPTOR_SYSTEM_IN_THE_OVARY	15/1792	40/13198	0.000131469	0.00109752	0.000679126	15	PIK3CB,MAPK1,MMP9,MAPK3,PIK3CG,RAF1,KRAS,ARRB1,ARRB2,PLCB3,PRKCD,PRKCB,MAP2K1,PIK3CD,PLCB1
BIOCARTA_ARAP_PATHWAY	9/1792	17/13198	0.000133446	0.00109776	0.000679276	9	CYTH3,ARFGEF1,CYTH2,COPA,ARF1,ASAP2,ASAP1,ARAP1,ARFGAP3
BIOCARTA_HCMV_PATHWAY	9/1792	17/13198	0.000133446	0.00109776	0.000679276	9	MAP3K1,MAPK1,MAPK3,PIK3CG,MAPK14,CREB1,MAP2K1,RELA,SP1
REACTOME_BETA_CATENIN_PHOSPHORYLATION_CASCADE	9/1792	17/13198	0.000133446	0.00109776	0.000679276	9	PPP2R5A,PPP2R5B,GSK3B,PPP2CA,CSNK1A1,APC,FRAT1,CTNNB1,FRAT2
WP_CORI_CYCLE	9/1792	17/13198	0.000133446	0.00109776	0.000679276	9	PGK1,GAPDH,TPI1,LDHA,ALDOA,HK1,G6PD,PGAM1,TALDO1
SIG_PIP3_SIGNALING_IN_B_LYMPHOCYTES	14/1792	36/13198	0.000139281	0.00113585	0.000702846	14	CYTH3,BTK,PTPRC,GAB1,RPS6KA1,FOXO3,PREX1,FLOT2,FLOT1,PIK3R5,VAV1,SYK,PLCG2,LYN
WP_TYPE_2_PAPILLARY_RENAL_CELL_CARCINOMA	14/1792	36/13198	0.000139281	0.00113585	0.000702846	14	CREBBP,TFE3,EP300,HIF1A,TGFB1,VEGFA,EPAS1,CDKN1A,DIAPH1,EGLN1,ARNT,TGFA,SETD2,EGLN2
BIOCARTA_PDGF_PATHWAY	12/1792	28/13198	0.000139588	0.00113585	0.000702846	12	MAP2K4,MAP3K1,MAPK3,PIK3CG,RAF1,JAK1,PRKCB,STAT3,MAP2K1,FOS,JUN,GRB2
REACTOME_RHO_GTPASES_ACTIVATE_IQGAPS	13/1792	32/13198	0.000142727	0.00115307	0.000713502	13	CTNNA1,CDC42,TUBB1,TUBA1B,TUBA4A,CLIP1,RAC1,IQGAP1,IQGAP2,TUBA1A,CTNNB1,TUBA8,TUBB4B
ST_ERK1_ERK2_MAPK_PATHWAY	13/1792	32/13198	0.000142727	0.00115307	0.000713502	13	KLF6,MKNK2,MAPK1,SOS2,MAPK3,RAP1A,RPS6KA1,CREB1,DUSP6,CREB5,BRAF,MAP2K1,GRB2
WP_REGULATION_OF_MICROTUBULE_CYTOSKELETON	17/1792	49/13198	0.000146599	0.00118012	0.000730241	17	ROCK1,CDC42,PRKACA,MARK2,GSK3B,MAPRE1,PARD6A,CLIP1,DIAPH1,APC,RAC1,PAK1,GNAQ,TAOK1,MAPKAPK2,STAT3,TPPP
KEGG_TOLL_LIKE_RECEPTOR_SIGNALING_PATHWAY	28/1792	102/13198	0.000156877	0.00125837	0.000778656	28	PIK3CB,TAB2,CASP8,MAP2K4,MAPK1,TLR8,MAPK3,PIK3CG,MAPK14,CD86,SPP1,IL1B,RAC1,TLR4,PIK3R5,IFNAR1,LY96,IFNAR2,MAP2K1,FOS,CD14,PIK3CD,RELA,TLR1,JUN,TBK1,TLR5,TLR9
KEGG_APOPTOSIS	25/1792	87/13198	0.000158315	0.0012654	0.000783007	25	CFLAR,PRKAR2B,CAPN1,BID,PIK3CB,CASP8,TNFRSF1A,PRKACA,IRAK3,CSF2RB,PIK3CG,PRKAR1A,PRKAR2A,IL1R1,APAF1,TNFRSF10B,TNFSF10,IL1B,PPP3CA,PIK3R5,PIK3CD,RELA,TNFRSF10C,CHP1,IL1RAP
PID_TCR_RAS_PATHWAY	8/1792	14/13198	0.00015924	0.0012677	0.000784432	8	MAPK1,MAPK3,RAF1,KRAS,BRAF,PRKCB,MAP2K1,FOS
PID_BCR_5PATHWAY	20/1792	63/13198	0.000160853	0.0012677	0.000784432	20	BTK,FCGR2B,PTPRC,MAP3K1,MAPK1,MAPK3,MAPK14,RAF1,RAC1,PPP3CA,BCL2A1,BCL10,SYK,MAP2K1,FOS,RELA,JUN,GRB2,PLCG2,LYN
PID_MYC_REPRESS_PATHWAY	20/1792	63/13198	0.000160853	0.0012677	0.000784432	20	NFYA,CFLAR,CSDE1,NFYC,SPI1,EP300,NDRG1,CDKN1B,CREB1,FOXO3,TJP2,CLU,CDKN1A,MAX,SMAD4,FTH1,DDIT3,SP1,ZFP36L1,CEBPD
WP_ENDOMETRIAL_CANCER	20/1792	63/13198	0.000160853	0.0012677	0.000784432	20	BAK1,CTNNA1,PIK3CB,GSK3B,GADD45B,MAPK1,SOS2,MAPK3,FOXO3,CDKN1A,RAF1,KRAS,APC,BRAF,ILK,CTNNB1,MAP2K1,FOS,PIK3CD,GRB2
PID_RHOA_PATHWAY	16/1792	45/13198	0.000164425	0.00129134	0.000799057	16	VCL,PPP1R12A,PKN2,MAP2K4,RHOA,ROCK1,CDC42,PARD6A,CDKN1B,DIAPH1,ROCK2,TLN1,MSN,FOS,JUN,LIMK2
PID_TGFBR_PATHWAY	18/1792	54/13198	0.000169344	0.00132535	0.000820106	18	ZFYVE16,TAB2,RHOA,ITCH,PPP1R15A,FKBP1A,PARD6A,TGFB1,TGFBR1,PPP2CA,SKIL,ARRB2,SMAD4,RNF111,TGFBR2,CTNNB1,GRB2,PPP2R2A
PID_P38_MK2_PATHWAY	10/1792	21/13198	0.000175414	0.0013587	0.000840742	10	HSPB1,MAPK14,MAPKAPK3,CREB1,YWHAH,LSP1,RAF1,MAPKAPK2,YWHAZ,YWHAB
PID_S1P_S1P1_PATHWAY	10/1792	21/13198	0.000175414	0.0013587	0.000840742	10	GNAI3,RHOA,PTGS2,MAPK1,MAPK3,VEGFA,GNAI2,GNAZ,RAC1,ITGB3
REACTOME_CD209_DC_SIGN_SIGNALING	10/1792	21/13198	0.000175414	0.0013587	0.000840742	10	CREBBP,PRKACA,ICAM3,EP300,RAF1,KRAS,PAK1,RELA,PAK2,LYN
WP_NEURAL_CREST_CELL_MIGRATION_DURING_DEVELOPMENT	15/1792	41/13198	0.000181522	0.0014012	0.000867039	15	PIK3CB,RHOA,MMP9,PIK3CG,MMP8,RAC1,PIK3R5,ARF1,PAK1,STAT3,FOS,PIK3CD,JUN,PAK2,EPHB4
KEGG_T_CELL_RECEPTOR_SIGNALING_PATHWAY	29/1792	108/13198	0.000183775	0.0014119	0.000873658	29	LCP2,PIK3CB,RHOA,CDC42,PTPRC,GSK3B,MAPK1,SOS2,MAPK3,NFAT5,PIK3CG,CBL,MAPK14,RAF1,KRAS,PPP3CA,PIK3R5,VAV1,BCL10,PAK1,CTLA4,MAP2K1,FOS,PIK3CD,RELA,JUN,GRB2,PAK2,CHP1
REACTOME_FLT3_SIGNALING	62/1792	292/13198	0.00018416	0.0014119	0.000873658	62	ITGA2B,GAB2,VCL,CUL3,PIK3CB,PPP2R5A,PPP2R5B,MARK3,APBB1IP,PIK3C3,PSME1,MAPK1,CSF2RB,HCK,MAPK3,JAK3,SHOC2,LAMTOR3,GAB1,RAPGEF2,VWF,DUSP16,HBEGF,PPP2CA,RAP1A,DUSP1,TEK,KBTBD7,EREG,PSME3,RAF1,KL,KRAS,TLN1,ARRB1,DUSP6,IQGAP1,ARRB2,DUSP10,GOLGA7,UBC,ANGPT1,PDE6D,NRG1,BRAF,DUSP2,JAK1,TGFA,YWHAB,MAP2K1,PTK2,RASGRP4,STAT5B,GRB2,NF1,CSF2RA,PSMB8,PPP1CB,RGL2,TLR9,ITGB3,PSMB3
REACTOME_INTERFERON_GAMMA_SIGNALING	26/1792	93/13198	0.000192862	0.0014736	0.000911837	26	CD44,IFNGR1,PIAS1,SP100,TRIM38,GBP1,TRIM25,IRF1,TRIM21,OASL,FCGR1A,IFNGR2,JAK1,GBP2,GBP4,PRKCD,B2M,IRF2,PTAFR,TRIM8,SOCS3,HLA-C,HLA-E,HLA-A,IFI30,HLA-B
REACTOME_SIGNALING_BY_EGFR	17/1792	50/13198	0.000194321	0.00147475	0.000912548	17	CDC42,PXN,GAB1,CBL,HBEGF,STAM2,EREG,EPS15L1,PTPN12,KRAS,STAM,ADAM10,SH3KBP1,UBC,ADAM17,TGFA,GRB2
WP_STRUCTURAL_PATHWAY_OF_INTERLEUKIN_1_IL1	17/1792	50/13198	0.000194321	0.00147475	0.000912548	17	TAB2,MAP2K4,MAP3K1,MKNK2,MAPK1,MAPK3,MAPK14,IL1R1,TANK,SAFB,MAPKAPK2,MAP2K1,FOS,RELA,IL1RAP,MBP,MAP3K3
WP_UNFOLDED_PROTEIN_RESPONSE	11/1792	25/13198	0.000199827	0.00151145	0.000935257	11	BID,HSPA5,CASP8,PPP1R15A,NFE2L2,ATF6,TNFRSF10B,IL1B,DDIT3,ERN1,TXNIP
REACTOME_SIGNALING_BY_NOTCH2	13/1792	33/13198	0.000206437	0.00155103	0.000959751	13	PSEN1,EP300,JAG1,MIB1,CREB1,NOTCH2,ADAM10,UBC,MAML1,NCSTN,RBPJ,MAML3,PSENEN
WP_REGUCALCIN_IN_PROXIMAL_TUBULE_EPITHELIAL_KIDNEY_CELLS	13/1792	33/13198	0.000206437	0.00155103	0.000959751	13	BAK1,CASP8,TNFRSF1A,MAPK1,TGFB1,TGFBR1,APAF1,RAF1,SMAD4,MCU,BRAF,RELA,MAP3K5
BIOCARTA_TNFR1_PATHWAY	12/1792	29/13198	0.000208877	0.00156415	0.000967867	12	CASP8,MAP2K4,TNFRSF1A,MAP3K1,ARHGDIB,LMNB1,PAK1,LMNA,CRADD,JUN,PAK2,PRKDC
WP_DNA_DAMAGE_RESPONSE_ONLY_ATM_DEPENDENT	30/1792	114/13198	0.000211539	0.00157884	0.000976959	30	BAK1,PIK3CB,RHOA,CDC42,PIK3C3,GSK3B,MAP3K1,MAPK1,SOS2,TGFB1,PIK3CG,CDKN1B,SOD2,BCL6,FOXO3,CAT,CDKN1A,RAC2,KRAS,APC,MDM2,RAC1,PIK3R5,SMAD4,FRAT1,CTNNB1,MLKL,PIK3CD,JUN,GRB2
PID_MTOR_4PATHWAY	21/1792	69/13198	0.000216664	0.00161175	0.000997326	21	RB1CC1,RRAGD,RHOA,PXN,MAPK1,POLDIP3,YY1,MAPK3,RPS6KA1,SGK1,YWHAH,CLIP1,RAF1,KRAS,RAC1,PDCD4,BRAF,RICTOR,YWHAZ,YWHAB,MAP2K1
WP_INTEGRINMEDIATED_CELL_ADHESION	28/1792	104/13198	0.000224453	0.00165874	0.0010264	28	ITGA2B,CAPN1,VCL,ROCK1,CDC42,ITGB5,PXN,MAPK1,RAP1A,VASP,RAC2,RAF1,ROCK2,RAC1,TLN1,GIT2,PAK1,BRAF,ITGB2,ITGA5,ILK,CRK,MAP2K1,PTK2,ITGAM,GRB2,PAK2,ITGB3
WP_TOLLLIKE_RECEPTOR_SIGNALING_PATHWAY	28/1792	104/13198	0.000224453	0.00165874	0.0010264	28	PIK3CB,TAB2,CASP8,MAP2K4,MAPK1,TLR8,MAPK3,PIK3CG,MAPK14,CD86,SPP1,IL1B,RAC1,TLR4,PIK3R5,IFNAR1,LY96,IFNAR2,MAP2K1,FOS,CD14,PIK3CD,RELA,TLR1,JUN,TBK1,TLR5,TLR9
REACTOME_ANTIGEN_PROCESSING_CROSS_PRESENTATION	27/1792	99/13198	0.000229299	0.00168902	0.00104513	27	BTK,VAMP3,CYBA,ITGB5,PSME1,SNAP23,NCF4,NCF2,PSME3,TLR4,FCGR1A,UBC,LY96,NCF1,CTSS,B2M,TAP1,CD14,TLR1,PSMB8,TAP2,HLA-C,HLA-E,HLA-A,HLA-B,SEC22B,PSMB3
PID_CMYB_PATHWAY	24/1792	84/13198	0.000233942	0.00170717	0.00105637	24	CREBBP,TAB2,SPI1,ATP2B1,PTGS2,LYZ,TOM1,EP300,TFEC,HSPA8,CDKN1B,COPA,CDKN1A,KRAS,PPP3CA,IQGAP1,NCOR1,ETS2,SKI,PPID,CEBPB,CSF1R,SP1,CEBPD
BIOCARTA_CALCINEURIN_PATHWAY	9/1792	18/13198	0.000234792	0.00170717	0.00105637	9	CDKN1A,PPP3CA,CALM2,GNAQ,CALM3,PRKCB,SP3,SP1,MARCKS
REACTOME_RORA_ACTIVATES_GENE_EXPRESSION	9/1792	18/13198	0.000234792	0.00170717	0.00105637	9	CREBBP,SMARCD3,NCOA1,EP300,TBL1X,NCOA2,TBL1XR1,RXRA,NCOA6
WP_INHIBITION_OF_EXOSOME_BIOGENESIS_AND_SECRETION_BY_MANUMYCIN_A_IN_CRPC_CELLS	9/1792	18/13198	0.000234792	0.00170717	0.00105637	9	RAB27A,MAPK1,MAPK3,RAB5C,RAB5B,RAF1,KRAS,RAB5A,BRAF
PID_TCPTP_PATHWAY	15/1792	42/13198	0.000247263	0.00179206	0.0011089	15	CREBBP,PIAS1,PIK3CB,EIF2AK2,JAK3,KPNB1,GAB1,VEGFA,JAK1,STAT6,STAT3,PIK3CD,STAT5B,GRB2,CSF1R
WP_PHOTODYNAMIC_THERAPYINDUCED_AP1_SURVIVAL_SIGNALING	17/1792	51/13198	0.000255026	0.0018424	0.00114004	17	CFLAR,BID,BAK1,MAP2K4,TNFRSF1A,BCL3,HSP90AA1,MAPK14,HBEGF,NFE2L2,TNFSF10,CDKN1A,MCL1,FOS,JUNB,JUN,MAP3K5
KEGG_GLIOMA	20/1792	65/13198	0.00025817	0.00185915	0.00115041	20	PIK3CB,MAPK1,SOS2,MAPK3,PIK3CG,E2F3,CDKN1A,RAF1,KRAS,MDM2,PIK3R5,CALM2,BRAF,CALM3,TGFA,PRKCB,MAP2K1,PIK3CD,GRB2,PLCG2
KEGG_LONG_TERM_POTENTIATION	21/1792	70/13198	0.000270469	0.00194152	0.00120138	21	CREBBP,PPP1R12A,PRKACA,MAPK1,EP300,MAPK3,RAP1A,RPS6KA1,RAF1,KRAS,PPP3CA,CALM2,PLCB3,GNAQ,BRAF,CALM3,PRKCB,MAP2K1,PLCB1,CHP1,PPP1CB
PID_ERBB4_PATHWAY	14/1792	38/13198	0.000272306	0.00194234	0.00120189	14	PIK3CB,TAB2,ITCH,MAPK1,MAPK3,HBEGF,EREG,MDM2,NCOR1,ADAM17,NRG1,PIK3CD,STAT5B,GRB2
REACTOME_APOPTOTIC_CLEAVAGE_OF_CELLULAR_PROTEINS	14/1792	38/13198	0.000272306	0.00194234	0.00120189	14	VIM,CASP8,ROCK1,ACIN1,BMX,STK24,LMNB1,TJP2,STK26,APC,LMNA,PRKCD,CTNNB1,PTK2
BIOCARTA_EICOSANOID_PATHWAY	10/1792	22/13198	0.000282618	0.0019956	0.00123484	10	ALOX5,TBXAS1,PTGS2,PTGS1,ALOX5AP,EPHX1,PTGES,CYSLTR2,CYSLTR1,PLCB1
BIOCARTA_IL2_PATHWAY	10/1792	22/13198	0.000282618	0.0019956	0.00123484	10	MAPK3,JAK3,RAF1,JAK1,SYK,MAP2K1,FOS,STAT5B,JUN,GRB2
BIOCARTA_RAS_PATHWAY	10/1792	22/13198	0.000282618	0.0019956	0.00123484	10	RALBP1,RHOA,CDC42,MAPK3,PIK3CG,RAF1,RAC1,MAP2K1,RELA,FOXO4
REACTOME_OPIOID_SIGNALLING	25/1792	90/13198	0.000283315	0.0019956	0.00123484	25	PRKAR2B,GNAI3,PDE4A,PRKACA,GNB1,MAPK1,PRKAR1A,CAMKK2,PDE4D,PPP2CA,PRKAR2A,GNAI2,GNB4,CREB1,GNG11,GNAZ,ADCY4,PPP3CA,PLCB3,PRKCD,GNB2,GNG5,PLCB1,PDE4B,GNG2
KEGG_NOTCH_SIGNALING_PATHWAY	16/1792	47/13198	0.000292847	0.00205632	0.00127241	16	CREBBP,PSEN1,EP300,JAG1,KAT2B,NUMB,NOTCH2,CIR1,ADAM17,MAML1,NCSTN,DTX3L,RBPJ,CTBP2,MAML3,PSENEN
REACTOME_GRB2_SOS_PROVIDES_LINKAGE_TO_MAPK_SIGNALING_FOR_INTEGRINS_	8/1792	15/13198	0.000300632	0.002085	0.00129016	8	ITGA2B,APBB1IP,VWF,RAP1A,TLN1,PTK2,GRB2,ITGB3
REACTOME_P130CAS_LINKAGE_TO_MAPK_SIGNALING_FOR_INTEGRINS	8/1792	15/13198	0.000300632	0.002085	0.00129016	8	ITGA2B,APBB1IP,VWF,RAP1A,TLN1,CRK,PTK2,ITGB3
REACTOME_THE_NLRP3_INFLAMMASOME	8/1792	15/13198	0.000300632	0.002085	0.00129016	8	HSP90AB1,MEFV,TXN,CASP1,PSTPIP1,NLRP3,RELA,TXNIP
SA_MMP_CYTOKINE_CONNECTION	8/1792	15/13198	0.000300632	0.002085	0.00129016	8	CD44,TNFRSF1B,TNFRSF1A,TGFB1,IL1B,IL6R,SELL,FCGR3A
BIOCARTA_FAS_PATHWAY	12/1792	30/13198	0.00030542	0.00211171	0.00130669	12	CFLAR,CASP8,MAP2K4,MAP3K1,RIPK2,ARHGDIB,LMNB1,PAK1,LMNA,JUN,PAK2,PRKDC
WP_INTEGRATED_BREAST_CANCER_PATHWAY	37/1792	154/13198	0.000310171	0.00213799	0.00132295	37	BID,BAK1,GRN,PIAS1,CASP8,CDC42,FOSL2,MAPK1,EP300,AHR,TGFBR1,ZMIZ1,VEGFA,HMGCR,RAP1A,CREB1,NCOA3,MAX,KRAS,ANXA1,USP15,MDM2,RAC1,NAB1,CSNK1D,SMAD4,PAK1,MAP3K7CL,BACH1,BRAF,JAK1,TGFBR2,CTNNB1,PLK3,JUN,SP1,NF1
REACTOME_RAB_REGULATION_OF_TRAFFICKING	31/1792	122/13198	0.000328912	0.00226027	0.00139862	31	GABARAPL2,RAB27A,RAB7A,RAB21,RAB10,TBC1D2,RAB18,RAB11A,RIC1,RAB5C,RAB5B,RAB35,RAB32,DENND1A,RAB3IP,TBC1D14,SBF2,RAB1A,MAP1LC3B,RAB5A,TBC1D7,RABGEF1,GAPVD1,RAB8B,RAB8A,RAB31,TBC1D10B,GABARAP,RAB33B,RAB1B,DENND5A
REACTOME_INTRACELLULAR_SIGNALING_BY_SECOND_MESSENGERS	63/1792	304/13198	0.000330987	0.00226761	0.00140316	63	PRKAR2B,RRAGD,PIK3CB,PPP2R5A,PPP2R5B,PRKACA,PHLPP1,GSK3B,RCOR1,PSME1,AGO1,MAPK1,TNRC6B,MAPK3,PRKAR1A,LAMTOR3,GAB1,CAMKK2,CDKN1B,CHD4,HBEGF,PPP2CA,CD86,PRKAR2A,STRN,CREB1,FOXO3,NR4A1,AGO2,CDKN1A,EREG,AGO3,RAC2,ADCY4,PSME3,KL,MKRN1,LAMTOR5,PHC2,AGO4,MDM2,RAC1,IER3,VAV1,GATAD2B,LAMTOR1,UBC,PIK3AP1,NRG1,TGFA,PRKCD,RICTOR,PIK3CD,RHOG,JUN,GRB2,FOXO4,LAMTOR4,IL1RAP,WWP2,PSMB8,TRIM27,PSMB3
WP_NONGENOMIC_ACTIONS_OF_125_DIHYDROXYVITAMIN_D3	21/1792	71/13198	0.000335634	0.00229248	0.00141855	21	TNFRSF1A,MAPK1,TLR8,MAPK3,VDR,MAPK14,KRAS,TLR4,PLCB3,JAK1,PRKCD,CAMP,PRKCB,NOD2,STAT2,SP3,JUN,PLCB1,SP1,RXRA,PLCG2
WP_HEAD_AND_NECK_SQUAMOUS_CELL_CARCINOMA	22/1792	76/13198	0.000342692	0.00233362	0.001444	22	CUL3,PIK3CB,CASP8,FKBP1A,PIK3CG,GAB1,VEGFA,NFE2L2,CDKN1A,SESN2,PRKAA1,KRAS,NUMB,NOTCH2,PIK3R5,SMAD4,MAML1,REL,TGFBR2,RICTOR,CTNNB1,RELA
REACTOME_CD28_DEPENDENT_VAV1_PATHWAY	7/1792	12/13198	0.000356213	0.00241112	0.00149196	7	CDC42,CD86,RAC1,VAV1,PAK1,GRB2,PAK2
WP_COMPUTATIONAL_MODEL_OF_AEROBIC_GLYCOLYSIS	7/1792	12/13198	0.000356213	0.00241112	0.00149196	7	PKM,PGK1,GAPDH,TPI1,LDHA,ALDOA,HK1
KEGG_ACUTE_MYELOID_LEUKEMIA	18/1792	57/13198	0.000362774	0.00244818	0.00151489	18	PIK3CB,SPI1,MAPK1,SOS2,PIM2,MAPK3,PIK3CG,RARA,RAF1,KRAS,PIK3R5,BRAF,STAT3,MAP2K1,PIK3CD,RELA,STAT5B,GRB2
WP_ARYL_HYDROCARBON_RECEPTOR_NETPATH	16/1792	48/13198	0.000384548	0.00258738	0.00160103	16	KLF6,PTGS2,HSP90AA1,MAPK1,EP300,AHR,CDKN1B,VEGFA,NFE2L2,CDKN1A,RAF1,KRAS,ARNT,MAP2K1,RELA,NF1
BIOCARTA_CXCR4_PATHWAY	9/1792	19/13198	0.000392537	0.00261769	0.00161978	9	MAPK1,MAPK3,PTK2B,RAF1,GNAQ,PRKCB,CRK,MAP2K1,RELA
BIOCARTA_ECM_PATHWAY	9/1792	19/13198	0.000392537	0.00261769	0.00161978	9	RHOA,ROCK1,MAPK1,MAPK3,PIK3CG,DIAPH1,RAF1,TLN1,MAP2K1
BIOCARTA_PAR1_PATHWAY	9/1792	19/13198	0.000392537	0.00261769	0.00161978	9	RHOA,ROCK1,PPP1R12B,PIK3CG,GNA13,PTK2B,GNAQ,PRKCB,PLCB1
REACTOME_TRANS_GOLGI_NETWORK_VESICLE_BUDDING	21/1792	72/13198	0.000414114	0.00274533	0.00169877	21	PICALM,DNM2,FTL,SNAP23,CTSZ,CPD,RAB5C,HSPA8,CHMP2A,AP3B1,BLOC1S1,GNS,ARRB1,CLTC,ARF1,TGOLN2,FTH1,GOLGB1,AP1S2,IGF2R,SNX2
REACTOME_TRANSLOCATION_OF_SLC2A4_GLUT4_TO_THE_PLASMA_MEMBRANE	21/1792	72/13198	0.000414114	0.00274533	0.00169877	21	TBC1D1,RAB10,SNAP23,MYH9,TUBB1,RAB11A,C2CD5,STXBP3,EXOC8,TUBA1B,TUBA4A,YWHAH,RAC1,YWHAZ,YWHAB,RAB8A,TUBA1A,TUBA8,TUBB4B,RALGAPA2,MYO5A
REACTOME_ACTIVATED_NOTCH1_TRANSMITS_SIGNAL_TO_THE_NUCLEUS	12/1792	31/13198	0.000437251	0.00283041	0.00175141	12	ITCH,PSEN1,JAG1,MIB1,NUMB,ARRB1,ADAM10,ARRB2,UBC,ADAM17,NCSTN,PSENEN
REACTOME_EGFR_DOWNREGULATION	12/1792	31/13198	0.000437251	0.00283041	0.00175141	12	CDC42,CBL,HBEGF,STAM2,EREG,EPS15L1,PTPN12,STAM,SH3KBP1,UBC,TGFA,GRB2
REACTOME_ENDOSOMAL_SORTING_COMPLEX_REQUIRED_FOR_TRANSPORT_ESCRT_	12/1792	31/13198	0.000437251	0.00283041	0.00175141	12	TSG101,CHMP5,STAM2,CHMP3,VPS4B,CHMP2A,STAM,VPS37B,UBC,VPS37A,UBAP1,VPS37C
REACTOME_MAPK_TARGETS_NUCLEAR_EVENTS_MEDIATED_BY_MAP_KINASES	12/1792	31/13198	0.000437251	0.00283041	0.00175141	12	MAPK1,MAPK3,VRK3,DUSP3,MAPK14,PPP2CA,RPS6KA1,CREB1,DUSP6,MAPKAPK2,FOS,JUN
BIOCARTA_IGF1R_PATHWAY	10/1792	23/13198	0.000439504	0.00283041	0.00175141	10	PRKAR2B,MAPK1,MAPK3,PRKAR1A,PRKAR2A,RPS6KA1,YWHAH,RAF1,MAP2K1,GRB2
BIOCARTA_NTHI_PATHWAY	10/1792	23/13198	0.000439504	0.00283041	0.00175141	10	CREBBP,EP300,TGFBR1,MAPK14,NR3C1,DUSP1,IL1B,SMAD4,TGFBR2,RELA
REACTOME_DOWNREGULATION_OF_SMAD2_3_SMAD4_TRANSCRIPTIONAL_ACTIVITY	10/1792	23/13198	0.000439504	0.00283041	0.00175141	10	UBE2D1,PPM1A,UBE2D3,USP9X,SKIL,NCOR1,SMAD4,UBC,RNF111,SKI
REACTOME_RAF_INDEPENDENT_MAPK1_3_ACTIVATION	10/1792	23/13198	0.000439504	0.00283041	0.00175141	10	MAPK1,MAPK3,DUSP16,DUSP1,DUSP6,DUSP10,DUSP2,IL6R,JAK1,MAP2K1
REACTOME_RESPONSE_OF_MTB_TO_PHAGOCYTOSIS	10/1792	23/13198	0.000439504	0.00283041	0.00175141	10	RAB7A,MAPK1,PGK1,MAPK3,KPNB1,DUSP16,KPNA1,RAB5A,UBC,TRIM27
WP_ESTROGEN_SIGNALING_PATHWAY	10/1792	23/13198	0.000439504	0.00283041	0.00175141	10	PRKACA,GNB1,MAPK1,MAPK14,CREB1,BRAF,MAP2K1,FOS,JUN,SP1
BIOCARTA_EGF_PATHWAY	11/1792	27/13198	0.000450671	0.00286953	0.00177561	11	MAP2K4,MAP3K1,MAPK3,RAF1,JAK1,PRKCB,STAT3,MAP2K1,FOS,JUN,GRB2
REACTOME_BMAL1_CLOCK_NPAS2_ACTIVATES_CIRCADIAN_GENE_EXPRESSION	11/1792	27/13198	0.000450671	0.00286953	0.00177561	11	CREBBP,SMARCD3,NCOA1,TBL1X,NAMPT,ARNTL,BHLHE40,NCOA2,TBL1XR1,RXRA,NCOA6
REACTOME_INFECTION_WITH_MYCOBACTERIUM_TUBERCULOSIS	11/1792	27/13198	0.000450671	0.00286953	0.00177561	11	RAB7A,MAPK1,PGK1,MAPK3,KPNB1,DUSP16,KPNA1,RAB5A,UBC,B2M,TRIM27
WP_INTRACELLULAR_TRAFFICKING_PROTEINS_INVOLVED_IN_CMT_NEUROPATHY	11/1792	27/13198	0.000450671	0.00286953	0.00177561	11	KIF1B,RAB7A,DNM2,RAB11A,NDRG1,HSPB1,SBF2,FGD4,MPZ,SH3TC2,LITAF
REACTOME_SIGNALING_BY_NOTCH1_PEST_DOMAIN_MUTANTS_IN_CANCER	18/1792	58/13198	0.000460164	0.00292172	0.00180791	18	CREBBP,PSEN1,EP300,JAG1,MIB1,TBL1X,KAT2B,ADAM10,NCOR1,UBC,ADAM17,MAML1,NCSTN,HEY1,RBPJ,TBL1XR1,MAML3,PSENEN
REACTOME_SIGNALING_BY_NOTCH3	16/1792	49/13198	0.000499918	0.00315634	0.00195309	16	CREBBP,PSEN1,EP300,JAG1,MIB1,KAT2B,ADAM10,UBC,MAML1,NCSTN,HEY1,RBPJ,PBX1,MAML3,WWP2,PSENEN
WP_EXERCISEINDUCED_CIRCADIAN_REGULATION	16/1792	49/13198	0.000499918	0.00315634	0.00195309	16	TAB2,ZFR,DNAJA1,VAPA,HSPA8,EIF4G2,QKI,G0S2,BTG1,ARNTL,ETV6,TOB1,CEBPB,DAZAP2,CLDN5,NCOA4
WP_FERROPTOSIS	14/1792	40/13198	0.000501886	0.00315992	0.0019553	14	ACSL4,FTL,HMOX1,LPCAT3,ACSL3,SAT1,SLC40A1,MAP1LC3B,ACSL1,FTH1,PCBP1,PCBP2,ATG7,NCOA4
WP_SIGNALING_PATHWAYS_IN_GLIOBLASTOMA	23/1792	83/13198	0.00050699	0.00318316	0.00196969	23	PIK3CB,MAP2K4,MAPK1,EP300,MAPK3,PIK3CG,GAB1,CBL,CDKN1B,FOXO3,CDKN1A,RAF1,KRAS,MDM2,BRAF,PRKCD,PRKCB,MAP2K1,PIK3CD,GRB2,FOXO4,NF1,PLCG2
BIOCARTA_IL7_PATHWAY	8/1792	16/13198	0.000529866	0.00330836	0.00204716	8	CREBBP,EP300,JAK3,PIK3CG,PTK2B,NMI,JAK1,STAT5B
WP_MAPK_PATHWAY_IN_CONGENITAL_THYROID_CANCER	8/1792	16/13198	0.000529866	0.00330836	0.00204716	8	SOS2,MAPK3,RAF1,KRAS,BRAF,MAP2K1,FOS,JUN
REACTOME_ROS_AND_RNS_PRODUCTION_IN_PHAGOCYTES	13/1792	36/13198	0.000561067	0.00348387	0.00215576	13	ATP6V0A1,CYBA,NCF4,ATP6V1D,ATP6V0E1,ATP6V1A,NCF2,ATP6V0B,RAC2,ATP6V1E1,ATP6V1B2,NCF1,ATP6V0D1
WP_OVERVIEW_OF_LEUKOCYTEINTRINSIC_HIPPO_PATHWAY_FUNCTIONS	13/1792	36/13198	0.000561067	0.00348387	0.00215576	13	VMP1,RHOA,NDRG1,MAPK14,MOB1A,RAP1A,FOXO3,KNSTRN,RAC1,LATS2,FOXO4,STK38L,RASSF5
WP_ADIPOGENESIS	32/1792	131/13198	0.000563768	0.00349103	0.00216019	32	KLF6,NCOA1,GADD45B,OSM,HIF1A,LPIN2,TGFB1,NAMPT,AHR,NR3C1,EPAS1,MEF2D,CREB1,KLF7,CDKN1A,RARA,NCOA2,NCOR1,CELF1,LMNA,STAT6,CTNNB1,STAT3,AGPAT2,STAT2,CEBPB,STAT5B,DDIT3,SOCS3,SP1,RXRA,CEBPD
PID_ATF2_PATHWAY	18/1792	59/13198	0.000579336	0.0035776	0.00221376	18	CUL3,MAPK1,EP300,MAPK3,MAPK14,CREB1,ARG1,DUSP1,JUND,JDP2,DUSP10,ATF3,FOS,JUNB,DDIT3,JUN,SOCS3,NF1
WP_EGFR_TYROSINE_KINASE_INHIBITOR_RESISTANCE	23/1792	84/13198	0.000609943	0.00374021	0.00231438	23	PIK3CB,GSK3B,MAPK1,SOS2,MAPK3,GAB1,VEGFA,FOXO3,RAF1,KRAS,EIF4E2,NRG1,BRAF,IL6R,JAK1,TGFA,PRKCB,STAT3,MAP2K1,PIK3CD,GRB2,NF1,PLCG2
PID_ALPHA_SYNUCLEIN_PATHWAY	12/1792	32/13198	0.000613965	0.00374021	0.00231438	12	FGR,FKBP1A,MAPK1,HCK,MAPK3,PTK2B,TOR1A,PRKCD,SYK,UBE2L3,GRK5,LYN
PID_NETRIN_PATHWAY	12/1792	32/13198	0.000613965	0.00374021	0.00231438	12	RHOA,CDC42,MAPK1,MAPK3,AGAP2,RAC1,PAK1,ELMO1,MAP2K1,PTK2,PITPNA,DAPK1
REACTOME_TGF_BETA_RECEPTOR_SIGNALING_ACTIVATES_SMADS	12/1792	32/13198	0.000613965	0.00374021	0.00231438	12	PPP1R15A,FKBP1A,TGFB1,TGFBR1,CBL,UBE2M,USP15,FURIN,SMAD4,UBC,TGFBR2,PPP1CB
REACTOME_THROMBIN_SIGNALLING_THROUGH_PROTEINASE_ACTIVATED_RECEPTORS_PARS_	12/1792	32/13198	0.000613965	0.00374021	0.00231438	12	GNB1,MAPK1,MAPK3,GNB4,GNA13,GNG11,ARRB1,ARRB2,GNAQ,GNB2,GNG5,GNG2
WP_REGULATORY_CIRCUITS_OF_THE_STAT3_SIGNALING_PATHWAY	22/1792	79/13198	0.000617923	0.00375417	0.00232302	22	CREBBP,IFNGR1,PTPRC,IL12RB2,MAPK1,CSF2RB,MAPK3,JAK3,MAPK14,IFNAR1,SETD7,DUSP2,IFNAR2,IFNGR2,IL6R,JAK1,RICTOR,PRKCB,STAT3,SOCS3,CSF2RA,IL10RB
PID_AVB3_INTEGRIN_PATHWAY	21/1792	74/13198	0.000620124	0.00375742	0.00232503	21	VCL,CASP8,RHOA,ROCK1,HSP90AA1,PXN,MAPK1,MAPK3,CBL,CDKN1B,VEGFA,SPP1,PTK2B,RAC1,TLN1,F11R,TGFBR2,ILK,PTK2,CSF1R,ITGB3
BIOCARTA_NKCELLS_PATHWAY	9/1792	20/13198	0.000628144	0.00378566	0.0023425	9	MAPK3,PTK2B,RAC1,VAV1,PAK1,SYK,B2M,MAP2K1,HLA-A
REACTOME_G_BETA_GAMMA_SIGNALLING_THROUGH_CDC42	9/1792	20/13198	0.000628144	0.00378566	0.0023425	9	CDC42,GNB1,GNB4,GNG11,ARHGEF6,PAK1,GNB2,GNG5,GNG2
REACTOME_CARGO_RECOGNITION_FOR_CLATHRIN_MEDIATED_ENDOCYTOSIS	27/1792	105/13198	0.000635396	0.00381915	0.00236323	27	VAMP3,PICALM,CBL,HBEGF,STAM2,COPS5,EREG,EPS15L1,STAM,TOR1B,TOR1A,ARRB1,STON2,CLTC,ARRB2,SH3KBP1,UBC,TGOLN2,FCHO2,AP2M1,TGFA,REPS2,GRB2,UBQLN2,IGF2R,ITSN2,ITSN1
PID_TRAIL_PATHWAY	11/1792	28/13198	0.00065196	0.00389792	0.00241197	11	CFLAR,PIK3CB,CASP8,MAP2K4,MAP3K1,MAPK1,MAPK3,TNFRSF10B,TNFSF10,PIK3CD,TNFRSF10C
ST_GRANULE_CELL_SURVIVAL_PATHWAY	11/1792	28/13198	0.00065196	0.00389792	0.00241197	11	MAP2K4,MAPK1,ASAH1,CREB1,APC,CREB5,GNAQ,CAMP,FOS,JUN,CXCR2
BIOCARTA_TPO_PATHWAY	10/1792	24/13198	0.000662384	0.00392898	0.00243119	10	MAPK3,PIK3CG,RAF1,PRKCB,STAT3,MAP2K1,FOS,STAT5B,JUN,GRB2
REACTOME_ESTROGEN_DEPENDENT_NUCLEAR_EVENTS_DOWNSTREAM_OF_ESR_MEMBRANE_SIGNALING	10/1792	24/13198	0.000662384	0.00392898	0.00243119	10	MAPK1,MAPK3,CDKN1B,HBEGF,CREB1,FOXO3,EREG,TGFA,PTK2,FOS
REACTOME_PURINERGIC_SIGNALING_IN_LEISHMANIASIS_INFECTION	10/1792	24/13198	0.000662384	0.00392898	0.00243119	10	HSP90AB1,MEFV,IL1B,TXN,CASP1,ENTPD1,PSTPIP1,NLRP3,RELA,TXNIP
PID_AMB2_NEUTROPHILS_PATHWAY	14/1792	41/13198	0.000668	0.0039519	0.00244537	14	FGR,PLAUR,RHOA,ROCK1,MMP9,HCK,SELPLG,RAP1A,LRP1,TLN1,ITGB2,ITGAM,SELP,LYN
BIOCARTA_RAB_PATHWAY	7/1792	13/13198	0.0006814	0.00401012	0.00248139	7	RAB27A,RAB7A,RAB11A,RAB2A,RAB1A,RAB5A,RAB8A
WP_OSTEOPONTIN_SIGNALING	7/1792	13/13198	0.0006814	0.00401012	0.00248139	7	MAPK1,MMP9,MAPK3,SPP1,MAP2K1,RELA,ITGB3
WP_RANKLRANK_RECEPTOR_ACTIVATOR_OF_NFKB_LIGAND_SIGNALING_PATHWAY	17/1792	55/13198	0.000691166	0.004057	0.0025104	17	GAB2,TAB2,SPI1,CDC42,MAPK1,MAPK3,CBL,MAPK14,RAC1,SYK,MAP2K1,PTK2,FOS,RELA,JUN,PAPSS2,LYN
PID_PS1_PATHWAY	15/1792	46/13198	0.000754908	0.00441964	0.0027348	15	CREBBP,PSEN1,GSK3B,MAPK1,MAPK3,CSNK1A1,APC,ADAM10,NCSTN,FRAT1,CTNNB1,RBPJ,FOS,JUN,PSENEN
REACTOME_CELLULAR_RESPONSE_TO_HEAT_STRESS	26/1792	101/13198	0.000779598	0.00455237	0.00281693	26	FKBP4,CREBBP,HSPA5,HSP90AA1,GSK3B,NUP50,HSP90AB1,MAPK1,EP300,MAPK3,DNAJB6,HSPB1,HSPA8,NUP98,PTGES3,HSPH1,NUP214,DNAJB1,NUP58,DEDD2,MAPKAPK2,VCP,HSPA6,HSPA1B,HSPA1A,HSBP1
REACTOME_COHESIN_LOADING_ONTO_CHROMATIN	6/1792	10/13198	0.000799288	0.00465528	0.00288061	6	WAPL,PDS5B,STAG2,STAG1,NIPBL,RAD21
WP_G_PROTEIN_SIGNALING_PATHWAYS	25/1792	96/13198	0.000813187	0.00472403	0.00292315	25	PRKAR2B,GNAI3,PDE4A,RHOA,PRKACA,GNB1,PRKAR1A,PDE4D,PRKAR2A,GNAI2,GNA13,GNG11,GNAZ,ADCY4,KRAS,PPP3CA,CALM2,PLCB3,GNAQ,PRKCD,PRKCB,AKAP13,GNB2,GNG5,PDE4B
BIOCARTA_NFAT_PATHWAY	16/1792	51/13198	0.00082142	0.00474739	0.0029376	16	PRKAR2B,CREBBP,GSK3B,MAPK1,MAPK3,PIK3CG,PRKAR1A,MAPK14,HBEGF,CSNK1A1,PRKAR2A,RAF1,PPP3CA,CALM2,CALM3,MAP2K1
PID_PTP1B_PATHWAY	16/1792	51/13198	0.00082142	0.00474739	0.0029376	16	FGR,ITGA2B,CAPN1,RHOA,HCK,TXN,FCGR2A,CRK,STAT3,CDH2,STAT5B,GRB2,CSF1R,SOCS3,LYN,ITGB3
BIOCARTA_AGR_PATHWAY	12/1792	33/13198	0.000846838	0.00485693	0.00300538	12	CDC42,CTTN,MAPK1,MAPK3,ARHGEF6,RAC1,GIT2,PAK1,NRG1,JUN,PAK2,SP1
PID_EPO_PATHWAY	12/1792	33/13198	0.000846838	0.00485693	0.00300538	12	BTK,CRKL,GAB1,CBL,SH2B3,MAPK14,RAP1A,STAT5B,GRB2,SOCS3,PLCG2,LYN
REACTOME_GLUCAGON_SIGNALING_IN_METABOLIC_REGULATION	12/1792	33/13198	0.000846838	0.00485693	0.00300538	12	PRKAR2B,PRKACA,GNB1,PRKAR1A,PRKAR2A,GNB4,GNG11,ADCY4,CYSLTR2,GNB2,GNG5,GNG2
REACTOME_GOLGI_TO_ER_RETROGRADE_TRANSPORT	32/1792	134/13198	0.000854761	0.00488993	0.0030258	32	PAFAH1B1,KIF1B,CAPZB,KIF3C,RAB18,TUBB1,CAPZA1,COPA,TUBA1B,TUBA4A,KIF1C,DCTN4,ARF3,DYNC1LI2,RAB1A,ACTR1A,GALNT1,ARF1,DYNC1LI1,KIF27,TUBA1A,PAFAH1B2,ARF4,KIF5B,RAB1B,TUBA8,COPB2,BICD2,TUBB4B,CAPZA2,ARFGAP3,SEC22B
REACTOME_GOLGI_ASSOCIATED_VESICLE_BIOGENESIS	17/1792	56/13198	0.000868751	0.00495738	0.00306754	17	PICALM,DNM2,FTL,CPD,RAB5C,HSPA8,AP3B1,BLOC1S1,ARRB1,CLTC,ARF1,TGOLN2,FTH1,GOLGB1,AP1S2,IGF2R,SNX2
REACTOME_CLASS_I_MHC_MEDIATED_ANTIGEN_PROCESSING_PRESENTATION	72/1792	370/13198	0.000876076	0.00497167	0.00307638	72	MYLIP,BTK,UBR2,RNF19A,CUL3,HSPA5,VAMP3,CYBA,UBE2D1,UBE2A,ITCH,ITGB5,PSME1,SNAP23,NCF4,SEC23A,UBE2W,UBE2R2,UBE2D3,KLHL2,RNF130,RNF19B,NCF2,FBXL5,UBE2B,AREL1,KBTBD7,RNF114,UBE2M,UBA1,RLIM,PSME3,TRIM21,MKRN1,TLR4,FBXO11,HECW2,NPEPPS,HERC4,FCGR1A,SEC24D,UBC,TRIP12,LY96,UBE2L6,RNF111,NCF1,FBXL13,CTSS,DTX3L,B2M,TAP1,CD14,TLR1,CDC26,RNF41,ASB7,SOCS3,UBE2L3,TRIM69,UBE2H,SIAH1,ATG7,PJA2,PSMB8,TAP2,HLA-C,H…
KEGG_BLADDER_CANCER	14/1792	42/13198	0.000878369	0.00497167	0.00307638	14	DAPK2,MAPK1,MMP9,MAPK3,E2F3,VEGFA,CDKN1A,RAF1,KRAS,MDM2,THBS1,BRAF,MAP2K1,DAPK1
BIOCARTA_BARRESTIN_SRC_PATHWAY	8/1792	17/13198	0.000882239	0.00497167	0.00307638	8	FGR,MAPK1,HCK,MAPK3,RAF1,ARRB1,MAP2K1,PLCB1
BIOCARTA_CCR5_PATHWAY	8/1792	17/13198	0.000882239	0.00497167	0.00307638	8	MAPK14,PTK2B,CALM2,GNAQ,CALM3,PRKCB,FOS,JUN
WP_FOCAL_ADHESIONPI3KAKTMTORSIGNALING_PATHWAY	62/1792	309/13198	0.000882284	0.00497167	0.00307638	62	ITGA2B,PIK3CB,SLC2A3,TBC1D1,PPP2R5A,PPP2R5B,GNB1,HSP90AA1,PHLPP1,GSK3B,ITGB5,RAB10,PPP2R3C,HSP90AB1,OSM,MAPK1,HIF1A,MAPK3,RAB2A,JAK3,PIK3CG,VWF,CDKN1B,VEGFA,PPP2CA,PFKFB4,GNB4,EPAS1,CREB1,FOXO3,SPP1,TEK,CDKN1A,GNG11,FGF13,RAF1,PRKAA1,KRAS,MDM2,EIF4E2,CAB39,THBS1,PIK3R5,IFNAR1,CREB5,ANGPT1,IFNAR2,ITGB2,IL6R,ITGA5,JAK1,RAB8A,MAP2K1,PTK2,PFKFB3,PIK3CD,GNB2,GNG5,GRB2,CSF1R,GNG2,ITGB3
WP_IL18_SIGNALING_PATHWAY	57/1792	279/13198	0.000892639	0.00501748	0.00310473	57	CFLAR,ITGA2B,BID,PHF20,GRN,FOXN3,CASP8,TNFRSF1A,PTGS2,GSK3B,MAPK1,HMOX1,MMP9,TIMP1,MAPK3,HSPB1,VEGFA,IL18R1,IL18RAP,NCF2,MMP8,TNFAIP3,ARG1,SPP1,NR4A1,LRRFIP1,IRF1,IL1B,S1PR4,PRKAA1,UGGT1,IER3,ANP32A,HDGF,NFKBIZ,ZDHHC7,NCF1,EPB41,BTG2,CXCL16,ATF3,REL,PRKCD,ZNF143,PRKCB,B2M,CTNNB1,FOS,CEBPB,RELA,JUN,HCAR2,SOCS3,SP1,STK40,ABHD16A,TMSB4X
PID_TRKR_PATHWAY	18/1792	61/13198	0.00089891	0.00504016	0.00311876	18	GAB2,RHOA,CDC42,CRKL,MAPK1,MAPK3,GAB1,RAP1A,KRAS,RAC1,RIT1,DYNLT1,ELMO1,CRK,STAT3,MAP2K1,RHOG,GRB2
REACTOME_INTERLEUKIN_17_SIGNALING	20/1792	71/13198	0.000917018	0.00512276	0.00316988	20	TAB2,MAP2K4,MAPK1,MAPK3,RIPK2,VRK3,DUSP3,MAPK14,PPP2CA,MAPKAPK3,RPS6KA1,CREB1,DUSP6,UBC,MAPKAPK2,NOD2,MAP2K1,FOS,JUN,IL17RA
BIOCARTA_BIOPEPTIDES_PATHWAY	11/1792	29/13198	0.000922733	0.00512276	0.00316988	11	MAPK1,MAPK3,MAPK14,PTK2B,RAF1,CALM2,CALM3,PRKCB,STAT3,MAP2K1,GRB2
PID_S1P_S1P3_PATHWAY	11/1792	29/13198	0.000922733	0.00512276	0.00316988	11	GNAI3,RHOA,MAPK1,MAPK3,VEGFA,GNAI2,GNA13,GNAZ,RAC1,GNAQ,ITGB3
REACTOME_DAP12_SIGNALING	11/1792	29/13198	0.000922733	0.00512276	0.00316988	11	BTK,TYROBP,LCP2,PIK3CB,KRAS,RAC1,SYK,B2M,GRB2,PLCG2,HLA-E
BIOCARTA_CERAMIDE_PATHWAY	9/1792	21/13198	0.000967691	0.00530208	0.00328083	9	CASP8,MAP2K4,TNFRSF1A,MAP3K1,MAPK1,MAPK3,RAF1,MAP2K1,RELA
BIOCARTA_RHO_PATHWAY	9/1792	21/13198	0.000967691	0.00530208	0.00328083	9	VCL,ARHGAP6,RHOA,ROCK1,PPP1R12B,DIAPH1,ARHGEF11,TLN1,BAIAP2
REACTOME_ANTIGEN_PRESENTATION_FOLDING_ASSEMBLY_AND_PEPTIDE_LOADING_OF_CLASS_I_MHC	10/1792	25/13198	0.000970755	0.00530208	0.00328083	10	HSPA5,SEC23A,SEC24D,B2M,TAP1,TAP2,HLA-C,HLA-E,HLA-A,HLA-B
WP_HYPOTHESIZED_PATHWAYS_IN_PATHOGENESIS_OF_CARDIOVASCULAR_DISEASE	10/1792	25/13198	0.000970755	0.00530208	0.00328083	10	LTBP1,MAPK1,MAPK3,TGFBR1,ENG,MAPK14,FBN2,SMAD4,TGFBR2,NR2C2
WP_IL7_SIGNALING_PATHWAY	10/1792	25/13198	0.000970755	0.00530208	0.00328083	10	GSK3B,MAPK1,MAPK3,JAK3,CDKN1B,PTK2B,JAK1,STAT3,MAP2K1,STAT5B
WP_PHYSIOLOGICAL_AND_PATHOLOGICAL_HYPERTROPHY_OF_THE_HEART	10/1792	25/13198	0.000970755	0.00530208	0.00328083	10	RHOA,MAPK1,MAPK14,RAC1,PPP3CA,CALM2,PRKCB,STAT3,FOS,JUN
REACTOME_INTERLEUKIN_12_SIGNALING	15/1792	47/13198	0.000971498	0.00530208	0.00328083	15	CNN2,CDC42,IL12RB2,SOD2,LMNB1,CAPZA1,LCP1,ARF1,MSN,PDCD4,JAK1,PITPNA,TALDO1,PAK2,SERPINB2
PID_P38_ALPHA_BETA_DOWNSTREAM_PATHWAY	13/1792	38/13198	0.00101155	0.00549289	0.0033989	13	PTGS2,HBP1,HSPB1,MAPK14,MAPKAPK3,ATF6,CREB1,RAB5A,USF1,MAPKAPK2,CEBPB,DDIT3,JUN
REACTOME_GENE_AND_PROTEIN_EXPRESSION_BY_JAK_STAT_SIGNALING_AFTER_INTERLEUKIN_12_STIMULATION	13/1792	38/13198	0.00101155	0.00549289	0.0033989	13	CNN2,CDC42,SOD2,LMNB1,CAPZA1,LCP1,ARF1,MSN,PDCD4,PITPNA,TALDO1,PAK2,SERPINB2
WP_CALCIUM_REGULATION_IN_THE_CARDIAC_CELL	35/1792	152/13198	0.00101377	0.00549289	0.0033989	35	PRKAR2B,GNAI3,ATP1B3,ATP2B1,PRKACA,GNB1,FKBP1A,PRKAR1A,PRKAR2A,GNAI2,GNB4,RGS2,GNG11,YWHAH,GNAZ,ADCY4,ARRB1,ARRB2,CALM2,PLCB3,RGS18,GNAQ,CALM3,PRKCD,YWHAZ,PRKCB,YWHAB,RGS14,GNB2,GNG5,RGS6,SLC8A1,GNG2,GRK6,GRK5
REACTOME_DEATH_RECEPTOR_SIGNALLING	33/1792	141/13198	0.00103734	0.00560343	0.00346731	33	CFLAR,TAB2,CASP8,TNFRSF1A,RHOA,PSEN1,CYLD,SOS2,RIPK2,TAX1BP1,USP4,ECT2,RTN4,ARHGEF2,TNFAIP3,GNA13,TNFRSF10B,TNFSF10,PREX1,ARHGEF6,ARHGEF11,RAC1,FGD4,VAV1,UBC,ADAM17,ABR,NCSTN,ARHGEF40,AKAP13,RELA,PSENEN,ITSN1
PID_KIT_PATHWAY	16/1792	52/13198	0.00103915	0.00560343	0.00346731	16	CREBBP,GSK3B,CRKL,MAPK3,GRB10,GAB1,CBL,SH2B3,FOXO3,RAF1,VAV1,SH2B2,STAT3,MAP2K1,GRB2,LYN
REACTOME_METABOLISM_OF_CARBOHYDRATES	59/1792	293/13198	0.00106053	0.00570511	0.00353022	59	IDS,CD44,VCAN,PHKA2,HEXB,PKM,NDST1,PRKACA,PGM1,NUP50,PYGL,PGK1,PHKB,XYLT1,MANBA,ST3GAL4,NUP98,GAPDH,TPI1,DSE,ARSB,PPP2CA,PFKFB4,GBE1,NUP214,CHSY1,LYVE1,SLC37A2,GNS,NUP58,GALNS,PGD,ALDOA,UBC,HK1,B3GNT7,ST3GAL2,B4GALT5,G6PD,HK3,SDC3,GYG1,TKT,ALDH1A1,FBP1,CSGALNACT2,GLB1,B3GNT2,PFKFB3,GAA,CHST11,PGAM1,HPSE,TALDO1,FUT7,CHST15,EXT1,CHP1,PAPSS2
WP_APOPTOSIS_MODULATION_AND_SIGNALING	24/1792	93/13198	0.00117497	0.00630568	0.00390185	24	CFLAR,BID,TNFRSF1B,BAK1,CASP8,TNFRSF1A,MAPK3,IL1R2,IL1R1,BIRC6,APAF1,TNFRSF10B,TNFSF10,CASP1,BCL2A1,MCL1,CRADD,FOS,TNFRSF10C,JUN,CASP4,MAP3K5,HSPA1A,NAIP
PID_TCR_JNK_PATHWAY	7/1792	14/13198	0.00120356	0.00641329	0.00396844	7	LCP2,MAP2K4,MAP3K1,CRKL,PRKCB,CRK,JUN
REACTOME_INTERLEUKIN_15_SIGNALING	7/1792	14/13198	0.00120356	0.00641329	0.00396844	7	GAB2,SOS2,JAK3,JAK1,STAT3,STAT5B,GRB2
REACTOME_RUNX3_REGULATES_NOTCH_SIGNALING	7/1792	14/13198	0.00120356	0.00641329	0.00396844	7	CREBBP,EP300,JAG1,KAT2B,MAML1,RBPJ,MAML3
KEGG_ANTIGEN_PROCESSING_AND_PRESENTATION	23/1792	88/13198	0.00122475	0.00651083	0.00402879	23	NFYA,HSPA5,NFYC,HSP90AA1,PSME1,HSP90AB1,HSPA8,CREB1,PSME3,CTSS,CTSB,B2M,TAP1,HSPA6,KIR2DL4,TAP2,HSPA1B,HSPA1A,HLA-C,HLA-E,HLA-A,IFI30,HLA-B
PID_HEDGEHOG_GLI_PATHWAY	15/1792	48/13198	0.00123829	0.00656733	0.00406375	15	CREBBP,PIAS1,GNAI3,PRKACA,GNB1,GSK3B,CSNK1A1,GNAI2,SPOP,GNAZ,ARRB2,CSNK1D,PRKCD,MAP2K1,GNG2
REACTOME_MHC_CLASS_II_ANTIGEN_PRESENTATION	30/1792	126/13198	0.00128425	0.00679507	0.00420468	30	CTSA,RAB7A,CAPZB,DNM2,KIF3C,SEC23A,TUBB1,CAPZA1,CTSD,TUBA1B,TUBA4A,DCTN4,DYNC1LI2,ACTR1A,CLTC,OSBPL1A,ARF1,DYNC1LI1,SEC24D,AP2M1,CTSS,CTSB,TUBA1A,KIF5B,AP1S2,TUBA8,TUBB4B,DNM3,CAPZA2,IFI30
PID_AR_TF_PATHWAY	16/1792	53/13198	0.0013038	0.00688234	0.00425868	16	CREBBP,MAP2K4,HSP90AA1,GSK3B,NCOA1,DNAJA1,EP300,MAPK14,NR3C1,KAT2B,MDM2,NCOA2,REL,NR2C2,JUN,RXRA
REACTOME_DDX58_IFIH1_MEDIATED_INDUCTION_OF_INTERFERON_ALPHA_BETA	21/1792	78/13198	0.00130827	0.0068898	0.00426329	21	CREBBP,CASP8,OTUD5,UBE2D1,ITCH,CYLD,MAVS,MAP3K1,EP300,TAX1BP1,DDX58,UBE2D3,TNFAIP3,TRIM25,TANK,UBC,UBE2L6,S100A12,RELA,TBK1,PCBP2
REACTOME_IRON_UPTAKE_AND_TRANSPORT	17/1792	58/13198	0.00134237	0.00705291	0.00436422	17	ATP6V0A1,CYBRD1,FTL,MCOLN1,HMOX1,ATP6V1D,ATP6V0E1,ATP6V1A,ATP6V0B,FBXL5,ATP6V1E1,SLC40A1,ATP6V1B2,LCN2,UBC,ATP6V0D1,FTH1
BIOCARTA_RACCYCD_PATHWAY	10/1792	26/13198	0.0013874	0.00723891	0.00447932	10	RHOA,MAPK1,MAPK3,CDKN1B,CDKN1A,RAF1,RAC1,PAK1,RELA,TFDP1
PID_ALK1_PATHWAY	10/1792	26/13198	0.0013874	0.00723891	0.00447932	10	FKBP1A,MAPK1,MAPK3,TGFB1,TGFBR1,ENG,ACVR1,ARRB2,SMAD4,TGFBR2
PID_P38_MKK3_6PATHWAY	10/1792	26/13198	0.0013874	0.00723891	0.00447932	10	TAB2,MAP3K1,GADD45B,MAPK14,TAOK3,RAC1,TXN,TAOK1,MAP3K5,MAP3K3
BIOCARTA_EDG1_PATHWAY	9/1792	22/13198	0.00144197	0.00747174	0.00462338	9	RHOA,MAPK1,MAPK3,ASAH1,PIK3CG,RAC1,PRKCB,PLCB1,ITGB3
WP_PI3KAKTMTOR_VITD3_SIGNALLING	9/1792	22/13198	0.00144197	0.00747174	0.00462338	9	SLC2A3,GSK3B,VDR,CD86,PFKFB4,LDHA,HK3,RELA,RXRA
WP_VITAMIN_D_IN_INFLAMMATORY_DISEASES	9/1792	22/13198	0.00144197	0.00747174	0.00462338	9	MAP3K1,VDR,MAPK14,NR3C1,DUSP1,PPP3CA,SMAD4,RELA,RXRA
REACTOME_ER_TO_GOLGI_ANTEROGRADE_TRANSPORT	35/1792	155/13198	0.00145812	0.0075381	0.00466445	35	CAPZB,CD59,SEC23A,CTSZ,TUBB1,CAPZA1,COPA,TUBA1B,TUBA4A,DCTN4,ARF3,DYNC1LI2,RAB1A,ACTR1A,CSNK1D,ARF1,DYNC1LI1,SEC24D,MIA3,STX5,TGFA,TUBA1A,ARF4,LMAN2,GOLGB1,RAB1B,TUBA8,COPB2,TUBB4B,CD55,SERPINA1,F5,CAPZA2,ARFGAP3,SEC22B
REACTOME_TRANSCRIPTIONAL_ACTIVITY_OF_SMAD2_SMAD3_SMAD4_HETEROTRIMER	14/1792	44/13198	0.0014685	0.00757435	0.00468688	14	UBE2D1,CCNK,PPM1A,UBE2D3,USP9X,SKIL,NCOR1,SMAD4,UBC,RNF111,SKI,JUNB,SP1,TFDP1
PID_ERBB1_RECEPTOR_PROXIMAL_PATHWAY	12/1792	35/13198	0.00153509	0.00789264	0.00488383	12	PIK3CB,GNAI3,MAPK1,MAPK3,GAB1,KRAS,TLN1,PAK1,STAT3,PTK2,PIK3CD,GRB2
BIOCARTA_MONOCYTE_PATHWAY	6/1792	11/13198	0.00155664	0.00789264	0.00488383	6	CD44,ITGB2,ITGAM,SELP,SELL,PECAM1
BIOCARTA_MYOSIN_PATHWAY	6/1792	11/13198	0.00155664	0.00789264	0.00488383	6	ROCK1,PPP1R12B,GNA13,GNAQ,PRKCB,PLCB1
REACTOME_ENDOSOMAL_VACUOLAR_PATHWAY	6/1792	11/13198	0.00155664	0.00789264	0.00488383	6	CTSS,B2M,HLA-C,HLA-E,HLA-A,HLA-B
REACTOME_MET_ACTIVATES_RAP1_AND_RAC1	6/1792	11/13198	0.00155664	0.00789264	0.00488383	6	CRKL,GAB1,RAP1A,RAC1,CRK,GRB2
REACTOME_NOTCH4_ACTIVATION_AND_TRANSMISSION_OF_SIGNAL_TO_THE_NUCLEUS	6/1792	11/13198	0.00155664	0.00789264	0.00488383	6	PSEN1,JAG1,ADAM10,NCSTN,YWHAZ,PSENEN
REACTOME_REGULATION_OF_GENE_EXPRESSION_BY_HYPOXIA_INDUCIBLE_FACTOR	6/1792	11/13198	0.00155664	0.00789264	0.00488383	6	CREBBP,EP300,HIF1A,VEGFA,EPAS1,ARNT
REACTOME_PROTEIN_UBIQUITINATION	21/1792	79/13198	0.00155822	0.00789264	0.00488383	21	PAF1,UBE2D1,UBE2A,WAC,UBE2W,UBE2R2,UBE2D3,UBE2B,USP9X,UBA1,CDC73,RTF1,BCL10,UBC,RNF20,PEX13,VCP,UBE2L3,UBE2H,HLA-A,PRKDC
WP_PRIMARY_FOCAL_SEGMENTAL_GLOMERULOSCLEROSIS_FSGS	20/1792	74/13198	0.00160352	0.00810387	0.00501453	20	PLAUR,VIM,VCL,MYH9,JAG1,TGFB1,CDKN1B,CDKN1A,CDKN1C,ACTN4,TLR4,TLN1,ILK,CTNNB1,PTK2,LIMS1,CDH2,MME,CR1,ITGB3
PID_P53_REGULATION_PATHWAY	17/1792	59/13198	0.00165122	0.00832626	0.00515215	17	CREBBP,UBE2D1,GSK3B,EP300,PRMT5,YY1,MAPK14,PPP2CA,CSNK1A1,KAT2B,MDM2,FBXO11,CSNK1D,SETD7,PRKCD,PPM1D,KMT5A
KEGG_GAP_JUNCTION	23/1792	90/13198	0.00169467	0.0085263	0.00527593	23	GNAI3,PRKACA,MAPK1,SOS2,TUBB1,MAPK3,GNAI2,TUBA1B,TUBA4A,ADCY4,RAF1,KRAS,CSNK1D,PLCB3,GNAQ,PRKCB,TUBA1A,MAP2K1,MAP3K2,GRB2,PLCB1,TUBA8,TUBB4B
ST_JNK_MAPK_PATHWAY	13/1792	40/13198	0.00173052	0.00868728	0.00537554	13	TAB2,MAP2K4,CDC42,MAP3K20,MAP3K1,GAB1,IL1R1,DUSP10,MAP3K2,NR2C2,JUN,MAP3K5,MAP3K3
KEGG_GNRH_SIGNALING_PATHWAY	25/1792	101/13198	0.00177345	0.00888303	0.00549667	25	MAP2K4,CDC42,PRKACA,MAP3K1,MAPK1,SOS2,MAPK3,MAPK14,HBEGF,PTK2B,ADCY4,RAF1,KRAS,CALM2,PLCB3,GNAQ,CALM3,PRKCD,PRKCB,MAP2K1,MAP3K2,JUN,GRB2,PLCB1,MAP3K3
SIG_CHEMOTAXIS	14/1792	45/13198	0.00186944	0.00934305	0.00578132	14	BTK,MYLK,ROCK1,CDC42,PIK3CG,ACTR3,ARHGEF11,ROCK2,ACTR2,PIK3R5,PAK1,INPPL1,PIK3CD,PAK2
REACTOME_INTEGRIN_SIGNALING	10/1792	27/13198	0.00193842	0.00962381	0.00595505	10	ITGA2B,APBB1IP,VWF,RAP1A,TLN1,SYK,CRK,PTK2,GRB2,ITGB3
REACTOME_INTERLEUKIN_RECEPTOR_SHC_SIGNALING	10/1792	27/13198	0.00193842	0.00962381	0.00595505	10	GAB2,PIK3CB,CSF2RB,JAK3,JAK1,INPPL1,INPP5D,PIK3CD,GRB2,CSF2RA
SIG_IL4RECEPTOR_IN_B_LYPHOCYTES	10/1792	27/13198	0.00193842	0.00962381	0.00595505	10	GSK3B,MAPK1,SOS2,MAPK3,JAK3,RAF1,JAK1,STAT6,PIK3CD,GRB2
BIOCARTA_IL3_PATHWAY	7/1792	15/13198	0.00199362	0.0098114	0.00607113	7	CSF2RB,MAPK3,RAF1,MAP2K1,FOS,STAT5B,GRB2
PID_ARF6_DOWNSTREAM_PATHWAY	7/1792	15/13198	0.00199362	0.0098114	0.00607113	7	PLAUR,RHOA,MAPK1,MAPK3,RAB11A,RAC1,ARF1
PID_THROMBIN_PAR4_PATHWAY	7/1792	15/13198	0.00199362	0.0098114	0.00607113	7	RHOA,ROCK1,GNB1,GNA13,ROCK2,GNAQ,GNG2
REACTOME_PHOSPHORYLATION_SITE_MUTANTS_OF_CTNNB1_ARE_NOT_TARGETED_TO_THE_PROTEASOME_BY_THE_DESTRUCTION_COMPLEX	7/1792	15/13198	0.00199362	0.0098114	0.00607113	7	PPP2R5A,PPP2R5B,GSK3B,PPP2CA,CSNK1A1,APC,CTNNB1
REACTOME_REGULATION_OF_CHOLESTEROL_BIOSYNTHESIS_BY_SREBP_SREBF_	16/1792	55/13198	0.00200536	0.00984766	0.00609357	16	NFYA,CREBBP,NFYC,SMARCD3,NCOA1,SEC23A,TBL1X,KPNB1,HMGCR,NCOA2,SEC24D,TBL1XR1,SP1,RXRA,MTF1,NCOA6
REACTOME_COPI_MEDIATED_ANTEROGRADE_TRANSPORT	25/1792	102/13198	0.0020526	0.0100359	0.00621005	25	CAPZB,CD59,TUBB1,CAPZA1,COPA,TUBA1B,TUBA4A,DCTN4,ARF3,DYNC1LI2,RAB1A,ACTR1A,ARF1,DYNC1LI1,STX5,TUBA1A,ARF4,GOLGB1,RAB1B,TUBA8,COPB2,TUBB4B,CD55,CAPZA2,ARFGAP3
REACTOME_PI3K_AKT_SIGNALING_IN_CANCER	25/1792	102/13198	0.0020526	0.0100359	0.00621005	25	PIK3CB,GSK3B,GAB1,CDKN1B,HBEGF,CD86,STRN,CREB1,FOXO3,NR4A1,CDKN1A,EREG,RAC2,KL,MDM2,RAC1,VAV1,PIK3AP1,NRG1,TGFA,RICTOR,PIK3CD,RHOG,GRB2,FOXO4
WP_APOPTOSIS	22/1792	86/13198	0.00208432	0.0101135	0.00625807	22	CFLAR,BID,TNFRSF1B,BAK1,CASP8,MAP2K4,TNFRSF1A,MAP3K1,BNIP3L,APAF1,TNFRSF10B,TNFSF10,IRF1,MDM2,CASP1,SCAF11,MCL1,IRF2,CRADD,RELA,JUN,CASP4
BIOCARTA_HER2_PATHWAY	9/1792	23/13198	0.00208642	0.0101135	0.00625807	9	MAPK1,EP300,MAPK3,PIK3CG,RAF1,IL6R,STAT3,MAP2K1,GRB2
BIOCARTA_PTDINS_PATHWAY	9/1792	23/13198	0.00208642	0.0101135	0.00625807	9	BTK,GSK3B,JAG1,ARHGEF2,RAC1,ARF1,RAB5A,AP2M1,LYN
WP_PHOTODYNAMIC_THERAPYINDUCED_NFE2L2_NRF2_SURVIVAL_SIGNALING	9/1792	23/13198	0.00208642	0.0101135	0.00625807	9	ABCC6,HMOX1,ABCC3,MAPK14,NFE2L2,NQO2,EPHX1,FOS,JUN
BIOCARTA_TID_PATHWAY	8/1792	19/13198	0.00213304	0.0102513	0.00634334	8	IFNGR1,TNFRSF1B,TNFRSF1A,LIN7A,IFNGR2,RELA,HSPA1A,TAX1BP3
PID_HIF1A_PATHWAY	8/1792	19/13198	0.00213304	0.0102513	0.00634334	8	HSP90AA1,HIF1A,COPS5,OS9,EGLN1,ARNT,HIF1AN,EGLN2
WP_IL9_SIGNALING_PATHWAY	8/1792	19/13198	0.00213304	0.0102513	0.00634334	8	MAPK1,MAPK3,JAK3,JAK1,STAT3,MAP2K1,STAT5B,GRB2
WP_SEROTONIN_RECEPTOR_467_AND_NR3C_SIGNALING	8/1792	19/13198	0.00213304	0.0102513	0.00634334	8	MAPK1,MAPK3,NR3C1,RAP1A,CREB1,BRAF,MAPKAPK2,MAP2K1
REACTOME_INTEGRATION_OF_ENERGY_METABOLISM	26/1792	108/13198	0.00221704	0.0106324	0.00657913	26	PRKAR2B,ADIPOR2,ACSL4,PRKACA,GNB1,PRKAR1A,PPP2CA,PRKAR2A,GNAI2,GNB4,RAP1A,ACSL3,GNG11,ADCY4,IQGAP1,PLCB3,CYSLTR2,GNAQ,TKT,GNB2,GNG5,TALDO1,PLCB1,GNG2,AGPAT1,MARCKS
WP_BLADDER_CANCER	13/1792	41/13198	0.00222383	0.0106423	0.00658526	13	DAPK2,MAPK1,MMP9,VEGFA,HBEGF,CDKN1A,RAF1,KRAS,MDM2,THBS1,BRAF,MAP2K1,DAPK1
REACTOME_NUCLEAR_ENVELOPE_NE_REASSEMBLY	20/1792	76/13198	0.00227115	0.0108457	0.00671114	20	SIRT2,TUBB1,KPNB1,NUP98,LMNB1,PPP2CA,CHMP3,TUBA1B,TUBA4A,CHMP2A,NUP58,LBR,AHCTF1,LMNA,TUBA1A,RCC1,IST1,TUBA8,TUBB4B,PPP2R2A
REACTOME_REGULATION_OF_MECP2_EXPRESSION_AND_ACTIVITY	11/1792	32/13198	0.00233547	0.0111293	0.00688662	11	PRKACA,AGO1,TNRC6B,TBL1X,CREB1,AGO2,AGO3,AGO4,NCOR1,LBR,TBL1XR1
PID_TNF_PATHWAY	14/1792	46/13198	0.00235705	0.0111848	0.00692097	14	TNFRSF1B,TAB2,CASP8,TNFRSF1A,MAP4K4,CYLD,RFFL,MAP3K1,TNFAIP3,TXN,ADAM17,RELA,MAP3K5,MAP3K3
WP_ENVELOPE_PROTEINS_AND_THEIR_POTENTIAL_ROLES_IN_EDMD_PHYSIOPATHOLOGY	14/1792	46/13198	0.00235705	0.0111848	0.00692097	14	SYNE2,RHOA,MAPK1,SOS2,MAPK3,TGFB1,ADCY4,KRAS,SMAD4,LBR,MAP2K1,KIF5B,TMEM43,GRB2
WP_CILIARY_LANDSCAPE	45/1792	219/13198	0.0026197	0.0124051	0.00767604	45	CREBBP,PAFAH1B1,EHD3,VIM,WNK1,CTSA,RAB21,MAEA,MYL6,APMAP,GLA,RAB2A,ERF,TTC26,EXOC8,YPEL5,COPS5,ACSL3,MKLN1,APC,RAC1,MFAP1,IQGAP1,CEP170,CALM2,RALB,DYNC1LI1,IQGAP2,DYNLT1,DOCK5,LCN2,RMND5A,RPGR,ZYG11B,WDR26,MAPRE2,RAB8A,CTNNB1,AGPAT2,GLB1,CTBP2,UBE2H,BBIP1,RBM14,ARFGAP3
PID_LIS1_PATHWAY	10/1792	28/13198	0.00265313	0.0124847	0.00772529	10	PAFAH1B1,RHOA,CDC42,CLIP1,RAC1,IQGAP1,DYNLT1,LRPAP1,NDEL1,PAFAH1B2
REACTOME_BUDDING_AND_MATURATION_OF_HIV_VIRION	10/1792	28/13198	0.00265313	0.0124847	0.00772529	10	TSG101,CHMP5,CHMP3,VPS4B,CHMP2A,VPS37B,UBC,VPS37A,UBAP1,VPS37C
REACTOME_THE_ROLE_OF_NEF_IN_HIV_1_REPLICATION_AND_DISEASE_PATHOGENESIS	10/1792	28/13198	0.00265313	0.0124847	0.00772529	10	HCK,DOCK2,RAC1,ARF1,ELMO1,AP2M1,B2M,PAK2,AP1S2,HLA-A
REACTOME_CHROMATIN_MODIFYING_ENZYMES	54/1792	274/13198	0.00275104	0.0128397	0.00794499	54	CREBBP,KMT2E,KDM7A,PHF20,ARID4A,ARID4B,KMT2C,JMJD6,KDM5A,JADE1,SMARCD3,KAT6A,NCOA1,RCOR1,BRPF3,EP300,PRMT5,TBL1X,SUPT20H,CHD4,SUDS3,BRD8,KAT2B,KDM3A,ASH1L,PADI2,KDM5B,RBBP5,DR1,KANSL1,TAF12,KDM3B,MORF4L2,USP22,KDM4B,KDM6B,PHF21A,NCOA2,NCOR1,GATAD2B,SETD7,KDM6A,NSD3,PADI4,ATXN7,NSD1,ATF7IP,RELA,KDM2A,TBL1XR1,SETD2,KMT5A,MORF4L1,MSL1
BIOCARTA_CBL_PATHWAY	6/1792	12/13198	0.00275706	0.0128397	0.00794499	6	SH3GLB1,CBL,SH3KBP1,PRKCB,GRB2,CSF1R
REACTOME_ERYTHROPOIETIN_ACTIVATES_PHOSPHOINOSITIDE_3_KINASE_PI3K_	6/1792	12/13198	0.00275706	0.0128397	0.00794499	6	PIK3CB,PIK3CG,GAB1,PIK3R5,PIK3CD,LYN
REACTOME_NOTCH2_INTRACELLULAR_DOMAIN_REGULATES_TRANSCRIPTION	6/1792	12/13198	0.00275706	0.0128397	0.00794499	6	EP300,CREB1,NOTCH2,MAML1,RBPJ,MAML3
WP_RALA_DOWNSTREAM_REGULATED_GENES	6/1792	12/13198	0.00275706	0.0128397	0.00794499	6	RALBP1,CDC42,EXOC8,RAC2,KRAS,RAC1
REACTOME_ASPARAGINE_N_LINKED_GLYCOSYLATION	59/1792	305/13198	0.00281178	0.0130675	0.00808596	59	CTSA,ST6GALNAC2,SEL1L,CAPZB,CD59,EDEM2,NANS,SEC23A,CTSZ,TUBB1,ST3GAL4,MAN1A1,ST8SIA4,EDEM3,CAPZA1,RAD23B,COPA,TUBA1B,NAGK,TUBA4A,DCTN4,ARF3,OS9,DYNC1LI2,NPL,UGGT1,RAB1A,ACTR1A,RNF185,CSNK1D,ARF1,DYNC1LI1,SEC24D,UBC,MIA3,ST3GAL2,B4GALT5,STX5,TGFA,RPN1,VCP,TUBA1A,ARF4,LMAN2,GLB1,GOLGB1,RAB1B,TUBA8,ST6GALNAC3,COPB2,TUBB4B,CD55,SERPINA1,F5,CAPZA2,NEU1,RNF103,ARFGAP3,SEC22B
PID_UPA_UPAR_PATHWAY	13/1792	42/13198	0.00282697	0.0130842	0.00809625	13	PLAUR,ITGB5,MMP9,TGFB1,LRP1,RAC1,ITGB2,ITGA5,CRK,ITGAM,FPR2,FPR1,ITGB3
REACTOME_ACTIVATION_OF_GENE_EXPRESSION_BY_SREBF_SREBP_	13/1792	42/13198	0.00282697	0.0130842	0.00809625	13	NFYA,CREBBP,NFYC,SMARCD3,NCOA1,TBL1X,HMGCR,NCOA2,TBL1XR1,SP1,RXRA,MTF1,NCOA6
KEGG_DORSO_VENTRAL_AXIS_FORMATION	9/1792	24/13198	0.00294084	0.0135187	0.00836517	9	MAPK1,SOS2,MAPK3,KRAS,NOTCH2,ETV6,ETS2,MAP2K1,GRB2
REACTOME_DARPP_32_EVENTS	9/1792	24/13198	0.00294084	0.0135187	0.00836517	9	PRKAR2B,PDE4A,PRKACA,PRKAR1A,PDE4D,PPP2CA,PRKAR2A,PPP3CA,PDE4B
ST_DIFFERENTIATION_PATHWAY_IN_PC12_CELLS	14/1792	47/13198	0.00294485	0.0135187	0.00836517	14	CREBBP,MAP2K4,CRKL,MAPK1,MAPK3,ASAH1,CREB1,CREB5,GNAQ,BRAF,CAMP,TUBA1A,PIK3CD,JUN
WP_THYMIC_STROMAL_LYMPHOPOIETIN_TSLP_SIGNALING_PATHWAY	14/1792	47/13198	0.00294485	0.0135187	0.00836517	14	BTK,GAB2,MAPK1,HCK,MAPK3,MAPK14,TNFSF4,JAK1,STAT6,STAT3,MAP2K1,RELA,STAT5B,LYN
PID_IL12_2PATHWAY	17/1792	62/13198	0.0029568	0.013546	0.00838204	17	RAB7A,IL12RB2,GADD45B,RIPK2,MAPK14,IL1R1,IL18R1,IL18RAP,IL1B,HLX,PPP3CA,B2M,STAT6,STAT3,FOS,RELA,HLA-A
WP_NETRINUNC5B_SIGNALING_PATHWAY	15/1792	52/13198	0.00299701	0.0136472	0.00844466	15	RHOA,MAPK1,MAPK3,MAPK14,RLF,PTK2B,RAF1,AGAP2,RAC1,ALPL,INPP5D,MAP2K1,PTK2,JUN,DAPK1
PID_SHP2_PATHWAY	16/1792	57/13198	0.00299706	0.0136472	0.00844466	16	IFNGR1,GAB2,GNAI3,RHOA,PRKACA,JAK3,GAB1,VEGFA,TEK,RAF1,KRAS,ANGPT1,IL6R,JAK1,MAP2K1,GRB2
REACTOME_INTERLEUKIN_12_FAMILY_SIGNALING	16/1792	57/13198	0.00299706	0.0136472	0.00844466	16	CNN2,CDC42,IL12RB2,SOD2,LMNB1,CAPZA1,LCP1,ARF1,MSN,PDCD4,JAK1,STAT3,PITPNA,TALDO1,PAK2,SERPINB2
REACTOME_ESTROGEN_DEPENDENT_GENE_EXPRESSION	33/1792	150/13198	0.00305537	0.0138837	0.008591	33	FKBP4,POLR2J,CREBBP,HSP90AA1,NCOA1,AGO1,HSP90AB1,TNRC6B,EP300,YY1,STAG2,POLR2C,PTGES3,KAT2B,CTSD,STAG1,AGO2,NCOA3,FOSB,AGO3,KDM4B,JUND,AGO4,TLE3,NCOA2,CHD1,USF1,TGFA,RAD21,FOS,ZNF217,JUN,SP1
PID_NCADHERIN_PATHWAY	11/1792	33/13198	0.00307979	0.0138837	0.008591	11	CTNNA1,RHOA,ROCK1,CDC42,CTTN,MAPRE1,RAC1,DAGLB,CTNNB1,CDH2,KIF5B
REACTOME_CARGO_CONCENTRATION_IN_THE_ER	11/1792	33/13198	0.00307979	0.0138837	0.008591	11	CD59,SEC23A,CTSZ,SEC24D,MIA3,STX5,TGFA,LMAN2,SERPINA1,F5,SEC22B
REACTOME_SIGNAL_AMPLIFICATION	11/1792	33/13198	0.00307979	0.0138837	0.008591	11	GNAI3,GNB1,MAPK14,GNAI2,GNB4,GNA13,GNG11,GNAQ,GNB2,GNG5,GNG2
WP_HOSTPATHOGEN_INTERACTION_OF_HUMAN_CORONA_VIRUSES_INTERFERON_INDUCTION	11/1792	33/13198	0.00307979	0.0138837	0.008591	11	EIF2AK2,MAVS,DDX58,MAPK14,IFNAR1,IFNAR2,JAK1,FOS,STAT2,JUN,TBK1
BIOCARTA_CK1_PATHWAY	7/1792	16/13198	0.0031321	0.0139158	0.00861086	7	PRKAR2B,PRKAR1A,PPP2CA,PRKAR2A,PPP3CA,CSNK1D,PLCB1
REACTOME_ASSEMBLY_OF_THE_HIV_VIRION	7/1792	16/13198	0.0031321	0.0139158	0.00861086	7	TSG101,VPS37B,FURIN,UBC,VPS37A,UBAP1,VPS37C
REACTOME_CASPASE_ACTIVATION_VIA_DEATH_RECEPTORS_IN_THE_PRESENCE_OF_LIGAND	7/1792	16/13198	0.0031321	0.0139158	0.00861086	7	CFLAR,CASP8,TNFRSF10B,TNFSF10,TLR4,LY96,CD14
REACTOME_SIGNAL_REGULATORY_PROTEIN_FAMILY_INTERACTIONS	7/1792	16/13198	0.0031321	0.0139158	0.00861086	7	SKAP2,TYROBP,SIRPB1,PTK2B,PTK2,GRB2,SIRPA
REACTOME_SPRY_REGULATION_OF_FGF_SIGNALING	7/1792	16/13198	0.0031321	0.0139158	0.00861086	7	MAPK1,MAPK3,CBL,PPP2CA,UBC,BRAF,GRB2
ST_G_ALPHA_S_PATHWAY	7/1792	16/13198	0.0031321	0.0139158	0.00861086	7	MAPK1,ASAH1,CREB1,RAF1,CREB5,BRAF,CAMP
REACTOME_NOTCH4_INTRACELLULAR_DOMAIN_REGULATES_TRANSCRIPTION	8/1792	20/13198	0.0031363	0.0139158	0.00861086	8	CREBBP,EP300,KAT2B,NOTCH2,MAML1,HEY1,RBPJ,MAML3
REACTOME_SIGNALING_BY_PDGFR_IN_DISEASE	8/1792	20/13198	0.0031363	0.0139158	0.00861086	8	PIK3CB,BIN2,WDR48,STRN,KRAS,ETV6,STAT3,GRB2
PID_RAC1_REG_PATHWAY	12/1792	38/13198	0.00337487	0.0149156	0.00922951	12	RALBP1,ARHGEF2,ARHGAP9,PREX1,ARHGEF6,DOCK2,RAC1,ABI1,VAV1,ELMO1,ABR,SPATA13
ST_PHOSPHOINOSITIDE_3_KINASE_PATHWAY	12/1792	38/13198	0.00337487	0.0149156	0.00922951	12	CYTH3,BTK,GSK3B,SOS2,RPS6KA1,YWHAH,S100A9,YWHAZ,YWHAB,INPP5D,GRB2,CD55
REACTOME_PI_METABOLISM	21/1792	84/13198	0.00350378	0.015455	0.00956332	21	GDE1,PNPLA6,PIK3CB,PIK3C3,MTMR3,BMX,PIK3CG,PIKFYVE,SBF2,ARF3,MTMR6,PIK3R5,ARF1,RAB5A,SYNJ1,INPPL1,MTMR10,INPP5D,PLEKHA2,PIK3CD,RUFY1
REACTOME_SIGNALING_BY_SCF_KIT	13/1792	43/13198	0.00355718	0.0155979	0.00965174	13	GAB2,MMP9,GRB10,CBL,SH2B3,KRAS,RAC1,VAV1,SH2B2,STAT3,STAT5B,GRB2,LYN
ST_TUMOR_NECROSIS_FACTOR_PATHWAY	10/1792	29/13198	0.00356386	0.0155979	0.00965174	10	CFLAR,RALBP1,TNFRSF1B,CASP8,MAP2K4,TNFRSF1A,TNFAIP3,NR2C2,JUN,MAP3K3
WP_NANOPARTICLEMEDIATED_ACTIVATION_OF_RECEPTOR_SIGNALING	10/1792	29/13198	0.00356386	0.0155979	0.00965174	10	PXN,MAPK1,MAPK14,RAF1,KRAS,TLN1,MAP2K1,PTK2,PIK3CD,GRB2
WP_TYPE_I_INTERFERON_INDUCTION_AND_SIGNALING_DURING_SARSCOV2_INFECTION	10/1792	29/13198	0.00356386	0.0155979	0.00965174	10	EIF2AK2,MAPK14,IFNAR1,IFNAR2,JAK1,FOS,STAT2,JUN,TBK1,TREML4
PID_HES_HEY_PATHWAY	14/1792	48/13198	0.00364756	0.0158412	0.00980227	14	CREBBP,SPEN,NCOA1,EP300,HIF1A,YY1,CDKN1B,NCOR1,ARNT,MAML1,HEY1,RBPJ,STAT3,GAA
REACTOME_NOTCH1_INTRACELLULAR_DOMAIN_REGULATES_TRANSCRIPTION	14/1792	48/13198	0.00364756	0.0158412	0.00980227	14	CREBBP,EP300,HIF1A,TBL1X,TLE4,KAT2B,TLE3,NCOR1,UBC,MAML1,HEY1,RBPJ,TBL1XR1,MAML3
WP_ARYL_HYDROCARBON_RECEPTOR_PATHWAY	14/1792	48/13198	0.00364756	0.0158412	0.00980227	14	HSP90AA1,NCOA1,EP300,TGFB1,AHR,PTGES3,CDKN1B,NFE2L2,IL1B,JUND,ARNT,JUNB,JUN,SERPINB2
WP_TRANSLATION_INHIBITORS_IN_CHRONICALLY_ACTIVATED_PDGFRA_CELLS	14/1792	48/13198	0.00364756	0.0158412	0.00980227	14	PIK3CB,MAP2K4,PRKACA,EIF4G3,MAPK1,PIM2,MAPK3,PIK3CG,MAPK14,RPS6KA1,PDCD4,EIF4A2,PRKCD,MAP2K1
REACTOME_SYNTHESIS_OF_PIPS_AT_THE_PLASMA_MEMBRANE	15/1792	53/13198	0.00366538	0.015888	0.00983124	15	PIK3CB,MTMR3,BMX,PIK3CG,SBF2,MTMR6,PIK3R5,ARF1,RAB5A,SYNJ1,INPPL1,INPP5D,PLEKHA2,PIK3CD,RUFY1
REACTOME_RAB_GEFS_EXCHANGE_GTP_FOR_GDP_ON_RABS	22/1792	90/13198	0.00382504	0.0165483	0.0102398	22	RAB27A,RAB7A,RAB21,RAB10,RAB18,RIC1,RAB5C,RAB5B,RAB35,RAB32,DENND1A,RAB3IP,SBF2,RAB1A,RAB5A,RABGEF1,GAPVD1,RAB8B,RAB8A,RAB31,RAB1B,DENND5A
REACTOME_FACTORS_INVOLVED_IN_MEGAKARYOCYTE_DEVELOPMENT_AND_PLATELET_PRODUCTION	36/1792	170/13198	0.00399553	0.0171546	0.010615	36	PRKAR2B,EHD3,KIF1B,CDC42,PRKACA,CAPZB,KIF3C,RCOR1,ITPK1,TUBB1,DOCK8,PRKAR1A,EHD1,SH2B3,PRKAR2A,CAPZA1,NFE2,TUBA1B,IRF1,TUBA4A,KIF1C,DOCK2,PHF21A,RAC1,RAB5A,DOCK5,SH2B2,KIF27,TUBA1A,IRF2,KIF5B,JMJD1C,TUBA8,TUBB4B,MAFG,CAPZA2
PID_HIF2PATHWAY	11/1792	34/13198	0.00400325	0.0171546	0.010615	11	CREBBP,EP300,PGK1,VEGFA,EPAS1,BHLHE40,EGLN1,ARNT,HIF1AN,SP1,EGLN2
PID_IL1_PATHWAY	11/1792	34/13198	0.00400325	0.0171546	0.010615	11	TAB2,IRAK3,IL1R2,IL1R1,IL1B,IL1RN,CASP1,RELA,JUN,IL1RAP,MAP3K3
REACTOME_LATE_ENDOSOMAL_MICROAUTOPHAGY	11/1792	34/13198	0.00400325	0.0171546	0.010615	11	VIM,TSG101,PLIN3,HSPA8,CHMP3,CHMP2A,VPS37B,UBC,VPS37A,UBAP1,VPS37C
REACTOME_RAF_ACTIVATION	11/1792	34/13198	0.00400325	0.0171546	0.010615	11	PPP2R5A,PPP2R5B,MARK3,SHOC2,PPP2CA,RAF1,KRAS,BRAF,YWHAB,MAP2K1,PPP1CB
BIOCARTA_BAD_PATHWAY	9/1792	25/13198	0.00404901	0.0171873	0.0106352	9	PRKAR2B,MAPK1,CSF2RB,MAPK3,PIK3CG,PRKAR1A,PRKAR2A,RPS6KA1,YWHAH
PID_LYMPH_ANGIOGENESIS_PATHWAY	9/1792	25/13198	0.00404901	0.0171873	0.0106352	9	MAP2K4,MAPK1,MAPK3,MAPK14,RPS6KA1,CREB1,ITGA5,CRK,GRB2
REACTOME_G_BETA_GAMMA_SIGNALLING_THROUGH_PI3KGAMMA	9/1792	25/13198	0.00404901	0.0171873	0.0106352	9	RHOA,GNB1,PIK3CG,GNB4,GNG11,PIK3R5,GNB2,GNG5,GNG2
REACTOME_SIGNALING_BY_EGFR_IN_CANCER	9/1792	25/13198	0.00404901	0.0171873	0.0106352	9	HSP90AA1,GAB1,CBL,HBEGF,EREG,KRAS,UBC,TGFA,GRB2
WP_IL1_AND_MEGAKARYOCYTES_IN_OBESITY	9/1792	25/13198	0.00404901	0.0171873	0.0106352	9	TIMP2,MMP9,TIMP1,HBEGF,IL1R1,IL1B,NLRP3,S100A9,TLR1
REACTOME_FORMATION_OF_FIBRIN_CLOT_CLOTTING_CASCADE_	12/1792	39/13198	0.00428316	0.0180791	0.011187	12	PF4V1,VWF,F13A1,PRCP,SERPING1,PF4,GP9,THBD,PROS1,GP1BA,F5,CD177
REACTOME_NGF_STIMULATED_TRANSCRIPTION	12/1792	39/13198	0.00428316	0.0180791	0.011187	12	DNM2,EP300,CHD4,MEF2D,CREB1,SGK1,FOSB,JUND,NAB1,FOS,JUNB,TRIB1
REACTOME_PLATELET_AGGREGATION_PLUG_FORMATION_	12/1792	39/13198	0.00428316	0.0180791	0.011187	12	ITGA2B,APBB1IP,VWF,RAP1A,TLN1,SYK,CRK,PTK2,GP9,GRB2,GP1BA,ITGB3
REACTOME_E3_UBIQUITIN_LIGASES_UBIQUITINATE_TARGET_PROTEINS	16/1792	59/13198	0.00436275	0.0183806	0.0113736	16	PAF1,UBE2D1,UBE2A,WAC,UBE2D3,UBE2B,CDC73,RTF1,BCL10,UBC,RNF20,PEX13,VCP,UBE2L3,HLA-A,PRKDC
REACTOME_TP53_REGULATES_TRANSCRIPTION_OF_CELL_DEATH_GENES	13/1792	44/13198	0.00443308	0.0185585	0.0114837	13	CREBBP,BID,NLRC4,NDRG1,BNIP3L,BCL6,APAF1,TNFRSF10B,CASP1,TP53INP1,PRELID1,CRADD,TNFRSF10C
WP_INTERLEUKIN11_SIGNALING_PATHWAY	13/1792	44/13198	0.00443308	0.0185585	0.0114837	13	PIAS1,MAPK1,MAPK3,TGFB1,RPS6KA1,CREB1,RAF1,JAK1,STAT3,MAP2K1,RELA,GRB2,SOCS3
WP_COPPER_HOMEOSTASIS	15/1792	54/13198	0.0044509	0.0185585	0.0114837	15	GSK3B,FOXO3,STEAP4,APC,MDM2,SLC31A2,SLC31A1,ADAM10,ADAM17,ATP7A,ADAM9,JUN,SP1,BACE1,MTF1
BIOCARTA_RAC1_PATHWAY	8/1792	21/13198	0.00447083	0.0185585	0.0114837	8	RALBP1,PPP1R12B,MAP3K1,PIK3CG,NCF2,RAC1,VAV1,PAK1
REACTOME_ER_QUALITY_CONTROL_COMPARTMENT_ERQC_	8/1792	21/13198	0.00447083	0.0185585	0.0114837	8	SEL1L,EDEM2,EDEM3,OS9,UGGT1,RNF185,UBC,RNF103
REACTOME_NEGATIVE_REGULATION_OF_MET_ACTIVITY	8/1792	21/13198	0.00447083	0.0185585	0.0114837	8	CBL,STAM2,STAM,USP8,SH3KBP1,PTPRJ,UBC,GRB2
REACTOME_PRESYNAPTIC_FUNCTION_OF_KAINATE_RECEPTORS	8/1792	21/13198	0.00447083	0.0185585	0.0114837	8	GNB1,GNB4,GNG11,PLCB3,GNB2,GNG5,PLCB1,GNG2
REACTOME_SIGNAL_TRANSDUCTION_BY_L1	8/1792	21/13198	0.00447083	0.0185585	0.0114837	8	ITGA2B,MAPK1,MAPK3,RAC1,PAK1,ITGA5,MAP2K1,ITGB3
REACTOME_RECYCLING_PATHWAY_OF_L1	14/1792	49/13198	0.00448096	0.0185663	0.0114885	14	DNM2,MAPK1,TUBB1,RPS6KA1,TUBA1B,TUBA4A,NUMB,CLTC,MSN,AP2M1,TUBA1A,TUBA8,TUBB4B,DNM3
BIOCARTA_PCAF_PATHWAY	6/1792	13/13198	0.0045362	0.018658	0.0115453	6	CREBBP,KAT2B,IRF1,IRF2,RELA,JUN
REACTOME_ERKS_ARE_INACTIVATED	6/1792	13/13198	0.0045362	0.018658	0.0115453	6	MAPK1,MAPK3,VRK3,DUSP3,PPP2CA,DUSP6
REACTOME_MITOTIC_TELOPHASE_CYTOKINESIS	6/1792	13/13198	0.0045362	0.018658	0.0115453	6	WAPL,PDS5B,STAG2,STAG1,NIPBL,RAD21
WP_MFAP5MEDIATED_OVARIAN_CANCER_CELL_MOTILITY_AND_INVASIVENESS	6/1792	13/13198	0.0045362	0.018658	0.0115453	6	MAPK1,MAPK3,CREB1,PTK2,JUN,ITGB3
REACTOME_TRANSCRIPTIONAL_REGULATION_BY_TP53	67/1792	362/13198	0.00462332	0.0189457	0.0117233	67	POLR2J,CREBBP,BID,RRAGD,PHF20,RRM2B,KAT6A,CCNK,NLRC4,AGO1,RFFL,BRPF3,TNRC6B,EP300,PRMT5,POLR2C,NDRG1,BNIP3L,ELL,LAMTOR3,CDKN1B,CHD4,MAPK14,CNOT6,PPP2CA,BCL6,ARID3A,SGK1,TAF12,APAF1,TNFRSF10B,AGO2,CDKN1A,AGO3,YWHAH,SESN2,PRKAA1,LAMTOR5,AGO4,MDM2,TXN,CASP1,GATAD2B,LAMTOR1,UBC,CNOT8,BTG2,G6PD,ZNF385A,HIPK1,RICTOR,YWHAZ,TP53INP1,YWHAB,CDK12,ING2,PRELID1,CRADD,FOS,BANP,TNFRSF10C,PLK3,JUN,KMT5A,LAMTOR4…
REACTOME_SYNTHESIS_OF_ACTIVE_UBIQUITIN_ROLES_OF_E1_AND_E2_ENZYMES	10/1792	30/13198	0.00470573	0.0189457	0.0117233	10	UBE2D1,UBE2A,UBE2W,UBE2R2,UBE2B,USP9X,UBA1,UBC,UBE2L3,UBE2H
WP_EXTRACELLULAR_VESICLEMEDIATED_SIGNALING_IN_RECIPIENT_CELLS	10/1792	30/13198	0.00470573	0.0189457	0.0117233	10	TGFB1,TGFBR1,RAF1,KRAS,APC,PIK3R5,SMAD4,TGFA,TGFBR2,CTNNB1
WP_PI3KAKTMTOR_SIGNALING_PATHWAY_AND_THERAPEUTIC_OPPORTUNITIES	10/1792	30/13198	0.00470573	0.0189457	0.0117233	10	RB1CC1,PIK3CB,GSK3B,PIK3CG,GRB10,CDKN1B,FOXO3,KRAS,RICTOR,FOXO4
WP_SPHINGOLIPID_PATHWAY	10/1792	30/13198	0.00470573	0.0189457	0.0117233	10	GBA2,SPTLC1,SPTLC2,ASAH1,SERINC1,PPP2CA,CERS2,SGMS2,GBA,SGMS1
BIOCARTA_GCR_PATHWAY	7/1792	17/13198	0.004707	0.0189457	0.0117233	7	HSP90AA1,PIK3CG,NR3C1,ANXA1,CALM2,CALM3,RELA
BIOCARTA_SPRY_PATHWAY	7/1792	17/13198	0.004707	0.0189457	0.0117233	7	MAPK1,MAPK3,CBL,RAF1,SPRY3,MAP2K1,GRB2
REACTOME_FOXO_MEDIATED_TRANSCRIPTION_OF_CELL_CYCLE_GENES	7/1792	17/13198	0.004707	0.0189457	0.0117233	7	CDKN1B,FOXO3,CDKN1A,BTG1,KLF4,SMAD4,FOXO4
SA_PTEN_PATHWAY	7/1792	17/13198	0.004707	0.0189457	0.0117233	7	IPCEF1,MAPK1,MAPK3,PTK2B,ILK,PIK3CD,GRB2
WP_GLYCOSAMINOGLYCAN_DEGRADATION	7/1792	17/13198	0.004707	0.0189457	0.0117233	7	IDS,HEXB,ARSB,GNS,GALNS,GLB1,HPSE
WP_INTERACTOME_OF_POLYCOMB_REPRESSIVE_COMPLEX_2_PRC2	7/1792	17/13198	0.004707	0.0189457	0.0117233	7	JARID2,BCLAF1,THRAP3,ELL,SETX,STK38,MORC3
WP_MAP3K1_ROLE_IN_PROMOTING_AND_BLOCKING_GONADAL_DETERMINATION	7/1792	17/13198	0.004707	0.0189457	0.0117233	7	RHOA,ROCK1,GSK3B,MAP3K1,MAPK1,FRAT1,CTNNB1
REACTOME_P75_NTR_RECEPTOR_MEDIATED_SIGNALLING	23/1792	97/13198	0.00472426	0.0189813	0.0117453	23	RHOA,PSEN1,SOS2,RIPK2,ECT2,RTN4,ARHGEF2,GNA13,PREX1,ARHGEF6,ARHGEF11,RAC1,FGD4,VAV1,UBC,ADAM17,ABR,NCSTN,ARHGEF40,AKAP13,RELA,PSENEN,ITSN1
WP_PARKINUBIQUITIN_PROTEASOMAL_SYSTEM_PATHWAY	18/1792	70/13198	0.00480188	0.0192588	0.011917	18	RNF19A,HSPA5,CASP8,TUBB1,HSPA8,TUBA1B,TUBA4A,UBA1,CASP1,UBE2L6,TUBA1A,HSPA6,TUBA8,UBE2L3,TUBB4B,SIAH1,HSPA1B,HSPA1A
PID_ARF6_PATHWAY	11/1792	35/13198	0.00513449	0.0205562	0.0127198	11	ITGA2B,CYTH3,IPCEF1,PXN,CYTH2,ACAP2,ARRB1,ARRB2,IQSEC1,GNAQ,ITGB3
PID_FGF_PATHWAY	15/1792	55/13198	0.00536798	0.0214515	0.0132738	15	PLAUR,CTTN,MAPK1,MMP9,MAPK3,GAB1,CBL,RPS6KA1,SPP1,PTK2B,FOS,CDH2,STAT5B,JUN,GRB2
ST_B_CELL_ANTIGEN_RECEPTOR	12/1792	40/13198	0.00537714	0.0214515	0.0132738	12	BTK,MAPK1,SOS2,NFAT5,RAF1,VAV1,SYK,MAP2K1,PIK3CD,GRB2,PLCG2,LYN
WP_VIRAL_ACUTE_MYOCARDITIS	21/1792	87/13198	0.00543683	0.0214855	0.0132948	21	BID,CASP8,GSK3B,MAPK1,MMP9,MAPK3,TGFB1,EIF4G2,CREB1,RAC2,TLR4,CASP1,BNIP2,ITGB2,JAK1,ILK,NOD2,STAT3,TLR5,CD55,AIF1
BIOCARTA_VIP_PATHWAY	9/1792	26/13198	0.00545809	0.0214855	0.0132948	9	PRKAR2B,MAP3K1,PRKAR1A,PRKAR2A,PPP3CA,CALM2,GNAQ,CALM3,RELA
PID_HDAC_CLASSIII_PATHWAY	9/1792	26/13198	0.00545809	0.0214855	0.0132948	9	CREBBP,SIRT2,EP300,KAT2B,MEF2D,FOXO3,TUBA1B,CDKN1A,FOXO4
REACTOME_CASPASE_ACTIVATION_VIA_EXTRINSIC_APOPTOTIC_SIGNALLING_PATHWAY	9/1792	26/13198	0.00545809	0.0214855	0.0132948	9	CFLAR,DAPK2,CASP8,TNFRSF10B,TNFSF10,TLR4,LY96,CD14,DAPK1
REACTOME_CONSTITUTIVE_SIGNALING_BY_AKT1_E17K_IN_CANCER	9/1792	26/13198	0.00545809	0.0214855	0.0132948	9	GSK3B,CDKN1B,CREB1,FOXO3,NR4A1,CDKN1A,MDM2,RICTOR,FOXO4
WP_EPO_RECEPTOR_SIGNALING	9/1792	26/13198	0.00545809	0.0214855	0.0132948	9	PTPRC,MAPK1,MAPK3,PIK3CG,RAF1,STAT3,MAP2K1,STAT5B,GRB2
REACTOME_SARS_COV_1_INFECTION	14/1792	50/13198	0.00546193	0.0214855	0.0132948	14	ST6GALNAC2,PIK3C3,GSK3B,ST3GAL4,CHMP3,CHMP2A,PARP9,MAP1LC3B,GALNT1,UBC,PARP8,ST3GAL2,VCP,ST6GALNAC3
REACTOME_SIGNALING_BY_ERBB2	14/1792	50/13198	0.00546193	0.0214855	0.0132948	14	RHOA,HSP90AA1,GAB1,HBEGF,EREG,PTPN12,DIAPH1,KRAS,USP8,UBC,NRG1,PRKCD,GRB2,RNF41
ST_T_CELL_SIGNAL_TRANSDUCTION	13/1792	45/13198	0.00547455	0.0214976	0.0133024	13	LCP2,PTPRC,MAPK1,SOS2,NFAT5,CBL,RAF1,VAV1,PAK1,CTLA4,RASGRP4,GRB2,PAK2
KEGG_SPLICEOSOME	28/1792	127/13198	0.00585453	0.0229497	0.0142009	28	DHX8,RBM22,HNRNPC,CDC5L,SF3A1,ACIN1,CRNKL1,BUD31,HSPA8,SRSF9,SF3B6,SF3B1,SRSF4,SYF2,SMNDC1,PRPF38B,ZMAT2,HNRNPU,TRA2A,SLU7,HNRNPK,PRPF18,PCBP1,HSPA6,HSPA1B,HSPA1A,ISY1,RBM8A
REACTOME_TRANSPORT_TO_THE_GOLGI_AND_SUBSEQUENT_MODIFICATION	38/1792	186/13198	0.0059349	0.0232244	0.0143709	38	CAPZB,CD59,SEC23A,CTSZ,TUBB1,ST3GAL4,MAN1A1,CAPZA1,COPA,TUBA1B,TUBA4A,DCTN4,ARF3,DYNC1LI2,RAB1A,ACTR1A,CSNK1D,ARF1,DYNC1LI1,SEC24D,MIA3,B4GALT5,STX5,TGFA,TUBA1A,ARF4,LMAN2,GOLGB1,RAB1B,TUBA8,COPB2,TUBB4B,CD55,SERPINA1,F5,CAPZA2,ARFGAP3,SEC22B
BIOCARTA_IL1R_PATHWAY	10/1792	31/13198	0.00611622	0.0238511	0.0147587	10	IRAK3,MAP3K1,TGFB1,MAPK14,IL1R1,IL1B,IL1RN,RELA,JUN,IL1RAP
WP_CELL_MIGRATION_AND_INVASION_THROUGH_P75NTR	10/1792	31/13198	0.00611622	0.0238511	0.0147587	10	RHOA,MMP9,MMP8,KIDINS220,RAC1,ARF1,PARD3,PAK1,STAT3,JUN
REACTOME_ADP_SIGNALLING_THROUGH_P2Y_PURINOCEPTOR_12	8/1792	22/13198	0.00620161	0.0240593	0.0148875	8	GNAI3,GNB1,GNAI2,GNB4,GNG11,GNB2,GNG5,GNG2
REACTOME_ERK_MAPK_TARGETS	8/1792	22/13198	0.00620161	0.0240593	0.0148875	8	MAPK1,MAPK3,VRK3,DUSP3,MAPK14,PPP2CA,RPS6KA1,DUSP6
REACTOME_NOTCH2_ACTIVATION_AND_TRANSMISSION_OF_SIGNAL_TO_THE_NUCLEUS	8/1792	22/13198	0.00620161	0.0240593	0.0148875	8	PSEN1,JAG1,MIB1,NOTCH2,ADAM10,UBC,NCSTN,PSENEN
KEGG_WNT_SIGNALING_PATHWAY	32/1792	151/13198	0.00631888	0.0244721	0.0151429	32	CREBBP,PPP2R5A,RHOA,ROCK1,PPP2R5B,PRKACA,PSEN1,GSK3B,EP300,TBL1X,NFAT5,PPP2CA,CSNK1A1,RAC2,ROCK2,APC,RAC1,PPP3CA,SMAD4,DAAM2,PLCB3,SENP2,FRAT1,PRKCB,CTNNB1,CTBP2,TBL1XR1,JUN,FRAT2,PLCB1,CHP1,SIAH1
WP_FRAGILE_X_SYNDROME	27/1792	122/13198	0.00637704	0.0245728	0.0152053	27	PIK3CB,PPP2R5B,PRKACA,DNM2,MAPK1,DICER1,MMP9,FMR1,DUSP3,PRKAR1A,GAB1,CREB1,AGO2,RAF1,KRAS,AGAP2,PPP3CA,CLTC,TBC1D7,EIF4EBP2,BRAF,AP2M1,MAP2K1,GRB2,PLCB1,ABAT,NF1
REACTOME_ACTIVATION_OF_THE_AP_1_FAMILY_OF_TRANSCRIPTION_FACTORS	5/1792	10/13198	0.0063885	0.0245728	0.0152053	5	MAPK1,MAPK3,MAPK14,FOS,JUN
REACTOME_ATF6_ATF6_ALPHA_ACTIVATES_CHAPERONE_GENES	5/1792	10/13198	0.0063885	0.0245728	0.0152053	5	NFYA,HSPA5,NFYC,ATF6,DDIT3
WP_DEGRADATION_PATHWAY_OF_SPHINGOLIPIDS_INCLUDING_DISEASES	5/1792	10/13198	0.0063885	0.0245728	0.0152053	5	HEXB,GLA,GLB1,GM2A,NEU1
PID_PI3K_PLC_TRK_PATHWAY	11/1792	36/13198	0.00650394	0.0249318	0.0154274	11	GSK3B,GAB1,CREB1,FOXO3,YWHAH,KRAS,AGAP2,PRKCD,YWHAZ,YWHAB,GRB2
REACTOME_NOD1_2_SIGNALING_PATHWAY	11/1792	36/13198	0.00650394	0.0249318	0.0154274	11	TAB2,CASP8,ITCH,CYLD,RIPK2,MAPK14,TNFAIP3,CASP1,UBC,NOD2,CASP4
REACTOME_GLYCEROPHOSPHOLIPID_BIOSYNTHESIS	28/1792	128/13198	0.00654786	0.0250575	0.0155052	28	AGPAT4,DGAT2,PGS1,LPCAT2,OSBPL8,ABHD4,CDS2,LPIN2,PITPNM1,LPCAT3,PLBD1,LPGAT1,MBOAT7,SLC44A2,GPAT3,PCTP,MBOAT2,LPCAT1,ABHD3,PCYT1A,PLB1,AGPAT2,MBOAT1,PHOSPHO1,DGAT1,AGPAT1,STARD10,PISD
PID_CASPASE_PATHWAY	14/1792	51/13198	0.00660829	0.0252275	0.0156104	14	BID,VIM,CASP8,TNFRSF1A,MAP3K1,ARHGDIB,LMNB1,APAF1,CASP1,LMNA,CRADD,PTK2,CASP4,TOP1
REACTOME_DEUBIQUITINATION	56/1792	298/13198	0.00661467	0.0252275	0.0156104	56	ZRANB1,RHOA,OTUD5,POLB,UBE2D1,CYLD,UIMC1,MAVS,USP48,PSME1,JOSD1,EP300,HIF1A,YY1,USP10,RIPK2,TGFB1,TGFBR1,DDX58,SUDS3,KAT2B,USP4,WDR48,STAM2,USP34,TNFAIP3,RAD23B,TRIM25,USP22,USP9X,RHOT1,PSME3,APC,USP15,MDM2,STAM,ARRB1,USP8,WDR20,USP3,ARRB2,SMAD4,ASXL2,TNIP1,UBC,USP25,NLRP3,TGFBR2,ATXN7,VCP,NOD2,VCPIP1,YOD1,FOXO4,PSMB8,PSMB3
REACTOME_ACTIVATION_OF_NMDA_RECEPTORS_AND_POSTSYNAPTIC_EVENTS	22/1792	94/13198	0.00664087	0.0252847	0.0156457	22	PRKAR2B,PRKACA,MAPK1,PPM1F,TUBB1,MAPK3,PRKAR1A,CAMKK2,LIN7A,PRKAR2A,RPS6KA1,CREB1,TUBA1B,TUBA4A,PRKAA1,KRAS,RAC1,NRGN,NRG1,TUBA1A,TUBA8,TUBB4B
PID_RHOA_REG_PATHWAY	13/1792	46/13198	0.00670266	0.0254769	0.0157647	13	ARHGAP6,RHOA,CDKN1B,ARHGDIB,ECT2,ARHGEF2,ARAP3,ARHGAP9,ARHGEF11,VAV1,ABR,AKAP13,ARAP1
PID_ANTHRAX_PATHWAY	7/1792	18/13198	0.00681133	0.0257165	0.0159129	7	MAP2K4,MAPK1,MAPK3,IL1B,CASP1,ANTXR2,MAP2K1
REACTOME_CELL_EXTRACELLULAR_MATRIX_INTERACTIONS	7/1792	18/13198	0.00681133	0.0257165	0.0159129	7	ACTN1,PXN,VASP,ARHGEF6,RSU1,ILK,LIMS1
REACTOME_GASTRIN_CREB_SIGNALLING_PATHWAY_VIA_PKC_AND_MAPK	7/1792	18/13198	0.00681133	0.0257165	0.0159129	7	MAPK1,MAPK3,HBEGF,RPS6KA1,CREB1,KRAS,GRB2
WP_4HYDROXYTAMOXIFEN_DEXAMETHASONE_AND_RETINOIC_ACIDS_REGULATION_OF_P27_EXPRESSION	7/1792	18/13198	0.00681133	0.0257165	0.0159129	7	MKNK2,MAPK1,MAPK3,RAF1,PRKAA1,MAP2K1,MAP3K5
PID_TELOMERASE_PATHWAY	17/1792	67/13198	0.00696257	0.026169	0.0161929	17	MXD1,XRCC5,HSP90AA1,HNRNPC,MAPK1,MAPK3,TGFB1,PTGES3,CDKN1B,ZNFX1,IRF1,MAX,IFNAR2,FOS,SP3,JUN,SP1
BIOCARTA_BARR_MAPK_PATHWAY	6/1792	14/13198	0.00703568	0.026169	0.0161929	6	MAPK1,MAPK3,RAF1,ARRB1,MAP2K1,PLCB1
BIOCARTA_ERK5_PATHWAY	6/1792	14/13198	0.00703568	0.026169	0.0161929	6	MAPK1,MAPK3,PIK3CG,RPS6KA1,CREB1,GRB2
BIOCARTA_PS1_PATHWAY	6/1792	14/13198	0.00703568	0.026169	0.0161929	6	PSEN1,GSK3B,APC,ADAM17,CTNNB1,RBPJ
BIOCARTA_RANKL_PATHWAY	6/1792	14/13198	0.00703568	0.026169	0.0161929	6	EIF2AK2,FOSL2,IFNAR1,IFNAR2,FOS,RELA
BIOCARTA_UCALPAIN_PATHWAY	6/1792	14/13198	0.00703568	0.026169	0.0161929	6	CAPN1,RHOA,ACTN1,RAC1,TLN1,ITGB3
REACTOME_GOLGI_CISTERNAE_PERICENTRIOLAR_STACK_REORGANIZATION	6/1792	14/13198	0.00703568	0.026169	0.0161929	6	MAPK1,MAPK3,RAB2A,BLZF1,RAB1A,RAB1B
REACTOME_PTK6_REGULATES_RHO_GTPASES_RAS_GTPASE_AND_MAP_KINASES	6/1792	14/13198	0.00703568	0.026169	0.0161929	6	RHOA,PXN,KRAS,RAC1,ELMO1,CRK
REACTOME_TRAF3_DEPENDENT_IRF_ACTIVATION_PATHWAY	6/1792	14/13198	0.00703568	0.026169	0.0161929	6	CREBBP,MAVS,EP300,DDX58,TRIM25,TBK1
REACTOME_REGULATION_OF_INSULIN_SECRETION	19/1792	78/13198	0.0071742	0.0265965	0.0164574	19	PRKAR2B,ACSL4,PRKACA,GNB1,PRKAR1A,PRKAR2A,GNAI2,GNB4,RAP1A,ACSL3,GNG11,IQGAP1,PLCB3,GNAQ,GNB2,GNG5,PLCB1,GNG2,MARCKS
REACTOME_SIGNALING_BY_INSULIN_RECEPTOR	19/1792	78/13198	0.0071742	0.0265965	0.0164574	19	GAB2,ATP6V0A1,PIK3CB,PIK3C3,MAPK1,ATP6V1D,MAPK3,GRB10,GAB1,ATP6V0E1,ATP6V1A,ATP6V0B,ATP6V1E1,KL,KRAS,ATP6V1B2,ATP6V0D1,GRB2,TLR9
BIOCARTA_ERK_PATHWAY	9/1792	27/13198	0.00721792	0.0266272	0.0164764	9	MKNK2,MAPK1,MAPK3,PPP2CA,RPS6KA1,RAF1,STAT3,MAP2K1,GRB2
BIOCARTA_GH_PATHWAY	9/1792	27/13198	0.00721792	0.0266272	0.0164764	9	MAPK1,MAPK3,PIK3CG,RPS6KA1,RAF1,PRKCB,MAP2K1,STAT5B,GRB2
WP_CANONICAL_AND_NONCANONICAL_NOTCH_SIGNALING	9/1792	27/13198	0.00721792	0.0266272	0.0164764	9	PSEN1,JAG1,NOTCH2,ADAM10,MFAP1,MAML1,HEY1,RBPJ,MAML3
KEGG_AXON_GUIDANCE	28/1792	129/13198	0.00730795	0.0268953	0.0166423	28	GNAI3,RHOA,ROCK1,CDC42,PLXNA2,GSK3B,MAPK1,MAPK3,NFAT5,GNAI2,RAC2,KRAS,ROCK2,PLXNC1,RAC1,PPP3CA,PAK1,SEMA6B,PTK2,ABLIM3,PAK2,LIMK2,SEMA4B,CHP1,SEMA4D,SEMA4A,EPHB4,SRGAP2
REACTOME_CA2_PATHWAY	16/1792	62/13198	0.0073264	0.0268953	0.0166423	16	GNB1,AGO1,TNRC6B,GNB4,AGO2,AGO3,GNG11,KRAS,AGO4,PPP3CA,PLCB3,CTNNB1,GNB2,GNG5,PLCB1,GNG2
WP_TCELL_ANTIGEN_RECEPTOR_TCR_PATHWAY_DURING_STAPHYLOCOCCUS_AUREUS_INFECTION	16/1792	62/13198	0.0073264	0.0268953	0.0166423	16	LCP2,PTPRC,GSK3B,AHSA1,MAPK3,CBL,RAF1,BCL10,CALM2,PAK1,CTLA4,MAP2K1,FOS,JUN,GRB2,CHP1
WP_CARDIAC_HYPERTROPHIC_RESPONSE	15/1792	57/13198	0.00765859	0.028069	0.0173686	15	MAP2K4,TNFRSF1A,GSK3B,MAP3K1,MAPK1,MAPK3,TGFB1,TGFBR1,MAPK14,RAF1,RAC1,PPP3CA,CALM2,NRG1,MAP2K1
PID_IL12_STAT4_PATHWAY	10/1792	32/13198	0.00783474	0.0285291	0.0176533	10	CREBBP,TGFB1,CD86,IL18R1,IL18RAP,IRF1,PPP3CA,STAT3,FOS,JUN
PID_SYNDECAN_4_PATHWAY	10/1792	32/13198	0.00783474	0.0285291	0.0176533	10	RHOA,ACTN1,DNM2,MMP9,RAC1,SDCBP,THBS1,ITGA5,PRKCD,PTK2
REACTOME_NUCLEAR_SIGNALING_BY_ERBB4	10/1792	32/13198	0.00783474	0.0285291	0.0176533	10	TAB2,PSEN1,HBEGF,SPARC,EREG,NCOR1,ADAM17,NRG1,NCSTN,PSENEN
WP_IL17_SIGNALING_PATHWAY	10/1792	32/13198	0.00783474	0.0285291	0.0176533	10	GSK3B,MAPK1,MAPK3,JAK1,STAT3,CEBPB,RELA,IL17RA,SP1,CEBPD
KEGG_MTOR_SIGNALING_PATHWAY	14/1792	52/13198	0.00793876	0.0287684	0.0178014	14	PIK3CB,MAPK1,HIF1A,MAPK3,PIK3CG,VEGFA,RPS6KA1,PRKAA1,EIF4E2,CAB39,PIK3R5,BRAF,RICTOR,PIK3CD
PID_CD8_TCR_PATHWAY	14/1792	52/13198	0.00793876	0.0287684	0.0178014	14	LCP2,PTPRC,CBL,CD86,RAP1A,KRAS,VAV1,BCL10,PRKCB,B2M,STIM1,GRB2,HLA-A,RASSF5
REACTOME_AQUAPORIN_MEDIATED_TRANSPORT	14/1792	52/13198	0.00793876	0.0287684	0.0178014	14	PRKAR2B,PRKACA,GNB1,AQP9,RAB11A,PRKAR1A,PRKAR2A,GNB4,GNG11,ADCY4,AQP10,GNB2,GNG5,GNG2
WP_ENDOPLASMIC_RETICULUM_STRESS_RESPONSE_IN_CORONAVIRUS_INFECTION	13/1792	47/13198	0.00813947	0.0292285	0.0180861	13	HSPA5,EIF2AK2,PPP1R12A,PPP1R12B,PPP1R15A,ATF6,PPP1R3D,PPP1R15B,PPP1R3B,DDIT3,ERN1,PPP1R11,PPP1CB
WP_NOTCH_SIGNALING	13/1792	47/13198	0.00813947	0.0292285	0.0180861	13	CREBBP,PSEN1,JAG1,KAT2B,NUMB,NOTCH2,ADAM17,MAML1,NCSTN,DTX3L,RBPJ,CTBP2,MAML3
REACTOME_CELL_CELL_COMMUNICATION	28/1792	130/13198	0.00813949	0.0292285	0.0180861	28	SKAP2,TYROBP,CTNNA1,PIK3CB,ACTN1,PVR,PXN,SIRPB1,PARD6A,NECTIN1,PTK2B,VASP,ARHGEF6,NECTIN2,ACTN4,IQGAP1,RSU1,PARD3,F11R,ILK,CTNNB1,PTK2,LIMS1,CDH2,GRB2,CLDN5,SIRPA,ANG
ST_GA13_PATHWAY	11/1792	37/13198	0.00814353	0.0292285	0.0180861	11	PHKA2,PIK3CB,MAP2K4,ROCK1,CDC42,MAP3K1,GNA13,ARHGEF11,ROCK2,PTK2,MAP3K5
WP_NEOVASCULARISATION_PROCESSES	11/1792	37/13198	0.00814353	0.0292285	0.0180861	11	MAPK1,HIF1A,MMP9,JAG1,MAPK3,TGFB1,TGFBR1,ANGPT1,REL,RELA,EPHB4
WP_PRION_DISEASE_PATHWAY	11/1792	37/13198	0.00814353	0.0292285	0.0180861	11	HSPA5,SPI1,MAPK1,EP300,MAPK3,CREB1,RAD21,STAT3,PTK2,CHD2,RXRA
REACTOME_GLUCAGON_LIKE_PEPTIDE_1_GLP1_REGULATES_INSULIN_SECRETION	12/1792	42/13198	0.00822396	0.0294703	0.0182357	12	PRKAR2B,PRKACA,GNB1,PRKAR1A,PRKAR2A,GNB4,RAP1A,GNG11,IQGAP1,GNB2,GNG5,GNG2
PID_NFKAPPAB_CANONICAL_PATHWAY	8/1792	23/13198	0.00839638	0.0299928	0.018559	8	TNFRSF1A,CYLD,RIPK2,UBE2D3,TNFAIP3,BCL10,NOD2,RELA
PID_PRL_SIGNALING_EVENTS_PATHWAY	8/1792	23/13198	0.00839638	0.0299928	0.018559	8	RHOA,ROCK1,MAPK1,MAPK3,PTP4A1,TUBA1B,CDKN1A,RAC1
PID_TCR_PATHWAY	16/1792	63/13198	0.0086128	0.0307172	0.0190073	16	WAS,GAB2,LCP2,CDC42,PTPRC,SLA2,CBL,CD86,RAP1A,KRAS,VAV1,BCL10,PRKCB,STIM1,GRB2,RASSF5
REACTOME_IMMUNOREGULATORY_INTERACTIONS_BETWEEN_A_LYMPHOID_AND_A_NON_LYMPHOID_CELL	38/1792	191/13198	0.00922712	0.0328561	0.0203308	38	TYROBP,FCGR2B,PVR,ICAM3,PILRA,SIGLEC5,CLEC2B,TREML2,TREM1,SIGLEC9,NECTIN2,LILRB2,FCGR1A,CD1D,ITGB2,JAML,TREML1,CD200R1,B2M,SIGLEC7,OSCAR,CD300LB,IFITM1,CD300LF,CD300E,LILRA5,TREML4,SELL,KIR2DL4,FCGR3A,MICB,HLA-C,LILRB3,HLA-E,HLA-A,HLA-B,LILRA2,LILRA6
REACTOME_G_PROTEIN_ACTIVATION	9/1792	28/13198	0.0093802	0.0332436	0.0205706	9	GNAI3,GNB1,GNAI2,GNB4,GNG11,GNAZ,GNB2,GNG5,GNG2
REACTOME_NOTCH_HLH_TRANSCRIPTION_PATHWAY	9/1792	28/13198	0.0093802	0.0332436	0.0205706	9	CREBBP,TBL1X,KAT2B,NOTCH2,NCOR1,MAML1,RBPJ,TBL1XR1,MAML3
REACTOME_TRANSLATION_OF_STRUCTURAL_PROTEINS	9/1792	28/13198	0.0093802	0.0332436	0.0205706	9	ST6GALNAC2,GSK3B,ST3GAL4,PARP9,GALNT1,UBC,PARP8,ST3GAL2,ST6GALNAC3
WP_RAC1PAK1P38MMP2_PATHWAY	17/1792	69/13198	0.00946668	0.0334975	0.0207277	17	PXN,MAPK1,MAPK3,MAPK14,TEK,KRAS,RAC1,TNIP1,PAK1,ANGPT1,CRK,CTNNB1,STAT3,PTK2,RELA,STAT5B,GRB2
BIOCARTA_EPO_PATHWAY	7/1792	19/13198	0.00954033	0.0335998	0.020791	7	MAPK3,RAF1,MAP2K1,FOS,STAT5B,JUN,GRB2
PID_EPHA2_FWD_PATHWAY	7/1792	19/13198	0.00954033	0.0335998	0.020791	7	RHOA,CBL,RAC1,PAK1,INPPL1,PTK2,GRB2
REACTOME_INITIATION_OF_NUCLEAR_ENVELOPE_NE_REFORMATION	7/1792	19/13198	0.00954033	0.0335998	0.020791	7	SIRT2,KPNB1,LMNB1,PPP2CA,LBR,LMNA,PPP2R2A
PID_SYNDECAN_2_PATHWAY	10/1792	33/13198	0.0099021	0.0346036	0.0214121	10	RHOA,PRKACA,MAPK1,MAPK3,TGFB1,SDCBP,EPB41,ITGA5,PRKCD,NF1
REACTOME_SIALIC_ACID_METABOLISM	10/1792	33/13198	0.0099021	0.0346036	0.0214121	10	CTSA,ST6GALNAC2,NANS,ST3GAL4,ST8SIA4,NPL,ST3GAL2,GLB1,ST6GALNAC3,NEU1
WP_BDNFTRKB_SIGNALING	10/1792	33/13198	0.0099021	0.0346036	0.0214121	10	GAB2,MAPK1,PIK3CG,GAB1,RPS6KA1,CREB1,KRAS,BRAF,MAP2K1,GRB2
WP_RESISTIN_AS_A_REGULATOR_OF_INFLAMMATION	10/1792	33/13198	0.0099021	0.0346036	0.0214121	10	PIK3CB,MAPK1,MAPK3,PIK3CG,MAPK14,PLCB3,PIK3CD,RELA,PLCB1,PLCG2
WP_WHITE_FAT_CELL_DIFFERENTIATION	10/1792	33/13198	0.0099021	0.0346036	0.0214121	10	CTNNA1,NR3C1,CREB1,RARA,KLF4,TLE3,CEBPB,STAT5B,DDIT3,CEBPD
REACTOME_VASOPRESSIN_REGULATES_RENAL_WATER_HOMEOSTASIS_VIA_AQUAPORINS	12/1792	43/13198	0.0100305	0.0349109	0.0216023	12	PRKAR2B,PRKACA,GNB1,RAB11A,PRKAR1A,PRKAR2A,GNB4,GNG11,ADCY4,GNB2,GNG5,GNG2
KEGG_TIGHT_JUNCTION	28/1792	132/13198	0.0100365	0.0349109	0.0216023	28	CTNNA1,GNAI3,RHOA,CDC42,ACTN1,CTTN,MAP3K20,MYH9,MYL9,VAPA,MYL12A,PARD6A,PPP2CA,GNAI2,ASH1L,MYL12B,TJP2,ACTN4,KRAS,PARD3,F11R,EPB41,PRKCD,PRKCB,CTNNB1,HCLS1,CLDN5,PPP2R2A
WP_ANGIOPOIETIN_LIKE_PROTEIN_8_REGULATORY_PATHWAY	28/1792	132/13198	0.0100365	0.0349109	0.0216023	28	PIK3CB,MAP2K4,MAP4K4,PIK3C3,GSK3B,MAP3K1,MAPK1,SOS2,MAPK3,PIK3CG,CBL,MAPK14,RPS6KA1,FOXO3,CAP1,RAF1,PRKAA1,FLOT2,FLOT1,RICTOR,FBP1,CRK,MAP2K1,MAP3K2,PIK3CD,RXRA,MAP3K5,MAP3K3
KEGG_SNARE_INTERACTIONS_IN_VESICULAR_TRANSPORT	11/1792	38/13198	0.0100863	0.0350301	0.0216761	11	VAMP3,STX7,SNAP23,STX12,STX16,STX11,STX6,VTI1A,STX5,STX3,SEC22B
BIOCARTA_GRANULOCYTES_PATHWAY	6/1792	15/13198	0.0103971	0.0354615	0.021943	6	SELPLG,ITGB2,ITGAM,SELP,SELL,PECAM1
REACTOME_INLB_MEDIATED_ENTRY_OF_LISTERIA_MONOCYTOGENES_INTO_HOST_CELL	6/1792	15/13198	0.0103971	0.0354615	0.021943	6	CBL,STAM2,STAM,SH3KBP1,UBC,GRB2
REACTOME_PLATELET_ADHESION_TO_EXPOSED_COLLAGEN	6/1792	15/13198	0.0103971	0.0354615	0.021943	6	GP6,VWF,FCER1G,GP9,GP1BA,LYN
BIOCARTA_AGPCR_PATHWAY	5/1792	11/13198	0.0104151	0.0354615	0.021943	5	PRKAR2B,PRKAR1A,PRKAR2A,ARRB1,PRKCB
BIOCARTA_EGFR_SMRTE_PATHWAY	5/1792	11/13198	0.0104151	0.0354615	0.021943	5	MAP3K1,MAPK14,RARA,MAP2K1,RXRA
BIOCARTA_EPONFKB_PATHWAY	5/1792	11/13198	0.0104151	0.0354615	0.021943	5	HIF1A,SOD2,CDKN1A,ARNT,RELA
REACTOME_ESTABLISHMENT_OF_SISTER_CHROMATID_COHESION	5/1792	11/13198	0.0104151	0.0354615	0.021943	5	WAPL,PDS5B,STAG2,STAG1,RAD21
REACTOME_FREE_FATTY_ACIDS_REGULATE_INSULIN_SECRETION	5/1792	11/13198	0.0104151	0.0354615	0.021943	5	ACSL4,ACSL3,PLCB3,GNAQ,PLCB1
REACTOME_INTERLEUKIN_6_SIGNALING	5/1792	11/13198	0.0104151	0.0354615	0.021943	5	CBL,IL6R,JAK1,STAT3,SOCS3
REACTOME_IRAK4_DEFICIENCY_TLR2_4_	5/1792	11/13198	0.0104151	0.0354615	0.021943	5	BTK,TLR4,LY96,CD14,TLR1
REACTOME_MUCOPOLYSACCHARIDOSES	5/1792	11/13198	0.0104151	0.0354615	0.021943	5	IDS,ARSB,GNS,GALNS,GLB1
REACTOME_REGULATED_PROTEOLYSIS_OF_P75NTR	5/1792	11/13198	0.0104151	0.0354615	0.021943	5	PSEN1,ADAM17,NCSTN,RELA,PSENEN
REACTOME_RHO_GTPASES_ACTIVATE_KTN1	5/1792	11/13198	0.0104151	0.0354615	0.021943	5	RHOA,CDC42,RAC1,KIF5B,RHOG
KEGG_VASCULAR_SMOOTH_MUSCLE_CONTRACTION	25/1792	115/13198	0.0106243	0.0361193	0.02235	25	PPP1R12A,MYLK,RHOA,ROCK1,PRKACA,PPP1R12B,MYL6,MAPK1,MYL9,MAPK3,GNA13,ADCY4,RAF1,ARHGEF11,ROCK2,CALM2,PLCB3,GNAQ,BRAF,CALM3,PRKCD,PRKCB,MAP2K1,PLCB1,PPP1CB
BIOCARTA_CTCF_PATHWAY	8/1792	24/13198	0.0111242	0.037592	0.0232613	8	TGFB1,PIK3CG,TGFBR1,CDKN1B,PPP2CA,MDM2,SMAD4,TGFBR2
BIOCARTA_STRESS_PATHWAY	8/1792	24/13198	0.0111242	0.037592	0.0232613	8	MAP2K4,TNFRSF1A,MAP3K1,MAPK14,TANK,CRADD,RELA,JUN
PID_TOLL_ENDOGENOUS_PATHWAY	8/1792	24/13198	0.0111242	0.037592	0.0232613	8	VCAN,RHOA,TLR4,S100A8,LY96,S100A9,CD14,TLR1
REACTOME_THROMBOXANE_SIGNALLING_THROUGH_TP_RECEPTOR	8/1792	24/13198	0.0111242	0.037592	0.0232613	8	GNB1,GNB4,GNA13,GNG11,GNAQ,GNB2,GNG5,GNG2
REACTOME_INTERLEUKIN_1_FAMILY_SIGNALING	29/1792	139/13198	0.0112005	0.0377813	0.0233784	29	ALOX5,TAB2,MAP2K4,IRAK3,PSME1,RIPK2,IL1R2,IL1R1,IL18R1,IL18RAP,IL1B,PTPN12,PSME3,IL1RN,CASP1,PELI2,UBC,S100A12,NOD2,STAT3,MAP2K1,RELA,PELI3,TBK1,IL1RAP,PELI1,MAP3K3,PSMB8,PSMB3
KEGG_VIBRIO_CHOLERAE_INFECTION	14/1792	54/13198	0.0112305	0.0377813	0.0233784	14	ATP6V0A1,PRKACA,ATP6V1D,ATP6V0E1,ATP6V1A,ATP6V0B,TJP2,ATP6V1E1,ARF1,ATP6V1B2,ATP6V0D1,PRKCB,ERO1A,PLCG2
REACTOME_G_PROTEIN_MEDIATED_EVENTS	14/1792	54/13198	0.0112305	0.0377813	0.0233784	14	PRKAR2B,GNAI3,PRKACA,MAPK1,PRKAR1A,CAMKK2,PRKAR2A,GNAI2,CREB1,GNAZ,ADCY4,PLCB3,PRKCD,PLCB1
KEGG_HEMATOPOIETIC_CELL_LINEAGE	20/1792	87/13198	0.0114492	0.0384596	0.0237982	20	ITGA2B,CD44,CD59,IL1R2,IL1R1,IL1B,FCGR1A,CD1D,IL6R,ITGA5,GP9,ITGAM,CD14,CSF1R,GP1BA,CD55,MME,CSF2RA,CR1,ITGB3
REACTOME_NEGATIVE_REGULATION_OF_THE_PI3K_AKT_NETWORK	24/1792	110/13198	0.011609	0.0389385	0.0240945	24	PIK3CB,PPP2R5A,PPP2R5B,PHLPP1,MAPK1,MAPK3,GAB1,HBEGF,PPP2CA,CD86,STRN,EREG,RAC2,KL,RAC1,IER3,VAV1,PIK3AP1,NRG1,TGFA,PIK3CD,RHOG,GRB2,IL1RAP
PID_RB_1PATHWAY	16/1792	65/13198	0.0117221	0.0392001	0.0242564	16	CREBBP,SPI1,EP300,CDKN1B,MAPK14,E2F3,PPP2CA,ELF1,CDKN1A,RAF1,MDM2,ATF7,CEBPB,JUN,TFDP1,CEBPD
KEGG_PHOSPHATIDYLINOSITOL_SIGNALING_SYSTEM	18/1792	76/13198	0.0117392	0.0392001	0.0242564	18	PIK3CB,DGKG,PIK3C3,ITPK1,CDS2,PIK3CG,PIKFYVE,PIK3R5,CALM2,PLCB3,SYNJ1,CALM3,INPPL1,PRKCB,INPP5D,PIK3CD,PLCB1,PLCG2
REACTOME_CELL_DEATH_SIGNALLING_VIA_NRAGE_NRIF_AND_NADE	18/1792	76/13198	0.0117392	0.0392001	0.0242564	18	PSEN1,SOS2,ECT2,ARHGEF2,GNA13,PREX1,ARHGEF6,ARHGEF11,RAC1,FGD4,VAV1,UBC,ABR,NCSTN,ARHGEF40,AKAP13,PSENEN,ITSN1
WP_PI3KAKT_SIGNALING_PATHWAY	62/1792	345/13198	0.0118036	0.039357	0.0243534	62	ITGA2B,PIK3CB,PKN2,PPP2R5A,PPP2R5B,GNB1,HSP90AA1,PHLPP1,GSK3B,ITGB5,PPP2R3C,HSP90AB1,OSM,MAPK1,SOS2,MAPK3,JAK3,PIK3CG,VWF,CDKN1B,VEGFA,PPP2CA,GNB4,CREB1,SGK1,FOXO3,SPP1,TEK,CDKN1A,GNG11,FGF13,RAF1,PRKAA1,KRAS,MDM2,EIF4E2,RAC1,TLR4,THBS1,PIK3R5,IFNAR1,MCL1,CREB5,ANGPT1,PIK3AP1,IFNAR2,IL6R,ITGA5,JAK1,TGFA,SYK,MAP2K1,PTK2,PIK3CD,GNB2,RELA,GNG5,GRB2,CSF1R,GNG2,PPP2R2A,ITGB3
REACTOME_MAPK6_MAPK4_SIGNALING	21/1792	93/13198	0.0119349	0.039736	0.024588	21	CDC42,PRKACA,PSME1,AGO1,TNRC6B,HSPB1,FOXO3,AGO2,NCOA3,AGO3,PSME3,DNAJB1,AGO4,RAC1,PAK1,CDC42EP2,UBC,JUN,PAK2,PSMB8,PSMB3
KEGG_THYROID_CANCER	9/1792	29/13198	0.0119975	0.0398269	0.0246442	9	MAPK1,MAPK3,KRAS,TPM3,BRAF,CTNNB1,MAP2K1,RXRA,NCOA4
PID_IGF1_PATHWAY	9/1792	29/13198	0.0119975	0.0398269	0.0246442	9	PXN,CRKL,GRB10,RAF1,PRKCD,YWHAZ,CRK,PTK2,GRB2
REACTOME_AGGREPHAGY	12/1792	44/13198	0.0121295	0.0401466	0.024842	12	VIM,HSP90AA1,TUBB1,TUBA1B,TUBA4A,DYNC1LI2,DYNC1LI1,UBC,VCP,TUBA1A,TUBA8,TUBB4B
WP_METABOLIC_REPROGRAMMING_IN_COLON_CANCER	12/1792	44/13198	0.0121295	0.0401466	0.024842	12	PKM,PGK1,GAPDH,SDHB,LDHA,SLC16A3,PGD,G6PD,HK3,TKT,PGAM1,TALDO1
REACTOME_C_TYPE_LECTIN_RECEPTORS_CLRS_	29/1792	140/13198	0.0123466	0.0406316	0.0251421	29	CREBBP,TAB2,CASP8,PRKACA,UBE2D1,ICAM3,PSME1,EP300,IL1B,UBE2M,PSME3,RAF1,KRAS,PPP3CA,BCL10,PAK1,UBC,FCER1G,PRKCD,SYK,CLEC4E,CLEC4D,CLEC7A,RELA,PAK2,PLCG2,PSMB8,LYN,PSMB3
PID_EPHA_FWDPATHWAY	10/1792	34/13198	0.01236	0.0406316	0.0251421	10	FGR,RHOA,ROCK1,CRKL,HCK,PIK3CG,CBL,PIK3R5,CRK,LYN
REACTOME_DISEASES_OF_CARBOHYDRATE_METABOLISM	10/1792	34/13198	0.01236	0.0406316	0.0251421	10	IDS,ARSB,GBE1,GNS,GALNS,UBC,GYG1,GLB1,GAA,TALDO1
ST_WNT_BETA_CATENIN_PATHWAY	10/1792	34/13198	0.01236	0.0406316	0.0251421	10	MVP,PSEN1,GSK3B,CSNK1A1,LRP1,APC,FSTL1,SENP2,FRAT1,CTNNB1
PID_ECADHERIN_NASCENT_AJ_PATHWAY	11/1792	39/13198	0.0123661	0.0406316	0.0251421	11	CTNNA1,RHOA,CDC42,CTTN,RAP1A,RAC1,ABI1,IQGAP1,WASF2,CRK,CTNNB1
REACTOME_REGULATION_OF_HSF1_MEDIATED_HEAT_SHOCK_RESPONSE	19/1792	82/13198	0.0124084	0.0406519	0.0251547	19	FKBP4,HSPA5,GSK3B,NUP50,MAPK1,MAPK3,DNAJB6,HSPB1,HSPA8,NUP98,HSPH1,NUP214,DNAJB1,NUP58,DEDD2,MAPKAPK2,HSPA6,HSPA1B,HSPA1A
REACTOME_SIGNALING_BY_NOTCH4	19/1792	82/13198	0.0124084	0.0406519	0.0251547	19	CREBBP,PSEN1,PSME1,EP300,JAG1,KAT2B,PSME3,NOTCH2,ADAM10,UBC,MAML1,NCSTN,HEY1,YWHAZ,RBPJ,MAML3,PSMB8,PSENEN,PSMB3
WP_THE_OVERLAP_BETWEEN_SIGNAL_TRANSDUCTION_PATHWAYS_THAT_CONTRIBUTE_TO_A_RANGE_OF_LMNA_LAMINOPATHIES	15/1792	60/13198	0.0124852	0.0408442	0.0252737	15	CREBBP,GSK3B,DICER1,TGFB1,CSNK1A1,KAT2B,SPP1,AGO2,CDKN1A,APC,LMNA,CTNNB1,JUNB,CEBPB,CEBPD
BIOCARTA_NGF_PATHWAY	7/1792	20/13198	0.0129887	0.042185	0.0261034	7	MAPK3,PIK3CG,RAF1,MAP2K1,FOS,JUN,GRB2
REACTOME_LISTERIA_MONOCYTOGENES_ENTRY_INTO_HOST_CELLS	7/1792	20/13198	0.0129887	0.042185	0.0261034	7	CBL,STAM2,STAM,SH3KBP1,UBC,CTNNB1,GRB2
WP_HEREDITARY_LEIOMYOMATOSIS_AND_RENAL_CELL_CARCINOMA_PATHWAY	7/1792	20/13198	0.0129887	0.042185	0.0261034	7	CUL3,HIF1A,VEGFA,NFE2L2,PRKAA1,LDHA,EGLN1
WP_HYPERTROPHY_MODEL	7/1792	20/13198	0.0129887	0.042185	0.0261034	7	IFRD1,VEGFA,HBEGF,IL1R1,JUND,ADAM10,ATF3
WP_SEROTONIN_RECEPTOR_2_AND_ELKSRFGATA4_SIGNALING	7/1792	20/13198	0.0129887	0.042185	0.0261034	7	MAPK1,MAPK3,RAF1,KRAS,GNAQ,MAPKAPK2,MAP2K1
REACTOME_AMINO_ACIDS_REGULATE_MTORC1	14/1792	55/13198	0.0132323	0.0429145	0.0265548	14	RRAGD,ATP6V1D,LAMTOR3,ATP6V0E1,ATP6V1A,ATP6V0B,SESN2,ATP6V1E1,LAMTOR5,ATP6V1B2,LAMTOR1,ATP6V0D1,LAMTOR4,FNIP1
PID_HDAC_CLASSI_PATHWAY	16/1792	66/13198	0.0135762	0.0439665	0.0272057	16	CREBBP,MXD1,TNFRSF1A,SIRT2,PRKACA,EP300,PRMT5,YY1,CHD4,KAT2B,MAX,MBD2,NCOR1,GATAD2B,STAT3,RELA
BIOCARTA_TOLL_PATHWAY	8/1792	25/13198	0.0144536	0.0464081	0.0287166	8	PGLYRP1,EIF2AK2,MAP2K4,MAP3K1,MAPK14,FOS,RELA,JUN
PID_INTEGRIN_A9B1_PATHWAY	8/1792	25/13198	0.0144536	0.0464081	0.0287166	8	PXN,VEGFA,SPP1,F13A1,SAT1,RAC1,KCNJ15,CSF2RA
REACTOME_ADP_SIGNALLING_THROUGH_P2Y_PURINOCEPTOR_1	8/1792	25/13198	0.0144536	0.0464081	0.0287166	8	GNB1,MAPK14,GNB4,GNG11,GNAQ,GNB2,GNG5,GNG2
REACTOME_NOTCH3_ACTIVATION_AND_TRANSMISSION_OF_SIGNAL_TO_THE_NUCLEUS	8/1792	25/13198	0.0144536	0.0464081	0.0287166	8	PSEN1,JAG1,MIB1,ADAM10,UBC,NCSTN,WWP2,PSENEN
REACTOME_NOTCH3_INTRACELLULAR_DOMAIN_REGULATES_TRANSCRIPTION	8/1792	25/13198	0.0144536	0.0464081	0.0287166	8	CREBBP,EP300,KAT2B,MAML1,HEY1,RBPJ,PBX1,MAML3
WP_RELATIONSHIP_BETWEEN_INFLAMMATION_COX2_AND_EGFR	8/1792	25/13198	0.0144536	0.0464081	0.0287166	8	PIK3CB,PTGS2,MAPK1,MAPK3,PIK3CG,KRAS,BRAF,PIK3CD
BIOCARTA_SHH_PATHWAY	6/1792	16/13198	0.014756	0.0470161	0.0290927	6	PRKAR2B,GSK3B,DYRK1B,PRKAR1A,PRKAR2A,DYRK1A
REACTOME_RAP1_SIGNALLING	6/1792	16/13198	0.014756	0.0470161	0.0290927	6	PRKACA,RAP1A,RAF1,YWHAZ,YWHAB,SIPA1
REACTOME_REGULATION_OF_GENE_EXPRESSION_IN_LATE_STAGE_BRANCHING_MORPHOGENESIS_PANCREATIC_BUD_PRECURSOR_CELLS	6/1792	16/13198	0.014756	0.0470161	0.0290927	6	CREBBP,EP300,KAT2B,MAML1,RBPJ,MAML3
REACTOME_SEMA3A_PAK_DEPENDENT_AXON_REPULSION	6/1792	16/13198	0.014756	0.0470161	0.0290927	6	PLXNA2,HSP90AA1,HSP90AB1,RAC1,PAK1,PAK2
REACTOME_STING_MEDIATED_INDUCTION_OF_HOST_IMMUNE_RESPONSES	6/1792	16/13198	0.014756	0.0470161	0.0290927	6	XRCC5,TRIM21,IFI16,STAT6,TBK1,PRKDC
REACTOME_GLYCOSAMINOGLYCAN_METABOLISM	26/1792	124/13198	0.0147681	0.0470161	0.0290927	26	IDS,CD44,VCAN,HEXB,NDST1,XYLT1,ST3GAL4,DSE,ARSB,CHSY1,LYVE1,GNS,GALNS,B3GNT7,ST3GAL2,B4GALT5,SDC3,CSGALNACT2,GLB1,B3GNT2,CHST11,HPSE,CHST15,EXT1,CHP1,PAPSS2
WP_GLYCEROPHOSPHOLIPID_BIOSYNTHETIC_PATHWAY	9/1792	30/13198	0.0151226	0.0480767	0.029749	9	PIK3CB,PGS1,CDS2,LPIN2,PIK3CG,GPAT3,IPMK,PIK3CD,GK
REACTOME_LYSOSOME_VESICLE_BIOGENESIS	10/1792	35/13198	0.0152501	0.0482101	0.0298316	10	DNM2,CTSZ,HSPA8,CHMP2A,BLOC1S1,GNS,ARRB1,CLTC,ARF1,AP1S2
REACTOME_N_GLYCAN_TRIMMING_IN_THE_ER_AND_CALNEXIN_CALRETICULIN_CYCLE	10/1792	35/13198	0.0152501	0.0482101	0.0298316	10	SEL1L,EDEM2,EDEM3,RAD23B,OS9,UGGT1,RNF185,UBC,VCP,RNF103
WP_PHOTODYNAMIC_THERAPYINDUCED_NFKB_SURVIVAL_SIGNALING	10/1792	35/13198	0.0152501	0.0482101	0.0298316	10	CFLAR,TNFRSF1A,PTGS2,MMP9,VEGFA,IL1B,BCL2A1,REL,RELA,EGLN2
WP_SIGNAL_TRANSDUCTION_THROUGH_IL1R	10/1792	35/13198	0.0152501	0.0482101	0.0298316	10	IRAK3,MAP3K1,TGFB1,MAPK14,IL1R1,IL1B,IL1RN,RELA,JUN,IL1RAP
WP_MICRORNAS_IN_CARDIOMYOCYTE_HYPERTROPHY	22/1792	101/13198	0.0155085	0.0489581	0.0302945	22	PIK3CB,MYLK,MAP2K4,RHOA,ROCK1,GSK3B,MAPK1,MAPK3,TGFB1,PIK3CG,MAPK14,RAF1,ROCK2,RAC1,PPP3CA,CALM2,NRG1,PRKCB,CTNNB1,STAT3,MAP2K1,PIK3CD
BIOCARTA_CELL2CELL_PATHWAY	5/1792	12/13198	0.0158851	0.0496601	0.0307288	5	VCL,CTNNA1,ACTN1,CTNNB1,PECAM1
BIOCARTA_D4GDI_PATHWAY	5/1792	12/13198	0.0158851	0.0496601	0.0307288	5	CASP8,ARHGDIB,APAF1,CASP1,JUN
REACTOME_ATF6_ATF6_ALPHA_ACTIVATES_CHAPERONES	5/1792	12/13198	0.0158851	0.0496601	0.0307288	5	NFYA,HSPA5,NFYC,ATF6,DDIT3
REACTOME_CREB1_PHOSPHORYLATION_THROUGH_THE_ACTIVATION_OF_ADENYLATE_CYCLASE	5/1792	12/13198	0.0158851	0.0496601	0.0307288	5	PRKAR2B,PRKACA,PRKAR1A,PRKAR2A,CREB1
REACTOME_GP1B_IX_V_ACTIVATION_SIGNALLING	5/1792	12/13198	0.0158851	0.0496601	0.0307288	5	VWF,RAF1,YWHAZ,GP9,GP1BA
REACTOME_INTERLEUKIN_2_SIGNALING	5/1792	12/13198	0.0158851	0.0496601	0.0307288	5	JAK3,PTK2B,JAK1,SYK,STAT5B
WP_IL10_ANTIINFLAMMATORY_SIGNALING_PATHWAY	5/1792	12/13198	0.0158851	0.0496601	0.0307288	5	HMOX1,JAK1,STAT3,STAT2,IL10RB
REACTOME_O_LINKED_GLYCOSYLATION_OF_MUCINS	15/1792	62/13198	0.0168358	0.0525595	0.0325229	15	ST6GALNAC2,C1GALT1,GALNT7,ST3GAL4,GALNT3,GALNT1,B3GNT7,ST3GAL2,GALNT14,B4GALT5,GALNT10,B3GNT2,B3GNTL1,B3GNT5,ST6GALNAC3
REACTOME_NEUROTRANSMITTER_RECEPTORS_AND_POSTSYNAPTIC_SIGNAL_TRANSMISSION	39/1792	205/13198	0.0172437	0.0533278	0.0329984	39	PRKAR2B,GNAI3,PRKACA,GNB1,MAPK1,PPM1F,TUBB1,MAPK3,PRKAR1A,CAMKK2,LIN7A,PRKAR2A,GNAI2,GNB4,RPS6KA1,CREB1,TUBA1B,KCNJ2,TUBA4A,GNG11,ADCY4,PRKAA1,KRAS,MDM2,RAC1,PLCB3,NRGN,NPTN,NRG1,KCNJ15,AP2M1,PRKCB,TUBA1A,GNB2,GNG5,PLCB1,TUBA8,GNG2,TUBB4B
BIOCARTA_IGF1_PATHWAY	7/1792	21/13198	0.0172476	0.0533278	0.0329984	7	MAPK3,PIK3CG,RAF1,MAP2K1,FOS,JUN,GRB2
BIOCARTA_INSULIN_PATHWAY	7/1792	21/13198	0.0172476	0.0533278	0.0329984	7	MAPK3,PIK3CG,RAF1,MAP2K1,FOS,JUN,GRB2
BIOCARTA_MPR_PATHWAY	7/1792	21/13198	0.0172476	0.0533278	0.0329984	7	PRKAR2B,MAPK1,MAPK3,PRKAR1A,PRKAR2A,RPS6KA1,CAP1
BIOCARTA_NOS1_PATHWAY	7/1792	21/13198	0.0172476	0.0533278	0.0329984	7	PRKAR2B,PRKAR1A,PRKAR2A,PPP3CA,CALM2,CALM3,PRKCB
BIOCARTA_P53HYPOXIA_PATHWAY	7/1792	21/13198	0.0172476	0.0533278	0.0329984	7	HSP90AA1,EP300,HIF1A,CDKN1A,DNAJB1,MDM2,HSPA1A
KEGG_GLYCOSAMINOGLYCAN_DEGRADATION	7/1792	21/13198	0.0172476	0.0533278	0.0329984	7	IDS,HEXB,ARSB,GNS,GALNS,GLB1,HPSE
REACTOME_INTERLEUKIN_1_SIGNALING	22/1792	102/13198	0.0173142	0.0534606	0.0330805	22	TAB2,MAP2K4,IRAK3,PSME1,RIPK2,IL1R2,IL1R1,IL1B,PSME3,IL1RN,PELI2,UBC,S100A12,NOD2,MAP2K1,RELA,PELI3,IL1RAP,PELI1,MAP3K3,PSMB8,PSMB3
KEGG_PROGESTERONE_MEDIATED_OOCYTE_MATURATION	19/1792	85/13198	0.0180303	0.0555762	0.0343896	19	PIK3CB,GNAI3,PRKACA,HSP90AA1,HSP90AB1,MAPK1,MAPK3,PIK3CG,MAPK14,GNAI2,RPS6KA1,ADCY4,RAF1,KRAS,PIK3R5,BRAF,MAP2K1,PIK3CD,CDC26
PID_ECADHERIN_STABILIZATION_PATHWAY	11/1792	41/13198	0.0180734	0.0555762	0.0343896	11	VCL,CTNNA1,RHOA,ROCK1,ACTN1,VASP,NECTIN2,DIAPH1,ABI1,LPP,CTNNB1
WP_OXIDATIVE_DAMAGE	11/1792	41/13198	0.0180734	0.0555762	0.0343896	11	TNFRSF1B,BAK1,MAP2K4,CDC42,MAP3K1,CDKN1B,TDP2,APAF1,CDKN1A,CDKN1C,C5AR1
PID_IL3_PATHWAY	8/1792	26/13198	0.0184517	0.0562788	0.0348244	8	GAB2,PRKACA,OSM,CSF2RB,YWHAZ,CEBPB,STAT5B,GRB2
PID_RXR_VDR_PATHWAY	8/1792	26/13198	0.0184517	0.0562788	0.0348244	8	NCOA1,TGFB1,VDR,NR4A1,NR1H2,RARA,ABCA1,RXRA
PID_VEGFR1_PATHWAY	8/1792	26/13198	0.0184517	0.0562788	0.0348244	8	PRKACA,HSP90AA1,MAPK1,HIF1A,MAPK3,CBL,VEGFA,PRKCB
REACTOME_CALNEXIN_CALRETICULIN_CYCLE	8/1792	26/13198	0.0184517	0.0562788	0.0348244	8	SEL1L,EDEM2,EDEM3,OS9,UGGT1,RNF185,UBC,RNF103
REACTOME_INSULIN_RECEPTOR_RECYCLING	8/1792	26/13198	0.0184517	0.0562788	0.0348244	8	ATP6V0A1,ATP6V1D,ATP6V0E1,ATP6V1A,ATP6V0B,ATP6V1E1,ATP6V1B2,ATP6V0D1
REACTOME_SIGNALING_BY_ERBB2_IN_CANCER	8/1792	26/13198	0.0184517	0.0562788	0.0348244	8	HSP90AA1,GAB1,HBEGF,EREG,PTPN12,KRAS,NRG1,GRB2
ST_G_ALPHA_I_PATHWAY	10/1792	36/13198	0.0186141	0.0566974	0.0350834	10	PIK3CB,MAPK1,SOS2,ASAH1,RAF1,PLCB3,BRAF,STAT3,GRB2,PLCB1
PID_CD40_PATHWAY	9/1792	31/13198	0.018807	0.0570539	0.035304	9	MAP2K4,MAP3K1,JAK3,TDP2,MAPK14,TNFAIP3,C4BPA,RELA,JUN
REACTOME_DISASSEMBLY_OF_THE_DESTRUCTION_COMPLEX_AND_RECRUITMENT_OF_AXIN_TO_THE_MEMBRANE	9/1792	31/13198	0.018807	0.0570539	0.035304	9	PPP2R5A,PPP2R5B,GSK3B,PPP2CA,CSNK1A1,APC,FRAT1,CTNNB1,FRAT2
REACTOME_TRANSFERRIN_ENDOCYTOSIS_AND_RECYCLING	9/1792	31/13198	0.018807	0.0570539	0.035304	9	ATP6V0A1,MCOLN1,ATP6V1D,ATP6V0E1,ATP6V1A,ATP6V0B,ATP6V1E1,ATP6V1B2,ATP6V0D1
WP_GENOTOXICITY_PATHWAY	15/1792	63/13198	0.0194055	0.0587114	0.0363296	15	RRM2B,SEL1L,LRRFIP2,RAPGEF2,CDKN1A,MDM2,ARRDC4,BTG2,IKBIP,B3GNT2,PPM1D,PLK3,SERTAD1,TOPORS,CEBPD
WP_LUNG_FIBROSIS	15/1792	63/13198	0.0194055	0.0587114	0.0363296	15	ATP11A,HMOX1,MMP9,TIMP1,TGFB1,NFE2L2,SPP1,CCR2,IL1B,SKIL,FAM13A,CYSLTR2,TGFA,CEBPB,SERPINA1
BIOCARTA_NDKDYNAMIN_PATHWAY	6/1792	17/13198	0.0202373	0.0605699	0.0374796	6	PICALM,PPP3CA,CALM2,SYNJ1,CALM3,AP2M1
BIOCARTA_PML_PATHWAY	6/1792	17/13198	0.0202373	0.0605699	0.0374796	6	CREBBP,TNFRSF1B,SP100,TNFRSF1A,RARA,PRAM1
BIOCARTA_TNFR2_PATHWAY	6/1792	17/13198	0.0202373	0.0605699	0.0374796	6	TNFRSF1B,MAP3K1,TNFAIP3,DUSP1,TANK,RELA
PID_NFKAPPAB_ATYPICAL_PATHWAY	6/1792	17/13198	0.0202373	0.0605699	0.0374796	6	BCL3,MAPK14,ARRB2,REL,SYK,RELA
REACTOME_ACTIVATION_OF_IRF3_IRF7_MEDIATED_BY_TBK1_IKK_EPSILON	6/1792	17/13198	0.0202373	0.0605699	0.0374796	6	TANK,TLR4,UBC,LY96,CD14,TBK1
REACTOME_GAB1_SIGNALOSOME	6/1792	17/13198	0.0202373	0.0605699	0.0374796	6	PXN,GAB1,HBEGF,EREG,TGFA,GRB2
REACTOME_PLATELET_SENSITIZATION_BY_LDL	6/1792	17/13198	0.0202373	0.0605699	0.0374796	6	FGR,PPP2R5A,PPP2R5B,MAPK14,PPP2CA,PECAM1
WP_PLATELETMEDIATED_INTERACTIONS_WITH_VASCULAR_AND_CIRCULATING_CELLS	6/1792	17/13198	0.0202373	0.0605699	0.0374796	6	TGFB1,SELPLG,IL1B,TLR4,PF4,SELP
KEGG_TGF_BETA_SIGNALING_PATHWAY	19/1792	86/13198	0.0202885	0.0605699	0.0374796	19	CREBBP,ZFYVE16,LTBP1,RHOA,ROCK1,MAPK1,EP300,MAPK3,TGFB1,TGFBR1,PPP2CA,ACVR1,ROCK2,THBS1,SMAD4,TGFBR2,SP1,TFDP1,LEFTY1
REACTOME_PLATELET_HOMEOSTASIS	19/1792	86/13198	0.0202885	0.0605699	0.0374796	19	FGR,ATP2B4,PPP2R5A,PPP2R5B,ATP2B1,GNB1,P2RX1,MAPK14,PPP2CA,GNB4,GNG11,PDE5A,ORAI2,STIM1,GNB2,GNG5,SLC8A1,GNG2,PECAM1
WP_CHOLESTEROL_METABOLISM_INCLUDES_BOTH_BLOCH_AND_KANDUTSCHRUSSELL_PATHWAYS	12/1792	47/13198	0.0204661	0.0610194	0.0377578	12	MYLIP,ELOVL5,SOAT1,ACSL4,HMGCR,ACSL3,NR1H2,CYP27A1,LBR,ACSL1,ABCG1,ABCA1
REACTOME_SIGNALING_BY_ERBB4	14/1792	58/13198	0.0209113	0.0622644	0.0385281	14	TAB2,ITCH,PSEN1,HBEGF,SPARC,EREG,KRAS,NCOR1,UBC,ADAM17,NRG1,NCSTN,GRB2,PSENEN
REACTOME_BETA_CATENIN_INDEPENDENT_WNT_SIGNALING	29/1792	146/13198	0.0213628	0.0635249	0.0393081	29	RHOA,GNB1,PSME1,AGO1,TNRC6B,PARD6A,GNB4,AGO2,AGO3,GNG11,RAC2,PSME3,KRAS,AGO4,RAC1,PPP3CA,CLTC,ARRB2,PLCB3,UBC,AP2M1,PRKCB,CTNNB1,GNB2,GNG5,PLCB1,GNG2,PSMB8,PSMB3
PID_BMP_PATHWAY	11/1792	42/13198	0.0215683	0.063883	0.0395297	11	ZFYVE16,TAB2,GSK3B,PPP1R15A,MAPK1,PPM1A,NUP214,SMAD4,CTDSPL,SKI,CTDSP2
REACTOME_COOPERATION_OF_PDCL_PHLP1_AND_TRIC_CCT_IN_G_PROTEIN_BETA_FOLDING	11/1792	42/13198	0.0215683	0.063883	0.0395297	11	GNAI3,GNB1,GNAI2,GNB4,GNG11,GNAZ,CCT5,GNB2,GNG5,RGS6,GNG2
WP_TNF_RELATED_WEAK_INDUCER_OF_APOPTOSIS_TWEAK_SIGNALING_PATHWAY	11/1792	42/13198	0.0215683	0.063883	0.0395297	11	CASP8,GSK3B,MAPK1,MMP9,MAPK3,MAPK14,RAF1,RAC1,CTNNB1,RELA,JUN
PID_IL4_2PATHWAY	15/1792	64/13198	0.0222624	0.0658342	0.0407371	15	SPI1,JAK3,CBL,MAPK14,BCL6,ARG1,JAK1,STAT6,CEBPB,STAT5B,SELP,GRB2,SOCS3,SP1,ITGB3
BIOCARTA_AKT_PATHWAY	7/1792	22/13198	0.0224023	0.0658342	0.0407371	7	HSP90AA1,PIK3CG,PPP2CA,FOXO3,YWHAH,RELA,FOXO4
BIOCARTA_CASPASE_PATHWAY	7/1792	22/13198	0.0224023	0.0658342	0.0407371	7	CASP8,ARHGDIB,LMNB1,APAF1,CASP1,LMNA,CASP4
REACTOME_CHAPERONE_MEDIATED_AUTOPHAGY	7/1792	22/13198	0.0224023	0.0658342	0.0407371	7	LAMP2,VIM,HSP90AA1,HSP90AB1,PLIN3,HSPA8,UBC
REACTOME_COMMON_PATHWAY_OF_FIBRIN_CLOT_FORMATION	7/1792	22/13198	0.0224023	0.0658342	0.0407371	7	PF4V1,F13A1,PF4,THBD,PROS1,F5,CD177
REACTOME_SHC1_EVENTS_IN_ERBB2_SIGNALING	7/1792	22/13198	0.0224023	0.0658342	0.0407371	7	HBEGF,EREG,PTPN12,KRAS,NRG1,PRKCD,GRB2
PID_FRA_PATHWAY	10/1792	37/13198	0.022492	0.0658403	0.0407409	10	PLAUR,FOSL2,HMOX1,EP300,MMP9,JUND,JUNB,JUN,THBD,SP1
REACTOME_DETOXIFICATION_OF_REACTIVE_OXYGEN_SPECIES	10/1792	37/13198	0.022492	0.0658403	0.0407409	10	CYBA,NCF4,SOD2,NCF2,CAT,TXN,NCF1,ATP7A,ERO1A,GPX3
ST_ADRENERGIC	10/1792	37/13198	0.022492	0.0658403	0.0407409	10	PHKA2,MAPK1,ASAH1,MAPK14,RAF1,APC,GNAQ,BRAF,CAMP,PIK3CD
REACTOME_REGULATION_OF_PLK1_ACTIVITY_AT_G2_M_TRANSITION	19/1792	87/13198	0.0227583	0.0664472	0.0411164	19	PRKAR2B,PAFAH1B1,SDCCAG8,PPP1R12A,PRKACA,NDE1,PPP1R12B,HSP90AA1,HAUS4,MAPRE1,TUBA4A,ACTR1A,CSNK1D,UBC,RAB8A,TUBA1A,CEP63,TUBB4B,PPP1CB
WP_PATHWAYS_IN_CLEAR_CELL_RENAL_CELL_CARCINOMA	19/1792	87/13198	0.0227583	0.0664472	0.0411164	19	CREBBP,PKM,PGM1,EP300,HIF1A,PGK1,TGFB1,GRB10,GAPDH,TPI1,VEGFA,KCNJ2,LDHA,ARNT,ALDOA,HK1,HK3,STAT3,SETD2
REACTOME_ADVANCED_GLYCOSYLATION_ENDPRODUCT_RECEPTOR_SIGNALING	5/1792	13/13198	0.0229781	0.0665623	0.0411876	5	MAPK1,MAPK3,CAPZA1,S100A12,CAPZA2
REACTOME_P38MAPK_EVENTS	5/1792	13/13198	0.0229781	0.0665623	0.0411876	5	MAPK14,MAPKAPK3,KRAS,RALB,MAPKAPK2
REACTOME_SUPPRESSION_OF_PHAGOSOMAL_MATURATION	5/1792	13/13198	0.0229781	0.0665623	0.0411876	5	RAB7A,KPNB1,KPNA1,RAB5A,UBC
REACTOME_TNFR1_INDUCED_PROAPOPTOTIC_SIGNALING	5/1792	13/13198	0.0229781	0.0665623	0.0411876	5	CASP8,TNFRSF1A,CYLD,USP4,TNFAIP3
REACTOME_TRAFFICKING_AND_PROCESSING_OF_ENDOSOMAL_TLR	5/1792	13/13198	0.0229781	0.0665623	0.0411876	5	TLR8,CNPY3,CTSS,CTSB,TLR9
WP_NEUROINFLAMMATION	5/1792	13/13198	0.0229781	0.0665623	0.0411876	5	MAPK14,TLR4,FOS,RELA,JUN
REACTOME_SIGNALING_BY_NOTCH	45/1792	247/13198	0.0230229	0.0665623	0.0411876	45	CREBBP,SEL1L,ITCH,PSEN1,PSME1,AGO1,TNRC6B,EP300,HIF1A,JAG1,MIB1,TBL1X,TLE4,ST3GAL4,E2F3,KAT2B,CREB1,AGO2,AGO3,PSME3,NUMB,NOTCH2,AGO4,ARRB1,ADAM10,TLE3,FURIN,NCOR1,ARRB2,UBC,ADAM17,MAML1,NCSTN,HEY1,YWHAZ,RBPJ,TBL1XR1,JUN,PBX1,MAML3,TFDP1,WWP2,PSMB8,PSENEN,PSMB3
REACTOME_SEALING_OF_THE_NUCLEAR_ENVELOPE_NE_BY_ESCRT_III	9/1792	32/13198	0.0231006	0.0665623	0.0411876	9	TUBB1,CHMP3,TUBA1B,TUBA4A,CHMP2A,TUBA1A,IST1,TUBA8,TUBB4B
WP_TOLLLIKE_RECEPTOR_SIGNALING_RELATED_TO_MYD88	9/1792	32/13198	0.0231006	0.0665623	0.0411876	9	MAPK1,TLR8,TLR4,REL,RELA,TLR1,TBK1,TLR5,TLR9
PID_GLYPICAN_1PATHWAY	8/1792	27/13198	0.0231816	0.0665623	0.0411876	8	FGR,HCK,TGFB1,TGFBR1,VEGFA,NRG1,TGFBR2,LYN
REACTOME_GLYCOGEN_METABOLISM	8/1792	27/13198	0.0231816	0.0665623	0.0411876	8	PHKA2,PGM1,PYGL,PHKB,GBE1,UBC,GYG1,GAA
REACTOME_VEGFR2_MEDIATED_VASCULAR_PERMEABILITY	8/1792	27/13198	0.0231816	0.0665623	0.0411876	8	CTNNA1,HSP90AA1,RAC1,VAV1,PAK1,RICTOR,CTNNB1,PAK2
WP_FOLLICLE_STIMULATING_HORMONE_FSH_SIGNALING_PATHWAY	8/1792	27/13198	0.0231816	0.0665623	0.0411876	8	PRKACA,MAPK1,MAPK3,MAPK14,CREB1,SGK1,RAF1,GRK6
KEGG_LONG_TERM_DEPRESSION	16/1792	70/13198	0.0233617	0.066994	0.0414547	16	GNAI3,MAPK1,MAPK3,PPP2CA,GNAI2,GNA13,GNAZ,RAF1,KRAS,PLCB3,GNAQ,BRAF,PRKCB,MAP2K1,PLCB1,LYN
PID_AJDISS_2PATHWAY	12/1792	48/13198	0.0240189	0.0687038	0.0425127	12	CREBBP,CTNNA1,CDC42,RAB7A,DNM2,GNA13,RAC1,ADAM10,IQGAP1,RAB5A,CTNNB1,CDH2
REACTOME_G_ALPHA_Z_SIGNALLING_EVENTS	12/1792	48/13198	0.0240189	0.0687038	0.0425127	12	GNAI3,GNB1,GNAI2,GNB4,GNG11,GNAZ,ADCY4,PRKCD,PRKCB,GNB2,GNG5,GNG2
REACTOME_NRAGE_SIGNALS_DEATH_THROUGH_JNK	14/1792	59/13198	0.0240982	0.0688433	0.042599	14	SOS2,ECT2,ARHGEF2,GNA13,PREX1,ARHGEF6,ARHGEF11,RAC1,FGD4,VAV1,ABR,ARHGEF40,AKAP13,ITSN1
REACTOME_SELECTIVE_AUTOPHAGY	18/1792	82/13198	0.0249289	0.0711264	0.0440118	18	VIM,HSP90AA1,TUBB1,PLIN3,HSPA8,EPAS1,TUBA1B,TUBA4A,DYNC1LI2,MAP1LC3B,DYNC1LI1,UBC,PINK1,VCP,TUBA1A,TUBA8,TUBB4B,NBR1
PID_CD8_TCR_DOWNSTREAM_PATHWAY	15/1792	65/13198	0.0254245	0.0724486	0.04483	15	MAPK1,MAPK3,RAF1,KRAS,PPP3CA,IFNAR1,BRAF,IFNAR2,PRKCB,B2M,MAP2K1,FOS,JUNB,JUN,HLA-A
PID_INTEGRIN3_PATHWAY	11/1792	43/13198	0.0255344	0.0725784	0.0449102	11	ITGA2B,PLAUR,PVR,VEGFA,SPP1,TGFBI,THBS1,F11R,TGFBR2,ITGB3,PECAM1
REACTOME_GABA_B_RECEPTOR_ACTIVATION	11/1792	43/13198	0.0255344	0.0725784	0.0449102	11	GNAI3,GNB1,GNAI2,GNB4,KCNJ2,GNG11,ADCY4,KCNJ15,GNB2,GNG5,GNG2
REACTOME_MITOTIC_METAPHASE_AND_ANAPHASE	43/1792	236/13198	0.0257742	0.0731675	0.0452748	43	PAFAH1B1,WAPL,PPP2R5A,SIRT2,PPP2R5B,UBE2D1,NDE1,PDS5B,PSME1,TUBB1,MAPRE1,STAG2,KPNB1,NUP98,LMNB1,PPP2CA,CHMP3,STAG1,TUBA1B,B9D2,TUBA4A,CHMP2A,CLIP1,PSME3,DYNC1LI2,NUP58,LBR,DYNC1LI1,UBC,AHCTF1,TAOK1,LMNA,RAD21,NDEL1,TUBA1A,CDC26,RCC1,IST1,TUBA8,TUBB4B,PSMB8,PPP2R2A,PSMB3
KEGG_INOSITOL_PHOSPHATE_METABOLISM	13/1792	54/13198	0.0260208	0.0737747	0.0456505	13	PIK3CB,PIK3C3,ITPK1,PIK3CG,TPI1,PIKFYVE,PLCB3,IPMK,SYNJ1,INPPL1,PIK3CD,PLCB1,PLCG2
PID_FAS_PATHWAY	10/1792	38/13198	0.0269227	0.0755548	0.046752	10	CFLAR,BTK,BID,PIK3CB,CASP8,MAP3K1,MAPK14,CLTC,SYK,PIK3CD
WP_AMYOTROPHIC_LATERAL_SCLEROSIS_ALS	10/1792	38/13198	0.0269227	0.0755548	0.046752	10	BID,TNFRSF1A,MAPK14,APAF1,CAT,RAC1,CASP1,PPP3CA,RAB5A,MAP3K5
BIOCARTA_MEF2D_PATHWAY	6/1792	18/13198	0.0269503	0.0755548	0.046752	6	EP300,MEF2D,PPP3CA,CALM2,CALM3,PRKCB
BIOCARTA_MTA3_PATHWAY	6/1792	18/13198	0.0269503	0.0755548	0.046752	6	HSPB1,GAPDH,CTSD,TUBA4A,ALDOA,TUBA1A
BIOCARTA_PTEN_PATHWAY	6/1792	18/13198	0.0269503	0.0755548	0.046752	6	MAPK1,MAPK3,CDKN1B,FOXO3,ILK,GRB2
REACTOME_SIGNALING_BY_CYTOSOLIC_FGFR1_FUSION_MUTANTS	6/1792	18/13198	0.0269503	0.0755548	0.046752	6	GAB2,LRRFIP1,STAT3,STAT5B,GRB2,CUX1
WP_REGULATION_OF_WNTBCATENIN_SIGNALING_BY_SMALL_MOLECULE_COMPOUNDS	6/1792	18/13198	0.0269503	0.0755548	0.046752	6	GSK3B,CSNK1A1,LRP1,APC,CTNNB1,MBOAT1
WP_TGFB_SIGNALING_IN_THYROID_CELLS_FOR_EPITHELIALMESENCHYMAL_TRANSITION	6/1792	18/13198	0.0269503	0.0755548	0.046752	6	VIM,MAPK1,MAPK3,TGFB1,SMAD4,CDH2
WP_TRANSCRIPTION_COFACTORS_SKI_AND_SKIL_PROTEIN_PARTNERS	6/1792	18/13198	0.0269503	0.0755548	0.046752	6	PRMT5,SKIL,LATS2,SKI,ING2,NF1
KEGG_JAK_STAT_SIGNALING_PATHWAY	30/1792	155/13198	0.0271105	0.0759094	0.0469714	30	CREBBP,IFNGR1,PIAS1,PIK3CB,IL12RB2,OSM,CSF2RB,EP300,SOS2,JAK3,PIK3CG,CBL,STAM2,STAM,PIK3R5,IFNAR1,IFNAR2,IFNGR2,IL6R,JAK1,STAT6,STAT3,SPRY3,STAT2,PIK3CD,STAT5B,GRB2,SOCS3,CSF2RA,IL10RB
KEGG_GLYCEROPHOSPHOLIPID_METABOLISM	17/1792	77/13198	0.027304	0.0763562	0.0472479	17	AGPAT4,DGKG,PGS1,LPCAT2,CDS2,LPCAT3,LPGAT1,MBOAT7,GPAT3,MBOAT2,LPCAT1,PCYT1A,AGPAT2,MBOAT1,PHOSPHO1,AGPAT1,PISD
KEGG_GLYCEROLIPID_METABOLISM	12/1792	49/13198	0.028004	0.0782168	0.0483992	12	AGPAT4,DGKG,DGAT2,GLA,ALDH2,GPAT3,MBOAT2,AGPAT2,MBOAT1,DGAT1,GK,AGPAT1
REACTOME_CD28_CO_STIMULATION	9/1792	33/13198	0.02805	0.0782483	0.0484187	9	CDC42,CD86,RAC1,VAV1,PAK1,RICTOR,GRB2,PAK2,LYN
REACTOME_SPHINGOLIPID_METABOLISM	19/1792	89/13198	0.0283789	0.0790681	0.048926	19	HEXB,CTSA,GBA2,SPTLC1,SPTLC2,VAPA,GLA,ASAH1,ARSB,CERS2,DEGS1,SAMD8,SGMS2,GLB1,GBA,GM2A,PSAP,SGMS1,NEU1
REACTOME_ACTIVATED_TAK1_MEDIATES_P38_MAPK_ACTIVATION	7/1792	23/13198	0.0285299	0.0793907	0.0491256	7	TAB2,RIPK2,MAPK14,MAPKAPK3,UBC,MAPKAPK2,NOD2
PID_TCR_CALCIUM_PATHWAY	8/1792	28/13198	0.0287022	0.0796734	0.0493006	8	PRKACA,PTGS2,FKBP1A,PPP3CA,FOS,JUNB,JUN,CHP1
REACTOME_SYNTHESIS_OF_PC	8/1792	28/13198	0.0287022	0.0796734	0.0493006	8	LPIN2,SLC44A2,PCTP,LPCAT1,ABHD3,PCYT1A,PHOSPHO1,STARD10
REACTOME_SIGNALING_BY_HEDGEHOG	29/1792	150/13198	0.029805	0.0826328	0.0511317	29	PRKAR2B,CUL3,SEL1L,PRKACA,ITCH,GSK3B,PSME1,TUBB1,PRKAR1A,CSNK1A1,PRKAR2A,SPOP,TUBA1B,TUBA4A,ADCY4,PSME3,NUMB,CDC73,OS9,ARRB1,ARRB2,SPOPL,UBC,ADAM17,VCP,TUBA1A,TUBB4B,PSMB8,PSMB3
REACTOME_GLYCOLYSIS	16/1792	72/13198	0.0299	0.0827738	0.051219	16	PKM,PRKACA,NUP50,PGK1,NUP98,GAPDH,TPI1,PPP2CA,PFKFB4,NUP214,NUP58,ALDOA,HK1,HK3,PFKFB3,PGAM1
KEGG_VASOPRESSIN_REGULATED_WATER_REABSORPTION	11/1792	44/13198	0.0300028	0.0827738	0.051219	11	PRKACA,RAB11A,RAB5C,ARHGDIB,RAB5B,CREB1,DCTN4,DYNC1LI2,RAB5A,DYNC1LI1,CREB5
PID_HNF3A_PATHWAY	11/1792	44/13198	0.0300028	0.0827738	0.051219	11	CREBBP,EP300,CDKN1B,NCOA3,NKX3-1,FOS,CEBPB,JUN,SP1,SERPINA1,PISD
REACTOME_INTRA_GOLGI_TRAFFIC	11/1792	44/13198	0.0300028	0.0827738	0.051219	11	CYTH3,CYTH2,RIC1,MAN1A1,STX16,STX6,ARF1,VTI1A,STX5,RAB33B,CUX1
REACTOME_CELL_SURFACE_INTERACTIONS_AT_THE_VASCULAR_WALL	36/1792	194/13198	0.0303172	0.0835392	0.0516926	36	CD44,PIK3CB,ATP1B3,CEACAM1,GP6,TGFB1,PF4V1,SELPLG,TEK,TNFRSF10B,TREM1,KRAS,SLC16A3,ESAM,ANGPT1,SLC7A7,F11R,FCER1G,ITGB2,JAML,ITGA5,SDC3,PF4,INPP5D,ITGAM,CEACAM3,SELP,GRB2,THBD,PROS1,SELL,SIRPA,CD177,LYN,ITGB3,PECAM1
REACTOME_RESOLUTION_OF_SISTER_CHROMATID_COHESION	25/1792	126/13198	0.0312866	0.0861049	0.0532803	25	PAFAH1B1,WAPL,PPP2R5A,PPP2R5B,NDE1,PDS5B,TUBB1,MAPRE1,STAG2,NUP98,PPP2CA,STAG1,TUBA1B,B9D2,TUBA4A,CLIP1,DYNC1LI2,DYNC1LI1,AHCTF1,TAOK1,RAD21,NDEL1,TUBA1A,TUBA8,TUBB4B
REACTOME_TRANSCRIPTIONAL_REGULATION_BY_RUNX3	20/1792	96/13198	0.0317678	0.0866156	0.0535963	20	CREBBP,PSME1,EP300,JAG1,TGFB1,KAT2B,FOXO3,SPP1,CDKN1A,PSME3,KRAS,MDM2,SMAD4,UBC,MAML1,CTNNB1,RBPJ,MAML3,PSMB8,PSMB3
BIOCARTA_MHC_PATHWAY	5/1792	14/13198	0.031835	0.0866156	0.0535963	5	B2M,TAP1,PSMB8,TAP2,HLA-A
PID_IL5_PATHWAY	5/1792	14/13198	0.031835	0.0866156	0.0535963	5	CSF2RB,SDCBP,STAT5B,GRB2,LYN
REACTOME_AKT_PHOSPHORYLATES_TARGETS_IN_THE_CYTOSOL	5/1792	14/13198	0.031835	0.0866156	0.0535963	5	GSK3B,CDKN1B,CDKN1A,MKRN1,MDM2
REACTOME_ERYTHROPOIETIN_ACTIVATES_RAS	5/1792	14/13198	0.031835	0.0866156	0.0535963	5	CRKL,KRAS,VAV1,GRB2,LYN
REACTOME_REGULATION_OF_IFNG_SIGNALING	5/1792	14/13198	0.031835	0.0866156	0.0535963	5	IFNGR1,PIAS1,IFNGR2,JAK1,SOCS3
REACTOME_SHC1_EVENTS_IN_EGFR_SIGNALING	5/1792	14/13198	0.031835	0.0866156	0.0535963	5	HBEGF,EREG,KRAS,TGFA,GRB2
REACTOME_SHC1_EVENTS_IN_ERBB4_SIGNALING	5/1792	14/13198	0.031835	0.0866156	0.0535963	5	HBEGF,EREG,KRAS,NRG1,GRB2
WP_CANCER_IMMUNOTHERAPY_BY_CTLA4_BLOCKADE	5/1792	14/13198	0.031835	0.0866156	0.0535963	5	PIK3CB,PPP2CA,CD86,CTLA4,PIK3CD
REACTOME_PROTEIN_FOLDING	21/1792	102/13198	0.0318564	0.0866156	0.0535963	21	GNAI3,GNB1,TUBB1,GNAI2,GNB4,FBXL5,TUBA1B,TUBA4A,GNG11,GNAZ,KIF13A,CCT5,TUBA1A,STAT3,GNB2,GNG5,GBA,RGS6,TUBA8,GNG2,TUBB4B
KEGG_SPHINGOLIPID_METABOLISM	10/1792	39/13198	0.0319422	0.0867441	0.0536758	10	SPTLC1,SPTLC2,GLA,ASAH1,DEGS1,SGMS2,GLB1,GBA,SGMS1,NEU1
REACTOME_METABOLISM_OF_STEROIDS	29/1792	151/13198	0.0322692	0.0875269	0.0541601	29	NFYA,CREBBP,STARD3NL,NFYC,SMARCD3,NCOA1,TSPO,SEC23A,TBL1X,KPNB1,ABCC3,VDR,HMGCR,OSBPL9,OSBPL2,HSD17B4,CYP27A1,NCOA2,OSBPL1A,LBR,HSD17B12,SEC24D,TBL1XR1,SP1,RXRA,MTF1,HSD17B11,NCOA6,AMACR
WP_EPITHELIAL_TO_MESENCHYMAL_TRANSITION_IN_COLORECTAL_CANCER	31/1792	164/13198	0.0336231	0.0906602	0.056099	31	PIK3CB,MAP2K4,GSK3B,MAPK1,SOS2,HIF1A,MMP9,JAG1,MAPK3,TGFB1,TGFBR1,MAPK14,SPARC,MEF2D,RAF1,KRAS,NOTCH2,SMAD4,PAK1,LATS2,ITGA5,TGFBR2,CTNNB1,RBPJ,MAP2K1,ZEB2,CDH2,PIK3CD,NR2C2,GRB2,CLDN5
PID_IL2_PI3K_PATHWAY	9/1792	34/13198	0.0336984	0.0906602	0.056099	9	GAB2,HSP90AA1,JAK3,FOXO3,RAC1,JAK1,RELA,GRB2,SGMS1
REACTOME_KERATAN_SULFATE_KERATIN_METABOLISM	9/1792	34/13198	0.0336984	0.0906602	0.056099	9	HEXB,ST3GAL4,GNS,GALNS,B3GNT7,ST3GAL2,B4GALT5,GLB1,B3GNT2
REACTOME_SIGNALING_BY_WNT_IN_CANCER	9/1792	34/13198	0.0336984	0.0906602	0.056099	9	PPP2R5A,PPP2R5B,GSK3B,PPP2CA,CSNK1A1,APC,CTNNB1,CTBP2,KREMEN1
REACTOME_SYNTHESIS_OF_BILE_ACIDS_AND_BILE_SALTS	9/1792	34/13198	0.0336984	0.0906602	0.056099	9	NCOA1,OSBPL9,OSBPL2,HSD17B4,CYP27A1,NCOA2,OSBPL1A,RXRA,AMACR
WP_OXIDATIVE_STRESS	9/1792	34/13198	0.0336984	0.0906602	0.056099	9	HMOX1,MAPK14,SOD2,NFE2L2,CAT,FOS,JUNB,SP1,GPX3
KEGG_CELL_ADHESION_MOLECULES_CAMS	26/1792	133/13198	0.033706	0.0906602	0.056099	26	VCAN,PVR,ICAM3,PTPRC,NECTIN1,SELPLG,CD86,CD274,NECTIN2,ESAM,F11R,MPZ,ITGB2,SDC3,CTLA4,ITGAM,CDH2,SELP,CLDN5,SELL,MPZL1,HLA-C,HLA-E,HLA-A,HLA-B,PECAM1
PID_P73PATHWAY	17/1792	79/13198	0.0342845	0.0915858	0.0566718	17	BAK1,GRAMD4,ITCH,EP300,MAPK14,FOXO3,CDKN1A,UBE4B,FLOT2,MDM2,JAK1,TUBA1A,RELA,PLK3,SP1,IL1RAP,SERPINA1
REACTOME_SIGNALING_BY_MET	17/1792	79/13198	0.0342845	0.0915858	0.0566718	17	CRKL,GAB1,CBL,STAM2,RAP1A,KRAS,RAC1,STAM,USP8,SH3KBP1,PTPRJ,UBC,SPINT1,CRK,STAT3,PTK2,GRB2
REACTOME_DEGRADATION_OF_BETA_CATENIN_BY_THE_DESTRUCTION_COMPLEX	18/1792	85/13198	0.0347226	0.0915858	0.0566718	18	ZRANB1,PPP2R5A,PPP2R5B,GSK3B,PSME1,TLE4,PPP2CA,CSNK1A1,PSME3,APC,TLE3,UBC,FRAT1,CTNNB1,CTBP2,FRAT2,PSMB8,PSMB3
BIOCARTA_TOB1_PATHWAY	6/1792	19/13198	0.0349857	0.0915858	0.0566718	6	TGFB1,TGFBR1,TOB1,SMAD4,TGFBR2,TOB2
PID_ARF_3PATHWAY	6/1792	19/13198	0.0349857	0.0915858	0.0566718	6	CYTH2,COPA,RAC1,ARF1,ASAP1,AP2M1
REACTOME_CONSTITUTIVE_SIGNALING_BY_LIGAND_RESPONSIVE_EGFR_CANCER_VARIANTS	6/1792	19/13198	0.0349857	0.0915858	0.0566718	6	HSP90AA1,GAB1,CBL,KRAS,UBC,GRB2
REACTOME_EPHRIN_SIGNALING	6/1792	19/13198	0.0349857	0.0915858	0.0566718	6	MYL12A,RAC1,SDCBP,PAK1,PAK2,EPHB4
REACTOME_OTHER_SEMAPHORIN_INTERACTIONS	6/1792	19/13198	0.0349857	0.0915858	0.0566718	6	TYROBP,PLXNA2,PTPRC,PLXNC1,SEMA4D,SEMA4A
REACTOME_PROSTACYCLIN_SIGNALLING_THROUGH_PROSTACYCLIN_RECEPTOR	6/1792	19/13198	0.0349857	0.0915858	0.0566718	6	GNB1,GNB4,GNG11,GNB2,GNG5,GNG2
REACTOME_REGULATION_OF_TLR_BY_ENDOGENOUS_LIGAND	6/1792	19/13198	0.0349857	0.0915858	0.0566718	6	TLR4,S100A8,LY96,S100A9,CD14,TLR1
WP_APOPTOSIS_MODULATION_BY_HSP70	6/1792	19/13198	0.0349857	0.0915858	0.0566718	6	BID,CASP8,TNFRSF1A,MAP3K1,APAF1,HSPA1A
WP_PROTEOGLYCAN_BIOSYNTHESIS	6/1792	19/13198	0.0349857	0.0915858	0.0566718	6	EXTL3,XYLT1,CHSY1,CANT1,EXT1,PAPSS2
WP_SIMPLIFIED_DEPICTION_OF_MYD88_DISTINCT_INPUTOUTPUT_PATHWAY	6/1792	19/13198	0.0349857	0.0915858	0.0566718	6	TLR8,TLR4,TLR1,JUN,TLR5,TLR9
REACTOME_GLYCOSPHINGOLIPID_METABOLISM	11/1792	45/13198	0.0350024	0.0915858	0.0566718	11	HEXB,CTSA,GBA2,GLA,ASAH1,ARSB,GLB1,GBA,GM2A,PSAP,NEU1
WP_GLYCOLYSIS_AND_GLUCONEOGENESIS	11/1792	45/13198	0.0350024	0.0915858	0.0566718	11	SLC2A3,PKM,PGK1,GAPDH,TPI1,LDHA,ALDOA,HK1,HK3,FBP1,PGAM1
PID_INTEGRIN2_PATHWAY	8/1792	29/13198	0.0350659	0.0915858	0.0566718	8	PLAUR,ICAM3,TGFBI,FCGR2A,F11R,ITGB2,ITGAM,GP1BA
REACTOME_ACTIVATION_OF_AMPK_DOWNSTREAM_OF_NMDARS	8/1792	29/13198	0.0350659	0.0915858	0.0566718	8	TUBB1,CAMKK2,TUBA1B,TUBA4A,PRKAA1,TUBA1A,TUBA8,TUBB4B
REACTOME_DOWNREGULATION_OF_ERBB2_SIGNALING	8/1792	29/13198	0.0350659	0.0915858	0.0566718	8	HSP90AA1,HBEGF,EREG,PTPN12,USP8,UBC,NRG1,RNF41
REACTOME_DOWNSTREAM_SIGNAL_TRANSDUCTION	8/1792	29/13198	0.0350659	0.0915858	0.0566718	8	PIK3CB,CRKL,KRAS,STAT6,CRK,STAT3,STAT5B,GRB2
REACTOME_ENERGY_DEPENDENT_REGULATION_OF_MTOR_BY_LKB1_AMPK	8/1792	29/13198	0.0350659	0.0915858	0.0566718	8	RRAGD,PPM1A,LAMTOR3,PRKAA1,LAMTOR5,CAB39,LAMTOR1,LAMTOR4
REACTOME_EPHA_MEDIATED_GROWTH_CONE_COLLAPSE	8/1792	29/13198	0.0350659	0.0915858	0.0566718	8	RHOA,ROCK1,MYL6,MYH9,MYL9,MYL12B,ROCK2,LYN
REACTOME_MYOGENESIS	8/1792	29/13198	0.0350659	0.0915858	0.0566718	8	SPAG9,CTNNA1,CDC42,MAPK14,MEF2D,BNIP2,CTNNB1,CDH2
WP_CANNABINOID_RECEPTOR_SIGNALING	8/1792	29/13198	0.0350659	0.0915858	0.0566718	8	PRKAR2B,PRKACA,MAPK1,MAPK3,AHR,PRKAR1A,MAPK14,DAGLB
WP_PHOTODYNAMIC_THERAPYINDUCED_UNFOLDED_PROTEIN_RESPONSE	8/1792	29/13198	0.0350659	0.0915858	0.0566718	8	HSPA5,PPP1R15A,DNAJC3,NFE2L2,ATF6,ATF3,DDIT3,ERN1
WP_SELECTIVE_EXPRESSION_OF_CHEMOKINE_RECEPTORS_DURING_TCELL_POLARIZATION	8/1792	29/13198	0.0350659	0.0915858	0.0566718	8	IFNGR1,IL12RB2,TGFB1,IL18R1,CCR2,IFNGR2,CCR1,CCR4
BIOCARTA_EIF4_PATHWAY	7/1792	24/13198	0.035697	0.0922719	0.0570963	7	EIF4G3,MAPK1,MAPK3,EIF4G2,MAPK14,EIF4A2,PRKCB
BIOCARTA_G2_PATHWAY	7/1792	24/13198	0.035697	0.0922719	0.0570963	7	EP300,RPS6KA1,CDKN1A,YWHAH,CDKN2D,MDM2,PRKDC
BIOCARTA_TFF_PATHWAY	7/1792	24/13198	0.035697	0.0922719	0.0570963	7	RHOA,MAPK1,MAPK3,PIK3CG,APAF1,CTNNB1,GRB2
BIOCARTA_VDR_PATHWAY	7/1792	24/13198	0.035697	0.0922719	0.0570963	7	CREBBP,NCOA1,EP300,VDR,KAT2B,NCOR1,RXRA
BIOCARTA_WNT_PATHWAY	7/1792	24/13198	0.035697	0.0922719	0.0570963	7	CREBBP,GSK3B,PPP2CA,APC,SMAD4,FRAT1,CTNNB1
REACTOME_DISEASES_OF_IMMUNE_SYSTEM	7/1792	24/13198	0.035697	0.0922719	0.0570963	7	BTK,TLR4,LY96,CD14,RELA,TLR1,TLR5
REACTOME_DISEASES_OF_PROGRAMMED_CELL_DEATH	7/1792	24/13198	0.035697	0.0922719	0.0570963	7	CAPN1,SOD2,LMNB1,FOXO3,CAST,LMNA,JUN
REACTOME_GROWTH_HORMONE_RECEPTOR_SIGNALING	7/1792	24/13198	0.035697	0.0922719	0.0570963	7	MAPK1,MAPK3,ADAM17,STAT3,STAT5B,SOCS3,LYN
WP_SPHINGOLIPID_METABOLISM_GENERAL_OVERVIEW	7/1792	24/13198	0.035697	0.0922719	0.0570963	7	SPTLC1,SPTLC2,ASAH1,CERS2,DEGS1,SGMS2,SGMS1
REACTOME_RHO_GTPASES_ACTIVATE_FORMINS	27/1792	140/13198	0.036066	0.0923289	0.0571315	27	PAFAH1B1,PPP2R5A,RHOA,PPP2R5B,CDC42,NDE1,TUBB1,MAPRE1,NUP98,PPP2CA,TUBA1B,B9D2,TUBA4A,CLIP1,DIAPH1,DYNC1LI2,RAC1,RHOB,DYNC1LI1,AHCTF1,TAOK1,NDEL1,TUBA1A,TUBA8,FMNL1,TUBB4B,SRGAP2
REACTOME_ACETYLCHOLINE_REGULATES_INSULIN_SECRETION	4/1792	10/13198	0.0360877	0.0923289	0.0571315	4	PLCB3,GNAQ,PLCB1,MARCKS
REACTOME_AKT_PHOSPHORYLATES_TARGETS_IN_THE_NUCLEUS	4/1792	10/13198	0.0360877	0.0923289	0.0571315	4	CREB1,FOXO3,NR4A1,FOXO4
REACTOME_INTERLEUKIN_21_SIGNALING	4/1792	10/13198	0.0360877	0.0923289	0.0571315	4	JAK3,JAK1,STAT3,STAT5B
REACTOME_MAPK3_ERK1_ACTIVATION	4/1792	10/13198	0.0360877	0.0923289	0.0571315	4	MAPK3,IL6R,JAK1,MAP2K1
REACTOME_MET_RECEPTOR_RECYCLING	4/1792	10/13198	0.0360877	0.0923289	0.0571315	4	CRKL,GAB1,CRK,GRB2
REACTOME_SIGNAL_ATTENUATION	4/1792	10/13198	0.0360877	0.0923289	0.0571315	4	MAPK1,MAPK3,GRB10,GRB2
WP_ETHANOL_METABOLISM_RESULTING_IN_PRODUCTION_OF_ROS_BY_CYP2E1	4/1792	10/13198	0.0360877	0.0923289	0.0571315	4	NFE2L2,MAP2K1,SP1,MAFG
WP_MAMMARY_GLAND_DEVELOPMENT_PATHWAY_INVOLUTION_STAGE_4_OF_4	4/1792	10/13198	0.0360877	0.0923289	0.0571315	4	MMP9,CHI3L1,STAT3,SOCS3
REACTOME_SIGNALING_BY_FGFR3	10/1792	40/13198	0.0375838	0.0958303	0.0592981	10	MAPK1,MAPK3,GAB1,CBL,PPP2CA,GALNT3,KRAS,UBC,BRAF,GRB2
WP_THE_INFLUENCE_OF_LAMINOPATHIES_ON_WNT_SIGNALING	10/1792	40/13198	0.0375838	0.0958303	0.0592981	10	GSK3B,DICER1,CSNK1A1,SPP1,AGO2,APC,LMNA,CTNNB1,CEBPB,CEBPD
WP_VITAMIN_DSENSITIVE_CALCIUM_SIGNALING_IN_DEPRESSION	10/1792	40/13198	0.0375838	0.0958303	0.0592981	10	ATP2B4,ATP2B1,VDR,KDM3A,NFE2L2,KDM6B,CYP27A1,G6PD,SLC8A1,RXRA
REACTOME_TP53_REGULATES_METABOLIC_GENES	18/1792	86/13198	0.0385434	0.0981659	0.0607434	18	RRAGD,RRM2B,AGO1,TNRC6B,LAMTOR3,AGO2,AGO3,YWHAH,SESN2,PRKAA1,LAMTOR5,AGO4,TXN,LAMTOR1,G6PD,YWHAZ,YWHAB,LAMTOR4
REACTOME_UNFOLDED_PROTEIN_RESPONSE_UPR_	19/1792	92/13198	0.0386804	0.0984036	0.0608905	19	NFYA,EXTL3,HSPA5,NFYC,PPP2R5B,DNAJC3,ATF6,TLN1,HDGF,ATP6V0D1,LMNA,ATF3,CREBRF,TPP1,CEBPB,DCP2,DDIT3,CTDSP2,ERN1
KEGG_ALZHEIMERS_DISEASE	31/1792	166/13198	0.0389386	0.0989489	0.0612279	31	CAPN1,BID,CASP8,TNFRSF1A,PSEN1,GSK3B,MAPK1,MAPK3,GAPDH,SDHB,ATF6,NDUFB3,APAF1,LRP1,NDUFA1,IL1B,ADAM10,PPP3CA,SDHC,CALM2,PLCB3,ADAM17,GNAQ,CALM3,NCSTN,ERN1,PLCB1,BACE1,CHP1,MME,PSENEN
REACTOME_TRANSMISSION_ACROSS_CHEMICAL_SYNAPSES	47/1792	269/13198	0.0397612	0.100925	0.0624509	47	PRKAR2B,SYN1,GNAI3,PRKACA,GNB1,MAPK1,PPM1F,DNAJC5,TUBB1,MAPK3,PRKAR1A,HSPA8,CAMKK2,LIN7A,SLC6A12,ALDH2,PRKAR2A,GNAI2,GNB4,RPS6KA1,CREB1,TUBA1B,KCNJ2,TUBA4A,GNG11,ADCY4,PPFIA1,PRKAA1,KRAS,MDM2,GLUL,RAC1,PLCB3,NRGN,NPTN,NRG1,KCNJ15,AP2M1,PRKCB,TUBA1A,GNB2,GNG5,PLCB1,ABAT,TUBA8,GNG2,TUBB4B
SIG_REGULATION_OF_THE_ACTIN_CYTOSKELETON_BY_RHO_GTPASES	9/1792	35/13198	0.0400843	0.101517	0.0628169	9	MYLK,ROCK1,CDC42,ACTR3,VASP,ROCK2,ACTR2,PAK1,PAK2
WP_ALPHA_6_BETA_4_SIGNALING_PATHWAY	9/1792	35/13198	0.0400843	0.101517	0.0628169	9	RHOA,MAPK1,MAPK3,GAB1,MAPK14,RAC1,PRKCD,PTK2,GRB2
REACTOME_HIV_INFECTION	41/1792	231/13198	0.0419593	0.105519	0.0652933	41	POLR2J,TSG101,XRCC5,CHMP5,CCNK,PSME1,NUP50,HCK,POLR2C,ELL,KPNB1,NUP98,KPNA1,CHMP3,VPS4B,TAF12,NUP214,CHMP2A,PSME3,DOCK2,RAC1,GTF2B,NUP58,VPS37B,FURIN,ARF1,UBC,ELMO1,VPS37A,AP2M1,UBAP1,B2M,VPS37C,LIG4,RCC1,PAK2,AP1S2,PSMB8,HLA-A,SUPT4H1,PSMB3
REACTOME_CELLULAR_RESPONSE_TO_HYPOXIA	16/1792	75/13198	0.0421076	0.105519	0.0652933	16	CREBBP,UBE2D1,PSME1,EP300,HIF1A,UBE2D3,VEGFA,EPAS1,PSME3,EGLN1,ARNT,UBC,HIF1AN,PSMB8,EGLN2,PSMB3
REACTOME_CONSTITUTIVE_SIGNALING_BY_ABERRANT_PI3K_IN_CANCER	16/1792	75/13198	0.0421076	0.105519	0.0652933	16	PIK3CB,GAB1,HBEGF,CD86,STRN,EREG,RAC2,KL,RAC1,VAV1,PIK3AP1,NRG1,TGFA,PIK3CD,RHOG,GRB2
KEGG_O_GLYCAN_BIOSYNTHESIS	8/1792	30/13198	0.042318	0.105519	0.0652933	8	C1GALT1,GALNT7,GALNT3,GALNT1,ST3GAL2,GALNT14,B4GALT5,GALNT10
PID_CDC42_REG_PATHWAY	8/1792	30/13198	0.042318	0.105519	0.0652933	8	RALBP1,CDC42,DNMBP,ARHGEF6,APC,SPATA13,ITSN2,ITSN1
PID_EPHRINB_REV_PATHWAY	8/1792	30/13198	0.042318	0.105519	0.0652933	8	FGR,ITGA2B,MAP2K4,HCK,RAC1,EPHB4,LYN,ITGB3
REACTOME_ACTIVATION_OF_KAINATE_RECEPTORS_UPON_GLUTAMATE_BINDING	8/1792	30/13198	0.042318	0.105519	0.0652933	8	GNB1,GNB4,GNG11,PLCB3,GNB2,GNG5,PLCB1,GNG2
WP_PATHWAYS_REGULATING_HIPPO_SIGNALING	20/1792	99/13198	0.0425046	0.105519	0.0652933	20	PRKAR2B,GNAI3,RHOA,CDC42,PRKACA,PRKAR1A,PRKAR2A,GNAI2,TEK,PRKAA1,RAC1,PLCB3,LATS2,GNAQ,PRKCD,PRKCB,CTNNB1,CDH2,CSF1R,PLCB1
BIOCARTA_RELA_PATHWAY	5/1792	15/13198	0.042554	0.105519	0.0652933	5	CREBBP,TNFRSF1B,TNFRSF1A,EP300,RELA
PID_ERBB_NETWORK_PATHWAY	5/1792	15/13198	0.042554	0.105519	0.0652933	5	HSP90AA1,HBEGF,EREG,NRG1,TGFA
REACTOME_CONSTITUTIVE_SIGNALING_BY_EGFRVIII	5/1792	15/13198	0.042554	0.105519	0.0652933	5	HSP90AA1,GAB1,CBL,KRAS,GRB2
REACTOME_DEPOLYMERISATION_OF_THE_NUCLEAR_LAMINA	5/1792	15/13198	0.042554	0.105519	0.0652933	5	LPIN2,LMNB1,LMNA,PRKCB,CNEP1R1
REACTOME_ERBB2_REGULATES_CELL_MOTILITY	5/1792	15/13198	0.042554	0.105519	0.0652933	5	RHOA,HBEGF,EREG,DIAPH1,NRG1
REACTOME_GLYCOGEN_BREAKDOWN_GLYCOGENOLYSIS_	5/1792	15/13198	0.042554	0.105519	0.0652933	5	PHKA2,PYGL,PHKB,GYG1,GAA
REACTOME_RESPONSE_OF_EIF2AK1_HRI_TO_HEME_DEFICIENCY	5/1792	15/13198	0.042554	0.105519	0.0652933	5	PPP1R15A,GRB10,ATF3,CEBPB,DDIT3
REACTOME_SIGNALING_BY_NOTCH1_HD_DOMAIN_MUTANTS_IN_CANCER	5/1792	15/13198	0.042554	0.105519	0.0652933	5	JAG1,MIB1,ADAM10,UBC,ADAM17
REACTOME_SYNTHESIS_OF_PROSTAGLANDINS_PG_AND_THROMBOXANES_TX_	5/1792	15/13198	0.042554	0.105519	0.0652933	5	TBXAS1,PTGS2,PTGS1,PTGES3,PTGES
SA_G1_AND_S_PHASES	5/1792	15/13198	0.042554	0.105519	0.0652933	5	CDKN1B,CDKN1A,ARF3,MDM2,ARF1
WP_OMEGA3OMEGA6_FA_SYNTHESIS	5/1792	15/13198	0.042554	0.105519	0.0652933	5	ELOVL5,ACSL4,ACSL3,ACSL1,ACOX1
REACTOME_REGULATION_OF_MRNA_STABILITY_BY_PROTEINS_THAT_BIND_AU_RICH_ELEMENTS	18/1792	87/13198	0.0426612	0.105669	0.0653859	18	PSME1,HSPB1,HSPA8,MAPK14,NUP214,ZFP36,PSME3,ANP32A,UBC,MAPKAPK2,PRKCD,YWHAZ,YWHAB,DCP2,ZFP36L1,PSMB8,HSPA1A,PSMB3
REACTOME_TRANSCRIPTIONAL_REGULATION_BY_VENTX	10/1792	41/13198	0.0438775	0.108405	0.0670791	10	UBE2D1,AGO1,TNRC6B,AGO3,AGO4,CTNNB1,CEBPB,RELA,CDC26,CSF1R
PID_MYC_PATHWAY	7/1792	25/13198	0.0439584	0.108405	0.0670791	7	PPP2R5A,GSK3B,HBP1,PPP2CA,TAF12,MAX,PAK2
REACTOME_MICRORNA_MIRNA_BIOGENESIS	7/1792	25/13198	0.0439584	0.108405	0.0670791	7	POLR2J,AGO1,DICER1,POLR2C,AGO2,AGO3,AGO4
WP_SPHINGOLIPID_METABOLISM_INTEGRATED_PATHWAY	7/1792	25/13198	0.0439584	0.108405	0.0670791	7	SPTLC1,SPTLC2,ASAH1,CERS2,DEGS1,SGMS2,SGMS1
BIOCARTA_GSK3_PATHWAY	6/1792	20/13198	0.044413	0.108812	0.0673309	6	EIF2AK2,GSK3B,PPP2CA,APC,CTNNB1,RELA
BIOCARTA_STATHMIN_PATHWAY	6/1792	20/13198	0.044413	0.108812	0.0673309	6	PRKAR2B,RB1CC1,HSPA5,TSG101,PRKAR1A,PRKAR2A
REACTOME_PKA_MEDIATED_PHOSPHORYLATION_OF_CREB	6/1792	20/13198	0.044413	0.108812	0.0673309	6	PRKAR2B,PRKACA,PRKAR1A,PRKAR2A,CREB1,ADCY4
REACTOME_RIPK1_MEDIATED_REGULATED_NECROSIS	6/1792	20/13198	0.044413	0.108812	0.0673309	6	CFLAR,CASP8,TNFRSF10B,TNFSF10,UBC,MLKL
REACTOME_SIGNALING_BY_NODAL	6/1792	20/13198	0.044413	0.108812	0.0673309	6	FOXO3,ACVR1B,PCSK6,FURIN,SMAD4,LEFTY1
REACTOME_SIGNALLING_TO_RAS	6/1792	20/13198	0.044413	0.108812	0.0673309	6	MAPK14,MAPKAPK3,KRAS,RALB,MAPKAPK2,GRB2
WP_PROTEASOME_DEGRADATION	14/1792	64/13198	0.0456206	0.111649	0.0690866	14	UBE2D1,PSME1,UBE2D3,UBE2B,UBA1,PSME3,UBC,RPN1,PSMB8,HLA-C,HLA-E,HLA-A,HLA-B,PSMB3
KEGG_CYTOKINE_CYTOKINE_RECEPTOR_INTERACTION	46/1792	265/13198	0.0457006	0.111724	0.0691327	46	IFNGR1,TNFRSF1B,RELT,TNFRSF1A,IL12RB2,OSM,CSF2RB,TNFSF13B,TGFB1,TGFBR1,PF4V1,LTBR,VEGFA,ACVR1,IL1R2,IL1R1,IL18R1,IL18RAP,TNFSF4,TNFRSF10B,CCR2,TNFSF10,IL1B,TNFSF14,ACVR1B,IFNAR1,IFNAR2,IFNGR2,IL6R,CXCL16,CXCR1,TGFBR2,CXCL5,PPBP,PF4,CXCL1,CCR1,TNFRSF10C,IL17RA,CXCR2,CSF1R,CCR4,IL1RAP,CSF2RA,PLEKHO2,IL10RB
WP_SUDDEN_INFANT_DEATH_SYNDROME_SIDS_SUSCEPTIBILITY_PATHWAYS	30/1792	162/13198	0.0459174	0.112132	0.0693854	30	NFYA,PRKAR2B,CREBBP,PRKACA,CREM,EP300,HIF1A,PRKAR1A,GAPDH,VEGFA,NR3C1,PRKAR2A,ECE1,CREB1,IL1B,YWHAH,BHLHE40,IL1RN,ALDOA,IL6R,YWHAZ,YWHAB,NKX3-1,CTNNB1,TPPP,CEBPB,SP3,JUN,SP1,PBX1
REACTOME_COPI_DEPENDENT_GOLGI_TO_ER_RETROGRADE_TRAFFIC	20/1792	100/13198	0.0466093	0.113698	0.0703546	20	KIF1B,KIF3C,TUBB1,COPA,TUBA1B,TUBA4A,KIF1C,ARF3,RAB1A,ARF1,KIF27,TUBA1A,ARF4,KIF5B,RAB1B,TUBA8,COPB2,TUBB4B,ARFGAP3,SEC22B
KEGG_TYPE_II_DIABETES_MELLITUS	11/1792	47/13198	0.0466998	0.113796	0.0704151	11	PIK3CB,PKM,MAPK1,MAPK3,PIK3CG,PIK3R5,HK1,HK3,PRKCD,PIK3CD,SOCS3
WP_ALZHEIMERS_DISEASE	28/1792	150/13198	0.0480325	0.116917	0.0723464	28	CAPN1,BID,VMP1,CASP8,TNFRSF1A,PSEN1,GSK3B,MAPK1,MAPK3,GAPDH,ATF6,APAF1,LRP1,IL1B,ADAM10,PPP3CA,CALM2,PLCB3,ADAM17,GNAQ,CALM3,NCSTN,ERN1,PLCB1,BACE1,CHP1,MME,PSENEN
KEGG_AMYOTROPHIC_LATERAL_SCLEROSIS_ALS	12/1792	53/13198	0.0487548	0.118292	0.0731972	12	BID,TNFRSF1B,TNFRSF1A,MAPK14,APAF1,CAT,RAC1,CASP1,PPP3CA,RAB5A,CHP1,MAP3K5
REACTOME_INTRINSIC_PATHWAY_FOR_APOPTOSIS	12/1792	53/13198	0.0487548	0.118292	0.0731972	12	BID,BAK1,CASP8,MAPK1,MAPK3,CARD8,APAF1,YWHAH,YWHAZ,YWHAB,STAT3,TFDP1
WP_WNT_SIGNALING_PATHWAY_NETPATH	12/1792	53/13198	0.0487548	0.118292	0.0731972	12	RHOA,GSK3B,MAPK1,CSNK1A1,TEK,APC,RAC1,ARRB2,CSNK1D,FRAT1,PRKCB,CTNNB1
WP_COMPLEMENT_AND_COAGULATION_CASCADES	13/1792	59/13198	0.0502018	0.121671	0.0752879	13	PLAUR,VWF,CD46,CLU,CLTC,SERPING1,THBD,PROS1,CD55,SERPINA1,C5AR1,F5,CR1
PID_AURORA_A_PATHWAY	8/1792	31/13198	0.0504958	0.121671	0.0752879	8	PRKACA,GSK3B,OAZ1,MDM2,TACC1,PAK1,NDEL1,TDRD7
PID_NEPHRIN_NEPH1_PATHWAY	8/1792	31/13198	0.0504958	0.121671	0.0752879	8	PIK3CB,MAP2K4,PARD6A,RAC1,ARRB2,PIK3CD,JUN,GRB2
REACTOME_TRANSCRIPTIONAL_REGULATION_OF_PLURIPOTENT_STEM_CELLS	8/1792	31/13198	0.0504958	0.121671	0.0752879	8	TSC22D1,EPAS1,KLF4,SMAD4,NR6A1,HHEX,STAT3,PBX1
BIOCARTA_AKAP13_PATHWAY	4/1792	11/13198	0.0507578	0.121671	0.0752879	4	PRKAR2B,RHOA,PRKAR2A,AKAP13
BIOCARTA_IL4_PATHWAY	4/1792	11/13198	0.0507578	0.121671	0.0752879	4	JAK3,JAK1,STAT6,GRB2
REACTOME_CONSTITUTIVE_SIGNALING_BY_OVEREXPRESSED_ERBB2	4/1792	11/13198	0.0507578	0.121671	0.0752879	4	HSP90AA1,PTPN12,KRAS,GRB2
REACTOME_PEXOPHAGY	4/1792	11/13198	0.0507578	0.121671	0.0752879	4	EPAS1,MAP1LC3B,UBC,NBR1
REACTOME_REGULATION_BY_C_FLIP	4/1792	11/13198	0.0507578	0.121671	0.0752879	4	CFLAR,CASP8,TNFRSF10B,TNFSF10
REACTOME_UPTAKE_AND_FUNCTION_OF_ANTHRAX_TOXINS	4/1792	11/13198	0.0507578	0.121671	0.0752879	4	MAP2K4,FURIN,ANTXR2,MAP2K1
ST_STAT3_PATHWAY	4/1792	11/13198	0.0507578	0.121671	0.0752879	4	JAK3,IL6R,JAK1,STAT3
KEGG_ALDOSTERONE_REGULATED_SODIUM_REABSORPTION	10/1792	42/13198	0.0508492	0.121671	0.0752879	10	PIK3CB,ATP1B3,MAPK1,MAPK3,PIK3CG,SGK1,KRAS,PIK3R5,PRKCB,PIK3CD
WP_COMMON_PATHWAYS_UNDERLYING_DRUG_ADDICTION	10/1792	42/13198	0.0508492	0.121671	0.0752879	10	PRKACA,MAPK1,MAPK3,RAP1A,CREB1,RAF1,CALM2,PRKCB,MAP2K1,PPP1CB
KEGG_MELANOGENESIS	20/1792	101/13198	0.0509912	0.121881	0.0754181	20	CREBBP,GNAI3,PRKACA,GSK3B,MAPK1,EP300,MAPK3,GNAI2,CREB1,ADCY4,RAF1,KRAS,CALM2,PLCB3,GNAQ,CALM3,PRKCB,CTNNB1,MAP2K1,PLCB1
WP_NRF2_PATHWAY	27/1792	145/13198	0.0528146	0.126106	0.0780323	27	SLC2A3,HSP90AA1,FTL,HSP90AB1,HMOX1,TGFB1,ABCC3,HBEGF,NFE2L2,FGF13,SLC6A6,DNAJB1,TXN,PGD,SLC39A1,NRG1,G6PD,TGFA,TGFBR2,FTH1,SLC2A14,RXRA,MAFG,SERPINA1,SLC5A3,HSPA1A,GPX3
BIOCARTA_NKT_PATHWAY	7/1792	26/13198	0.0533556	0.126327	0.0781691	7	IFNGR1,IL12RB2,TGFB1,IL18R1,IFNGR2,CCR1,CCR4
KEGG_GALACTOSE_METABOLISM	7/1792	26/13198	0.0533556	0.126327	0.0781691	7	PGM1,GLA,HK1,HK3,GLB1,GAA,MGAM
REACTOME_DOWNREGULATION_OF_TGF_BETA_RECEPTOR_SIGNALING	7/1792	26/13198	0.0533556	0.126327	0.0781691	7	PPP1R15A,TGFB1,TGFBR1,USP15,UBC,TGFBR2,PPP1CB
REACTOME_FORMATION_OF_TUBULIN_FOLDING_INTERMEDIATES_BY_CCT_TRIC	7/1792	26/13198	0.0533556	0.126327	0.0781691	7	TUBB1,TUBA1B,TUBA4A,CCT5,TUBA1A,TUBA8,TUBB4B
REACTOME_INTERLEUKIN_20_FAMILY_SIGNALING	7/1792	26/13198	0.0533556	0.126327	0.0781691	7	JAK3,JAK1,STAT3,STAT2,STAT5B,SOCS3,IL10RB
REACTOME_SYNTHESIS_OF_IP3_AND_IP4_IN_THE_CYTOSOL	7/1792	26/13198	0.0533556	0.126327	0.0781691	7	ITPK1,PLCB3,SYNJ1,INPPL1,INPP5D,PLCB1,PLCG2
WP_EICOSANOID_SYNTHESIS	7/1792	26/13198	0.0533556	0.126327	0.0781691	7	ALOX5,TBXAS1,PTGS2,PTGS1,ALOX12,ALOX5AP,PTGES
WP_SIGNAL_TRANSDUCTION_OF_S1P_RECEPTOR	7/1792	26/13198	0.0533556	0.126327	0.0781691	7	GNAI3,MAPK1,MAPK3,ASAH1,GNAI2,PLCB3,PLCB1
BIOCARTA_PITX2_PATHWAY	5/1792	16/13198	0.0551894	0.128851	0.079731	5	CREBBP,GSK3B,EP300,APC,CTNNB1
KEGG_OTHER_GLYCAN_DEGRADATION	5/1792	16/13198	0.0551894	0.128851	0.079731	5	HEXB,MANBA,GLB1,GBA,NEU1
KEGG_PANTOTHENATE_AND_COA_BIOSYNTHESIS	5/1792	16/13198	0.0551894	0.128851	0.079731	5	VNN1,VNN2,PANK2,PANK4,DPYD
REACTOME_DEFECTS_OF_CONTACT_ACTIVATION_SYSTEM_CAS_AND_KALLIKREIN_KININ_SYSTEM_KKS_	5/1792	16/13198	0.0551894	0.128851	0.079731	5	VWF,SERPING1,GP9,TPST1,GP1BA
REACTOME_GRB2_EVENTS_IN_ERBB2_SIGNALING	5/1792	16/13198	0.0551894	0.128851	0.079731	5	HBEGF,EREG,KRAS,NRG1,GRB2
REACTOME_PI3K_EVENTS_IN_ERBB2_SIGNALING	5/1792	16/13198	0.0551894	0.128851	0.079731	5	GAB1,HBEGF,EREG,NRG1,GRB2
REACTOME_REGULATION_OF_KIT_SIGNALING	5/1792	16/13198	0.0551894	0.128851	0.079731	5	CBL,SH2B3,SH2B2,GRB2,LYN
REACTOME_TRAF6_MEDIATED_INDUCTION_OF_TAK1_COMPLEX_WITHIN_TLR4_COMPLEX	5/1792	16/13198	0.0551894	0.128851	0.079731	5	TAB2,TLR4,UBC,LY96,CD14
REACTOME_CA_DEPENDENT_EVENTS	9/1792	37/13198	0.0551961	0.128851	0.079731	9	PRKAR2B,PRKACA,MAPK1,PRKAR1A,CAMKK2,PRKAR2A,CREB1,ADCY4,PRKCD
PID_TAP63_PATHWAY	12/1792	54/13198	0.0552503	0.128851	0.079731	12	ITCH,SMARCD3,EP300,DICER1,JAG1,HBP1,VDR,CDKN1A,FLOT2,MDM2,PRKCD,SP1
BIOCARTA_NFKB_PATHWAY	6/1792	21/13198	0.0552792	0.128851	0.079731	6	TNFRSF1B,TNFRSF1A,MAP3K1,IL1R1,TNFAIP3,RELA
PID_S1P_META_PATHWAY	6/1792	21/13198	0.0552792	0.128851	0.079731	6	GNAI3,GNAI2,GNA13,S1PR4,GNAZ,GNAQ
REACTOME_CTLA4_INHIBITORY_SIGNALING	6/1792	21/13198	0.0552792	0.128851	0.079731	6	PPP2R5A,PPP2R5B,PPP2CA,CD86,CTLA4,LYN
REACTOME_TRANSPORT_OF_CONNEXONS_TO_THE_PLASMA_MEMBRANE	6/1792	21/13198	0.0552792	0.128851	0.079731	6	TUBB1,TUBA1B,TUBA4A,TUBA1A,TUBA8,TUBB4B
REACTOME_VXPX_CARGO_TARGETING_TO_CILIUM	6/1792	21/13198	0.0552792	0.128851	0.079731	6	RAB11A,EXOC8,RAB3IP,ASAP1,RAB8A,ARF4
ST_FAS_SIGNALING_PATHWAY	14/1792	66/13198	0.0571565	0.13309	0.0823535	14	BTK,RALBP1,BAK1,CASP8,MAP2K4,ROCK1,MAP3K1,MAPK1,NFAT5,HSPB1,CSNK1A1,CD46,DEDD2,MAP3K5
REACTOME_L1CAM_INTERACTIONS	23/1792	121/13198	0.057484	0.133714	0.08274	23	ITGA2B,DNM2,MAPK1,TUBB1,MAPK3,HSPA8,RPS6KA1,TUBA1B,TUBA4A,NUMB,RAC1,SDCBP,CLTC,MSN,PAK1,AP2M1,ITGA5,TUBA1A,MAP2K1,TUBA8,TUBB4B,DNM3,ITGB3
REACTOME_BILE_ACID_AND_BILE_SALT_METABOLISM	10/1792	43/13198	0.0585203	0.135984	0.0841447	10	NCOA1,ABCC3,OSBPL9,OSBPL2,HSD17B4,CYP27A1,NCOA2,OSBPL1A,RXRA,AMACR
REACTOME_CELLULAR_SENESCENCE	35/1792	198/13198	0.0594209	0.137935	0.0853517	35	MAP2K4,MAP4K4,UBE2D1,AGO1,MAPK1,TNRC6B,MAPK3,ERF,CDKN1B,MAPK14,E2F3,LMNB1,MAPKAPK3,RPS6KA1,UBN1,CDKN1A,AGO3,CDKN2D,KDM6B,PHC2,AGO4,MDM2,TXN,UBC,ETS2,MAPKAPK2,STAT3,FOS,CEBPB,RELA,CDC26,JUN,SP1,MAP3K5,TFDP1
REACTOME_PERK_REGULATES_GENE_EXPRESSION	8/1792	32/13198	0.0596275	0.138272	0.0855604	8	NFYA,HSPA5,NFYC,ATF6,ATF3,CEBPB,DCP2,DDIT3
REACTOME_ANCHORING_OF_THE_BASAL_BODY_TO_THE_PLASMA_MEMBRANE	19/1792	97/13198	0.0615153	0.142503	0.0881785	19	PRKAR2B,MARK4,PAFAH1B1,SDCCAG8,PRKACA,NDE1,HSP90AA1,HAUS4,MAPRE1,RAB11A,B9D2,RAB3IP,TUBA4A,ACTR1A,CSNK1D,RAB8A,TUBA1A,CEP63,TUBB4B
REACTOME_TRANSCRIPTIONAL_ACTIVATION_OF_MITOCHONDRIAL_BIOGENESIS	12/1792	55/13198	0.0623027	0.144179	0.0892155	12	CREBBP,SMARCD3,NCOA1,TBL1X,SOD2,MEF2D,CREB1,NCOA2,NCOR1,TBL1XR1,RXRA,NCOA6
WP_NOVEL_INTRACELLULAR_COMPONENTS_OF_RIGILIKE_RECEPTOR_RLR_PATHWAY	13/1792	61/13198	0.0631909	0.146084	0.0903945	13	CASP8,OTUD5,CYLD,MAVS,MAP3K1,DDX58,MAPK14,TRIM25,TANK,RELA,TBK1,TBKBP1,DDX3X
PID_E2F_PATHWAY	15/1792	73/13198	0.0636565	0.14701	0.0909673	15	CREBBP,TFE3,EP300,PRMT5,YY1,HBP1,CDKN1B,E2F3,KAT2B,APAF1,CDKN1A,MCL1,RYBP,SP1,TFDP1
KEGG_PENTOSE_PHOSPHATE_PATHWAY	7/1792	27/13198	0.0639164	0.147044	0.0909881	7	PGM1,PGD,ALDOA,G6PD,TKT,FBP1,TALDO1
REACTOME_ATF4_ACTIVATES_GENES_IN_RESPONSE_TO_ENDOPLASMIC_RETICULUM_STRESS	7/1792	27/13198	0.0639164	0.147044	0.0909881	7	NFYA,NFYC,ATF6,ATF3,CEBPB,DCP2,DDIT3
WP_FGFR3_SIGNALLING_IN_CHONDROCYTE_PROLIFERATION_AND_TERMINAL_DIFFERENTIATION	7/1792	27/13198	0.0639164	0.147044	0.0909881	7	MAPK1,MAPK3,MAPK14,PPP2CA,CDKN1A,RAF1,MAP2K1
KEGG_UBIQUITIN_MEDIATED_PROTEOLYSIS	25/1792	135/13198	0.063932	0.147044	0.0909881	25	PIAS1,CUL3,UBE2D1,UBE2A,ITCH,MAP3K1,UBE2W,UBE2R2,UBE2D3,CBL,BIRC6,UBE2B,UBE2M,UBE4B,UBA1,MDM2,HERC4,TRIP12,UBE2L6,CDC26,SOCS3,UBE2L3,UBE2H,SIAH1,WWP2
REACTOME_SUMOYLATION	33/1792	187/13198	0.0668495	0.153403	0.0949231	33	CREBBP,PIAS1,SP100,TP53BP1,NCOA1,HNRNPC,NUP50,EP300,STAG2,NUP98,VDR,NR3C1,STAG1,NUP214,NR1H2,RARA,PHC2,MDM2,NUP58,NCOA2,NR4A2,XPC,SAFB,SENP2,RAD21,HNRNPK,ING2,SP3,RELA,RXRA,TOPORS,TOP1,TRIM27
KEGG_LYSINE_DEGRADATION	10/1792	44/13198	0.0669078	0.153403	0.0949231	10	PLOD1,OGDH,ALDH2,ASH1L,SETD7,NSD3,NSD1,SETD2,KMT5A,TMLHE
WP_HIPPOMERLIN_SIGNALING_DYSREGULATION	23/1792	123/13198	0.0669903	0.153403	0.0949231	23	PRKAR2B,ITGA2B,CD44,CTNNA1,PPP1R12A,PRKACA,ITGB5,PRKAR1A,PRKAR2A,TEK,KRAS,PAK1,LATS2,ITGB2,ITGA5,CTNNB1,PTK2,ITGAM,CDH2,PAK2,CSF1R,PPP1CB,ITGB3
KEGG_BETA_ALANINE_METABOLISM	6/1792	22/13198	0.067608	0.153403	0.0949231	6	SMS,ALDH2,AOC3,AOC2,ABAT,DPYD
KEGG_GLYCOSAMINOGLYCAN_BIOSYNTHESIS_CHONDROITIN_SULFATE	6/1792	22/13198	0.067608	0.153403	0.0949231	6	XYLT1,DSE,CHSY1,CSGALNACT2,CHST11,CHST15
PID_PDGFRA_PATHWAY	6/1792	22/13198	0.067608	0.153403	0.0949231	6	CRKL,JAK1,CRK,FOS,JUN,GRB2
WP_HEMATOPOIETIC_STEM_CELL_GENE_REGULATION_BY_GABP_ALPHABETA_COMPLEX	6/1792	22/13198	0.067608	0.153403	0.0949231	6	CREBBP,EP300,FOXO3,ETV6,SMAD4,MCL1
WP_METHIONINE_DE_NOVO_AND_SALVAGE_PATHWAY	6/1792	22/13198	0.067608	0.153403	0.0949231	6	SMS,AMD1,TXN,MSRB2,MSRB3,MSRA
WP_REGULATION_OF_APOPTOSIS_BY_PARATHYROID_HORMONERELATED_PROTEIN	6/1792	22/13198	0.067608	0.153403	0.0949231	6	BID,BAK1,GSK3B,PIK3CG,BCL2A1,MCL1
REACTOME_CELL_JUNCTION_ORGANIZATION	18/1792	92/13198	0.0680486	0.153403	0.0949231	18	CTNNA1,ACTN1,PVR,PXN,PARD6A,NECTIN1,VASP,ARHGEF6,NECTIN2,RSU1,PARD3,F11R,ILK,CTNNB1,LIMS1,CDH2,CLDN5,ANG
REACTOME_GLUCOSE_METABOLISM	18/1792	92/13198	0.0680486	0.153403	0.0949231	18	PKM,PRKACA,NUP50,PGK1,NUP98,GAPDH,TPI1,PPP2CA,PFKFB4,NUP214,SLC37A2,NUP58,ALDOA,HK1,HK3,FBP1,PFKFB3,PGAM1
BIOCARTA_PRION_PATHWAY	4/1792	12/13198	0.0681942	0.153403	0.0949231	4	HSPA5,DNAJB6,NFE2L2,DNAJB1
REACTOME_HYALURONAN_UPTAKE_AND_DEGRADATION	4/1792	12/13198	0.0681942	0.153403	0.0949231	4	CD44,HEXB,LYVE1,CHP1
REACTOME_JOSEPHIN_DOMAIN_DUBS	4/1792	12/13198	0.0681942	0.153403	0.0949231	4	JOSD1,RAD23B,UBC,VCP
REACTOME_NF_KB_ACTIVATION_THROUGH_FADD_RIP_1_PATHWAY_MEDIATED_BY_CASPASE_8_AND_10	4/1792	12/13198	0.0681942	0.153403	0.0949231	4	CASP8,MAVS,DDX58,TRIM25
REACTOME_PECAM1_INTERACTIONS	4/1792	12/13198	0.0681942	0.153403	0.0949231	4	INPP5D,LYN,ITGB3,PECAM1
REACTOME_REGULATION_OF_GLYCOLYSIS_BY_FRUCTOSE_2_6_BISPHOSPHATE_METABOLISM	4/1792	12/13198	0.0681942	0.153403	0.0949231	4	PRKACA,PPP2CA,PFKFB4,PFKFB3
REACTOME_REGULATION_OF_LOCALIZATION_OF_FOXO_TRANSCRIPTION_FACTORS	4/1792	12/13198	0.0681942	0.153403	0.0949231	4	FOXO3,YWHAZ,YWHAB,FOXO4
REACTOME_SIGNALING_BY_PDGFRA_TRANSMEMBRANE_JUXTAMEMBRANE_AND_KINASE_DOMAIN_MUTANTS	4/1792	12/13198	0.0681942	0.153403	0.0949231	4	PIK3CB,KRAS,STAT3,GRB2
REACTOME_TP53_REGULATES_TRANSCRIPTION_OF_CASPASE_ACTIVATORS_AND_CASPASES	4/1792	12/13198	0.0681942	0.153403	0.0949231	4	NLRC4,APAF1,CASP1,CRADD
REACTOME_VLDLR_INTERNALISATION_AND_DEGRADATION	4/1792	12/13198	0.0681942	0.153403	0.0949231	4	MYLIP,NR1H2,CLTC,AP2M1
SA_PROGRAMMED_CELL_DEATH	4/1792	12/13198	0.0681942	0.153403	0.0949231	4	BID,BAK1,APAF1,BCL10
REACTOME_CHONDROITIN_SULFATE_DERMATAN_SULFATE_METABOLISM	11/1792	50/13198	0.0688055	0.15447	0.0955833	11	IDS,VCAN,HEXB,XYLT1,DSE,ARSB,CHSY1,SDC3,CSGALNACT2,CHST11,CHST15
REACTOME_IRE1ALPHA_ACTIVATES_CHAPERONES	11/1792	50/13198	0.0688055	0.15447	0.0955833	11	EXTL3,HSPA5,PPP2R5B,DNAJC3,TLN1,HDGF,ATP6V0D1,LMNA,TPP1,CTDSP2,ERN1
PID_BETA_CATENIN_NUC_PATHWAY	16/1792	80/13198	0.0697135	0.154595	0.0956605	16	VCAN,EP300,MMP9,TBL1X,HBP1,TLE4,YWHAH,APC,KLF4,NCOA2,YWHAZ,YWHAB,CTNNB1,TBL1XR1,JUN,MED12
REACTOME_NEGATIVE_REGULATION_OF_FGFR1_SIGNALING	8/1792	33/13198	0.0697323	0.154595	0.0956605	8	MAPK1,MAPK3,CBL,PPP2CA,KL,UBC,BRAF,GRB2
REACTOME_PLASMA_LIPOPROTEIN_CLEARANCE	8/1792	33/13198	0.0697323	0.154595	0.0956605	8	MYLIP,SOAT1,HDLBP,NPC2,NR1H2,CLTC,AP2M1,APOBR
BIOCARTA_TEL_PATHWAY	5/1792	17/13198	0.0697527	0.154595	0.0956605	5	XRCC5,HSP90AA1,PPP2CA,TEP1,KRAS
PID_SYNDECAN_3_PATHWAY	5/1792	17/13198	0.0697527	0.154595	0.0956605	5	PSEN1,CTTN,SDC3,NCSTN,PSENEN
REACTOME_ABERRANT_REGULATION_OF_MITOTIC_G1_S_TRANSITION_IN_CANCER_DUE_TO_RB1_DEFECTS	5/1792	17/13198	0.0697527	0.154595	0.0956605	5	CDKN1B,E2F3,CDKN1A,CDKN1C,TFDP1
REACTOME_PKA_ACTIVATION_IN_GLUCAGON_SIGNALLING	5/1792	17/13198	0.0697527	0.154595	0.0956605	5	PRKAR2B,PRKACA,PRKAR1A,PRKAR2A,ADCY4
REACTOME_REGULATION_OF_RUNX1_EXPRESSION_AND_ACTIVITY	5/1792	17/13198	0.0697527	0.154595	0.0956605	5	AGO1,TNRC6B,AGO2,AGO3,AGO4
SA_TRKA_RECEPTOR	5/1792	17/13198	0.0697527	0.154595	0.0956605	5	RHOA,CDKN1A,MAP2K1,PIK3CD,GRB2
WP_AMPLIFICATION_AND_EXPANSION_OF_ONCOGENIC_PATHWAYS_AS_METASTATIC_TRAITS	5/1792	17/13198	0.0697527	0.154595	0.0956605	5	JAG1,PIK3CG,VEGFA,CYTIP,EPAS1
WP_CANONICAL_AND_NONCANONICAL_TGFB_SIGNALING	5/1792	17/13198	0.0697527	0.154595	0.0956605	5	TGFB1,TGFBR1,MAPK14,SMAD4,TGFBR2
WP_NCRNAS_INVOLVED_IN_STAT3_SIGNALING_IN_HEPATOCELLULAR_CARCINOMA	5/1792	17/13198	0.0697527	0.154595	0.0956605	5	JAK3,IL6R,JAK1,STAT3,RELA
WP_SEROTONIN_AND_ANXIETY	5/1792	17/13198	0.0697527	0.154595	0.0956605	5	FMR1,PLEK,PPP3CA,PRKCB,FOS
REACTOME_FCERI_MEDIATED_MAPK_ACTIVATION	17/1792	87/13198	0.0753495	0.166835	0.103234	17	LCP2,MAP2K4,MAP3K1,MAPK1,MAPK3,KRAS,RAC1,VAV1,PAK1,FCER1G,SYK,FOS,JUN,GRB2,PAK2,PLCG2,LYN
BIOCARTA_NO1_PATHWAY	7/1792	28/13198	0.0756545	0.166854	0.103247	7	PRKAR2B,HSP90AA1,PRKAR1A,VEGFA,PRKAR2A,CALM2,CALM3
PID_REELIN_PATHWAY	7/1792	28/13198	0.0756545	0.166854	0.103247	7	PAFAH1B1,GSK3B,CRKL,CBL,RAP1A,ARHGEF2,LRPAP1
REACTOME_ADRENALINE_NORADRENALINE_INHIBITS_INSULIN_SECRETION	7/1792	28/13198	0.0756545	0.166854	0.103247	7	GNB1,GNAI2,GNB4,GNG11,GNB2,GNG5,GNG2
WP_EXTRACELLULAR_VESICLES_IN_THE_CROSSTALK_OF_CARDIAC_CELLS	7/1792	28/13198	0.0756545	0.166854	0.103247	7	MMP9,HSPB1,SPP1,CD63,TLR4,ETS2,STAT3
REACTOME_CARGO_TRAFFICKING_TO_THE_PERICILIARY_MEMBRANE	11/1792	51/13198	0.0774497	0.170647	0.105593	11	RP2,RAB11A,EXOC8,RAB3IP,CCT5,ASAP1,PDE6D,RAB8A,ARF4,UNC119B,BBIP1
KEGG_COMPLEMENT_AND_COAGULATION_CASCADES	14/1792	69/13198	0.0779259	0.171528	0.106139	14	PLAUR,CD59,VWF,CD46,C4BPA,F13A1,SERPING1,THBD,PROS1,CD55,SERPINA1,C5AR1,F5,CR1
PID_ERA_GENOMIC_PATHWAY	13/1792	63/13198	0.0782371	0.171878	0.106355	13	NCOA1,EP300,CTSD,NCOA3,UBE2M,ANP32A,NCOA2,NCOR1,SMAD4,SAFB,CEBPB,JUN,SRA1
REACTOME_TRANSCRIPTIONAL_REGULATION_BY_MECP2	13/1792	63/13198	0.0782371	0.171878	0.106355	13	SLC2A3,PRKACA,AGO1,TNRC6B,TBL1X,CREB1,SGK1,AGO2,AGO3,AGO4,NCOR1,LBR,TBL1XR1
KEGG_FRUCTOSE_AND_MANNOSE_METABOLISM	8/1792	34/13198	0.0808197	0.177378	0.109759	8	TPI1,PFKFB4,MTMR6,ALDOA,HK1,HK3,FBP1,PFKFB3
REACTOME_IKK_COMPLEX_RECRUITMENT_MEDIATED_BY_RIP1	6/1792	23/13198	0.0814003	0.177787	0.110012	6	UBE2D1,UBE2D3,TLR4,UBC,LY96,CD14
REACTOME_INTRINSIC_PATHWAY_OF_FIBRIN_CLOT_FORMATION	6/1792	23/13198	0.0814003	0.177787	0.110012	6	VWF,PRCP,SERPING1,GP9,PROS1,GP1BA
REACTOME_MTORC1_MEDIATED_SIGNALLING	6/1792	23/13198	0.0814003	0.177787	0.110012	6	RRAGD,LAMTOR3,LAMTOR5,LAMTOR1,YWHAB,LAMTOR4
REACTOME_POST_CHAPERONIN_TUBULIN_FOLDING_PATHWAY	6/1792	23/13198	0.0814003	0.177787	0.110012	6	TUBB1,TUBA1B,TUBA4A,TUBA1A,TUBA8,TUBB4B
ST_GA12_PATHWAY	6/1792	23/13198	0.0814003	0.177787	0.110012	6	BTK,MAPK1,RAF1,VAV1,PTK2,JUN
REACTOME_MTOR_SIGNALLING	9/1792	40/13198	0.0840294	0.183174	0.113345	9	RRAGD,PPM1A,LAMTOR3,PRKAA1,LAMTOR5,CAB39,LAMTOR1,YWHAB,LAMTOR4
WP_INTERACTIONS_BETWEEN_IMMUNE_CELLS_AND_MICRORNAS_IN_TUMOR_MICROENVIRONMENT	9/1792	40/13198	0.0840294	0.183174	0.113345	9	TLR8,TGFB1,CD86,CD274,TLR4,TGFBR2,CTLA4,STAT6,STAT3
REACTOME_PTEN_REGULATION	25/1792	139/13198	0.0842407	0.183457	0.11352	25	RRAGD,RCOR1,PSME1,AGO1,MAPK1,TNRC6B,MAPK3,LAMTOR3,CHD4,AGO2,AGO3,PSME3,MKRN1,LAMTOR5,PHC2,AGO4,GATAD2B,LAMTOR1,UBC,JUN,LAMTOR4,WWP2,PSMB8,TRIM27,PSMB3
KEGG_VIRAL_MYOCARDITIS	14/1792	70/13198	0.0858064	0.186496	0.115401	14	BID,CASP8,EIF4G3,MYH9,EIF4G2,CD86,RAC2,RAC1,ITGB2,CD55,HLA-C,HLA-E,HLA-A,HLA-B
WP_ATM_SIGNALING_NETWORK_IN_DEVELOPMENT_AND_DISEASE	10/1792	46/13198	0.0858746	0.186496	0.115401	10	TP53BP1,HSPB1,PRKAA1,LBR,RNF20,G6PD,PPM1D,CEP63,MAP3K5,PRKDC
BIOCARTA_41BB_PATHWAY	5/1792	18/13198	0.0862152	0.186496	0.115401	5	MAP3K1,MAPK14,RELA,JUN,MAP3K5
BIOCARTA_CARDIACEGF_PATHWAY	5/1792	18/13198	0.0862152	0.186496	0.115401	5	RHOA,PRKCB,FOS,RELA,JUN
PID_BETA_CATENIN_DEG_PATHWAY	5/1792	18/13198	0.0862152	0.186496	0.115401	5	GSK3B,CSNK1A1,APC,CSNK1D,CTNNB1
REACTOME_APOPTOTIC_FACTOR_MEDIATED_RESPONSE	5/1792	18/13198	0.0862152	0.186496	0.115401	5	BAK1,MAPK1,MAPK3,CARD8,APAF1
REACTOME_TIE2_SIGNALING	5/1792	18/13198	0.0862152	0.186496	0.115401	5	PIK3CB,TEK,KRAS,ANGPT1,GRB2
REACTOME_SIGNALING_BY_PDGF	12/1792	58/13198	0.0869089	0.187816	0.116218	12	PIK3CB,CRKL,SPP1,PTPN12,KRAS,THBS1,FURIN,STAT6,CRK,STAT3,STAT5B,GRB2
BIOCARTA_CDK5_PATHWAY	4/1792	13/13198	0.0882903	0.18798	0.116319	4	MAPK1,MAPK3,RAF1,MAP2K1
BIOCARTA_IL10_PATHWAY	4/1792	13/13198	0.0882903	0.18798	0.116319	4	HMOX1,JAK1,STAT3,IL10RB
REACTOME_ACTIVATION_OF_RAC1	4/1792	13/13198	0.0882903	0.18798	0.116319	4	SOS2,RAC1,PAK1,PAK2
REACTOME_ALPHA_LINOLENIC_OMEGA3_AND_LINOLEIC_OMEGA6_ACID_METABOLISM	4/1792	13/13198	0.0882903	0.18798	0.116319	4	ELOVL5,HSD17B4,ACSL1,ACOX1
REACTOME_CYTOCHROME_C_MEDIATED_APOPTOTIC_RESPONSE	4/1792	13/13198	0.0882903	0.18798	0.116319	4	MAPK1,MAPK3,CARD8,APAF1
REACTOME_DISSOLUTION_OF_FIBRIN_CLOT	4/1792	13/13198	0.0882903	0.18798	0.116319	4	PLAUR,SERPINB8,SERPINB2,S100A10
REACTOME_DOWNREGULATION_OF_ERBB2_ERBB3_SIGNALING	4/1792	13/13198	0.0882903	0.18798	0.116319	4	USP8,UBC,NRG1,RNF41
REACTOME_IRF3_MEDIATED_INDUCTION_OF_TYPE_I_IFN	4/1792	13/13198	0.0882903	0.18798	0.116319	4	XRCC5,IFI16,TBK1,PRKDC
REACTOME_KERATAN_SULFATE_DEGRADATION	4/1792	13/13198	0.0882903	0.18798	0.116319	4	HEXB,GNS,GALNS,GLB1
REACTOME_LOSS_OF_FUNCTION_OF_MECP2_IN_RETT_SYNDROME	4/1792	13/13198	0.0882903	0.18798	0.116319	4	PRKACA,TBL1X,NCOR1,TBL1XR1
REACTOME_TRANSLATION_OF_REPLICASE_AND_ASSEMBLY_OF_THE_REPLICATION_TRANSCRIPTION_COMPLEX	4/1792	13/13198	0.0882903	0.18798	0.116319	4	PIK3C3,CHMP3,CHMP2A,MAP1LC3B
WP_AUTOSOMAL_RECESSIVE_OSTEOPETROSIS_PATHWAYS	4/1792	13/13198	0.0882903	0.18798	0.116319	4	RAB7A,OSTM1,SNX10,PLEKHM1
WP_ESTROGEN_RECEPTOR_PATHWAY	4/1792	13/13198	0.0882903	0.18798	0.116319	4	ACOX1,STAT3,JUN,SP1
WP_SEROTONIN_AND_ANXIETYRELATED_EVENTS	4/1792	13/13198	0.0882903	0.18798	0.116319	4	PLEK,PPP3CA,PRKCB,FOS
BIOCARTA_DEATH_PATHWAY	7/1792	29/13198	0.088569	0.18798	0.116319	7	CFLAR,BID,CASP8,APAF1,TNFSF10,LMNA,RELA
REACTOME_NEGATIVE_REGULATION_OF_FGFR3_SIGNALING	7/1792	29/13198	0.088569	0.18798	0.116319	7	MAPK1,MAPK3,CBL,PPP2CA,UBC,BRAF,GRB2
REACTOME_TRAF6_MEDIATED_IRF7_ACTIVATION	7/1792	29/13198	0.088569	0.18798	0.116319	7	CREBBP,MAVS,EP300,DDX58,TRIM25,TANK,TBK1
REACTOME_UPTAKE_AND_ACTIONS_OF_BACTERIAL_TOXINS	7/1792	29/13198	0.088569	0.18798	0.116319	7	MAP2K4,HSP90AA1,HSP90AB1,HBEGF,FURIN,ANTXR2,MAP2K1
WP_EICOSANOID_METABOLISM_VIA_LIPO_OXYGENASES_LOX	7/1792	29/13198	0.088569	0.18798	0.116319	7	ALOX5,ALOX12,CYSLTR2,ACOX1,FPR2,CYSLTR1,LTB4R
REACTOME_FC_EPSILON_RECEPTOR_FCERI_SIGNALING	32/1792	186/13198	0.0919458	0.194963	0.12064	32	BTK,GAB2,LCP2,PIK3CB,TAB2,MAP2K4,UBE2D1,LAT2,PSME1,MAP3K1,MAPK1,MAPK3,PSME3,KRAS,RAC1,PPP3CA,VAV1,BCL10,PAK1,UBC,FCER1G,SYK,FOS,RASGRP4,RELA,JUN,GRB2,PAK2,PLCG2,PSMB8,LYN,PSMB3
KEGG_PRION_DISEASES	8/1792	35/13198	0.0928894	0.19641	0.121535	8	HSPA5,PRKACA,MAPK1,MAPK3,IL1B,STIP1,MAP2K1,HSPA1A
PID_HIV_NEF_PATHWAY	8/1792	35/13198	0.0928894	0.19641	0.121535	8	CFLAR,BID,CASP8,TNFRSF1A,APAF1,CRADD,RELA,MAP3K5
REACTOME_INWARDLY_RECTIFYING_K_CHANNELS	8/1792	35/13198	0.0928894	0.19641	0.121535	8	GNB1,GNB4,KCNJ2,GNG11,KCNJ15,GNB2,GNG5,GNG2
KEGG_MELANOMA	14/1792	71/13198	0.0941735	0.198938	0.1231	14	PIK3CB,MAPK1,MAPK3,PIK3CG,E2F3,CDKN1A,FGF13,RAF1,KRAS,MDM2,PIK3R5,BRAF,MAP2K1,PIK3CD
REACTOME_SIGNALING_BY_FGFR4	9/1792	41/13198	0.0953221	0.201176	0.124484	9	MAPK1,MAPK3,GAB1,CBL,PPP2CA,KRAS,UBC,BRAF,GRB2
REACTOME_CYCLIN_D_ASSOCIATED_EVENTS_IN_G1	10/1792	47/13198	0.0964624	0.202935	0.125573	10	CDKN1B,E2F3,PPP2CA,CDKN1A,CDKN2D,CDKN1C,UBC,TFDP1,PPP2R2A,LYN
REACTOME_INTERLEUKIN_6_FAMILY_SIGNALING	6/1792	24/13198	0.0966347	0.202935	0.125573	6	OSM,CBL,IL6R,JAK1,STAT3,SOCS3
REACTOME_SYNTHESIS_OF_BILE_ACIDS_AND_BILE_SALTS_VIA_7ALPHA_HYDROXYCHOLESTEROL	6/1792	24/13198	0.0966347	0.202935	0.125573	6	NCOA1,HSD17B4,CYP27A1,NCOA2,RXRA,AMACR
REACTOME_SYNTHESIS_OF_VERY_LONG_CHAIN_FATTY_ACYL_COAS	6/1792	24/13198	0.0966347	0.202935	0.125573	6	ELOVL5,ACSL4,ACSL3,HSD17B12,ACSL1,HACD4
REACTOME_TRAF6_MEDIATED_NF_KB_ACTIVATION	6/1792	24/13198	0.0966347	0.202935	0.125573	6	MAVS,MAP3K1,DDX58,TRIM25,S100A12,RELA
REACTOME_NUCLEAR_RECEPTOR_TRANSCRIPTION_PATHWAY	11/1792	53/13198	0.0966956	0.202935	0.125573	11	VDR,NR3C1,NR4A1,NR1H2,RARA,NCOR1,NR6A1,NRBF2,NR4A2,NR2C2,RXRA
PID_IL2_STAT5_PATHWAY	7/1792	30/13198	0.102645	0.214622	0.132805	7	GAB2,JAK3,ELF1,JAK1,STAT5B,GRB2,SP1
PID_RAS_PATHWAY	7/1792	30/13198	0.102645	0.214622	0.132805	7	SOS2,KRAS,RABGEF1,PRKCB,RASGRP4,GRB2,NF1
REACTOME_SUMOYLATION_OF_INTRACELLULAR_RECEPTORS	7/1792	30/13198	0.102645	0.214622	0.132805	7	PIAS1,VDR,NR3C1,NR1H2,RARA,NR4A2,RXRA
WP_AUTOPHAGY	7/1792	30/13198	0.102645	0.214622	0.132805	7	RB1CC1,PIK3C3,PRKAA1,MAP1LC3B,ATG3,ATG7,ATG9A
REACTOME_AURKA_ACTIVATION_BY_TPX2	14/1792	72/13198	0.103029	0.215224	0.133177	14	PRKAR2B,PAFAH1B1,SDCCAG8,PRKACA,NDE1,HSP90AA1,HAUS4,MAPRE1,TUBA4A,ACTR1A,CSNK1D,TUBA1A,CEP63,TUBB4B
BIOCARTA_CHREBP_PATHWAY	5/1792	19/13198	0.104511	0.217114	0.134346	5	PRKAR2B,PRKAR1A,PPP2CA,PRKAR2A,PRKAA1
BIOCARTA_MCALPAIN_PATHWAY	5/1792	19/13198	0.104511	0.217114	0.134346	5	PRKAR2B,CAPN1,PRKAR1A,PRKAR2A,TLN1
REACTOME_REGULATION_OF_TP53_ACTIVITY_THROUGH_METHYLATION	5/1792	19/13198	0.104511	0.217114	0.134346	5	EP300,PRMT5,MDM2,UBC,KMT5A
WP_HOSTPATHOGEN_INTERACTION_OF_HUMAN_CORONA_VIRUSES_AUTOPHAGY	5/1792	19/13198	0.104511	0.217114	0.134346	5	RB1CC1,PIK3C3,ATG3,ZFYVE1,ATG7
WP_NUCLEOTIDE_METABOLISM	5/1792	19/13198	0.104511	0.217114	0.134346	5	RRM2B,POLB,OAZ1,IMPDH1,SAT1
WP_OVERVIEW_OF_NANOPARTICLE_EFFECTS	5/1792	19/13198	0.104511	0.217114	0.134346	5	PTGS2,PTGS1,HMOX1,PTK2,PIK3CD
REACTOME_HIV_LIFE_CYCLE	26/1792	149/13198	0.105068	0.218069	0.134937	26	POLR2J,TSG101,XRCC5,CHMP5,CCNK,NUP50,POLR2C,ELL,NUP98,KPNA1,CHMP3,VPS4B,TAF12,NUP214,CHMP2A,GTF2B,NUP58,VPS37B,FURIN,UBC,VPS37A,UBAP1,VPS37C,LIG4,RCC1,SUPT4H1
REACTOME_GABA_RECEPTOR_ACTIVATION	12/1792	60/13198	0.10624	0.220299	0.136317	12	GNAI3,GNB1,GNAI2,GNB4,KCNJ2,GNG11,ADCY4,NPTN,KCNJ15,GNB2,GNG5,GNG2
REACTOME_INSULIN_RECEPTOR_SIGNALLING_CASCADE	11/1792	54/13198	0.107298	0.222288	0.137548	11	GAB2,PIK3CB,PIK3C3,MAPK1,MAPK3,GRB10,GAB1,KL,KRAS,GRB2,TLR9
WP_FIBRIN_COMPLEMENT_RECEPTOR_3_SIGNALING_PATHWAY	9/1792	42/13198	0.107451	0.222401	0.137618	9	TYROBP,RHOA,TLR4,LY96,ITGB2,SYK,ITGAM,CD14,RASSF5
WP_ENERGY_METABOLISM	10/1792	48/13198	0.107783	0.222884	0.137917	10	GSK3B,NCOA1,EP300,MAPK14,MEF2D,CREB1,FOXO3,PRKAA1,PPP3CA,RXRA
REACTOME_THE_ROLE_OF_GTSE1_IN_G2_M_PROGRESSION_AFTER_G2_CHECKPOINT	15/1792	79/13198	0.109905	0.226775	0.140325	15	HSP90AA1,PSME1,HSP90AB1,TUBB1,MAPRE1,TUBA1B,CDKN1A,TUBA4A,PSME3,UBC,TUBA1A,TUBA8,TUBB4B,PSMB8,PSMB3
BIOCARTA_ACH_PATHWAY	4/1792	14/13198	0.110872	0.226775	0.140325	4	PIK3CG,FOXO3,PTK2B,YWHAH
BIOCARTA_AKAPCENTROSOME_PATHWAY	4/1792	14/13198	0.110872	0.226775	0.140325	4	PRKAR2B,RHOA,PPP2CA,PRKAR2A
BIOCARTA_BLYMPHOCYTE_PATHWAY	4/1792	14/13198	0.110872	0.226775	0.140325	4	FCGR2B,PTPRC,ITGB2,CR1
BIOCARTA_GATA3_PATHWAY	4/1792	14/13198	0.110872	0.226775	0.140325	4	PRKAR2B,PRKAR1A,MAPK14,PRKAR2A
BIOCARTA_HSP27_PATHWAY	4/1792	14/13198	0.110872	0.226775	0.140325	4	HSPB1,MAPKAPK3,APAF1,MAPKAPK2
REACTOME_CS_DS_DEGRADATION	4/1792	14/13198	0.110872	0.226775	0.140325	4	IDS,VCAN,HEXB,ARSB
REACTOME_DCC_MEDIATED_ATTRACTIVE_SIGNALING	4/1792	14/13198	0.110872	0.226775	0.140325	4	CDC42,RAC1,PTK2,ABLIM3
REACTOME_IRAK1_RECRUITS_IKK_COMPLEX	4/1792	14/13198	0.110872	0.226775	0.140325	4	PELI2,UBC,PELI3,PELI1
REACTOME_RETROGRADE_NEUROTROPHIN_SIGNALLING	4/1792	14/13198	0.110872	0.226775	0.140325	4	DNM2,CLTC,AP2M1,DNM3
REACTOME_TP53_REGULATES_TRANSCRIPTION_OF_GENES_INVOLVED_IN_G1_CELL_CYCLE_ARREST	4/1792	14/13198	0.110872	0.226775	0.140325	4	CDKN1B,ARID3A,CDKN1A,ZNF385A
REACTOME_TRIGLYCERIDE_BIOSYNTHESIS	4/1792	14/13198	0.110872	0.226775	0.140325	4	DGAT2,LPIN2,DGAT1,GK
REACTOME_MITOTIC_PROMETAPHASE	34/1792	203/13198	0.112036	0.228947	0.141668	34	PRKAR2B,PAFAH1B1,SDCCAG8,WAPL,PPP2R5A,PPP2R5B,PRKACA,NDE1,HSP90AA1,PDS5B,HAUS4,TUBB1,MAPRE1,STAG2,NUP98,PPP2CA,STAG1,NEK6,TUBA1B,B9D2,TUBA4A,CLIP1,DYNC1LI2,ACTR1A,CSNK1D,DYNC1LI1,AHCTF1,TAOK1,RAD21,NDEL1,TUBA1A,CEP63,TUBA8,TUBB4B
WP_STEROL_REGULATORY_ELEMENTBINDING_PROTEINS_SREBP_SIGNALLING	14/1792	73/13198	0.112371	0.229425	0.141964	14	NFYA,PRKACA,YY1,SEC23A,SEC23B,KPNB1,HMGCR,ATF6,CREB1,NR1H2,PRKAA1,SEC24D,CAMP,SP1
BIOCARTA_HDAC_PATHWAY	6/1792	25/13198	0.113269	0.231049	0.142969	6	PIK3CG,MAPK14,YWHAH,PPP3CA,CALM2,CALM3
REACTOME_REGULATION_OF_PTEN_GENE_TRANSCRIPTION	12/1792	61/13198	0.116783	0.238	0.14727	12	RRAGD,RCOR1,MAPK1,MAPK3,LAMTOR3,CHD4,LAMTOR5,PHC2,GATAD2B,LAMTOR1,JUN,LAMTOR4
REACTOME_NEGATIVE_REGULATION_OF_FGFR4_SIGNALING	7/1792	31/13198	0.117856	0.239537	0.148222	7	MAPK1,MAPK3,CBL,PPP2CA,UBC,BRAF,GRB2
REACTOME_NICOTINATE_METABOLISM	7/1792	31/13198	0.117856	0.239537	0.148222	7	NADK,PTGS2,NAMPT,BST1,PARP9,PARP8,NMNAT1
WP_SARS_CORONAVIRUS_AND_INNATE_IMMUNITY	7/1792	31/13198	0.117856	0.239537	0.148222	7	MAVS,DDX58,IFNAR1,IFNAR2,JAK1,STAT2,TBK1
REACTOME_SEPARATION_OF_SISTER_CHROMATIDS	32/1792	191/13198	0.119755	0.242437	0.150016	32	PAFAH1B1,WAPL,PPP2R5A,PPP2R5B,UBE2D1,NDE1,PDS5B,PSME1,TUBB1,MAPRE1,STAG2,NUP98,PPP2CA,STAG1,TUBA1B,B9D2,TUBA4A,CLIP1,PSME3,DYNC1LI2,DYNC1LI1,UBC,AHCTF1,TAOK1,RAD21,NDEL1,TUBA1A,CDC26,TUBA8,TUBB4B,PSMB8,PSMB3
REACTOME_RETROGRADE_TRANSPORT_AT_THE_TRANS_GOLGI_NETWORK	10/1792	49/13198	0.119829	0.242437	0.150016	10	VAMP3,PLIN3,RIC1,STX16,STX6,TMF1,VTI1A,TGOLN2,GCC1,IGF2R
REACTOME_TP53_REGULATES_TRANSCRIPTION_OF_CELL_CYCLE_GENES	10/1792	49/13198	0.119829	0.242437	0.150016	10	EP300,CDKN1B,CNOT6,ARID3A,CDKN1A,CNOT8,BTG2,ZNF385A,PLK3,TFDP1
WP_RETT_SYNDROME_CAUSING_GENES	10/1792	49/13198	0.119829	0.242437	0.150016	10	CDKL5,HIVEP2,SYNE2,TBL1X,CHD4,KDM5B,NCOR1,BRAF,CRK,TBL1XR1
BIOCARTA_ALK_PATHWAY	8/1792	37/13198	0.119928	0.242437	0.150016	8	GSK3B,TGFB1,TGFBR1,ACVR1,APC,SMAD4,TGFBR2,CTNNB1
REACTOME_FATTY_ACYL_COA_BIOSYNTHESIS	8/1792	37/13198	0.119928	0.242437	0.150016	8	ELOVL5,ACSL4,ACSL3,PPT1,HSD17B12,ACSL1,OLAH,HACD4
REACTOME_SUMOYLATION_OF_TRANSCRIPTION_COFACTORS	9/1792	43/13198	0.120403	0.242963	0.150341	9	CREBBP,PIAS1,NCOA1,EP300,PHC2,NCOA2,SAFB,ING2,TOPORS
REACTOME_TNF_SIGNALING	9/1792	43/13198	0.120403	0.242963	0.150341	9	TAB2,CASP8,TNFRSF1A,CYLD,TAX1BP1,USP4,TNFAIP3,UBC,ADAM17
REACTOME_COSTIMULATION_BY_THE_CD28_FAMILY	14/1792	74/13198	0.122198	0.246364	0.152446	14	PPP2R5A,PPP2R5B,CDC42,PPP2CA,CD86,CD274,RAC1,VAV1,PAK1,CTLA4,RICTOR,GRB2,PAK2,LYN
PID_WNT_CANONICAL_PATHWAY	5/1792	20/13198	0.124544	0.24931	0.154269	5	CUL3,PPP2R5A,GSK3B,APC,CTNNB1
REACTOME_CHONDROITIN_SULFATE_BIOSYNTHESIS	5/1792	20/13198	0.124544	0.24931	0.154269	5	VCAN,CHSY1,CSGALNACT2,CHST11,CHST15
REACTOME_SIGNALING_BY_HIPPO	5/1792	20/13198	0.124544	0.24931	0.154269	5	STK4,MOB1A,TJP2,LATS2,YWHAB
REACTOME_SIGNALING_BY_KIT_IN_DISEASE	5/1792	20/13198	0.124544	0.24931	0.154269	5	KRAS,STAT3,STAT5B,GRB2,LYN
REACTOME_TP53_REGULATES_TRANSCRIPTION_OF_GENES_INVOLVED_IN_CYTOCHROME_C_RELEASE	5/1792	20/13198	0.124544	0.24931	0.154269	5	CREBBP,BID,BNIP3L,TP53INP1,PRELID1
WP_BMP_SIGNALING_PATHWAY_IN_EYELID_DEVELOPMENT	5/1792	20/13198	0.124544	0.24931	0.154269	5	MAP3K1,MAPK3,SMAD4,TGFA,JUN
WP_LTF_DANGER_SIGNAL_RESPONSE_PATHWAY	5/1792	20/13198	0.124544	0.24931	0.154269	5	MAPK1,TREM1,IL1B,TLR4,CD14
WP_NANOMATERIAL_INDUCED_APOPTOSIS	5/1792	20/13198	0.124544	0.24931	0.154269	5	CFLAR,BID,BAK1,CASP8,APAF1
KEGG_P53_SIGNALING_PATHWAY	13/1792	68/13198	0.125127	0.250032	0.154715	13	BID,RRM2B,CASP8,GADD45B,APAF1,TNFRSF10B,CDKN1A,SESN2,MDM2,THBS1,SHISA5,PPM1D,SIAH1
REACTOME_COPII_MEDIATED_VESICLE_TRANSPORT	13/1792	68/13198	0.125127	0.250032	0.154715	13	CD59,SEC23A,CTSZ,RAB1A,CSNK1D,SEC24D,STX5,TGFA,LMAN2,RAB1B,SERPINA1,F5,SEC22B
REACTOME_M_PHASE	65/1792	417/13198	0.127054	0.253446	0.156828	65	PRKAR2B,PAFAH1B1,SDCCAG8,WAPL,PPP2R5A,SIRT2,PPP2R5B,PRKACA,UBE2D1,NDE1,HSP90AA1,PDS5B,PSME1,HAUS4,NUP50,MAPK1,TUBB1,MAPRE1,LPIN2,STAG2,MAPK3,RAB2A,KPNB1,NUP98,LMNB1,PPP2CA,CHMP3,BLZF1,STAG1,NEK6,TUBA1B,B9D2,NUP214,TUBA4A,CHMP2A,CLIP1,PSME3,DYNC1LI2,RAB1A,ACTR1A,NUP58,CSNK1D,LBR,DYNC1LI1,UBC,AHCTF1,TAOK1,LMNA,NIPBL,RAD21,PRKCB,NDEL1,TUBA1A,RAB1B,CDC26,RCC1,IST1,CEP63,TUBA8,KMT5A,TUBB4B,PSMB8,CNEP1…
REACTOME_OXIDATIVE_STRESS_INDUCED_SENESCENCE	22/1792	126/13198	0.12706	0.253446	0.156828	22	MAP2K4,MAP4K4,AGO1,MAPK1,TNRC6B,MAPK3,MAPK14,E2F3,MAPKAPK3,AGO3,CDKN2D,KDM6B,PHC2,AGO4,MDM2,TXN,UBC,MAPKAPK2,FOS,JUN,MAP3K5,TFDP1
KEGG_GLYCOLYSIS_GLUCONEOGENESIS	12/1792	62/13198	0.127902	0.254674	0.157588	12	PKM,PGM1,PGK1,ALDH2,GAPDH,TPI1,LDHA,ALDOA,HK1,HK3,FBP1,PGAM1
WP_HEMATOPOIETIC_STEM_CELL_DIFFERENTIATION	12/1792	62/13198	0.127902	0.254674	0.157588	12	ITGA2B,SPI1,NFE2,IL1B,FOSB,LMO2,ACVR1B,VAV1,FLI1,GP9,FOS,ITGB3
REACTOME_RECRUITMENT_OF_MITOTIC_CENTROSOME_PROTEINS_AND_COMPLEXES	15/1792	81/13198	0.1289	0.256435	0.158678	15	PRKAR2B,PAFAH1B1,SDCCAG8,PRKACA,NDE1,HSP90AA1,HAUS4,MAPRE1,TUBA4A,ACTR1A,CSNK1D,TUBA1A,CEP63,TUBB4B,CDK11B
WP_MRNA_PROCESSING	23/1792	133/13198	0.130527	0.259442	0.160538	23	RBM5,CLK1,DHX8,PAPOLA,HNRNPC,SRPK1,SF3A1,DICER1,SRSF9,CLK4,SF3B1,SRSF4,SPOP,HNRNPH2,RBM39,SRPK2,CELF1,HNRNPU,HNRNPK,PRPF18,CLK3,PCBP2,U2AF1L5
PID_IL27_PATHWAY	6/1792	26/13198	0.131243	0.259721	0.160711	6	IL12RB2,TGFB1,IL1B,JAK1,STAT3,STAT2
PID_INTEGRIN_CS_PATHWAY	6/1792	26/13198	0.131243	0.259721	0.160711	6	ITGA2B,ITGB5,ITGB2,ITGA5,ITGAM,ITGB3
REACTOME_DECTIN_2_FAMILY	6/1792	26/13198	0.131243	0.259721	0.160711	6	FCER1G,SYK,CLEC4E,CLEC4D,PLCG2,LYN
ST_INTERLEUKIN_4_PATHWAY	6/1792	26/13198	0.131243	0.259721	0.160711	6	SOS2,JAK3,JAK1,STAT6,INPP5D,GRB2
WP_TRIACYLGLYCERIDE_SYNTHESIS	6/1792	26/13198	0.131243	0.259721	0.160711	6	AGPAT4,DGAT2,AGPAT2,DGAT1,GK,AGPAT1
REACTOME_HDMS_DEMETHYLATE_HISTONES	10/1792	50/13198	0.132584	0.261915	0.162069	10	KDM7A,JMJD6,KDM5A,KDM3A,KDM5B,KDM3B,KDM4B,KDM6B,KDM6A,KDM2A
REACTOME_SIGNALING_BY_FGFR1	10/1792	50/13198	0.132584	0.261915	0.162069	10	MAPK1,MAPK3,GAB1,CBL,PPP2CA,KL,KRAS,UBC,BRAF,GRB2
REACTOME_MITOTIC_G2_G2_M_PHASES	33/1792	200/13198	0.134081	0.263482	0.163038	33	PRKAR2B,PAFAH1B1,SDCCAG8,PPP1R12A,PRKACA,NDE1,PPP1R12B,HSP90AA1,PSME1,HAUS4,HSP90AB1,EP300,TUBB1,MAPRE1,E2F3,PPP2CA,TUBA1B,CDKN1A,TUBA4A,PSME3,ACTR1A,CSNK1D,UBC,RAB8A,TUBA1A,CEP63,TUBA8,TUBB4B,PSMB8,PPP1CB,PPP2R2A,CDK11B,PSMB3
WP_NEURODEGENERATION_WITH_BRAIN_IRON_ACCUMULATION_NBIA_SUBTYPES_PATHWAY	9/1792	44/13198	0.134159	0.263482	0.163038	9	RB1CC1,PIK3C3,FTL,SPTLC1,ATG2A,PANK2,PRKAA1,ATG3,ATG7
PID_WNT_NONCANONICAL_PATHWAY	7/1792	32/13198	0.13416	0.263482	0.163038	7	TAB2,RHOA,ROCK1,CDC42,CSNK1A1,RAC1,ARRB2
REACTOME_SMAD2_SMAD3_SMAD4_HETEROTRIMER_REGULATES_TRANSCRIPTION	7/1792	32/13198	0.13416	0.263482	0.163038	7	CCNK,SMAD4,UBC,RNF111,JUNB,SP1,TFDP1
WP_CONSTITUTIVE_ANDROSTANE_RECEPTOR_PATHWAY	7/1792	32/13198	0.13416	0.263482	0.163038	7	HSP90AA1,NCOA1,ABCC3,NCOA2,SP1,RXRA,NCOA6
WP_NONALCOHOLIC_FATTY_LIVER_DISEASE	27/1792	160/13198	0.134728	0.263482	0.163038	27	ADIPOR2,BID,BAK1,PIK3CB,VMP1,CASP8,TNFRSF1A,CDC42,ITCH,GSK3B,TGFB1,SDHB,NDUFB3,NDUFA1,IL1B,PRKAA1,RAC1,SDHC,IL6R,PIK3CD,RELA,DDIT3,JUN,ERN1,SOCS3,RXRA,MAP3K5
REACTOME_SIGNALING_BY_FGFR1_IN_DISEASE	8/1792	38/13198	0.13485	0.263482	0.163038	8	GAB2,GAB1,LRRFIP1,KRAS,STAT3,STAT5B,GRB2,CUX1
REACTOME_TRIGLYCERIDE_METABOLISM	8/1792	38/13198	0.13485	0.263482	0.163038	8	ABHD5,DGAT2,PRKACA,LPIN2,PLIN3,DGAT1,GK,PPP1CB
BIOCARTA_AMAN_PATHWAY	4/1792	15/13198	0.135715	0.263482	0.163038	4	ST3GAL4,MAN1A1,ST8SIA4,FUT7
BIOCARTA_BCELLSURVIVAL_PATHWAY	4/1792	15/13198	0.135715	0.263482	0.163038	4	PIK3CG,JUND,DPF2,FOS
BIOCARTA_CD40_PATHWAY	4/1792	15/13198	0.135715	0.263482	0.163038	4	MAP3K1,TNFAIP3,DUSP1,RELA
BIOCARTA_LONGEVITY_PATHWAY	4/1792	15/13198	0.135715	0.263482	0.163038	4	PIK3CG,SOD2,FOXO3,CAT
BIOCARTA_PGC1A_PATHWAY	4/1792	15/13198	0.135715	0.263482	0.163038	4	YWHAH,PPP3CA,CALM2,CALM3
KEGG_GLYCOSPHINGOLIPID_BIOSYNTHESIS_GANGLIO_SERIES	4/1792	15/13198	0.135715	0.263482	0.163038	4	HEXB,ST3GAL2,GLB1,ST6GALNAC3
PID_ERB_GENOMIC_PATHWAY	4/1792	15/13198	0.135715	0.263482	0.163038	4	NCOA1,NCOA3,UBE2M,NCOA2
REACTOME_ACTIVATION_OF_BAD_AND_TRANSLOCATION_TO_MITOCHONDRIA_	4/1792	15/13198	0.135715	0.263482	0.163038	4	BID,YWHAH,YWHAZ,YWHAB
REACTOME_METABOLISM_OF_NITRIC_OXIDE_NOS3_ACTIVATION_AND_REGULATION	4/1792	15/13198	0.135715	0.263482	0.163038	4	DNM2,HSP90AA1,SPR,DDAH2
REACTOME_PENTOSE_PHOSPHATE_PATHWAY	4/1792	15/13198	0.135715	0.263482	0.163038	4	PGD,G6PD,TKT,TALDO1
REACTOME_SYNTHESIS_OF_BILE_ACIDS_AND_BILE_SALTS_VIA_27_HYDROXYCHOLESTEROL	4/1792	15/13198	0.135715	0.263482	0.163038	4	NCOA1,CYP27A1,NCOA2,RXRA
REACTOME_WNT5A_DEPENDENT_INTERNALIZATION_OF_FZD4	4/1792	15/13198	0.135715	0.263482	0.163038	4	CLTC,ARRB2,AP2M1,PRKCB
REACTOME_CYTOSOLIC_SENSORS_OF_PATHOGEN_ASSOCIATED_DNA_	12/1792	63/13198	0.139588	0.270767	0.167546	12	CREBBP,XRCC5,EP300,LRRFIP1,TRIM21,UBC,IFI16,STAT6,CTNNB1,RELA,TBK1,PRKDC
REACTOME_RECRUITMENT_OF_NUMA_TO_MITOTIC_CENTROSOMES	17/1792	95/13198	0.140304	0.271921	0.16826	17	PRKAR2B,PAFAH1B1,SDCCAG8,PRKACA,NDE1,HSP90AA1,HAUS4,TUBB1,MAPRE1,TUBA1B,TUBA4A,ACTR1A,CSNK1D,TUBA1A,CEP63,TUBA8,TUBB4B
REACTOME_SIGNALING_BY_WNT	52/1792	331/13198	0.14371	0.276679	0.171204	52	CREBBP,ZRANB1,CUL3,PPP2R5A,RHOA,PPP2R5B,VPS35,GNB1,GSK3B,PSME1,AGO1,TNRC6B,EP300,PARD6A,TLE4,PPP2CA,CSNK1A1,GNB4,USP34,WLS,RBBP5,AGO2,AGO3,GNG11,RAC2,PSME3,KRAS,CDC73,AGO4,APC,RAC1,USP8,PPP3CA,TLE3,CLTC,ARRB2,PLCB3,UBC,AP2M1,YWHAZ,FRAT1,PRKCB,CTNNB1,GNB2,GNG5,CTBP2,FRAT2,PLCB1,KREMEN1,GNG2,PSMB8,PSMB3
BIOCARTA_ETC_PATHWAY	3/1792	10/13198	0.144232	0.276679	0.171204	3	SDHB,NDUFA1,SDHC
BIOCARTA_RNA_PATHWAY	3/1792	10/13198	0.144232	0.276679	0.171204	3	EIF2AK2,DNAJC3,RELA
BIOCARTA_SET_PATHWAY	3/1792	10/13198	0.144232	0.276679	0.171204	3	CREBBP,ANP32A,HMGB2
BIOCARTA_SODD_PATHWAY	3/1792	10/13198	0.144232	0.276679	0.171204	3	TNFRSF1B,CASP8,TNFRSF1A
REACTOME_MATURATION_OF_NUCLEOPROTEIN	3/1792	10/13198	0.144232	0.276679	0.171204	3	GSK3B,PARP9,PARP8
REACTOME_NEF_MEDIATED_DOWNREGULATION_OF_MHC_CLASS_I_COMPLEX_CELL_SURFACE_EXPRESSION	3/1792	10/13198	0.144232	0.276679	0.171204	3	B2M,AP1S2,HLA-A
REACTOME_PI3K_EVENTS_IN_ERBB4_SIGNALING	3/1792	10/13198	0.144232	0.276679	0.171204	3	HBEGF,EREG,NRG1
REACTOME_RUNX3_REGULATES_P14_ARF	3/1792	10/13198	0.144232	0.276679	0.171204	3	EP300,TGFB1,KRAS
REACTOME_SIGNALING_BY_FGFR3_FUSIONS_IN_CANCER	3/1792	10/13198	0.144232	0.276679	0.171204	3	GAB1,KRAS,GRB2
WP_TYPE_III_INTERFERON_SIGNALING	3/1792	10/13198	0.144232	0.276679	0.171204	3	JAK1,STAT2,IL10RB
WP_VITAMIN_D_METABOLISM	3/1792	10/13198	0.144232	0.276679	0.171204	3	VDR,CYP27A1,RXRA
REACTOME_EPH_EPHRIN_MEDIATED_REPULSION_OF_CELLS	10/1792	51/13198	0.146032	0.27901	0.172647	10	PSEN1,MMP9,RAC1,ADAM10,CLTC,AP2M1,NCSTN,EPHB4,PSENEN,LYN
PID_ECADHERIN_KERATINOCYTE_PATHWAY	5/1792	21/13198	0.14619	0.27901	0.172647	5	CTNNA1,RHOA,VASP,RAC1,CTNNB1
REACTOME_INTERLEUKIN_37_SIGNALING	5/1792	21/13198	0.14619	0.27901	0.172647	5	IL18R1,PTPN12,CASP1,STAT3,TBK1
REACTOME_NEF_MEDIATES_DOWN_MODULATION_OF_CELL_SURFACE_RECEPTORS_BY_RECRUITING_THEM_TO_CLATHRIN_ADAPTERS	5/1792	21/13198	0.14619	0.27901	0.172647	5	ARF1,AP2M1,B2M,AP1S2,HLA-A
REACTOME_SYNTHESIS_OF_LEUKOTRIENES_LT_AND_EOXINS_EX_	5/1792	21/13198	0.14619	0.27901	0.172647	5	ALOX5,ALOX5AP,MAPKAPK2,DPEP2,CYP4F3
WP_IMATINIB_AND_CHRONIC_MYELOID_LEUKEMIA	5/1792	21/13198	0.14619	0.27901	0.172647	5	GAB2,PIM2,CDKN1B,FOXO3,CSF1R
REACTOME_ELASTIC_FIBRE_FORMATION	9/1792	45/13198	0.148693	0.283309	0.175307	9	LTBP1,ITGB5,TGFB1,EMILIN2,FBN2,MFAP1,FURIN,ITGA5,ITGB3
WP_PROSTAGLANDIN_SYNTHESIS_AND_REGULATION	9/1792	45/13198	0.148693	0.283309	0.175307	9	TBXAS1,PTGS2,PTGS1,ANXA1,ANXA3,PTGES,ANXA5,S100A10,S100A6
BIOCARTA_VEGF_PATHWAY	6/1792	27/13198	0.15048	0.285506	0.176666	6	HIF1A,PIK3CG,VEGFA,ARNT,PRKCB,EIF1
REACTOME_ACYL_CHAIN_REMODELLING_OF_PC	6/1792	27/13198	0.15048	0.285506	0.176666	6	LPCAT2,LPCAT3,PLBD1,MBOAT2,LPCAT1,PLB1
REACTOME_ENDOGENOUS_STEROLS	6/1792	27/13198	0.15048	0.285506	0.176666	6	NCOA1,AHR,CYP27A1,NCOA2,ARNT,RXRA
REACTOME_INSULIN_PROCESSING	6/1792	27/13198	0.15048	0.285506	0.176666	6	RAB27A,ERO1B,EXOC8,KIF5B,MYO5A,ERO1A
REACTOME_SYNDECAN_INTERACTIONS	6/1792	27/13198	0.15048	0.285506	0.176666	6	ACTN1,ITGB5,TGFB1,THBS1,SDC3,ITGB3
WP_NUCLEAR_RECEPTORS	8/1792	39/13198	0.150662	0.285611	0.176731	8	VDR,NR3C1,NR4A1,NR1H2,RARA,NR4A2,NR2C2,RXRA
REACTOME_ADHERENS_JUNCTIONS_INTERACTIONS	7/1792	33/13198	0.151505	0.286248	0.177125	7	CTNNA1,PVR,NECTIN1,NECTIN2,CTNNB1,CDH2,ANG
REACTOME_COOPERATION_OF_PREFOLDIN_AND_TRIC_CCT_IN_ACTIN_AND_TUBULIN_FOLDING	7/1792	33/13198	0.151505	0.286248	0.177125	7	TUBB1,TUBA1B,TUBA4A,CCT5,TUBA1A,TUBA8,TUBB4B
REACTOME_GLUCAGON_TYPE_LIGAND_RECEPTORS	7/1792	33/13198	0.151505	0.286248	0.177125	7	GNB1,GNB4,GNG11,CYSLTR2,GNB2,GNG5,GNG2
REACTOME_REGULATION_OF_TNFR1_SIGNALING	7/1792	33/13198	0.151505	0.286248	0.177125	7	CASP8,TNFRSF1A,CYLD,TAX1BP1,USP4,TNFAIP3,UBC
WP_BREAST_CANCER_PATHWAY	26/1792	156/13198	0.15487	0.292359	0.180907	26	BAK1,GSK3B,NCOA1,GADD45B,MAPK1,SOS2,MAPK3,E2F3,CSNK1A1,NCOA3,CDKN1A,RAF1,KRAS,NOTCH2,APC,BRAF,HEY1,FRAT1,CTNNB1,MAP2K1,FOS,PIK3CD,JUN,GRB2,FRAT2,SP1
KEGG_RIG_I_LIKE_RECEPTOR_SIGNALING_PATHWAY	13/1792	71/13198	0.159515	0.300624	0.186021	13	CASP8,OTUD5,CYLD,MAVS,MAP3K1,DDX58,MAPK14,TRIM25,TANK,RELA,TBK1,TBKBP1,DDX3X
REACTOME_PLASMA_LIPOPROTEIN_ASSEMBLY_REMODELING_AND_CLEARANCE	13/1792	71/13198	0.159515	0.300624	0.186021	13	MYLIP,SOAT1,PRKACA,HDLBP,NPC2,NR1H2,PCSK6,FURIN,CLTC,ABCG1,AP2M1,ABCA1,APOBR
BIOCARTA_EIF_PATHWAY	4/1792	16/13198	0.162557	0.30407	0.188153	4	EIF4G3,EIF4G2,EIF4A2,EIF1
REACTOME_GLYCOGEN_STORAGE_DISEASES	4/1792	16/13198	0.162557	0.30407	0.188153	4	GBE1,UBC,GYG1,GAA
REACTOME_GLYCOGEN_SYNTHESIS	4/1792	16/13198	0.162557	0.30407	0.188153	4	PGM1,GBE1,UBC,GYG1
REACTOME_NRIF_SIGNALS_CELL_DEATH_FROM_THE_NUCLEUS	4/1792	16/13198	0.162557	0.30407	0.188153	4	PSEN1,UBC,NCSTN,PSENEN
REACTOME_RECYCLING_OF_BILE_ACIDS_AND_SALTS	4/1792	16/13198	0.162557	0.30407	0.188153	4	NCOA1,ABCC3,NCOA2,RXRA
REACTOME_SIGNALING_BY_ERBB2_ECD_MUTANTS	4/1792	16/13198	0.162557	0.30407	0.188153	4	HSP90AA1,GAB1,KRAS,GRB2
WP_NAD_METABOLISM	4/1792	16/13198	0.162557	0.30407	0.188153	4	NADK,SIRT2,NAMPT,NMNAT1
WP_OMEGA9_FA_SYNTHESIS	4/1792	16/13198	0.162557	0.30407	0.188153	4	ELOVL5,ACSL4,ACSL3,ACSL1
WP_PATHWAYS_OF_NUCLEIC_ACID_METABOLISM_AND_INNATE_IMMUNE_SENSING	4/1792	16/13198	0.162557	0.30407	0.188153	4	MAVS,DDX58,RNASEL,ADAR
PID_PLK1_PATHWAY	9/1792	46/13198	0.163974	0.306465	0.189635	9	PPP1R12A,RHOA,STAG2,PPP2CA,ECT2,ROCK2,RAB1A,PAK1,PPP1CB
REACTOME_RET_SIGNALING	8/1792	40/13198	0.16732	0.312459	0.193344	8	GAB2,PIK3CB,PRKACA,GRB10,GAB1,DOK4,PIK3CD,GRB2
BIOCARTA_CSK_PATHWAY	5/1792	22/13198	0.169302	0.313514	0.193997	5	PRKAR2B,CREBBP,PTPRC,PRKAR1A,PRKAR2A
REACTOME_JNK_C_JUN_KINASES_PHOSPHORYLATION_AND_ACTIVATION_MEDIATED_BY_ACTIVATED_HUMAN_TAK1	5/1792	22/13198	0.169302	0.313514	0.193997	5	TAB2,MAP2K4,RIPK2,UBC,NOD2
WP_FGF23_SIGNALLING_IN_HYPOPHOSPHATEMIC_RICKETS_AND_RELATED_DISORDERS	5/1792	22/13198	0.169302	0.313514	0.193997	5	GALNT3,SPP1,CDKN1A,KL,ALPL
WP_HOSTPATHOGEN_INTERACTION_OF_HUMAN_CORONA_VIRUSES_APOPTOSIS	5/1792	22/13198	0.169302	0.313514	0.193997	5	BID,CASP8,MAPK14,APAF1,MCL1
WP_TRANSCRIPTION_FACTOR_REGULATION_IN_ADIPOGENESIS	5/1792	22/13198	0.169302	0.313514	0.193997	5	NR3C1,CREB1,CEBPB,RXRA,CEBPD
WP_TYPE_II_DIABETES_MELLITUS	5/1792	22/13198	0.169302	0.313514	0.193997	5	PHKA2,MAPK1,PIK3R5,PRKCD,GK
REACTOME_HOST_INTERACTIONS_OF_HIV_FACTORS	22/1792	131/13198	0.169603	0.313514	0.193997	22	PSME1,NUP50,HCK,KPNB1,NUP98,KPNA1,NUP214,PSME3,DOCK2,RAC1,NUP58,ARF1,UBC,ELMO1,AP2M1,B2M,RCC1,PAK2,AP1S2,PSMB8,HLA-A,PSMB3
REACTOME_ARACHIDONIC_ACID_METABOLISM	11/1792	59/13198	0.169753	0.313514	0.193997	11	ALOX5,TBXAS1,PTGS2,PTGS1,ALOX12,PTGES3,ALOX5AP,PTGES,MAPKAPK2,DPEP2,CYP4F3
WP_MIRNA_REGULATION_OF_PROSTATE_CANCER_SIGNALING_PATHWAYS	11/1792	59/13198	0.169753	0.313514	0.193997	11	CREBBP,GSK3B,MAPK1,CDKN1B,CDKN1A,RAF1,KRAS,MDM2,CTNNB1,MAP2K1,GRB2
PID_HDAC_CLASSII_PATHWAY	7/1792	34/13198	0.169831	0.313514	0.193997	7	GNB1,HSP90AA1,NR3C1,BCL6,TUBA1B,YWHAB,GNG2
REACTOME_GLUCONEOGENESIS	7/1792	34/13198	0.169831	0.313514	0.193997	7	PGK1,GAPDH,TPI1,SLC37A2,ALDOA,FBP1,PGAM1
REACTOME_NEGATIVE_REGULATION_OF_FGFR2_SIGNALING	7/1792	34/13198	0.169831	0.313514	0.193997	7	MAPK1,MAPK3,CBL,PPP2CA,UBC,BRAF,GRB2
WP_ENDOTHELIN_PATHWAYS	7/1792	34/13198	0.169831	0.313514	0.193997	7	MYLK,MAPK1,ECE1,RAF1,CALM2,MAP2K1,PLCB1
WP_MIRNA_REGULATION_OF_P53_PATHWAY_IN_PROSTATE_CANCER	7/1792	34/13198	0.169831	0.313514	0.193997	7	BID,CASP8,APAF1,TNFRSF10B,MDM2,SHISA5,SIAH1
BIOCARTA_G1_PATHWAY	6/1792	28/13198	0.170887	0.314253	0.194454	6	GSK3B,TGFB1,CDKN1B,CDKN1A,SMAD4,TFDP1
REACTOME_PLATELET_CALCIUM_HOMEOSTASIS	6/1792	28/13198	0.170887	0.314253	0.194454	6	ATP2B4,ATP2B1,P2RX1,ORAI2,STIM1,SLC8A1
REACTOME_SIGNALING_BY_BMP	6/1792	28/13198	0.170887	0.314253	0.194454	6	ZFYVE16,UBE2D1,UBE2D3,SMAD4,SKI,FSTL1
ST_MYOCYTE_AD_PATHWAY	6/1792	28/13198	0.170887	0.314253	0.194454	6	MAPK1,ASAH1,APC,RAC1,GNAQ,CAMP
WP_SMALL_CELL_LUNG_CANCER	17/1792	98/13198	0.170929	0.314253	0.194454	17	ITGA2B,BID,BAK1,PIK3CB,CASP8,PTGS2,GADD45B,CDKN1B,E2F3,APAF1,CDKN1A,MAX,CDKN1C,PTK2,PIK3CD,RELA,RXRA
WP_MECP2_AND_ASSOCIATED_RETT_SYNDROME	13/1792	72/13198	0.171961	0.315893	0.195469	13	BCL6,CREB1,SGK1,MPP1,NCOR1,TAP1,TET2,SP3,SP1,TET3,NF1,MBP,CEBPD
REACTOME_NUCLEAR_ENVELOPE_BREAKDOWN	10/1792	53/13198	0.174904	0.321037	0.198652	10	NUP50,LPIN2,NUP98,LMNB1,NEK6,NUP214,NUP58,LMNA,PRKCB,CNEP1R1
REACTOME_PHASE_I_FUNCTIONALIZATION_OF_COMPOUNDS	18/1792	105/13198	0.175243	0.321397	0.198875	18	TBXAS1,NCOA1,PTGS1,HSP90AB1,AHR,PTGES3,ALDH2,NQO2,POR,AOC3,AOC2,CYP27A1,NCOA2,ARNT,EPHX1,ALDH1A1,RXRA,CYP4F3
KEGG_CELL_CYCLE	21/1792	125/13198	0.175932	0.322398	0.199495	21	CREBBP,GSK3B,GADD45B,EP300,STAG2,TGFB1,CDKN1B,E2F3,STAG1,CDKN1A,YWHAH,CDKN2D,CDKN1C,MDM2,SMAD4,RAD21,YWHAZ,YWHAB,CDC26,TFDP1,PRKDC
REACTOME_RNA_POLYMERASE_II_TRANSCRIPTION_TERMINATION	12/1792	66/13198	0.177898	0.324323	0.200686	12	ZC3H11A,PAPOLA,POLDIP3,THOC5,CASC3,SRSF9,SRSF4,CPSF7,SLU7,PCF11,LSM10,RBM8A
BIOCARTA_AKAP95_PATHWAY	3/1792	11/13198	0.179284	0.324323	0.200686	3	PRKAR2B,PPP2CA,PRKAR2A
BIOCARTA_CFTR_PATHWAY	3/1792	11/13198	0.179284	0.324323	0.200686	3	PRKAR2B,PRKAR1A,PRKAR2A
BIOCARTA_NPC_PATHWAY	3/1792	11/13198	0.179284	0.324323	0.200686	3	KPNB1,NUP214,RCC1
BIOCARTA_PLCE_PATHWAY	3/1792	11/13198	0.179284	0.324323	0.200686	3	PRKAR2B,PRKAR1A,PRKAR2A
KEGG_FOLATE_BIOSYNTHESIS	3/1792	11/13198	0.179284	0.324323	0.200686	3	SPR,GGH,ALPL
PID_ALK2_PATHWAY	3/1792	11/13198	0.179284	0.324323	0.200686	3	FKBP1A,ACVR1,SMAD4
REACTOME_ALPHA_PROTEIN_KINASE_1_SIGNALING_PATHWAY	3/1792	11/13198	0.179284	0.324323	0.200686	3	TAB2,ALPK1,UBC
REACTOME_DSCAM_INTERACTIONS	3/1792	11/13198	0.179284	0.324323	0.200686	3	MAPK14,RAC1,PAK1
REACTOME_ENOS_ACTIVATION	3/1792	11/13198	0.179284	0.324323	0.200686	3	HSP90AA1,SPR,DDAH2
REACTOME_SIGNALING_BY_FGFR4_IN_DISEASE	3/1792	11/13198	0.179284	0.324323	0.200686	3	GAB1,KRAS,GRB2
REACTOME_SIGNALING_BY_LEPTIN	3/1792	11/13198	0.179284	0.324323	0.200686	3	STAT3,STAT5B,SOCS3
WP_NAD_METABOLISM_SIRTUINS_AND_AGING	3/1792	11/13198	0.179284	0.324323	0.200686	3	HIF1A,NAMPT,FOXO3
WP_NONHOMOLOGOUS_END_JOINING	3/1792	11/13198	0.179284	0.324323	0.200686	3	XRCC5,LIG4,PRKDC
WP_PTF1A_RELATED_REGULATORY_PATHWAY	3/1792	11/13198	0.179284	0.324323	0.200686	3	KAT2B,CTNNB1,RBPJ
WP_SEROTONIN_TRANSPORTER_ACTIVITY	3/1792	11/13198	0.179284	0.324323	0.200686	3	IL1R1,IL1B,ITGB3
PID_DELTA_NP63_PATHWAY	9/1792	47/13198	0.179963	0.32529	0.201284	9	PPP2R5A,FOSL2,ITCH,GSK3B,HBP1,VDR,MDM2,NRG1,CEBPD
REACTOME_ORGANELLE_BIOGENESIS_AND_MAINTENANCE	46/1792	296/13198	0.180108	0.325291	0.201285	46	PRKAR2B,CREBBP,MARK4,PAFAH1B1,SDCCAG8,PRKACA,NDE1,HSP90AA1,SMARCD3,NCOA1,KIF3C,HAUS4,TUBB1,MAPRE1,TBL1X,RP2,RAB11A,TTC26,MAPK14,SOD2,MEF2D,EXOC8,CREB1,TUBA1B,B9D2,RAB3IP,TUBA4A,ACTR1A,NCOA2,NCOR1,CSNK1D,CCT5,ASAP1,PDE6D,RAB8A,TUBA1A,ARF4,MTX1,UNC119B,TBL1XR1,CEP63,TUBA8,RXRA,TUBB4B,NCOA6,BBIP1
REACTOME_DAG_AND_IP3_SIGNALING	8/1792	41/13198	0.184773	0.333184	0.206168	8	PRKAR2B,PRKACA,PRKAR1A,CAMKK2,PRKAR2A,CREB1,ADCY4,PRKCD
REACTOME_NS1_MEDIATED_EFFECTS_ON_HOST_PATHWAYS	8/1792	41/13198	0.184773	0.333184	0.206168	8	EIF2AK2,NUP50,KPNB1,NUP98,KPNA1,NUP214,NUP58,KPNA4
WP_WNT_SIGNALING_PATHWAY_AND_PLURIPOTENCY	18/1792	106/13198	0.18593	0.335	0.207292	18	NFYA,CREBBP,PAFAH1B1,CD44,MAP2K4,RHOA,GSK3B,EP300,PPP2CA,APC,PRKCD,FRAT1,PRKCB,CTNNB1,CTBP2,JUN,LRRK2,PPP2R2A
KEGG_REGULATION_OF_AUTOPHAGY	7/1792	35/13198	0.189067	0.340381	0.210622	7	GABARAPL2,PIK3C3,PRKAA1,GABARAPL1,ATG3,GABARAP,ATG7
KEGG_OOCYTE_MEIOSIS	19/1792	113/13198	0.189569	0.340741	0.210845	19	SLK,PPP2R5A,PPP2R5B,PRKACA,MAPK1,MAPK3,PPP2CA,RPS6KA1,YWHAH,ADCY4,PPP3CA,CALM2,CALM3,YWHAZ,YWHAB,MAP2K1,CDC26,CHP1,PPP1CB
REACTOME_HEDGEHOG_OFF_STATE	19/1792	113/13198	0.189569	0.340741	0.210845	19	PRKAR2B,PRKACA,ITCH,GSK3B,PSME1,TUBB1,PRKAR1A,CSNK1A1,PRKAR2A,TUBA1B,TUBA4A,ADCY4,PSME3,NUMB,UBC,TUBA1A,TUBB4B,PSMB8,PSMB3
BIOCARTA_ETS_PATHWAY	4/1792	17/13198	0.191113	0.342151	0.211717	4	ETS2,FOS,JUN,CSF1R
REACTOME_BUTYRATE_RESPONSE_FACTOR_1_BRF1_BINDS_AND_DESTABILIZES_MRNA	4/1792	17/13198	0.191113	0.342151	0.211717	4	MAPKAPK2,YWHAB,DCP2,ZFP36L1
REACTOME_HYALURONAN_METABOLISM	4/1792	17/13198	0.191113	0.342151	0.211717	4	CD44,HEXB,LYVE1,CHP1
REACTOME_TRISTETRAPROLIN_TTP_ZFP36_BINDS_AND_DESTABILIZES_MRNA	4/1792	17/13198	0.191113	0.342151	0.211717	4	ZFP36,MAPKAPK2,YWHAB,DCP2
REACTOME_VITAMIN_B5_PANTOTHENATE_METABOLISM	4/1792	17/13198	0.191113	0.342151	0.211717	4	VNN1,VNN2,PANK2,PANK4
KEGG_ADIPOCYTOKINE_SIGNALING_PATHWAY	12/1792	67/13198	0.191689	0.342911	0.212187	12	ADIPOR2,TNFRSF1B,TNFRSF1A,ACSL4,CAMKK2,ACSL3,PRKAA1,ACSL1,STAT3,RELA,SOCS3,RXRA
WP_LIPID_METABOLISM_PATHWAY	6/1792	29/13198	0.192361	0.343567	0.212593	6	PRKAR2B,ABHD5,PRKACA,PRKAR1A,PRKAR2A,PRKAA1
WP_TCELL_RECEPTOR_AND_COSTIMULATORY_SIGNALING	6/1792	29/13198	0.192361	0.343567	0.212593	6	GSK3B,CSNK1A1,PPP3CA,CALM2,DYRK1A,CTLA4
REACTOME_CLEC7A_DECTIN_1_SIGNALING	17/1792	100/13198	0.193114	0.344638	0.213256	17	TAB2,CASP8,UBE2D1,PSME1,IL1B,UBE2M,PSME3,PPP3CA,BCL10,UBC,PRKCD,SYK,CLEC7A,RELA,PLCG2,PSMB8,PSMB3
BIOCARTA_TH1TH2_PATHWAY	5/1792	23/13198	0.193719	0.344899	0.213418	5	IFNGR1,IL12RB2,CD86,IL18R1,IFNGR2
WP_CANCER_IMMUNOTHERAPY_BY_PD1_BLOCKADE	5/1792	23/13198	0.193719	0.344899	0.213418	5	NFAT5,CD274,STAT3,JUN,HLA-A
WP_NRF2ARE_REGULATION	5/1792	23/13198	0.193719	0.344899	0.213418	5	CUL3,GSK3B,HMOX1,NFE2L2,CEBPB
REACTOME_INOSITOL_PHOSPHATE_METABOLISM	9/1792	48/13198	0.19662	0.349512	0.216272	9	ITPK1,PLCB3,IPMK,SYNJ1,INPPL1,INPP5D,IP6K1,PLCB1,PLCG2
WP_MECHANOREGULATION_AND_PATHOLOGY_OF_YAPTAZ_VIA_HIPPO_AND_NONHIPPO_MECHANISMS	9/1792	48/13198	0.19662	0.349512	0.216272	9	CTNNA1,MAP4K4,ITGB5,PAK1,ITGB2,CTNNB1,PAK2,SGMS1,ITGB3
REACTOME_CILIUM_ASSEMBLY	32/1792	202/13198	0.197547	0.350883	0.21712	32	PRKAR2B,MARK4,PAFAH1B1,SDCCAG8,PRKACA,NDE1,HSP90AA1,KIF3C,HAUS4,TUBB1,MAPRE1,RP2,RAB11A,TTC26,EXOC8,TUBA1B,B9D2,RAB3IP,TUBA4A,ACTR1A,CSNK1D,CCT5,ASAP1,PDE6D,RAB8A,TUBA1A,ARF4,UNC119B,CEP63,TUBA8,TUBB4B,BBIP1
REACTOME_KINESINS	11/1792	61/13198	0.198801	0.352832	0.218326	11	KIF1B,KIF3C,TUBB1,TUBA1B,TUBA4A,KIF1C,KIF27,TUBA1A,KIF5B,TUBA8,TUBB4B
REACTOME_RHO_GTPASES_ACTIVATE_PKNS	16/1792	94/13198	0.200691	0.355907	0.220229	16	PPP1R12A,PKN2,RHOA,PPP1R12B,MYL6,MYH9,MYL9,MYL12B,YWHAH,RAC1,NCOA2,RHOB,PAK1,YWHAZ,YWHAB,PPP1CB
WP_GENES_INVOLVED_IN_MALE_INFERTILITY	25/1792	155/13198	0.204813	0.362932	0.224576	25	CREBBP,UBR2,PUM2,POLB,XRCC5,CCNK,EP300,MMP9,AHR,SOD2,KDM3A,NFE2L2,UBE2B,CLU,CAT,AGO2,ARNTL,MDM2,THBS1,USP8,XPC,CHD2,LIG4,TCN2,SIRPA
WP_AMPACTIVATED_PROTEIN_KINASE_AMPK_SIGNALING	12/1792	68/13198	0.205953	0.364664	0.225648	12	ADIPOR2,PIK3CB,PIK3C3,PIK3CG,CAMKK2,HMGCR,CDKN1A,PRKAA1,CAB39,PFKFB3,PIK3CD,PLCB1
REACTOME_HCMV_INFECTION	26/1792	162/13198	0.206557	0.365447	0.226132	26	TSG101,NUP50,TUBB1,TBL1X,CBX1,NUP98,CHMP3,CREB1,TUBA1B,NUP214,TUBA4A,CHMP2A,DYNC1LI2,NUP58,VPS37B,NCOR1,DYNC1LI1,VPS37A,UBAP1,HNRNPK,TUBA1A,VPS37C,TBL1XR1,TUBA8,TUBB4B,CEBPD
WP_THERMOGENESIS	18/1792	108/13198	0.208242	0.36814	0.227799	18	ACSL4,PRKACA,SMARCD3,SOS2,ZNF516,MAPK14,KDM3A,RPS6KA1,CREB1,KDM3B,ACSL3,ADCY4,PRKAA1,KRAS,CREB5,ACSL1,GRB2,MAP3K5
REACTOME_DISEASES_OF_MITOTIC_CELL_CYCLE	7/1792	36/13198	0.209134	0.369426	0.228595	7	UBE2D1,CDKN1B,E2F3,CDKN1A,CDKN1C,CDC26,TFDP1
REACTOME_ANTIGEN_PROCESSING_UBIQUITINATION_PROTEASOME_DEGRADATION	47/1792	308/13198	0.213224	0.376356	0.232882	47	MYLIP,UBR2,RNF19A,CUL3,UBE2D1,UBE2A,ITCH,PSME1,UBE2W,UBE2R2,UBE2D3,KLHL2,RNF130,RNF19B,FBXL5,UBE2B,AREL1,KBTBD7,RNF114,UBE2M,UBA1,RLIM,PSME3,TRIM21,MKRN1,FBXO11,HECW2,NPEPPS,HERC4,UBC,TRIP12,UBE2L6,RNF111,FBXL13,DTX3L,CDC26,RNF41,ASB7,SOCS3,UBE2L3,TRIM69,UBE2H,SIAH1,ATG7,PJA2,PSMB8,PSMB3
REACTOME_FOXO_MEDIATED_TRANSCRIPTION_OF_OXIDATIVE_STRESS_METABOLIC_AND_NEURONAL_GENES	6/1792	30/13198	0.21479	0.377378	0.233515	6	SOD2,NR3C1,FOXO3,CAT,SMAD4,FOXO4
REACTOME_REGULATION_OF_TP53_ACTIVITY_THROUGH_ACETYLATION	6/1792	30/13198	0.21479	0.377378	0.233515	6	KAT6A,BRPF3,EP300,CHD4,GATAD2B,ING2
REACTOME_TNFR1_INDUCED_NFKAPPAB_SIGNALING_PATHWAY	6/1792	30/13198	0.21479	0.377378	0.233515	6	TAB2,TNFRSF1A,CYLD,USP4,TNFAIP3,UBC
BIOCARTA_ACTINY_PATHWAY	3/1792	12/13198	0.216314	0.377378	0.233515	3	WASF3,RAC1,WASF2
BIOCARTA_BARRESTIN_PATHWAY	3/1792	12/13198	0.216314	0.377378	0.233515	3	ARRB1,AP2M1,PLCB1
BIOCARTA_HES_PATHWAY	3/1792	12/13198	0.216314	0.377378	0.233515	3	GSK3B,NOTCH2,RBPJ
REACTOME_GAP_JUNCTION_DEGRADATION	3/1792	12/13198	0.216314	0.377378	0.233515	3	DNM2,CLTC,AP2M1
REACTOME_INTERLEUKIN_35_SIGNALLING	3/1792	12/13198	0.216314	0.377378	0.233515	3	IL12RB2,JAK1,STAT3
REACTOME_KILLING_MECHANISMS	3/1792	12/13198	0.216314	0.377378	0.233515	3	CYBA,RAC1,JUN
REACTOME_REDUCTION_OF_CYTOSOLIC_CA_LEVELS	3/1792	12/13198	0.216314	0.377378	0.233515	3	ATP2B4,ATP2B1,SLC8A1
REACTOME_TICAM1_DEPENDENT_ACTIVATION_OF_IRF3_IRF7	3/1792	12/13198	0.216314	0.377378	0.233515	3	TANK,UBC,TBK1
WP_BONE_MORPHOGENIC_PROTEIN_BMP_SIGNALLING_AND_REGULATION	3/1792	12/13198	0.216314	0.377378	0.233515	3	TOB1,SMAD4,TOB2
WP_IRON_METABOLISM_IN_PLACENTA	3/1792	12/13198	0.216314	0.377378	0.233515	3	MCOLN1,SLC40A1,FTH1
WP_MAPK_AND_NFKB_SIGNALLING_PATHWAYS_INHIBITED_BY_YERSINIA_YOPJ	3/1792	12/13198	0.216314	0.377378	0.233515	3	MAP3K1,MAPK1,RAF1
WP_NANOPARTICLE_TRIGGERED_REGULATED_NECROSIS	3/1792	12/13198	0.216314	0.377378	0.233515	3	CASP8,TNFRSF1A,FTL
REACTOME_TRANSCRIPTIONAL_REGULATION_BY_RUNX1	37/1792	239/13198	0.217472	0.379105	0.234584	37	CREBBP,KMT2E,ITGA2B,YAF2,KMT2C,SPI1,ITCH,SMARCD3,PSME1,AGO1,TNRC6B,EP300,MYL9,ELF2,KAT2B,RBBP5,ELF1,NFE2,AGO2,AGO3,PSME3,PHC2,AGO4,LMO2,THBS1,UBC,TAL1,CTLA4,RYBP,PF4,PRKCB,CLDN5,SOCS3,GP1BA,CR1,PSMB8,PSMB3
KEGG_NICOTINATE_AND_NICOTINAMIDE_METABOLISM	5/1792	24/13198	0.219267	0.381349	0.235972	5	NADK,NT5C2,NAMPT,BST1,NMNAT1
REACTOME_OTHER_INTERLEUKIN_SIGNALING	5/1792	24/13198	0.219267	0.381349	0.235972	5	STXBP2,JAK1,STX3,CSF1R,IL10RB
WP_GLYCEROLIPIDS_AND_GLYCEROPHOSPHOLIPIDS	5/1792	24/13198	0.219267	0.381349	0.235972	5	AGPAT4,DGAT2,PCYT1A,DGAT1,PISD
REACTOME_ION_CHANNEL_TRANSPORT	29/1792	184/13198	0.219739	0.381874	0.236297	29	ATP6V0A1,ATP9A,ATP11B,ATP2B4,WNK1,ATP11A,ATP1B3,ATP2B1,CLCN4,OSTM1,MCOLN1,ATP6V1D,ATP6V0E1,ATP6V1A,ATP6V0B,SGK1,TRPM6,ATP6V1E1,RAF1,TTYH3,ATP6V1B2,UBC,TSC22D3,ATP6V0D1,ANO10,TPCN2,ATP7A,MLKL,ANO6
WP_DNA_DAMAGE_RESPONSE	12/1792	69/13198	0.220662	0.382149	0.236467	12	BID,RRM2B,CASP8,GADD45B,CDKN1B,CREB1,APAF1,TNFRSF10B,CDKN1A,MDM2,TLK2,PRKDC
BIOCARTA_CHEMICAL_PATHWAY	4/1792	18/13198	0.221083	0.382149	0.236467	4	BID,APAF1,TLN1,PRKCB
REACTOME_DISEASES_ASSOCIATED_WITH_GLYCOSYLATION_PRECURSOR_BIOSYNTHESIS	4/1792	18/13198	0.221083	0.382149	0.236467	4	CTSA,PGM1,GLB1,NEU1
REACTOME_METABOLISM_OF_ANGIOTENSINOGEN_TO_ANGIOTENSINS	4/1792	18/13198	0.221083	0.382149	0.236467	4	CTSZ,CTSD,ATP6AP2,MME
REACTOME_PRE_NOTCH_PROCESSING_IN_GOLGI	4/1792	18/13198	0.221083	0.382149	0.236467	4	SEL1L,ST3GAL4,NOTCH2,FURIN
REACTOME_SYNTHESIS_OF_PIPS_AT_THE_GOLGI_MEMBRANE	4/1792	18/13198	0.221083	0.382149	0.236467	4	PIK3C3,PIKFYVE,ARF3,ARF1
WP_NOTCH1_REGULATION_OF_HUMAN_ENDOTHELIAL_CELL_CALCIFICATION	4/1792	18/13198	0.221083	0.382149	0.236467	4	JAG1,VEGFA,SAT1,ALPL
REACTOME_CARBOXYTERMINAL_POST_TRANSLATIONAL_MODIFICATIONS_OF_TUBULIN	8/1792	43/13198	0.221839	0.38316	0.237093	8	TUBB1,TUBA1B,TUBA4A,AGTPBP1,TTLL4,TUBA1A,TUBA8,TUBB4B
REACTOME_PEROXISOMAL_PROTEIN_IMPORT	11/1792	63/13198	0.229853	0.395049	0.24445	11	UBE2D1,ZFAND6,UBE2D3,CAT,USP9X,HSD17B4,IDH1,UBC,ACOX1,PEX13,AMACR
REACTOME_SYNTHESIS_OF_SUBSTRATES_IN_N_GLYCAN_BIOSYTHESIS	11/1792	63/13198	0.229853	0.395049	0.24445	11	CTSA,ST6GALNAC2,NANS,ST3GAL4,ST8SIA4,NAGK,NPL,ST3GAL2,GLB1,ST6GALNAC3,NEU1
PID_IL23_PATHWAY	7/1792	37/13198	0.229949	0.395049	0.24445	7	IL18R1,IL18RAP,IL1B,CXCL1,STAT3,RELA,SOCS3
REACTOME_REGULATION_OF_TP53_EXPRESSION_AND_DEGRADATION	7/1792	37/13198	0.229949	0.395049	0.24445	7	PHF20,RFFL,PPP2CA,SGK1,MDM2,UBC,RICTOR
WP_INITIATION_OF_TRANSCRIPTION_AND_TRANSLATION_ELONGATION_AT_THE_HIV1_LTR	7/1792	37/13198	0.229949	0.395049	0.24445	7	CREBBP,EP300,PPP3CA,RELA,SP1,HEXIM1,SUPT4H1
WP_OVERVIEW_OF_INTERFERONSMEDIATED_SIGNALING_PATHWAY	7/1792	37/13198	0.229949	0.395049	0.24445	7	IFNGR1,IFNAR1,IFNAR2,IFNGR2,JAK1,STAT2,IL10RB
WP_TARGET_OF_RAPAMYCIN_TOR_SIGNALING	7/1792	37/13198	0.229949	0.395049	0.24445	7	RRAGD,CDC42,FKBP1A,HMGCR,PRKAA1,RAC1,RICTOR
REACTOME_NETRIN_1_SIGNALING	9/1792	50/13198	0.231747	0.397836	0.246174	9	CDC42,MAPK14,AGAP2,RAC1,PAK1,PTK2,ABLIM3,PITPNA,SIAH1
REACTOME_TCR_SIGNALING	20/1792	124/13198	0.236504	0.405692	0.251036	20	WAS,LCP2,PIK3CB,TAB2,UBE2D1,PTPRC,PSME1,RIPK2,VASP,PSME3,BCL10,PTPRJ,PAK1,UBC,INPP5D,RELA,PAK2,PLCG2,PSMB8,PSMB3
REACTOME_FGFR1_MUTANT_RECEPTOR_ACTIVATION	6/1792	31/13198	0.238054	0.40804	0.252488	6	GAB2,LRRFIP1,STAT3,STAT5B,GRB2,CUX1
WP_CIRCADIAN_RHYTHM_RELATED_GENES	32/1792	207/13198	0.239912	0.410913	0.254266	32	THRAP3,KDM5A,PHLPP1,GSK3B,CREM,EP300,PRMT5,NAMPT,AHR,SETX,CREB1,JUND,PRKAA1,ARNTL,BHLHE40,ROCK2,NCOA2,NCOR1,CSNK1D,ARNT,UBC,HNRNPU,KLF10,GNAQ,DYRK1A,PROK2,NFIL3,RBM4,JUN,TOP1,PPP1CB,PRKDC
PID_INSULIN_PATHWAY	8/1792	44/13198	0.241323	0.41239	0.25518	8	PARD6A,GRB10,CBL,SGK1,FOXO3,SH2B2,CRK,GRB2
REACTOME_SPHINGOLIPID_DE_NOVO_BIOSYNTHESIS	8/1792	44/13198	0.241323	0.41239	0.25518	8	SPTLC1,SPTLC2,VAPA,CERS2,DEGS1,SAMD8,SGMS2,SGMS1
WP_HEDGEHOG_SIGNALING_PATHWAY	8/1792	44/13198	0.241323	0.41239	0.25518	8	CUL3,PRKACA,CSNK1A1,SPOP,ARRB1,ARRB2,CSNK1D,SPOPL
REACTOME_PROCESSING_OF_CAPPED_INTRON_CONTAINING_PRE_MRNA	37/1792	242/13198	0.241539	0.412446	0.255214	37	RBM5,POLR2J,ZC3H11A,RBM22,PAPOLA,HNRNPC,NUP50,CDC5L,SF3A1,POLDIP3,THOC5,CRNKL1,POLR2C,BUD31,CASC3,HSPA8,NUP98,SRSF9,SF3B6,SF3B1,SRSF4,SYF2,SMNDC1,NUP214,HNRNPH2,NUP58,WTAP,CPSF7,HNRNPU,SLU7,HNRNPK,PCF11,PCBP1,PCBP2,ISY1,RBM8A,CWC25
REACTOME_O_LINKED_GLYCOSYLATION	18/1792	111/13198	0.24388	0.416129	0.257493	18	ST6GALNAC2,ADAMTS2,C1GALT1,GALNT7,ST3GAL4,GALNT3,CFP,THBS1,GALNT1,B3GNT7,ST3GAL2,GALNT14,B4GALT5,GALNT10,B3GNT2,B3GNTL1,B3GNT5,ST6GALNAC3
KEGG_SMALL_CELL_LUNG_CANCER	14/1792	84/13198	0.24493	0.417603	0.258406	14	ITGA2B,PIAS1,PIK3CB,PTGS2,PIK3CG,CDKN1B,E2F3,APAF1,MAX,PIK3R5,PTK2,PIK3CD,RELA,RXRA
WP_ESC_PLURIPOTENCY_PATHWAYS	19/1792	118/13198	0.246108	0.419295	0.259453	19	GSK3B,MAPK1,GAB1,ACVR1,FGF13,RAF1,APC,MDM2,ACTR2,SMAD4,BRAF,JAK1,CTNNB1,STAT3,MAP2K1,FOS,PIK3CD,JUN,GRB2
REACTOME_GAP_JUNCTION_TRAFFICKING_AND_REGULATION	9/1792	51/13198	0.250115	0.42576	0.263453	9	DNM2,TUBB1,TUBA1B,TUBA4A,CLTC,AP2M1,TUBA1A,TUBA8,TUBB4B
REACTOME_MOLECULES_ASSOCIATED_WITH_ELASTIC_FIBRES	7/1792	38/13198	0.251423	0.42576	0.263453	7	LTBP1,ITGB5,TGFB1,EMILIN2,FBN2,MFAP1,ITGB3
REACTOME_TRANSCRIPTIONAL_REGULATION_BY_THE_AP_2_TFAP2_FAMILY_OF_TRANSCRIPTION_FACTORS	7/1792	38/13198	0.251423	0.42576	0.263453	7	CREBBP,EP300,YY1,VEGFA,KDM5B,CDKN1A,TGFA
BIOCARTA_IL12_PATHWAY	4/1792	19/13198	0.252169	0.42576	0.263453	4	IL12RB2,MAPK14,IL18R1,JUN
BIOCARTA_MITOCHONDRIA_PATHWAY	4/1792	19/13198	0.252169	0.42576	0.263453	4	BID,BAK1,CASP8,APAF1
BIOCARTA_PROTEASOME_PATHWAY	4/1792	19/13198	0.252169	0.42576	0.263453	4	UBE2A,UBA1,RPN1,PSMB3
REACTOME_BIOSYNTHESIS_OF_SPECIALIZED_PRORESOLVING_MEDIATORS_SPMS_	4/1792	19/13198	0.252169	0.42576	0.263453	4	ALOX5,PTGS2,ALOX12,ALOX5AP
REACTOME_GABA_SYNTHESIS_RELEASE_REUPTAKE_AND_DEGRADATION	4/1792	19/13198	0.252169	0.42576	0.263453	4	DNAJC5,HSPA8,SLC6A12,ABAT
REACTOME_LDL_CLEARANCE	4/1792	19/13198	0.252169	0.42576	0.263453	4	SOAT1,NPC2,CLTC,AP2M1
REACTOME_METABOLISM_OF_COFACTORS	4/1792	19/13198	0.252169	0.42576	0.263453	4	HSP90AA1,SPR,IDH1,COQ2
REACTOME_NICOTINAMIDE_SALVAGING	4/1792	19/13198	0.252169	0.42576	0.263453	4	PTGS2,NAMPT,PARP9,PARP8
REACTOME_VEGFR2_MEDIATED_CELL_PROLIFERATION	4/1792	19/13198	0.252169	0.42576	0.263453	4	VEGFA,KRAS,PRKCD,PRKCB
BIOCARTA_CTL_PATHWAY	3/1792	13/13198	0.254721	0.426554	0.263944	3	ITGB2,B2M,HLA-A
BIOCARTA_P27_PATHWAY	3/1792	13/13198	0.254721	0.426554	0.263944	3	CDKN1B,UBE2M,TFDP1
KEGG_CIRCADIAN_RHYTHM_MAMMAL	3/1792	13/13198	0.254721	0.426554	0.263944	3	ARNTL,BHLHE40,CSNK1D
KEGG_NON_HOMOLOGOUS_END_JOINING	3/1792	13/13198	0.254721	0.426554	0.263944	3	XRCC5,LIG4,PRKDC
REACTOME_APOPTOSIS_INDUCED_DNA_FRAGMENTATION	3/1792	13/13198	0.254721	0.426554	0.263944	3	KPNB1,KPNA1,HMGB2
REACTOME_CHK1_CHK2_CDS1_MEDIATED_INACTIVATION_OF_CYCLIN_B_CDK1_COMPLEX	3/1792	13/13198	0.254721	0.426554	0.263944	3	YWHAH,YWHAZ,YWHAB
REACTOME_ERBB2_ACTIVATES_PTK6_SIGNALING	3/1792	13/13198	0.254721	0.426554	0.263944	3	HBEGF,EREG,NRG1
REACTOME_SYNTHESIS_OF_PE	3/1792	13/13198	0.254721	0.426554	0.263944	3	LPIN2,PHOSPHO1,PISD
WP_BILE_ACIDS_SYNTHESIS_AND_ENTEROHEPATIC_CIRCULATION	3/1792	13/13198	0.254721	0.426554	0.263944	3	MAPK1,MAPK3,FXR1
WP_CONTROL_OF_IMMUNE_TOLERANCE_BY_VASOACTIVE_INTESTINAL_PEPTIDE	3/1792	13/13198	0.254721	0.426554	0.263944	3	TGFB1,CD86,CTLA4
WP_TRANSCRIPTIONAL_CASCADE_REGULATING_ADIPOGENESIS	3/1792	13/13198	0.254721	0.426554	0.263944	3	CEBPB,DDIT3,CEBPD
REACTOME_MRNA_SPLICING	29/1792	188/13198	0.256994	0.429833	0.265973	29	RBM5,POLR2J,RBM22,PAPOLA,HNRNPC,CDC5L,SF3A1,CRNKL1,POLR2C,BUD31,CASC3,HSPA8,SRSF9,SF3B6,SF3B1,SRSF4,SYF2,SMNDC1,HNRNPH2,CPSF7,HNRNPU,SLU7,HNRNPK,PCF11,PCBP1,PCBP2,ISY1,RBM8A,CWC25
REACTOME_CHEMOKINE_RECEPTORS_BIND_CHEMOKINES	10/1792	58/13198	0.257061	0.429833	0.265973	10	CCR2,CXCL16,CXCR1,CXCL5,PPBP,PF4,CXCL1,CCR1,CXCR2,CCR4
REACTOME_ANTI_INFLAMMATORY_RESPONSE_FAVOURING_LEISHMANIA_PARASITE_INFECTION	34/1792	223/13198	0.258205	0.431426	0.266959	34	FGR,PRKAR2B,GNAI3,PRKACA,GNB1,MYH9,HCK,PRKAR1A,MAPK14,HRH2,PRKAR2A,GNAI2,GNB4,CREB1,GNG11,GNAZ,ADCY4,FURIN,FCGR2A,ADM,FCGR1A,ADAM17,CYSLTR2,SYK,DPEP2,GPR27,GNB2,CYSLTR1,GNG5,GNG2,PLCG2,FCGR3A,INSL3,LYN
REACTOME_TAK1_ACTIVATES_NFKB_BY_PHOSPHORYLATION_AND_ACTIVATION_OF_IKKS_COMPLEX	6/1792	32/13198	0.262029	0.437168	0.270512	6	TAB2,RIPK2,UBC,S100A12,NOD2,RELA
WP_MONOAMINE_TRANSPORT	6/1792	32/13198	0.262029	0.437168	0.270512	6	SYN1,MAPK14,IL1R1,IL1B,NECTIN2,ITGB3
REACTOME_CELL_CELL_JUNCTION_ORGANIZATION	11/1792	65/13198	0.262638	0.437212	0.270539	11	CTNNA1,PVR,PARD6A,NECTIN1,NECTIN2,PARD3,F11R,CTNNB1,CDH2,CLDN5,ANG
WP_ENDOCHONDRAL_OSSIFICATION	11/1792	65/13198	0.262638	0.437212	0.270539	11	PRKACA,MMP9,TGFB1,VEGFA,SPP1,CDKN1C,CAB39,CALM2,ALPL,CHST11,STAT5B
WP_ENDOCHONDRAL_OSSIFICATION_WITH_SKELETAL_DYSPLASIAS	11/1792	65/13198	0.262638	0.437212	0.270539	11	PRKACA,MMP9,TGFB1,VEGFA,SPP1,CDKN1C,CAB39,CALM2,ALPL,CHST11,STAT5B
WP_3Q29_COPY_NUMBER_VARIATION_SYNDROME	13/1792	79/13198	0.270885	0.450609	0.278829	13	PXN,HIF1A,TGFB1,ADAM10,SLC40A1,DYNLT1,PCYT1A,UBXN7,STAT5B,CEP19,JUN,GRB2,PAK2
REACTOME_REGULATION_OF_IFNA_SIGNALING	5/1792	26/13198	0.273034	0.453515	0.280627	5	IFNAR1,IFNAR2,JAK1,STAT2,SOCS3
WP_WNTBETACATENIN_SIGNALING_PATHWAY_IN_LEUKEMIA	5/1792	26/13198	0.273034	0.453515	0.280627	5	GSK3B,CSNK1A1,RARA,APC,CTNNB1
REACTOME_SUMOYLATION_OF_UBIQUITINYLATION_PROTEINS	7/1792	39/13198	0.273464	0.453894	0.280862	7	PIAS1,NUP50,NUP98,NUP214,MDM2,NUP58,TRIM27
REACTOME_HEDGEHOG_ON_STATE	14/1792	86/13198	0.27395	0.454366	0.281154	14	CUL3,ITCH,PSME1,CSNK1A1,SPOP,PSME3,NUMB,CDC73,ARRB1,ARRB2,SPOPL,UBC,PSMB8,PSMB3
REACTOME_SIGNALING_BY_FGFR2	12/1792	73/13198	0.283359	0.469626	0.290597	12	POLR2J,MAPK1,MAPK3,POLR2C,GAB1,CBL,PPP2CA,TIA1,KRAS,UBC,BRAF,GRB2
BIOCARTA_ATM_PATHWAY	4/1792	20/13198	0.284076	0.469777	0.29069	4	CDKN1A,MDM2,RELA,JUN
REACTOME_SUMOYLATION_OF_TRANSCRIPTION_FACTORS	4/1792	20/13198	0.284076	0.469777	0.29069	4	PIAS1,TP53BP1,MDM2,SP3
WP_TP53_NETWORK	4/1792	20/13198	0.284076	0.469777	0.29069	4	BID,TNFSF10,CDKN1A,MDM2
REACTOME_MUSCLE_CONTRACTION	31/1792	205/13198	0.2862	0.472895	0.292619	31	VIM,VCL,ATP2B4,MYLK,ATP1B3,ATP2B1,PRKACA,ITGB5,PXN,MYL6,MYL9,MYL12A,KAT2B,MYL12B,KCNJ2,TMOD2,FGF13,ANXA1,DYSF,TLN1,TMOD3,TPM3,PAK1,ORAI2,HIPK1,STIM1,TPM4,KCNE3,PAK2,KCNE1,SLC8A1
WP_GASTRIC_CANCER_NETWORK_2	6/1792	33/13198	0.28659	0.472895	0.292619	6	OTUD5,LBR,AHCTF1,CTNNB1,FAM91A1,S100A6
WP_PREGNANE_X_RECEPTOR_PATHWAY	6/1792	33/13198	0.28659	0.472895	0.292619	6	HSP90AA1,NCOA1,ABCC3,NCOA3,NCOA2,RXRA
REACTOME_SIGNALING_BY_FGFR	14/1792	87/13198	0.288877	0.476319	0.294738	14	POLR2J,MAPK1,MAPK3,POLR2C,GAB1,CBL,PPP2CA,GALNT3,TIA1,KL,KRAS,UBC,BRAF,GRB2
BIOCARTA_LYM_PATHWAY	3/1792	14/13198	0.293953	0.481869	0.298172	3	ITGB2,SELL,PECAM1
KEGG_GLYCOSPHINGOLIPID_BIOSYNTHESIS_GLOBO_SERIES	3/1792	14/13198	0.293953	0.481869	0.298172	3	HEXB,GLA,ST3GAL2
REACTOME_ADENYLATE_CYCLASE_INHIBITORY_PATHWAY	3/1792	14/13198	0.293953	0.481869	0.298172	3	GNAI3,GNAI2,ADCY4
REACTOME_EARLY_PHASE_OF_HIV_LIFE_CYCLE	3/1792	14/13198	0.293953	0.481869	0.298172	3	XRCC5,KPNA1,LIG4
REACTOME_REGULATION_OF_TP53_ACTIVITY_THROUGH_ASSOCIATION_WITH_CO_FACTORS	3/1792	14/13198	0.293953	0.481869	0.298172	3	PHF20,ZNF385A,BANP
REACTOME_REPRESSION_OF_WNT_TARGET_GENES	3/1792	14/13198	0.293953	0.481869	0.298172	3	TLE4,TLE3,CTBP2
REACTOME_SEMA3A_PLEXIN_REPULSION_SIGNALING_BY_INHIBITING_INTEGRIN_ADHESION	3/1792	14/13198	0.293953	0.481869	0.298172	3	PLXNA2,RAC1,TLN1
REACTOME_TRAF6_MEDIATED_IRF7_ACTIVATION_IN_TLR7_8_OR_9_SIGNALING	3/1792	14/13198	0.293953	0.481869	0.298172	3	TLR8,UBC,TLR9
WP_CELL_CYCLE	19/1792	122/13198	0.295671	0.484135	0.299575	19	GSK3B,GADD45B,EP300,STAG2,TGFB1,CDKN1B,E2F3,STAG1,CDKN1A,YWHAH,CDKN2D,CDKN1C,MDM2,SMAD4,RAD21,YWHAZ,YWHAB,TFDP1,PRKDC
WP_ATM_SIGNALING_PATHWAY	7/1792	40/13198	0.29598	0.484135	0.299575	7	BID,TP53BP1,CREB1,CDKN1A,MDM2,CRADD,JUN
WP_MBDNF_AND_PROBDNF_REGULATION_OF_GABA_NEUROTRANSMISSION	7/1792	40/13198	0.29598	0.484135	0.299575	7	PIK3CB,RHOA,ROCK1,CREM,PIK3CG,CREB1,STAT3
KEGG_ARRHYTHMOGENIC_RIGHT_VENTRICULAR_CARDIOMYOPATHY_ARVC	12/1792	74/13198	0.299836	0.490087	0.303258	12	ITGA2B,CTNNA1,ACTN1,ITGB5,ACTN4,DSC2,LMNA,ITGA5,CTNNB1,CDH2,SLC8A1,ITGB3
REACTOME_POSTMITOTIC_NUCLEAR_PORE_COMPLEX_NPC_REFORMATION	5/1792	27/13198	0.300888	0.49145	0.304101	5	KPNB1,NUP98,NUP58,AHCTF1,RCC1
WP_THYROID_HORMONES_PRODUCTION_AND_THEIR_PERIPHERAL_DOWNSTREAM_SIGNALLING_EFFECTS	15/1792	95/13198	0.305498	0.498619	0.308537	15	PRKACA,GSK3B,MAPK1,ZNF516,MAPK14,MAPKAPK3,KDM3B,RAF1,MDM2,CTNNB1,MAP2K1,GRB2,PLCB1,RXRA,ITGB3
REACTOME_NUCLEAR_IMPORT_OF_REV_PROTEIN	6/1792	34/13198	0.31161	0.507859	0.314254	6	NUP50,KPNB1,NUP98,NUP214,NUP58,RCC1
SIG_CD40PATHWAYMAP	6/1792	34/13198	0.31161	0.507859	0.314254	6	MAP2K4,MAPK1,MAPK3,MAPK14,DUSP1,PIK3CD
PID_P75_NTR_PATHWAY	11/1792	68/13198	0.314393	0.512024	0.316832	11	RHOA,PSEN1,RIPK2,RTN4,APAF1,RAC1,FURIN,RHOB,ADAM17,NCSTN,PSENEN
REACTOME_TP53_REGULATES_TRANSCRIPTION_OF_ADDITIONAL_CELL_CYCLE_GENES_WHOSE_EXACT_ROLE_IN_THE_P53_PATHWAY_REMAIN_UNCERTAIN	4/1792	21/13198	0.316519	0.515115	0.318745	4	CNOT6,CNOT8,BTG2,PLK3
REACTOME_MET_PROMOTES_CELL_MOTILITY	7/1792	41/13198	0.318875	0.518575	0.320885	7	CRKL,GAB1,RAP1A,RAC1,CRK,PTK2,GRB2
WNT_SIGNALING	14/1792	89/13198	0.319429	0.518727	0.32098	14	GSK3B,EP300,GAPDH,PPP2CA,CSNK1A1,APC,CSNK1D,SENP2,FRAT1,B2M,CTNNB1,CTBP2,JUN,KREMEN1
WP_ALLOGRAFT_REJECTION	14/1792	89/13198	0.319429	0.518727	0.32098	14	VIM,CASP8,TGFB1,VEGFA,CD86,TUBA1B,IL1B,CTLA4,LRRK2,CD55,HLA-C,HLA-E,HLA-A,HLA-B
WP_WNT_SIGNALING	18/1792	117/13198	0.321531	0.521764	0.322859	18	RHOA,GSK3B,CSNK1A1,ROCK2,APC,RAC1,PPP3CA,DAAM2,PLCB3,SENP2,FRAT1,PRKCB,CTNNB1,CTBP2,JUN,FRAT2,PLCB1,KREMEN1
REACTOME_DNA_DAMAGE_BYPASS	8/1792	48/13198	0.323978	0.524979	0.324848	8	POLD3,USP10,WDR48,UBE2B,TRIM25,UBC,UBE2L6,VCP
REACTOME_IRS_MEDIATED_SIGNALLING	8/1792	48/13198	0.323978	0.524979	0.324848	8	GAB2,PIK3CB,PIK3C3,GAB1,KL,KRAS,GRB2,TLR9
REACTOME_CREB1_PHOSPHORYLATION_THROUGH_NMDA_RECEPTOR_MEDIATED_ACTIVATION_OF_RAS_SIGNALING	5/1792	28/13198	0.329149	0.532593	0.329559	5	MAPK1,MAPK3,RPS6KA1,CREB1,KRAS
REACTOME_KERATAN_SULFATE_BIOSYNTHESIS	5/1792	28/13198	0.329149	0.532593	0.329559	5	ST3GAL4,B3GNT7,ST3GAL2,B4GALT5,B3GNT2
WP_ARRHYTHMOGENIC_RIGHT_VENTRICULAR_CARDIOMYOPATHY	12/1792	76/13198	0.33351	0.535806	0.331548	12	ITGA2B,CTNNA1,ACTN1,ITGB5,ACTN4,DSC2,LMNA,ITGA5,CTNNB1,CDH2,SLC8A1,ITGB3
BIOCARTA_TALL1_PATHWAY	3/1792	15/13198	0.333512	0.535806	0.331548	3	TNFSF13B,MAPK14,RELA
KEGG_GLYCOSAMINOGLYCAN_BIOSYNTHESIS_KERATAN_SULFATE	3/1792	15/13198	0.333512	0.535806	0.331548	3	B3GNT7,ST3GAL2,B3GNT2
PID_LPA4_PATHWAY	3/1792	15/13198	0.333512	0.535806	0.331548	3	PRKACA,CREB1,ADCY4
REACTOME_EICOSANOID_LIGAND_BINDING_RECEPTORS	3/1792	15/13198	0.333512	0.535806	0.331548	3	CYSLTR2,CYSLTR1,LTB4R
REACTOME_MRNA_DECAY_BY_5_TO_3_EXORIBONUCLEASE	3/1792	15/13198	0.333512	0.535806	0.331548	3	DDX6,PATL1,DCP2
REACTOME_REGULATION_OF_INNATE_IMMUNE_RESPONSES_TO_CYTOSOLIC_DNA	3/1792	15/13198	0.333512	0.535806	0.331548	3	TRIM21,UBC,TBK1
REACTOME_TFAP2_AP_2_FAMILY_REGULATES_TRANSCRIPTION_OF_GROWTH_FACTORS_AND_THEIR_RECEPTORS	3/1792	15/13198	0.333512	0.535806	0.331548	3	YY1,VEGFA,TGFA
WP_ERK_PATHWAY_IN_HUNTINGTONS_DISEASE	3/1792	15/13198	0.333512	0.535806	0.331548	3	MAPK1,CREB1,RAF1
WP_PHYTOCHEMICAL_ACTIVITY_ON_NRF2_TRANSCRIPTIONAL_ACTIVATION	3/1792	15/13198	0.333512	0.535806	0.331548	3	HMOX1,NFE2L2,CEBPB
REACTOME_DEACTIVATION_OF_THE_BETA_CATENIN_TRANSACTIVATING_COMPLEX	7/1792	42/13198	0.342057	0.549143	0.3398	7	TLE4,RBBP5,APC,TLE3,UBC,YWHAZ,CTNNB1
PID_ARF6_TRAFFICKING_PATHWAY	8/1792	49/13198	0.345457	0.554206	0.342933	8	SPAG9,CTNNA1,VAMP3,DNM2,CLTC,ASAP2,ITGA5,CTNNB1
REACTOME_ADORA2B_MEDIATED_ANTI_INFLAMMATORY_CYTOKINES_PRODUCTION	20/1792	133/13198	0.347262	0.556705	0.34448	20	PRKAR2B,GNAI3,PRKACA,GNB1,PRKAR1A,HRH2,PRKAR2A,GNAI2,GNB4,CREB1,GNG11,GNAZ,ADCY4,ADM,CYSLTR2,GPR27,GNB2,GNG5,GNG2,INSL3
REACTOME_SIGNALING_BY_FGFR_IN_DISEASE	10/1792	63/13198	0.349219	0.557094	0.344721	10	POLR2J,GAB2,POLR2C,GAB1,LRRFIP1,KRAS,STAT3,STAT5B,GRB2,CUX1
BIOCARTA_MTOR_PATHWAY	4/1792	22/13198	0.349234	0.557094	0.344721	4	EIF4G3,EIF4G2,PPP2CA,EIF4A2
KEGG_BIOSYNTHESIS_OF_UNSATURATED_FATTY_ACIDS	4/1792	22/13198	0.349234	0.557094	0.344721	4	ELOVL5,HSD17B12,ACOX1,YOD1
REACTOME_HS_GAG_DEGRADATION	4/1792	22/13198	0.349234	0.557094	0.344721	4	IDS,SDC3,GLB1,HPSE
WP_GLUTATHIONE_METABOLISM	4/1792	22/13198	0.349234	0.557094	0.344721	4	IDH1,G6PD,OPLAH,GPX3
WP_NAD_BIOSYNTHETIC_PATHWAYS	4/1792	22/13198	0.349234	0.557094	0.344721	4	SIRT2,NAMPT,BST1,NMNAT1
WP_PKCGAMMA_CALCIUM_SIGNALING_PATHWAY_IN_ATAXIA	4/1792	22/13198	0.349234	0.557094	0.344721	4	HOMER3,PLCB3,GNAQ,PLCB1
REACTOME_RUNX1_REGULATES_GENES_INVOLVED_IN_MEGAKARYOCYTE_DIFFERENTIATION_AND_PLATELET_FUNCTION	15/1792	98/13198	0.350461	0.558655	0.345687	15	KMT2E,ITGA2B,KMT2C,AGO1,TNRC6B,EP300,MYL9,KAT2B,RBBP5,NFE2,AGO3,AGO4,THBS1,PF4,GP1BA
WP_SELENIUM_MICRONUTRIENT_NETWORK	14/1792	91/13198	0.350733	0.558695	0.345711	14	ALOX5,PTGS2,PTGS1,SOD2,SELENOK,KYNU,CAT,IL1B,ALOX5AP,TXN,ABCA1,RELA,MSRB1,GPX3
REACTOME_ACYL_CHAIN_REMODELLING_OF_PE	5/1792	29/13198	0.357646	0.568902	0.352027	5	ABHD4,LPCAT3,PLBD1,MBOAT2,MBOAT1
REACTOME_TNFS_BIND_THEIR_PHYSIOLOGICAL_RECEPTORS	5/1792	29/13198	0.357646	0.568902	0.352027	5	TNFRSF1B,TNFRSF1A,TNFSF13B,TNFSF4,TNFSF14
REACTOME_PRE_NOTCH_EXPRESSION_AND_PROCESSING	18/1792	120/13198	0.362642	0.576442	0.356693	18	CREBBP,SEL1L,AGO1,TNRC6B,EP300,ST3GAL4,E2F3,KAT2B,AGO2,AGO3,NOTCH2,AGO4,FURIN,MAML1,RBPJ,JUN,MAML3,TFDP1
REACTOME_FATTY_ACID_METABOLISM	26/1792	177/13198	0.364171	0.578465	0.357944	26	ELOVL5,ALOX5,TBXAS1,ACSL4,PTGS2,PTGS1,ALOX12,PTGES3,ACOT9,ACSL3,PPT1,ALOX5AP,HSD17B4,PCTP,PTGES,HSD17B12,ACSL1,OLAH,ACOX1,MAPKAPK2,MID1IP1,DPEP2,RXRA,CYP4F3,HACD4,AMACR
KEGG_GLUTATHIONE_METABOLISM	8/1792	50/13198	0.367116	0.582666	0.360544	8	RRM2B,SMS,TXNDC12,IDH1,PGD,G6PD,OPLAH,GPX3
REACTOME_INTEGRIN_CELL_SURFACE_INTERACTIONS	13/1792	85/13198	0.367333	0.582666	0.360544	13	ITGA2B,CD44,ICAM3,ITGB5,VWF,SPP1,THBS1,F11R,ITGB2,ITGA5,ITGAM,ITGB3,PECAM1
KEGG_PEROXISOME	12/1792	78/13198	0.367904	0.583161	0.36085	12	FAR2,ACSL4,SOD2,CAT,ACSL3,HSD17B4,IDH1,ACSL1,ACOX1,PEX13,FAR1,AMACR
REACTOME_PKMTS_METHYLATE_HISTONE_LYSINES	11/1792	71/13198	0.368259	0.583313	0.360944	11	KMT2E,KMT2C,ASH1L,RBBP5,SETD7,NSD3,NSD1,ATF7IP,RELA,SETD2,KMT5A
BIOCARTA_P53_PATHWAY	3/1792	16/13198	0.372963	0.586234	0.362751	3	APAF1,CDKN1A,MDM2
KEGG_PRIMARY_BILE_ACID_BIOSYNTHESIS	3/1792	16/13198	0.372963	0.586234	0.362751	3	HSD17B4,CYP27A1,AMACR
PID_DNA_PK_PATHWAY	3/1792	16/13198	0.372963	0.586234	0.362751	3	XRCC5,LIG4,PRKDC
REACTOME_ELEVATION_OF_CYTOSOLIC_CA2_LEVELS	3/1792	16/13198	0.372963	0.586234	0.362751	3	P2RX1,ORAI2,STIM1
REACTOME_MAP3K8_TPL2_DEPENDENT_MAPK1_3_ACTIVATION	3/1792	16/13198	0.372963	0.586234	0.362751	3	MAP2K4,UBC,MAP2K1
REACTOME_P75NTR_SIGNALS_VIA_NF_KB	3/1792	16/13198	0.372963	0.586234	0.362751	3	RIPK2,UBC,RELA
REACTOME_PROCESSING_OF_SMDT1	3/1792	16/13198	0.372963	0.586234	0.362751	3	MICU1,YME1L1,MCU
REACTOME_SYNTHESIS_OF_PIPS_AT_THE_EARLY_ENDOSOME_MEMBRANE	3/1792	16/13198	0.372963	0.586234	0.362751	3	PIK3C3,PIKFYVE,MTMR10
WP_GPR40_PATHWAY	3/1792	16/13198	0.372963	0.586234	0.362751	3	PLCB3,PLCB1,PLCG2
WP_OSTEOCLAST_SIGNALING	3/1792	16/13198	0.372963	0.586234	0.362751	3	SPP1,IFNAR1,ITGB3
WP_TRYPTOPHAN_CATABOLISM_LEADING_TO_NAD_PRODUCTION	3/1792	16/13198	0.372963	0.586234	0.362751	3	NAMPT,KYNU,NMNAT1
BIOCARTA_CELLCYCLE_PATHWAY	4/1792	23/13198	0.381975	0.598728	0.370483	4	CDKN1B,CDKN1A,CDKN2D,TFDP1
REACTOME_NEPHRIN_FAMILY_INTERACTIONS	4/1792	23/13198	0.381975	0.598728	0.370483	4	PIK3CB,ACTN1,ACTN4,IQGAP1
REACTOME_TERMINATION_OF_O_GLYCAN_BIOSYNTHESIS	4/1792	23/13198	0.381975	0.598728	0.370483	4	ST6GALNAC2,ST3GAL4,ST3GAL2,ST6GALNAC3
WP_HIPPOYAP_SIGNALING_PATHWAY	4/1792	23/13198	0.381975	0.598728	0.370483	4	MAP4K4,NDRG1,LATS2,STK38L
REACTOME_ACTIVATION_OF_BH3_ONLY_PROTEINS	5/1792	30/13198	0.386218	0.603281	0.3733	5	BID,YWHAH,YWHAZ,YWHAB,TFDP1
WP_DOPAMINERGIC_NEUROGENESIS	5/1792	30/13198	0.386218	0.603281	0.3733	5	TGFB1,CDKN1C,NR4A2,ALDH1A1,STAT3
WP_EICOSANOID_METABOLISM_VIA_CYCLO_OXYGENASES_COX	5/1792	30/13198	0.386218	0.603281	0.3733	5	TBXAS1,PTGS2,PTGS1,PTGES,ACOX1
WP_MATRIX_METALLOPROTEINASES	5/1792	30/13198	0.386218	0.603281	0.3733	5	TIMP2,TCF20,MMP9,TIMP1,MMP8
WP_TLR4_SIGNALING_AND_TOLERANCE	5/1792	30/13198	0.386218	0.603281	0.3733	5	TAB2,IRAK3,TLR4,INPP5D,TBK1
REACTOME_INTERACTIONS_OF_REV_WITH_HOST_CELLULAR_PROTEINS	6/1792	37/13198	0.38819	0.604976	0.374349	6	NUP50,KPNB1,NUP98,NUP214,NUP58,RCC1
REACTOME_METALLOPROTEASE_DUBS	6/1792	37/13198	0.38819	0.604976	0.374349	6	UIMC1,EP300,KAT2B,STAM,UBC,NLRP3
WP_SYNAPTIC_SIGNALING_PATHWAYS_ASSOCIATED_WITH_AUTISM_SPECTRUM_DISORDER	8/1792	51/13198	0.388883	0.604976	0.374349	8	PIK3CB,GSK3B,MAPK1,MAPK3,PRKAA1,KRAS,PIK3CD,NF1
KEGG_ABC_TRANSPORTERS	7/1792	44/13198	0.388913	0.604976	0.374349	7	ABCC6,ABCC3,ABCG1,ABCA1,TAP1,ABCA13,TAP2
KEGG_AMINO_SUGAR_AND_NUCLEOTIDE_SUGAR_METABOLISM	7/1792	44/13198	0.388913	0.604976	0.374349	7	HEXB,PGM1,NANS,NAGK,NPL,HK1,HK3
REACTOME_ASSEMBLY_AND_CELL_SURFACE_PRESENTATION_OF_NMDA_RECEPTORS	7/1792	44/13198	0.388913	0.604976	0.374349	7	TUBB1,LIN7A,TUBA1B,TUBA4A,TUBA1A,TUBA8,TUBB4B
REACTOME_MITOCHONDRIAL_BIOGENESIS	14/1792	94/13198	0.398612	0.617564	0.382138	14	CREBBP,SMARCD3,NCOA1,TBL1X,MAPK14,SOD2,MEF2D,CREB1,NCOA2,NCOR1,MTX1,TBL1XR1,RXRA,NCOA6
REACTOME_G_ALPHA_Q_SIGNALLING_EVENTS	31/1792	216/13198	0.398653	0.617564	0.382138	31	BTK,DGKG,GNB1,MAPK1,MAPK3,HBEGF,GNB4,RGS2,RPS6KA1,CREB1,GNG11,KRAS,ANXA1,PLCB3,RGS18,CYSLTR2,GNAQ,PROK2,PRKCD,DAGLB,PTAFR,FPR2,GNB2,CYSLTR1,GNG5,GRB2,PLCB1,GPR132,GNG2,GRK5,LTB4R
BIOCARTA_EIF2_PATHWAY	2/1792	10/13198	0.402485	0.617564	0.382138	2	EIF2AK2,GSK3B
BIOCARTA_NPP1_PATHWAY	2/1792	10/13198	0.402485	0.617564	0.382138	2	SPP1,ALPL
BIOCARTA_RANMS_PATHWAY	2/1792	10/13198	0.402485	0.617564	0.382138	2	KPNB1,RCC1
KEGG_LIMONENE_AND_PINENE_DEGRADATION	2/1792	10/13198	0.402485	0.617564	0.382138	2	ALDH2,YOD1
REACTOME_CAMK_IV_MEDIATED_PHOSPHORYLATION_OF_CREB	2/1792	10/13198	0.402485	0.617564	0.382138	2	CAMKK2,CREB1
REACTOME_CASPASE_ACTIVATION_VIA_DEPENDENCE_RECEPTORS_IN_THE_ABSENCE_OF_LIGAND	2/1792	10/13198	0.402485	0.617564	0.382138	2	DAPK2,DAPK1
REACTOME_DISEASES_ASSOCIATED_WITH_SURFACTANT_METABOLISM	2/1792	10/13198	0.402485	0.617564	0.382138	2	CSF2RB,CSF2RA
REACTOME_IRAK2_MEDIATED_ACTIVATION_OF_TAK1_COMPLEX	2/1792	10/13198	0.402485	0.617564	0.382138	2	TAB2,UBC
REACTOME_MRNA_EDITING	2/1792	10/13198	0.402485	0.617564	0.382138	2	APOBEC3A,ADAR
REACTOME_ORGANIC_CATION_TRANSPORT	2/1792	10/13198	0.402485	0.617564	0.382138	2	SLC22A15,SLC22A4
REACTOME_P75NTR_REGULATES_AXONOGENESIS	2/1792	10/13198	0.402485	0.617564	0.382138	2	RHOA,RTN4
REACTOME_POU5F1_OCT4_SOX2_NANOG_REPRESS_GENES_RELATED_TO_DIFFERENTIATION	2/1792	10/13198	0.402485	0.617564	0.382138	2	TSC22D1,HHEX
REACTOME_REMOVAL_OF_AMINOTERMINAL_PROPEPTIDES_FROM_GAMMA_CARBOXYLATED_PROTEINS	2/1792	10/13198	0.402485	0.617564	0.382138	2	FURIN,PROS1
REACTOME_RUNX1_AND_FOXP3_CONTROL_THE_DEVELOPMENT_OF_REGULATORY_T_LYMPHOCYTES_TREGS_	2/1792	10/13198	0.402485	0.617564	0.382138	2	CTLA4,CR1
REACTOME_SYNTHESIS_OF_PYROPHOSPHATES_IN_THE_CYTOSOL	2/1792	10/13198	0.402485	0.617564	0.382138	2	ITPK1,IP6K1
REACTOME_TETRAHYDROBIOPTERIN_BH4_SYNTHESIS_RECYCLING_SALVAGE_AND_REGULATION	2/1792	10/13198	0.402485	0.617564	0.382138	2	HSP90AA1,SPR
ST_INTERFERON_GAMMA_PATHWAY	2/1792	10/13198	0.402485	0.617564	0.382138	2	IFNGR1,JAK1
WP_LEPTIN_AND_ADIPONECTIN	2/1792	10/13198	0.402485	0.617564	0.382138	2	ADIPOR2,PRKAA1
REACTOME_METABOLISM_OF_WATER_SOLUBLE_VITAMINS_AND_COFACTORS	18/1792	123/13198	0.404626	0.620426	0.383909	18	NADK,SLC2A3,PTGS2,NAMPT,BST1,VNN1,VNN2,PANK2,TCN1,MTHFS,PARP9,PARP8,PANK4,PDXK,LMBRD1,NMNAT1,SLC19A1,TCN2
REACTOME_METABOLISM_OF_POLYAMINES	9/1792	59/13198	0.408801	0.626402	0.387607	9	PSME1,SMS,OAZ1,AMD1,SAT1,PSME3,OAZ2,PSMB8,PSMB3
WP_ENDODERM_DIFFERENTIATION	21/1792	145/13198	0.410708	0.626821	0.387866	21	PAF1,JARID2,PIAS1,FOXN3,BCORL1,TGFB1,NR3C1,CDC73,APC,RTF1,SMAD4,PARP8,HHEX,DUSP2,EMSY,ZNF281,CTNNB1,BPTF,CTBP2,EXT1,PBX1
BIOCARTA_ARF_PATHWAY	3/1792	17/13198	0.411931	0.626821	0.387866	3	PIK3CG,MDM2,RAC1
BIOCARTA_LAIR_PATHWAY	3/1792	17/13198	0.411931	0.626821	0.387866	3	SELPLG,ITGB2,SELP
PID_INTEGRIN5_PATHWAY	3/1792	17/13198	0.411931	0.626821	0.387866	3	PLAUR,ITGB5,TGFBR1
REACTOME_FORMATION_OF_SENESCENCE_ASSOCIATED_HETEROCHROMATIN_FOCI_SAHF_	3/1792	17/13198	0.411931	0.626821	0.387866	3	LMNB1,UBN1,CDKN1A
REACTOME_KSRP_KHSRP_BINDS_AND_DESTABILIZES_MRNA	3/1792	17/13198	0.411931	0.626821	0.387866	3	MAPK14,YWHAZ,DCP2
REACTOME_TNF_RECEPTOR_SUPERFAMILY_TNFSF_MEMBERS_MEDIATING_NON_CANONICAL_NF_KB_PATHWAY	3/1792	17/13198	0.411931	0.626821	0.387866	3	TNFSF13B,LTBR,TNFSF14
WP_CELLS_AND_MOLECULES_INVOLVED_IN_LOCAL_ACUTE_INFLAMMATORY_RESPONSE	3/1792	17/13198	0.411931	0.626821	0.387866	3	SELPLG,ITGB2,SELP
WP_LEPTIN_INSULIN_OVERLAP	3/1792	17/13198	0.411931	0.626821	0.387866	3	PIK3CG,STAT3,SOCS3
WP_MITOCHONDRIAL_LCFATTY_ACID_BETAOXIDATION	3/1792	17/13198	0.411931	0.626821	0.387866	3	ACSL4,ACSL3,ACSL1
WP_INTEGRATED_CANCER_PATHWAY	7/1792	45/13198	0.412411	0.626821	0.387866	7	CASP8,CDKN1B,CDKN1A,MDM2,BACH1,JAK1,MAP3K5
WP_NEPHROTIC_SYNDROME	7/1792	45/13198	0.412411	0.626821	0.387866	7	APOL1,MYH9,E2F3,ACTN4,LMNA,CTLA4,COQ2
REACTOME_GAP_JUNCTION_ASSEMBLY	6/1792	38/13198	0.413834	0.626934	0.387936	6	TUBB1,TUBA1B,TUBA4A,TUBA1A,TUBA8,TUBB4B
REACTOME_RAS_PROCESSING	4/1792	24/13198	0.414516	0.626934	0.387936	4	KRAS,GOLGA7,UBC,PDE6D
REACTOME_TRIGLYCERIDE_CATABOLISM	4/1792	24/13198	0.414516	0.626934	0.387936	4	ABHD5,PRKACA,PLIN3,PPP1CB
WP_EBV_LMP1_SIGNALING	4/1792	24/13198	0.414516	0.626934	0.387936	4	HSP90AA1,MAPK1,RELA,MAP3K3
WP_NANOPARTICLE_TRIGGERED_AUTOPHAGIC_CELL_DEATH	4/1792	24/13198	0.414516	0.626934	0.387936	4	VMP1,SH3GLB1,ATG3,ATG7
REACTOME_FCGR3A_MEDIATED_IL10_SYNTHESIS	14/1792	95/13198	0.414705	0.626934	0.387936	14	FGR,PRKAR2B,PRKACA,HCK,PRKAR1A,PRKAR2A,CREB1,ADCY4,FCGR2A,FCGR1A,SYK,PLCG2,FCGR3A,LYN
REACTOME_RUNX2_REGULATES_BONE_DEVELOPMENT	5/1792	31/13198	0.414711	0.626934	0.387936	5	MAPK1,MAPK3,SMAD4,HEY1,RBM14
WP_1Q211_COPY_NUMBER_VARIATION_SYNDROME	5/1792	31/13198	0.414711	0.626934	0.387936	5	TJP2,PRKAA1,NOTCH2,F11R,CTNNB1
WP_HAIR_FOLLICLE_DEVELOPMENT_CYTODIFFERENTIATION_PART_3_OF_3	13/1792	88/13198	0.417415	0.630599	0.390204	13	TGFB1,NR3C1,FOSB,NOTCH2,DSC2,SMAD4,ADAM17,CTNNB1,RBPJ,FOS,JUN,S100A4,CUX1
REACTOME_REGULATION_OF_TP53_ACTIVITY	23/1792	160/13198	0.418149	0.631285	0.390628	23	PHF20,KAT6A,RFFL,BRPF3,EP300,PRMT5,CHD4,MAPK14,PPP2CA,SGK1,TAF12,PRKAA1,MDM2,GATAD2B,UBC,ZNF385A,HIPK1,RICTOR,TP53INP1,ING2,BANP,PLK3,KMT5A
REACTOME_REGULATION_OF_INSULIN_LIKE_GROWTH_FACTOR_IGF_TRANSPORT_AND_UPTAKE_BY_INSULIN_LIKE_GROWTH_FACTOR_BINDING_PROTEINS_IGFBPS_	18/1792	124/13198	0.418727	0.631735	0.390907	18	VCAN,LTBP1,APLP2,APOL1,TIMP1,DNAJC3,QSOX1,SPP1,GOLM1,CKAP4,ADAM10,TGOLN2,MIA3,FSTL1,SHISA5,CDH2,SERPINA1,F5
REACTOME_DOWNSTREAM_SIGNALING_EVENTS_OF_B_CELL_RECEPTOR_BCR_	12/1792	81/13198	0.420213	0.633129	0.39177	12	FKBP1A,PSME1,PSME3,KRAS,PPP3CA,BCL10,UBC,REL,PRKCB,RELA,PSMB8,PSMB3
REACTOME_RNA_POLYMERASE_II_TRANSCRIBES_SNRNA_GENES	12/1792	81/13198	0.420213	0.633129	0.39177	12	POLR2J,CCNK,INTS6,POLR2C,ELL,ELL2,GTF2B,INTS3,PCF11,ZNF143,SP1,SUPT4H1
WP_CYTOSOLIC_DNASENSING_PATHWAY	11/1792	74/13198	0.423109	0.637066	0.394206	11	CASP8,CYLD,MAVS,DDX58,TRIM25,IL1B,CASP1,ADAR,AIM2,RELA,TBK1
PID_SYNDECAN_1_PATHWAY	7/1792	46/13198	0.435845	0.655804	0.405801	7	PRKACA,MAPK1,MMP9,MAPK3,TGFB1,SDCBP,HPSE
PID_AURORA_B_PATHWAY	6/1792	39/13198	0.439356	0.659637	0.408172	6	VIM,CUL3,MYLK,EVI5,RHOA,TACC1
REACTOME_GENERATION_OF_SECOND_MESSENGER_MOLECULES	6/1792	39/13198	0.439356	0.659637	0.408172	6	WAS,LCP2,VASP,PAK1,PAK2,PLCG2
REACTOME_TRANSLESION_SYNTHESIS_BY_Y_FAMILY_DNA_POLYMERASES_BYPASSES_LESIONS_ON_DNA_TEMPLATE	6/1792	39/13198	0.439356	0.659637	0.408172	6	POLD3,USP10,TRIM25,UBC,UBE2L6,VCP
REACTOME_MITOTIC_SPINDLE_CHECKPOINT	16/1792	111/13198	0.439563	0.659637	0.408172	16	PAFAH1B1,PPP2R5A,PPP2R5B,UBE2D1,NDE1,MAPRE1,NUP98,PPP2CA,B9D2,CLIP1,DYNC1LI2,DYNC1LI1,AHCTF1,TAOK1,NDEL1,CDC26
REACTOME_TERMINATION_OF_TRANSLESION_DNA_SYNTHESIS	5/1792	32/13198	0.442985	0.663844	0.410775	5	POLD3,USP10,TRIM25,UBC,UBE2L6
WP_OVARIAN_INFERTILITY_GENES	5/1792	32/13198	0.442985	0.663844	0.410775	5	SYNE2,CDKN1B,VDR,NCOR1,CEBPB
REACTOME_G1_S_DNA_DAMAGE_CHECKPOINTS	10/1792	68/13198	0.445372	0.663844	0.410775	10	PHF20,PSME1,CDKN1B,CDKN1A,PSME3,MDM2,UBC,ZNF385A,PSMB8,PSMB3
WP_MESODERMAL_COMMITMENT_PATHWAY	22/1792	155/13198	0.446364	0.663844	0.410775	22	JARID2,PIAS1,PRKACA,BCORL1,PRKAR1A,PPP2CA,ACVR1,NFE2L2,BHLHE40,ADAM19,KLF4,SMAD4,KDM6A,C9orf72,PARP8,EMSY,ZNF281,CTBP2,SETD2,EXT1,PBX1,LEFTY1
REACTOME_DEADENYLATION_OF_MRNA	4/1792	25/13198	0.446659	0.663844	0.410775	4	CNOT6,PAN3,CNOT8,EIF4A2
REACTOME_SIGNALING_BY_NTRK2_TRKB_	4/1792	25/13198	0.446659	0.663844	0.410775	4	GAB1,KRAS,RAC1,GRB2
REACTOME_EXTRACELLULAR_MATRIX_ORGANIZATION	42/1792	301/13198	0.449527	0.663844	0.410775	42	ITGA2B,CAPN1,CD44,TIMP2,VCAN,LTBP1,ACTN1,ICAM3,CEACAM1,PSEN1,ITGB5,PLOD1,ADAMTS2,MMP9,TIMP1,TGFB1,VWF,SPARC,CTSD,MMP8,SPP1,P4HA1,EMILIN2,ADAM19,THBS1,ADAM10,FBN2,MFAP1,FURIN,ADAM17,CAST,F11R,ITGB2,ITGA5,SDC3,NCSTN,CTSS,CTSB,ADAM9,ITGAM,ITGB3,PECAM1
REACTOME_DEFECTIVE_CFTR_CAUSES_CYSTIC_FIBROSIS	9/1792	61/13198	0.449598	0.663844	0.410775	9	SEL1L,PSME1,PSME3,OS9,RNF185,UBC,VCP,PSMB8,PSMB3
REACTOME_ACTIVATION_OF_SMO	3/1792	18/13198	0.450101	0.663844	0.410775	3	CSNK1A1,ARRB1,ARRB2
REACTOME_TP53_REGULATES_TRANSCRIPTION_OF_GENES_INVOLVED_IN_G2_CELL_CYCLE_ARREST	3/1792	18/13198	0.450101	0.663844	0.410775	3	EP300,ZNF385A,TFDP1
WP_MAMMARY_GLAND_DEVELOPMENT_PATHWAY_EMBRYONIC_DEVELOPMENT_STAGE_1_OF_4	3/1792	18/13198	0.450101	0.663844	0.410775	3	TGFB1,ALPL,ZEB2
WP_SULFATION_BIOTRANSFORMATION_REACTION	3/1792	18/13198	0.450101	0.663844	0.410775	3	G6PD,SULT1B1,PAPSS2
WP_TCA_CYCLE_AKA_KREBS_OR_CITRIC_ACID_CYCLE	3/1792	18/13198	0.450101	0.663844	0.410775	3	OGDH,SDHB,SDHC
WP_OSTEOBLAST_DIFFERENTIATION	17/1792	119/13198	0.450689	0.663844	0.410775	17	PIK3CB,PIK3C3,MAPK1,JAG1,MAPK3,PIK3CG,MAPK14,NOTCH2,PIK3R5,SMAD4,PRKCD,HEY1,PRKCB,CTNNB1,RBPJ,PIK3CD,PRKDC
REACTOME_PEPTIDE_HORMONE_METABOLISM	13/1792	90/13198	0.450919	0.663844	0.410775	13	RAB27A,ERO1B,CTSZ,EXOC8,CTSD,KLF4,SEC11A,CTNNB1,KIF5B,ATP6AP2,MME,MYO5A,ERO1A
REACTOME_UB_SPECIFIC_PROCESSING_PROTEASES	31/1792	221/13198	0.451978	0.663844	0.410775	31	POLB,CYLD,USP48,PSME1,HIF1A,USP10,TGFBR1,DDX58,SUDS3,USP4,WDR48,STAM2,USP34,USP22,USP9X,RHOT1,PSME3,USP15,MDM2,ARRB1,USP8,WDR20,USP3,ARRB2,SMAD4,UBC,USP25,ATXN7,FOXO4,PSMB8,PSMB3
NABA_ECM_AFFILIATED	24/1792	170/13198	0.452008	0.663844	0.410775	24	PLXNA2,FCN1,LGALS2,CLEC2B,LGALSL,PLXDC2,ANXA11,LGALS12,ANXA1,PLXNC1,ANXA3,CLEC1A,SDC3,ANXA5,CLEC1B,CLEC4E,CLEC4D,SEMA6B,LGALS9,CLEC7A,SEMA4B,SEMA4D,SEMA4A,CLEC5A
BIOCARTA_BTG2_PATHWAY	2/1792	11/13198	0.452085	0.663844	0.410775	2	BTG1,BTG2
BIOCARTA_RANBP2_PATHWAY	2/1792	11/13198	0.452085	0.663844	0.410775	2	PIAS1,MDM2
BIOCARTA_SRCRPTP_PATHWAY	2/1792	11/13198	0.452085	0.663844	0.410775	2	PRKCB,GRB2
PID_RANBP2_PATHWAY	2/1792	11/13198	0.452085	0.663844	0.410775	2	PIAS1,MDM2
REACTOME_ACTIVATED_NTRK2_SIGNALS_THROUGH_FRS2_AND_FRS3	2/1792	11/13198	0.452085	0.663844	0.410775	2	KRAS,GRB2
REACTOME_APOPTOTIC_CLEAVAGE_OF_CELL_ADHESION_PROTEINS	2/1792	11/13198	0.452085	0.663844	0.410775	2	TJP2,CTNNB1
REACTOME_BETA_OXIDATION_OF_VERY_LONG_CHAIN_FATTY_ACIDS	2/1792	11/13198	0.452085	0.663844	0.410775	2	HSD17B4,ACOX1
REACTOME_DERMATAN_SULFATE_BIOSYNTHESIS	2/1792	11/13198	0.452085	0.663844	0.410775	2	VCAN,DSE
REACTOME_GAMMA_CARBOXYLATION_TRANSPORT_AND_AMINO_TERMINAL_CLEAVAGE_OF_PROTEINS	2/1792	11/13198	0.452085	0.663844	0.410775	2	FURIN,PROS1
REACTOME_INTERLEUKIN_27_SIGNALING	2/1792	11/13198	0.452085	0.663844	0.410775	2	JAK1,STAT3
REACTOME_MET_ACTIVATES_RAS_SIGNALING	2/1792	11/13198	0.452085	0.663844	0.410775	2	KRAS,GRB2
REACTOME_REGULATION_OF_SIGNALING_BY_NODAL	2/1792	11/13198	0.452085	0.663844	0.410775	2	ACVR1B,LEFTY1
REACTOME_SODIUM_CALCIUM_EXCHANGERS	2/1792	11/13198	0.452085	0.663844	0.410775	2	SLC24A4,SLC8A1
REACTOME_SUMOYLATION_OF_IMMUNE_RESPONSE_PROTEINS	2/1792	11/13198	0.452085	0.663844	0.410775	2	RELA,TOPORS
REACTOME_SYNTHESIS_OF_PIPS_AT_THE_LATE_ENDOSOME_MEMBRANE	2/1792	11/13198	0.452085	0.663844	0.410775	2	PIK3C3,PIKFYVE
REACTOME_TICAM1_TRAF6_DEPENDENT_INDUCTION_OF_TAK1_COMPLEX	2/1792	11/13198	0.452085	0.663844	0.410775	2	TAB2,UBC
KEGG_ARGININE_AND_PROLINE_METABOLISM	8/1792	54/13198	0.454158	0.666019	0.412121	8	OAT,SMS,ALDH2,ARG1,P4HA1,AMD1,SAT1,GLUL
REACTOME_SIGNALING_BY_TYPE_1_INSULIN_LIKE_GROWTH_FACTOR_1_RECEPTOR_IGF1R_	8/1792	54/13198	0.454158	0.666019	0.412121	8	GAB2,PIK3CB,PIK3C3,GAB1,KL,KRAS,GRB2,TLR9
REACTOME_SUMOYLATION_OF_RNA_BINDING_PROTEINS	7/1792	47/13198	0.459137	0.672883	0.416368	7	HNRNPC,NUP50,NUP98,NUP214,PHC2,NUP58,HNRNPK
KEGG_CALCIUM_SIGNALING_PATHWAY	25/1792	178/13198	0.460581	0.674561	0.417407	25	PHKA2,ATP2B4,MYLK,ATP2B1,PRKACA,PHKB,P2RX1,BST1,HRH2,PTK2B,ADCY4,PPP3CA,CALM2,PLCB3,CYSLTR2,GNAQ,CALM3,PRKCB,PTAFR,PPID,CYSLTR1,PLCB1,SLC8A1,CHP1,PLCG2
PID_FOXM1_PATHWAY	6/1792	40/13198	0.464657	0.68009	0.420828	6	CREBBP,EP300,TGFA,MAP2K1,FOS,SP1
REACTOME_ACTIVATION_OF_MATRIX_METALLOPROTEINASES	5/1792	33/13198	0.470913	0.687459	0.425388	5	TIMP2,MMP9,TIMP1,MMP8,FURIN
REACTOME_EXPORT_OF_VIRAL_RIBONUCLEOPROTEINS_FROM_NUCLEUS	5/1792	33/13198	0.470913	0.687459	0.425388	5	NUP50,NUP98,NUP214,NUP58,HSPA1A
REACTOME_HIV_ELONGATION_ARREST_AND_RECOVERY	5/1792	33/13198	0.470913	0.687459	0.425388	5	POLR2J,CCNK,POLR2C,ELL,SUPT4H1
WP_STATIN_PATHWAY	5/1792	33/13198	0.470913	0.687459	0.425388	5	SOAT1,HMGCR,LRP1,ABCA1,DGAT1
KEGG_ECM_RECEPTOR_INTERACTION	12/1792	84/13198	0.472547	0.688952	0.426312	12	ITGA2B,CD44,ITGB5,GP6,VWF,SPP1,THBS1,ITGA5,SDC3,GP9,GP1BA,ITGB3
REACTOME_TRANSPORT_OF_MATURE_TRANSCRIPT_TO_CYTOPLASM	12/1792	84/13198	0.472547	0.688952	0.426312	12	ZC3H11A,NUP50,POLDIP3,THOC5,CASC3,NUP98,SRSF9,SRSF4,NUP214,NUP58,SLU7,RBM8A
KEGG_CYTOSOLIC_DNA_SENSING_PATHWAY	8/1792	55/13198	0.475694	0.691751	0.428044	8	MAVS,DDX58,IL1B,CASP1,ADAR,AIM2,RELA,TBK1
REACTOME_AUF1_HNRNP_D0_BINDS_AND_DESTABILIZES_MRNA	8/1792	55/13198	0.475694	0.691751	0.428044	8	PSME1,HSPB1,HSPA8,PSME3,UBC,PSMB8,HSPA1A,PSMB3
REACTOME_HEPARAN_SULFATE_HEPARIN_HS_GAG_METABOLISM	8/1792	55/13198	0.475694	0.691751	0.428044	8	IDS,VCAN,NDST1,XYLT1,SDC3,GLB1,HPSE,EXT1
REACTOME_REGULATION_OF_RUNX3_EXPRESSION_AND_ACTIVITY	8/1792	55/13198	0.475694	0.691751	0.428044	8	PSME1,EP300,TGFB1,PSME3,MDM2,UBC,PSMB8,PSMB3
REACTOME_ABC_TRANSPORTER_DISORDERS	11/1792	77/13198	0.477858	0.692753	0.428664	11	SEL1L,ABCC6,PSME1,PSME3,OS9,RNF185,UBC,ABCA1,VCP,PSMB8,PSMB3
REACTOME_SUMOYLATION_OF_DNA_DAMAGE_RESPONSE_AND_REPAIR_PROTEINS	11/1792	77/13198	0.477858	0.692753	0.428664	11	PIAS1,SP100,NUP50,STAG2,NUP98,STAG1,NUP214,PHC2,NUP58,XPC,RAD21
BIOCARTA_CARM_ER_PATHWAY	4/1792	26/13198	0.478227	0.692753	0.428664	4	CREBBP,SPEN,EP300,SRA1
KEGG_GLYCOSAMINOGLYCAN_BIOSYNTHESIS_HEPARAN_SULFATE	4/1792	26/13198	0.478227	0.692753	0.428664	4	EXTL3,NDST1,XYLT1,EXT1
KEGG_GLYCOSPHINGOLIPID_BIOSYNTHESIS_LACTO_AND_NEOLACTO_SERIES	4/1792	26/13198	0.478227	0.692753	0.428664	4	ST3GAL4,B3GNT2,B3GNT5,FUT7
PID_INSULIN_GLUCOSE_PATHWAY	4/1792	26/13198	0.478227	0.692753	0.428664	4	GSK3B,YWHAH,YWHAZ,YWHAB
REACTOME_PCP_CE_PATHWAY	13/1792	92/13198	0.48424	0.701014	0.433775	13	RHOA,PSME1,PARD6A,RAC2,PSME3,RAC1,CLTC,ARRB2,UBC,AP2M1,PRKCB,PSMB8,PSMB3
BIOCARTA_IGF1MTOR_PATHWAY	3/1792	19/13198	0.487213	0.702609	0.434762	3	GSK3B,PPP2CA,INPPL1
BIOCARTA_LIS1_PATHWAY	3/1792	19/13198	0.487213	0.702609	0.434762	3	PAFAH1B1,CLIP1,NDEL1
REACTOME_PROCESSING_OF_INTRONLESS_PRE_MRNAS	3/1792	19/13198	0.487213	0.702609	0.434762	3	PAPOLA,CPSF7,PCF11
REACTOME_TICAM1_RIP1_MEDIATED_IKK_COMPLEX_RECRUITMENT	3/1792	19/13198	0.487213	0.702609	0.434762	3	UBE2D1,UBE2D3,UBC
WP_GENES_TARGETED_BY_MIRNAS_IN_ADIPOCYTES	3/1792	19/13198	0.487213	0.702609	0.434762	3	KCNJ2,KCNE1,TMSB4X
WP_SREBF_AND_MIR33_IN_CHOLESTEROL_AND_LIPID_HOMEOSTASIS	3/1792	19/13198	0.487213	0.702609	0.434762	3	HMGCR,PRKAA1,ABCA1
KEGG_GRAFT_VERSUS_HOST_DISEASE	6/1792	41/13198	0.489649	0.705219	0.436378	6	CD86,IL1B,HLA-C,HLA-E,HLA-A,HLA-B
REACTOME_DISEASES_ASSOCIATED_WITH_GLYCOSAMINOGLYCAN_METABOLISM	6/1792	41/13198	0.489649	0.705219	0.436378	6	VCAN,HEXB,CHSY1,SDC3,EXT1,PAPSS2
REACTOME_SIGNALING_BY_THE_B_CELL_RECEPTOR_BCR_	23/1792	166/13198	0.49273	0.709065	0.438757	23	BTK,FKBP1A,PSME1,PSME3,KRAS,PPP3CA,VAV1,BCL10,SH3KBP1,UBC,PIK3AP1,ORAI2,REL,SYK,PRKCB,STIM1,PIK3CD,RELA,GRB2,PLCG2,PSMB8,LYN,PSMB3
REACTOME_BIOSYNTHESIS_OF_THE_N_GLYCAN_PRECURSOR_DOLICHOL_LIPID_LINKED_OLIGOSACCHARIDE_LLO_AND_TRANSFER_TO_A_NASCENT_PROTEIN	11/1792	78/13198	0.49591	0.709065	0.438757	11	CTSA,ST6GALNAC2,NANS,ST3GAL4,ST8SIA4,NAGK,NPL,ST3GAL2,GLB1,ST6GALNAC3,NEU1
BIOCARTA_NUCLEARRS_PATHWAY	5/1792	34/13198	0.498379	0.709065	0.438757	5	ABCC3,VDR,RARA,ABCG1,ABCA1
PID_ATM_PATHWAY	5/1792	34/13198	0.498379	0.709065	0.438757	5	BID,TP53BP1,UIMC1,MDM2,YWHAB
REACTOME_TRANSCRIPTIONAL_REGULATION_BY_E2F6	5/1792	34/13198	0.498379	0.709065	0.438757	5	YAF2,APAF1,MAX,RYBP,TFDP1
WP_FATTY_ACID_BETA_OXIDATION	5/1792	34/13198	0.498379	0.709065	0.438757	5	ACSL4,TPI1,ACSL3,ACSL1,GK
WP_PURINERGIC_SIGNALING	5/1792	34/13198	0.498379	0.709065	0.438757	5	GNAI3,P2RX1,GNAI2,GNAZ,P2RY13
BIOCARTA_FIBRINOLYSIS_PATHWAY	2/1792	12/13198	0.49924	0.709065	0.438757	2	F13A1,SERPINB2
BIOCARTA_HSWI_SNF_PATHWAY	2/1792	12/13198	0.49924	0.709065	0.438757	2	NR3C1,NF1
BIOCARTA_TCYTOTOXIC_PATHWAY	2/1792	12/13198	0.49924	0.709065	0.438757	2	PTPRC,ITGB2
BIOCARTA_THELPER_PATHWAY	2/1792	12/13198	0.49924	0.709065	0.438757	2	PTPRC,ITGB2
REACTOME_ACTIVATION_OF_THE_TFAP2_AP_2_FAMILY_OF_TRANSCRIPTION_FACTORS	2/1792	12/13198	0.49924	0.709065	0.438757	2	CREBBP,EP300
REACTOME_BUTYROPHILIN_BTN_FAMILY_INTERACTIONS	2/1792	12/13198	0.49924	0.709065	0.438757	2	BTN2A1,BTNL8
REACTOME_CASPASE_MEDIATED_CLEAVAGE_OF_CYTOSKELETAL_PROTEINS	2/1792	12/13198	0.49924	0.709065	0.438757	2	VIM,CASP8
REACTOME_EICOSANOIDS	2/1792	12/13198	0.49924	0.709065	0.438757	2	TBXAS1,CYP4F3
REACTOME_ETHANOL_OXIDATION	2/1792	12/13198	0.49924	0.709065	0.438757	2	ALDH2,ALDH1A1
REACTOME_PHYSIOLOGICAL_FACTORS	2/1792	12/13198	0.49924	0.709065	0.438757	2	KAT2B,HIPK1
REACTOME_PREGNENOLONE_BIOSYNTHESIS	2/1792	12/13198	0.49924	0.709065	0.438757	2	STARD3NL,TSPO
REACTOME_TP53_REGULATES_TRANSCRIPTION_OF_DEATH_RECEPTORS_AND_LIGANDS	2/1792	12/13198	0.49924	0.709065	0.438757	2	TNFRSF10B,TNFRSF10C
REACTOME_TRANSPORT_OF_ORGANIC_ANIONS	2/1792	12/13198	0.49924	0.709065	0.438757	2	SLCO4C1,SLCO3A1
WP_LNCRNAMEDIATED_MECHANISMS_OF_THERAPEUTIC_RESISTANCE	2/1792	12/13198	0.49924	0.709065	0.438757	2	HIF1A,CDKN1A
WP_TFS_REGULATE_MIRNAS_RELATED_TO_CARDIAC_HYPERTROPHY	2/1792	12/13198	0.49924	0.709065	0.438757	2	TGFB1,STAT3
REACTOME_METABOLISM_OF_VITAMINS_AND_COFACTORS	26/1792	189/13198	0.50371	0.714964	0.442407	26	NADK,SLC2A3,PTGS2,HSP90AA1,NAMPT,BST1,VNN1,VNN2,SPR,LRP1,PANK2,TCN1,MTHFS,IDH1,PARP9,PARP8,PANK4,PDXK,SDC3,PLB1,LMBRD1,COQ2,NMNAT1,SLC19A1,TCN2,LRP10
PID_MYC_ACTIV_PATHWAY	11/1792	79/13198	0.513806	0.728835	0.450991	11	CREBBP,HSP90AA1,EP300,MMP9,GAPDH,E2F3,TAF12,MAX,LDHA,SMAD4,RCC1
REACTOME_REGULATION_OF_BETA_CELL_DEVELOPMENT	6/1792	42/13198	0.514247	0.729002	0.451094	6	CREBBP,EP300,KAT2B,MAML1,RBPJ,MAML3
WP_METABOLISM_OF_SPINGOLIPIDS_IN_ER_AND_GOLGI_APPARATUS	3/1792	20/13198	0.523061	0.740565	0.458249	3	GALNT1,SGMS2,ST6GALNAC3
WP_MITOCHONDRIAL_GENE_EXPRESSION	3/1792	20/13198	0.523061	0.740565	0.458249	3	CREB1,PPP3CA,SP1
KEGG_PRIMARY_IMMUNODEFICIENCY	5/1792	35/13198	0.525281	0.74231	0.459329	5	BTK,PTPRC,JAK3,TAP1,TAP2
REACTOME_SUMOYLATION_OF_SUMOYLATION_PROTEINS	5/1792	35/13198	0.525281	0.74231	0.459329	5	NUP50,NUP98,NUP214,NUP58,TOPORS
WP_NUCLEAR_RECEPTORS_IN_LIPID_METABOLISM_AND_TOXICITY	5/1792	35/13198	0.525281	0.74231	0.459329	5	ABCC3,VDR,RARA,ABCG1,ABCA1
REACTOME_CYTOCHROME_P450_ARRANGED_BY_SUBSTRATE_TYPE	9/1792	65/13198	0.529533	0.747381	0.462467	9	TBXAS1,NCOA1,AHR,POR,CYP27A1,NCOA2,ARNT,RXRA,CYP4F3
REACTOME_HEDGEHOG_LIGAND_BIOGENESIS	9/1792	65/13198	0.529533	0.747381	0.462467	9	SEL1L,PSME1,PSME3,OS9,UBC,ADAM17,VCP,PSMB8,PSMB3
KEGG_TYPE_I_DIABETES_MELLITUS	6/1792	43/13198	0.538379	0.757882	0.468964	6	CD86,IL1B,HLA-C,HLA-E,HLA-A,HLA-B
KEGG_ARACHIDONIC_ACID_METABOLISM	8/1792	58/13198	0.53884	0.757882	0.468964	8	ALOX5,TBXAS1,PTGS2,PTGS1,ALOX12,PTGES,CYP4F3,GPX3
REACTOME_FORMATION_OF_RNA_POL_II_ELONGATION_COMPLEX_	8/1792	58/13198	0.53884	0.757882	0.468964	8	POLR2J,PAF1,CCNK,POLR2C,ELL,CDC73,RTF1,SUPT4H1
REACTOME_PROCESSING_OF_CAPPED_INTRONLESS_PRE_MRNA	4/1792	28/13198	0.539055	0.757882	0.468964	4	PAPOLA,CPSF7,PCF11,LSM10
BIOCARTA_EXTRINSIC_PATHWAY	2/1792	13/13198	0.543698	0.757882	0.468964	2	PROS1,F5
KEGG_SULFUR_METABOLISM	2/1792	13/13198	0.543698	0.757882	0.468964	2	CHST11,PAPSS2
REACTOME_INHIBITION_OF_REPLICATION_INITIATION_OF_DAMAGED_DNA_BY_RB1_E2F1	2/1792	13/13198	0.543698	0.757882	0.468964	2	PPP2CA,TFDP1
REACTOME_NF_KB_IS_ACTIVATED_AND_SIGNALS_SURVIVAL	2/1792	13/13198	0.543698	0.757882	0.468964	2	UBC,RELA
REACTOME_P75NTR_RECRUITS_SIGNALLING_COMPLEXES	2/1792	13/13198	0.543698	0.757882	0.468964	2	RIPK2,UBC
REACTOME_PASSIVE_TRANSPORT_BY_AQUAPORINS	2/1792	13/13198	0.543698	0.757882	0.468964	2	AQP9,AQP10
REACTOME_POU5F1_OCT4_SOX2_NANOG_ACTIVATE_GENES_RELATED_TO_PROLIFERATION	2/1792	13/13198	0.543698	0.757882	0.468964	2	NR6A1,STAT3
REACTOME_PURINE_SALVAGE	2/1792	13/13198	0.543698	0.757882	0.468964	2	GMPR2,AMPD2
REACTOME_SIGNALING_BY_ACTIVIN	2/1792	13/13198	0.543698	0.757882	0.468964	2	ACVR1B,SMAD4
REACTOME_WNT5A_DEPENDENT_INTERNALIZATION_OF_FZD2_FZD5_AND_ROR2	2/1792	13/13198	0.543698	0.757882	0.468964	2	CLTC,AP2M1
WP_CELLTYPE_DEPENDENT_SELECTIVITY_OF_CCK2R_SIGNALING	2/1792	13/13198	0.543698	0.757882	0.468964	2	GNAQ,PLCB1
WP_DEVELOPMENT_OF_PULMONARY_DENDRITIC_CELLS_AND_MACROPHAGE_SUBSETS	2/1792	13/13198	0.543698	0.757882	0.468964	2	SPI1,STAT3
WP_MAMMARY_GLAND_DEVELOPMENT_PATHWAY_PUBERTY_STAGE_2_OF_4	2/1792	13/13198	0.543698	0.757882	0.468964	2	VIM,TIMP1
WP_NO_METABOLISM_IN_CYSTIC_FIBROSIS	2/1792	13/13198	0.543698	0.757882	0.468964	2	PRMT5,DDAH2
WP_SRF_AND_MIRS_IN_SMOOTH_MUSCLE_DIFFERENTIATION_AND_PROLIFERATION	2/1792	13/13198	0.543698	0.757882	0.468964	2	MEF2D,KLF4
WP_VITAMIN_B12_DISORDERS	2/1792	13/13198	0.543698	0.757882	0.468964	2	TCN1,TCN2
REACTOME_NEUROTRANSMITTER_RELEASE_CYCLE	7/1792	51/13198	0.549497	0.765492	0.473674	7	SYN1,DNAJC5,HSPA8,LIN7A,SLC6A12,PPFIA1,ABAT
REACTOME_NUCLEAR_PORE_COMPLEX_NPC_DISASSEMBLY	5/1792	36/13198	0.551532	0.766905	0.474547	5	NUP50,NUP98,NEK6,NUP214,NUP58
REACTOME_NUCLEOBASE_CATABOLISM	5/1792	36/13198	0.551532	0.766905	0.474547	5	NT5C2,ENTPD1,NUDT5,DPYD,ENTPD4
REACTOME_STRIATED_MUSCLE_CONTRACTION	5/1792	36/13198	0.551532	0.766905	0.474547	5	VIM,TMOD2,TMOD3,TPM3,TPM4
REACTOME_COBALAMIN_CBL_VITAMIN_B12_TRANSPORT_AND_METABOLISM	3/1792	21/13198	0.557484	0.770901	0.477021	3	TCN1,LMBRD1,TCN2
REACTOME_PI_3K_CASCADE_FGFR1	3/1792	21/13198	0.557484	0.770901	0.477021	3	GAB1,KL,GRB2
REACTOME_SHC_MEDIATED_CASCADE_FGFR1	3/1792	21/13198	0.557484	0.770901	0.477021	3	KL,KRAS,GRB2
REACTOME_SYNAPTIC_ADHESION_LIKE_MOLECULES	3/1792	21/13198	0.557484	0.770901	0.477021	3	FLOT2,RTN3,FLOT1
WP_15Q133_COPY_NUMBER_VARIATION_SYNDROME	3/1792	21/13198	0.557484	0.770901	0.477021	3	CREBBP,KAT2B,MTMR10
WP_GLOBO_SPHINGOLIPID_METABOLISM	3/1792	21/13198	0.557484	0.770901	0.477021	3	ST6GALNAC2,ST3GAL2,ST6GALNAC3
WP_NICOTINE_ACTIVITY_ON_DOPAMINERGIC_NEURONS	3/1792	21/13198	0.557484	0.770901	0.477021	3	PRKACA,GNB1,GNG2
WP_SIMPLIFIED_INTERACTION_MAP_BETWEEN_LOXL4_AND_OXIDATIVE_STRESS_PATHWAY	3/1792	21/13198	0.557484	0.770901	0.477021	3	TGFB1,NFE2L2,ANXA5
WP_UREA_CYCLE_AND_METABOLISM_OF_AMINO_GROUPS	3/1792	21/13198	0.557484	0.770901	0.477021	3	OAT,SMS,ARG1
REACTOME_DISEASES_OF_METABOLISM	33/1792	246/13198	0.558752	0.772181	0.477812	33	IDS,VCAN,HEXB,TBXAS1,CTSA,PGM1,ADAMTS2,CSF2RB,C1GALT1,ARSB,GBE1,GALNT3,CFP,CHSY1,NOTCH2,GNS,CYP27A1,THBS1,IDH1,GALNS,UBC,SDC3,GYG1,LMBRD1,GLB1,GAA,TALDO1,OPLAH,EXT1,TCN2,CSF2RA,PAPSS2,NEU1
REACTOME_NEURONAL_SYSTEM	55/1792	410/13198	0.561555	0.775215	0.47969	55	PRKAR2B,SYN1,HOMER3,GNAI3,PRKACA,PANX2,GNB1,MAPK1,PPM1F,DNAJC5,TUBB1,MAPK3,PRKAR1A,HSPA8,CAMKK2,LIN7A,SLC6A12,ALDH2,PRKAR2A,GNAI2,GNB4,RPS6KA1,CREB1,TUBA1B,KCNJ2,TUBA4A,GNG11,ADCY4,PPFIA1,PRKAA1,FLOT2,RTN3,KRAS,MDM2,GLUL,RAC1,FLOT1,PLCB3,NRGN,NPTN,NRG1,KCNJ15,EPB41,AP2M1,PRKCB,TUBA1A,GNB2,GNG5,PLCB1,ABAT,TUBA8,GNG2,TUBB4B,IL1RAP,SIPA1L1
REACTOME_VIRAL_MESSENGER_RNA_SYNTHESIS	6/1792	44/13198	0.561979	0.775215	0.47969	6	POLR2J,NUP50,POLR2C,NUP98,NUP214,NUP58
WP_VITAMIN_A_AND_CAROTENOID_METABOLISM	6/1792	44/13198	0.561979	0.775215	0.47969	6	MAPK1,RARA,RBP7,ALDH1A1,DGAT1,RXRA
REACTOME_G_ALPHA_I_SIGNALLING_EVENTS	54/1792	403/13198	0.564959	0.778388	0.481654	54	PRKAR2B,GNAI3,PDE4A,PRKACA,DHRS9,GNB1,MAPK1,PRKAR1A,CAMKK2,PDE4D,PPP2CA,PRKAR2A,GNAI2,GNB4,CREB1,CCR2,GPSM2,LRP1,S1PR4,GNG11,GNAZ,ADCY4,ANXA1,PPP3CA,PLCB3,RGS18,CXCL16,SDC3,CXCR1,CXCL5,PPBP,PF4,CXCL1,PLB1,CCR1,PRKCD,RGS14,FPR2,FPR1,GNB2,GNG5,CXCR2,P2RY13,PLCB1,RGS6,HCAR2,CCR4,PDE4B,GNG2,LRP10,C5AR1,PSAP,GPSM3,HCAR3
REACTOME_HATS_ACETYLATE_HISTONES	19/1792	142/13198	0.564971	0.778388	0.481654	19	CREBBP,PHF20,JADE1,KAT6A,NCOA1,BRPF3,EP300,SUPT20H,BRD8,KAT2B,DR1,KANSL1,TAF12,MORF4L2,USP22,NCOA2,ATXN7,MORF4L1,MSL1
PID_BARD1_PATHWAY	4/1792	29/13198	0.56808	0.78124	0.483418	4	XRCC5,UBE2D3,UBE2L3,PRKDC
REACTOME_EGR2_AND_SOX10_MEDIATED_INITIATION_OF_SCHWANN_CELL_MYELINATION	4/1792	29/13198	0.56808	0.78124	0.483418	4	HMGCR,NAB1,MPZ,MBP
REACTOME_PIWI_INTERACTING_RNA_PIRNA_BIOGENESIS	4/1792	29/13198	0.56808	0.78124	0.483418	4	POLR2J,HSP90AA1,POLR2C,TDRD9
KEGG_STARCH_AND_SUCROSE_METABOLISM	7/1792	52/13198	0.571089	0.784899	0.485682	7	PGM1,PYGL,GBE1,HK1,HK3,GAA,MGAM
REACTOME_TRANSCRIPTIONAL_REGULATION_OF_GRANULOPOIESIS	12/1792	90/13198	0.573882	0.788257	0.48776	12	SPI1,EP300,CREB1,CDKN1A,RARA,FLI1,IL6R,TAL1,STAT3,CEBPB,RXRA,TFDP1
KEGG_ALLOGRAFT_REJECTION	5/1792	37/13198	0.577054	0.790686	0.489263	5	CD86,HLA-C,HLA-E,HLA-A,HLA-B
REACTOME_INTERACTIONS_OF_VPR_WITH_HOST_CELLULAR_PROTEINS	5/1792	37/13198	0.577054	0.790686	0.489263	5	NUP50,NUP98,KPNA1,NUP214,NUP58
REACTOME_RUNX1_INTERACTS_WITH_CO_FACTORS_WHOSE_PRECISE_EFFECT_ON_RUNX1_TARGETS_IS_NOT_KNOWN	5/1792	37/13198	0.577054	0.790686	0.489263	5	YAF2,SMARCD3,EP300,PHC2,RYBP
WP_FACTORS_AND_PATHWAYS_AFFECTING_INSULINLIKE_GROWTH_FACTOR_IGF1AKT_SIGNALING	5/1792	37/13198	0.577054	0.790686	0.489263	5	TNFRSF1A,GSK3B,PIK3CG,RICTOR,ILK
REACTOME_DEGRADATION_OF_GLI1_BY_THE_PROTEASOME	8/1792	60/13198	0.579241	0.793201	0.490819	8	PRKACA,ITCH,PSME1,PSME3,NUMB,UBC,PSMB8,PSMB3
PID_HNF3B_PATHWAY	6/1792	45/13198	0.58499	0.796207	0.492679	6	NR3C1,CREB1,CEBPB,SP1,NF1,CEBPD
PID_NFAT_TFPATHWAY	6/1792	45/13198	0.58499	0.796207	0.492679	6	PTGS2,ITCH,CTLA4,FOS,JUNB,JUN
BIOCARTA_TRKA_PATHWAY	2/1792	14/13198	0.585322	0.796207	0.492679	2	PRKCB,GRB2
REACTOME_CARNITINE_METABOLISM	2/1792	14/13198	0.585322	0.796207	0.492679	2	MID1IP1,RXRA
REACTOME_DEFECTIVE_EXT2_CAUSES_EXOSTOSES_2	2/1792	14/13198	0.585322	0.796207	0.492679	2	SDC3,EXT1
REACTOME_DEFECTS_IN_COBALAMIN_B12_METABOLISM	2/1792	14/13198	0.585322	0.796207	0.492679	2	LMBRD1,TCN2
REACTOME_GLUTAMATE_AND_GLUTAMINE_METABOLISM	2/1792	14/13198	0.585322	0.796207	0.492679	2	OAT,GLUL
REACTOME_LYSOSPHINGOLIPID_AND_LPA_RECEPTORS	2/1792	14/13198	0.585322	0.796207	0.492679	2	PLPPR2,S1PR4
REACTOME_SYNTHESIS_OF_BILE_ACIDS_AND_BILE_SALTS_VIA_24_HYDROXYCHOLESTEROL	2/1792	14/13198	0.585322	0.796207	0.492679	2	CYP27A1,AMACR
REACTOME_TP53_REGULATES_TRANSCRIPTION_OF_SEVERAL_ADDITIONAL_CELL_DEATH_GENES_WHOSE_SPECIFIC_ROLES_IN_P53_DEPENDENT_APOPTOSIS_REMAIN_UNCERTAIN	2/1792	14/13198	0.585322	0.796207	0.492679	2	NDRG1,BCL6
WP_DOPAMINE_METABOLISM	2/1792	14/13198	0.585322	0.796207	0.492679	2	PRKACA,PPP2CA
REACTOME_REGULATION_OF_RAS_BY_GAPS	9/1792	68/13198	0.586665	0.797553	0.493512	9	CUL3,PSME1,KBTBD7,PSME3,KRAS,UBC,NF1,PSMB8,PSMB3
KEGG_PURINE_METABOLISM	21/1792	159/13198	0.589898	0.79873	0.494241	21	POLR2J,RRM2B,PDE4A,PKM,NT5C2,POLD3,GMPR2,POLR2C,IMPDH1,PDE4D,AMPD2,ADCY4,ENTPD1,PDE5A,PRUNE1,PDE6D,NUDT5,CANT1,PDE4B,ENTPD4,PAPSS2
WP_AMINO_ACID_METABOLISM	12/1792	91/13198	0.590023	0.79873	0.494241	12	OAT,PKM,HAL,SMS,OGDH,ARG1,MPST,AOC3,LDHA,GLUL,IDH1,ALDH1A1
BIOCARTA_CTLA4_PATHWAY	3/1792	22/13198	0.590366	0.79873	0.494241	3	CD86,CTLA4,GRB2
REACTOME_ACYL_CHAIN_REMODELLING_OF_PS	3/1792	22/13198	0.590366	0.79873	0.494241	3	OSBPL8,LPCAT3,MBOAT1
REACTOME_CITRIC_ACID_CYCLE_TCA_CYCLE_	3/1792	22/13198	0.590366	0.79873	0.494241	3	OGDH,SDHB,SDHC
REACTOME_INSERTION_OF_TAIL_ANCHORED_PROTEINS_INTO_THE_ENDOPLASMIC_RETICULUM_MEMBRANE	3/1792	22/13198	0.590366	0.79873	0.494241	3	HMOX1,VAPA,STX5
REACTOME_PINK1_PRKN_MEDIATED_MITOPHAGY	3/1792	22/13198	0.590366	0.79873	0.494241	3	MAP1LC3B,UBC,PINK1
WP_FATTY_ACID_BIOSYNTHESIS	3/1792	22/13198	0.590366	0.79873	0.494241	3	ACSL4,ACSL3,ACSL1
WP_ECTODERM_DIFFERENTIATION	19/1792	144/13198	0.590826	0.798874	0.49433	19	GRAMD1B,PLXNA2,PGM1,TBL1X,TSC22D1,C1GALT1,ST8SIA4,STX16,SKIL,SDCBP,SMAD4,RIT1,ZBTB7B,HMGB2,RAB8B,CTNNB1,GLB1,GAS2L1,BAZ1A
REACTOME_RECOGNITION_OF_DNA_DAMAGE_BY_PCNA_CONTAINING_REPLICATION_COMPLEX	4/1792	30/13198	0.596059	0.804501	0.497812	4	POLD3,WDR48,UBE2B,UBC
REACTOME_SURFACTANT_METABOLISM	4/1792	30/13198	0.596059	0.804501	0.497812	4	CSF2RB,CKAP4,CSF2RA,PGA3
REACTOME_TIGHT_JUNCTION_INTERACTIONS	4/1792	30/13198	0.596059	0.804501	0.497812	4	PARD6A,PARD3,F11R,CLDN5
REACTOME_ACTIVATION_OF_ANTERIOR_HOX_GENES_IN_HINDBRAIN_DEVELOPMENT_DURING_EARLY_EMBRYOGENESIS	16/1792	122/13198	0.599851	0.809134	0.500679	16	POLR2J,CREBBP,KMT2C,EP300,YY1,POLR2C,CNOT6,RBBP5,NCOA3,RARA,NCOR1,KDM6A,JUN,PBX1,RXRA,NCOA6
REACTOME_DNA_DAMAGE_RECOGNITION_IN_GG_NER	5/1792	38/13198	0.601784	0.810772	0.501692	5	YY1,RAD23B,COPS5,UBC,XPC
WP_STRIATED_MUSCLE_CONTRACTION_PATHWAY	5/1792	38/13198	0.601784	0.810772	0.501692	5	VIM,MYL9,ACTN4,TPM3,TPM4
REACTOME_STIMULI_SENSING_CHANNELS	14/1792	107/13198	0.602403	0.811121	0.501908	14	WNK1,CLCN4,OSTM1,MCOLN1,SGK1,TRPM6,RAF1,TTYH3,UBC,TSC22D3,ANO10,TPCN2,MLKL,ANO6
KEGG_PPAR_SIGNALING_PATHWAY	9/1792	69/13198	0.604981	0.814105	0.503755	9	ACSL4,ACSL3,CYP27A1,UBC,ACSL1,ACOX1,ILK,RXRA,GK
PID_A6B1_A6B4_INTEGRIN_PATHWAY	6/1792	46/13198	0.607361	0.816334	0.505134	6	YWHAH,RAC1,YWHAZ,YWHAB,GRB2,RXRA
WP_HEART_DEVELOPMENT	6/1792	46/13198	0.607361	0.816334	0.505134	6	MAPK1,VEGFA,BHLHE40,SMAD4,HEY1,CTNNB1
REACTOME_INTRAFLAGELLAR_TRANSPORT	7/1792	54/13198	0.612741	0.822094	0.508698	7	KIF3C,TUBB1,TTC26,TUBA1B,TUBA4A,TUBA1A,TUBB4B
REACTOME_ION_HOMEOSTASIS	7/1792	54/13198	0.612741	0.822094	0.508698	7	ATP2B4,ATP1B3,ATP2B1,PRKACA,ORAI2,STIM1,SLC8A1
WP_PHOSPHODIESTERASES_IN_NEURONAL_FUNCTION	7/1792	54/13198	0.612741	0.822094	0.508698	7	PDE4A,PDE4D,CREB1,ADCY4,PDE5A,PDE6D,PDE4B
REACTOME_TP53_REGULATES_TRANSCRIPTION_OF_DNA_REPAIR_GENES	8/1792	62/13198	0.617913	0.827432	0.512001	8	POLR2J,CCNK,POLR2C,ELL,CDK12,FOS,JUN,SUPT4H1
WP_MIRNA_REGULATION_OF_DNA_DAMAGE_RESPONSE	12/1792	93/13198	0.621465	0.827432	0.512001	12	BID,RRM2B,CASP8,GADD45B,CDKN1B,CREB1,APAF1,TNFRSF10B,CDKN1A,MDM2,TLK2,PRKDC
BIOCARTA_INTRINSIC_PATHWAY	3/1792	23/13198	0.621624	0.827432	0.512001	3	SERPING1,PROS1,F5
REACTOME_ABORTIVE_ELONGATION_OF_HIV_1_TRANSCRIPT_IN_THE_ABSENCE_OF_TAT	3/1792	23/13198	0.621624	0.827432	0.512001	3	POLR2J,POLR2C,SUPT4H1
REACTOME_BBSOME_MEDIATED_CARGO_TARGETING_TO_CILIUM	3/1792	23/13198	0.621624	0.827432	0.512001	3	RAB3IP,CCT5,BBIP1
REACTOME_DOPAMINE_NEUROTRANSMITTER_RELEASE_CYCLE	3/1792	23/13198	0.621624	0.827432	0.512001	3	SYN1,LIN7A,PPFIA1
REACTOME_FRS_MEDIATED_FGFR1_SIGNALING	3/1792	23/13198	0.621624	0.827432	0.512001	3	KL,KRAS,GRB2
REACTOME_MITOCHONDRIAL_CALCIUM_ION_TRANSPORT	3/1792	23/13198	0.621624	0.827432	0.512001	3	MICU1,YME1L1,MCU
REACTOME_NUCLEOTIDE_SALVAGE	3/1792	23/13198	0.621624	0.827432	0.512001	3	GMPR2,AMPD2,CDA
WP_BLOOD_CLOTTING_CASCADE	3/1792	23/13198	0.621624	0.827432	0.512001	3	VWF,SERPINB2,F5
KEGG_CITRATE_CYCLE_TCA_CYCLE	4/1792	31/13198	0.622926	0.827432	0.512001	4	OGDH,SDHB,IDH1,SDHC
REACTOME_DOWNSTREAM_SIGNALING_OF_ACTIVATED_FGFR1	4/1792	31/13198	0.622926	0.827432	0.512001	4	GAB1,KL,KRAS,GRB2
REACTOME_PYRUVATE_METABOLISM	4/1792	31/13198	0.622926	0.827432	0.512001	4	PDK3,LDHA,SLC16A3,RXRA
WP_ETHANOL_EFFECTS_ON_HISTONE_MODIFICATIONS	4/1792	31/13198	0.622926	0.827432	0.512001	4	ALDH2,KAT2B,ALDH1A1,SLC19A1
REACTOME_N_GLYCAN_ANTENNAE_ELONGATION	2/1792	15/13198	0.624062	0.827432	0.512001	2	ST3GAL4,B4GALT5
REACTOME_ORGANIC_CATION_ANION_ZWITTERION_TRANSPORT	2/1792	15/13198	0.624062	0.827432	0.512001	2	SLC22A15,SLC22A4
REACTOME_YAP1_AND_WWTR1_TAZ_STIMULATED_GENE_EXPRESSION	2/1792	15/13198	0.624062	0.827432	0.512001	2	KAT2B,HIPK1
WP_BIOMARKERS_FOR_PYRIMIDINE_METABOLISM_DISORDERS	2/1792	15/13198	0.624062	0.827432	0.512001	2	RRM2B,DPYD
WP_FATTY_ACID_OMEGA_OXIDATION	2/1792	15/13198	0.624062	0.827432	0.512001	2	ALDH2,ALDH1A1
WP_KENNEDY_PATHWAY_FROM_SPHINGOLIPIDS	2/1792	15/13198	0.624062	0.827432	0.512001	2	PCYT1A,PISD
REACTOME_ASSOCIATION_OF_TRIC_CCT_WITH_TARGET_PROTEINS_DURING_BIOSYNTHESIS	5/1792	39/13198	0.62567	0.828591	0.512718	5	FBXL5,KIF13A,CCT5,STAT3,GBA
REACTOME_SYNTHESIS_OF_PA	5/1792	39/13198	0.62567	0.828591	0.512718	5	AGPAT4,GPAT3,LPCAT1,AGPAT2,AGPAT1
REACTOME_AMYLOID_FIBER_FORMATION	14/1792	109/13198	0.631195	0.835416	0.516941	14	LYZ,TGFBI,USP9X,ITM2B,SORL1,ADAM10,FURIN,UBC,UBE2L6,NCSTN,B2M,BACE1,SIAH1,PSENEN
REACTOME_ANTIGEN_ACTIVATES_B_CELL_RECEPTOR_BCR_LEADING_TO_GENERATION_OF_SECOND_MESSENGERS	11/1792	86/13198	0.63228	0.83597	0.517284	11	BTK,VAV1,SH3KBP1,PIK3AP1,ORAI2,SYK,STIM1,PIK3CD,GRB2,PLCG2,LYN
REACTOME_ION_TRANSPORT_BY_P_TYPE_ATPASES	7/1792	55/13198	0.632727	0.83597	0.517284	7	ATP9A,ATP11B,ATP2B4,ATP11A,ATP1B3,ATP2B1,ATP7A
REACTOME_PYRUVATE_METABOLISM_AND_CITRIC_ACID_TCA_CYCLE	7/1792	55/13198	0.632727	0.83597	0.517284	7	PDK3,OGDH,SDHB,LDHA,SLC16A3,SDHC,RXRA
REACTOME_DEGRADATION_OF_THE_EXTRACELLULAR_MATRIX	18/1792	140/13198	0.636186	0.839783	0.519643	18	CAPN1,CD44,TIMP2,PSEN1,MMP9,TIMP1,CTSD,MMP8,SPP1,ADAM10,FBN2,FURIN,ADAM17,CAST,NCSTN,CTSS,CTSB,ADAM9
WP_MIRNAS_INVOLVEMENT_IN_THE_IMMUNE_RESPONSE_IN_SEPSIS	8/1792	63/13198	0.636523	0.839783	0.519643	8	TAB2,TLR8,MAPK14,IRF1,TLR4,LCN2,REL,RELA
REACTOME_CLASS_B_2_SECRETIN_FAMILY_RECEPTORS_	12/1792	94/13198	0.63673	0.839783	0.519643	12	GNB1,GNB4,ADGRE5,ADGRE2,GNG11,ADGRE3,ADM,CYSLTR2,GNB2,GNG5,GNG2,CD55
REACTOME_REGULATION_OF_GLUCOKINASE_BY_GLUCOKINASE_REGULATORY_PROTEIN	4/1792	32/13198	0.648631	0.85498	0.529047	4	NUP50,NUP98,NUP214,NUP58
WP_DIFFERENTIATION_PATHWAY	6/1792	48/13198	0.65003	0.855822	0.529568	6	TGFB1,VEGFA,IL6R,CXCR1,CSF1R,LEFTY1
WP_NOCGMPPKG_MEDIATED_NEUROPROTECTION	6/1792	48/13198	0.65003	0.855822	0.529568	6	TSPO,CREB1,IL1B,CALM2,PPID,RELA
REACTOME_APC_C_CDC20_MEDIATED_DEGRADATION_OF_CYCLIN_B	3/1792	24/13198	0.651211	0.855878	0.529603	3	UBE2D1,UBC,CDC26
REACTOME_CYTOSOLIC_SULFONATION_OF_SMALL_MOLECULES	3/1792	24/13198	0.651211	0.855878	0.529603	3	TPST1,SULT1B1,PAPSS2
REACTOME_RUNX2_REGULATES_OSTEOBLAST_DIFFERENTIATION	3/1792	24/13198	0.651211	0.855878	0.529603	3	MAPK1,MAPK3,HEY1
REACTOME_DEADENYLATION_DEPENDENT_MRNA_DECAY	7/1792	56/13198	0.652113	0.856563	0.530027	7	DDX6,CNOT6,PAN3,CNOT8,EIF4A2,PATL1,DCP2
REACTOME_COLLAGEN_DEGRADATION	8/1792	64/13198	0.654616	0.85885	0.531442	8	MMP9,CTSD,MMP8,ADAM10,FURIN,ADAM17,CTSB,ADAM9
WP_G1_TO_S_CELL_CYCLE_CONTROL	8/1792	64/13198	0.654616	0.85885	0.531442	8	CDKN1B,E2F3,CREB1,CDKN1A,CDKN2D,CDKN1C,MDM2,TFDP1
WP_LNCRNA_INVOLVEMENT_IN_CANONICAL_WNT_SIGNALING_AND_COLORECTAL_CANCER	13/1792	103/13198	0.655325	0.859281	0.531708	13	GSK3B,CSNK1A1,APC,HNRNPU,ATF3,SENP2,HNRNPK,FRAT1,CTNNB1,CTBP2,JUN,FRAT2,KREMEN1
PID_CIRCADIAN_PATHWAY	2/1792	16/13198	0.659933	0.861813	0.533275	2	ARNTL,BHLHE40
REACTOME_CRMPS_IN_SEMA3A_SIGNALING	2/1792	16/13198	0.659933	0.861813	0.533275	2	PLXNA2,GSK3B
REACTOME_REGULATION_OF_PYRUVATE_DEHYDROGENASE_PDH_COMPLEX	2/1792	16/13198	0.659933	0.861813	0.533275	2	PDK3,RXRA
WP_DEREGULATION_OF_RAB_AND_RAB_EFFECTOR_GENES_IN_BLADDER_CANCER	2/1792	16/13198	0.659933	0.861813	0.533275	2	RAB27A,SYTL3
WP_H19_ACTION_RBE2F1_SIGNALING_AND_CDKBETACATENIN_ACTIVITY	2/1792	16/13198	0.659933	0.861813	0.533275	2	JAG1,CTNNB1
WP_REGULATION_OF_SISTER_CHROMATID_SEPARATION_AT_THE_METAPHASEANAPHASE_TRANSITION	2/1792	16/13198	0.659933	0.861813	0.533275	2	STAG1,RAD21
WP_TCA_CYCLE_AND_DEFICIENCY_OF_PYRUVATE_DEHYDROGENASE_COMPLEX_PDHC	2/1792	16/13198	0.659933	0.861813	0.533275	2	OGDH,IDH1
REACTOME_STABILIZATION_OF_P53	7/1792	57/13198	0.670877	0.87501	0.541441	7	PHF20,PSME1,PSME3,MDM2,UBC,PSMB8,PSMB3
REACTOME_SENESCENCE_ASSOCIATED_SECRETORY_PHENOTYPE_SASP_	14/1792	112/13198	0.672341	0.87501	0.541441	14	UBE2D1,MAPK1,MAPK3,CDKN1B,RPS6KA1,CDKN1A,CDKN2D,UBC,STAT3,FOS,CEBPB,RELA,CDC26,JUN
REACTOME_MITOTIC_PROPHASE	18/1792	143/13198	0.672567	0.87501	0.541441	18	NUP50,MAPK1,LPIN2,MAPK3,RAB2A,NUP98,LMNB1,PPP2CA,BLZF1,NEK6,NUP214,RAB1A,NUP58,LMNA,PRKCB,RAB1B,KMT5A,CNEP1R1
KEGG_ETHER_LIPID_METABOLISM	4/1792	33/13198	0.673144	0.87501	0.541441	4	PAFAH1B1,LPCAT2,LPCAT1,PAFAH1B2
REACTOME_AMINO_ACID_TRANSPORT_ACROSS_THE_PLASMA_MEMBRANE	4/1792	33/13198	0.673144	0.87501	0.541441	4	SLC6A12,SLC6A6,SLC7A7,SLC43A2
WP_INFLAMMATORY_RESPONSE_PATHWAY	4/1792	33/13198	0.673144	0.87501	0.541441	4	TNFRSF1B,TNFRSF1A,CD86,THBS1
WP_MAMMARY_GLAND_DEVELOPMENT_PATHWAY_PREGNANCY_AND_LACTATION_STAGE_3_OF_4	4/1792	33/13198	0.673144	0.87501	0.541441	4	YY1,NR3C1,TPM3,CEBPB
WP_TYPE_I_COLLAGEN_SYNTHESIS_IN_THE_CONTEXT_OF_OSTEOGENESIS_IMPERFECTA	4/1792	33/13198	0.673144	0.87501	0.541441	4	PLOD1,ADAMTS2,P4HA1,MIA3
WP_FOLATE_METABOLISM	9/1792	73/13198	0.673907	0.875497	0.541743	9	FOLR3,SOD2,CAT,IL1B,MTHFS,ABCA1,RELA,SLC19A1,GPX3
REACTOME_TRANSCRIPTIONAL_REGULATION_BY_RUNX2	15/1792	120/13198	0.675359	0.876877	0.542597	15	GSK3B,PSME1,MAPK1,MAPK3,NR3C1,CDKN1A,PSME3,SMAD4,UBC,ITGA5,HEY1,PPM1D,PSMB8,RBM14,PSMB3
WP_DNA_IRDAMAGE_AND_CELLULAR_RESPONSE_VIA_ATR	10/1792	81/13198	0.675936	0.877122	0.542748	10	TP53BP1,POLB,XRCC5,UIMC1,UBE2D3,BCL6,MDM2,PPM1D,SP1,PRKDC
KEGG_HUNTINGTONS_DISEASE	23/1792	182/13198	0.677845	0.879092	0.543967	23	POLR2J,CREBBP,CASP8,RCOR1,EP300,POLR2C,SOD2,SDHB,CREB1,NDUFB3,APAF1,NDUFA1,HIP1,DCTN4,CLTC,SDHC,CREB5,PLCB3,GNAQ,AP2M1,PPID,PLCB1,SP1
REACTOME_BASIGIN_INTERACTIONS	3/1792	25/13198	0.679105	0.879714	0.544352	3	ATP1B3,SLC16A3,SLC7A7
REACTOME_DOWNSTREAM_SIGNALING_OF_ACTIVATED_FGFR3	3/1792	25/13198	0.679105	0.879714	0.544352	3	GAB1,KRAS,GRB2
PID_INTEGRIN1_PATHWAY	8/1792	66/13198	0.689173	0.888017	0.54949	8	PLAUR,VEGFA,SPP1,TGFBI,F13A1,THBS1,ITGA5,CD14
KEGG_FATTY_ACID_METABOLISM	5/1792	42/13198	0.691909	0.888017	0.54949	5	ACSL4,ALDH2,ACSL3,ACSL1,ACOX1
REACTOME_GAMMA_CARBOXYLATION_HYPUSINE_FORMATION_AND_ARYLSULFATASE_ACTIVATION	5/1792	42/13198	0.691909	0.888017	0.54949	5	ARSB,FURIN,DPH3,TPST1,PROS1
WP_EUKARYOTIC_TRANSCRIPTION_INITIATION	5/1792	42/13198	0.691909	0.888017	0.54949	5	POLR2J,POLR2C,TAF12,GTF2B,ILK
WP_MELATONIN_METABOLISM_AND_EFFECTS	5/1792	42/13198	0.691909	0.888017	0.54949	5	GSK3B,ECE1,ARNTL,CSNK1D,CALM2
WP_SPLICING_FACTOR_NOVA_REGULATED_SYNAPTIC_PROTEINS	5/1792	42/13198	0.691909	0.888017	0.54949	5	ATP2B1,STXBP2,APLP2,EPB41,CDH2
WP_TRYPTOPHAN_METABOLISM	5/1792	42/13198	0.691909	0.888017	0.54949	5	OGDH,ALDH2,KYNU,CAT,ALDH1A1
KEGG_DILATED_CARDIOMYOPATHY	11/1792	90/13198	0.692681	0.888017	0.54949	11	ITGA2B,PRKACA,ITGB5,TGFB1,ADCY4,TPM3,LMNA,ITGA5,TPM4,SLC8A1,ITGB3
WP_NCRNAS_INVOLVED_IN_WNT_SIGNALING_IN_HEPATOCELLULAR_CARCINOMA	11/1792	90/13198	0.692681	0.888017	0.54949	11	GSK3B,CSNK1A1,APC,KLF4,SENP2,FRAT1,CTNNB1,CTBP2,JUN,FRAT2,KREMEN1
KEGG_RENIN_ANGIOTENSIN_SYSTEM	2/1792	17/13198	0.693	0.888017	0.54949	2	CTSA,MME
REACTOME_ACYL_CHAIN_REMODELLING_OF_PI	2/1792	17/13198	0.693	0.888017	0.54949	2	PLBD1,MBOAT7
REACTOME_IL_6_TYPE_CYTOKINE_RECEPTOR_LIGAND_INTERACTIONS	2/1792	17/13198	0.693	0.888017	0.54949	2	OSM,JAK1
REACTOME_METABOLISM_OF_FOLATE_AND_PTERINES	2/1792	17/13198	0.693	0.888017	0.54949	2	MTHFS,SLC19A1
REACTOME_PROTEIN_METHYLATION	2/1792	17/13198	0.693	0.888017	0.54949	2	HSPA8,VCP
REACTOME_SIGNALING_BY_NTRK3_TRKC_	2/1792	17/13198	0.693	0.888017	0.54949	2	KRAS,GRB2
REACTOME_TRAFFICKING_OF_GLUR2_CONTAINING_AMPA_RECEPTORS	2/1792	17/13198	0.693	0.888017	0.54949	2	AP2M1,PRKCB
WP_ACE_INHIBITOR_PATHWAY	2/1792	17/13198	0.693	0.888017	0.54949	2	TGFB1,ATP6AP2
WP_DRUG_INDUCTION_OF_BILE_ACID_PATHWAY	2/1792	17/13198	0.693	0.888017	0.54949	2	ABCC3,VDR
WP_PYRIMIDINE_METABOLISM_AND_RELATED_DISEASES	2/1792	17/13198	0.693	0.888017	0.54949	2	RRM2B,DPYD
KEGG_CYSTEINE_AND_METHIONINE_METABOLISM	4/1792	34/13198	0.696446	0.89142	0.551595	4	SMS,AMD1,MPST,LDHA
WP_FLUOROPYRIMIDINE_ACTIVITY	4/1792	34/13198	0.696446	0.89142	0.551595	4	ABCC3,GGH,CDA,DPYD
NABA_ECM_REGULATORS	30/1792	238/13198	0.698945	0.89411	0.55326	30	SERPINB1,TIMP2,CTSA,PLOD1,ADAMTS2,MMP9,CTSZ,TIMP1,CTSD,MMP8,CSTA,P4HA1,F13A1,TGM3,ADAM19,EGLN1,ADAM10,PCSK6,SERPING1,ADAM17,CSTB,CTSS,CTSB,SERPINB8,ADAM9,HPSE,SULF2,SERPINA1,SERPINB2,EGLN2
REACTOME_HCMV_EARLY_EVENTS	17/1792	138/13198	0.704678	0.898677	0.556086	17	NUP50,TUBB1,TBL1X,CBX1,NUP98,CREB1,TUBA1B,NUP214,TUBA4A,DYNC1LI2,NUP58,NCOR1,DYNC1LI1,TUBA1A,TBL1XR1,TUBA8,TUBB4B
REACTOME_A_TETRASACCHARIDE_LINKER_SEQUENCE_IS_REQUIRED_FOR_GAG_SYNTHESIS	3/1792	26/13198	0.705306	0.898677	0.556086	3	VCAN,XYLT1,SDC3
REACTOME_APC_CDC20_MEDIATED_DEGRADATION_OF_NEK2A	3/1792	26/13198	0.705306	0.898677	0.556086	3	UBE2D1,UBC,CDC26
REACTOME_METAL_ION_SLC_TRANSPORTERS	3/1792	26/13198	0.705306	0.898677	0.556086	3	SLC31A1,SLC40A1,SLC39A1
WP_CYTOKINES_AND_INFLAMMATORY_RESPONSE	3/1792	26/13198	0.705306	0.898677	0.556086	3	TGFB1,IL1B,CXCL1
WP_GLUCURONIDATION	3/1792	26/13198	0.705306	0.898677	0.556086	3	PGM1,PGM5,HK1
WP_MAMMALIAN_DISORDER_OF_SEXUAL_DEVELOPMENT	3/1792	26/13198	0.705306	0.898677	0.556086	3	CTNNB1,PBX1,INSL3
KEGG_HYPERTROPHIC_CARDIOMYOPATHY_HCM	10/1792	83/13198	0.705958	0.899	0.556286	10	ITGA2B,ITGB5,TGFB1,PRKAA1,TPM3,LMNA,ITGA5,TPM4,SLC8A1,ITGB3
KEGG_RNA_DEGRADATION	7/1792	59/13198	0.706467	0.89914	0.556373	7	PAPOLA,DDX6,CNOT6,PAPOLG,CNOT8,PATL1,DCP2
REACTOME_METABOLISM_OF_NUCLEOTIDES	12/1792	99/13198	0.707927	0.900489	0.557207	12	RRM2B,NT5C2,GMPR2,IMPDH1,AMPD2,TXN,ENTPD1,CDA,NUDT5,GLRX,DPYD,ENTPD4
REACTOME_FORMATION_OF_INCISION_COMPLEX_IN_GG_NER	5/1792	43/13198	0.71211	0.90428	0.559553	5	PIAS1,RAD23B,UBC,XPC,RNF111
REACTOME_SIGNALING_BY_FGFR2_IN_DISEASE	5/1792	43/13198	0.71211	0.90428	0.559553	5	POLR2J,POLR2C,GAB1,KRAS,GRB2
REACTOME_SIGNALING_BY_RETINOIC_ACID	5/1792	43/13198	0.71211	0.90428	0.559553	5	PDK3,DHRS9,RARA,ALDH1A1,RXRA
REACTOME_METABOLISM_OF_STEROID_HORMONES	4/1792	35/13198	0.718532	0.911921	0.564281	4	STARD3NL,TSPO,HSD17B12,HSD17B11
REACTOME_SCF_SKP2_MEDIATED_DEGRADATION_OF_P27_P21	7/1792	60/13198	0.723271	0.913422	0.56521	7	PSME1,CDKN1B,CDKN1A,PSME3,UBC,PSMB8,PSMB3
WP_PREIMPLANTATION_EMBRYO	7/1792	60/13198	0.723271	0.913422	0.56521	7	MXD1,AQP9,FOSB,ZFP36,KLF4,DDIT3,PBX1
KEGG_PHENYLALANINE_METABOLISM	2/1792	18/13198	0.723362	0.913422	0.56521	2	AOC3,AOC2
REACTOME_ACYL_CHAIN_REMODELLING_OF_PG	2/1792	18/13198	0.723362	0.913422	0.56521	2	LPGAT1,LPCAT1
REACTOME_MECP2_REGULATES_NEURONAL_RECEPTORS_AND_CHANNELS	2/1792	18/13198	0.723362	0.913422	0.56521	2	SLC2A3,CREB1
REACTOME_PI_3K_CASCADE_FGFR3	2/1792	18/13198	0.723362	0.913422	0.56521	2	GAB1,GRB2
REACTOME_PURINE_CATABOLISM	2/1792	18/13198	0.723362	0.913422	0.56521	2	NT5C2,NUDT5
REACTOME_SEROTONIN_NEUROTRANSMITTER_RELEASE_CYCLE	2/1792	18/13198	0.723362	0.913422	0.56521	2	SYN1,PPFIA1
REACTOME_SHC_MEDIATED_CASCADE_FGFR3	2/1792	18/13198	0.723362	0.913422	0.56521	2	KRAS,GRB2
KEGG_AUTOIMMUNE_THYROID_DISEASE	6/1792	52/13198	0.726355	0.916175	0.566914	6	CD86,CTLA4,HLA-C,HLA-E,HLA-A,HLA-B
WP_SYNAPTIC_VESICLE_PATHWAY	6/1792	52/13198	0.726355	0.916175	0.566914	6	SYN1,DNM2,CLTC,AP2M1,STX3,DNM3
REACTOME_DOWNSTREAM_SIGNALING_OF_ACTIVATED_FGFR4	3/1792	27/13198	0.729836	0.917997	0.568041	3	GAB1,KRAS,GRB2
REACTOME_EFFECTS_OF_PIP2_HYDROLYSIS	3/1792	27/13198	0.729836	0.917997	0.568041	3	DGKG,PRKCD,DAGLB
REACTOME_FGFR2_ALTERNATIVE_SPLICING	3/1792	27/13198	0.729836	0.917997	0.568041	3	POLR2J,POLR2C,TIA1
REACTOME_G0_AND_EARLY_G1	3/1792	27/13198	0.729836	0.917997	0.568041	3	MAX,DYRK1A,TFDP1
WP_INTRAFLAGELLAR_TRANSPORT_PROTEINS_BINDING_TO_DYNEIN	3/1792	27/13198	0.729836	0.917997	0.568041	3	DYNC1LI2,DYNC1LI1,DYNLT1
WP_RENIN_ANGIOTENSIN_ALDOSTERONE_SYSTEM_RAAS	5/1792	44/13198	0.731358	0.919398	0.568908	5	CREB1,CALM2,CREB5,GNAQ,CALM3
REACTOME_TNFR2_NON_CANONICAL_NF_KB_PATHWAY	12/1792	101/13198	0.733828	0.921989	0.570511	12	TNFRSF1B,TNFRSF1A,PSME1,TNFSF13B,LTBR,TNFSF4,TNFSF14,UBE2M,PSME3,UBC,PSMB8,PSMB3
REACTOME_REGULATION_OF_PTEN_STABILITY_AND_ACTIVITY	8/1792	69/13198	0.736744	0.925137	0.572459	8	PSME1,PSME3,MKRN1,UBC,WWP2,PSMB8,TRIM27,PSMB3
REACTOME_INTERLEUKIN_7_SIGNALING	4/1792	36/13198	0.739407	0.926932	0.57357	4	JAK3,JAK1,STAT3,STAT5B
REACTOME_TRANSPORT_OF_THE_SLBP_DEPENDANT_MATURE_MRNA	4/1792	36/13198	0.739407	0.926932	0.57357	4	NUP50,NUP98,NUP214,NUP58
WP_ROLE_OF_OSX_AND_MIRNAS_IN_TOOTH_DEVELOPMENT	4/1792	36/13198	0.739407	0.926932	0.57357	4	NOTCH2,KLF4,ALPL,CTNNB1
REACTOME_FORMATION_OF_TC_NER_PRE_INCISION_COMPLEX	6/1792	53/13198	0.743484	0.93049	0.575771	6	POLR2J,EP300,POLR2C,COPS5,UBC,ISY1
WP_TRANSLATION_FACTORS	6/1792	53/13198	0.743484	0.93049	0.575771	6	EIF2AK2,EIF4G3,ETF1,EIF4EBP2,EIF4A2,EIF1
WP_VITAMIN_B12_METABOLISM	6/1792	53/13198	0.743484	0.93049	0.575771	6	SOD2,IL1B,TCN1,ABCA1,RELA,TCN2
REACTOME_NUCLEOTIDE_EXCISION_REPAIR	13/1792	110/13198	0.746124	0.933188	0.577441	13	POLR2J,PIAS1,POLD3,EP300,YY1,POLR2C,ELL,RAD23B,COPS5,UBC,XPC,RNF111,ISY1
REACTOME_TRANSPORT_OF_BILE_SALTS_AND_ORGANIC_ACIDS_METAL_IONS_AND_AMINE_COMPOUNDS	10/1792	86/13198	0.747567	0.933188	0.577441	10	SLC6A12,SLC44A2,SLC6A6,SLC31A1,SLC40A1,SLC16A3,SLC39A1,SLC22A15,SLC22A4,SLC5A3
BIOCARTA_ERAD_PATHWAY	2/1792	19/13198	0.751144	0.933188	0.577441	2	MAN1A1,UGGT1
REACTOME_ASSEMBLY_OF_ACTIVE_LPL_AND_LIPC_LIPASE_COMPLEXES	2/1792	19/13198	0.751144	0.933188	0.577441	2	PCSK6,FURIN
REACTOME_NA_CL_DEPENDENT_NEUROTRANSMITTER_TRANSPORTERS	2/1792	19/13198	0.751144	0.933188	0.577441	2	SLC6A12,SLC6A6
REACTOME_PLASMA_LIPOPROTEIN_ASSEMBLY	2/1792	19/13198	0.751144	0.933188	0.577441	2	PRKACA,ABCA1
REACTOME_SCAVENGING_BY_CLASS_A_RECEPTORS	2/1792	19/13198	0.751144	0.933188	0.577441	2	FTL,FTH1
REACTOME_SIGNALING_BY_FGFR2_IIIA_TM	2/1792	19/13198	0.751144	0.933188	0.577441	2	POLR2J,POLR2C
REACTOME_SYNTHESIS_SECRETION_AND_DEACYLATION_OF_GHRELIN	2/1792	19/13198	0.751144	0.933188	0.577441	2	KLF4,SEC11A
REACTOME_TRANSCRIPTION_OF_E2F_TARGETS_UNDER_NEGATIVE_CONTROL_BY_DREAM_COMPLEX	2/1792	19/13198	0.751144	0.933188	0.577441	2	MAX,TFDP1
REACTOME_TRANSLESION_SYNTHESIS_BY_POLH	2/1792	19/13198	0.751144	0.933188	0.577441	2	UBC,VCP
SA_CASPASE_CASCADE	2/1792	19/13198	0.751144	0.933188	0.577441	2	CASP8,APAF1
WP_SMALL_LIGAND_GPCRS	2/1792	19/13198	0.751144	0.933188	0.577441	2	S1PR4,PTAFR
WP_HISTONE_MODIFICATIONS	8/1792	70/13198	0.751435	0.933188	0.577441	8	KMT2E,KMT2C,ASH1L,PRDM2,SETD7,NSD1,SETD2,KMT5A
REACTOME_TRP_CHANNELS	3/1792	28/13198	0.75273	0.933766	0.577799	3	MCOLN1,TRPM6,MLKL
ST_GAQ_PATHWAY	3/1792	28/13198	0.75273	0.933766	0.577799	3	PHKA2,PIK3CB,GNAQ
REACTOME_DECTIN_1_MEDIATED_NONCANONICAL_NF_KB_SIGNALING	7/1792	62/13198	0.754867	0.935903	0.579121	7	PSME1,UBE2M,PSME3,UBC,RELA,PSMB8,PSMB3
REACTOME_ABC_FAMILY_PROTEINS_MEDIATED_TRANSPORT	12/1792	103/13198	0.758185	0.939431	0.581304	12	SEL1L,ABCC6,PSME1,ABCC3,PSME3,OS9,RNF185,UBC,ABCG1,VCP,PSMB8,PSMB3
REACTOME_NEGATIVE_REGULATION_OF_NOTCH4_SIGNALING	6/1792	54/13198	0.759827	0.939431	0.581304	6	PSME1,PSME3,UBC,YWHAZ,PSMB8,PSMB3
REACTOME_SUMOYLATION_OF_DNA_REPLICATION_PROTEINS	5/1792	46/13198	0.767007	0.939431	0.581304	5	NUP50,NUP98,NUP214,NUP58,TOP1
BIOCARTA_CPSF_PATHWAY	1/1792	10/13198	0.767716	0.939431	0.581304	1	PAPOLA
BIOCARTA_DNAFRAGMENT_PATHWAY	1/1792	10/13198	0.767716	0.939431	0.581304	1	HMGB2
BIOCARTA_FREE_PATHWAY	1/1792	10/13198	0.767716	0.939431	0.581304	1	RELA
BIOCARTA_GABA_PATHWAY	1/1792	10/13198	0.767716	0.939431	0.581304	1	GABARAP
BIOCARTA_SKP2E2F_PATHWAY	1/1792	10/13198	0.767716	0.939431	0.581304	1	TFDP1
PID_VEGF_VEGFR_PATHWAY	1/1792	10/13198	0.767716	0.939431	0.581304	1	VEGFA
REACTOME_ABACAVIR_TRANSPORT_AND_METABOLISM	1/1792	10/13198	0.767716	0.939431	0.581304	1	NT5C2
REACTOME_ACTIVATION_OF_PPARGC1A_PGC_1ALPHA_BY_PHOSPHORYLATION	1/1792	10/13198	0.767716	0.939431	0.581304	1	MAPK14
REACTOME_ADENYLATE_CYCLASE_ACTIVATING_PATHWAY	1/1792	10/13198	0.767716	0.939431	0.581304	1	ADCY4
REACTOME_CALCITONIN_LIKE_LIGAND_RECEPTORS	1/1792	10/13198	0.767716	0.939431	0.581304	1	ADM
REACTOME_FOLDING_OF_ACTIN_BY_CCT_TRIC	1/1792	10/13198	0.767716	0.939431	0.581304	1	CCT5
REACTOME_HDL_REMODELING	1/1792	10/13198	0.767716	0.939431	0.581304	1	ABCG1
REACTOME_MASTL_FACILITATES_MITOTIC_PROGRESSION	1/1792	10/13198	0.767716	0.939431	0.581304	1	PPP2CA
REACTOME_NEUROTRANSMITTER_CLEARANCE	1/1792	10/13198	0.767716	0.939431	0.581304	1	ALDH2
REACTOME_PROCESSING_AND_ACTIVATION_OF_SUMO	1/1792	10/13198	0.767716	0.939431	0.581304	1	SENP2
REACTOME_ROLE_OF_SECOND_MESSENGERS_IN_NETRIN_1_SIGNALING	1/1792	10/13198	0.767716	0.939431	0.581304	1	PITPNA
REACTOME_UREA_CYCLE	1/1792	10/13198	0.767716	0.939431	0.581304	1	ARG1
REACTOME_ZINC_INFLUX_INTO_CELLS_BY_THE_SLC39_GENE_FAMILY	1/1792	10/13198	0.767716	0.939431	0.581304	1	SLC39A1
WP_LIVER_X_RECEPTOR_PATHWAY	1/1792	10/13198	0.767716	0.939431	0.581304	1	RXRA
WP_STEROID_BIOSYNTHESIS	1/1792	10/13198	0.767716	0.939431	0.581304	1	HSD17B4
WP_TRANSSULFURATION_PATHWAY	1/1792	10/13198	0.767716	0.939431	0.581304	1	MPST
REACTOME_NCAM_SIGNALING_FOR_NEURITE_OUT_GROWTH	7/1792	63/13198	0.76966	0.941299	0.58246	7	MAPK1,MAPK3,ST8SIA4,CREB1,KRAS,PTK2,GRB2
REACTOME_INTERCONVERSION_OF_NUCLEOTIDE_DI_AND_TRIPHOSPHATES	3/1792	29/13198	0.774036	0.941982	0.582882	3	RRM2B,TXN,GLRX
REACTOME_MITOPHAGY	3/1792	29/13198	0.774036	0.941982	0.582882	3	MAP1LC3B,UBC,PINK1
REACTOME_PEROXISOMAL_LIPID_METABOLISM	3/1792	29/13198	0.774036	0.941982	0.582882	3	HSD17B4,ACOX1,AMACR
WP_GASTRIC_CANCER_NETWORK_1	3/1792	29/13198	0.774036	0.941982	0.582882	3	ECT2,APC,S100P
WP_DNA_IRDOUBLE_STRAND_BREAKS_DSBS_AND_CELLULAR_RESPONSE_VIA_ATM	6/1792	55/13198	0.77539	0.941982	0.582882	6	BID,BAK1,TP53BP1,APAF1,MDM2,PRKDC
REACTOME_ABERRANT_REGULATION_OF_MITOTIC_EXIT_IN_CANCER_DUE_TO_RB1_DEFECTS	2/1792	20/13198	0.776487	0.941982	0.582882	2	UBE2D1,CDC26
REACTOME_CONVERSION_FROM_APC_C_CDC20_TO_APC_C_CDH1_IN_LATE_ANAPHASE	2/1792	20/13198	0.776487	0.941982	0.582882	2	UBE2D1,CDC26
REACTOME_DEFECTIVE_B4GALT7_CAUSES_EDS_PROGEROID_TYPE	2/1792	20/13198	0.776487	0.941982	0.582882	2	VCAN,SDC3
REACTOME_FRS_MEDIATED_FGFR3_SIGNALING	2/1792	20/13198	0.776487	0.941982	0.582882	2	KRAS,GRB2
REACTOME_PHOSPHORYLATION_OF_THE_APC_C	2/1792	20/13198	0.776487	0.941982	0.582882	2	UBE2D1,CDC26
REACTOME_PI_3K_CASCADE_FGFR4	2/1792	20/13198	0.776487	0.941982	0.582882	2	GAB1,GRB2
REACTOME_RECEPTOR_TYPE_TYROSINE_PROTEIN_PHOSPHATASES	2/1792	20/13198	0.776487	0.941982	0.582882	2	PPFIA1,IL1RAP
REACTOME_SHC_MEDIATED_CASCADE_FGFR4	2/1792	20/13198	0.776487	0.941982	0.582882	2	KRAS,GRB2
REACTOME_SYNTHESIS_SECRETION_AND_INACTIVATION_OF_GLUCAGON_LIKE_PEPTIDE_1_GLP_1_	2/1792	20/13198	0.776487	0.941982	0.582882	2	SEC11A,CTNNB1
ST_WNT_CA2_CYCLIC_GMP_PATHWAY	2/1792	20/13198	0.776487	0.941982	0.582882	2	NFAT5,PDE6D
WP_FBXL10_ENHANCEMENT_OF_MAPERK_SIGNALING_IN_DIFFUSE_LARGE_BCELL_LYMPHOMA	4/1792	38/13198	0.777593	0.942816	0.583398	4	MAPK1,MAPK3,BCL6,DUSP6
REACTOME_ANTIMICROBIAL_PEPTIDES	11/1792	97/13198	0.782683	0.948477	0.586902	11	PGLYRP1,LYZ,CLU,CCR2,S100A8,LCN2,S100A9,CAMP,ATP7A,RNASE6,TLR1
REACTOME_DOWNSTREAM_SIGNALING_OF_ACTIVATED_FGFR2	3/1792	30/13198	0.793811	0.956055	0.59159	3	GAB1,KRAS,GRB2
PID_ATR_PATHWAY	4/1792	39/13198	0.794955	0.956055	0.59159	4	PPP2CA,MDM2,YWHAZ,YWHAB
BIOCARTA_LEPTIN_PATHWAY	1/1792	11/13198	0.799279	0.956055	0.59159	1	PRKAA1
BIOCARTA_VITCB_PATHWAY	1/1792	11/13198	0.799279	0.956055	0.59159	1	SLC2A3
PID_P38_GAMMA_DELTA_PATHWAY	1/1792	11/13198	0.799279	0.956055	0.59159	1	MAP3K20
REACTOME_ACTIVATION_OF_THE_PHOTOTRANSDUCTION_CASCADE	1/1792	11/13198	0.799279	0.956055	0.59159	1	GNB1
REACTOME_ANDROGEN_BIOSYNTHESIS	1/1792	11/13198	0.799279	0.956055	0.59159	1	HSD17B12
REACTOME_CDC6_ASSOCIATION_WITH_THE_ORC_ORIGIN_COMPLEX	1/1792	11/13198	0.799279	0.956055	0.59159	1	E2F3
REACTOME_CLEC7A_DECTIN_1_INDUCES_NFAT_ACTIVATION	1/1792	11/13198	0.799279	0.956055	0.59159	1	PPP3CA
REACTOME_CREATINE_METABOLISM	1/1792	11/13198	0.799279	0.956055	0.59159	1	SLC6A12
REACTOME_DIGESTION_OF_DIETARY_CARBOHYDRATE	1/1792	11/13198	0.799279	0.956055	0.59159	1	MGAM
REACTOME_PYRIMIDINE_SALVAGE	1/1792	11/13198	0.799279	0.956055	0.59159	1	CDA
REACTOME_RECEPTOR_MEDIATED_MITOPHAGY	1/1792	11/13198	0.799279	0.956055	0.59159	1	MAP1LC3B
REACTOME_REMOVAL_OF_THE_FLAP_INTERMEDIATE_FROM_THE_C_STRAND	1/1792	11/13198	0.799279	0.956055	0.59159	1	POLD3
REACTOME_SLBP_DEPENDENT_PROCESSING_OF_REPLICATION_DEPENDENT_HISTONE_PRE_MRNAS	1/1792	11/13198	0.799279	0.956055	0.59159	1	LSM10
REACTOME_VITAMIN_D_CALCIFEROL_METABOLISM	1/1792	11/13198	0.799279	0.956055	0.59159	1	VDR
WP_NUCLEOTIDE_GPCRS	1/1792	11/13198	0.799279	0.956055	0.59159	1	LTB4R
REACTOME_BLOOD_GROUP_SYSTEMS_BIOSYNTHESIS	2/1792	21/13198	0.79954	0.956055	0.59159	2	ST3GAL4,FUT7
REACTOME_CELLULAR_HEXOSE_TRANSPORT	2/1792	21/13198	0.79954	0.956055	0.59159	2	SLC2A3,SLC2A14
REACTOME_INHIBITION_OF_THE_PROTEOLYTIC_ACTIVITY_OF_APC_C_REQUIRED_FOR_THE_ONSET_OF_ANAPHASE_BY_MITOTIC_SPINDLE_CHECKPOINT_COMPONENTS	2/1792	21/13198	0.79954	0.956055	0.59159	2	UBE2D1,CDC26
REACTOME_PCNA_DEPENDENT_LONG_PATCH_BASE_EXCISION_REPAIR	2/1792	21/13198	0.79954	0.956055	0.59159	2	POLB,POLD3
REACTOME_REGULATION_OF_FZD_BY_UBIQUITINATION	2/1792	21/13198	0.79954	0.956055	0.59159	2	USP8,UBC
REACTOME_ZBP1_DAI_MEDIATED_INDUCTION_OF_TYPE_I_IFNS	2/1792	21/13198	0.79954	0.956055	0.59159	2	RELA,TBK1
WP_OXYSTEROLS_DERIVED_FROM_CHOLESTEROL	2/1792	21/13198	0.79954	0.956055	0.59159	2	NR1H2,CYP27A1
WP_UREA_CYCLE_AND_ASSOCIATED_PATHWAYS	2/1792	21/13198	0.79954	0.956055	0.59159	2	OAT,ARG1
REACTOME_DEGRADATION_OF_DVL	6/1792	57/13198	0.804219	0.96114	0.594737	6	CUL3,PSME1,PSME3,UBC,PSMB8,PSMB3
REACTOME_HCMV_LATE_EVENTS	13/1792	116/13198	0.810125	0.967504	0.598675	13	TSG101,NUP50,NUP98,CHMP3,NUP214,CHMP2A,NUP58,VPS37B,VPS37A,UBAP1,HNRNPK,VPS37C,CEBPD
KEGG_TRYPTOPHAN_METABOLISM	4/1792	40/13198	0.811209	0.967504	0.598675	4	OGDH,ALDH2,KYNU,CAT
REACTOME_HS_GAG_BIOSYNTHESIS	3/1792	31/13198	0.81212	0.967504	0.598675	3	NDST1,SDC3,EXT1
REACTOME_TRAFFICKING_OF_AMPA_RECEPTORS	3/1792	31/13198	0.81212	0.967504	0.598675	3	MDM2,AP2M1,PRKCB
WP_OLIGODENDROCYTE_SPECIFICATION_AND_DIFFERENTIATION_LEADING_TO_MYELIN_COMPONENTS_FOR_CNS	3/1792	31/13198	0.81212	0.967504	0.598675	3	IL1B,CXCL1,MBP
WP_ONE_CARBON_METABOLISM	3/1792	31/13198	0.81212	0.967504	0.598675	3	MTHFS,GLRX,TCN2
WP_PEPTIDE_GPCRS	8/1792	75/13198	0.816178	0.971826	0.601349	8	CCR2,CXCR1,CCR1,FPR2,FPR1,CXCR2,CCR4,C5AR1
WP_PROXIMAL_TUBULE_TRANSPORT	6/1792	58/13198	0.817514	0.972298	0.601642	6	ATP6V1D,ATP6V0E1,ATP6V1A,ATP6V0B,ATP6V1E1,SLC7A7
PID_HEDGEHOG_2PATHWAY	2/1792	22/13198	0.820457	0.972298	0.601642	2	ARRB2,LRPAP1
REACTOME_CD28_DEPENDENT_PI3K_AKT_SIGNALING	2/1792	22/13198	0.820457	0.972298	0.601642	2	CD86,RICTOR
REACTOME_DEFECTS_IN_VITAMIN_AND_COFACTOR_METABOLISM	2/1792	22/13198	0.820457	0.972298	0.601642	2	LMBRD1,TCN2
REACTOME_E2F_MEDIATED_REGULATION_OF_DNA_REPLICATION	2/1792	22/13198	0.820457	0.972298	0.601642	2	PPP2CA,TFDP1
REACTOME_FRS_MEDIATED_FGFR4_SIGNALING	2/1792	22/13198	0.820457	0.972298	0.601642	2	KRAS,GRB2
REACTOME_RA_BIOSYNTHESIS_PATHWAY	2/1792	22/13198	0.820457	0.972298	0.601642	2	DHRS9,ALDH1A1
WP_COMPLEMENT_ACTIVATION	2/1792	22/13198	0.820457	0.972298	0.601642	2	CFP,CD55
WP_PURINE_METABOLISM_AND_RELATED_DISORDERS	2/1792	22/13198	0.820457	0.972298	0.601642	2	RRM2B,IMPDH1
WP_PPAR_SIGNALING_PATHWAY	7/1792	67/13198	0.822272	0.973937	0.602655	7	ACSL4,ACSL3,CYP27A1,ACSL1,ACOX1,ILK,RXRA
REACTOME_GLUTATHIONE_SYNTHESIS_AND_RECYCLING	1/1792	12/13198	0.826555	0.974401	0.602943	1	OPLAH
REACTOME_LYSINE_CATABOLISM	1/1792	12/13198	0.826555	0.974401	0.602943	1	OGDH
REACTOME_MISCELLANEOUS_SUBSTRATES	1/1792	12/13198	0.826555	0.974401	0.602943	1	CYP4F3
REACTOME_P2Y_RECEPTORS	1/1792	12/13198	0.826555	0.974401	0.602943	1	P2RY13
REACTOME_PURINE_RIBONUCLEOSIDE_MONOPHOSPHATE_BIOSYNTHESIS	1/1792	12/13198	0.826555	0.974401	0.602943	1	IMPDH1
REACTOME_PYRIMIDINE_CATABOLISM	1/1792	12/13198	0.826555	0.974401	0.602943	1	DPYD
WP_ALANINE_AND_ASPARTATE_METABOLISM	1/1792	12/13198	0.826555	0.974401	0.602943	1	ABAT
WP_BIOMARKERS_FOR_UREA_CYCLE_DISORDERS	1/1792	12/13198	0.826555	0.974401	0.602943	1	ARG1
WP_THE_ALTERNATIVE_PATHWAY_OF_FETAL_ANDROGEN_SYNTHESIS	1/1792	12/13198	0.826555	0.974401	0.602943	1	POR
REACTOME_CROSS_PRESENTATION_OF_SOLUBLE_EXOGENOUS_ANTIGENS_ENDOSOMES_	5/1792	50/13198	0.827322	0.974795	0.603187	5	PSME1,PSME3,FCGR1A,PSMB8,PSMB3
REACTOME_PLASMA_LIPOPROTEIN_REMODELING	3/1792	32/13198	0.829032	0.975791	0.603803	3	PCSK6,FURIN,ABCG1
WP_DEVELOPMENT_AND_HETEROGENEITY_OF_THE_ILC_FAMILY	3/1792	32/13198	0.829032	0.975791	0.603803	3	AHR,IL1B,NFIL3
REACTOME_NON_INTEGRIN_MEMBRANE_ECM_INTERACTIONS	6/1792	59/13198	0.830085	0.97652	0.604254	6	ACTN1,ITGB5,TGFB1,THBS1,SDC3,ITGB3
REACTOME_DISEASES_OF_GLYCOSYLATION	16/1792	143/13198	0.831469	0.977638	0.604945	16	VCAN,HEXB,CTSA,PGM1,ADAMTS2,C1GALT1,GALNT3,CFP,CHSY1,NOTCH2,THBS1,SDC3,GLB1,EXT1,PAPSS2,NEU1
REACTOME_CYCLIN_A_CDK2_ASSOCIATED_EVENTS_AT_S_PHASE_ENTRY	9/1792	85/13198	0.832752	0.978635	0.605563	9	PSME1,CDKN1B,CDKN1A,MAX,PSME3,UBC,TFDP1,PSMB8,PSMB3
REACTOME_UCH_PROTEINASES	11/1792	102/13198	0.834319	0.979456	0.60607	11	PSME1,YY1,TGFB1,TGFBR1,PSME3,USP15,ASXL2,UBC,TGFBR2,PSMB8,PSMB3
WP_22Q112_DELETION_SYNDROME	11/1792	102/13198	0.834319	0.979456	0.60607	11	OAT,DGCR2,CDC42,CRKL,SHOC2,VWF,RAF1,GP9,CLDN5,GP1BA,PPP1CB
REACTOME_DISORDERS_OF_TRANSMEMBRANE_TRANSPORTERS	20/1792	176/13198	0.83486	0.979581	0.606148	20	SEL1L,ABCC6,PSME1,NUP50,NUP98,NUP214,PSME3,OS9,SLC40A1,RNF185,NUP58,SLC24A4,SLC12A6,UBC,SLC7A7,HK1,ABCA1,VCP,PSMB8,PSMB3
REACTOME_HDACS_DEACETYLATE_HISTONES	10/1792	94/13198	0.83811	0.981834	0.607542	10	ARID4A,ARID4B,RCOR1,TBL1X,CHD4,SUDS3,PHF21A,NCOR1,GATAD2B,TBL1XR1
WP_JOUBERT_SYNDROME	8/1792	77/13198	0.838134	0.981834	0.607542	8	RHOA,NIN,RP2,B9D2,RAB3IP,PDE6D,RAB8A,MYO5A
KEGG_NITROGEN_METABOLISM	2/1792	23/13198	0.839394	0.981834	0.607542	2	HAL,GLUL
REACTOME_INCRETIN_SYNTHESIS_SECRETION_AND_INACTIVATION	2/1792	23/13198	0.839394	0.981834	0.607542	2	SEC11A,CTNNB1
REACTOME_LONG_TERM_POTENTIATION	2/1792	23/13198	0.839394	0.981834	0.607542	2	NRGN,NRG1
REACTOME_PI_3K_CASCADE_FGFR2	2/1792	23/13198	0.839394	0.981834	0.607542	2	GAB1,GRB2
REACTOME_FCERI_MEDIATED_CA_2_MOBILIZATION	9/1792	86/13198	0.842708	0.985185	0.609616	9	BTK,LCP2,PPP3CA,VAV1,FCER1G,SYK,GRB2,PLCG2,LYN
KEGG_PROPANOATE_METABOLISM	3/1792	33/13198	0.844621	0.985185	0.609616	3	ALDH2,LDHA,ABAT
REACTOME_FORMATION_OF_THE_EARLY_ELONGATION_COMPLEX	3/1792	33/13198	0.844621	0.985185	0.609616	3	POLR2J,POLR2C,SUPT4H1
REACTOME_FCGR_ACTIVATION	7/1792	69/13198	0.844802	0.985185	0.609616	7	FGR,HCK,FCGR2A,FCGR1A,SYK,FCGR3A,LYN
REACTOME_TRANSCRIPTION_COUPLED_NUCLEOTIDE_EXCISION_REPAIR_TC_NER_	8/1792	78/13198	0.84831	0.985185	0.609616	8	POLR2J,POLD3,EP300,POLR2C,ELL,COPS5,UBC,ISY1
BIOCARTA_IL5_PATHWAY	1/1792	13/13198	0.850127	0.985185	0.609616	1	IL1B
BIOCARTA_RB_PATHWAY	1/1792	13/13198	0.850127	0.985185	0.609616	1	YWHAH
REACTOME_ERYTHROCYTES_TAKE_UP_CARBON_DIOXIDE_AND_RELEASE_OXYGEN	1/1792	13/13198	0.850127	0.985185	0.609616	1	CYB5R4
REACTOME_FGFR3_LIGAND_BINDING_AND_ACTIVATION	1/1792	13/13198	0.850127	0.985185	0.609616	1	GALNT3
REACTOME_SYNTHESIS_SECRETION_AND_INACTIVATION_OF_GLUCOSE_DEPENDENT_INSULINOTROPIC_POLYPEPTIDE_GIP_	1/1792	13/13198	0.850127	0.985185	0.609616	1	SEC11A
REACTOME_THE_ACTIVATION_OF_ARYLSULFATASES	1/1792	13/13198	0.850127	0.985185	0.609616	1	ARSB
SA_REG_CASCADE_OF_CYCLIN_EXPR	1/1792	13/13198	0.850127	0.985185	0.609616	1	CDKN1B
WP_BMP2WNT4FOXO1_PATHWAY_IN_HUMAN_PRIMARY_ENDOMETRIAL_STROMAL_CELL_DIFFERENTIATION	1/1792	13/13198	0.850127	0.985185	0.609616	1	CTNNB1
WP_DISORDERS_OF_FOLATE_METABOLISM_AND_TRANSPORT	1/1792	13/13198	0.850127	0.985185	0.609616	1	MTHFS
WP_GANGLIO_SPHINGOLIPID_METABOLISM	1/1792	13/13198	0.850127	0.985185	0.609616	1	ST3GAL2
WP_HOMOLOGOUS_RECOMBINATION	1/1792	13/13198	0.850127	0.985185	0.609616	1	POLD3
WP_PURINE_METABOLISM	1/1792	13/13198	0.850127	0.985185	0.609616	1	IMPDH1
WP_VALPROIC_ACID_PATHWAY	1/1792	13/13198	0.850127	0.985185	0.609616	1	ABAT
REACTOME_S_PHASE	18/1792	162/13198	0.851072	0.985774	0.60998	18	WAPL,UBE2D1,POLD3,GSK3B,PDS5B,PSME1,STAG2,CDKN1B,STAG1,CDKN1A,MAX,PSME3,UBC,RAD21,CDC26,TFDP1,PSMB8,PSMB3
REACTOME_PROTEIN_PROTEIN_INTERACTIONS_AT_SYNAPSES	9/1792	87/13198	0.852193	0.986566	0.61047	9	HOMER3,LIN7A,PPFIA1,FLOT2,RTN3,FLOT1,EPB41,IL1RAP,SIPA1L1
REACTOME_HIV_TRANSCRIPTION_ELONGATION	4/1792	43/13198	0.853722	0.987322	0.610938	4	POLR2J,POLR2C,ELL,SUPT4H1
REACTOME_TRANSPORT_OF_MATURE_MRNAS_DERIVED_FROM_INTRONLESS_TRANSCRIPTS	4/1792	43/13198	0.853722	0.987322	0.610938	4	NUP50,NUP98,NUP214,NUP58
REACTOME_TRANSCRIPTION_OF_THE_HIV_GENOME	7/1792	70/13198	0.855177	0.988496	0.611665	7	POLR2J,CCNK,POLR2C,ELL,TAF12,GTF2B,SUPT4H1
KEGG_PROTEIN_EXPORT	2/1792	24/13198	0.856501	0.988507	0.611671	2	HSPA5,SEC11A
REACTOME_XENOBIOTICS	2/1792	24/13198	0.856501	0.988507	0.611671	2	AHR,ARNT
WP_GPCRS_CLASS_B_SECRETINLIKE	2/1792	24/13198	0.856501	0.988507	0.611671	2	ADGRE5,ADGRE2
WP_DISRUPTION_OF_POSTSYNAPTIC_SIGNALLING_BY_CNV	3/1792	34/13198	0.858961	0.990838	0.613114	3	MAPK1,FMR1,MAPK3
WP_RETINOBLASTOMA_GENE_IN_CANCER	9/1792	88/13198	0.861219	0.992934	0.614411	9	POLD3,CDKN1B,E2F3,CDKN1A,RAF1,MDM2,HMGB2,TFDP1,PRKDC
WP_CARDIAC_PROGENITOR_DIFFERENTIATION	5/1792	53/13198	0.863701	0.995287	0.615867	5	GSK3B,TGFB1,MAPK14,NRG1,SIRPA
REACTOME_ROLE_OF_LAT2_NTAL_LAB_ON_CALCIUM_MOBILIZATION	7/1792	71/13198	0.86498	0.996252	0.616464	7	GAB2,PIK3CB,LAT2,FCER1G,SYK,GRB2,LYN
BIOCARTA_PRC2_PATHWAY	1/1792	14/13198	0.870496	0.996336	0.616516	1	YY1
BIOCARTA_TCRA_PATHWAY	1/1792	14/13198	0.870496	0.996336	0.616516	1	PTPRC
REACTOME_DEGRADATION_OF_CYSTEINE_AND_HOMOCYSTEINE	1/1792	14/13198	0.870496	0.996336	0.616516	1	MPST
REACTOME_HEME_DEGRADATION	1/1792	14/13198	0.870496	0.996336	0.616516	1	HMOX1
REACTOME_POLYMERASE_SWITCHING	1/1792	14/13198	0.870496	0.996336	0.616516	1	POLD3
REACTOME_RESPONSE_TO_METAL_IONS	1/1792	14/13198	0.870496	0.996336	0.616516	1	MTF1
REACTOME_SYNTHESIS_OF_IP2_IP_AND_INS_IN_THE_CYTOSOL	1/1792	14/13198	0.870496	0.996336	0.616516	1	SYNJ1
REACTOME_TRYPTOPHAN_CATABOLISM	1/1792	14/13198	0.870496	0.996336	0.616516	1	KYNU
WP_OSTEOBLAST_SIGNALING	1/1792	14/13198	0.870496	0.996336	0.616516	1	ITGB3
REACTOME_CHOLESTEROL_BIOSYNTHESIS	2/1792	25/13198	0.871927	0.996336	0.616516	2	HMGCR,LBR
REACTOME_CYCLIN_A_B1_B2_ASSOCIATED_EVENTS_DURING_G2_M_TRANSITION	2/1792	25/13198	0.871927	0.996336	0.616516	2	PPP2CA,PPP2R2A
REACTOME_FRS_MEDIATED_FGFR2_SIGNALING	2/1792	25/13198	0.871927	0.996336	0.616516	2	KRAS,GRB2
REACTOME_GAP_FILLING_DNA_REPAIR_SYNTHESIS_AND_LIGATION_IN_GG_NER	2/1792	25/13198	0.871927	0.996336	0.616516	2	POLD3,UBC
REACTOME_PHASE_2_PLATEAU_PHASE	2/1792	25/13198	0.871927	0.996336	0.616516	2	KCNE3,KCNE1
REACTOME_RESOLUTION_OF_AP_SITES_VIA_THE_MULTIPLE_NUCLEOTIDE_PATCH_REPLACEMENT_PATHWAY	2/1792	25/13198	0.871927	0.996336	0.616516	2	POLB,POLD3
KEGG_BASAL_TRANSCRIPTION_FACTORS	3/1792	35/13198	0.872126	0.996336	0.616516	3	TAF12,GTF2B,GTF2I
KEGG_PYRIMIDINE_METABOLISM	10/1792	98/13198	0.872795	0.996596	0.616677	10	POLR2J,RRM2B,NT5C2,POLD3,POLR2C,ENTPD1,CDA,CANT1,DPYD,ENTPD4
REACTOME_SNRNP_ASSEMBLY	5/1792	54/13198	0.8743	0.997712	0.617367	5	NUP50,PRMT5,NUP98,NUP214,NUP58
REACTOME_MITOTIC_G1_PHASE_AND_G1_S_TRANSITION	16/1792	149/13198	0.874658	0.997712	0.617367	16	PSME1,CDKN1B,E2F3,PPP2CA,CDKN1A,MAX,CDKN2D,CDKN1C,PSME3,UBC,DYRK1A,TFDP1,PSMB8,PPP2R2A,LYN,PSMB3
REACTOME_ASYMMETRIC_LOCALIZATION_OF_PCP_PROTEINS	6/1792	64/13198	0.882853	1	0.618783	6	PSME1,PARD6A,PSME3,UBC,PSMB8,PSMB3
REACTOME_REGULATION_OF_RUNX2_EXPRESSION_AND_ACTIVITY	7/1792	73/13198	0.882954	1	0.618783	7	GSK3B,PSME1,NR3C1,PSME3,UBC,PSMB8,PSMB3
REACTOME_DEGRADATION_OF_AXIN	5/1792	55/13198	0.884191	1	0.618783	5	PSME1,PSME3,UBC,PSMB8,PSMB3
REACTOME_METABOLIC_DISORDERS_OF_BIOLOGICAL_OXIDATION_ENZYMES	3/1792	36/13198	0.884191	1	0.618783	3	TBXAS1,CYP27A1,OPLAH
REACTOME_N_GLYCAN_ANTENNAE_ELONGATION_IN_THE_MEDIAL_TRANS_GOLGI	2/1792	26/13198	0.885812	1	0.618783	2	ST3GAL4,B4GALT5
REACTOME_WNT_LIGAND_BIOGENESIS_AND_TRAFFICKING	2/1792	26/13198	0.885812	1	0.618783	2	VPS35,WLS
KEGG_PROTEASOME	4/1792	46/13198	0.88781	1	0.618783	4	PSME1,PSME3,PSMB8,PSMB3
BIOCARTA_ERYTH_PATHWAY	1/1792	15/13198	0.888099	1	0.618783	1	TGFB1
BIOCARTA_NO2IL12_PATHWAY	1/1792	15/13198	0.888099	1	0.618783	1	IL12RB2
KEGG_TERPENOID_BACKBONE_BIOSYNTHESIS	1/1792	15/13198	0.888099	1	0.618783	1	HMGCR
REACTOME_FATTY_ACIDS	1/1792	15/13198	0.888099	1	0.618783	1	CYP4F3
REACTOME_MISMATCH_REPAIR	1/1792	15/13198	0.888099	1	0.618783	1	POLD3
REACTOME_NEGATIVE_REGULATION_OF_TCF_DEPENDENT_SIGNALING_BY_WNT_LIGAND_ANTAGONISTS	1/1792	15/13198	0.888099	1	0.618783	1	KREMEN1
REACTOME_NUCLEOBASE_BIOSYNTHESIS	1/1792	15/13198	0.888099	1	0.618783	1	IMPDH1
REACTOME_PROCESSIVE_SYNTHESIS_ON_THE_LAGGING_STRAND	1/1792	15/13198	0.888099	1	0.618783	1	POLD3
REACTOME_PROLACTIN_RECEPTOR_SIGNALING	1/1792	15/13198	0.888099	1	0.618783	1	STAT5B
WP_15Q112_COPY_NUMBER_VARIATION_SYNDROME	1/1792	15/13198	0.888099	1	0.618783	1	FMR1
WP_CHOLESTEROL_BIOSYNTHESIS_PATHWAY	1/1792	15/13198	0.888099	1	0.618783	1	HMGCR
WP_CODEINE_AND_MORPHINE_METABOLISM	1/1792	15/13198	0.888099	1	0.618783	1	ABCC3
WP_COVID19_ADVERSE_OUTCOME_PATHWAY	1/1792	15/13198	0.888099	1	0.618783	1	IL1B
WP_CYSTEINE_AND_METHIONINE_CATABOLISM	1/1792	15/13198	0.888099	1	0.618783	1	MPST
WP_LET7_INHIBITION_OF_ES_CELL_REPROGRAMMING	1/1792	15/13198	0.888099	1	0.618783	1	KLF4
WP_MAJOR_RECEPTORS_TARGETED_BY_EPINEPHRINE_AND_NOREPINEPHRINE	1/1792	15/13198	0.888099	1	0.618783	1	ADCY4
[truncated: 255 more rows]

## Sheet: fisher_CP_dn
ID	GeneRatio	BgRatio	pvalue	p.adjust	qvalue	Count	geneID
REACTOME_RRNA_PROCESSING	55/901	205/13198	3.18499e-19	5.60876e-16	5.57205e-16	55	ELAC2,WDR3,WDR18,EXOSC5,RPS5,NOP14,PES1,NOP56,RPS16,RPS19,NOP2,BYSL,RRP9,RPS15,WDR75,PNO1,HEATR1,EXOSC8,UTP20,MTERF4,MRM2,EXOSC9,RIOK1,RPL36,DKC1,WDR36,NAT10,IMP4,TEX10,WDR12,UTP4,NOB1,PELP1,NHP2,DHX37,RRP1,NOL9,WDR43,RPL39L,DCAF13,NOL6,RPL13,TSR1,MRM3,RPLP2,IMP3,TBL3,NOC4L,RRP7A,RPL10A,DDX47,EXOSC6,RPS28,BOP1,MRM1
REACTOME_RRNA_MODIFICATION_IN_THE_NUCLEUS_AND_CYTOSOL	24/901	60/13198	2.63814e-13	2.32288e-10	2.30768e-10	24	WDR3,NOP14,NOP56,NOP2,RRP9,WDR75,PNO1,HEATR1,UTP20,DKC1,WDR36,NAT10,IMP4,UTP4,NHP2,DHX37,WDR43,DCAF13,NOL6,IMP3,TBL3,NOC4L,RRP7A,DDX47
REACTOME_TRANSLATION	42/901	295/13198	4.30631e-06	0.00252781	0.00251126	42	RPS5,MTIF2,SARS2,RPS16,MRPL4,RPS19,EIF3B,AIMP2,EIF2B1,MRPL3,RPS15,FARSB,MRPS14,MRPS2,TSFM,AARS2,MRPS26,MRPS12,RPL36,EIF3G,ERAL1,VARS2,PPA2,TARS2,SRPRB,EIF2B5,MRPL55,RPL39L,RPL13,MRPL57,RPLP2,GADD45GIP1,MRPL41,MRPL54,GSPT2,RPL10A,MRPL38,MRPS18B,RPS28,MARS2,MRPL12,MRPL45
REACTOME_MITOCHONDRIAL_PROTEIN_IMPORT	15/901	65/13198	2.38515e-05	0.00941314	0.00935153	15	TIMM13,TIMM44,PITRM1,SLC25A12,GFER,TOMM40,TIMM10,TIMM8B,TOMM70,FXN,PMPCA,CHCHD7,CYC1,COA4,CHCHD10
REACTOME_NUCLEOBASE_BIOSYNTHESIS	7/901	15/13198	2.67267e-05	0.00941314	0.00935153	7	CAD,DHODH,LHPP,PAICS,PPAT,ATIC,PFAS
KEGG_STEROID_BIOSYNTHESIS	7/901	17/13198	7.15528e-05	0.0188627	0.0187392	7	MSMO1,SQLE,LIPA,DHCR24,EBP,NSDHL,LSS
REACTOME_MITOCHONDRIAL_TRANSLATION	18/901	96/13198	7.49795e-05	0.0188627	0.0187392	18	MTIF2,MRPL4,MRPL3,MRPS14,MRPS2,TSFM,MRPS26,MRPS12,ERAL1,MRPL55,MRPL57,GADD45GIP1,MRPL41,MRPL54,MRPL38,MRPS18B,MRPL12,MRPL45
REACTOME_TRNA_PROCESSING	19/901	111/13198	0.000170357	0.0339928	0.0337703	19	ELAC2,NSUN2,FTSJ1,NUP37,NUP188,TRMU,NUP107,GTPBP3,ALKBH8,TSEN2,CPSF4,TRMT61A,URM1,POP5,PUS1,TSEN54,ADAT2,TSEN15,QTRT1
REACTOME_CHOLESTEROL_BIOSYNTHESIS	8/901	25/13198	0.000173728	0.0339928	0.0337703	8	MSMO1,SQLE,MVK,DHCR24,EBP,NSDHL,LSS,PLPP6
REACTOME_PROTEIN_LOCALIZATION	24/901	164/13198	0.0003134	0.0520263	0.0516858	24	TIMM13,TIMM44,PITRM1,SLC25A12,ABCD3,ACOT2,EPHX2,PEX16,GFER,TOMM40,HACL1,TIMM10,PEX14,TIMM8B,TOMM70,TYSND1,PEX10,FXN,PMPCA,CHCHD7,CYC1,COA4,DECR2,CHCHD10
WP_FLUOROPYRIMIDINE_ACTIVITY	9/901	34/13198	0.000342795	0.0520263	0.0516858	9	ERCC2,XRCC3,PPAT,FPGS,TP53,UCK2,TK1,MTHFR,DHFR
REACTOME_METABOLISM_OF_NUCLEOTIDES	17/901	99/13198	0.000354523	0.0520263	0.0516858	17	CAD,DHODH,NME3,LHPP,DNPH1,NT5C,ITPA,PAICS,PPAT,NT5E,ATIC,UCK2,TK1,ADAL,PFAS,DCTPP1,APRT
WP_PURINE_METABOLISM_AND_RELATED_DISORDERS	7/901	22/13198	0.000463958	0.0628484	0.0624371	7	ITPA,PAICS,PPAT,ATIC,MAT2A,PFAS,APRT
REACTOME_DNA_REPAIR	39/901	331/13198	0.000583345	0.0718873	0.0714168	39	ERCC1,TIPIN,APEX1,MPG,ERCC2,LIG1,POLD2,PRPF19,GTF2H3,RAD1,INO80B,FANCL,XRCC3,SLX1A,MUTYH,DDB2,MDC1,CUL4A,NEIL1,FANCI,TP53,RAD17,NEIL2,FAAP20,ERCC3,ATRIP,ALKBH3,APBB1,FEN1,GPS1,MGMT,RAD23A,FANCF,SUMO3,RAD51D,MCRS1,ALKBH2,BLM,RTEL1
REACTOME_DISEASES_ASSOCIATED_WITH_N_GLYCOSYLATION_OF_PROTEINS	6/901	17/13198	0.000640892	0.0718873	0.0714168	6	ALG9,MOGS,ALG8,ALG14,MAN1B1,ALG3
WP_PYRIMIDINE_METABOLISM	15/901	86/13198	0.00065315	0.0718873	0.0714168	15	POLR3E,POLR1A,CAD,POLR3H,DHODH,NME3,TWISTNB,POLD2,NT5C,POLR1B,UCK2,POLR3A,TK1,POLR1C,DCTPP1
REACTOME_PURINE_RIBONUCLEOSIDE_MONOPHOSPHATE_BIOSYNTHESIS	5/901	12/13198	0.000774669	0.0757884	0.0752924	5	LHPP,PAICS,PPAT,ATIC,PFAS
REACTOME_RRNA_PROCESSING_IN_THE_MITOCHONDRION	5/901	12/13198	0.000774669	0.0757884	0.0752924	5	ELAC2,MTERF4,MRM2,MRM3,MRM1
KEGG_PYRIMIDINE_METABOLISM	16/901	98/13198	0.000925662	0.0857943	0.0852327	16	POLR1A,CAD,POLR3H,DHODH,NME3,POLD2,NT5C,POLR1B,ITPA,NT5E,UCK2,AK3,POLR3A,TK1,POLR1C,TXNRD2
WP_GLYCOSYLATION_AND_RELATED_CONGENITAL_DEFECTS	7/901	25/13198	0.00109197	0.0961475	0.0955182	7	ALG9,MOGS,ALG8,ALG14,GMPPB,MPI,ALG3
REACTOME_REPRESSION_OF_WNT_TARGET_GENES	5/901	14/13198	0.00174551	0.146373	0.145415	5	TCF7,MYC,LEF1,CTBP1,TLE1
KEGG_BASE_EXCISION_REPAIR	8/901	35/13198	0.00205557	0.164539	0.163462	8	APEX1,MPG,LIG1,POLD2,MUTYH,NEIL1,NEIL2,FEN1
REACTOME_MITOCHONDRIAL_TRNA_AMINOACYLATION	6/901	21/13198	0.00222022	0.16969	0.168579	6	SARS2,AARS2,VARS2,PPA2,TARS2,MARS2
WP_CHOLESTEROL_BIOSYNTHESIS_PATHWAY	5/901	15/13198	0.0024724	0.16969	0.168579	5	MSMO1,SQLE,MVK,NSDHL,LSS
KEGG_NUCLEOTIDE_EXCISION_REPAIR	9/901	44/13198	0.00250536	0.16969	0.168579	9	ERCC1,ERCC2,LIG1,POLD2,GTF2H3,DDB2,CUL4A,ERCC3,RAD23A
WP_NUCLEOTIDE_EXCISION_REPAIR	9/901	44/13198	0.00250536	0.16969	0.168579	9	ERCC1,ERCC2,LIG1,POLD2,GTF2H3,DDB2,CUL4A,ERCC3,RAD23A
PID_IL12_2PATHWAY	11/901	62/13198	0.0028857	0.188212	0.18698	11	SPHK2,TBX21,IL2RB,IFNG,FASLG,GZMA,EOMES,SOCS1,CD247,CCL4,CCL3
PID_IL2_STAT5_PATHWAY	7/901	30/13198	0.00342914	0.215669	0.214257	7	IL2RB,CDK6,CCND3,FASLG,MYC,BCL2,PRF1
REACTOME_RESOLUTION_OF_ABASIC_SITES_AP_SITES_	8/901	38/13198	0.00356186	0.216291	0.214875	8	APEX1,MPG,LIG1,POLD2,MUTYH,NEIL1,NEIL2,FEN1
REACTOME_RNA_POLYMERASE_I_TRANSCRIPTION_INITIATION	9/901	47/13198	0.00400868	0.222292	0.220837	9	POLR1A,MBD3,RRN3,ERCC2,TWISTNB,GTF2H3,POLR1B,ERCC3,POLR1C
WP_CHOLESTEROL_METABOLISM_INCLUDES_BOTH_BLOCH_AND_KANDUTSCHRUSSELL_PATHWAYS	9/901	47/13198	0.00400868	0.222292	0.220837	9	MSMO1,SQLE,MVK,DHCR24,ACOT2,EBP,NSDHL,LSS,SREBF2
REACTOME_RNA_POLYMERASE_I_TRANSCRIPTION_TERMINATION	7/901	31/13198	0.00417308	0.222292	0.220837	7	POLR1A,ERCC2,TWISTNB,GTF2H3,POLR1B,ERCC3,POLR1C
WP_BASE_EXCISION_REPAIR	7/901	31/13198	0.00417308	0.222292	0.220837	7	APEX1,MPG,LIG1,POLD2,MUTYH,NEIL2,FEN1
REACTOME_GLOBAL_GENOME_NUCLEOTIDE_EXCISION_REPAIR_GG_NER_	13/901	84/13198	0.00436247	0.222292	0.220837	13	ERCC1,ERCC2,LIG1,POLD2,GTF2H3,INO80B,DDB2,CUL4A,ERCC3,GPS1,RAD23A,SUMO3,MCRS1
BIOCARTA_ARF_PATHWAY	5/901	17/13198	0.0045443	0.222292	0.220837	5	POLR1A,POLR1B,MYC,TP53,POLR1C
REACTOME_KSRP_KHSRP_BINDS_AND_DESTABILIZES_MRNA	5/901	17/13198	0.0045443	0.222292	0.220837	5	EXOSC5,EXOSC8,EXOSC9,PARN,EXOSC6
REACTOME_GAMMA_CARBOXYLATION_HYPUSINE_FORMATION_AND_ARYLSULFATASE_ACTIVATION	8/901	42/13198	0.00675421	0.313004	0.310956	8	DPH1,DPH5,DOHH,DPH2,FN3KRP,DPH7,DNAJC24,GAS6
REACTOME_TRNA_AMINOACYLATION	8/901	42/13198	0.00675421	0.313004	0.310956	8	SARS2,AIMP2,FARSB,AARS2,VARS2,PPA2,TARS2,MARS2
WP_WNTBETACATENIN_SIGNALING_PATHWAY_IN_LEUKEMIA	6/901	26/13198	0.00703105	0.317479	0.315401	6	TCF3,ZBTB16,FLT3,MYC,LEF1,FZD6
REACTOME_FORMATION_OF_INCISION_COMPLEX_IN_GG_NER	8/901	43/13198	0.00781375	0.33561	0.333413	8	ERCC1,ERCC2,GTF2H3,DDB2,CUL4A,ERCC3,RAD23A,SUMO3
REACTOME_TRNA_MODIFICATION_IN_THE_NUCLEUS_AND_CYTOSOL	8/901	43/13198	0.00781375	0.33561	0.333413	8	NSUN2,FTSJ1,ALKBH8,TRMT61A,URM1,PUS1,ADAT2,QTRT1
KEGG_VALINE_LEUCINE_AND_ISOLEUCINE_DEGRADATION	8/901	44/13198	0.00899339	0.368901	0.366487	8	ALDH6A1,ACADS,IVD,MCCC2,ALDH1B1,ACAA2,ACADSB,BCKDHA
REACTOME_CYTOSOLIC_IRON_SULFUR_CLUSTER_ASSEMBLY	4/901	13/13198	0.00937672	0.368901	0.366487	4	CIAPIN1,NUBP2,ERCC2,RTEL1
WP_DISORDERS_OF_FOLATE_METABOLISM_AND_TRANSPORT	4/901	13/13198	0.00937672	0.368901	0.366487	4	MTR,ATIC,MTHFR,DHFR
WP_MITOCHONDRIAL_GENE_EXPRESSION	5/901	20/13198	0.00959977	0.368901	0.366487	5	POLRMT,PPRC1,PPARGC1B,MTERF3,TFB2M
REACTOME_DISEASES_OF_METABOLISM	27/901	246/13198	0.00982125	0.368901	0.366487	27	GCLC,POMGNT1,ALG9,NAGLU,EPM2A,MOGS,MTR,GALNT12,IDUA,POMT1,MCCC2,MMAB,ADAMTS10,B3GAT3,ADAMTS1,ALG8,HLCS,SPON2,CD320,CHST14,ALG14,B3GALT6,MAN1B1,MPI,NHLRC1,ALG3,ACY1
REACTOME_DISEASES_OF_MITOTIC_CELL_CYCLE	7/901	36/13198	0.00984575	0.368901	0.366487	7	CDC23,CDK6,CCND3,TFDP2,CDC16,CDK4,ANAPC2
REACTOME_RNA_POLYMERASE_III_TRANSCRIPTION_INITIATION_FROM_TYPE_1_PROMOTER	6/901	28/13198	0.0102417	0.370204	0.367781	6	POLR3E,POLR3H,GTF3C2,POLR3A,POLR1C,BRF1
WP_INTEGRATED_CANCER_PATHWAY	8/901	45/13198	0.010301	0.370204	0.367781	8	CDC25B,CDK4,MYC,TP53,SMAD3,BCL2,NOXA1,BLM
REACTOME_TRANSCRIPTIONAL_ACTIVATION_OF_MITOCHONDRIAL_BIOGENESIS	9/901	55/13198	0.0114994	0.40501	0.402359	9	POLRMT,TWNK,NR1D1,TGS1,SIRT3,PPRC1,PPARGC1B,TFB2M,IDH2
REACTOME_BRANCHED_CHAIN_AMINO_ACID_CATABOLISM	5/901	21/13198	0.0119059	0.411103	0.408412	5	ALDH6A1,IVD,MCCC2,ACADSB,BCKDHA
PID_FANCONI_PATHWAY	8/901	47/13198	0.0133311	0.451462	0.448507	8	RAD1,FANCL,XRCC3,FANCI,RAD17,ATRIP,FANCF,BLM
KEGG_GLYCOSAMINOGLYCAN_BIOSYNTHESIS_CHONDROITIN_SULFATE	5/901	22/13198	0.0145609	0.474847	0.471739	5	B3GAT1,CHST12,B3GAT3,CHST14,B3GALT6
REACTOME_DEFECTS_IN_VITAMIN_AND_COFACTOR_METABOLISM	5/901	22/13198	0.0145609	0.474847	0.471739	5	MTR,MCCC2,MMAB,HLCS,CD320
REACTOME_FANCONI_ANEMIA_PATHWAY	7/901	39/13198	0.0151969	0.486576	0.483391	7	ERCC1,FANCL,SLX1A,FANCI,FAAP20,ATRIP,FANCF
REACTOME_CHEMOKINE_RECEPTORS_BIND_CHEMOKINES	9/901	58/13198	0.0160633	0.505135	0.501828	9	CCR7,XCL1,XCL2,ACKR3,CCL28,CX3CR1,CXCR3,CCL4,CCL3
REACTOME_NUCLEOTIDE_EXCISION_REPAIR	14/901	110/13198	0.0174051	0.537727	0.534208	14	ERCC1,ERCC2,LIG1,POLD2,PRPF19,GTF2H3,INO80B,DDB2,CUL4A,ERCC3,GPS1,RAD23A,SUMO3,MCRS1
REACTOME_TRNA_PROCESSING_IN_THE_NUCLEUS	9/901	59/13198	0.0178446	0.540499	0.536961	9	ELAC2,NUP37,NUP188,NUP107,TSEN2,CPSF4,POP5,TSEN54,TSEN15
WP_DNA_DAMAGE_RESPONSE	10/901	69/13198	0.0181087	0.540499	0.536961	10	SESN1,CDK6,CCND3,RAD1,DDB2,CDK4,MYC,TP53,RAD17,ATRIP
WP_DEVELOPMENT_AND_HETEROGENEITY_OF_THE_ILC_FAMILY	6/901	32/13198	0.0195437	0.560893	0.557221	6	TBX21,ZBTB16,IFNG,ID2,BCL11B,EOMES
KEGG_GRAFT_VERSUS_HOST_DISEASE	7/901	41/13198	0.0197475	0.560893	0.557221	7	IFNG,FASLG,KLRD1,KLRC1,PRF1,HLA-DOA,KIR2DL3
REACTOME_DUAL_INCISION_IN_GG_NER	7/901	41/13198	0.0197475	0.560893	0.557221	7	ERCC1,ERCC2,POLD2,GTF2H3,DDB2,CUL4A,ERCC3
REACTOME_MRNA_DECAY_BY_3_TO_5_EXORIBONUCLEASE	4/901	16/13198	0.0202677	0.566531	0.562823	4	EXOSC5,EXOSC8,EXOSC9,EXOSC6
REACTOME_EXTENSION_OF_TELOMERES	8/901	51/13198	0.0212627	0.585056	0.581227	8	LIG1,POLD2,DKC1,PIF1,NHP2,FEN1,BLM,RTEL1
WP_EUKARYOTIC_TRANSCRIPTION_INITIATION	7/901	42/13198	0.0223462	0.605409	0.601446	7	POLR3E,POLR1A,POLR3H,ERCC2,GTF2H3,POLR1B,ERCC3
KEGG_ONE_CARBON_POOL_BY_FOLATE	4/901	17/13198	0.0251057	0.640741	0.636547	4	MTR,ATIC,MTHFR,DHFR
REACTOME_ABERRANT_REGULATION_OF_MITOTIC_G1_S_TRANSITION_IN_CANCER_DUE_TO_RB1_DEFECTS	4/901	17/13198	0.0251057	0.640741	0.636547	4	CDK6,CCND3,TFDP2,CDK4
REACTOME_BUTYRATE_RESPONSE_FACTOR_1_BRF1_BINDS_AND_DESTABILIZES_MRNA	4/901	17/13198	0.0251057	0.640741	0.636547	4	EXOSC5,EXOSC8,EXOSC9,EXOSC6
REACTOME_TRISTETRAPROLIN_TTP_ZFP36_BINDS_AND_DESTABILIZES_MRNA	4/901	17/13198	0.0251057	0.640741	0.636547	4	EXOSC5,EXOSC8,EXOSC9,EXOSC6
BIOCARTA_SET_PATHWAY	3/901	10/13198	0.0264835	0.656865	0.652566	3	APEX1,GZMA,PRF1
ST_INTERFERON_GAMMA_PATHWAY	3/901	10/13198	0.0264835	0.656865	0.652566	3	IFNG,CISH,ELP2
BIOCARTA_NKT_PATHWAY	5/901	26/13198	0.0290472	0.700714	0.696128	5	IFNG,CCR7,CXCR3,CCL4,CCL3
KEGG_GLYCOSAMINOGLYCAN_BIOSYNTHESIS_HEPARAN_SULFATE	5/901	26/13198	0.0290472	0.700714	0.696128	5	HS3ST1,B3GAT1,HS3ST3B1,B3GAT3,B3GALT6
REACTOME_PURINE_CATABOLISM	4/901	18/13198	0.0305806	0.718033	0.713333	4	DNPH1,NT5C,ITPA,NT5E
REACTOME_RNA_POLYMERASE_III_CHAIN_ELONGATION	4/901	18/13198	0.0305806	0.718033	0.713333	4	POLR3E,POLR3H,POLR3A,POLR1C
KEGG_DNA_REPLICATION	6/901	36/13198	0.0333802	0.768466	0.763436	6	MCM2,RNASEH2A,LIG1,POLD2,MCM3,FEN1
REACTOME_ATF4_ACTIVATES_GENES_IN_RESPONSE_TO_ENDOPLASMIC_RETICULUM_STRESS	5/901	27/13198	0.0337105	0.768466	0.763436	5	EXOSC5,EXOSC8,EXOSC9,PARN,EXOSC6
REACTOME_EUKARYOTIC_TRANSLATION_INITIATION	14/901	120/13198	0.0340377	0.768466	0.763436	14	RPS5,RPS16,RPS19,EIF3B,EIF2B1,RPS15,RPL36,EIF3G,EIF2B5,RPL39L,RPL13,RPLP2,RPL10A,RPS28
REACTOME_DISEASES_OF_GLYCOSYLATION	16/901	143/13198	0.0346294	0.771929	0.766877	16	POMGNT1,ALG9,MOGS,GALNT12,POMT1,ADAMTS10,B3GAT3,ADAMTS1,ALG8,SPON2,CHST14,ALG14,B3GALT6,MAN1B1,MPI,ALG3
KEGG_N_GLYCAN_BIOSYNTHESIS	7/901	46/13198	0.0350883	0.77238	0.767325	7	ALG9,MOGS,ALG8,DOLPP1,ALG14,MAN1B1,ALG3
REACTOME_PROCESSIVE_SYNTHESIS_ON_THE_C_STRAND_OF_THE_TELOMERE	4/901	19/13198	0.0367034	0.77669	0.771606	4	LIG1,POLD2,FEN1,BLM
WP_PROTEOGLYCAN_BIOSYNTHESIS	4/901	19/13198	0.0367034	0.77669	0.771606	4	B3GAT3,SLC35B2,CHST14,B3GALT6
REACTOME_IMMUNOREGULATORY_INTERACTIONS_BETWEEN_A_LYMPHOID_AND_A_NON_LYMPHOID_CELL	20/901	191/13198	0.036953	0.77669	0.771606	20	CD22,SLAMF7,CD200,SIGLEC8,CRTAM,CD81,CD160,KLRD1,KLRC1,ITGB7,KLRF1,SLAMF6,LAIR1,LAIR2,SH2D1B,CD247,NCR3,KLRK1,LILRA4,KIR2DL3
REACTOME_HDR_THROUGH_HOMOLOGOUS_RECOMBINATION_HRR_	9/901	67/13198	0.0375571	0.77669	0.771606	9	POLD2,RAD1,XRCC3,SLX1A,RAD17,ATRIP,RAD51D,BLM,RTEL1
REACTOME_MITOCHONDRIAL_FATTY_ACID_BETA_OXIDATION	6/901	37/13198	0.0376255	0.77669	0.771606	6	MECR,ACOT2,ACADS,ACOT11,ACAA2,ACAD11
WP_CELL_CYCLE	14/901	122/13198	0.0384114	0.77669	0.771606	14	MAD1L1,MCM2,CDC23,CDC25B,CDK6,MCM3,CCND3,TFDP2,CDC16,CDK4,MYC,TP53,SMAD3,ANAPC2
BIOCARTA_G1_PATHWAY	5/901	28/13198	0.0388124	0.77669	0.771606	5	CDK6,CDK4,TP53,SMAD3,DHFR
KEGG_HOMOLOGOUS_RECOMBINATION	5/901	28/13198	0.0388124	0.77669	0.771606	5	POLD2,XRCC3,RAD51D,RAD54B,BLM
REACTOME_DNA_DAMAGE_RECOGNITION_IN_GG_NER	6/901	38/13198	0.0422003	0.813723	0.808397	6	INO80B,DDB2,CUL4A,GPS1,RAD23A,MCRS1
REACTOME_GENE_AND_PROTEIN_EXPRESSION_BY_JAK_STAT_SIGNALING_AFTER_INTERLEUKIN_12_STIMULATION	6/901	38/13198	0.0422003	0.813723	0.808397	6	IFNG,SNRPA1,HNRNPDL,BOLA2B,BOLA2,MIF
KEGG_ARACHIDONIC_ACID_METABOLISM	8/901	58/13198	0.0422741	0.813723	0.808397	8	PTGDS,GPX7,EPHX2,GGT7,PTGES2,ALOX15,AKR1C3,LTC4S
BIOCARTA_NKCELLS_PATHWAY	4/901	20/13198	0.0434793	0.813723	0.808397	4	KLRD1,KLRC1,KLRC3,LAT
WP_TP53_NETWORK	4/901	20/13198	0.0434793	0.813723	0.808397	4	MYC,TP53,BCL2,BOK
KEGG_PURINE_METABOLISM	17/901	159/13198	0.0436527	0.813723	0.808397	17	POLR1A,POLR3H,NME3,POLD2,NT5C,POLR1B,ITPA,PAICS,PPAT,PDE6B,NT5E,ATIC,POLR3A,POLR1C,PFAS,FHIT,APRT
KEGG_RNA_POLYMERASE	5/901	29/13198	0.0443597	0.813723	0.808397	5	POLR1A,POLR3H,POLR1B,POLR3A,POLR1C
WP_SELECTIVE_EXPRESSION_OF_CHEMOKINE_RECEPTORS_DURING_TCELL_POLARIZATION	5/901	29/13198	0.0443597	0.813723	0.808397	5	IFNG,CCR7,CXCR3,CCL4,CCL3
KEGG_CELL_CYCLE	14/901	125/13198	0.0457028	0.829717	0.824287	14	MAD1L1,MCM2,CDC23,CDC25B,CDK6,MCM3,CCND3,TFDP2,CDC16,CDK4,MYC,TP53,SMAD3,ANAPC2
PID_ATR_PATHWAY	6/901	39/13198	0.04711	0.846538	0.840997	6	MCM2,TIPIN,PPP2R1A,RAD1,RAD17,ATRIP
WP_LNCRNA_INVOLVEMENT_IN_CANONICAL_WNT_SIGNALING_AND_COLORECTAL_CANCER	12/901	103/13198	0.0477573	0.849501	0.843941	12	DVL2,TCF3,TCF7,CDK6,CCND3,SFRP5,SERPINF1,MYC,LEF1,WNT7A,CTBP1,FZD6
REACTOME_INTERLEUKIN_37_SIGNALING	4/901	21/13198	0.0509083	0.883682	0.877898	4	PTPN4,IL18BP,SMAD3,SIGIRR
REACTOME_PCNA_DEPENDENT_LONG_PATCH_BASE_EXCISION_REPAIR	4/901	21/13198	0.0509083	0.883682	0.877898	4	APEX1,LIG1,POLD2,FEN1
REACTOME_NONSENSE_MEDIATED_DECAY_NMD_	13/901	116/13198	0.0526111	0.883682	0.877898	13	RPS5,RPS16,RPS19,PPP2R1A,RPS15,RPL36,RPL39L,RPL13,UPF3A,RPLP2,GSPT2,RPL10A,RPS28
BIOCARTA_CTL_PATHWAY	3/901	13/13198	0.0541952	0.883682	0.877898	3	FASLG,PRF1,CD247
BIOCARTA_RB_PATHWAY	3/901	13/13198	0.0541952	0.883682	0.877898	3	CDC25B,CDK4,TP53
KEGG_CIRCADIAN_RHYTHM_MAMMAL	3/901	13/13198	0.0541952	0.883682	0.877898	3	PER3,CRY2,NR1D1
WP_DEVELOPMENT_OF_PULMONARY_DENDRITIC_CELLS_AND_MACROPHAGE_SUBSETS	3/901	13/13198	0.0541952	0.883682	0.877898	3	FLT3LG,ID2,IRF8
WP_PURINE_METABOLISM	3/901	13/13198	0.0541952	0.883682	0.877898	3	ITPA,ATIC,APRT
WP_VITAMIN_B12_DISORDERS	3/901	13/13198	0.0541952	0.883682	0.877898	3	MTR,MMAB,CD320
WP_WNT_SIGNALING_PATHWAY_AND_PLURIPOTENCY	12/901	106/13198	0.0572412	0.894204	0.888352	12	DVL2,PRKCH,TCF7,PPP2R1A,CCND3,MYC,LEF1,TP53,WNT7A,PPM1J,CTBP1,FZD6
KEGG_AMINOACYL_TRNA_BIOSYNTHESIS	6/901	41/13198	0.0579492	0.894204	0.888352	6	SARS2,FARSB,AARS2,VARS2,TARS2,MARS2
REACTOME_RNA_POLYMERASE_III_TRANSCRIPTION	6/901	41/13198	0.0579492	0.894204	0.888352	6	POLR3E,POLR3H,GTF3C2,POLR3A,POLR1C,BRF1
REACTOME_FATTY_ACID_METABOLISM	18/901	177/13198	0.0581525	0.894204	0.888352	18	SLC25A1,PTGDS,MECR,ACOT2,EPHX2,ACADS,HACL1,MORC2,PTGES2,ALOX15,ACOT11,ACAA2,ELOVL6,AKR1C3,HSD17B8,LTC4S,ACAD11,DECR2
REACTOME_TP53_REGULATES_TRANSCRIPTION_OF_DNA_REPAIR_GENES	8/901	62/13198	0.0589361	0.894204	0.888352	8	ERCC2,GTF2H3,DDB2,MDC1,FANCI,TP53,ERCC3,RAD51D
BIOCARTA_ATRBRCA_PATHWAY	4/901	22/13198	0.0589855	0.894204	0.888352	4	RAD1,TP53,RAD17,FANCF
WP_METHIONINE_DE_NOVO_AND_SALVAGE_PATHWAY	4/901	22/13198	0.0589855	0.894204	0.888352	4	MRI1,SRM,MTR,MAT2A
WP_REGULATION_OF_APOPTOSIS_BY_PARATHYROID_HORMONERELATED_PROTEIN	4/901	22/13198	0.0589855	0.894204	0.888352	4	ITGA6,MYC,BCL2,BOK
PID_CMYB_PATHWAY	10/901	84/13198	0.0594105	0.894204	0.888352	10	MAD1L1,TAB1,CDK6,MYB,MYC,LEF1,MAT2A,BCL2,ZFPM1,PAX5
PID_MYC_REPRESS_PATHWAY	8/901	63/13198	0.0636659	0.907242	0.901304	8	ITGA6,PDGFRB,ID2,MYC,IRF8,ERBB2,SMAD3,BCL2
PID_WNT_NONCANONICAL_PATHWAY	5/901	32/13198	0.0637059	0.907242	0.901304	5	DVL2,TAB1,NFATC2,FZD6,YES1
REACTOME_DNA_STRAND_ELONGATION	5/901	32/13198	0.0637059	0.907242	0.901304	5	MCM2,LIG1,POLD2,MCM3,FEN1
REACTOME_PERK_REGULATES_GENE_EXPRESSION	5/901	32/13198	0.0637059	0.907242	0.901304	5	EXOSC5,EXOSC8,EXOSC9,PARN,EXOSC6
WP_TRANSSULFURATION_AND_ONE_CARBON_METABOLISM	5/901	32/13198	0.0637059	0.907242	0.901304	5	GCLC,MTR,MAT2A,MTHFR,DHFR
REACTOME_ACTIVATION_OF_GENE_EXPRESSION_BY_SREBF_SREBP_	6/901	42/13198	0.0638831	0.907242	0.901304	6	SQLE,MVK,TGS1,LSS,ELOVL6,SREBF2
REACTOME_HOMOLOGOUS_DNA_PAIRING_AND_STRAND_EXCHANGE	6/901	42/13198	0.0638831	0.907242	0.901304	6	RAD1,XRCC3,RAD17,ATRIP,RAD51D,BLM
REACTOME_DEFECTS_IN_COBALAMIN_B12_METABOLISM	3/901	14/13198	0.0655859	0.910092	0.904135	3	MTR,MMAB,CD320
WP_WNT_SIGNALING_PATHWAY_NETPATH	7/901	53/13198	0.0673447	0.910092	0.904135	7	DVL2,TCF3,NFATC2,CDK6,MYC,LEF1,CTBP1
REACTOME_MITOCHONDRIAL_CALCIUM_ION_TRANSPORT	4/901	23/13198	0.0677013	0.910092	0.904135	4	AKAP1,AFG3L2,PMPCA,PHB
REACTOME_NUCLEOTIDE_SALVAGE	4/901	23/13198	0.0677013	0.910092	0.904135	4	UCK2,TK1,ADAL,APRT
REACTOME_RNA_POLYMERASE_III_TRANSCRIPTION_TERMINATION	4/901	23/13198	0.0677013	0.910092	0.904135	4	POLR3E,POLR3H,POLR3A,POLR1C
REACTOME_TELOMERE_EXTENSION_BY_TELOMERASE	4/901	23/13198	0.0677013	0.910092	0.904135	4	DKC1,PIF1,NHP2,RTEL1
WP_NRF2ARE_REGULATION	4/901	23/13198	0.0677013	0.910092	0.904135	4	GCLC,AIMP2,YES1,PGAM5
WP_G1_TO_S_CELL_CYCLE_CONTROL	8/901	64/13198	0.0686251	0.915521	0.909528	8	MCM2,CDK6,MCM3,CCND3,TFDP2,CDK4,MYC,TP53
WP_GASTRIC_CANCER_NETWORK_2	5/901	33/13198	0.0710553	0.933942	0.927829	5	MYC,FANCI,TP53,PLAC8,RAD17
WP_ONE_CARBON_METABOLISM_AND_RELATED_PATHWAYS	7/901	54/13198	0.0730451	0.933942	0.927829	7	GCLC,GPX7,MTR,PEMT,MAT2A,MTHFR,PCYT2
WP_RETINOBLASTOMA_GENE_IN_CANCER	10/901	88/13198	0.0764607	0.933942	0.927829	10	HLTF,CDC25B,CDK6,MCM3,CCND3,TFDP2,CDK4,MYC,TP53,DHFR
WP_METABOLIC_REPROGRAMMING_IN_COLON_CANCER	6/901	44/13198	0.0767807	0.933942	0.927829	6	FH,SLC1A5,SLC2A1,PAICS,PPAT,IDH2
BIOCARTA_WNT_PATHWAY	4/901	24/13198	0.0770421	0.933942	0.927829	4	TAB1,MYC,CTBP1,TLE1
BIOCARTA_NO2IL12_PATHWAY	3/901	15/13198	0.0779699	0.933942	0.927829	3	IFNG,CXCR3,CD247
REACTOME_EICOSANOID_LIGAND_BINDING_RECEPTORS	3/901	15/13198	0.0779699	0.933942	0.927829	3	PTGER2,PTGDR,PTGDR2
REACTOME_PROCESSIVE_SYNTHESIS_ON_THE_LAGGING_STRAND	3/901	15/13198	0.0779699	0.933942	0.927829	3	LIG1,POLD2,FEN1
REACTOME_SYNTHESIS_OF_PROSTAGLANDINS_PG_AND_THROMBOXANES_TX_	3/901	15/13198	0.0779699	0.933942	0.927829	3	PTGDS,PTGES2,AKR1C3
WP_BIOMARKERS_FOR_PYRIMIDINE_METABOLISM_DISORDERS	3/901	15/13198	0.0779699	0.933942	0.927829	3	DHODH,NT5C,PUS1
REACTOME_RESPIRATORY_ELECTRON_TRANSPORT	11/901	100/13198	0.0785398	0.933942	0.927829	11	NDUFB7,ETFB,NDUFS7,TRAP1,LRPPRC,NDUFV1,NDUFA11,ACAD9,NDUFAF3,CYC1,NDUFS3
PID_IL2_PI3K_PATHWAY	5/901	34/13198	0.0788492	0.933942	0.927829	5	IL2RB,MYB,MYC,SMPD1,BCL2
REACTOME_RESOLUTION_OF_D_LOOP_STRUCTURES	5/901	34/13198	0.0788492	0.933942	0.927829	5	XRCC3,SLX1A,RAD51D,BLM,RTEL1
KEGG_BASAL_CELL_CARCINOMA	7/901	55/13198	0.0790218	0.933942	0.927829	7	DVL2,TCF7,LEF1,TP53,WNT7A,FZD6,PTCH1
REACTOME_AMINO_ACIDS_REGULATE_MTORC1	7/901	55/13198	0.0790218	0.933942	0.927829	7	SESN1,NPRL2,WDR24,RPTOR,MLST8,ATP6V0E2,C12orf66
REACTOME_COMPLEX_I_BIOGENESIS	7/901	55/13198	0.0790218	0.933942	0.927829	7	NDUFB7,NDUFS7,NDUFV1,NDUFA11,ACAD9,NDUFAF3,NDUFS3
REACTOME_HEPARAN_SULFATE_HEPARIN_HS_GAG_METABOLISM	7/901	55/13198	0.0790218	0.933942	0.927829	7	HS3ST1,NAGLU,B3GAT1,HS3ST3B1,IDUA,B3GAT3,B3GALT6
WNT_SIGNALING	10/901	89/13198	0.0811532	0.952738	0.946502	10	DVL2,TCF7,PPP2R1A,CCND3,MYC,LEF1,WNT7A,CTBP1,FZD6,TLE1
KEGG_PEROXISOME	9/901	78/13198	0.0833613	0.965784	0.959463	9	MVK,ABCD3,EPHX2,PEX16,HACL1,PEX14,PEX10,IDH2,DECR2
REACTOME_TRANSCRIPTION_COUPLED_NUCLEOTIDE_EXCISION_REPAIR_TC_NER_	9/901	78/13198	0.0833613	0.965784	0.959463	9	ERCC1,ERCC2,LIG1,POLD2,PRPF19,GTF2H3,CUL4A,ERCC3,GPS1
KEGG_NATURAL_KILLER_CELL_MEDIATED_CYTOTOXICITY	14/901	137/13198	0.0844129	0.97015	0.9638	14	NFATC2,IFNG,ZAP70,FASLG,KLRD1,KLRC1,PRF1,SH2D1B,CD247,NCR3,KLRC3,LAT,KLRK1,KIR2DL3
WP_CYTOPLASMIC_RIBOSOMAL_PROTEINS	10/901	90/13198	0.0860187	0.97015	0.9638	10	RPS6KA2,RPS5,RPS16,RPS19,RPS15,RPL36,RPL13,RPLP2,RPL10A,RPS28
WP_NCRNAS_INVOLVED_IN_WNT_SIGNALING_IN_HEPATOCELLULAR_CARCINOMA	10/901	90/13198	0.0860187	0.97015	0.9638	10	DVL2,TCF7,CCND3,SFRP5,SERPINF1,MYC,LEF1,WNT7A,CTBP1,FZD6
KEGG_GLYCOSYLPHOSPHATIDYLINOSITOL_GPI_ANCHOR_BIOSYNTHESIS	4/901	25/13198	0.0869905	0.97015	0.9638	4	PIGL,PIGO,GPAA1,PIGW
REACTOME_RESOLUTION_OF_AP_SITES_VIA_THE_MULTIPLE_NUCLEOTIDE_PATCH_REPLACEMENT_PATHWAY	4/901	25/13198	0.0869905	0.97015	0.9638	4	APEX1,LIG1,POLD2,FEN1
REACTOME_RESPONSE_OF_EIF2AK4_GCN2_TO_AMINO_ACID_DEFICIENCY	11/901	102/13198	0.0876081	0.97015	0.9638	11	RPS5,TRIB3,RPS16,RPS19,RPS15,RPL36,RPL39L,RPL13,RPLP2,RPL10A,RPS28
WP_DNA_DAMAGE_RESPONSE_ONLY_ATM_DEPENDENT	12/901	114/13198	0.0884068	0.97015	0.9638	12	DVL2,TCF7,PCK2,CCND3,FASLG,MYC,LEF1,TP53,ERBB2,WNT7A,SMAD3,BCL2
PID_MYC_ACTIV_PATHWAY	9/901	79/13198	0.0886963	0.97015	0.9638	9	TFRC,CAD,ID2,SLC2A1,CDK4,MYC,TP53,SMAD3,TK1
WP_3Q29_COPY_NUMBER_VARIATION_SYNDROME	9/901	79/13198	0.0886963	0.97015	0.9638	9	ZNF76,TFRC,RABL2B,WDR60,MYC,ERBB2,NRROS,FBXO45,MCRS1
BIOCARTA_EFP_PATHWAY	3/901	16/13198	0.0912858	0.9781	0.971698	3	CDK6,CDK4,TP53
BIOCARTA_P53_PATHWAY	3/901	16/13198	0.0912858	0.9781	0.971698	3	CDK4,TP53,BCL2
REACTOME_PROCESSING_OF_SMDT1	3/901	16/13198	0.0912858	0.9781	0.971698	3	AFG3L2,PMPCA,PHB
REACTOME_METABOLISM_OF_STEROIDS	15/901	151/13198	0.0916448	0.9781	0.971698	15	TSPOAP1,OSBPL7,MSMO1,OSBPL3,SQLE,MVK,DHCR24,TGS1,EBP,NSDHL,LSS,ELOVL6,AKR1C3,SREBF2,PLPP6
KEGG_SELENOAMINO_ACID_METABOLISM	4/901	26/13198	0.0975256	1	0.993455	4	HEMK1,GGT7,MAT2A,MARS2
REACTOME_RESOLUTION_OF_D_LOOP_STRUCTURES_THROUGH_SYNTHESIS_DEPENDENT_STRAND_ANNEALING_SDSA_	4/901	26/13198	0.0975256	1	0.993455	4	XRCC3,RAD51D,BLM,RTEL1
WP_EICOSANOID_SYNTHESIS	4/901	26/13198	0.0975256	1	0.993455	4	PTGDS,PTGES2,ALOX15,LTC4S
WP_IL18_SIGNALING_PATHWAY	25/901	279/13198	0.0986459	1	0.993455	25	APBA2,STOML1,SLC12A3,TBX21,CD81,IFNG,USP5,FASLG,ACADS,TOMM40,CD36,ITM2C,BIN1,IL18BP,TP53,RPTOR,EPS8,NSMF,ZNF444,BCL2,SNTB1,IMP3,RASA3,CCL4,CCL3
REACTOME_INTERLEUKIN_12_SIGNALING	6/901	47/13198	0.0986702	1	0.993455	6	IFNG,SNRPA1,HNRNPDL,BOLA2B,BOLA2,MIF
WP_MIRNA_REGULATION_OF_DNA_DAMAGE_RESPONSE	10/901	93/13198	0.101653	1	0.993455	10	SESN1,CDK6,CCND3,RAD1,DDB2,CDK4,MYC,TP53,RAD17,ATRIP
WP_WNT_SIGNALING	12/901	117/13198	0.10236	1	0.993455	12	DVL2,TCF7,NFATC2,CCND3,SFRP5,SERPINF1,MYC,LEF1,CAMK2D,WNT7A,CTBP1,FZD6
BIOCARTA_IL2RB_PATHWAY	5/901	37/13198	0.104823	1	0.993455	5	IL2RB,FASLG,MYC,BCL2,SOCS1
REACTOME_ACTIVATION_OF_ATR_IN_RESPONSE_TO_REPLICATION_STRESS	5/901	37/13198	0.104823	1	0.993455	5	MCM2,MCM3,RAD1,RAD17,ATRIP
REACTOME_HDR_THROUGH_SINGLE_STRAND_ANNEALING_SSA_	5/901	37/13198	0.104823	1	0.993455	5	ERCC1,RAD1,RAD17,ATRIP,BLM
WP_TARGET_OF_RAPAMYCIN_TOR_SIGNALING	5/901	37/13198	0.104823	1	0.993455	5	ULK3,RPTOR,MLST8,DDIT4,PRR5
BIOCARTA_TEL_PATHWAY	3/901	17/13198	0.105467	1	0.993455	3	MYC,TP53,BCL2
REACTOME_METABOLISM_OF_FOLATE_AND_PTERINES	3/901	17/13198	0.105467	1	0.993455	3	FPGS,MTHFR,DHFR
REACTOME_PROTEIN_METHYLATION	3/901	17/13198	0.105467	1	0.993455	3	ETFB,EEF2KMT,PRMT3
WP_PYRIMIDINE_METABOLISM_AND_RELATED_DISEASES	3/901	17/13198	0.105467	1	0.993455	3	CAD,DHODH,NT5C
PID_HES_HEY_PATHWAY	6/901	48/13198	0.106628	1	0.993455	6	TCF3,MYB,HES6,CAMK2D,CTBP1,TLE1
REACTOME_EUKARYOTIC_TRANSLATION_ELONGATION	10/901	94/13198	0.107208	1	0.993455	10	RPS5,RPS16,RPS19,RPS15,RPL36,RPL39L,RPL13,RPLP2,RPL10A,RPS28
REACTOME_SELENOAMINO_ACID_METABOLISM	12/901	118/13198	0.107286	1	0.993455	12	RPS5,RPS16,RPS19,AIMP2,RPS15,RPL36,EEFSEC,RPL39L,RPL13,RPLP2,RPL10A,RPS28
REACTOME_ACTIVATION_OF_THE_MRNA_UPON_BINDING_OF_THE_CAP_BINDING_COMPLEX_AND_EIFS_AND_SUBSEQUENT_BINDING_TO_43S	7/901	60/13198	0.112995	1	0.993455	7	RPS5,RPS16,RPS19,EIF3B,RPS15,EIF3G,RPS28
KEGG_SMALL_CELL_LUNG_CANCER	9/901	84/13198	0.118313	1	0.993455	9	TRAF5,ITGA6,CDK6,CDK4,MYC,TP53,BCL2,FHIT,LAMA2
REACTOME_RNA_POLYMERASE_III_TRANSCRIPTION_INITIATION_FROM_TYPE_3_PROMOTER	4/901	28/13198	0.120259	1	0.993455	4	POLR3E,POLR3H,POLR3A,POLR1C
REACTOME_SYNTHESIS_OF_GLYCOSYLPHOSPHATIDYLINOSITOL_GPI_	3/901	18/13198	0.120445	1	0.993455	3	PIGL,PIGO,PIGW
KEGG_LYSOSOME	12/901	121/13198	0.122887	1	0.993455	12	AGA,PLA2G15,LIPA,NAGLU,SLC11A2,GNPTAB,IDUA,ACP2,SMPD1,CTSW,CTSF,CTSO
KEGG_GLUTATHIONE_METABOLISM	6/901	50/13198	0.123499	1	0.993455	6	GCLC,GSTZ1,GPX7,SRM,GGT7,IDH2
REACTOME_CHONDROITIN_SULFATE_DERMATAN_SULFATE_METABOLISM	6/901	50/13198	0.123499	1	0.993455	6	B3GAT1,IDUA,CHST12,B3GAT3,CHST14,B3GALT6
PID_E2F_PATHWAY	8/901	73/13198	0.123569	1	0.993455	8	CBX5,MCM3,CCND3,TFDP2,MYC,TK1,HIC1,DHFR
WP_TGFBETA_RECEPTOR_SIGNALLING_IN_SKELETAL_DYSPLASIAS	7/901	62/13198	0.128432	1	0.993455	7	RUNX3,IFNG,LEF1,ADAMTS10,SMAD3,LTBP3,NOG
WP_SMALL_CELL_LUNG_CANCER	10/901	98/13198	0.13112	1	0.993455	10	TRAF5,ITGA6,CDK6,DDB2,CDK4,MYC,TP53,BCL2,FHIT,LAMA2
KEGG_UBIQUITIN_MEDIATED_PROTEOLYSIS	13/901	135/13198	0.131637	1	0.993455	13	RHOBTB2,CDC23,PPIL2,PRPF19,FANCL,CDC16,DDB2,CUL4A,DET1,FBXO4,ANAPC2,SOCS1,NHLRC1
KEGG_THYROID_CANCER	4/901	29/13198	0.132403	1	0.993455	4	TCF7,MYC,LEF1,TP53
REACTOME_G1_S_SPECIFIC_TRANSCRIPTION	4/901	29/13198	0.132403	1	0.993455	4	TFDP2,TK1,LIN52,DHFR
REACTOME_MITOPHAGY	4/901	29/13198	0.132403	1	0.993455	4	TOMM40,TOMM70,MTERF3,PGAM5
NABA_BASEMENT_MEMBRANES	5/901	40/13198	0.134457	1	0.993455	5	PAPLN,NID1,COL6A2,LAMA2,COLQ
WP_FERROPTOSIS	5/901	40/13198	0.134457	1	0.993455	5	GCLC,TFRC,SLC11A2,TP53,ALOX15
WP_THE_INFLUENCE_OF_LAMINOPATHIES_ON_WNT_SIGNALING	5/901	40/13198	0.134457	1	0.993455	5	TCF7,CDK6,LEF1,TARBP2,TLE1
BIOCARTA_IL12_PATHWAY	3/901	19/13198	0.136146	1	0.993455	3	IFNG,CXCR3,CD247
BIOCARTA_TID_PATHWAY	3/901	19/13198	0.136146	1	0.993455	3	DNAJA3,IFNG,TP53
BIOCARTA_TOB1_PATHWAY	3/901	19/13198	0.136146	1	0.993455	3	IFNG,SMAD3,CD247
REACTOME_BIOSYNTHESIS_OF_SPECIALIZED_PRORESOLVING_MEDIATORS_SPMS_	3/901	19/13198	0.136146	1	0.993455	3	EPHX2,ALOX15,LTC4S
REACTOME_LDL_CLEARANCE	3/901	19/13198	0.136146	1	0.993455	3	LSR,LIPA,LDLRAP1
REACTOME_PROCESSING_OF_INTRONLESS_PRE_MRNAS	3/901	19/13198	0.136146	1	0.993455	3	SYMPK,CPSF4,CSTF3
REACTOME_TRANSCRIPTION_OF_E2F_TARGETS_UNDER_NEGATIVE_CONTROL_BY_DREAM_COMPLEX	3/901	19/13198	0.136146	1	0.993455	3	TFDP2,MYC,LIN52
SA_CASPASE_CASCADE	3/901	19/13198	0.136146	1	0.993455	3	FASLG,PRF1,SREBF2
WP_SMALL_LIGAND_GPCRS	3/901	19/13198	0.136146	1	0.993455	3	PTGER2,PTGDR,CNR2
REACTOME_PEROXISOMAL_PROTEIN_IMPORT	7/901	63/13198	0.136528	1	0.993455	7	ACOT2,EPHX2,HACL1,PEX14,TYSND1,PEX10,DECR2
KEGG_MTOR_SIGNALING_PATHWAY	6/901	52/13198	0.141588	1	0.993455	6	RPS6KA2,CAB39L,ULK3,RPTOR,MLST8,DDIT4
PID_CDC42_REG_PATHWAY	4/901	30/13198	0.145026	1	0.993455	4	GIT1,ARHGEF9,DOCK10,ARHGAP17
REACTOME_FOXO_MEDIATED_TRANSCRIPTION_OF_OXIDATIVE_STRESS_METABOLIC_AND_NEURONAL_GENES	4/901	30/13198	0.145026	1	0.993455	4	SIRT3,FBXO32,SMAD3,PLXNA4
REACTOME_TRANSCRIPTIONAL_REGULATION_BY_VENTX	5/901	41/13198	0.145083	1	0.993455	5	CDC23,CDC16,LEF1,TP53,ANAPC2
WP_BLADDER_CANCER	5/901	41/13198	0.145083	1	0.993455	5	RASSF1,CDK4,MYC,TP53,ERBB2
KEGG_RIBOSOME	9/901	88/13198	0.145427	1	0.993455	9	RPS5,RPS16,RPS19,RPS15,RPL36,RPL13,RPLP2,RPL10A,RPS28
BIOCARTA_CPSF_PATHWAY	2/901	10/13198	0.145603	1	0.993455	2	CPSF4,CSTF3
BIOCARTA_RHODOPSIN_PATHWAY	2/901	10/13198	0.145603	1	0.993455	2	PDE6B,SLC25A22
REACTOME_DISEASES_OF_DNA_REPAIR	2/901	10/13198	0.145603	1	0.993455	2	MUTYH,NEIL1
REACTOME_FGFR2B_LIGAND_BINDING_AND_ACTIVATION	2/901	10/13198	0.145603	1	0.993455	2	FGFBP2,FGFBP3
REACTOME_KETONE_BODY_METABOLISM	2/901	10/13198	0.145603	1	0.993455	2	BDH1,BDH2
REACTOME_REGULATION_OF_COMMISSURAL_AXON_PATHFINDING_BY_SLIT_AND_ROBO	2/901	10/13198	0.145603	1	0.993455	2	ROBO3,NELL2
REACTOME_RUNX1_AND_FOXP3_CONTROL_THE_DEVELOPMENT_OF_REGULATORY_T_LYMPHOCYTES_TREGS_	2/901	10/13198	0.145603	1	0.993455	2	NFATC2,IFNG
WP_MAMMARY_GLAND_DEVELOPMENT_PATHWAY_INVOLUTION_STAGE_4_OF_4	2/901	10/13198	0.145603	1	0.993455	2	MYC,TP53
WP_HEAD_AND_NECK_SQUAMOUS_CELL_CARCINOMA	8/901	76/13198	0.145862	1	0.993455	8	SESN1,CDK6,CDK4,TP53,RPTOR,ERBB2,MLST8,DDIT4
REACTOME_HOMOLOGY_DIRECTED_REPAIR	13/901	138/13198	0.148186	1	0.993455	13	ERCC1,TIPIN,POLD2,RAD1,XRCC3,SLX1A,MDC1,RAD17,ATRIP,FEN1,RAD51D,BLM,RTEL1
REACTOME_SRP_DEPENDENT_COTRANSLATIONAL_PROTEIN_TARGETING_TO_MEMBRANE	11/901	113/13198	0.148348	1	0.993455	11	RPS5,RPS16,RPS19,RPS15,RPL36,SRPRB,RPL39L,RPL13,RPLP2,RPL10A,RPS28
KEGG_WNT_SIGNALING_PATHWAY	14/901	151/13198	0.15013	1	0.993455	14	DVL2,TCF7,NFATC2,PPP2R1A,CCND3,SFRP5,MYC,LEF1,TP53,CAMK2D,WNT7A,CTBP1,FZD6,SMAD3
REACTOME_FORMATION_OF_TC_NER_PRE_INCISION_COMPLEX	6/901	53/13198	0.151066	1	0.993455	6	ERCC2,PRPF19,GTF2H3,CUL4A,ERCC3,GPS1
WP_TRANSLATION_FACTORS	6/901	53/13198	0.151066	1	0.993455	6	EIF3B,EIF2B1,EIF3G,CLUH,EIF2B5,GSPT2
REACTOME_ABERRANT_REGULATION_OF_MITOTIC_EXIT_IN_CANCER_DUE_TO_RB1_DEFECTS	3/901	20/13198	0.152499	1	0.993455	3	CDC23,CDC16,ANAPC2
REACTOME_CLASS_I_PEROXISOMAL_MEMBRANE_PROTEIN_IMPORT	3/901	20/13198	0.152499	1	0.993455	3	ABCD3,PEX16,PEX14
REACTOME_CONVERSION_FROM_APC_C_CDC20_TO_APC_C_CDH1_IN_LATE_ANAPHASE	3/901	20/13198	0.152499	1	0.993455	3	CDC23,CDC16,ANAPC2
REACTOME_LAGGING_STRAND_SYNTHESIS	3/901	20/13198	0.152499	1	0.993455	3	LIG1,POLD2,FEN1
REACTOME_PHOSPHORYLATION_OF_THE_APC_C	3/901	20/13198	0.152499	1	0.993455	3	CDC23,CDC16,ANAPC2
REACTOME_SUMOYLATION_OF_TRANSCRIPTION_FACTORS	3/901	20/13198	0.152499	1	0.993455	3	TP53,HIC1,SUMO3
WP_HEREDITARY_LEIOMYOMATOSIS_AND_RENAL_CELL_CARCINOMA_PATHWAY	3/901	20/13198	0.152499	1	0.993455	3	SLC11A2,SLC2A1,TP53
WP_NANOMATERIAL_INDUCED_APOPTOSIS	3/901	20/13198	0.152499	1	0.993455	3	FASLG,BCL2,PRF1
WP_PANCREATIC_ADENOCARCINOMA_PATHWAY	9/901	89/13198	0.152658	1	0.993455	9	PEBP1,CDK6,PAK4,DDB2,CDK4,PAK6,TP53,ERBB2,SMAD3
PID_CD8_TCR_DOWNSTREAM_PATHWAY	7/901	65/13198	0.153443	1	0.993455	7	IL2RB,NFATC2,IFNG,FASLG,EOMES,PRF1,CD247
REACTOME_DUAL_INCISION_IN_TC_NER	7/901	65/13198	0.153443	1	0.993455	7	ERCC1,ERCC2,POLD2,PRPF19,GTF2H3,CUL4A,ERCC3
KEGG_BLADDER_CANCER	5/901	42/13198	0.156056	1	0.993455	5	RASSF1,CDK4,MYC,TP53,ERBB2
REACTOME_DEACTIVATION_OF_THE_BETA_CATENIN_TRANSACTIVATING_COMPLEX	5/901	42/13198	0.156056	1	0.993455	5	TCF7,LEF1,CTBP1,BCL9L,TLE1
WP_ETHANOL_EFFECTS_ON_HISTONE_MODIFICATIONS	4/901	31/13198	0.158095	1	0.993455	4	HDAC9,MTR,MTHFR,DHFR
WP_ONE_CARBON_METABOLISM	4/901	31/13198	0.158095	1	0.993455	4	MTR,ATIC,MTHFR,DHFR
KEGG_NON_SMALL_CELL_LUNG_CANCER	6/901	54/13198	0.160819	1	0.993455	6	RASSF1,CDK6,CDK4,TP53,ERBB2,FHIT
REACTOME_SNRNP_ASSEMBLY	6/901	54/13198	0.160819	1	0.993455	6	NUP37,NUP188,NUP107,WDR77,TGS1,GEMIN4
REACTOME_BIOSYNTHESIS_OF_THE_N_GLYCAN_PRECURSOR_DOLICHOL_LIPID_LINKED_OLIGOSACCHARIDE_LLO_AND_TRANSFER_TO_A_NASCENT_PROTEIN	8/901	78/13198	0.161743	1	0.993455	8	ALG9,FUOM,ALG8,DOLPP1,ALG14,GMPPB,MPI,ALG3
REACTOME_DNA_DOUBLE_STRAND_BREAK_REPAIR	15/901	166/13198	0.162279	1	0.993455	15	ERCC1,TIPIN,POLD2,RAD1,XRCC3,SLX1A,MDC1,TP53,RAD17,ATRIP,APBB1,FEN1,RAD51D,BLM,RTEL1
REACTOME_TRANSPORT_OF_MATURE_MRNAS_DERIVED_FROM_INTRONLESS_TRANSCRIPTS	5/901	43/13198	0.167358	1	0.993455	5	NUP37,NUP188,NUP107,SYMPK,CPSF4
KEGG_GLYCOSAMINOGLYCAN_DEGRADATION	3/901	21/13198	0.169431	1	0.993455	3	NAGLU,HS3ST3B1,IDUA
REACTOME_COBALAMIN_CBL_VITAMIN_B12_TRANSPORT_AND_METABOLISM	3/901	21/13198	0.169431	1	0.993455	3	MTR,MMAB,CD320
REACTOME_INHIBITION_OF_THE_PROTEOLYTIC_ACTIVITY_OF_APC_C_REQUIRED_FOR_THE_ONSET_OF_ANAPHASE_BY_MITOTIC_SPINDLE_CHECKPOINT_COMPONENTS	3/901	21/13198	0.169431	1	0.993455	3	CDC23,CDC16,ANAPC2
REACTOME_SYNAPTIC_ADHESION_LIKE_MOLECULES	3/901	21/13198	0.169431	1	0.993455	3	PTPRS,LRFN3,LRFN4
WP_IMATINIB_AND_CHRONIC_MYELOID_LEUKEMIA	3/901	21/13198	0.169431	1	0.993455	3	NOP2,PDGFRB,MYC
WP_UREA_CYCLE_AND_METABOLISM_OF_AMINO_GROUPS	3/901	21/13198	0.169431	1	0.993455	3	SRM,GATM,ACY1
BIOCARTA_PTC1_PATHWAY	2/901	11/13198	0.17027	1	0.993455	2	CDC25B,PTCH1
KEGG_FOLATE_BIOSYNTHESIS	2/901	11/13198	0.17027	1	0.993455	2	FPGS,DHFR
PID_INTEGRIN4_PATHWAY	2/901	11/13198	0.17027	1	0.993455	2	ITGA6,LAMA2
REACTOME_ACTIVATION_OF_THE_PHOTOTRANSDUCTION_CASCADE	2/901	11/13198	0.17027	1	0.993455	2	SLC24A1,PDE6B
REACTOME_BIOTIN_TRANSPORT_AND_METABOLISM	2/901	11/13198	0.17027	1	0.993455	2	MCCC2,HLCS
REACTOME_MITOCHONDRIAL_FATTY_ACID_BETA_OXIDATION_OF_SATURATED_FATTY_ACIDS	2/901	11/13198	0.17027	1	0.993455	2	MECR,ACADS
REACTOME_MUCOPOLYSACCHARIDOSES	2/901	11/13198	0.17027	1	0.993455	2	NAGLU,IDUA
REACTOME_PYRIMIDINE_SALVAGE	2/901	11/13198	0.17027	1	0.993455	2	UCK2,TK1
REACTOME_REMOVAL_OF_THE_FLAP_INTERMEDIATE_FROM_THE_C_STRAND	2/901	11/13198	0.17027	1	0.993455	2	POLD2,FEN1
PID_IL2_1PATHWAY	6/901	55/13198	0.170835	1	0.993455	6	IL2RB,IFNG,CISH,MYC,BCL2,SOCS1
REACTOME_REGULATION_OF_CHOLESTEROL_BIOSYNTHESIS_BY_SREBP_SREBF_	6/901	55/13198	0.170835	1	0.993455	6	SQLE,MVK,TGS1,LSS,ELOVL6,SREBF2
PID_IL12_STAT4_PATHWAY	4/901	32/13198	0.171579	1	0.993455	4	TBX21,IFNG,PRF1,CD247
WP_OVARIAN_INFERTILITY_GENES	4/901	32/13198	0.171579	1	0.993455	4	PTGER2,CDK4,SMPD1,SMAD3
PID_CERAMIDE_PATHWAY	5/901	44/13198	0.17897	1	0.993455	5	SPHK2,SMPD3,MYC,SMPD1,BCL2
REACTOME_DEADENYLATION_DEPENDENT_MRNA_DECAY	6/901	56/13198	0.181102	1	0.993455	6	EXOSC5,EXOSC8,EXOSC9,PARN,EDC3,EXOSC6
REACTOME_INFLUENZA_INFECTION	14/901	157/13198	0.184868	1	0.993455	14	NUP37,RPS5,NUP188,RPS16,RPS19,NUP107,RPS15,RPL36,CPSF4,RPL39L,RPL13,RPLP2,RPL10A,RPS28
REACTOME_CD28_CO_STIMULATION	4/901	33/13198	0.185445	1	0.993455	4	TRIB3,MLST8,YES1,PRR5
WP_TUMOR_SUPPRESSOR_ACTIVITY_OF_SMARCB1	4/901	33/13198	0.185445	1	0.993455	4	CDK6,CDK4,PTCH1,GLI4
REACTOME_CD28_DEPENDENT_PI3K_AKT_SIGNALING	3/901	22/13198	0.18687	1	0.993455	3	TRIB3,MLST8,PRR5
REACTOME_CITRIC_ACID_CYCLE_TCA_CYCLE_	3/901	22/13198	0.18687	1	0.993455	3	FH,FAHD1,IDH2
REACTOME_ERK_MAPK_TARGETS	3/901	22/13198	0.18687	1	0.993455	3	RPS6KA2,PPP2R1A,DUSP7
REACTOME_PINK1_PRKN_MEDIATED_MITOPHAGY	3/901	22/13198	0.18687	1	0.993455	3	TOMM40,TOMM70,MTERF3
WP_FATTY_ACID_BIOSYNTHESIS	3/901	22/13198	0.18687	1	0.993455	3	MECR,ECHDC2,ACAA2
REACTOME_RECRUITMENT_OF_MITOTIC_CENTROSOME_PROTEINS_AND_COMPLEXES	8/901	81/13198	0.186985	1	0.993455	8	OFD1,PPP2R1A,CEP250,HAUS6,MZT2B,MZT2A,HAUS5,TUBGCP5
WP_DNA_IRDAMAGE_AND_CELLULAR_RESPONSE_VIA_ATR	8/901	81/13198	0.186985	1	0.993455	8	MCM2,RAD1,MDC1,FANCI,TP53,RAD17,ATRIP,FEN1
PID_NFAT_TFPATHWAY	5/901	45/13198	0.190874	1	0.993455	5	TBX21,NFATC2,IFNG,FASLG,CDK4
ST_T_CELL_SIGNAL_TRANSDUCTION	5/901	45/13198	0.190874	1	0.993455	5	ZAP70,PAK4,PAK6,RASGRP3,LAT
WP_PROSTAGLANDIN_SYNTHESIS_AND_REGULATION	5/901	45/13198	0.190874	1	0.993455	5	PTGDS,PTGER2,PPARGC1B,PTGDR,AKR1C3
REACTOME_MITOCHONDRIAL_BIOGENESIS	9/901	94/13198	0.191327	1	0.993455	9	POLRMT,TWNK,NR1D1,TGS1,SIRT3,PPRC1,PPARGC1B,TFB2M,IDH2
REACTOME_INTERLEUKIN_12_FAMILY_SIGNALING	6/901	57/13198	0.191608	1	0.993455	6	IFNG,SNRPA1,HNRNPDL,BOLA2B,BOLA2,MIF
REACTOME_GLUTATHIONE_SYNTHESIS_AND_RECYCLING	2/901	12/13198	0.195553	1	0.993455	2	GCLC,GGT7
REACTOME_KILLING_MECHANISMS	2/901	12/13198	0.195553	1	0.993455	2	DVL2,NOXA1
REACTOME_PYRIMIDINE_CATABOLISM	2/901	12/13198	0.195553	1	0.993455	2	NT5C,NT5E
REACTOME_UNWINDING_OF_DNA	2/901	12/13198	0.195553	1	0.993455	2	MCM2,MCM3
WP_IRON_METABOLISM_IN_PLACENTA	2/901	12/13198	0.195553	1	0.993455	2	TFRC,SLC11A2
KEGG_BUTANOATE_METABOLISM	4/901	34/13198	0.199657	1	0.993455	4	ACADS,ALDH1B1,BDH1,BDH2
PID_ATM_PATHWAY	4/901	34/13198	0.199657	1	0.993455	4	MDC1,RAD17,CTBP1,BLM
PID_HIF2PATHWAY	4/901	34/13198	0.199657	1	0.993455	4	APEX1,SLC11A2,SLC2A1,FXN
REACTOME_DISEASES_OF_CARBOHYDRATE_METABOLISM	4/901	34/13198	0.199657	1	0.993455	4	NAGLU,EPM2A,IDUA,NHLRC1
REACTOME_TELOMERE_C_STRAND_LAGGING_STRAND_SYNTHESIS	4/901	34/13198	0.199657	1	0.993455	4	LIG1,POLD2,FEN1,BLM
WP_PURINERGIC_SIGNALING	4/901	34/13198	0.199657	1	0.993455	4	P2RX7,P2RX4,P2RY11,ADORA3
BIOCARTA_CELLCYCLE_PATHWAY	3/901	23/13198	0.204745	1	0.993455	3	CDK6,CCND3,CDK4
PID_RHODOPSIN_PATHWAY	3/901	23/13198	0.204745	1	0.993455	3	SLC24A1,RGS9,PDE6B
WP_CANCER_IMMUNOTHERAPY_BY_PD1_BLOCKADE	3/901	23/13198	0.204745	1	0.993455	3	NFATC2,IFNG,ZAP70
KEGG_RNA_DEGRADATION	6/901	59/13198	0.213285	1	0.993455	6	EXOSC5,EXOSC8,EXOSC9,PARN,EDC3,EXOSC6
REACTOME_ARACHIDONIC_ACID_METABOLISM	6/901	59/13198	0.213285	1	0.993455	6	PTGDS,EPHX2,PTGES2,ALOX15,AKR1C3,LTC4S
REACTOME_NRAGE_SIGNALS_DEATH_THROUGH_JNK	6/901	59/13198	0.213285	1	0.993455	6	TRIO,PLEKHG2,ARHGEF9,ARHGEF4,OBSCN,MAGED1
WP_EGFR_TYROSINE_KINASE_INHIBITOR_RESISTANCE	8/901	84/13198	0.213779	1	0.993455	8	PDGFRB,RRAS2,MYC,ERBB2,PDGFC,PDGFD,BCL2,GAS6
REACTOME_ONCOGENE_INDUCED_SENESCENCE	4/901	35/13198	0.214183	1	0.993455	4	CDK6,TFDP2,CDK4,TP53
REACTOME_THE_CITRIC_ACID_TCA_CYCLE_AND_RESPIRATORY_ELECTRON_TRANSPORT	15/901	175/13198	0.215262	1	0.993455	15	FH,NDUFB7,GSTZ1,ETFB,NDUFS7,TRAP1,LRPPRC,NDUFV1,NDUFA11,ACAD9,NDUFAF3,CYC1,FAHD1,IDH2,NDUFS3
REACTOME_CYCLIN_D_ASSOCIATED_EVENTS_IN_G1	5/901	47/13198	0.215474	1	0.993455	5	PPP2R1A,CDK6,CCND3,TFDP2,CDK4
REACTOME_METABOLISM_OF_WATER_SOLUBLE_VITAMINS_AND_COFACTORS	11/901	123/13198	0.218229	1	0.993455	11	MTR,SLC2A1,MCCC2,NT5E,FPGS,MMAB,HLCS,CD320,MTHFR,SLC52A2,DHFR
WP_NONSMALL_CELL_LUNG_CANCER	7/901	72/13198	0.219412	1	0.993455	7	RASSF1,CDK6,DDB2,CDK4,TP53,ERBB2,FHIT
REACTOME_ACTIVATION_OF_RAC1	2/901	13/13198	0.221255	1	0.993455	2	PAK4,PAK6
REACTOME_ERKS_ARE_INACTIVATED	2/901	13/13198	0.221255	1	0.993455	2	PPP2R1A,DUSP7
REACTOME_INHIBITION_OF_REPLICATION_INITIATION_OF_DAMAGED_DNA_BY_RB1_E2F1	2/901	13/13198	0.221255	1	0.993455	2	PPP2R1A,TFDP2
REACTOME_PURINE_SALVAGE	2/901	13/13198	0.221255	1	0.993455	2	ADAL,APRT
WP_HOMOLOGOUS_RECOMBINATION	2/901	13/13198	0.221255	1	0.993455	2	POLD2,RAD54B
WP_MAMMARY_GLAND_DEVELOPMENT_PATHWAY_PUBERTY_STAGE_2_OF_4	2/901	13/13198	0.221255	1	0.993455	2	MYC,ERBB2
WP_NO_METABOLISM_IN_CYSTIC_FIBROSIS	2/901	13/13198	0.221255	1	0.993455	2	PRMT7,PRMT3
WP_VALPROIC_ACID_PATHWAY	2/901	13/13198	0.221255	1	0.993455	2	IVD,ACADSB
REACTOME_APC_C_CDC20_MEDIATED_DEGRADATION_OF_CYCLIN_B	3/901	24/13198	0.222988	1	0.993455	3	CDC23,CDC16,ANAPC2
REACTOME_CYTOSOLIC_SULFONATION_OF_SMALL_MOLECULES	3/901	24/13198	0.222988	1	0.993455	3	PODXL2,ABHD14B,SLC35B2
REACTOME_DISEASES_OF_PROGRAMMED_CELL_DEATH	3/901	24/13198	0.222988	1	0.993455	3	CDC25B,C1QBP,FASLG
REACTOME_PURINERGIC_SIGNALING_IN_LEISHMANIASIS_INFECTION	3/901	24/13198	0.222988	1	0.993455	3	P2RX7,P2RX4,NT5E
WP_NANOPARTICLE_TRIGGERED_AUTOPHAGIC_CELL_DEATH	3/901	24/13198	0.222988	1	0.993455	3	ATG14,BCL2,ATG9B
WP_THE_OVERLAP_BETWEEN_SIGNAL_TRANSDUCTION_PATHWAYS_THAT_CONTRIBUTE_TO_A_RANGE_OF_LMNA_LAMINOPATHIES	6/901	60/13198	0.224428	1	0.993455	6	TCF7,CDK4,LEF1,TARBP2,SMAD3,TLE1
REACTOME_RESPIRATORY_ELECTRON_TRANSPORT_ATP_SYNTHESIS_BY_CHEMIOSMOTIC_COUPLING_AND_HEAT_PRODUCTION_BY_UNCOUPLING_PROTEINS_	11/901	124/13198	0.225874	1	0.993455	11	NDUFB7,ETFB,NDUFS7,TRAP1,LRPPRC,NDUFV1,NDUFA11,ACAD9,NDUFAF3,CYC1,NDUFS3
WP_ENERGY_METABOLISM	5/901	48/13198	0.228131	1	0.993455	5	MYBBP1A,SIRT3,PPRC1,PPARGC1B,TFB2M
REACTOME_NUCLEOBASE_CATABOLISM	4/901	36/13198	0.228988	1	0.993455	4	DNPH1,NT5C,ITPA,NT5E
WP_APOPTOSIS	8/901	86/13198	0.232409	1	0.993455	8	FASLG,HELLS,MYC,TP53,TNFRSF21,BCL2,BOK,PRF1
REACTOME_SLC_TRANSPORTER_DISORDERS	9/901	99/13198	0.233735	1	0.993455	9	SLC12A3,SLC24A1,NUP37,NUP188,SLC11A2,NUP107,SLC2A1,SLC35A3,SLC39A4
KEGG_ARRHYTHMOGENIC_RIGHT_VENTRICULAR_CARDIOMYOPATHY_ARVC	7/901	74/13198	0.239899	1	0.993455	7	CACNA2D2,TCF7,ITGA6,CACNG6,LEF1,ITGB7,LAMA2
REACTOME_COSTIMULATION_BY_THE_CD28_FAMILY	7/901	74/13198	0.239899	1	0.993455	7	TRIB3,PPP2R1A,MLST8,YES1,BTLA,PRR5,CD247
WP_CHROMOSOMAL_AND_MICROSATELLITE_INSTABILITY_IN_COLORECTAL_CANCER	7/901	74/13198	0.239899	1	0.993455	7	TCF7,DDB2,MYC,LEF1,TP53,SMAD3,BCL2
REACTOME_RETROGRADE_TRANSPORT_AT_THE_TRANS_GOLGI_NETWORK	5/901	49/13198	0.240997	1	0.993455	5	ARFRP1,VPS51,RHOBTB3,COG1,COG7
KEGG_ALLOGRAFT_REJECTION	4/901	37/13198	0.244039	1	0.993455	4	IFNG,FASLG,PRF1,HLA-DOA
REACTOME_FATTY_ACYL_COA_BIOSYNTHESIS	4/901	37/13198	0.244039	1	0.993455	4	SLC25A1,MORC2,ELOVL6,HSD17B8
REACTOME_REGULATION_OF_TP53_EXPRESSION_AND_DEGRADATION	4/901	37/13198	0.244039	1	0.993455	4	PPP2R1A,TP53,MLST8,PRR5
WP_FACTORS_AND_PATHWAYS_AFFECTING_INSULINLIKE_GROWTH_FACTOR_IGF1AKT_SIGNALING	4/901	37/13198	0.244039	1	0.993455	4	RPTOR,FBXO32,SMAD3,MLST8
BIOCARTA_HSP27_PATHWAY	2/901	14/13198	0.2472	1	0.993455	2	FASLG,BCL2
BIOCARTA_TCRA_PATHWAY	2/901	14/13198	0.2472	1	0.993455	2	ZAP70,CD247
REACTOME_EARLY_PHASE_OF_HIV_LIFE_CYCLE	2/901	14/13198	0.2472	1	0.993455	2	LIG1,FEN1
REACTOME_HEME_BIOSYNTHESIS	2/901	14/13198	0.2472	1	0.993455	2	COX10,UROS
REACTOME_LYSOSPHINGOLIPID_AND_LPA_RECEPTORS	2/901	14/13198	0.2472	1	0.993455	2	S1PR5,LPAR5
REACTOME_METHYLATION	2/901	14/13198	0.2472	1	0.993455	2	MTR,MAT2A
REACTOME_REGULATION_OF_IFNG_SIGNALING	2/901	14/13198	0.2472	1	0.993455	2	IFNG,SOCS1
REACTOME_TP53_REGULATES_TRANSCRIPTION_OF_SEVERAL_ADDITIONAL_CELL_DEATH_GENES_WHOSE_SPECIFIC_ROLES_IN_P53_DEPENDENT_APOPTOSIS_REMAIN_UNCERTAIN	2/901	14/13198	0.2472	1	0.993455	2	RABGGTA,TP53
KEGG_COLORECTAL_CANCER	6/901	62/13198	0.247255	1	0.993455	6	TCF7,MYC,LEF1,TP53,SMAD3,BCL2
WP_TCELL_ANTIGEN_RECEPTOR_TCR_PATHWAY_DURING_STAPHYLOCOCCUS_AUREUS_INFECTION	6/901	62/13198	0.247255	1	0.993455	6	NFATC2,IFNG,ZAP70,CDK4,CARD11,LAT
REACTOME_NEDDYLATION	19/901	234/13198	0.247918	1	0.993455	19	ASB1,FBXO31,ZBTB16,SPSB2,CUL9,CISH,DCAF4,FBXL16,FBXO44,DDB2,CUL4A,KLHL3,COMMD7,FBXO4,FBXO32,NAE1,FBXO41,DCAF13,GPS1
REACTOME_TOLL_LIKE_RECEPTOR_4_TLR4_CASCADE	11/901	127/13198	0.249419	1	0.993455	11	SARM1,RPS6KA2,PTPN4,TAB1,PPP2R1A,CD180,CD36,S100B,DUSP7,SIGIRR,SOCS1
WP_INTEGRATED_BREAST_CANCER_PATHWAY	13/901	154/13198	0.252871	1	0.993455	13	TAB1,CDC25B,XRCC3,ERAL1,CDK4,MYC,TP53,RASGRP3,PHB,BCL2,NOXA1,BLM,APOBEC3G
WP_HEPATITIS_C_AND_HEPATOCELLULAR_CARCINOMA	5/901	50/13198	0.254053	1	0.993455	5	FASLG,MYC,LEF1,TP53,SMAD3
PID_ERA_GENOMIC_PATHWAY	6/901	63/13198	0.258911	1	0.993455	6	HSF2,MPG,DDX54,MYC,APBB1,KLRC3
WP_ENDOMETRIAL_CANCER	6/901	63/13198	0.258911	1	0.993455	6	TCF7,DDB2,MYC,LEF1,TP53,ERBB2
REACTOME_HSF1_DEPENDENT_TRANSACTIVATION	4/901	38/13198	0.259301	1	0.993455	4	RPTOR,CAMK2D,TNFRSF21,MLST8
REACTOME_TRANSCRIPTIONAL_REGULATION_BY_THE_AP_2_TFAP2_FAMILY_OF_TRANSCRIPTION_FACTORS	4/901	38/13198	0.259301	1	0.993455	4	NOP2,MYC,ERBB2,KCTD15
WP_SLEEP_REGULATION	4/901	38/13198	0.259301	1	0.993455	4	PER3,CACNA1I,PTGDS,PTGDR
REACTOME_A_TETRASACCHARIDE_LINKER_SEQUENCE_IS_REQUIRED_FOR_GAG_SYNTHESIS	3/901	26/13198	0.260317	1	0.993455	3	B3GAT1,B3GAT3,B3GALT6
REACTOME_APC_CDC20_MEDIATED_DEGRADATION_OF_NEK2A	3/901	26/13198	0.260317	1	0.993455	3	CDC23,CDC16,ANAPC2
WP_ARRHYTHMOGENIC_RIGHT_VENTRICULAR_CARDIOMYOPATHY	7/901	76/13198	0.260967	1	0.993455	7	CACNA2D2,TCF7,ITGA6,CACNG6,LEF1,ITGB7,LAMA2
KEGG_PROSTATE_CANCER	8/901	89/13198	0.261352	1	0.993455	8	TCF7,PDGFRB,LEF1,TP53,ERBB2,PDGFC,PDGFD,BCL2
REACTOME_METABOLISM_OF_AMINO_ACIDS_AND_DERIVATIVES	29/901	374/13198	0.262795	1	0.993455	29	MRI1,RPS5,GSTZ1,RPS16,RPS19,AIMP2,RPS15,SLC25A12,SRM,MTR,KMO,ALDH6A1,LIAS,IVD,RPL36,MCCC2,EEFSEC,GCSH,NMRAL1,RPL39L,RPL13,SRR,GATM,CARNS1,RPLP2,ACADSB,RPL10A,RPS28,BCKDHA
PID_PTP1B_PATHWAY	5/901	51/13198	0.267276	1	0.993455	5	PDGFRB,SPRY2,BLK,YES1,LAT
WP_PHOTODYNAMIC_THERAPYINDUCED_AP1_SURVIVAL_SIGNALING	5/901	51/13198	0.267276	1	0.993455	5	TRAF5,IFNG,FASLG,TP53,BCL2
REACTOME_SUMOYLATION_OF_DNA_DAMAGE_RESPONSE_AND_REPAIR_PROTEINS	7/901	77/13198	0.271693	1	0.993455	7	NUP37,NUP188,NSMCE4A,NUP107,MDC1,SUMO3,BLM
WP_JOUBERT_SYNDROME	7/901	77/13198	0.271693	1	0.993455	7	OFD1,TCTN3,BBS2,PDE6B,TMEM237,ANKS6,BBS1
BIOCARTA_ERYTH_PATHWAY	2/901	15/13198	0.273235	1	0.993455	2	FLT3,CCL3
REACTOME_MISMATCH_REPAIR	2/901	15/13198	0.273235	1	0.993455	2	LIG1,POLD2
SA_G1_AND_S_PHASES	2/901	15/13198	0.273235	1	0.993455	2	CDK4,TP53
WP_CYSTEINE_AND_METHIONINE_CATABOLISM	2/901	15/13198	0.273235	1	0.993455	2	GCLC,MTR
WP_KENNEDY_PATHWAY_FROM_SPHINGOLIPIDS	2/901	15/13198	0.273235	1	0.993455	2	PEMT,PCYT2
WP_PHYTOCHEMICAL_ACTIVITY_ON_NRF2_TRANSCRIPTIONAL_ACTIVATION	2/901	15/13198	0.273235	1	0.993455	2	GCLC,AIMP2
KEGG_SPHINGOLIPID_METABOLISM	4/901	39/13198	0.274742	1	0.993455	4	SPHK2,SMPD3,SMPD4,SMPD1
REACTOME_GENERATION_OF_SECOND_MESSENGER_MOLECULES	4/901	39/13198	0.274742	1	0.993455	4	ZAP70,EVL,CD247,LAT
WP_THE_EFFECT_OF_PROGERIN_ON_THE_INVOLVED_GENES_IN_HUTCHINSONGILFORD_PROGERIA_SYNDROME	4/901	39/13198	0.274742	1	0.993455	4	MBD3,CBX5,LEF1,TP53
REACTOME_G0_AND_EARLY_G1	3/901	27/13198	0.279278	1	0.993455	3	TFDP2,MYC,LIN52
REACTOME_POSTMITOTIC_NUCLEAR_PORE_COMPLEX_NPC_REFORMATION	3/901	27/13198	0.279278	1	0.993455	3	NUP37,NUP188,NUP107
REACTOME_VEGFR2_MEDIATED_VASCULAR_PERMEABILITY	3/901	27/13198	0.279278	1	0.993455	3	TRIB3,MLST8,PRR5
KEGG_ENDOMETRIAL_CANCER	5/901	52/13198	0.280647	1	0.993455	5	TCF7,MYC,LEF1,TP53,ERBB2
PID_CD8_TCR_PATHWAY	5/901	52/13198	0.280647	1	0.993455	5	ZAP70,PRF1,CARD11,CD247,LAT
PID_KIT_PATHWAY	5/901	52/13198	0.280647	1	0.993455	5	MATK,PTPRO,SPRED1,BCL2,SOCS1
REACTOME_BASE_EXCISION_REPAIR	8/901	91/13198	0.281219	1	0.993455	8	APEX1,MPG,LIG1,POLD2,MUTYH,NEIL1,NEIL2,FEN1
REACTOME_RNA_POLYMERASE_I_PROMOTER_ESCAPE	8/901	91/13198	0.281219	1	0.993455	8	POLR1A,RRN3,ERCC2,TWISTNB,GTF2H3,POLR1B,ERCC3,POLR1C
WP_SELENIUM_MICRONUTRIENT_NETWORK	8/901	91/13198	0.281219	1	0.993455	8	IFNG,MTR,KMO,MTHFR,TXNRD2,TXNRD3,SELENOM,SELENOH
PID_IFNG_PATHWAY	4/901	40/13198	0.290329	1	0.993455	4	IFNG,CAMK2D,PTGES2,SOCS1
REACTOME_GLUCOSE_METABOLISM	8/901	92/13198	0.2913	1	0.993455	8	NUP37,NUP188,SLC25A1,PCK2,PPP2R1A,NUP107,SLC25A12,GNPDA2
PID_HDAC_CLASSI_PATHWAY	6/901	66/13198	0.294673	1	0.993455	6	HDAC9,MBD3,WDR77,NR2C1,SIRT3,ZFPM1
PID_HIF1_TFPATHWAY	6/901	66/13198	0.294673	1	0.993455	6	TFRC,ID2,SLC2A1,NT5E,SMAD3,BNIP3
PID_INTEGRIN1_PATHWAY	6/901	66/13198	0.294673	1	0.993455	6	ITGA6,CD81,NID1,COL6A2,IGSF8,LAMA2
WP_PRADERWILLI_AND_ANGELMAN_SYNDROME	6/901	66/13198	0.294673	1	0.993455	6	CDK6,CDK4,TP53,FEZ1,ATP10A,TUBGCP5
KEGG_PATHWAYS_IN_CANCER	25/901	325/13198	0.295512	1	0.993455	25	DVL2,RASSF1,TCF7,TRAF5,FLT3LG,ITGA6,FH,CDK6,ZBTB16,PDGFRB,SLC2A1,FASLG,FLT3,CDK4,MYC,LEF1,TP53,ERBB2,WNT7A,CTBP1,FZD6,SMAD3,BCL2,PTCH1,LAMA2
PID_TCR_CALCIUM_PATHWAY	3/901	28/13198	0.298361	1	0.993455	3	NFATC2,IFNG,FASLG
REACTOME_PROCESSING_OF_CAPPED_INTRONLESS_PRE_MRNA	3/901	28/13198	0.298361	1	0.993455	3	SYMPK,CPSF4,CSTF3
WP_METASTATIC_BRAIN_TUMOR	3/901	28/13198	0.298361	1	0.993455	3	CDK6,MYC,TP53
KEGG_RIBOFLAVIN_METABOLISM	2/901	16/13198	0.299228	1	0.993455	2	MTMR1,ACP2
PID_CIRCADIAN_PATHWAY	2/901	16/13198	0.299228	1	0.993455	2	CRY2,NR1D1
REACTOME_ELEVATION_OF_CYTOSOLIC_CA2_LEVELS	2/901	16/13198	0.299228	1	0.993455	2	P2RX7,P2RX4
REACTOME_GLYCOGEN_STORAGE_DISEASES	2/901	16/13198	0.299228	1	0.993455	2	EPM2A,NHLRC1
REACTOME_GLYCOGEN_SYNTHESIS	2/901	16/13198	0.299228	1	0.993455	2	EPM2A,NHLRC1
REACTOME_NUCLEOTIDE_LIKE_PURINERGIC_RECEPTORS	2/901	16/13198	0.299228	1	0.993455	2	P2RY11,ADORA3
REACTOME_REGULATION_OF_KIT_SIGNALING	2/901	16/13198	0.299228	1	0.993455	2	YES1,SOCS1
REACTOME_SPRY_REGULATION_OF_FGF_SIGNALING	2/901	16/13198	0.299228	1	0.993455	2	PPP2R1A,SPRY2
REACTOME_TRAF6_MEDIATED_INDUCTION_OF_TAK1_COMPLEX_WITHIN_TLR4_COMPLEX	2/901	16/13198	0.299228	1	0.993455	2	SARM1,TAB1
REACTOME_TRANSCRIPTION_OF_E2F_TARGETS_UNDER_NEGATIVE_CONTROL_BY_P107_RBL1_AND_P130_RBL2_IN_COMPLEX_WITH_HDAC1	2/901	16/13198	0.299228	1	0.993455	2	TFDP2,LIN52
WP_ID_SIGNALING_PATHWAY	2/901	16/13198	0.299228	1	0.993455	2	ID2,PAX5
WP_MAPK_PATHWAY_IN_CONGENITAL_THYROID_CANCER	2/901	16/13198	0.299228	1	0.993455	2	MYC,GAREM2
WP_MITOCHONDRIAL_CIII_ASSEMBLY	2/901	16/13198	0.299228	1	0.993455	2	CYC1,UQCC3
WP_NAD_METABOLISM	2/901	16/13198	0.299228	1	0.993455	2	NT5E,SIRT3
WP_OMEGA9_FA_SYNTHESIS	2/901	16/13198	0.299228	1	0.993455	2	ACOT2,ELOVL6
WP_OSTEOCLAST_SIGNALING	2/901	16/13198	0.299228	1	0.993455	2	AIMP2,GPR68
WP_REGULATION_OF_SISTER_CHROMATID_SEPARATION_AT_THE_METAPHASEANAPHASE_TRANSITION	2/901	16/13198	0.299228	1	0.993455	2	MAD1L1,ANAPC2
PID_BETA_CATENIN_NUC_PATHWAY	7/901	80/13198	0.304512	1	0.993455	7	TCF7,ID2,MDFIC,MYC,LEF1,CTBP1,TLE1
REACTOME_NS1_MEDIATED_EFFECTS_ON_HOST_PATHWAYS	4/901	41/13198	0.306031	1	0.993455	4	NUP37,NUP188,NUP107,CPSF4
PID_TELOMERASE_PATHWAY	6/901	67/13198	0.30681	1	0.993455	6	IFNG,RAD1,DKC1,MYC,SMAD3,BLM
SIG_PIP3_SIGNALING_IN_CARDIAC_MYOCTES	6/901	67/13198	0.30681	1	0.993455	6	RPS6KA2,PAK4,MYC,PAK6,EBP,NOLC1
REACTOME_METABOLISM_OF_VITAMINS_AND_COFACTORS	15/901	189/13198	0.310046	1	0.993455	15	MTR,SLC2A1,COQ6,UBIAD1,MCCC2,NT5E,FPGS,MMAB,HLCS,CD320,LPL,MTHFR,SLC52A2,AKR1C3,DHFR
REACTOME_S_PHASE	13/901	162/13198	0.313342	1	0.993455	13	MCM2,CDC23,CDC25B,LIG1,POLD2,MCM3,TFDP2,CDC16,CDK4,MYC,FEN1,ANAPC2,LIN52
KEGG_T_CELL_RECEPTOR_SIGNALING_PATHWAY	9/901	108/13198	0.317132	1	0.993455	9	NFATC2,IFNG,ZAP70,PAK4,CDK4,PAK6,CARD11,CD247,LAT
WP_SENESCENCE_AND_AUTOPHAGY_IN_CANCER	9/901	108/13198	0.317132	1	0.993455	9	CDC25B,IFNG,ATG14,TP53,SLC39A4,SMAD3,MLST8,BCL2,CCL3
PID_BARD1_PATHWAY	3/901	29/13198	0.31751	1	0.993455	3	FANCL,TP53,FANCF
REACTOME_DAP12_SIGNALING	3/901	29/13198	0.31751	1	0.993455	3	KLRD1,LAT,KLRK1
REACTOME_ENERGY_DEPENDENT_REGULATION_OF_MTOR_BY_LKB1_AMPK	3/901	29/13198	0.31751	1	0.993455	3	CAB39L,RPTOR,MLST8
REACTOME_MRNA_CAPPING	3/901	29/13198	0.31751	1	0.993455	3	ERCC2,GTF2H3,ERCC3
WP_TCELL_RECEPTOR_AND_COSTIMULATORY_SIGNALING	3/901	29/13198	0.31751	1	0.993455	3	NFATC2,ZAP70,DYRK2
KEGG_P53_SIGNALING_PATHWAY	6/901	68/13198	0.319033	1	0.993455	6	SESN1,CDK6,CCND3,DDB2,CDK4,TP53
REACTOME_DISEASES_ASSOCIATED_WITH_O_GLYCOSYLATION_OF_PROTEINS	6/901	68/13198	0.319033	1	0.993455	6	POMGNT1,GALNT12,POMT1,ADAMTS10,ADAMTS1,SPON2
REACTOME_SIGNALING_BY_ROBO_RECEPTORS	17/901	218/13198	0.319786	1	0.993455	17	RPS5,RPS16,RPS19,RPS15,RPL36,PAK4,PAK6,ROBO3,RPL39L,RPL13,UPF3A,RPLP2,NELL2,GSPT2,EVL,RPL10A,RPS28
REACTOME_ION_TRANSPORT_BY_P_TYPE_ATPASES	5/901	55/13198	0.321441	1	0.993455	5	ATP1A3,ATP8B3,ATP8B2,CAMK2D,ATP10A
WP_DNA_IRDOUBLE_STRAND_BREAKS_DSBS_AND_CELLULAR_RESPONSE_VIA_ATM	5/901	55/13198	0.321441	1	0.993455	5	RASSF1,MDC1,TP53,RAD17,BLM
KEGG_FATTY_ACID_METABOLISM	4/901	42/13198	0.321818	1	0.993455	4	ACADS,ALDH1B1,ACAA2,ACADSB
REACTOME_PHASE_0_RAPID_DEPOLARISATION	4/901	42/13198	0.321818	1	0.993455	4	CACNA2D2,RANGRF,CACNG6,CAMK2D
WP_IL2_SIGNALING_PATHWAY	4/901	42/13198	0.321818	1	0.993455	4	IL2RB,CISH,MYC,BCL2
REACTOME_RECRUITMENT_OF_NUMA_TO_MITOTIC_CENTROSOMES	8/901	95/13198	0.322028	1	0.993455	8	OFD1,PPP2R1A,CEP250,HAUS6,MZT2B,MZT2A,HAUS5,TUBGCP5
BIOCARTA_DC_PATHWAY	2/901	17/13198	0.325063	1	0.993455	2	IFNG,CD7
BIOCARTA_PML_PATHWAY	2/901	17/13198	0.325063	1	0.993455	2	FASLG,TP53
KEGG_RENIN_ANGIOTENSIN_SYSTEM	2/901	17/13198	0.325063	1	0.993455	2	ACE,THOP1
REACTOME_REGULATION_OF_RUNX1_EXPRESSION_AND_ACTIVITY	2/901	17/13198	0.325063	1	0.993455	2	CDK6,CCND3
REACTOME_SIGNALING_BY_NTRK3_TRKC_	2/901	17/13198	0.325063	1	0.993455	2	PTPRS,PTPRO
WP_AMPLIFICATION_AND_EXPANSION_OF_ONCOGENIC_PATHWAYS_AS_METASTATIC_TRAITS	2/901	17/13198	0.325063	1	0.993455	2	TCF7,LEF1
WP_GLYCOSAMINOGLYCAN_DEGRADATION	2/901	17/13198	0.325063	1	0.993455	2	NAGLU,IDUA
WP_METABOLIC_PATHWAY_OF_LDL_HDL_AND_TG_INCLUDING_DISEASES	2/901	17/13198	0.325063	1	0.993455	2	LDLRAP1,LPL
REACTOME_PHASE_II_CONJUGATION_OF_COMPOUNDS	9/901	109/13198	0.326796	1	0.993455	9	GCLC,GSTZ1,PODXL2,ABHD14B,MTR,GGT7,ABHD10,SLC35B2,MAT2A
WP_PI3KAKT_SIGNALING_PATHWAY	26/901	345/13198	0.328016	1	0.993455	26	FLT3LG,ITGA6,IL2RB,TCL1A,PCK2,PPP2R1A,CDK6,CCND3,PDGFRB,FASLG,MYB,FLT3,CDK4,MYC,ITGB7,TP53,RPTOR,COL6A2,EPHA2,PDGFC,MLST8,DDIT4,PDGFD,BCL2,LPAR5,LAMA2
WP_HIPPOMERLIN_SIGNALING_DYSREGULATION	10/901	123/13198	0.330411	1	0.993455	10	ITGA6,PDGFRB,FLT3,PAK4,MYC,PAK6,ITGB7,CUL4A,EPHA2,DCAF1
PID_MTOR_4PATHWAY	6/901	69/13198	0.331326	1	0.993455	6	RRN3,RPTOR,MLST8,DDIT4,BNIP3,PRR5
REACTOME_GOLGI_ASSOCIATED_VESICLE_BIOGENESIS	5/901	56/13198	0.3352	1	0.993455	5	TFRC,TPD52,HIP1R,BLOC1S4,BLOC1S3
WP_MITOCHONDRIAL_COMPLEX_I_ASSEMBLY_MODEL_OXPHOS_SYSTEM	5/901	56/13198	0.3352	1	0.993455	5	NDUFB7,NDUFV1,ACAD9,NDUFAF3,NDUFS3
PID_P38_ALPHA_BETA_PATHWAY	3/901	30/13198	0.336675	1	0.993455	3	TAB1,BLK,YES1
REACTOME_ACTIVATION_OF_BH3_ONLY_PROTEINS	3/901	30/13198	0.336675	1	0.993455	3	TFDP2,TP53,BCL2
REACTOME_LAMININ_INTERACTIONS	3/901	30/13198	0.336675	1	0.993455	3	ITGA6,NID1,LAMA2
REACTOME_REGULATION_OF_TP53_ACTIVITY_THROUGH_ACETYLATION	3/901	30/13198	0.336675	1	0.993455	3	MBD3,TP53,ING5
WP_AUTOPHAGY	3/901	30/13198	0.336675	1	0.993455	3	ATG14,RPTOR,MLST8
WP_EICOSANOID_METABOLISM_VIA_CYCLO_OXYGENASES_COX	3/901	30/13198	0.336675	1	0.993455	3	PTGDS,PTGDR,PTGDR2
KEGG_TYPE_I_DIABETES_MELLITUS	4/901	43/13198	0.33766	1	0.993455	4	IFNG,FASLG,PRF1,HLA-DOA
KEGG_HYPERTROPHIC_CARDIOMYOPATHY_HCM	7/901	83/13198	0.338067	1	0.993455	7	CACNA2D2,ITGA6,CACNG6,ITGB7,ACE,LAMA2,TPM2
WP_SIGNALING_PATHWAYS_IN_GLIOBLASTOMA	7/901	83/13198	0.338067	1	0.993455	7	PRKCH,CDK6,PDGFRB,CDK4,SPRY2,TP53,ERBB2
REACTOME_GLYCOSAMINOGLYCAN_METABOLISM	10/901	124/13198	0.339581	1	0.993455	10	HS3ST1,NAGLU,B3GAT1,HS3ST3B1,IDUA,CHST12,B3GAT3,SLC35B2,CHST14,B3GALT6
REACTOME_TOLL_LIKE_RECEPTOR_TLR1_TLR2_CASCADE	8/901	97/13198	0.342835	1	0.993455	8	RPS6KA2,TAB1,PPP2R1A,CD36,S100B,DUSP7,SIGIRR,SOCS1
REACTOME_RNA_POLYMERASE_I_TRANSCRIPTION	9/901	111/13198	0.346281	1	0.993455	9	POLR1A,MBD3,RRN3,ERCC2,TWISTNB,GTF2H3,POLR1B,ERCC3,POLR1C
KEGG_ACUTE_MYELOID_LEUKEMIA	5/901	57/13198	0.349007	1	0.993455	5	TCF7,ZBTB16,FLT3,MYC,LEF1
REACTOME_TRANSCRIPTIONAL_REGULATION_OF_WHITE_ADIPOCYTE_DIFFERENTIATION	7/901	84/13198	0.349366	1	0.993455	7	MED24,CCND3,CD36,CDK4,TGS1,LPL,SREBF2
BIOCARTA_CHEMICAL_PATHWAY	2/901	18/13198	0.35064	1	0.993455	2	TP53,BCL2
BIOCARTA_MCM_PATHWAY	2/901	18/13198	0.35064	1	0.993455	2	MCM2,MCM3
REACTOME_METABOLISM_OF_ANGIOTENSINOGEN_TO_ANGIOTENSINS	2/901	18/13198	0.35064	1	0.993455	2	GZMH,ACE
REACTOME_TP53_REGULATES_TRANSCRIPTION_OF_GENES_INVOLVED_IN_G2_CELL_CYCLE_ARREST	2/901	18/13198	0.35064	1	0.993455	2	TFDP2,TP53
WP_MAMMARY_GLAND_DEVELOPMENT_PATHWAY_EMBRYONIC_DEVELOPMENT_STAGE_1_OF_4	2/901	18/13198	0.35064	1	0.993455	2	ITGA6,MYC
WP_REGULATION_OF_WNTBCATENIN_SIGNALING_BY_SMALL_MOLECULE_COMPOUNDS	2/901	18/13198	0.35064	1	0.993455	2	DVL2,LEF1
WP_TCA_CYCLE_AKA_KREBS_OR_CITRIC_ACID_CYCLE	2/901	18/13198	0.35064	1	0.993455	2	FH,IDH2
REACTOME_METABOLISM_OF_CARBOHYDRATES	22/901	293/13198	0.352387	1	0.993455	22	HS3ST1,NUP37,NUP188,SLC25A1,PCK2,PPP2R1A,NAGLU,B3GAT1,NUP107,EPM2A,SLC25A12,SLC2A1,HS3ST3B1,IDUA,CHST12,TKFC,B3GAT3,SLC35B2,GNPDA2,CHST14,B3GALT6,NHLRC1
BIOCARTA_TCR_PATHWAY	4/901	44/13198	0.353529	1	0.993455	4	NFATC2,ZAP70,CD247,LAT
WP_NEURODEGENERATION_WITH_BRAIN_IRON_ACCUMULATION_NBIA_SUBTYPES_PATHWAY	4/901	44/13198	0.353529	1	0.993455	4	ATG14,C19orf12,RPTOR,MLST8
KEGG_CITRATE_CYCLE_TCA_CYCLE	3/901	31/13198	0.355808	1	0.993455	3	FH,PCK2,IDH2
PID_AURORA_A_PATHWAY	3/901	31/13198	0.355808	1	0.993455	3	CDC25B,GIT1,TP53
REACTOME_GLYOXYLATE_METABOLISM_AND_GLYCINE_DEGRADATION	3/901	31/13198	0.355808	1	0.993455	3	LIAS,GCSH,BCKDHA
REACTOME_MAPK_TARGETS_NUCLEAR_EVENTS_MEDIATED_BY_MAP_KINASES	3/901	31/13198	0.355808	1	0.993455	3	RPS6KA2,PPP2R1A,DUSP7
KEGG_MELANOMA	6/901	71/13198	0.35607	1	0.993455	6	CDK6,PDGFRB,CDK4,TP53,PDGFC,PDGFD
REACTOME_SUMOYLATION_OF_CHROMATIN_ORGANIZATION_PROTEINS	6/901	71/13198	0.35607	1	0.993455	6	NUP37,CBX5,NUP188,L3MBTL2,NUP107,SUMO3
WP_TGFBETA_RECEPTOR_SIGNALING	5/901	58/13198	0.362843	1	0.993455	5	RUNX3,IFNG,LEF1,SMAD3,NOG
REACTOME_GLYCOSPHINGOLIPID_METABOLISM	4/901	45/13198	0.369398	1	0.993455	4	SMPD3,SMPD4,ESYT1,SMPD1
WP_NEPHROTIC_SYNDROME	4/901	45/13198	0.369398	1	0.993455	4	COQ6,PTPRO,MYO1E,SYNPO
KEGG_ALANINE_ASPARTATE_AND_GLUTAMATE_METABOLISM	3/901	32/13198	0.374866	1	0.993455	3	CAD,NIT2,PPAT
REACTOME_REGULATION_OF_GLUCOKINASE_BY_GLUCOKINASE_REGULATORY_PROTEIN	3/901	32/13198	0.374866	1	0.993455	3	NUP37,NUP188,NUP107
REACTOME_SMAD2_SMAD3_SMAD4_HETEROTRIMER_REGULATES_TRANSCRIPTION	3/901	32/13198	0.374866	1	0.993455	3	TFDP2,MYC,SMAD3
BIOCARTA_TGFB_PATHWAY	2/901	19/13198	0.375874	1	0.993455	2	TAB1,SMAD3
REACTOME_AFLATOXIN_ACTIVATION_AND_DETOXIFICATION	2/901	19/13198	0.375874	1	0.993455	2	GGT7,ACY1
REACTOME_ASSEMBLY_OF_ACTIVE_LPL_AND_LIPC_LIPASE_COMPLEXES	2/901	19/13198	0.375874	1	0.993455	2	LMF1,LPL
REACTOME_METABOLISM_OF_COFACTORS	2/901	19/13198	0.375874	1	0.993455	2	COQ6,DHFR
REACTOME_OTHER_SEMAPHORIN_INTERACTIONS	2/901	19/13198	0.375874	1	0.993455	2	CD72,PLXNA4
WP_NUCLEOTIDE_METABOLISM	2/901	19/13198	0.375874	1	0.993455	2	SRM,DHFR
WP_OVERVIEW_OF_NANOPARTICLE_EFFECTS	2/901	19/13198	0.375874	1	0.993455	2	CCND3,BCL2
KEGG_CHRONIC_MYELOID_LEUKEMIA	6/901	73/13198	0.380934	1	0.993455	6	CDK6,CDK4,MYC,TP53,CTBP1,SMAD3
KEGG_HEMATOPOIETIC_CELL_LINEAGE	7/901	87/13198	0.38346	1	0.993455	7	CD22,TFRC,FLT3LG,ITGA6,FLT3,CD36,CD7
REACTOME_CELLULAR_RESPONSE_TO_HEAT_STRESS	8/901	101/13198	0.384925	1	0.993455	8	NUP37,NUP188,NUP107,RPTOR,CAMK2D,TNFRSF21,CCAR2,MLST8
PID_PS1_PATHWAY	4/901	46/13198	0.385241	1	0.993455	4	TAB1,MYC,CTBP1,TLE1
REACTOME_SUMOYLATION_OF_DNA_REPLICATION_PROTEINS	4/901	46/13198	0.385241	1	0.993455	4	NUP37,NUP188,NUP107,SUMO3
SIG_BCR_SIGNALING_PATHWAY	4/901	46/13198	0.385241	1	0.993455	4	CD22,NFATC2,CD81,BCL2
REACTOME_REGULATION_OF_EXPRESSION_OF_SLITS_AND_ROBOS	13/901	172/13198	0.393203	1	0.993455	13	RPS5,RPS16,RPS19,RPS15,RPL36,ROBO3,RPL39L,RPL13,UPF3A,RPLP2,GSPT2,RPL10A,RPS28
PID_INTEGRIN_A4B1_PATHWAY	3/901	33/13198	0.393808	1	0.993455	3	GIT1,CD81,IGSF8
REACTOME_EXPORT_OF_VIRAL_RIBONUCLEOPROTEINS_FROM_NUCLEUS	3/901	33/13198	0.393808	1	0.993455	3	NUP37,NUP188,NUP107
REACTOME_FORMATION_OF_THE_EARLY_ELONGATION_COMPLEX	3/901	33/13198	0.393808	1	0.993455	3	ERCC2,GTF2H3,ERCC3
REACTOME_PLASMA_LIPOPROTEIN_CLEARANCE	3/901	33/13198	0.393808	1	0.993455	3	LSR,LIPA,LDLRAP1
WP_INFLAMMATORY_RESPONSE_PATHWAY	3/901	33/13198	0.393808	1	0.993455	3	IL2RB,IFNG,ZAP70
WP_22Q112_DELETION_SYNDROME	8/901	102/13198	0.395499	1	0.993455	8	CBX5,ARVCF,TRMT2A,SLC25A1,DGCR6L,THAP7,TXNRD2,SCARF2
REACTOME_FGFR2_LIGAND_BINDING_AND_ACTIVATION	2/901	20/13198	0.400694	1	0.993455	2	FGFBP2,FGFBP3
REACTOME_INFLAMMASOMES	2/901	20/13198	0.400694	1	0.993455	2	P2RX7,BCL2
REACTOME_SEMA4D_INDUCED_CELL_MIGRATION_AND_GROWTH_CONE_COLLAPSE	2/901	20/13198	0.400694	1	0.993455	2	ERBB2,RHOC
REACTOME_TP53_REGULATES_TRANSCRIPTION_OF_GENES_INVOLVED_IN_CYTOCHROME_C_RELEASE	2/901	20/13198	0.400694	1	0.993455	2	TP53,ZNF420
ST_WNT_CA2_CYCLIC_GMP_PATHWAY	2/901	20/13198	0.400694	1	0.993455	2	PDE6B,CAMK2D
PID_LKB1_PATHWAY	4/901	47/13198	0.401033	1	0.993455	4	MYC,TP53,RPTOR,MLST8
WP_ENDODERM_DIFFERENTIATION	11/901	145/13198	0.403677	1	0.993455	11	TBX21,SESN1,TCF7,C1QBP,CEP250,LRPPRC,LEF1,ATP8B2,EOMES,SMAD3,NOG
PID_TRKR_PATHWAY	5/901	61/13198	0.404353	1	0.993455	5	MATK,DNAJA3,GIPC1,FRS3,MAGED1
REACTOME_REGULATION_OF_PTEN_GENE_TRANSCRIPTION	5/901	61/13198	0.404353	1	0.993455	5	MBD3,ATN1,TP53,RPTOR,MLST8
KEGG_B_CELL_RECEPTOR_SIGNALING_PATHWAY	6/901	75/13198	0.405814	1	0.993455	6	CD22,NFATC2,CD81,CD72,RASGRP3,CARD11
WP_FOCAL_ADHESION	15/901	202/13198	0.406248	1	0.993455	15	TXK,ITGA6,CCND3,PDGFRB,PAK4,BLK,PAK6,ITGB7,ERBB2,COL6A2,PDGFC,PDGFD,BCL2,LAMA2,MYL5
REACTOME_REGULATION_OF_TP53_ACTIVITY	12/901	160/13198	0.411033	1	0.993455	12	MBD3,PPP2R1A,RAD1,DYRK2,TP53,RAD17,ATRIP,MLST8,ING5,PRR5,NOC2L,BLM
KEGG_CYSTEINE_AND_METHIONINE_METABOLISM	3/901	34/13198	0.412597	1	0.993455	3	SRM,MTR,MAT2A
KEGG_FRUCTOSE_AND_MANNOSE_METABOLISM	3/901	34/13198	0.412597	1	0.993455	3	MTMR1,GMPPB,MPI
PID_EPHA_FWDPATHWAY	3/901	34/13198	0.412597	1	0.993455	3	BLK,EPHA2,YES1
REACTOME_GLUCONEOGENESIS	3/901	34/13198	0.412597	1	0.993455	3	SLC25A1,PCK2,SLC25A12
REACTOME_NUCLEAR_IMPORT_OF_REV_PROTEIN	3/901	34/13198	0.412597	1	0.993455	3	NUP37,NUP188,NUP107
REACTOME_RAF_ACTIVATION	3/901	34/13198	0.412597	1	0.993455	3	PPP2R1A,CAMK2D,PHB
REACTOME_SIGNALING_BY_WNT_IN_CANCER	3/901	34/13198	0.412597	1	0.993455	3	PPP2R1A,CTBP1,FZD6
REACTOME_SYNTHESIS_OF_BILE_ACIDS_AND_BILE_SALTS	3/901	34/13198	0.412597	1	0.993455	3	OSBPL7,OSBPL3,AKR1C3
REACTOME_THE_PHOTOTRANSDUCTION_CASCADE	3/901	34/13198	0.412597	1	0.993455	3	SLC24A1,RGS9,PDE6B
REACTOME_TRANSCRIPTIONAL_REGULATION_BY_E2F6	3/901	34/13198	0.412597	1	0.993455	3	CBX5,L3MBTL2,TFDP2
WP_OXIDATIVE_STRESS	3/901	34/13198	0.412597	1	0.993455	3	GCLC,TXNRD2,MT1X
KEGG_OXIDATIVE_PHOSPHORYLATION	10/901	132/13198	0.414048	1	0.993455	10	COX10,NDUFB7,LHPP,NDUFS7,PPA2,NDUFV1,ATP6V0E2,NDUFA11,CYC1,NDUFS3
PID_PI3KCI_PATHWAY	4/901	48/13198	0.416751	1	0.993455	4	ZAP70,BLK,YES1,LAT
WP_ARYL_HYDROCARBON_RECEPTOR_NETPATH	4/901	48/13198	0.416751	1	0.993455	4	GCLC,CD36,MYC,LPL
REACTOME_CA2_PATHWAY	5/901	62/13198	0.418133	1	0.993455	5	TCF7,PDE6B,MYC,LEF1,FZD6
WP_HEMATOPOIETIC_STEM_CELL_DIFFERENTIATION	5/901	62/13198	0.418133	1	0.993455	5	NFATC2,MYB,LEF1,HES6,RHOH
WP_OXIDATIVE_PHOSPHORYLATION	5/901	62/13198	0.418133	1	0.993455	5	NDUFB7,NDUFS7,NDUFV1,NDUFA11,NDUFS3
REACTOME_CELL_DEATH_SIGNALLING_VIA_NRAGE_NRIF_AND_NADE	6/901	76/13198	0.41823	1	0.993455	6	TRIO,PLEKHG2,ARHGEF9,ARHGEF4,OBSCN,MAGED1
REACTOME_NUCLEAR_ENVELOPE_NE_REASSEMBLY	6/901	76/13198	0.41823	1	0.993455	6	NUP37,NUP188,PPP2R1A,NUP107,VPS4A,CHMP6
WP_PROLACTIN_SIGNALING_PATHWAY	6/901	76/13198	0.41823	1	0.993455	6	RPS6KA2,CISH,ZAP70,MYC,ERBB2,SOCS1
REACTOME_TRANSCRIPTIONAL_REGULATION_BY_TP53	26/901	362/13198	0.423	1	0.993455	26	MBD3,SESN1,RABGGTA,ERCC2,PPP2R1A,GTF2H3,RAD1,TFDP2,DYRK2,DDB2,MDC1,LRPPRC,FANCI,TP53,RPTOR,RAD17,ERCC3,ATRIP,MLST8,DDIT4,ING5,RAD51D,PRR5,NOC2L,ZNF420,BLM
BIOCARTA_CERAMIDE_PATHWAY	2/901	21/13198	0.425037	1	0.993455	2	SMPD1,BCL2
BIOCARTA_P53HYPOXIA_PATHWAY	2/901	21/13198	0.425037	1	0.993455	2	TP53,HIC1
PID_P38_MK2_PATHWAY	2/901	21/13198	0.425037	1	0.993455	2	TCF3,CDC25B
PID_S1P_META_PATHWAY	2/901	21/13198	0.425037	1	0.993455	2	SPHK2,S1PR5
REACTOME_CELLULAR_HEXOSE_TRANSPORT	2/901	21/13198	0.425037	1	0.993455	2	SLC2A1,SLC2A11
REACTOME_CTLA4_INHIBITORY_SIGNALING	2/901	21/13198	0.425037	1	0.993455	2	PPP2R1A,YES1
REACTOME_REGULATION_OF_FZD_BY_UBIQUITINATION	2/901	21/13198	0.425037	1	0.993455	2	LGR6,FZD6
REACTOME_SYNTHESIS_OF_LEUKOTRIENES_LT_AND_EOXINS_EX_	2/901	21/13198	0.425037	1	0.993455	2	ALOX15,LTC4S
WP_PATHOGENESIS_OF_SARSCOV2_MEDIATED_BY_NSP9NSP10_COMPLEX	2/901	21/13198	0.425037	1	0.993455	2	ZAP70,CD247
WP_SIMPLIFIED_INTERACTION_MAP_BETWEEN_LOXL4_AND_OXIDATIVE_STRESS_PATHWAY	2/901	21/13198	0.425037	1	0.993455	2	PKD1,DDR1
PID_ARF6_PATHWAY	3/901	35/13198	0.431198	1	0.993455	3	GIT1,EPHA2,ADRB2
PID_HIV_NEF_PATHWAY	3/901	35/13198	0.431198	1	0.993455	3	FASLG,BCL2,CD247
REACTOME_SUMOYLATION_OF_SUMOYLATION_PROTEINS	3/901	35/13198	0.431198	1	0.993455	3	NUP37,NUP188,NUP107
SIG_REGULATION_OF_THE_ACTIN_CYTOSKELETON_BY_RHO_GTPASES	3/901	35/13198	0.431198	1	0.993455	3	PAK4,PAK6,CFL2
REACTOME_CYTOSOLIC_SENSORS_OF_PATHOGEN_ASSOCIATED_DNA_	5/901	63/13198	0.43186	1	0.993455	5	POLR3E,POLR3H,POLR3A,NLRC3,POLR1C
WP_EXERCISEINDUCED_CIRCADIAN_REGULATION	4/901	49/13198	0.432374	1	0.993455	4	KLF9,CRY2,NR1D2,SUMO3
REACTOME_MITOTIC_G1_PHASE_AND_G1_S_TRANSITION	11/901	149/13198	0.439256	1	0.993455	11	MCM2,PPP2R1A,CDK6,MCM3,CCND3,TFDP2,CDK4,MYC,TK1,LIN52,DHFR
REACTOME_REGULATION_OF_TP53_ACTIVITY_THROUGH_PHOSPHORYLATION	7/901	92/13198	0.44035	1	0.993455	7	RAD1,DYRK2,TP53,RAD17,ATRIP,NOC2L,BLM
REACTOME_UNFOLDED_PROTEIN_RESPONSE_UPR_	7/901	92/13198	0.44035	1	0.993455	7	EXOSC5,EXOSC8,EXOSC9,PARN,SRPRB,YIF1A,EXOSC6
WP_CIRCADIAN_RHYTHM_RELATED_GENES	15/901	207/13198	0.444004	1	0.993455	15	PER3,DBP,PTGDS,NAGLU,ID2,KLF9,CRY2,NR1D1,MYBBP1A,CDK4,TP53,CCAR2,NR1D2,MAGED1,PRF1
REACTOME_SIGNALING_BY_FGFR1	4/901	50/13198	0.44788	1	0.993455	4	PPP2R1A,SPRY2,FRS3,SPRED1
WP_MIRNAS_INVOLVED_IN_DNA_DAMAGE_RESPONSE	4/901	50/13198	0.44788	1	0.993455	4	CDK6,CCND3,MYC,TP53
BIOCARTA_CSK_PATHWAY	2/901	22/13198	0.448854	1	0.993455	2	ZAP70,CD247
BIOCARTA_EICOSANOID_PATHWAY	2/901	22/13198	0.448854	1	0.993455	2	EPHX2,PTGER2
KEGG_BETA_ALANINE_METABOLISM	2/901	22/13198	0.448854	1	0.993455	2	SRM,ALDH1B1
KEGG_BIOSYNTHESIS_OF_UNSATURATED_FATTY_ACIDS	2/901	22/13198	0.448854	1	0.993455	2	ACOT2,ELOVL6
[truncated: 1,201 more rows]

## Sheet: fisher_C7_up
ID	GeneRatio	BgRatio	pvalue	p.adjust	qvalue	Count	geneID
[truncated: 4,872 more rows]

[truncated: 4 more sheets: fisher_C7_dn, fgsea_H_all, fgsea_CP_all, fgsea_C7_all]
